# Supplementary material for: Identification and Characterization of 293T Cell-Derived Exosomes by Profiling the Protein, mRNA and MicroRNA Components
Source: PubMed Central journal article supplement (PMC5029934; doi:10.1371/journal.pone.0163043), 2016-09-20
Supplement: pone.0163043.s002.pdf [file pone.0163043.s002.pdf]

| UNIPROT_ACCESSION | Name                                                                                                                        |
|-------------------|-----------------------------------------------------------------------------------------------------------------------------|
| P0CG48            | Polyubiquitin-C OS=Homo sapiens GN=UBC PE=1 SV=3 - [UBC_HUMAN]                                                              |
| P07737            | Profilin-1 OS=Homo sapiens GN=PFN1 PE=1 SV=2 - [PROF1_HUMAN]                                                                |
| P63244            | Guanine nucleotide-binding protein subunit beta-2-like 1 OS=Homo sapiens GN=GNB2L1 PE=1 SV=3 - [GNBLP_HUMAN]                |
| Q9BQE3            | Tubulin alpha-1C chain OS=Homo sapiens GN=TUBA1C PE=1 SV=1 - [TBA1C_HUMAN]                                                  |
| P05387            | 60S acidic ribosomal protein P2 OS=Homo sapiens GN=RPLP2 PE=1 SV=1 - [RLA2_HUMAN]                                           |
| P07437            | Tubulin beta chain OS=Homo sapiens GN=TUBB PE=1 SV=2 - [TBB5_HUMAN]                                                         |
| P68371            | Tubulin beta-4B chain OS=Homo sapiens GN=TUBB4B PE=1 SV=1 - [TBB4B_HUMAN]                                                   |
| P04350            | Tubulin beta-4A chain OS=Homo sapiens GN=TUBB4A PE=1 SV=2 - [TBB4A_HUMAN]                                                   |
| P49773            | Histidine triad nucleotide-binding protein 1 OS=Homo sapiens GN=HINT1 PE=1 SV=2 - [HINT1_HUMAN]                             |
| Q15365            | Poly(rC)-binding protein 1 OS=Homo sapiens GN=PCBP1 PE=1 SV=2 - [PCBP1_HUMAN]                                               |
| Q9BVA1            | Tubulin beta-2B chain OS=Homo sapiens GN=TUBB2B PE=1 SV=1 - [TBB2B_HUMAN]                                                   |
| 000560            | Syntenin-1 OS=Homo sapiens GN=SDCBP PE=1 SV=1 - [SDCB1_HUMAN]                                                               |
| P62937            | Peptidyl-prolyl cis-trans isomerase A OS=Homo sapiens GN=PP1A PE=1 SV=2 - [PP1A_HUMAN]                                      |
| P60660            | Myosin light polypeptide 6 OS=Homo sapiens GN=MYL6 PE=1 SV=2 - [MYL6_HUMAN]                                                 |
| P68104            | Elongation factor 1-alpha 1 OS=Homo sapiens GN=EEF1A1 PE=1 SV=1 - [EF1A1_HUMAN]                                             |
| Q9UMS4            | Pre-mRNA-processing factor 19 OS=Homo sapiens GN=PRPF19 PE=1 SV=1 - [PRP19_HUMAN]                                           |
| Q9BQA1            | Methylome protein 50 OS=Homo sapiens GN=WDR77 PE=1 SV=1 - [MEP50_HUMAN]                                                     |
| Q13347            | Eukaryotic translation initiation factor 3 subunit I OS=Homo sapiens GN=EIF3I PE=1 SV=1 - [EIF3I_HUMAN]                     |
| P12277            | Creatine kinase B-type OS=Homo sapiens GN=CKB PE=1 SV=1 - [KCRB_HUMAN]                                                      |
| P60709            | Actin, cytoplasmic 1 OS=Homo sapiens GN=ACTB PE=1 SV=1 - [ACTB_HUMAN]                                                       |
| P63218            | Guanine nucleotide-binding protein G(I)/G(S)/G(O) subunit gamma-5 OS=Homo sapiens GN=GNG5 PE=1 SV=3 - [GBG5_HUMAN]          |
| P04075            | Fructose-bisphosphate aldolase A OS=Homo sapiens GN=ALDOA PE=1 SV=2 - [ALDOA_HUMAN]                                         |
| P35244            | Replication protein A 14 kDa subunit OS=Homo sapiens GN=RPA3 PE=1 SV=1 - [RFA3_HUMAN]                                       |
| P19623            | Spermidine synthase OS=Homo sapiens GN=SRM PE=1 SV=1 - [SPEE_HUMAN]                                                         |
| Q08431            | Lactadherin OS=Homo sapiens GN=MPGE8 PE=1 SV=2 - [MPGM_HUMAN]                                                               |
| P14618            | Pyruvate kinase PKM OS=Homo sapiens GN=PKM PE=1 SV=4 - [KPYM_HUMAN]                                                         |
| P23528            | Cofilin-1 OS=Homo sapiens GN=CFL1 PE=1 SV=3 - [COF1_HUMAN]                                                                  |
| P02787            | Serotransferrin OS=Homo sapiens GN=TF PE=1 SV=3 - [TRFE_HUMAN]                                                              |
| P14543            | Nidogen-1 OS=Homo sapiens GN=NID1 PE=1 SV=3 - [NID1_HUMAN]                                                                  |
| Q9BVF5            | Tubulin beta-6 chain OS=Homo sapiens GN=TUBB6 PE=1 SV=1 - [TBB6_HUMAN]                                                      |
| P08670            | Vimentin OS=Homo sapiens GN=VIM PE=1 SV=4 - [VIME_HUMAN]                                                                    |
| P35998            | 26S protease regulatory subunit 7 OS=Homo sapiens GN=PSMC2 PE=1 SV=3 - [PRS7_HUMAN]                                         |
| P50990            | T-complex protein 1 subunit theta OS=Homo sapiens GN=CCT8 PE=1 SV=4 - [TCPQ_HUMAN]                                          |
| Q13526            | Peptidyl-prolyl cis-trans isomerase NIMA-interacting 1 OS=Homo sapiens GN=PIN1 PE=1 SV=1 - [PIN1_HUMAN]                     |
| Q99832            | T-complex protein 1 subunit eta OS=Homo sapiens GN=CCT7 PE=1 SV=2 - [TCPH_HUMAN]                                            |
| P35606            | Coatomer subunit beta' OS=Homo sapiens GN=COPB2 PE=1 SV=2 - [COPB2_HUMAN]                                                   |
| P49721            | Proteasome subunit beta type-2 OS=Homo sapiens GN=PSMB2 PE=1 SV=1 - [PSB2_HUMAN]                                            |
| P51149            | Ras-related protein Rab-7a OS=Homo sapiens GN=RAB7A PE=1 SV=1 - [RAB7A_HUMAN]                                               |
| P62979            | Ubiquitin-40S ribosomal protein S27a OS=Homo sapiens GN=RPS27A PE=1 SV=2 - [RS27A_HUMAN]                                    |
| P60174            | Triosephosphate isomerase OS=Homo sapiens GN=TP11 PE=1 SV=3 - [TP1S_HUMAN]                                                  |
| P62244            | 40S ribosomal protein S15a OS=Homo sapiens GN=RPS15A PE=1 SV=2 - [RS15A_HUMAN]                                              |
| Q9UNM6            | 26S proteasome non-ATPase regulatory subunit 13 OS=Homo sapiens GN=PSMD13 PE=1 SV=2 - [PSD13_HUMAN]                         |
| Q9UK41            | Vacuolar protein-sorting-associated protein 28 homolog OS=Homo sapiens GN=VPS28 PE=1 SV=1 - [VPS28_HUMAN]                   |
| Q13885            | Tubulin beta-2A chain OS=Homo sapiens GN=TUBB2A PE=1 SV=1 - [TBB2A_HUMAN]                                                   |
| Q9HAM9            | EH domain-containing protein 1 OS=Homo sapiens GN=EHD1 PE=1 SV=2 - [EHD1_HUMAN]                                             |
| P68366            | Tubulin alpha-4A chain OS=Homo sapiens GN=TUBA4A PE=1 SV=1 - [TBA4A_HUMAN]                                                  |
| Q8WUM4            | Programmed cell death 6-interacting protein OS=Homo sapiens GN=PDCC6IP PE=1 SV=1 - [PDCC6I_HUMAN]                           |
| 075369            | Filamin-B OS=Homo sapiens GN=FLNB PE=1 SV=2 - [FLNB_HUMAN]                                                                  |
| P00492            | Hypoxanthine-guanine phosphoribosyltransferase OS=Homo sapiens GN=HPRT1 PE=1 SV=2 - [HPRT_HUMAN]                            |
| P40227            | T-complex protein 1 subunit zeta OS=Homo sapiens GN=CCT6A PE=1 SV=3 - [TCPZ_HUMAN]                                          |
| Q05639            | Elongation factor 1-alpha 2 OS=Homo sapiens GN=EEF1A2 PE=1 SV=1 - [EF1A2_HUMAN]                                             |
| P62263            | 40S ribosomal protein S14 OS=Homo sapiens GN=RPS14 PE=1 SV=3 - [RS14_HUMAN]                                                 |
| Q9BWF5            | Splicing factor 3B subunit 5 OS=Homo sapiens GN=SF3B5 PE=1 SV=1 - [SF3B5_HUMAN]                                             |
| Q99873            | Protein arginine N-methyltransferase 1 OS=Homo sapiens GN=PRMT1 PE=1 SV=2 - [ANM1_HUMAN]                                    |
| P50991            | T-complex protein 1 subunit delta OS=Homo sapiens GN=CCT4 PE=1 SV=4 - [TCPD_HUMAN]                                          |
| P62714            | Serine/threonine-protein phosphatase 2A catalytic subunit beta isoform OS=Homo sapiens GN=PPP2CB PE=1 SV=1 - [PP2AB_HUMAN]  |
| P67775            | Serine/threonine-protein phosphatase 2A catalytic subunit alpha isoform OS=Homo sapiens GN=PPP2CA PE=1 SV=1 - [PP2AA_HUMAN] |
| P60900            | Proteasome subunit alpha type-6 OS=Homo sapiens GN=PSMA6 PE=1 SV=1 - [PSA6_HUMAN]                                           |
| P25786            | Proteasome subunit alpha type-1 OS=Homo sapiens GN=PSMA1 PE=1 SV=1 - [PSA1_HUMAN]                                           |
| Q92743            | Serine protease HTRA1 OS=Homo sapiens GN=HTRA1 PE=1 SV=1 - [HTRA1_HUMAN]                                                    |
| P02751            | Fibronectin OS=Homo sapiens GN=FN1 PE=1 SV=4 - [FN1C_HUMAN]                                                                 |
| P53621            | Coatomer subunit alpha OS=Homo sapiens GN=COPA PE=1 SV=2 - [COPA_HUMAN]                                                     |
| P62304            | Small nuclear ribonucleoprotein E OS=Homo sapiens GN=SNRPE PE=1 SV=1 - [RUXE_HUMAN]                                         |
| Q05048            | Cleavage stimulation factor subunit 1 OS=Homo sapiens GN=CSTF1 PE=1 SV=1 - [CSTF1_HUMAN]                                    |
| P28066            | Proteasome subunit alpha type-5 OS=Homo sapiens GN=PSMA5 PE=1 SV=3 - [PSA5_HUMAN]                                           |
| P55072            | Transitional endoplasmic reticulum ATPase OS=Homo sapiens GN=VCP PE=1 SV=4 - [TERA_HUMAN]                                   |
| P04406            | Glyceraldehyde-3-phosphate dehydrogenase OS=Homo sapiens GN=GAPDH PE=1 SV=3 - [G3P_HUMAN]                                   |
| P06493            | Cyclin-dependent kinase 1 OS=Homo sapiens GN=CDK1 PE=1 SV=3 - [CDK1_HUMAN]                                                  |
| P30086            | Phosphatidylethanolamine-binding protein 1 OS=Homo sapiens GN=PEBP1 PE=1 SV=3 - [PEBP1_HUMAN]                               |
| P31939            | Bifunctional purine biosynthesis protein PURH OS=Homo sapiens GN=ATIC PE=1 SV=3 - [PUR9_HUMAN]                              |
| P23396            | 40S ribosomal protein S3 OS=Homo sapiens GN=RPS3 PE=1 SV=2 - [RS3_HUMAN]                                                    |
| Q9Y315            | Deoxyribose-phosphate aldolase OS=Homo sapiens GN=DERA PE=1 SV=2 - [DEOC_HUMAN]                                             |
| P07108            | Acyl-CoA-binding protein OS=Homo sapiens GN=DBI PE=1 SV=2 - [ACBP_HUMAN]                                                    |
| P43686            | 26S protease regulatory subunit 6B OS=Homo sapiens GN=PSMC4 PE=1 SV=2 - [PRS6B_HUMAN]                                       |
| Q06830            | Peroxisome protein 1 OS=Homo sapiens GN=PRDX1 PE=1 SV=1 - [PRDX1_HUMAN]                                                     |
| P01834            | Ig kappa chain C region OS=Homo sapiens GN=IGKC PE=1 SV=1 - [IGKC_HUMAN]                                                    |
| P62136            | Serine/threonine-protein phosphatase PP1-alpha catalytic subunit OS=Homo sapiens GN=PPP1CA PE=1 SV=1 - [PP1A_HUMAN]         |
| P49327            | Fatty acid synthase OS=Homo sapiens GN=FASN PE=1 SV=3 - [FASN_HUMAN]                                                        |
| Q9P000            | COMM domain-containing protein 9 OS=Homo sapiens GN=COMM9 PE=1 SV=2 - [COMM9_HUMAN]                                         |
| P62888            | 60S ribosomal protein L30 OS=Homo sapiens GN=RPL30 PE=1 SV=2 - [RL30_HUMAN]                                                 |
| Q9HCN8            | Stromal cell-derived factor 2-like protein 1 OS=Homo sapiens GN=SDF2L1 PE=1 SV=2 - [SDF2L_HUMAN]                            |
| P63241            | Eukaryotic translation initiation factor 5A-1 OS=Homo sapiens GN=EIF5A PE=1 SV=2 - [IF5A1_HUMAN]                            |
| P62829            | 60S ribosomal protein L23 OS=Homo sapiens GN=RPL23 PE=1 SV=1 - [RL23_HUMAN]                                                 |
| P53396            | ATP-citrate synthase OS=Homo sapiens GN=ACLY PE=1 SV=3 - [ACLY_HUMAN]                                                       |
| 000231            | 26S proteasome non-ATPase regulatory subunit 11 OS=Homo sapiens GN=PSMD11 PE=1 SV=3 - [PSD11_HUMAN]                         |
| Q92747            | Actin-related protein 2/3 complex subunit 1A OS=Homo sapiens GN=ARPC1A PE=1 SV=2 - [ARPC1A_HUMAN]                           |
| P61964            | WD repeat-containing protein 5 OS=Homo sapiens GN=WDR5 PE=1 SV=1 - [WDR5_HUMAN]                                             |
| P21333            | Filamin-A OS=Homo sapiens GN=FLNA PE=1 SV=4 - [FLNA_HUMAN]                                                                  |
| P62805            | Histone H4 OS=Homo sapiens GN=HIST1H4A PE=1 SV=2 - [H4_HUMAN]                                                               |
| P32119            | Peroxisome protein 2 OS=Homo sapiens GN=PRDX2 PE=1 SV=5 - [PRDX2_HUMAN]                                                     |
| P62195            | 26S protease regulatory subunit 8 OS=Homo sapiens GN=PSMC5 PE=1 SV=1 - [PRS8_HUMAN]                                         |
| Q9BRG1            | Vacuolar protein-sorting-associated protein 25 OS=Homo sapiens GN=VPS25 PE=1 SV=1 - [VPS25_HUMAN]                           |
| P49368            | T-complex protein 1 subunit gamma OS=Homo sapiens GN=CCT3 PE=1 SV=4 - [TCPG_HUMAN]                                          |
| Q00610            | Clathrin heavy chain 1 OS=Homo sapiens GN=CLTC PE=1 SV=5 - [CLH1_HUMAN]                                                     |
| P50151            | Guanine nucleotide-binding protein G(I)/G(S)/G(O) subunit gamma-10 OS=Homo sapiens GN=GNG10 PE=1 SV=1 - [GBG10_HUMAN]       |
| P02794            | Ferritin heavy chain OS=Homo sapiens GN=FTHL1 PE=1 SV=2 - [FRTH_HUMAN]                                                      |
| P62820            | Ras-related protein Rab-1A OS=Homo sapiens GN=RAB1A PE=1 SV=3 - [RAB1A_HUMAN]                                               |
| P78371            | T-complex protein 1 subunit beta OS=Homo sapiens GN=CCT2 PE=1 SV=4 - [TCPB_HUMAN]                                           |
| Q9CZ53            | WD repeat-containing protein 61 OS=Homo sapiens GN=WDR61 PE=1 SV=1 - [WDR61_HUMAN]                                          |
| P19784            | Casein kinase II subunit alpha' OS=Homo sapiens GN=CSNK2A2 PE=1 SV=1 - [CSK22_HUMAN]                                        |
| P51148            | Ras-related protein Rab-5C OS=Homo sapiens GN=RAB5C PE=1 SV=2 - [RAB5C_HUMAN]                                               |
| Q02809            | Procollagen-lysine,2-oxoglutarate 5-dioxygenase 1 OS=Homo sapiens GN=PLOD1 PE=1 SV=2 - [PLOD1_HUMAN]                        |
| 075934            | Pre-mRNA-splicing factor SPF27 OS=Homo sapiens GN=BCAS2 PE=1 SV=1 - [SPF27_HUMAN]                                           |
| P27708            | CAD protein OS=Homo sapiens GN=CAD PE=1 SV=3 - [PYR1_HUMAN]                                                                 |
| Q12905            | Interleukin enhancer-binding factor 2 OS=Homo sapiens GN=ILF2 PE=1 SV=2 - [ILF2_HUMAN]                                      |
| Q9Y265            | RuvB-like 1 OS=Homo sapiens GN=RUVBL1 PE=1 SV=1 - [RUVB1_HUMAN]                                                             |
| Q9Y678            | Coatomer subunit gamma-1 OS=Homo sapiens GN=COPG1 PE=1 SV=1 - [COPG1_HUMAN]                                                 |
| Q9H4G4            | Golgi-associated plant pathogenesis-related protein 1 OS=Homo sapiens GN=GLIPR2 PE=1 SV=3 - [GAPR1_HUMAN]                   |
| Q9Y5K6            | CD2-associated protein OS=Homo sapiens GN=CD2AP PE=1 SV=1 - [CD2AP_HUMAN]                                                   |
| P61106            | Ras-related protein Rab-14 OS=Homo sapiens GN=RAB14 PE=1 SV=4 - [RAB14_HUMAN]                                               |
| P17987            | T-complex protein 1 subunit alpha OS=Homo sapiens GN=TCP1 PE=1 SV=1 - [TCPA_HUMAN]                                          |
| P62701            | 40S ribosomal protein S4, X isoform OS=Homo sapiens GN=RPS4X PE=1 SV=2 - [RS4X_HUMAN]                                       |
| Q9BQ67            | Glutamate-rich WD repeat-containing protein 1 OS=Homo sapiens GN=GRWD1 PE=1 SV=1 - [GRWD1_HUMAN]                            |
| P62140            | Serine/threonine-protein phosphatase PP1-beta catalytic subunit OS=Homo sapiens GN=PPP1CB PE=1 SV=3 - [PP1B_HUMAN]          |

P62942 Peptidyl-prolyl cis-trans isomerase FKBP1A OS=Homo sapiens GN=FKBP1A PE=1 SV=2 - [FKBP1A\_HUMAN]  
P17980 26S protease regulatory subunit 6A OS=Homo sapiens GN=PSMC3 PE=1 SV=3 - [PSR6A\_HUMAN]  
P48643 T-complex protein 1 subunit epsilon OS=Homo sapiens GN=CCT5 PE=1 SV=1 - [TCPE\_HUMAN]  
P28074 Proteasome subunit beta type-5 OS=Homo sapiens GN=PSMB5 PE=1 SV=3 - [PSB5\_HUMAN]  
P18085 ADP-ribosylation factor 4 OS=Homo sapiens GN=ARF4 PE=1 SV=3 - [ARF4\_HUMAN]  
P05388 60S acidic ribosomal protein PO OS=Homo sapiens GN=RPLPO PE=1 SV=1 - [RPLPO\_HUMAN]  
Q8TB73 Protein NDNF OS=Homo sapiens GN=NDNF PE=2 SV=2 - [NDNF\_HUMAN]  
P25789 Proteasome subunit alpha type-4 OS=Homo sapiens GN=PSMA4 PE=1 SV=1 - [PSA4\_HUMAN]  
P00441 Superoxide dismutase [Cu-Zn] OS=Homo sapiens GN=SOD1 PE=1 SV=2 - [SODC\_HUMAN]  
Q9H0U4 Ras-related protein Rab-1B OS=Homo sapiens GN=RAB1B PE=1 SV=1 - [RAB1B\_HUMAN]  
P84095 Rho-related GTP-binding protein RhoG OS=Homo sapiens GN=RHOGE PE=1 SV=1 - [RHOG\_HUMAN]  
P62333 26S protease regulatory subunit 10B OS=Homo sapiens GN=PSMG6 PE=1 SV=1 - [PSR10\_HUMAN]  
P08107 Heat shock 70 kDa protein 1A/1B OS=Homo sapiens GN=HSPA1A PE=1 SV=5 - [HSP71\_HUMAN]  
P61026 Ras-related protein Rab-10 OS=Homo sapiens GN=RAB10 PE=1 SV=1 - [RAB10\_HUMAN]  
P11940 Polyadenylate-binding protein 1 OS=Homo sapiens GN=PABPC1 PE=1 SV=2 - [PABP1\_HUMAN]  
Q15126 Phosphomevalonate kinase OS=Homo sapiens GN=PMVK PE=1 SV=3 - [PMVK\_HUMAN]  
P68036 Ubiquitin-conjugating enzyme E2 L3 OS=Homo sapiens GN=UBE2L3 PE=1 SV=1 - [UB2L3\_HUMAN]  
P22061 Protein-L-isoaspartate(D-aspartate) O-methyltransferase OS=Homo sapiens GN=PCMT1 PE=1 SV=4 - [PMT\_HUMAN]  
O15144 Actin-related protein 2/3 complex subunit 2 OS=Homo sapiens GN=ARPC2 PE=1 SV=1 - [ARPC2\_HUMAN]  
Q92626 Peroxidase homolog OS=Homo sapiens GN=PXDN PE=1 SV=2 - [PXDN\_HUMAN]  
P61006 Ras-related protein Rab-8A OS=Homo sapiens GN=RAB8A PE=1 SV=1 - [RAB8A\_HUMAN]  
P23142 Fibulin-1 OS=Homo sapiens GN=FBLN1 PE=1 SV=4 - [FBLN1\_HUMAN]  
P34897 Serine hydroxymethyltransferase, mitochondrial OS=Homo sapiens GN=SHMT2 PE=1 SV=3 - [GLYM\_HUMAN]  
O14818 Proteasome subunit alpha type-7 OS=Homo sapiens GN=PSMA7 PE=1 SV=1 - [PSA7\_HUMAN]  
P25787 Proteasome subunit alpha type-2 OS=Homo sapiens GN=PSMA2 PE=1 SV=2 - [PSA2\_HUMAN]  
P00736 Complement C1r subcomponent OS=Homo sapiens GN=C1R PE=1 SV=2 - [C1R\_HUMAN]  
P00558 Phosphoglycerate kinase 1 OS=Homo sapiens GN=PGK1 PE=1 SV=3 - [PGK1\_HUMAN]  
P60953 Cell division control protein 42 homolog OS=Homo sapiens GN=CDC42 PE=1 SV=2 - [CDC42\_HUMAN]  
P05386 60S acidic ribosomal protein P1 OS=Homo sapiens GN=RPLP1 PE=1 SV=1 - [RLP1\_HUMAN]  
P11142 Heat shock cognate 71 kDa protein OS=Homo sapiens GN=HSPA8 PE=1 SV=1 - [HSP7C\_HUMAN]  
P29692 Elongation factor 1-delta OS=Homo sapiens GN=EEF1D PE=1 SV=5 - [EF1D\_HUMAN]  
O15372 Eukaryotic translation initiation factor 3 subunit H OS=Homo sapiens GN=EIF3H PE=1 SV=1 - [EIF3H\_HUMAN]  
P54136 Arginine-tRNA ligase, cytoplasmic OS=Homo sapiens GN=RARS PE=1 SV=2 - [SYRC\_HUMAN]  
P23258 Tubulin gamma-1 chain OS=Homo sapiens GN=TUBG1 PE=1 SV=2 - [TGB1\_HUMAN]  
P19105 Myosin regulatory light chain 12A OS=Homo sapiens GN=MYL12A PE=1 SV=2 - [ML12A\_HUMAN]  
Q92499 ATP-dependent RNA helicase DDX1 OS=Homo sapiens GN=DDX1 PE=1 SV=2 - [DDX1\_HUMAN]  
Q61XN9 WD repeat-containing protein 82 OS=Homo sapiens GN=WDR82 PE=1 SV=1 - [WDR82\_HUMAN]  
Q9B178 COP9 signalosome complex subunit 4 OS=Homo sapiens GN=COP4 PE=1 SV=1 - [CNS4\_HUMAN]  
Q9Y224 UPF0568 protein C14orf166 OS=Homo sapiens GN=C14orf166 PE=1 SV=1 - [CN166\_HUMAN]  
P62191 26S protease regulatory subunit 4 OS=Homo sapiens GN=PSMC1 PE=1 SV=1 - [PSR4\_HUMAN]  
Q9HB71 Calyculin-binding protein OS=Homo sapiens GN=CACYPB PE=1 SV=2 - [CYBP\_HUMAN]  
P07741 Adenine phosphoribosyltransferase OS=Homo sapiens GN=APRT PE=1 SV=2 - [APT\_HUMAN]  
P14868 Aspartate-tRNA ligase, cytoplasmic OS=Homo sapiens GN=DARS PE=1 SV=2 - [SYDC\_HUMAN]  
Q96EY5 Multivesicular body subunit 12A OS=Homo sapiens GN=MVB12A PE=1 SV=1 - [MB12A\_HUMAN]  
Q16576 Histone-binding protein RBBP7 OS=Homo sapiens GN=RBBP7 PE=1 SV=1 - [RBBP7\_HUMAN]  
P35625 Metalloproteinase inhibitor 3 OS=Homo sapiens GN=TIMP3 PE=1 SV=2 - [TIMP3\_HUMAN]  
P13693 Translationally-controlled tumor protein OS=Homo sapiens GN=TPT1 PE=1 SV=1 - [TCTP\_HUMAN]  
P08865 40S ribosomal protein SA OS=Homo sapiens GN=RPSA PE=1 SV=4 - [RSSA\_HUMAN]  
Q9Y281 Cofilin-2 OS=Homo sapiens GN=CFL2 PE=1 SV=1 - [COF2\_HUMAN]  
P22234 Multifunctional protein ADE2 OS=Homo sapiens GN=PAICS PE=1 SV=3 - [PUR6\_HUMAN]  
O43405 Cochlin OS=Homo sapiens GN=COCH PE=1 SV=1 - [COCH\_HUMAN]  
P05198 Eukaryotic translation initiation factor 2 subunit 1 OS=Homo sapiens GN=EIF2S1 PE=1 SV=3 - [IF2A\_HUMAN]  
Q15286 Ras-related protein Rab-35 OS=Homo sapiens GN=RAB35 PE=1 SV=1 - [RAB35\_HUMAN]  
O00303 Eukaryotic translation initiation factor 3 subunit F OS=Homo sapiens GN=EIF3F PE=1 SV=1 - [EIF3F\_HUMAN]  
Q9UN37 Vacuolar protein sorting-associated protein 4A OS=Homo sapiens GN=VPS4A PE=1 SV=1 - [VPS4A\_HUMAN]  
P43034 Platelet-activating factor acetylhydrolase 1B subunit alpha OS=Homo sapiens GN=PAFAH1B1 PE=1 SV=2 - [LTS1\_HUMAN]  
Q75531 Barrier-to-autointegration factor OS=Homo sapiens GN=BANF1 PE=1 SV=1 - [BAF\_HUMAN]  
Q15008 26S proteasome non-ATPase regulatory subunit 6 OS=Homo sapiens GN=PSMD6 PE=1 SV=1 - [PSMD6\_HUMAN]  
P00750 Tissue-type plasminogen activator OS=Homo sapiens GN=PLAT PE=1 SV=1 - [TPA\_HUMAN]  
P61313 60S ribosomal protein L15 OS=Homo sapiens GN=RPL15 PE=1 SV=2 - [RL15\_HUMAN]  
O00487 26S proteasome non-ATPase regulatory subunit 14 OS=Homo sapiens GN=PSMD14 PE=1 SV=1 - [PSDE\_HUMAN]  
Q7L5N1 COP9 signalosome complex subunit 6 OS=Homo sapiens GN=COPS6 PE=1 SV=1 - [CSN6\_HUMAN]  
P49247 Ribose-5-phosphate isomerase OS=Homo sapiens GN=RPIA PE=1 SV=3 - [RPIA\_HUMAN]  
Q13162 Peroxiredoxin-4 OS=Homo sapiens GN=PRDX4 PE=1 SV=1 - [PRDX4\_HUMAN]  
Q90928 Histone-binding protein RBBP4 OS=Homo sapiens GN=RBBP4 PE=1 SV=3 - [RBBP4\_HUMAN]  
Q15113 Procollagen C-endopeptidase enhancer 1 OS=Homo sapiens GN=PCOLCE PE=1 SV=2 - [PCOC1\_HUMAN]  
P25398 40S ribosomal protein S12 OS=Homo sapiens GN=RPS12 PE=1 SV=3 - [RS12\_HUMAN]  
Q9NQ74 Exosome complex component RRP46 OS=Homo sapiens GN=EXOSC5 PE=1 SV=1 - [EXOS5\_HUMAN]  
P60842 Eukaryotic translation initiation factor 4A-1 OS=Homo sapiens GN=EIF4A1 PE=1 SV=1 - [IF4A1\_HUMAN]  
Q9Y230 RuvB-like 2 OS=Homo sapiens GN=RUVBL2 PE=1 SV=3 - [RUVB2\_HUMAN]  
P28070 Proteasome subunit beta type-4 OS=Homo sapiens GN=PSMB4 PE=1 SV=4 - [PSB4\_HUMAN]  
P61204 ADP-ribosylation factor 3 OS=Homo sapiens GN=ARF3 PE=1 SV=2 - [ARF3\_HUMAN]  
P62873 Guanine nucleotide-binding protein G(I)/G(S)/G(T) subunit beta-1 OS=Homo sapiens GN=GNB1 PE=1 SV=3 - [GGB1\_HUMAN]  
P62879 Guanine nucleotide-binding protein G(I)/G(S)/G(T) subunit beta-2 OS=Homo sapiens GN=GNB2 PE=1 SV=3 - [GGB2\_HUMAN]  
P62249 40S ribosomal protein S16 OS=Homo sapiens GN=RPS16 PE=1 SV=2 - [RS16\_HUMAN]  
P52292 Importin subunit alpha-1 OS=Homo sapiens GN=KPN2 PE=1 SV=1 - [IMA1\_HUMAN]  
P07093 Glia-derived nexin OS=Homo sapiens GN=SERPINE2 PE=1 SV=1 - [GDN\_HUMAN]  
P01111 GTPase Nras OS=Homo sapiens GN=NRAS PE=1 SV=1 - [RAS\_N\_HUMAN]  
P53618 Coatamer subunit beta OS=Homo sapiens GN=COPB1 PE=1 SV=3 - [COPB\_HUMAN]  
P00055 Histone H2A.Z OS=Homo sapiens GN=H2AFZ PE=1 SV=2 - [H2AZ\_HUMAN]  
P33992 DNA replication licensing factor MCM5 OS=Homo sapiens GN=MCM5 PE=1 SV=5 - [MCM5\_HUMAN]  
P61247 40S ribosomal protein S3a OS=Homo sapiens GN=RPS3A PE=1 SV=2 - [RS3A\_HUMAN]  
Q9HCE1 Putative helicase MOV-10 OS=Homo sapiens GN=MOV10 PE=1 SV=2 - [MOV10\_HUMAN]  
Q15369 Transcription elongation factor B polypeptide 1 OS=Homo sapiens GN=TCEB1 PE=1 SV=1 - [ELOC\_HUMAN]  
Q08380 Galectin-3-binding protein OS=Homo sapiens GN=LGALS3BP PE=1 SV=1 - [LG3BP\_HUMAN]  
P16152 Carboxyl reductase [NADPH] 1 OS=Homo sapiens GN=CBR1 PE=1 SV=3 - [CBR1\_HUMAN]  
P37802 Transgelin-2 OS=Homo sapiens GN=TAGLN2 PE=1 SV=3 - [TAGL2\_HUMAN]  
Q969P0 Immunoglobulin superfamily member 8 OS=Homo sapiens GN=IGSF8 PE=1 SV=1 - [IGSF8\_HUMAN]  
P01033 Metalloproteinase inhibitor 1 OS=Homo sapiens GN=TIMP1 PE=1 SV=1 - [TIMP1\_HUMAN]  
P21281 V-type proton ATPase subunit B, brain isoform OS=Homo sapiens GN=ATP6V1B2 PE=1 SV=3 - [VATB2\_HUMAN]  
P61353 60S ribosomal protein L27 OS=Homo sapiens GN=RPL27 PE=1 SV=2 - [RL27\_HUMAN]  
Q15019 Septin-2 OS=Homo sapiens GN=SEPT2 PE=1 SV=1 - [SEPT2\_HUMAN]  
P33991 DNA replication licensing factor MCM4 OS=Homo sapiens GN=MCM4 PE=1 SV=5 - [MCM4\_HUMAN]  
P08758 Annexin A5 OS=Homo sapiens GN=ANXA5 PE=1 SV=2 - [ANXA5\_HUMAN]  
P13639 Elongation factor 2 OS=Homo sapiens GN=EEF2 PE=1 SV=4 - [EF2\_HUMAN]  
Q81UL8 Cartilage intermediate layer protein 2 OS=Homo sapiens GN=CILP2 PE=2 SV=2 - [CILP2\_HUMAN]  
P22102 Trifunctional purine biosynthetic protein adenosine-3 OS=Homo sapiens GN=GART PE=1 SV=1 - [PUR2\_HUMAN]  
Q9BKX5 AP-1 complex subunit mu-1 OS=Homo sapiens GN=AP1M1 PE=1 SV=3 - [AP1M1\_HUMAN]  
Q16531 DNA damage-binding protein 1 OS=Homo sapiens GN=DDB1 PE=1 SV=1 - [DDB1\_HUMAN]  
P10599 Thioredoxin OS=Homo sapiens GN=TXN PE=1 SV=3 - [THIO\_HUMAN]  
Q75340 Programmed cell death protein 6 OS=Homo sapiens GN=PCDC6 PE=1 SV=1 - [PCDC6\_HUMAN]  
P24941 Cyclin-dependent kinase 2 OS=Homo sapiens GN=CDK2 PE=1 SV=2 - [CDK2\_HUMAN]  
P62913 60S ribosomal protein L11 OS=Homo sapiens GN=RPL11 PE=1 SV=2 - [RL11\_HUMAN]  
Q12906 Interleukin enhancer-binding factor 3 OS=Homo sapiens GN=ILF3 PE=1 SV=3 - [ILF3\_HUMAN]  
P30041 Peroxiredoxin-6 OS=Homo sapiens GN=PRDX6 PE=1 SV=3 - [PRDX6\_HUMAN]  
P46777 60S ribosomal protein L5 OS=Homo sapiens GN=RPL5 PE=1 SV=3 - [RL5\_HUMAN]  
Q43684 Mitotic checkpoint protein BUB3 OS=Homo sapiens GN=BUB3 PE=1 SV=1 - [BUB3\_HUMAN]  
P11047 Laminin subunit gamma-1 OS=Homo sapiens GN=LAMC1 PE=1 SV=3 - [LAMC1\_HUMAN]  
P78539 Sushi repeat-containing protein SRPX OS=Homo sapiens GN=SRPX PE=1 SV=1 - [SRPX\_HUMAN]  
P04792 Heat shock protein beta-1 OS=Homo sapiens GN=HSPB1 PE=1 SV=2 - [HSPB1\_HUMAN]  
Q93009 Ubiquitin carboxyl-terminal hydrolase 7 OS=Homo sapiens GN=USP7 PE=1 SV=2 - [UBP7\_HUMAN]  
P08238 Heat shock protein HSP 90-beta OS=Homo sapiens GN=HSP90AB1 PE=1 SV=4 - [HS90B\_HUMAN]  
Q99417 C-Myc-binding protein OS=Homo sapiens GN=MYCBP PE=1 SV=3 - [MYCBP\_HUMAN]  
P27348 14-3-3 protein theta OS=Homo sapiens GN=YWHAQ PE=1 SV=1 - [1433T\_HUMAN]  
Q9UBQ5 Eukaryotic translation initiation factor 3 subunit K OS=Homo sapiens GN=EIF3K PE=1 SV=1 - [EIF3K\_HUMAN]

Q7L2H7 Eukaryotic translation initiation factor 3 subunit M OS=Homo sapiens GN=EIF3M PE=1 SV=1 - [EIF3M\_HUMAN]  
P22392 Nucleoside diphosphate kinase B OS=Homo sapiens GN=NME2 PE=1 SV=1 - [NDKB\_HUMAN]  
P98160 Basement membrane-specific heparan sulfate proteoglycan core protein OS=Homo sapiens GN=HSPG2 PE=1 SV=4 - [PGBM\_HUMAN]  
Q9BR82 Thioredoxin domain-containing protein 17 OS=Homo sapiens GN=TXNDC17 PE=1 SV=1 - [TXD17\_HUMAN]  
Q15181 Inorganic pyrophosphatase OS=Homo sapiens GN=PPA1 PE=1 SV=2 - [IPYR\_HUMAN]  
P11802 Cyclin-dependent kinase 4 OS=Homo sapiens GN=CDK4 PE=1 SV=2 - [CDK4\_HUMAN]  
Q9UBB4 Ataxin-10 OS=Homo sapiens GN=ATXN10 PE=1 SV=1 - [ATX10\_HUMAN]  
Q9Y3F4 Serine-threonine kinase receptor-associated protein OS=Homo sapiens GN=STRAP PE=1 SV=1 - [STRAP\_HUMAN]  
P07814 Bifunctional glutamate/proline--tRNA ligase OS=Homo sapiens GN=EPRS PE=1 SV=5 - [SYEP\_HUMAN]  
Q14204 Cytoplasmic dynein 1 heavy chain 1 OS=Homo sapiens GN=DYNC1H1 PE=1 SV=5 - [DYHC1\_HUMAN]  
P61513 60S ribosomal protein L37a OS=Homo sapiens GN=RPL37A PE=1 SV=2 - [RL37A\_HUMAN]  
P46782 40S ribosomal protein S5 OS=Homo sapiens GN=RPS5 PE=1 SV=4 - [RS5\_HUMAN]  
Q9Y2T2 AP-3 complex subunit mu-1 OS=Homo sapiens GN=AP3M1 PE=1 SV=1 - [AP3M1\_HUMAN]  
Q8WUD1 Ras-related protein Rab-2B OS=Homo sapiens GN=RAB2B PE=1 SV=1 - [RAB2B\_HUMAN]  
Q7K7U0 PHD finger-like domain-containing protein 5A OS=Homo sapiens GN=PHF5A PE=1 SV=1 - [PHF5A\_HUMAN]  
Q00535 Cyclin-dependent-like kinase 5 OS=Homo sapiens GN=CDK5 PE=1 SV=3 - [CDK5\_HUMAN]  
P26639 Threonine--tRNA ligase, cytoplasmic OS=Homo sapiens GN=TARS PE=1 SV=3 - [SYTC\_HUMAN]  
Q13561 Dynactin subunit 2 OS=Homo sapiens GN=DCTN2 PE=1 SV=4 - [DCTN2\_HUMAN]  
P23526 Adenosylhomocysteinase OS=Homo sapiens GN=AHCY PE=1 SV=4 - [SAHH\_HUMAN]  
Q13509 Tubulin beta-3 chain OS=Homo sapiens GN=TUBB3 PE=1 SV=2 - [TBB3\_HUMAN]  
Q9UJW0 Dynactin subunit 4 OS=Homo sapiens GN=DCTN4 PE=1 SV=1 - [DCTN4\_HUMAN]  
P68400 Casein kinase II subunit alpha OS=Homo sapiens GN=CSNK2A1 PE=1 SV=1 - [CSK21\_HUMAN]  
Q43242 26S proteasome non-ATPase regulatory subunit 3 OS=Homo sapiens GN=PSMD3 PE=1 SV=2 - [PSMD3\_HUMAN]  
F52907 F-actin-capping protein subunit alpha-1 OS=Homo sapiens GN=CAPZA1 PE=1 SV=3 - [CAZAL\_HUMAN]  
Q75083 WD repeat-containing protein 1 OS=Homo sapiens GN=WDR1 PE=1 SV=4 - [WDR1\_HUMAN]  
P28072 Proteasome subunit beta type-6 OS=Homo sapiens GN=PSMB6 PE=1 SV=4 - [PSB6\_HUMAN]  
Q81252 Chondroitin sulfate synthase 2 OS=Homo sapiens GN=CHPF PE=1 SV=2 - [CHSS2\_HUMAN]  
P30626 Sorcin OS=Homo sapiens GN=SRI PE=1 SV=1 - [SORCN\_HUMAN]  
Q99536 Synaptic vesicle membrane protein VAT-1 homolog OS=Homo sapiens GN=VAT1 PE=1 SV=2 - [VAT1\_HUMAN]  
P11586 C-1-tetrahydrofolate synthase, cytoplasmic OS=Homo sapiens GN=MTHFD1 PE=1 SV=3 - [C1TC\_HUMAN]  
P20618 Proteasome subunit beta type-1 OS=Homo sapiens GN=PSMB1 PE=1 SV=2 - [PSB1\_HUMAN]  
Q7KZ4F Staphylococcal nuclease domain-containing protein 1 OS=Homo sapiens GN=SDN1 PE=1 SV=1 - [SDN1\_HUMAN]  
P63267 Actin, gamma-enteric smooth muscle OS=Homo sapiens GN=ACTG2 PE=1 SV=1 - [ACTH\_HUMAN]  
Q9Y629 Cytoplasmic dynein 1 light intermediate chain 1 OS=Homo sapiens GN=DYNC1L1 PE=1 SV=3 - [DCL1L1\_HUMAN]  
P07900 Heat shock protein HSP 90-alpha OS=Homo sapiens GN=HSP90AA1 PE=1 SV=5 - [HS90A\_HUMAN]  
P41567 Eukaryotic translation initiation factor 1 OS=Homo sapiens GN=EIF1 PE=1 SV=1 - [EIF1\_HUMAN]  
P19388 DNA-directed RNA polymerases I, II, and III subunit RPABC1 OS=Homo sapiens GN=POLR2E PE=1 SV=4 - [RPAB1\_HUMAN]  
P63010 AP-2 complex subunit beta OS=Homo sapiens GN=AP2B1 PE=1 SV=1 - [AP2B1\_HUMAN]  
Q86YQ8 Copine-8 OS=Homo sapiens GN=CPNE8 PE=1 SV=2 - [CPNE8\_HUMAN]  
Q14166 Tubulin--tyrosine ligase-like protein 12 OS=Homo sapiens GN=TTLL12 PE=1 SV=2 - [TTL12\_HUMAN]  
P06576 ATP synthase subunit beta, mitochondrial OS=Homo sapiens GN=ATP5B PE=1 SV=3 - [ATP5B\_HUMAN]  
P06733 Alpha-enolase OS=Homo sapiens GN=ENO1 PE=1 SV=2 - [ENOA\_HUMAN]  
Q86X83 COMM domain-containing protein 2 OS=Homo sapiens GN=COMM2 PE=1 SV=2 - [COMM2\_HUMAN]  
O75436 Vacuolar protein sorting-associated protein 26A OS=Homo sapiens GN=VPS26A PE=1 SV=2 - [VP26A\_HUMAN]  
P01112 GTPase Hras OS=Homo sapiens GN=HRAS PE=1 SV=1 - [RASH\_HUMAN]  
Q9UFG5 UPP4049 protein C19orf25 OS=Homo sapiens GN=C19orf25 PE=1 SV=2 - [CSO25\_HUMAN]  
P41252 Isoleucine--tRNA ligase, cytoplasmic OS=Homo sapiens GN=IARS PE=1 SV=2 - [SYTC\_HUMAN]  
P21796 Voltage-dependent anion-selective channel protein 1 OS=Homo sapiens GN=VDAC1 PE=1 SV=2 - [VDAC1\_HUMAN]  
Q14112 Nidogen-2 OS=Homo sapiens GN=NID2 PE=1 SV=3 - [NID2\_HUMAN]  
P26038 Moesin OS=Homo sapiens GN=MSN PE=1 SV=3 - [MOES\_HUMAN]  
P39019 40S ribosomal protein S19 OS=Homo sapiens GN=RPS19 PE=1 SV=2 - [RS19\_HUMAN]  
P62266 40S ribosomal protein S23 OS=Homo sapiens GN=RPS23 PE=1 SV=3 - [RS23\_HUMAN]  
Q93063 Exostosin-2 OS=Homo sapiens GN=EXT2 PE=1 SV=1 - [EXT2\_HUMAN]  
F54577 Tyrosine--tRNA ligase, cytoplasmic OS=Homo sapiens GN=YARS PE=1 SV=4 - [SYTC\_HUMAN]  
P62993 Growth factor receptor-bound protein 2 OS=Homo sapiens GN=GRB2 PE=1 SV=1 - [GRB2\_HUMAN]  
Q14232 Translation initiation factor eIF-2B subunit alpha OS=Homo sapiens GN=EIF2B1 PE=1 SV=1 - [E12BA\_HUMAN]  
P07355 Annexin A2 OS=Homo sapiens GN=ANXA2 PE=1 SV=2 - [ANXA2\_HUMAN]  
P61163 Alpha-actinin OS=Homo sapiens GN=ACTR1A PE=1 SV=1 - [ACTZ\_HUMAN]  
Q15366 Poly(rC)-binding protein 2 OS=Homo sapiens GN=PCBP2 PE=1 SV=1 - [PCBP2\_HUMAN]  
F51665 26S proteasome non-ATPase regulatory subunit 7 OS=Homo sapiens GN=PSMD7 PE=1 SV=2 - [PSMD7\_HUMAN]  
P63000 Ras-related C3 botulinum toxin substrate 1 OS=Homo sapiens GN=RAC1 PE=1 SV=1 - [RAC1\_HUMAN]  
Q9UKZ9 Procollagen C-endopeptidase enhancer 2 OS=Homo sapiens GN=PCOLCE2 PE=1 SV=1 - [PCOC2\_HUMAN]  
O14579 Coatomer subunit epsilon OS=Homo sapiens GN=COPE PE=1 SV=3 - [COPE\_HUMAN]  
Q99436 Proteasome subunit beta type-7 OS=Homo sapiens GN=PSMB7 PE=1 SV=1 - [PSB7\_HUMAN]  
P35556 Fibrillin-2 OS=Homo sapiens GN=FBN2 PE=1 SV=3 - [FBN2\_HUMAN]  
P22314 Ubiquitin-like modifier-activating enzyme 1 OS=Homo sapiens GN=UBA1 PE=1 SV=3 - [UBA1\_HUMAN]  
Q92900 Regulator of nonsense transcripts 1 OS=Homo sapiens GN=UPF1 PE=1 SV=2 - [RENT1\_HUMAN]  
O00299 Chloride intracellular channel protein 1 OS=Homo sapiens GN=CLIC1 PE=1 SV=4 - [CLIC1\_HUMAN]  
P42771 Cyclin-dependent kinase inhibitor 2A OS=Homo sapiens GN=CDKN2A PE=1 SV=2 - [CDN2A\_HUMAN]  
Q43809 Cleavage and polyadenylation specificity factor subunit 5 OS=Homo sapiens GN=NUDT21 PE=1 SV=1 - [CPSF5\_HUMAN]  
Q9Y3B4 Splicing factor 3B subunit 6 OS=Homo sapiens GN=SF3B6 PE=1 SV=1 - [SF3B6\_HUMAN]  
P10809 60 kDa heat shock protein, mitochondrial OS=Homo sapiens GN=HSPD1 PE=1 SV=2 - [CH60\_HUMAN]  
O00161 Synaptoosomal-associated protein 23 OS=Homo sapiens GN=SNAP23 PE=1 SV=1 - [SNP23\_HUMAN]  
Q13813 Spectrin alpha chain, non-erythrocytic 1 OS=Homo sapiens GN=SPTAN1 PE=1 SV=3 - [SPTN1\_HUMAN]  
Q15393 Splicing factor 3B subunit 3 OS=Homo sapiens GN=SF3B3 PE=1 SV=4 - [SF3B3\_HUMAN]  
O00148 ATP-dependent RNA helicase DDX39A OS=Homo sapiens GN=DDX39A PE=1 SV=2 - [DX39A\_HUMAN]  
P46063 ATP-dependent DNA helicase Q1 OS=Homo sapiens GN=RECQL PE=1 SV=3 - [RECQ1\_HUMAN]  
Q9H223 EH domain-containing protein 4 OS=Homo sapiens GN=EHD4 PE=1 SV=1 - [EHD4\_HUMAN]  
P08134 Rho-related GTP-binding protein RhoC OS=Homo sapiens GN=RHO C PE=1 SV=1 - [RHO C\_HUMAN]  
P14854 Cytochrome c oxidase subunit 6B1 OS=Homo sapiens GN=COX6B1 PE=1 SV=2 - [CX6B1\_HUMAN]  
Q9NZN3 EH domain-containing protein 3 OS=Homo sapiens GN=EHD3 PE=1 SV=2 - [EHD3\_HUMAN]  
P62158 Calmodulin OS=Homo sapiens GN=CALM1 PE=1 SV=2 - [CALM\_HUMAN]  
P39023 60S ribosomal protein L3 OS=Homo sapiens GN=RPL3 PE=1 SV=2 - [RL3\_HUMAN]  
Q15029 116 kDa U5 small nuclear ribonucleoprotein component OS=Homo sapiens GN=EFTUD2 PE=1 SV=1 - [U5S1\_HUMAN]  
P59998 Actin-related protein 2/3 complex subunit 4 OS=Homo sapiens GN=ARPC4 PE=1 SV=3 - [ARPC4\_HUMAN]  
P62318 Small nuclear ribonucleoprotein Sm D3 OS=Homo sapiens GN=SNRNP3 PE=1 SV=1 - [SMD3\_HUMAN]  
P61158 Actin-related protein 3 OS=Homo sapiens GN=ACTR3 PE=1 SV=3 - [ARP3\_HUMAN]  
Q06210 Glutamine--fructose-6-phosphate aminotransferase [isomerizing] 1 OS=Homo sapiens GN=GFPT1 PE=1 SV=3 - [GFPT1\_HUMAN]  
P24666 Low molecular weight phosphotyrosine protein phosphatase OS=Homo sapiens GN=ACP1 PE=1 SV=3 - [PPAC\_HUMAN]  
P62316 Small nuclear ribonucleoprotein Sm D2 OS=Homo sapiens GN=SNRNP2 PE=1 SV=1 - [SMD2\_HUMAN]  
O00151 PDZ and LIM domain protein 1 OS=Homo sapiens GN=PDLIM1 PE=1 SV=4 - [PDL1\_HUMAN]  
P49588 Alanine--tRNA ligase, cytoplasmic OS=Homo sapiens GN=AARS PE=1 SV=2 - [SYAC\_HUMAN]  
P32969 60S ribosomal protein L9 OS=Homo sapiens GN=RPL9 PE=1 SV=1 - [RL9\_HUMAN]  
O00232 26S proteasome non-ATPase regulatory subunit 12 OS=Homo sapiens GN=PSMD12 PE=1 SV=3 - [PSD12\_HUMAN]  
P40937 Replication factor C subunit 5 OS=Homo sapiens GN=RFC5 PE=1 SV=1 - [RFC5\_HUMAN]  
P30101 Protein disulfide-isomerase A3 OS=Homo sapiens GN=PDIA3 PE=1 SV=4 - [PDIA3\_HUMAN]  
P30050 60S ribosomal protein L12 OS=Homo sapiens GN=RPL12 PE=1 SV=1 - [RL12\_HUMAN]  
P08243 Asparagine synthetase [glutamine-hydrolyzing] OS=Homo sapiens GN=ASNS PE=1 SV=4 - [ASNS\_HUMAN]  
Q53E24 Centrosomal protein of 55 kDa OS=Homo sapiens GN=CEP55 PE=1 SV=3 - [CEP55\_HUMAN]  
P60228 Eukaryotic translation initiation factor 3 subunit E OS=Homo sapiens GN=EIF3E PE=1 SV=1 - [EIF3E\_HUMAN]  
Q9UNF0 Protein kinase C and casein kinase substrate in neurons protein 2 OS=Homo sapiens GN=PACSN2 PE=1 SV=2 - [PACN2\_HUMAN]  
P24534 Elongation factor 1-beta OS=Homo sapiens GN=EEF1B2 PE=1 SV=3 - [EF1B\_HUMAN]  
Q8N1F7 Nuclear pore complex protein Nup93 OS=Homo sapiens GN=NUP93 PE=1 SV=2 - [NUP93\_HUMAN]  
Q9H444 Charged multivesicular body protein 4b OS=Homo sapiens GN=CHMP4B PE=1 SV=1 - [CHM4B\_HUMAN]  
P42025 Beta-centractin OS=Homo sapiens GN=ACTR1B PE=1 SV=1 - [ACTY\_HUMAN]  
F51153 Ras-related protein Rab-13 OS=Homo sapiens GN=RAB13 PE=1 SV=1 - [RAB13\_HUMAN]  
F50395 Rab GDP dissociation inhibitor beta OS=Homo sapiens GN=GDID2 PE=1 SV=2 - [GDIB\_HUMAN]  
Q9BZM4 NKG2D ligand 3 OS=Homo sapiens GN=ULBP3 PE=1 SV=1 - [ND2L3\_HUMAN]  
Q95782 AP-2 complex subunit alpha-1 OS=Homo sapiens GN=AP2A1 PE=1 SV=3 - [AP2A1\_HUMAN]  
P17858 ATP-dependent 6-phosphofruktokinase, liver type OS=Homo sapiens GN=PFKL PE=1 SV=6 - [PFKAL\_HUMAN]  
Q8WV92 MIT domain-containing protein 1 OS=Homo sapiens GN=MITD1 PE=1 SV=1 - [MITD1\_HUMAN]  
Q94776 Metastasis-associated protein MTA2 OS=Homo sapiens GN=MTA2 PE=1 SV=1 - [MTA2\_HUMAN]  
Q9VDF9 Heat shock 70 kDa protein 14 OS=Homo sapiens GN=HSPA14 PE=1 SV=1 - [HSP7E\_HUMAN]  
Q99497 Protein deglycase DJ-1 OS=Homo sapiens GN=PARK7 PE=1 SV=2 - [PARK7\_HUMAN]  
Q9UHI8 A disintegrin and metalloproteinase with thrombospondin motifs 1 OS=Homo sapiens GN=ADAMTS1 PE=1 SV=4 - [ATS1\_HUMAN]

Q9NWU2 Glucose-induced degradation protein 8 homolog OS=Homo sapiens GN=GID8 PE=1 SV=1 - [GID8\_HUMAN]  
015498 Synaptobrevin homolog YKT6 OS=Homo sapiens GN=YKT6 PE=1 SV=1 - [YKT6\_HUMAN]  
P61289 Proteasome activator complex subunit 3 OS=Homo sapiens GN=PSME3 PE=1 SV=1 - [PSME3\_HUMAN]  
Q9UKS6 Protein kinase C and casein kinase substrate in neurons protein 3 OS=Homo sapiens GN=PACSIN3 PE=1 SV=2 - [PACSIN3\_HUMAN]  
Q9HHH4 Vacuolar protein sorting-associated protein 37B OS=Homo sapiens GN=VPS37B PE=1 SV=1 - [VPS37B\_HUMAN]  
Q9Y295 Developmentally-regulated GTP-binding protein 1 OS=Homo sapiens GN=DRG1 PE=1 SV=1 - [DRG1\_HUMAN]  
Q16394 Exostosin-1 OS=Homo sapiens GN=EXT1 PE=1 SV=2 - [EXT1\_HUMAN]  
P38919 Eukaryotic initiation factor 4A-III OS=Homo sapiens GN=EIF4A3 PE=1 SV=4 - [EIF4A3\_HUMAN]  
P60891 Ribose-phosphate pyrophosphokinase 1 OS=Homo sapiens GN=PRPS1 PE=1 SV=2 - [PRPS1\_HUMAN]  
000391 Sulfhydryl oxidase 1 OS=Homo sapiens GN=QSOX1 PE=1 SV=3 - [QSOX1\_HUMAN]  
P62241 40S ribosomal protein S8 OS=Homo sapiens GN=RPS8 PE=1 SV=2 - [RPS8\_HUMAN]  
Q9UBQ0 Vacuolar protein sorting-associated protein 29 OS=Homo sapiens GN=VPS29 PE=1 SV=1 - [VPS29\_HUMAN]  
P25391 Laminin subunit alpha-1 OS=Homo sapiens GN=LAMA1 PE=1 SV=2 - [LAMA1\_HUMAN]  
P84085 ADP-ribosylation factor 5 OS=Homo sapiens GN=ARF5 PE=1 SV=2 - [ARF5\_HUMAN]  
Q96586 Hyaluronan and proteoglycan link protein 3 OS=Homo sapiens GN=HAPLN3 PE=2 SV=1 - [HPLN3\_HUMAN]  
P11021 78 kDa glucose-regulated protein OS=Homo sapiens GN=HSPA5 PE=1 SV=2 - [GRP78\_HUMAN]  
P04083 Annexin A1 OS=Homo sapiens GN=ANXA1 PE=1 SV=2 - [ANXA1\_HUMAN]  
Q9Y310 tRNA-splicing ligase RtcB homolog OS=Homo sapiens GN=RTCB PE=1 SV=1 - [RTCB\_HUMAN]  
P13010 X-ray repair cross-complementing protein 5 OS=Homo sapiens GN=XRCC5 PE=1 SV=3 - [XRCC5\_HUMAN]  
P62081 40S ribosomal protein S7 OS=Homo sapiens GN=RPS7 PE=1 SV=1 - [RPS7\_HUMAN]  
P18754 Regulator of chromosome condensation OS=Homo sapiens GN=RCC1 PE=1 SV=1 - [RCC1\_HUMAN]  
Q9P258 Protein RCC2 OS=Homo sapiens GN=RCC2 PE=1 SV=2 - [RCC2\_HUMAN]  
P61221 ATP-binding cassette sub-family E member 1 OS=Homo sapiens GN=ABCE1 PE=1 SV=1 - [ABCE1\_HUMAN]  
Q53HC9 Protein TSSC1 OS=Homo sapiens GN=TSSC1 PE=1 SV=2 - [TSSC1\_HUMAN]  
P63104 14-3-3 protein zeta/delta OS=Homo sapiens GN=YWHAZ PE=1 SV=1 - [1433Z\_HUMAN]  
P36578 60S ribosomal protein L4 OS=Homo sapiens GN=RPL4 PE=1 SV=5 - [RL4\_HUMAN]  
Q9P2J5 Leucine--tRNA ligase, cytoplasmic OS=Homo sapiens GN=LARS PE=1 SV=2 - [SYLC\_HUMAN]  
Q9UB11 COMM domain-containing protein 3 OS=Homo sapiens GN=COMMD3 PE=1 SV=1 - [COMD3\_HUMAN]  
075821 Eukaryotic translation initiation factor 3 subunit G OS=Homo sapiens GN=EIF3G PE=1 SV=2 - [EIF3G\_HUMAN]  
075131 Copine-3 OS=Homo sapiens GN=CPNE3 PE=1 SV=1 - [CPNE3\_HUMAN]  
Q53H96 Pyrroline-5-carboxylate reductase 3 OS=Homo sapiens GN=PYCR1 PE=1 SV=3 - [P5CR3\_HUMAN]  
P62280 40S ribosomal protein S11 OS=Homo sapiens GN=RPS11 PE=1 SV=3 - [RS11\_HUMAN]  
P07942 Laminin subunit beta-1 OS=Homo sapiens GN=LAMB1 PE=1 SV=2 - [LAMB1\_HUMAN]  
P08754 Guanine nucleotide-binding protein (G) subunit alpha OS=Homo sapiens GN=GNA13 PE=1 SV=3 - [GNA13\_HUMAN]  
Q9Y559 RNA-binding protein 8A OS=Homo sapiens GN=RBM8A PE=1 SV=1 - [RBM8A\_HUMAN]  
P10768 S-formylglutathione hydrolase OS=Homo sapiens GN=ESD PE=1 SV=2 - [ESTD\_HUMAN]  
Q96K80 Zinc finger CCH domain-containing protein 10 OS=Homo sapiens GN=ZC3H10 PE=1 SV=1 - [ZC3HA\_HUMAN]  
Q9BTV5 Fibronectin type III and SPRY domain-containing protein 1 OS=Homo sapiens GN=PSD1 PE=1 SV=1 - [PSD1\_HUMAN]  
Q01082 Spectrin beta chain, non-erythrocytic 1 OS=Homo sapiens GN=SPTBN1 PE=1 SV=2 - [SPTB2\_HUMAN]  
P35268 60S ribosomal protein L22 OS=Homo sapiens GN=RPL22 PE=1 SV=2 - [RL22\_HUMAN]  
Q9P2B2 Prostaglandin F2 receptor negative regulator OS=Homo sapiens GN=PTGFRN PE=1 SV=2 - [FPRP\_HUMAN]  
P40926 Malate dehydrogenase, mitochondrial OS=Homo sapiens GN=MDH2 PE=1 SV=3 - [MDHM\_HUMAN]  
P30876 DNA-directed RNA polymerase II subunit RPB2 OS=Homo sapiens GN=POLR2B PE=1 SV=1 - [RPB2\_HUMAN]  
Q9Y296 Trafficking protein particle complex subunit 4 OS=Homo sapiens GN=TRAPP4 PE=1 SV=1 - [TPPC4\_HUMAN]  
Q08211 ATP-dependent RNA helicase A OS=Homo sapiens GN=DHX9 PE=1 SV=4 - [DHX9\_HUMAN]  
P11766 Alcohol dehydrogenase class-3 OS=Homo sapiens GN=ADH5 PE=1 SV=4 - [ADH5\_HUMAN]  
P49643 DNA primase large subunit OS=Homo sapiens GN=PRIM2 PE=1 SV=2 - [PR12\_HUMAN]  
000571 ATP-dependent RNA helicase DDX3X OS=Homo sapiens GN=DDX3X PE=1 SV=3 - [DDX3X\_HUMAN]  
Q14141 Septin-6 OS=Homo sapiens GN=SEPT6 PE=1 SV=4 - [SEPT6\_HUMAN]  
P12268 Inosine-5'-monophosphate dehydrogenase 2 OS=Homo sapiens GN=IMPDH2 PE=1 SV=2 - [IMDH2\_HUMAN]  
P26022 Pentraxin-related protein PTX3 OS=Homo sapiens GN=PTX3 PE=1 SV=3 - [PTX3\_HUMAN]  
P25325 3-mercaptopurinate sulfoxidase OS=Homo sapiens GN=MPST PE=1 SV=3 - [THTM\_HUMAN]  
Q9Y2L1 Exosome complex exonuclease RRP44 OS=Homo sapiens GN=DIS3 PE=1 SV=2 - [RRP44\_HUMAN]  
Q92572 AP-3 complex subunit sigma-1 OS=Homo sapiens GN=AP3S1 PE=1 SV=1 - [AP3S1\_HUMAN]  
Q13263 Transcription intermediary factor 1-beta OS=Homo sapiens GN=TRIM28 PE=1 SV=5 - [TIF1B\_HUMAN]  
Q99460 26S proteasome non-ATPase regulatory subunit 1 OS=Homo sapiens GN=PSMD1 PE=1 SV=2 - [PSMD1\_HUMAN]  
Q8NPH3 Nucleoporin Nup43 OS=Homo sapiens GN=NUP43 PE=1 SV=1 - [NUP43\_HUMAN]  
P49720 Proteasome subunit beta type-3 OS=Homo sapiens GN=PSMB3 PE=1 SV=2 - [PSB3\_HUMAN]  
P68431 Histone H3.1 OS=Homo sapiens GN=HIST1H3A PE=1 SV=2 - [H31\_HUMAN]  
Q9NSD9 Phenylalanine--tRNA ligase beta subunit OS=Homo sapiens GN=FARSB PE=1 SV=3 - [SYFB\_HUMAN]  
Q9UBF2 Coatomer subunit gamma-2 OS=Homo sapiens GN=COG2 PE=1 SV=1 - [COG2\_HUMAN]  
P11717 Cation-independent mannose-6-phosphate receptor OS=Homo sapiens GN=IGF2R PE=1 SV=3 - [MPRI\_HUMAN]  
P26196 Probable ATP-dependent RNA helicase DDX6 OS=Homo sapiens GN=DDX6 PE=1 SV=2 - [DDX6\_HUMAN]  
P56192 Methionine--tRNA ligase, cytoplasmic OS=Homo sapiens GN=MARS PE=1 SV=2 - [SYMC\_HUMAN]  
P12956 X-ray repair cross-complementing protein 6 OS=Homo sapiens GN=XRCC6 PE=1 SV=2 - [XRCC6\_HUMAN]  
Q04343 Pre-mRNA-splicing factor ATP-dependent RNA helicase DHX15 OS=Homo sapiens GN=DXH15 PE=1 SV=2 - [DXH15\_HUMAN]  
Q15230 Laminin subunit alpha-5 OS=Homo sapiens GN=LAMA5 PE=1 SV=8 - [LAMA5\_HUMAN]  
Q13838 Spliceosome RNA helicase DDX39B OS=Homo sapiens GN=DDX39B PE=1 SV=1 - [DX39B\_HUMAN]  
P61586 Transforming protein RhoA OS=Homo sapiens GN=RHOA PE=1 SV=1 - [RHOA\_HUMAN]  
Q9Y5X1 Sorting nexin-9 OS=Homo sapiens GN=SNX9 PE=1 SV=1 - [SNX9\_HUMAN]  
075643 U5 small nuclear ribonucleoprotein 200 kDa helicase OS=Homo sapiens GN=SNRNP200 PE=1 SV=2 - [U520\_HUMAN]  
P08174 Complement decay-accelerating factor OS=Homo sapiens GN=CD55 PE=1 SV=4 - [DAF\_HUMAN]  
000468 Agrin OS=Homo sapiens GN=AGRN PE=1 SV=5 - [AGRN\_HUMAN]  
P33993 DNA replication licensing factor MCM7 OS=Homo sapiens GN=MCM7 PE=1 SV=4 - [MCM7\_HUMAN]  
Q14240 Eukaryotic initiation factor 4A-II OS=Homo sapiens GN=EIF4A2 PE=1 SV=2 - [IF4A2\_HUMAN]  
Q14697 Neutral alpha-glucosidase AB OS=Homo sapiens GN=GANAB PE=1 SV=3 - [GANAB\_HUMAN]  
Q6P2Q9 Pre-mRNA-processing-splicing factor 8 OS=Homo sapiens GN=PRPF8 PE=1 SV=2 - [PRP8\_HUMAN]  
Q13155 Aminoacyl tRNA synthase complex-interacting multifunctional protein 2 OS=Homo sapiens GN=AIMP2 PE=1 SV=2 - [AIMP2\_HUMAN]  
Q9NR50 Translation initiation factor eIF-2B subunit gamma OS=Homo sapiens GN=EIF2B3 PE=1 SV=1 - [E12B6\_HUMAN]  
Q99961 Endophilin-A2 OS=Homo sapiens GN=SH3GL1 PE=1 SV=1 - [SH3G1\_HUMAN]  
P50150 Guanine nucleotide-binding protein (G(I)/G(S))/G(O) subunit gamma-4 OS=Homo sapiens GN=GNG4 PE=1 SV=1 - [GBG4\_HUMAN]  
Q8WUW1 Protein BRICK1 OS=Homo sapiens GN=BRK1 PE=1 SV=1 - [BRK1\_HUMAN]  
P14258 E3 ubiquitin/ISG15 ligase TRIM25 OS=Homo sapiens GN=TRIM25 PE=1 SV=2 - [TR125\_HUMAN]  
P18124 60S ribosomal protein L7 OS=Homo sapiens GN=RPL7 PE=1 SV=1 - [RL7\_HUMAN]  
P04899 Guanine nucleotide-binding protein (G(i)) subunit alpha-2 OS=Homo sapiens GN=GNAI2 PE=1 SV=3 - [GNAI2\_HUMAN]  
P27635 60S ribosomal protein L10 OS=Homo sapiens GN=RPL10 PE=1 SV=4 - [RL10\_HUMAN]  
Q12996 Cleavage stimulation factor subunit 3 OS=Homo sapiens GN=CSTF3 PE=1 SV=1 - [CSTF3\_HUMAN]  
Q12904 Aminoacyl tRNA synthase complex-interacting multifunctional protein 1 OS=Homo sapiens GN=AIMP1 PE=1 SV=2 - [AIMP1\_HUMAN]  
Q96CW1 AP-2 complex subunit mu OS=Homo sapiens GN=AP2M1 PE=1 SV=2 - [AP2M1\_HUMAN]  
Q9BZH6 WD repeat-containing protein 11 OS=Homo sapiens GN=WDR11 PE=1 SV=1 - [WDR11\_HUMAN]  
P61326 Protein mago nashi homolog OS=Homo sapiens GN=MAGOH PE=1 SV=1 - [MGN\_HUMAN]  
Q6P2E9 Enhancer of mRNA-decapping protein 4 OS=Homo sapiens GN=EDC4 PE=1 SV=1 - [EDC4\_HUMAN]  
Q14315 Filamin-C OS=Homo sapiens GN=FLNC PE=1 SV=3 - [FLNC\_HUMAN]  
P46940 Ras GTPase-activating-like protein IQGAP1 OS=Homo sapiens GN=IQGAP1 PE=1 SV=1 - [IQGA1\_HUMAN]  
Q81VM0 Colled-coil domain-containing protein 50 OS=Homo sapiens GN=CDC50 PE=1 SV=1 - [CCD50\_HUMAN]  
Q9Y262 Eukaryotic translation initiation factor 3 subunit L OS=Homo sapiens GN=EIF3L PE=1 SV=1 - [EIF3L\_HUMAN]  
Q01813 ATP-dependent 6-phosphofructokinase, platelet type OS=Homo sapiens GN=PFKP PE=1 SV=2 - [PFKAP\_HUMAN]  
P54920 Alpha-soluble NSF attachment protein OS=Homo sapiens GN=NAPA PE=1 SV=3 - [SNAAP\_HUMAN]  
P26641 Elongation factor 1-gamma OS=Homo sapiens GN=EEF1G PE=1 SV=3 - [EF1G\_HUMAN]  
P83110 Serine protease HTRA3 OS=Homo sapiens GN=HTRA3 PE=1 SV=2 - [HTRA3\_HUMAN]  
Q60678 Protein arginine N-methyltransferase 3 OS=Homo sapiens GN=PRMT3 PE=1 SV=3 - [ANM3\_HUMAN]  
P15880 40S ribosomal protein S2 OS=Homo sapiens GN=RPS2 PE=1 SV=2 - [RS2\_HUMAN]  
Q60814 Histone H2B type 1-K OS=Homo sapiens GN=HIST1H2BK PE=1 SV=3 - [H2B1K\_HUMAN]  
P06899 Histone H2B type 1-J OS=Homo sapiens GN=HIST1H2BJ PE=1 SV=3 - [H2B1J\_HUMAN]  
P17844 Probable ATP-dependent RNA helicase DDX5 OS=Homo sapiens GN=DDX5 PE=1 SV=1 - [DDX5\_HUMAN]  
Q9Y287 Integral membrane protein 2B OS=Homo sapiens GN=ITM2B PE=1 SV=1 - [ITM2B\_HUMAN]  
Q9Y250 DNA-directed RNA polymerases I and III subunit RPAC2 OS=Homo sapiens GN=POLR1D PE=1 SV=1 - [RPAC2\_HUMAN]  
Q96019 Actin-like protein 6A OS=Homo sapiens GN=ACTL6A PE=1 SV=1 - [ACL6A\_HUMAN]  
P26368 Splicing factor U2AF 65 kDa subunit OS=Homo sapiens GN=U2AF2 PE=1 SV=4 - [U2AF2\_HUMAN]  
Q02790 Peptidyl-prolyl cis-trans isomerase FKBP4 OS=Homo sapiens GN=FKBP4 PE=1 SV=3 - [FKBP4\_HUMAN]  
P78527 DNA-dependent protein kinase catalytic subunit OS=Homo sapiens GN=PRKDC PE=1 SV=3 - [PRKDC\_HUMAN]  
Q92600 Cell differentiation protein RCD1 homolog OS=Homo sapiens GN=RQCD1 PE=1 SV=1 - [RCD1\_HUMAN]  
Q87AF3 WD repeat-containing protein 48 OS=Homo sapiens GN=WDR48 PE=1 SV=1 - [WDR48\_HUMAN]  
P15531 Nucleoside diphosphate kinase A OS=Homo sapiens GN=NME1 PE=1 SV=1 - [NDKA\_HUMAN]  
015212 Prefoldin subunit 6 OS=Homo sapiens GN=PF6 PE=1 SV=1 - [PF6\_HUMAN]

P12532 Creatine kinase U-type, mitochondrial OS=Homo sapiens GN=CKMT1A PE=1 SV=1 - [KCRU\_HUMAN]  
P61978 Heterogeneous nuclear ribonucleoprotein K OS=Homo sapiens GN=HNRNPK PE=1 SV=1 - [HNRNPK\_HUMAN]  
P61019 Ras-related protein Rab-2A OS=Homo sapiens GN=RAB2A PE=1 SV=1 - [RAB2A\_HUMAN]  
P35232 Prohibitin OS=Homo sapiens GN=PHB PE=1 SV=1 - [PHB\_HUMAN]  
Q6PCB0 von Willebrand factor A domain-containing protein 1 OS=Homo sapiens GN=VWA1 PE=2 SV=1 - [VWA1\_HUMAN]  
P09651 Heterogeneous nuclear ribonucleoprotein A1 OS=Homo sapiens GN=HNRNPA1 PE=1 SV=5 - [ROA1\_HUMAN]  
Q9NQ75 Exosome complex component RRP40 OS=Homo sapiens GN=EXOSC3 PE=1 SV=3 - [EXOSC3\_HUMAN]  
P61020 Ras-related protein Rab-5B OS=Homo sapiens GN=RAB5B PE=1 SV=1 - [RAB5B\_HUMAN]  
Q05707 Collagen alpha-1(XIV) chain OS=Homo sapiens GN=COL14A1 PE=1 SV=3 - [COE1\_HUMAN]  
O15371 Eukaryotic translation initiation factor 3 subunit D OS=Homo sapiens GN=EIF3D PE=1 SV=1 - [EIF3D\_HUMAN]  
O14737 Programmed cell death protein 5 OS=Homo sapiens GN=PDCD5 PE=1 SV=3 - [PDCD5\_HUMAN]  
P49591 Serine-tRNA ligase, cytoplasmic OS=Homo sapiens GN=SARS PE=1 SV=3 - [SYSC\_HUMAN]  
Q9UHC7 E3 ubiquitin-protein ligase makorin-1 OS=Homo sapiens GN=MKR1 PE=1 SV=3 - [MKR1\_HUMAN]  
O43324 Eukaryotic translation elongation factor 1 epsilon-1 OS=Homo sapiens GN=EEF1E1 PE=1 SV=1 - [MCA3\_HUMAN]  
Q15021 Condensin complex subunit 1 OS=Homo sapiens GN=NCAPD2 PE=1 SV=3 - [CND1\_HUMAN]  
O60547 GDP-mannose 4,6 dehydratase OS=Homo sapiens GN=GMD5 PE=1 SV=1 - [GMD5\_HUMAN]  
Q61A86 Elongator complex protein 2 OS=Homo sapiens GN=ELP2 PE=1 SV=2 - [ELP2\_HUMAN]  
P31948 Stress-induced-phosphoprotein 1 OS=Homo sapiens GN=STIP1 PE=1 SV=1 - [STIP1\_HUMAN]  
P02792 Ferritin light chain OS=Homo sapiens GN=FTL PE=1 SV=2 - [FRTL\_HUMAN]  
P21964 Catechol O-methyltransferase OS=Homo sapiens GN=COMT PE=1 SV=2 - [COMT\_HUMAN]  
O15160 DNA-directed RNA polymerase I and III subunit RPAC1 OS=Homo sapiens GN=POLR1C PE=1 SV=1 - [RPAC1\_HUMAN]  
Q6P2C8 Mediator of RNA polymerase II transcription subunit 27 OS=Homo sapiens GN=MED27 PE=1 SV=1 - [MED27\_HUMAN]  
P62258 14-3-3 protein epsilon OS=Homo sapiens GN=YWHAE PE=1 SV=1 - [1433E\_HUMAN]  
P49915 GMP synthase [glutamine-hydrolyzing] OS=Homo sapiens GN=GMP5 PE=1 SV=1 - [GUAA\_HUMAN]  
O60506 Heterogeneous nuclear ribonucleoprotein Q OS=Homo sapiens GN=SYNCRIP PE=1 SV=2 - [HNRPQ\_HUMAN]  
Q5VYK3 Proteasome-associated protein ECM29 homolog OS=Homo sapiens GN=ECM29 PE=1 SV=2 - [ECM29\_HUMAN]  
P02786 Transferrin receptor protein 1 OS=Homo sapiens GN=TFRC PE=1 SV=2 - [TFR1\_HUMAN]  
O43175 D-3-phosphoglycerate dehydrogenase OS=Homo sapiens GN=PHGDH PE=1 SV=4 - [SERA\_HUMAN]  
P01137 Transforming growth factor beta-1 OS=Homo sapiens GN=TGFB1 PE=1 SV=2 - [TGFB1\_HUMAN]  
O43854 EGF-like repeat and discoidin I-like domain-containing protein 3 OS=Homo sapiens GN=EDIL3 PE=1 SV=1 - [EDIL3\_HUMAN]  
Q12899 Tripartite motif-containing protein 26 OS=Homo sapiens GN=TRIM26 PE=1 SV=1 - [TRI26\_HUMAN]  
P62424 60S ribosomal protein L7a OS=Homo sapiens GN=RPL7A PE=1 SV=2 - [RL7A\_HUMAN]  
Q9H6D7 HAUS augmin-like complex subunit 4 OS=Homo sapiens GN=HAUS4 PE=1 SV=1 - [HAUS4\_HUMAN]  
O00267 Transcription elongation factor SPT5 OS=Homo sapiens GN=SPT5H PE=1 SV=1 - [SPT5H\_HUMAN]  
O43707 Alpha-actinin-4 OS=Homo sapiens GN=ACTN4 PE=1 SV=2 - [ACTN4\_HUMAN]  
P33176 Kinesin-1 heavy chain OS=Homo sapiens GN=KIF5B PE=1 SV=1 - [KINH\_HUMAN]  
P55735 Protein SEC13 homolog OS=Homo sapiens GN=SEC13 PE=1 SV=3 - [SEC13\_HUMAN]  
Q12768 WASH complex subunit strumpellin OS=Homo sapiens GN=KIAA0196 PE=1 SV=1 - [STRUM\_HUMAN]  
O00429 Dynamin-1-like protein OS=Homo sapiens GN=DNML1 PE=1 SV=2 - [DNML1\_HUMAN]  
P52272 Heterogeneous nuclear ribonucleoprotein M OS=Homo sapiens GN=HNRNPM PE=1 SV=3 - [HNRPM\_HUMAN]  
O95163 Elongator complex protein 1 OS=Homo sapiens GN=IKBKAP PE=1 SV=3 - [ELP1\_HUMAN]  
Q13868 Exosome complex component RRP4 OS=Homo sapiens GN=EXOSC2 PE=1 SV=2 - [EXOSC2\_HUMAN]  
Q13547 Histone deacetylase 1 OS=Homo sapiens GN=HDAC1 PE=1 SV=1 - [HDAC1\_HUMAN]  
Q9UJX3 Anaphase-promoting complex subunit 7 OS=Homo sapiens GN=ANAPC7 PE=1 SV=4 - [APC7\_HUMAN]  
Q8TF74 WAS/WASL-interacting protein family member 2 OS=Homo sapiens GN=WIPF2 PE=1 SV=1 - [WIPF2\_HUMAN]  
P15121 Aldose reductase OS=Homo sapiens GN=AKR1B1 PE=1 SV=3 - [ALDR\_HUMAN]  
Q9H7D7 WD repeat-containing protein 26 OS=Homo sapiens GN=WDR26 PE=1 SV=3 - [WDR26\_HUMAN]  
Q9BVC4 Target of rapamycin complex subunit LST8 OS=Homo sapiens GN=MLST8 PE=1 SV=1 - [LST8\_HUMAN]  
P62330 ADP-ribosylation factor 6 OS=Homo sapiens GN=ARF6 PE=1 SV=2 - [ARF6\_HUMAN]  
Q86V56 Dynein assembly factor 5, axonemal OS=Homo sapiens GN=DNAF5 PE=1 SV=4 - [DAAF5\_HUMAN]  
P62917 60S ribosomal protein L8 OS=Homo sapiens GN=RPL8 PE=1 SV=2 - [RL8\_HUMAN]  
P61160 Actin-related protein 2 OS=Homo sapiens GN=ACTR2 PE=1 SV=1 - [ARP2\_HUMAN]  
O14744 Protein arginine N-methyltransferase 5 OS=Homo sapiens GN=PRMT5 PE=1 SV=4 - [ANM5\_HUMAN]  
Q8N668 COMM domain-containing protein 1 OS=Homo sapiens GN=COMM1 PE=1 SV=1 - [COMM1\_HUMAN]  
P60884 DnaJ homolog subfamily A member 2 OS=Homo sapiens GN=DNAJ2 PE=1 SV=1 - [DNJ2\_HUMAN]  
P48444 Coatomer subunit delta OS=Homo sapiens GN=ARCN1 PE=1 SV=1 - [COPD\_HUMAN]  
P24821 Tenascin OS=Homo sapiens GN=TNCE1 PE=1 SV=3 - [TENA\_HUMAN]  
O00567 Nucleolar protein 56 OS=Homo sapiens GN=NOP56 PE=1 SV=4 - [NOP56\_HUMAN]  
O15143 Actin-related protein 2/3 complex subunit 1B OS=Homo sapiens GN=ARPC1B PE=1 SV=3 - [ARPC1B\_HUMAN]  
Q460F5 Vacuolar protein sorting-associated protein 26B OS=Homo sapiens GN=VPS26B PE=1 SV=2 - [VP26B\_HUMAN]  
P62699 Protein yippee-like 5 OS=Homo sapiens GN=YPEL5 PE=1 SV=1 - [YPEL5\_HUMAN]  
Q14974 Importin subunit beta-1 OS=Homo sapiens GN=KPNB1 PE=1 SV=2 - [IMB1\_HUMAN]  
P46781 40S ribosomal protein S9 OS=Homo sapiens GN=RPS9 PE=1 SV=3 - [RS9\_HUMAN]  
O14828 Secretory carrier-associated membrane protein 3 OS=Homo sapiens GN=SCAMP3 PE=1 SV=3 - [SCAMP3\_HUMAN]  
P48556 26S proteasome non-ATPase regulatory subunit 8 OS=Homo sapiens GN=PSMD8 PE=1 SV=2 - [PSMD8\_HUMAN]  
P53350 Serine/threonine-protein kinase PLK1 OS=Homo sapiens GN=PLK1 PE=1 SV=1 - [PLK1\_HUMAN]  
Q9H1Y0 Autophagy protein 5 OS=Homo sapiens GN=ATG5 PE=1 SV=2 - [ATG5\_HUMAN]  
O75794 Cell division cycle protein 123 homolog OS=Homo sapiens GN=CDC123 PE=1 SV=1 - [CD123\_HUMAN]  
Q92930 Ras-related protein Rab-8B OS=Homo sapiens GN=RAB8B PE=1 SV=2 - [RAB8B\_HUMAN]  
P51991 Heterogeneous nuclear ribonucleoprotein A3 OS=Homo sapiens GN=HNRNPA3 PE=1 SV=2 - [ROA3\_HUMAN]  
P18669 Phosphoglycerate mutase 1 OS=Homo sapiens GN=PGAM1 PE=1 SV=2 - [PGAM1\_HUMAN]  
O60256 Phosphoribosyl pyrophosphate synthase-associated protein 2 OS=Homo sapiens GN=PRPSAP2 PE=1 SV=1 - [KPRB\_HUMAN]  
P46060 Ran GTPase-activating protein 1 OS=Homo sapiens GN=RANGAP1 PE=1 SV=1 - [RAGP1\_HUMAN]  
Q5W32 BR01 domain-containing protein BROX OS=Homo sapiens GN=BROX PE=1 SV=1 - [BROX\_HUMAN]  
Q9BRJ7 Protein syndesmos OS=Homo sapiens GN=NUTD16L1 PE=1 SV=1 - [SDOS\_HUMAN]  
Q13200 26S proteasome non-ATPase regulatory subunit 2 OS=Homo sapiens GN=PSMD2 PE=1 SV=3 - [PSMD2\_HUMAN]  
Q6S2W1 Sterile alpha and TIR motif-containing protein 1 OS=Homo sapiens GN=SARM1 PE=1 SV=1 - [SARM1\_HUMAN]  
Q96P16 Regulation of nuclear pre-mRNA domain-containing protein 1A OS=Homo sapiens GN=RPRD1A PE=1 SV=1 - [RPRD1A\_HUMAN]  
O43264 Centromere/kinetochore protein zw10 homolog OS=Homo sapiens GN=ZW10 PE=1 SV=3 - [ZW10\_HUMAN]  
Q9Y490 Talin-1 OS=Homo sapiens GN=TLN1 PE=1 SV=3 - [TLN1\_HUMAN]  
P38606 V-type proton ATPase catalytic subunit A OS=Homo sapiens GN=ATP6V1A PE=1 SV=2 - [VATA\_HUMAN]  
P41091 Eukaryotic translation initiation factor 2 subunit 3 OS=Homo sapiens GN=EIF2S3 PE=1 SV=3 - [IF2G\_HUMAN]  
P00338 L-lactate dehydrogenase A chain OS=Homo sapiens GN=LDHA PE=1 SV=2 - [LDHA\_HUMAN]  
Q15185 Prostaglandin H synthase 3 OS=Homo sapiens GN=PTGES3 PE=1 SV=1 - [TEBP\_HUMAN]  
Q9NQX3 Gephyrin OS=Homo sapiens GN=GPHN PE=1 SV=1 - [GEPH\_HUMAN]  
P13807 Glycogen [starch] synthase, muscle OS=Homo sapiens GN=GYS1 PE=1 SV=2 - [GYS1\_HUMAN]  
P47755 F-actin-capping protein subunit alpha-2 OS=Homo sapiens GN=CAPZA2 PE=1 SV=3 - [CAZA2\_HUMAN]  
P63208 S-phase kinase-associated protein 1 OS=Homo sapiens GN=SKP1 PE=1 SV=2 - [SKP1\_HUMAN]  
Q94832 Unconventional myosin-1d OS=Homo sapiens GN=MYO1D PE=1 SV=2 - [MYO1D\_HUMAN]  
P63167 Dynein light chain 1, cytoplasmic OS=Homo sapiens GN=DYLL1 PE=1 SV=1 - [DYLL1\_HUMAN]  
P61225 Ras-related protein Rap-2b OS=Homo sapiens GN=RAP2B PE=1 SV=1 - [RAP2B\_HUMAN]  
P27361 Mitogen-activated protein kinase 3 OS=Homo sapiens GN=MAPK3 PE=1 SV=4 - [MKO3\_HUMAN]  
Q13310 Polyadenylate-binding protein 4 OS=Homo sapiens GN=PABPC4 PE=1 SV=1 - [PABP4\_HUMAN]  
Q9UQ80 Proliferation-associated protein 2G4 OS=Homo sapiens GN=PA2G4 PE=1 SV=3 - [PA2G4\_HUMAN]  
P61769 Beta-2-microglobulin OS=Homo sapiens GN=B2M PE=1 SV=1 - [B2MG\_HUMAN]  
Q96FH0 Protein MEF2B OS=Homo sapiens GN=MEF2B PE=1 SV=1 - [MP2B\_HUMAN]  
P13797 Platin-3 OS=Homo sapiens GN=PLS3 PE=1 SV=4 - [PLST\_HUMAN]  
Q07955 Serine/arginine-rich splicing factor 1 OS=Homo sapiens GN=SRSF1 PE=1 SV=2 - [SRSF1\_HUMAN]  
Q12874 Splicing factor 3A subunit 3 OS=Homo sapiens GN=SF3A3 PE=1 SV=1 - [SF3A3\_HUMAN]  
Q9Y696 Chloride intracellular channel protein 4 OS=Homo sapiens GN=CLIC4 PE=1 SV=4 - [CLIC4\_HUMAN]  
P18065 Insulin-like growth factor-binding protein 2 OS=Homo sapiens GN=IGFBP2 PE=1 SV=2 - [IBP2\_HUMAN]  
P78346 Ribonuclease P protein subunit p30 OS=Homo sapiens GN=PPP30 PE=1 SV=1 - [RPP30\_HUMAN]  
P11233 Ras-related protein Ral-A OS=Homo sapiens GN=RALA PE=1 SV=1 - [RALA\_HUMAN]  
Q08AM6 Protein VAC14 homolog OS=Homo sapiens GN=VAC14 PE=1 SV=1 - [VAC14\_HUMAN]  
P13497 Bone morphogenetic protein 1 OS=Homo sapiens GN=BMP1 PE=1 SV=2 - [BMP1\_HUMAN]  
P49642 DNA primase small subunit OS=Homo sapiens GN=PRIM1 PE=1 SV=1 - [PR11\_HUMAN]  
Q92485 Acid sphingomyelinase-like phosphodiesterase 3b OS=Homo sapiens GN=SMPDL3B PE=2 SV=2 - [ASM3B\_HUMAN]  
Q16555 Dihydroxyindinase-related protein 2 OS=Homo sapiens GN=DPYSL2 PE=1 SV=1 - [DPYSL2\_HUMAN]  
P61604 10 kDa heat shock protein, mitochondrial OS=Homo sapiens GN=HSPE1 PE=1 SV=2 - [CH10\_HUMAN]  
Q60826 Coiled-coil domain-containing protein 22 OS=Homo sapiens GN=CDC22 PE=1 SV=1 - [CCD22\_HUMAN]  
P55058 Phospholipid transfer protein OS=Homo sapiens GN=PLTP PE=1 SV=1 - [PLTP\_HUMAN]  
P62269 40S ribosomal protein S18 OS=Homo sapiens GN=RPS18 PE=1 SV=3 - [RS18\_HUMAN]  
P10586 Receptor-type tyrosine-protein phosphatase F OS=Homo sapiens GN=PTPRF PE=1 SV=2 - [PTPRF\_HUMAN]  
P25205 DNA replication licensing factor MCM3 OS=Homo sapiens GN=MCM3 PE=1 SV=3 - [MCM3\_HUMAN]  
P54727 UV excision repair protein RAD23 homolog B OS=Homo sapiens GN=RAD23B PE=1 SV=1 - [RD23B\_HUMAN]

P50542 Peroxisomal targeting signal 1 receptor OS=Homo sapiens GN=PEX5 PE=1 SV=3 - [PEX5\_HUMAN]  
P46459 Vesicle-fusing ATPase OS=Homo sapiens GN=NSF PE=1 SV=3 - [NSF\_HUMAN]  
Q9N232 Actin-related protein 10 OS=Homo sapiens GN=ACTR10 PE=1 SV=1 - [ARP10\_HUMAN]  
Q10567 AP-1 complex subunit beta-1 OS=Homo sapiens GN=AP1B1 PE=1 SV=2 - [AP1B1\_HUMAN]  
Q9U1X2 Cell division cycle protein 23 homolog OS=Homo sapiens GN=CDC23 PE=1 SV=3 - [CDC23\_HUMAN]  
POCW22 40S ribosomal protein S17-like OS=Homo sapiens GN=RPS17L PE=1 SV=1 - [RS17L\_HUMAN]  
Q15836 Vesicle-associated membrane protein 3 OS=Homo sapiens GN=VAMP3 PE=1 SV=3 - [VAMP3\_HUMAN]  
Q9Y333 U6 snRNA-associated Sm-like protein LSm2 OS=Homo sapiens GN=LSM2 PE=1 SV=1 - [LSM2\_HUMAN]  
Q9Y2A7 Nck-associated protein 1 OS=Homo sapiens GN=NCKAP1 PE=1 SV=1 - [NCKAP1\_HUMAN]  
Q9U1A9 Exportin-7 OS=Homo sapiens GN=XP07 PE=1 SV=3 - [XP07\_HUMAN]  
P07602 Prosaposin OS=Homo sapiens GN=PSAP PE=1 SV=2 - [PSAP\_HUMAN]  
Q02543 60S ribosomal protein L18a OS=Homo sapiens GN=RPL18A PE=1 SV=2 - [RL18A\_HUMAN]  
Q13405 39S ribosomal protein L49, mitochondrial OS=Homo sapiens GN=MRPL49 PE=1 SV=1 - [RM49\_HUMAN]  
P14625 Endoplasmic OS=Homo sapiens GN=HSP90B1 PE=1 SV=1 - [ENPL\_HUMAN]  
Q15459 Splicing factor 3A subunit 1 OS=Homo sapiens GN=SF3A1 PE=1 SV=1 - [SF3A1\_HUMAN]  
Q5TDH0 Protein DD11 homolog 2 OS=Homo sapiens GN=DD12 PE=1 SV=1 - [DD12\_HUMAN]  
Q15818 Neuronal pentraxin-1 OS=Homo sapiens GN=NPTX1 PE=2 SV=2 - [NPTX1\_HUMAN]  
Q9NR45 Sialic acid synthase OS=Homo sapiens GN=NANS PE=1 SV=2 - [SIAS\_HUMAN]  
AOAVT1 Ubiquitin-like modifier-activating enzyme 6 OS=Homo sapiens GN=UBA6 PE=1 SV=1 - [UBA6\_HUMAN]  
P54709 Sodium/potassium-transporting ATPase subunit beta-3 OS=Homo sapiens GN=ATP1B3 PE=1 SV=1 - [AT1B3\_HUMAN]  
P22626 Heterogeneous nuclear ribonucleoproteins A2/B1 OS=Homo sapiens GN=HNRNPA2B1 PE=1 SV=2 - [ROA2\_HUMAN]  
Q15436 Protein transport protein Sec23A OS=Homo sapiens GN=SEC23A PE=1 SV=2 - [SC23A\_HUMAN]  
Q13151 Heterogeneous nuclear ribonucleoprotein A0 OS=Homo sapiens GN=HNRNPA0 PE=1 SV=1 - [ROA0\_HUMAN]  
Q9P265 Disco-interacting protein 2 homolog B OS=Homo sapiens GN=DIP2B PE=1 SV=3 - [DIP2B\_HUMAN]  
Q9Y3L5 Ras-related protein Rap-2c OS=Homo sapiens GN=RAP2C PE=1 SV=1 - [RAP2C\_HUMAN]  
P16870 Carboxypeptidase E OS=Homo sapiens GN=CPE PE=1 SV=1 - [CBPE\_HUMAN]  
O43865 Putative adenosylhomocysteinase 2 OS=Homo sapiens GN=AHCYL1 PE=1 SV=2 - [SAHH2\_HUMAN]  
Q9URV8 Protein argonaute-2 OS=Homo sapiens GN=AGO2 PE=1 SV=3 - [AGO2\_HUMAN]  
Q9H7P6 Multivesicular body subunit 12B OS=Homo sapiens GN=MVB12B PE=1 SV=2 - [MB12B\_HUMAN]  
O14672 Discintegrin and metalloproteinase domain-containing protein 10 OS=Homo sapiens GN=ADAM10 PE=1 SV=1 - [ADA10\_HUMAN]  
O60568 Procollagen-lysine, 2-oxoglutarate 5-dioxygenase 3 OS=Homo sapiens GN=PLOD3 PE=1 SV=1 - [PLOD3\_HUMAN]  
P06748 Nucleophosmin OS=Homo sapiens GN=NPM1 PE=1 SV=2 - [NPM\_HUMAN]  
Q07866 Kinesin light chain 1 OS=Homo sapiens GN=KLC1 PE=1 SV=2 - [KLC1\_HUMAN]  
Q92841 Probable ATP-dependent RNA helicase DDX17 OS=Homo sapiens GN=DDX17 PE=1 SV=2 - [DDX17\_HUMAN]  
Q13557 Calcium/calmodulin-dependent protein kinase type II subunit delta OS=Homo sapiens GN=CAMK2D PE=1 SV=3 - [KCC2D\_HUMAN]  
P61916 Epididymal secretory protein E1 OS=Homo sapiens GN=NPC2 PE=1 SV=1 - [NPC2\_HUMAN]  
Q15907 Ras-related protein Rab-11B OS=Homo sapiens GN=RAB11B PE=1 SV=4 - [RB11B\_HUMAN]  
O60513 Beta-1,4-galactosyltransferase 4 OS=Homo sapiens GN=B4GALT4 PE=1 SV=1 - [B4GT4\_HUMAN]  
O76071 Probable cytosolic iron-sulfur protein assembly protein CIAO1 OS=Homo sapiens GN= CIAO1 PE=1 SV=1 - [CIAO1\_HUMAN]  
Q8N1G4 Leucine-rich repeat-containing protein 47 OS=Homo sapiens GN=LRRC47 PE=1 SV=1 - [LRC47\_HUMAN]  
Q9Y4E8 Ubiquitin carboxyl-terminal hydrolase 15 OS=Homo sapiens GN=USP15 PE=1 SV=3 - [UBP15\_HUMAN]  
Q9NVA2 Septin-11 OS=Homo sapiens GN=SEPT11 PE=1 SV=3 - [SEP11\_HUMAN]  
P17812 CTP synthase 1 OS=Homo sapiens GN=CTSP1 PE=1 SV=2 - [PYRG1\_HUMAN]  
P43490 Nicotinamide phosphoribosyltransferase OS=Homo sapiens GN=NAMPT PE=1 SV=1 - [NAMPT\_HUMAN]  
P50570 Dynamin-2 OS=Homo sapiens GN=DNM2 PE=1 SV=2 - [DYN2\_HUMAN]  
P46783 40S ribosomal protein S10 OS=Homo sapiens GN=RPS10 PE=1 SV=1 - [RS10\_HUMAN]  
P55884 Eukaryotic translation initiation factor 3 subunit B OS=Homo sapiens GN=EIF3B PE=1 SV=3 - [EIF3B\_HUMAN]  
P23919 Thymidylate kinase OS=Homo sapiens GN=TYMK PE=1 SV=4 - [KTHY\_HUMAN]  
O94813 Slit homolog 2 protein OS=Homo sapiens GN=SLIT2 PE=1 SV=1 - [SLIT2\_HUMAN]  
P01892 HLA class II histocompatibility antigen, A-2 alpha chain OS=Homo sapiens GN=HLA-A PE=1 SV=1 - [IA02\_HUMAN]  
P01116 GTPase KRas OS=Homo sapiens GN=KRAS PE=1 SV=1 - [RASK\_HUMAN]  
Q9BQ16 Testican-3 OS=Homo sapiens GN=SPOCK3 PE=1 SV=2 - [TICN3\_HUMAN]  
Q9Y4K3 TNF receptor-associated factor 6 OS=Homo sapiens GN=TRAF6 PE=1 SV=1 - [TRAF6\_HUMAN]  
Q13085 Acetyl-CoA carboxylase 1 OS=Homo sapiens GN=ACACA PE=1 SV=2 - [ACACA\_HUMAN]  
P08133 Annexin A6 OS=Homo sapiens GN=ANXA6 PE=1 SV=3 - [ANXA6\_HUMAN]  
Q14558 Phosphoribosyl pyrophosphate synthase-associated protein 1 OS=Homo sapiens GN=PRPSAP1 PE=1 SV=2 - [KPRA\_HUMAN]  
Q86UD1 Out at first protein homolog OS=Homo sapiens GN=OAF PE=2 SV=1 - [OAF\_HUMAN]  
Q96L92 Sorting nexin-27 OS=Homo sapiens GN=SNX27 PE=1 SV=2 - [SNX27\_HUMAN]  
P62277 40S ribosomal protein S13 OS=Homo sapiens GN=RPS13 PE=1 SV=2 - [RS13\_HUMAN]  
Q95816 BAG family molecular chaperone regulator 2 OS=Homo sapiens GN=BAG2 PE=1 SV=1 - [BAG2\_HUMAN]  
P49736 DNA replication licensing factor MCM2 OS=Homo sapiens GN=MCM2 PE=1 SV=4 - [MCM2\_HUMAN]  
P22087 rRNA 2'-O-methyltransferase fibrillar OS=Homo sapiens GN=FBL PE=1 SV=2 - [FBLR\_HUMAN]  
P83436 Conserved oligomeric Golgi complex subunit 7 OS=Homo sapiens GN=COG7 PE=1 SV=1 - [COG7\_HUMAN]  
P29144 Tripeptidyl-peptidase 2 OS=Homo sapiens GN=TPP2 PE=1 SV=4 - [TPP2\_HUMAN]  
P08195 4F2 cell-surface antigen heavy chain OS=Homo sapiens GN=SLC3A2 PE=1 SV=3 - [4F2\_HUMAN]  
Q92598 Heat shock protein 105 kDa OS=Homo sapiens GN=HSPH1 PE=1 SV=1 - [HS105\_HUMAN]  
Q9Y223 Bifunctional UDP-N-acetylglucosamine 2-epimerase/N-acetylmannosamine kinase OS=Homo sapiens GN=GNE PE=1 SV=1 - [GLCNE\_HUMAN]  
O60232 Sjogren syndrome/scleroderma autoantigen 1 OS=Homo sapiens GN=SSSCA1 PE=1 SV=1 - [SSA27\_HUMAN]  
Q9U112 V-type proton ATPase subunit H OS=Homo sapiens GN=ATP6V1H PE=1 SV=1 - [VATH\_HUMAN]  
P08582 Melanotransferrin OS=Homo sapiens GN=MF12 PE=1 SV=2 - [TRFM\_HUMAN]  
Q9NUP9 Protein lin-7 homolog C OS=Homo sapiens GN=LIN7C PE=1 SV=1 - [LIN7C\_HUMAN]  
O43396 Thioredoxin-like protein 1 OS=Homo sapiens GN=TXNL1 PE=1 SV=3 - [TXNL1\_HUMAN]  
Q13045 Protein flightless-1 homolog OS=Homo sapiens GN=FLII1 PE=1 SV=2 - [FLII1\_HUMAN]  
Q04760 Lactoylglutathione lyase OS=Homo sapiens GN=GLO1 PE=1 SV=4 - [LGUL\_HUMAN]  
P14866 Heterogeneous nuclear ribonucleoprotein L OS=Homo sapiens GN=HNRNPL PE=1 SV=2 - [HNRPL\_HUMAN]  
P48739 Phosphatidylinositol transfer protein beta isoform OS=Homo sapiens GN=P1TPNB PE=1 SV=2 - [P1TPNB\_HUMAN]  
Q14566 DNA replication licensing factor MCM6 OS=Homo sapiens GN=MCM6 PE=1 SV=1 - [MCM6\_HUMAN]  
Q15599 Na(+)/H(+) exchange regulatory cofactor NHE-RF2 OS=Homo sapiens GN=SLC9A3R2 PE=1 SV=2 - [NHRF2\_HUMAN]  
Q92945 Far upstream element-binding protein 2 OS=Homo sapiens GN=KHSRP PE=1 SV=4 - [FUBP2\_HUMAN]  
O94985 Calysteninin-1 OS=Homo sapiens GN=CLSTN1 PE=1 SV=1 - [CSTN1\_HUMAN]  
P40938 Replication factor C subunit 3 OS=Homo sapiens GN=RFC3 PE=1 SV=2 - [RFC3\_HUMAN]  
Q9H9A6 Leucine-rich repeat-containing protein 40 OS=Homo sapiens GN=LRRC40 PE=1 SV=1 - [LRC40\_HUMAN]  
P07339 Cathepsin D OS=Homo sapiens GN=CTSD PE=1 SV=1 - [CATD\_HUMAN]  
P15452 Dual specificity protein phosphatase 3 OS=Homo sapiens GN=DUSP3 PE=1 SV=1 - [DUS3\_HUMAN]  
Q86W42 THO complex subunit 6 homolog OS=Homo sapiens GN=THOC6 PE=1 SV=1 - [THOC6\_HUMAN]  
Q9BU14 DNA-directed RNA polymerase III subunit RPC3 OS=Homo sapiens GN=POLR3C PE=1 SV=1 - [RPC3\_HUMAN]  
P62314 Small nuclear ribonucleoprotein Sm D1 OS=Homo sapiens GN=SNRPD1 PE=1 SV=1 - [SMD1\_HUMAN]  
P62750 60S ribosomal protein L23a OS=Homo sapiens GN=RPL23A PE=1 SV=1 - [RL23A\_HUMAN]  
P35579 Myosin-9 OS=Homo sapiens GN=MYH9 PE=1 SV=4 - [MYH9\_HUMAN]  
Q86VP6 Cullin-associated NEDD8-dissociated protein 1 OS=Homo sapiens GN=CAND1 PE=1 SV=2 - [CAND1\_HUMAN]  
Q92616 Translational activator GCN1 OS=Homo sapiens GN=GCN1L1 PE=1 SV=6 - [GCN1L\_HUMAN]  
P29401 Transketolase OS=Homo sapiens GN=TKT PE=1 SV=3 - [TKT\_HUMAN]  
Q06203 Amidophosphoribosyltransferase OS=Homo sapiens GN=PPAT PE=1 SV=1 - [PURI\_HUMAN]  
Q8TD19 Serine/threonine-protein kinase Nek9 OS=Homo sapiens GN=NEK9 PE=1 SV=2 - [NEK9\_HUMAN]  
Q9U110 Translation initiation factor eIF-2B subunit delta OS=Homo sapiens GN=EIF2B4 PE=1 SV=2 - [E12BD\_HUMAN]  
O60493 Sorting nexin-3 OS=Homo sapiens GN=SNX3 PE=1 SV=3 - [SNX3\_HUMAN]  
P31943 Heterogeneous nuclear ribonucleoprotein H OS=Homo sapiens GN=HNRNPH1 PE=1 SV=4 - [HNRH1\_HUMAN]  
P05023 Sodium/potassium-transporting ATPase subunit alpha-1 OS=Homo sapiens GN=ATP1A1 PE=1 SV=1 - [AT1A1\_HUMAN]  
P42285 Superkiller viralicidal activity 2-like 2 OS=Homo sapiens GN=SKIV2L2 PE=1 SV=3 - [SK2L2\_HUMAN]  
P62851 40S ribosomal protein S25 OS=Homo sapiens GN=RPS25 PE=1 SV=1 - [RS25\_HUMAN]  
Q15003 Condensin complex subunit 2 OS=Homo sapiens GN=NCAPH PE=1 SV=3 - [CND2\_HUMAN]  
P13987 CD59 glycoprotein OS=Homo sapiens GN=CD59 PE=1 SV=1 - [CD59\_HUMAN]  
P61088 Ubiquitin-conjugating enzyme E2 N OS=Homo sapiens GN=UBE2N PE=1 SV=1 - [UBE2N\_HUMAN]  
Q9UB16 Guanine nucleotide-binding protein G(I)/G(S)/G(O) subunit gamma-12 OS=Homo sapiens GN=GNG12 PE=1 SV=3 - [GBG12\_HUMAN]  
O60701 UDP-glucose 6-dehydrogenase OS=Homo sapiens GN=UGDH PE=1 SV=1 - [UGDH\_HUMAN]  
Q9Y3C7 Mediator of RNA polymerase II transcription subunit 31 OS=Homo sapiens GN=MED31 PE=1 SV=1 - [MED31\_HUMAN]  
Q15654 Thyroid receptor-interacting protein 6 OS=Homo sapiens GN=TRIP6 PE=1 SV=3 - [TRIP6\_HUMAN]  
O00743 Serine/threonine-protein phosphatase 6 catalytic subunit OS=Homo sapiens GN=PPP6C PE=1 SV=1 - [PPP6\_HUMAN]  
P12266 Glutathione S-transferase Mu 3 OS=Homo sapiens GN=GSTM3 PE=1 SV=3 - [GSTM3\_HUMAN]  
Q13610 Periodic tryptophan protein 1 homolog OS=Homo sapiens GN=PPW1 PE=1 SV=1 - [PPW1\_HUMAN]  
P19021 Peptidyl-glycine alpha-amidating monoxygenase OS=Homo sapiens GN=PAM PE=1 SV=2 - [AMD\_HUMAN]  
P61254 60S ribosomal protein L26 OS=Homo sapiens GN=RPL26 PE=1 SV=1 - [RL26\_HUMAN]  
P28482 Mitogen-activated protein kinase 1 OS=Homo sapiens GN=MAPK1 PE=1 SV=3 - [MKO1\_HUMAN]  
P02545 Prelamin-A/C OS=Homo sapiens GN=LMNA PE=1 SV=1 - [LMNA\_HUMAN]  
P36543 V-type proton ATPase subunit E 1 OS=Homo sapiens GN=ATP6V1E1 PE=1 SV=1 - [VATE1\_HUMAN]

P12004 Proliferating cell nuclear antigen OS=Homo sapiens GN=PCNA PE=1 SV=1 - [PCNA\_HUMAN]  
P20839 Inosine-5'-monophosphate dehydrogenase 1 OS=Homo sapiens GN=IMPDH1 PE=1 SV=2 - [IMDH1\_HUMAN]  
Q9NSK0 Kinesin light chain 4 OS=Homo sapiens GN=KLC4 PE=1 SV=3 - [KLC4\_HUMAN]  
P56537 Eukaryotic translation initiation factor 6 OS=Homo sapiens GN=EIF6 PE=1 SV=1 - [IF6\_HUMAN]  
P11908 Ribose-phosphate pyrophosphokinase 2 OS=Homo sapiens GN=PRPS2 PE=1 SV=2 - [PRPS2\_HUMAN]  
Q15024 Exosome complex component RRP42 OS=Homo sapiens GN=EXOSC7 PE=1 SV=3 - [EXOS7\_HUMAN]  
Q13564 NEDD8-activating enzyme E1 regulatory subunit OS=Homo sapiens GN=NAE1 PE=1 SV=1 - [ULA1\_HUMAN]  
Q16363 Laminin subunit alpha-4 OS=Homo sapiens GN=LAMA4 PE=1 SV=4 - [LAMA4\_HUMAN]  
Q95757 Heat shock 70 kDa protein 4L OS=Homo sapiens GN=HSPA4L PE=1 SV=3 - [HS74L\_HUMAN]  
P62826 GTP-binding nuclear protein Ran OS=Homo sapiens GN=GAN PE=1 SV=3 - [RAN\_HUMAN]  
Q08J23 tRNA (cytosine(34)-C(5))-methyltransferase OS=Homo sapiens GN=NSUN2 PE=1 SV=2 - [NSUN2\_HUMAN]  
Q92621 Nuclear pore complex protein Nup205 OS=Homo sapiens GN=NUP205 PE=1 SV=3 - [NUP205\_HUMAN]  
P61086 Ubiquitin-conjugating enzyme E2 K OS=Homo sapiens GN=UBE2K PE=1 SV=3 - [UBE2K\_HUMAN]  
P18621 60S ribosomal protein L17 OS=Homo sapiens GN=RPL17 PE=1 SV=3 - [RL17\_HUMAN]  
Q9Y3B2 Exosome complex component CSL4 OS=Homo sapiens GN=EXOSC1 PE=1 SV=1 - [EXOS1\_HUMAN]  
Q8TCG1 Protein CIP2A OS=Homo sapiens GN=KIAA1524 PE=1 SV=2 - [CIP2A\_HUMAN]  
Q961J6 Mannose-1-phosphate guanyltransferase alpha OS=Homo sapiens GN=GMPPA PE=1 SV=1 - [GMPPA\_HUMAN]  
Q9Y3Z3 Deoxynucleoside triphosphate triphosphohydrolase SAMHD1 OS=Homo sapiens GN=SAMHD1 PE=1 SV=2 - [SAMH1\_HUMAN]  
Q8TAT6 Nuclear protein localization protein 4 homolog OS=Homo sapiens GN=NPLC4 PE=1 SV=3 - [NPL4\_HUMAN]  
Q99615 DnaJ homolog subfamily C member 7 OS=Homo sapiens GN=DNAJC7 PE=1 SV=2 - [DNJC7\_HUMAN]  
P26992 Ciliary neurotrophic factor receptor subunit alpha OS=Homo sapiens GN=CNTRF PE=1 SV=2 - [CNTRF\_HUMAN]  
P27105 Erythrocyte band 7 integral membrane protein OS=Homo sapiens GN=STOM PE=1 SV=3 - [STOM\_HUMAN]  
Q95630 STAM-binding protein OS=Homo sapiens GN=STAMPB PE=1 SV=1 - [STABP\_HUMAN]  
P28799 Granulins OS=Homo sapiens GN=GRN PE=1 SV=2 - [GRN\_HUMAN]  
P49207 60S ribosomal protein L34 OS=Homo sapiens GN=RPL34 PE=1 SV=3 - [RL34\_HUMAN]  
Q9UHD1 Cysteine and histidine-rich domain-containing protein 1 OS=Homo sapiens GN=CHORDC1 PE=1 SV=2 - [CHRD1\_HUMAN]  
Q9Y277 Voltage-dependent anion-selective channel protein 3 OS=Homo sapiens GN=VDAC3 PE=1 SV=1 - [VDAC3\_HUMAN]  
P20339 Ras-related protein Rab-5A OS=Homo sapiens GN=RAB5A PE=1 SV=2 - [RAB5A\_HUMAN]  
P63151 Serine/threonine-protein phosphatase 2A 55 kDa regulatory subunit B alpha isoform OS=Homo sapiens GN=PPP2R2A PE=1 SV=1 - [2ABA\_HUMAN]  
Q96D17 U5 small nuclear ribonucleoprotein 40 kDa protein OS=Homo sapiens GN=SNRNP40 PE=1 SV=1 - [SNR40\_HUMAN]  
Q9UQE7 Structural maintenance of chromosomes protein 3 OS=Homo sapiens GN=SMC3 PE=1 SV=2 - [SMC3\_HUMAN]  
Q96559 Ran-binding protein 9 OS=Homo sapiens GN=РАНBP9 PE=1 SV=1 - [RANBP9\_HUMAN]  
Q9Y285 Phenylalanine-tRNA ligase alpha subunit OS=Homo sapiens GN=FARSA PE=1 SV=3 - [SYFA\_HUMAN]  
Q12792 Twinfilin-1 OS=Homo sapiens GN=TWF1 PE=1 SV=3 - [TWF1\_HUMAN]  
Q96J02 E3 ubiquitin-protein ligase Itchy homolog OS=Homo sapiens GN=ITCH PE=1 SV=2 - [ITCH\_HUMAN]  
Q75607 Nucleoplasmin-3 OS=Homo sapiens GN=NPM3 PE=1 SV=3 - [NPM3\_HUMAN]  
Q12907 Vesicular integral-membrane protein VIP36 OS=Homo sapiens GN=LMAN2 PE=1 SV=1 - [LMAN2\_HUMAN]  
Q14980 Exportin-1 OS=Homo sapiens GN=XP01 PE=1 SV=1 - [XP01\_HUMAN]  
Q15437 Protein transport protein Sec23B OS=Homo sapiens GN=SEC23B PE=1 SV=2 - [SC23B\_HUMAN]  
Q9UL78 E3 ubiquitin-protein ligase HECTD1 OS=Homo sapiens GN=HECTD1 PE=1 SV=3 - [HECTD1\_HUMAN]  
P28340 DNA polymerase delta catalytic subunit OS=Homo sapiens GN=POLD1 PE=1 SV=2 - [DPD1\_HUMAN]  
P30153 Serine/threonine-protein phosphatase 2A 65 kDa regulatory subunit A alpha isoform OS=Homo sapiens GN=PPP2R1A PE=1 SV=4 - [2AAA\_HUMAN]  
Q6P1N0 Coiled-coil and C2 domain-containing protein 1A OS=Homo sapiens GN=CC2D1A PE=1 SV=1 - [C2D1A\_HUMAN]  
P30044 Peroxisredoxin-5, mitochondrial OS=Homo sapiens GN=PRDX5 PE=1 SV=4 - [PRDX5\_HUMAN]  
Q14203 Dynactin subunit 1 OS=Homo sapiens GN=DCTN1 PE=1 SV=3 - [DCTN1\_HUMAN]  
P60981 Destrin OS=Homo sapiens GN=DSTN PE=1 SV=3 - [DEST\_HUMAN]  
Q13740 CD166 antigen OS=Homo sapiens GN=ALCAM PE=1 SV=2 - [CD166\_HUMAN]  
Q13616 Cullin-1 OS=Homo sapiens GN=CUL1 PE=1 SV=2 - [CUL1\_HUMAN]  
Q14746 Conserved oligomeric Golgi complex subunit 2 OS=Homo sapiens GN=COG2 PE=1 SV=1 - [COG2\_HUMAN]  
Q9UN67 E3 ubiquitin-protein ligase CHIP OS=Homo sapiens GN=STUB1 PE=1 SV=2 - [CHIP\_HUMAN]  
Q9H9T3 Elongator complex protein 3 OS=Homo sapiens GN=ELP3 PE=1 SV=2 - [ELP3\_HUMAN]  
Q96R56 NudC domain-containing protein 1 OS=Homo sapiens GN=NUDCD1 PE=1 SV=2 - [NUDC1\_HUMAN]  
P61923 Coatamer subunit zeta-1 OS=Homo sapiens GN=COZP1 PE=1 SV=1 - [COZP1\_HUMAN]  
Q9UMR2 ATP-dependent RNA helicase DDX19B OS=Homo sapiens GN=DDX19B PE=1 SV=1 - [DD19B\_HUMAN]  
P23284 Peptidyl-prolyl cis-trans isomerase B OS=Homo sapiens GN=PP1B PE=1 SV=2 - [PP1B\_HUMAN]  
P47756 F-actin-capping protein subunit beta OS=Homo sapiens GN=CAPZB PE=1 SV=4 - [CAPZB\_HUMAN]  
Q95983 Methyl-CpG-binding domain protein 3 OS=Homo sapiens GN=MBD3 PE=1 SV=1 - [MBD3\_HUMAN]  
P26640 Valine-tRNA ligase OS=Homo sapiens GN=VARS PE=1 SV=4 - [SVVC\_HUMAN]  
P35555 Fibrillin-1 OS=Homo sapiens GN=FBN1 PE=1 SV=3 - [FBN1\_HUMAN]  
Q92466 DNA damage-binding protein 2 OS=Homo sapiens GN=DDB2 PE=1 SV=1 - [DDB2\_HUMAN]  
Q13098 COP9 signalosome complex subunit 1 OS=Homo sapiens GN=GPS1 PE=1 SV=4 - [CSN1\_HUMAN]  
Q9H3K6 BOLA-like protein 2 OS=Homo sapiens GN=BOLA2 PE=1 SV=1 - [BOLA2\_HUMAN]  
Q96KK5 Histone H2A type 1-H OS=Homo sapiens GN=HIST1H2AH PE=1 SV=3 - [H2A1H\_HUMAN]  
Q92905 COP9 signalosome complex subunit 5 OS=Homo sapiens GN=COPS5 PE=1 SV=4 - [CSN5\_HUMAN]  
Q15084 Protein disulfide-isomerase A6 OS=Homo sapiens GN=PDIA6 PE=1 SV=1 - [PDIA6\_HUMAN]  
Q7Z3B4 Nucleoporin p54 OS=Homo sapiens GN=NUP54 PE=1 SV=2 - [NUP54\_HUMAN]  
Q13330 Metastasis-associated protein MTA1 OS=Homo sapiens GN=MTA1 PE=1 SV=2 - [MTA1\_HUMAN]  
P27694 Replication protein A 70 kDa DNA-binding subunit OS=Homo sapiens GN=RPA1 PE=1 SV=2 - [RFA1\_HUMAN]  
P63173 60S ribosomal protein L38 OS=Homo sapiens GN=RPL38 PE=1 SV=2 - [RL38\_HUMAN]  
Q8WV22 Non-structural maintenance of chromosomes element 1 homolog OS=Homo sapiens GN=NSMCE1 PE=1 SV=5 - [NSE1\_HUMAN]  
P48059 LIM and senescent cell antigen-like-containing domain protein 1 OS=Homo sapiens GN=LIMS1 PE=1 SV=4 - [LIMS1\_HUMAN]  
Q9Y312 Protein AAR2 homolog OS=Homo sapiens GN=AAR2 PE=1 SV=2 - [AAR2\_HUMAN]  
P61962 DDB1 and CUL4-associated factor 7 OS=Homo sapiens GN=DCAF7 PE=1 SV=1 - [DCAF7\_HUMAN]  
Q96J84 Kin of IRRE-like protein 1 OS=Homo sapiens GN=KIRREL PE=1 SV=2 - [KIRREL\_HUMAN]  
Q92769 Histone deacetylase 2 OS=Homo sapiens GN=HDAC2 PE=1 SV=2 - [HDAC2\_HUMAN]  
Q07020 60S ribosomal protein L18 OS=Homo sapiens GN=RPL18 PE=1 SV=2 - [RL18\_HUMAN]  
P10909 Clusterin OS=Homo sapiens GN=CLU PE=1 SV=1 - [CLUS\_HUMAN]  
Q9BZL1 Ubiquitin-like protein 5 OS=Homo sapiens GN=UBL5 PE=1 SV=1 - [UBL5\_HUMAN]  
Q15370 Transcription elongation factor B polypeptide 2 OS=Homo sapiens GN=TCEB2 PE=1 SV=1 - [ELOB\_HUMAN]  
P12814 Alpha-actinin-1 OS=Homo sapiens GN=ACTN1 PE=1 SV=2 - [ACTN1\_HUMAN]  
Q14344 Guanine nucleotide-binding protein subunit alpha-13 OS=Homo sapiens GN=GNA13 PE=1 SV=2 - [GNA13\_HUMAN]  
Q15020 Squamous cell carcinoma antigen recognized by T-cells 3 OS=Homo sapiens GN=SART3 PE=1 SV=1 - [SART3\_HUMAN]  
Q7Z2W4 Zinc finger CCH-type antiviral protein 1 OS=Homo sapiens GN=ZC3HAV1 PE=1 SV=3 - [ZC3HV\_HUMAN]  
Q9BSJ2 Gamma-tubulin complex component 2 OS=Homo sapiens GN=TUBGCP2 PE=1 SV=2 - [GCP2\_HUMAN]  
Q9Y5Q8 General transcription factor 3C polypeptide 5 OS=Homo sapiens GN=TF3C5 PE=1 SV=2 - [TF3C5\_HUMAN]  
P09525 Annexin A4 OS=Homo sapiens GN=ANXA4 PE=1 SV=4 - [ANXA4\_HUMAN]  
Q00425 Insulin-like growth factor 2 mRNA-binding protein 3 OS=Homo sapiens GN=IGF2BP3 PE=1 SV=2 - [IF2B3\_HUMAN]  
Q9BZK7 F-box-like/WD repeat-containing protein TBL1XR1 OS=Homo sapiens GN=TBL1XR1 PE=1 SV=1 - [TBL1R\_HUMAN]  
Q5ZPR3 CD276 antigen OS=Homo sapiens GN=CD276 PE=1 SV=1 - [CD276\_HUMAN]  
P04908 Histone H2A type 1-B/E OS=Homo sapiens GN=HIST1H2AB PE=1 SV=2 - [H2A1B\_HUMAN]  
Q96C90 Protein phosphatase 1 regulatory subunit 14B OS=Homo sapiens GN=PPP1R14B PE=1 SV=3 - [PP14B\_HUMAN]  
Q75351 Vacuolar protein sorting-associated protein 4B OS=Homo sapiens GN=VPS4B PE=1 SV=2 - [VPS4B\_HUMAN]  
P61224 Ras-related protein Rap-1b OS=Homo sapiens GN=RAP1B PE=1 SV=1 - [RAP1B\_HUMAN]  
P62834 Ras-related protein Rap-1A OS=Homo sapiens GN=RAP1A PE=1 SV=1 - [RAP1A\_HUMAN]  
P41250 Glycine-tRNA ligase OS=Homo sapiens GN=GARS PE=1 SV=3 - [SYG\_HUMAN]  
P48729 Casein kinase I isoform alpha OS=Homo sapiens GN=CSNK1A1 PE=1 SV=2 - [KC1A\_HUMAN]  
Q60684 Importin subunit alpha-7 OS=Homo sapiens GN=KPNAB PE=1 SV=1 - [IMA7\_HUMAN]  
P04062 Glucosylceramidase OS=Homo sapiens GN=GBA PE=1 SV=3 - [GLCM\_HUMAN]  
P62166 Neuronal calcium sensor 1 OS=Homo sapiens GN=NCS1 PE=1 SV=2 - [NCS1\_HUMAN]  
P23921 Ribonucleoside-diphosphate reductase large subunit OS=Homo sapiens GN=RRM1 PE=1 SV=1 - [RIR1\_HUMAN]  
Q9UBN2 COP9 signalosome complex subunit 3 OS=Homo sapiens GN=COPS3 PE=1 SV=3 - [CSN3\_HUMAN]  
Q13137 Calcium-binding and coiled-coil domain-containing protein 2 OS=Homo sapiens GN=CALCOCO2 PE=1 SV=1 - [CACO2\_HUMAN]  
Q92599 Septin-8 OS=Homo sapiens GN=SEPT8 PE=1 SV=4 - [SEPT8\_HUMAN]  
P50454 Serpin H1 OS=Homo sapiens GN=SERPINH1 PE=1 SV=2 - [SERPH\_HUMAN]  
P08253 72 kDa type IV collagenase OS=Homo sapiens GN=MMP2 PE=1 SV=2 - [DMP2\_HUMAN]  
Q00186 Syntaxin-binding protein 3 OS=Homo sapiens GN=STXB3 PE=1 SV=2 - [STXB3\_HUMAN]  
P61626 Lysozyme C OS=Homo sapiens GN=LYZ PE=1 SV=1 - [LYSC\_HUMAN]  
Q01780 Exosome component 10 OS=Homo sapiens GN=EXOSC10 PE=1 SV=2 - [EXOSX\_HUMAN]  
Q96MW5 Conserved oligomeric Golgi complex subunit 8 OS=Homo sapiens GN=COG8 PE=1 SV=2 - [COG8\_HUMAN]  
Q8TEQ6 Gem-associated protein 5 OS=Homo sapiens GN=GEMIN5 PE=1 SV=3 - [GEM15\_HUMAN]  
Q9UB09 Nuclear RNA export factor 1 OS=Homo sapiens GN=NXF1 PE=1 SV=1 - [NXF1\_HUMAN]  
Q9BTE3 Mini-chromosome maintenance complex-binding protein OS=Homo sapiens GN=MCMBP PE=1 SV=2 - [MCMBP\_HUMAN]  
Q60488 Long-chain-fatty-acid-CoA ligase 4 OS=Homo sapiens GN=ACSL4 PE=1 SV=2 - [ACSL4\_HUMAN]  
Q9NS15 Latent-transforming growth factor beta-binding protein 3 OS=Homo sapiens GN=LTPB3 PE=1 SV=4 - [LTBP3\_HUMAN]  
Q9NG65 Regulation of nuclear pre-mRNA domain-containing protein 1B OS=Homo sapiens GN=RPRD1B PE=1 SV=1 - [RPR1B\_HUMAN]

094973 AP-2 complex subunit alpha-2 OS=Homo sapiens GN=AP2A2 PE=1 SV=2 - [AP2A2\_HUMAN]  
099627 COP9 signalosome complex subunit 8 OS=Homo sapiens GN=COPS8 PE=1 SV=1 - [COPS8\_HUMAN]  
099NA0 Mediator of RNA polymerase II transcription subunit 9 OS=Homo sapiens GN=MED9 PE=1 SV=1 - [MED9\_HUMAN]  
0994L1 Hypoxia up-regulated protein 1 OS=Homo sapiens GN=HYOU1 PE=1 SV=1 - [HYOU1\_HUMAN]  
Q4LDE5 Sushi, von Willebrand factor type A, EGF and pentraxin domain-containing protein 1 OS=Homo sapiens GN=SVPE1 PE=1 SV=3 - [SVPE1\_HUMAN]  
043747 AP-1 complex subunit gamma-1 OS=Homo sapiens GN=AP1G1 PE=1 SV=5 - [AP1G1\_HUMAN]  
075787 Renin receptor OS=Homo sapiens GN=ATP6AP2 PE=1 SV=2 - [RENK\_HUMAN]  
Q9NP79 Vacuolar protein sorting-associated protein VTA1 homolog OS=Homo sapiens GN=VTA1 PE=1 SV=1 - [VTA1\_HUMAN]  
Q9NZ18 Insulin-like growth factor 2 mRNA-binding protein 1 OS=Homo sapiens GN=IGF2BP1 PE=1 SV=2 - [IGF2BP1\_HUMAN]  
Q9GZQ3 COMM domain-containing protein 5 OS=Homo sapiens GN=COMM5 PE=1 SV=1 - [COMM5\_HUMAN]  
P31689 DnaJ homolog subfamily A member 1 OS=Homo sapiens GN=DNAJ1 PE=1 SV=2 - [DNAJ1\_HUMAN]  
P84103 Serine/arginine-rich splicing factor 3 OS=Homo sapiens GN=SRSF3 PE=1 SV=1 - [SRSF3\_HUMAN]  
Q5BLP8 Neuropeptide-like protein 4orf48 OS=Homo sapiens GN=C4orf48 PE=1 SV=3 - [C4orf48\_HUMAN]  
Q90PU5 Ubiquitin carboxyl-terminal hydrolase 24 OS=Homo sapiens GN=USP24 PE=1 SV=3 - [UBP24\_HUMAN]  
095602 DNA-directed RNA polymerase I subunit RPA1 OS=Homo sapiens GN=POLR1A PE=1 SV=2 - [RPA1\_HUMAN]  
Q969J3 Loss of heterozygosity 12 chromosomal region 1 protein OS=Homo sapiens GN=LOH12CR1 PE=1 SV=1 - [L12R1\_HUMAN]  
P15311 Ezrin OS=Homo sapiens GN=EZR PE=1 SV=4 - [EZRI\_HUMAN]  
P36405 ADP-ribosylation factor-like protein 3 OS=Homo sapiens GN=ARL3 PE=1 SV=2 - [ARL3\_HUMAN]  
P35052 Glypican-1 OS=Homo sapiens GN=GPC1 PE=1 SV=2 - [GPC1\_HUMAN]  
P62847 40S ribosomal protein S24 OS=Homo sapiens GN=RPS24 PE=1 SV=1 - [RS24\_HUMAN]  
Q93008 Probable ubiquitin carboxyl-terminal hydrolase FAF-X OS=Homo sapiens GN=USP9X PE=1 SV=3 - [USP9X\_HUMAN]  
P15104 Glutamine synthetase OS=Homo sapiens GN=GLUL PE=1 SV=4 - [GLNA\_HUMAN]  
Q15291 Retinoblastoma-binding protein 5 OS=Homo sapiens GN=RBBP5 PE=1 SV=2 - [RBBP5\_HUMAN]  
P05141 ADP/ATP translocase 2 OS=Homo sapiens GN=SLC25A5 PE=1 SV=7 - [ADT2\_HUMAN]  
Q7L576 Cytoplasmic FMR1-interacting protein 1 OS=Homo sapiens GN=CYFIP1 PE=1 SV=1 - [CYFIP1\_HUMAN]  
P63092 Guanine nucleotide-binding protein (G(s) subunit alpha isoforms short OS=Homo sapiens GN=GNAS PE=1 SV=1 - [GNAS2\_HUMAN]  
P63027 Vesicle-associated membrane protein 2 OS=Homo sapiens GN=VAMP2 PE=1 SV=3 - [VAMP2\_HUMAN]  
060825 6-phosphofructo-2-kinase/fructose-2,6-bisphosphatase 2 OS=Homo sapiens GN=PFKFB2 PE=1 SV=2 - [P262\_HUMAN]  
A5YKK6 CCR4-NOT transcription complex subunit 1 OS=Homo sapiens GN=CNOT1 PE=1 SV=2 - [CNOT1\_HUMAN]  
Q9HAN9 Nicotinamide/nicotinic acid mononucleotide adenylyltransferase 1 OS=Homo sapiens GN=NMNAT1 PE=1 SV=1 - [NMNAT1\_HUMAN]  
P53990 IST1 homolog OS=Homo sapiens GN=ISTI PE=1 SV=1 - [ISTI\_HUMAN]  
Q9C005 Protein dpy-30 homolog OS=Homo sapiens GN=DPY30 PE=1 SV=1 - [DPY30\_HUMAN]  
P05455 Lupus La protein OS=Homo sapiens GN=SSB PE=1 SV=2 - [LA\_HUMAN]  
075153 Clustered mitochondria protein homolog OS=Homo sapiens GN=CLUH PE=1 SV=2 - [CLU\_HUMAN]  
P05067 Amyloid beta A4 protein OS=Homo sapiens GN=APP PE=1 SV=3 - [A4\_HUMAN]  
Q13418 Integrin-linked protein kinase OS=Homo sapiens GN=ILK PE=1 SV=2 - [ILK\_HUMAN]  
Q15056 Eukaryotic translation initiation factor 4H OS=Homo sapiens GN=EIF4H PE=1 SV=5 - [IF4H\_HUMAN]  
Q96EK6 Glucosamine 6-phosphate N-acetyltransferase OS=Homo sapiens GN=GPNAT1 PE=1 SV=1 - [GNAT1\_HUMAN]  
Q9NRW3 DNA dC->dU-editing enzyme APOBEC-3C OS=Homo sapiens GN=APOBEC3C PE=1 SV=2 - [ABC3C\_HUMAN]  
Q43681 ATPase ASNA1 OS=Homo sapiens GN=ASNA1 PE=1 SV=2 - [ASNA\_HUMAN]  
Q8NSN7 39S ribosomal protein L50, mitochondrial OS=Homo sapiens GN=MRPL50 PE=1 SV=2 - [RM50\_HUMAN]  
Q9V5U9 Immediate early response 3-interacting protein 1 OS=Homo sapiens GN=IER3IP1 PE=1 SV=1 - [IR3IP\_HUMAN]  
Q12974 Protein tyrosine phosphatase type IVA 2 OS=Homo sapiens GN=PTP4A2 PE=1 SV=1 - [TP4A2\_HUMAN]  
Q14145 Kelch-like ECH-associated protein 1 OS=Homo sapiens GN=KEAP1 PE=1 SV=2 - [KEAP1\_HUMAN]  
Q8NCA5 Protein FAM98A OS=Homo sapiens GN=FAM98A PE=1 SV=1 - [FA98A\_HUMAN]  
Q01469 Fatty acid-binding protein, epidermal OS=Homo sapiens GN=FABP5 PE=1 SV=3 - [FABP5\_HUMAN]  
Q43660 Pleiotropic regulator 1 OS=Homo sapiens GN=PLRG1 PE=1 SV=1 - [PLRG1\_HUMAN]  
Q96QK1 Vacuolar protein sorting-associated protein 35 OS=Homo sapiens GN=VPS35 PE=1 SV=2 - [VPS35\_HUMAN]  
Q12788 Transducin beta-like protein 3 OS=Homo sapiens GN=TBL3 PE=1 SV=2 - [TBL3\_HUMAN]  
Q9Y5B9 FACT complex subunit SPT16 OS=Homo sapiens GN=SPT16H PE=1 SV=1 - [SPT16H\_HUMAN]  
Q08945 FACT complex subunit SSRP1 OS=Homo sapiens GN=SSRP1 PE=1 SV=1 - [SSRP1\_HUMAN]  
Q86V97 Kelch repeat and BTB domain-containing protein 6 OS=Homo sapiens GN=KBTBD6 PE=1 SV=1 - [KBTBD6\_HUMAN]  
Q15233 Non-POU domain-containing octamer-binding protein OS=Homo sapiens GN=NONO PE=1 SV=4 - [NONO\_HUMAN]  
075534 Cold shock domain-containing protein E1 OS=Homo sapiens GN=CSDE1 PE=1 SV=2 - [CSDE1\_HUMAN]  
P53582 Methionine aminopeptidase 1 OS=Homo sapiens GN=METAP1 PE=1 SV=2 - [MAP11\_HUMAN]  
P12236 ADP/ATP translocase 3 OS=Homo sapiens GN=SLC25A6 PE=1 SV=4 - [ADT3\_HUMAN]  
Q00796 Sorbitol dehydrogenase OS=Homo sapiens GN=SORD PE=1 SV=4 - [DHSO\_HUMAN]  
Q9NUU7 ATP-dependent RNA helicase DDX19A OS=Homo sapiens GN=DDX19A PE=1 SV=1 - [DD19A\_HUMAN]  
Q9NW08 DNA-directed RNA polymerase III subunit RPC2 OS=Homo sapiens GN=POLR3B PE=1 SV=2 - [RPC2\_HUMAN]  
Q9HF4F SPARC-related modular calcium-binding protein 1 OS=Homo sapiens GN=SMOC1 PE=1 SV=1 - [SMOC1\_HUMAN]  
P09874 Poly [ADP-ribose] polymerase 1 OS=Homo sapiens GN=PARP1 PE=1 SV=4 - [PARP1\_HUMAN]  
P37108 Signal recognition particle 14 kDa protein OS=Homo sapiens GN=SRP14 PE=1 SV=2 - [SRP14\_HUMAN]  
Q14766 Latent-transforming growth factor beta-binding protein 1 OS=Homo sapiens GN=LTBP1 PE=1 SV=4 - [LTBP1\_HUMAN]  
Q9UBT2 SUMO-activating enzyme subunit 2 OS=Homo sapiens GN=UBA2 PE=1 SV=2 - [SAE2\_HUMAN]  
P35241 Radixin OS=Homo sapiens GN=RDX PE=1 SV=1 - [RADI\_HUMAN]  
Q16629 Serine/arginine-rich splicing factor 7 OS=Homo sapiens GN=SRSF7 PE=1 SV=1 - [SRSF7\_HUMAN]  
Q15075 Early endosome antigen 1 OS=Homo sapiens GN=EEA1 PE=1 SV=2 - [EEA1\_HUMAN]  
Q13126 S-methyl-5'-thioadenosine phosphorylase OS=Homo sapiens GN=MTAP PE=1 SV=2 - [MTAP\_HUMAN]  
Q96JBE Conserved oligomeric Golgi complex subunit 3 OS=Homo sapiens GN=COG3 PE=1 SV=3 - [COG3\_HUMAN]  
Q8NDZ4 Deleted in autism protein 1 OS=Homo sapiens GN=C3orf58 PE=1 SV=1 - [DIA1\_HUMAN]  
Q13242 Serine/arginine-rich splicing factor 9 OS=Homo sapiens GN=SRSF9 PE=1 SV=1 - [SRSF9\_HUMAN]  
Q9P0V9 Septin-10 OS=Homo sapiens GN=SEPT10 PE=1 SV=2 - [SEP10\_HUMAN]  
P52294 Impartin subunit alpha-5 OS=Homo sapiens GN=KPNA1 PE=1 SV=3 - [IMA5\_HUMAN]  
075487 Glypican-4 OS=Homo sapiens GN=GPC4 PE=1 SV=4 - [GPC4\_HUMAN]  
Q43390 Heterogeneous nuclear ribonucleoprotein R OS=Homo sapiens GN=HNRNPR PE=1 SV=1 - [HNRPR\_HUMAN]  
Q04917 14-3-3 protein eta OS=Homo sapiens GN=VHHAH PE=1 SV=4 - [1433F\_HUMAN]  
Q96EE3 Nucleoporin SEH1 OS=Homo sapiens GN=SEH1L PE=1 SV=3 - [SEH1\_HUMAN]  
Q96J01 THO complex subunit 3 OS=Homo sapiens GN=THOC3 PE=1 SV=1 - [THOC3\_HUMAN]  
Q99816 Tumor susceptibility gene 101 protein OS=Homo sapiens GN=TSG101 PE=1 SV=2 - [TS101\_HUMAN]  
Q9UKK9 ADP-sugar pyrophosphatase OS=Homo sapiens GN=NUDT5 PE=1 SV=1 - [NUDT5\_HUMAN]  
000159 Unconventional myosin-1c OS=Homo sapiens GN=MYO1C PE=1 SV=4 - [MYO1C\_HUMAN]  
P09936 Ubiquitin carboxyl-terminal hydrolase isozyme L1 OS=Homo sapiens GN=UCLH1 PE=1 SV=2 - [UCLH1\_HUMAN]  
Q14683 Structural maintenance of chromosomes protein 1A OS=Homo sapiens GN=SMC1A PE=1 SV=2 - [SMC1A\_HUMAN]  
015084 Serine/threonine-protein phosphatase 6 regulatory ankyrin repeat subunit A OS=Homo sapiens GN=ANKRD28 PE=1 SV=5 - [ANR28\_HUMAN]  
P46778 60S ribosomal protein L21 OS=Homo sapiens GN=RPL21 PE=1 SV=2 - [RL21\_HUMAN]  
P56377 AP-1 complex subunit sigma-2 OS=Homo sapiens GN=AP1S2 PE=1 SV=1 - [AP1S2\_HUMAN]  
P57678 Gem-associated protein 4 OS=Homo sapiens GN=GEMIN4 PE=1 SV=2 - [GEM14\_HUMAN]  
P20338 Ras-related protein Rab-4A OS=Homo sapiens GN=RAB4A PE=1 SV=3 - [RAB4A\_HUMAN]  
Q95347 Structural maintenance of chromosomes protein 2 OS=Homo sapiens GN=SMC2 PE=1 SV=2 - [SMC2\_HUMAN]  
Q86V82 Syntaxin-12 OS=Homo sapiens GN=STX12 PE=1 SV=1 - [STX12\_HUMAN]  
095336 6-phosphogluconolactonase OS=Homo sapiens GN=PGLS PE=1 SV=2 - [6PGL\_HUMAN]  
P04843 Dolichyl-diphosphooligosaccharide-protein glycosyltransferase subunit I OS=Homo sapiens GN=RPN1 PE=1 SV=1 - [RPN1\_HUMAN]  
P43487 Ran-specific GTPase-activating protein OS=Homo sapiens GN=RANBP1 PE=1 SV=1 - [RANG\_HUMAN]  
Q01518 Adenylyl cyclase-associated protein 1 OS=Homo sapiens GN=CAP1 PE=1 SV=5 - [CAP1\_HUMAN]  
Q9HA50 Protein Njmu-R1 OS=Homo sapiens GN=C17orf75 PE=1 SV=2 - [NJMU\_HUMAN]  
Q9UET6 Putative tRNA (cytidine(32)/guanosine(34)-2'-O)-methyltransferase OS=Homo sapiens GN=FTSJ1 PE=1 SV=2 - [TRM7\_HUMAN]  
P08237 ATP-dependent 6-phosphofructokinase, muscle type OS=Homo sapiens GN=PFKM PE=1 SV=2 - [PFKAM\_HUMAN]  
P55769 NHP2-like protein 1 OS=Homo sapiens GN=NHP2L1 PE=1 SV=3 - [NH2L1\_HUMAN]  
Q96KG9 N-terminal kinase-like protein OS=Homo sapiens GN=SCYL1 PE=1 SV=1 - [NTKL\_HUMAN]  
Q43447 Peptidyl-prolyl cis-trans isomerase H OS=Homo sapiens GN=PP1H PE=1 SV=1 - [PP1H\_HUMAN]  
P47897 Glutamine-tRNA ligase OS=Homo sapiens GN=QARS PE=1 SV=1 - [SQ\_HUMAN]  
Q60462 Neuropilin-2 OS=Homo sapiens GN=NRP2 PE=1 SV=2 - [NRP2\_HUMAN]  
Q57457 E3 ubiquitin-protein ligase UBR4 OS=Homo sapiens GN=UBR4 PE=1 SV=1 - [UBR4\_HUMAN]  
Q12933 TNF receptor-associated factor 2 OS=Homo sapiens GN=TRAF2 PE=1 SV=2 - [TRAF2\_HUMAN]  
Q9NXX6 Non-structural maintenance of chromosomes element 4 homolog A OS=Homo sapiens GN=NSMCE4A PE=1 SV=2 - [NSE4A\_HUMAN]  
Q9BPX5 Actin-related protein 2/3 complex subunit 5-like protein OS=Homo sapiens GN=ARPC5L PE=1 SV=1 - [ARPC5L\_HUMAN]  
P13861 cAMP-dependent protein kinase type II-alpha regulatory subunit OS=Homo sapiens GN=PRKAR2A PE=1 SV=2 - [KAP2\_HUMAN]  
Q14126 Desmoglein-2 OS=Homo sapiens GN=DSG2 PE=1 SV=2 - [DSG2\_HUMAN]  
Q53GT1 Kelch-like protein 22 OS=Homo sapiens GN=KLHL22 PE=1 SV=2 - [KLH22\_HUMAN]  
Q9Y244 Proteasome maturation protein OS=Homo sapiens GN=POMP PE=1 SV=1 - [POMP\_HUMAN]  
P06396 Gelsolin OS=Homo sapiens GN=GSN PE=1 SV=1 - [GELS\_HUMAN]  
P46736 Lys-63-specific deubiquitinase BRCC36 OS=Homo sapiens GN=BRCC3 PE=1 SV=2 - [BRCC3\_HUMAN]  
P62910 60S ribosomal protein L32 OS=Homo sapiens GN=RPL32 PE=1 SV=2 - [RL32\_HUMAN]  
Q9Y2V7 Conserved oligomeric Golgi complex subunit 6 OS=Homo sapiens GN=COG6 PE=1 SV=2 - [COG6\_HUMAN]  
Q9NP72 Ras-related protein Rab-18 OS=Homo sapiens GN=RAB18 PE=1 SV=1 - [RAB18\_HUMAN]



P45973 Chromobox protein homolog 5 OS=Homo sapiens GN=CBX5 PE=1 SV=1 - [CBX5\_HUMAN]  
P69905 Hemoglobin subunit alpha OS=Homo sapiens GN=HBA1 PE=1 SV=2 - [HBA\_HUMAN]  
Q9NKR7 BRCA1-A complex subunit BRE OS=Homo sapiens GN=BRE PE=1 SV=2 - [BRE\_HUMAN]  
Q9UL63 Muskelin OS=Homo sapiens GN=MKLN1 PE=1 SV=2 - [MKLN1\_HUMAN]  
Q9H900 Protein zwilch homolog OS=Homo sapiens GN=ZWILCH PE=1 SV=2 - [ZWILCH\_HUMAN]  
P07099 Epoxide hydrolase 1 OS=Homo sapiens GN=EPHX1 PE=1 SV=1 - [HYEP\_HUMAN]  
P50148 Guanine nucleotide-binding protein G(q) subunit alpha OS=Homo sapiens GN=GNAQ PE=1 SV=4 - [GNAQ\_HUMAN]  
O75832 26S proteasome non-ATPase regulatory subunit 10 OS=Homo sapiens GN=PSMD10 PE=1 SV=1 - [PSD10\_HUMAN]  
Q00577 Transcriptional activator protein Pur-alpha OS=Homo sapiens GN=PURA PE=1 SV=2 - [PURA\_HUMAN]  
000178 GTP-binding protein 1 OS=Homo sapiens GN=GTPBP1 PE=1 SV=3 - [GTPB1\_HUMAN]  
O15318 DNA-directed RNA polymerase III subunit RPC7 OS=Homo sapiens GN=POLR3G PE=1 SV=2 - [RPC7\_HUMAN]  
P34932 Heat shock 70 kDa protein 4 OS=Homo sapiens GN=HSPA4 PE=1 SV=4 - [HSP74\_HUMAN]  
Q9NT22 EMILIN-3 OS=Homo sapiens GN=EMILIN3 PE=2 SV=2 - [EMIL3\_HUMAN]  
000471 Exocyst complex component 5 OS=Homo sapiens GN=EXOC5 PE=1 SV=1 - [EXOC5\_HUMAN]  
P30046 D-dopachrome decarboxylase OS=Homo sapiens GN=DDT PE=1 SV=3 - [DOPD\_HUMAN]  
Q6YHK3 CD109 antigen OS=Homo sapiens GN=CD109 PE=1 SV=2 - [CD109\_HUMAN]  
P09661 U2 small nuclear ribonucleoprotein A' OS=Homo sapiens GN=SNRPA1 PE=1 SV=2 - [RU2A\_HUMAN]  
Q9H0A8 COMM domain-containing protein 4 OS=Homo sapiens GN=COMM4 PE=1 SV=1 - [COMM4\_HUMAN]  
P62753 40S ribosomal protein S6 OS=Homo sapiens GN=RPS6 PE=1 SV=1 - [RS6\_HUMAN]  
Q9H0E2 Toll-interacting protein OS=Homo sapiens GN=TOLLIP PE=1 SV=1 - [TOLLIP\_HUMAN]  
P13489 Ribonuclease inhibitor OS=Homo sapiens GN=RNHI PE=1 SV=2 - [RINI\_HUMAN]  
P09429 High mobility group protein B1 OS=Homo sapiens GN=HMGB1 PE=1 SV=3 - [HMGB1\_HUMAN]  
P55795 Heterogeneous nuclear ribonucleoprotein H2 OS=Homo sapiens GN=HNRNPH2 PE=1 SV=1 - [HNRH2\_HUMAN]  
Q32P28 Prolyl 3-hydroxylase 1 OS=Homo sapiens GN=LPRE1 PE=1 SV=2 - [P3H1\_HUMAN]  
Q9H4V0 Guanine nucleotide-binding protein subunit beta-4 OS=Homo sapiens GN=GNB4 PE=1 SV=3 - [GNB4\_HUMAN]  
O00629 Importin subunit alpha-3 OS=Homo sapiens GN=KPNAA4 PE=1 SV=1 - [IMA3\_HUMAN]  
P19387 DNA-directed RNA polymerase II subunit RPB3 OS=Homo sapiens GN=POLR2C PE=1 SV=2 - [RPB3\_HUMAN]  
P41240 Tyrosine-protein kinase CSK OS=Homo sapiens GN=CSK PE=1 SV=1 - [CSK\_HUMAN]  
Q99733 Nucleosome assembly protein 1-like 4 OS=Homo sapiens GN=NAP1L4 PE=1 SV=1 - [NP1L4\_HUMAN]  
O75533 Splicing factor 3B subunit 1 OS=Homo sapiens GN=SF3B1 PE=1 SV=3 - [SF3B1\_HUMAN]  
Q9BY43 Charged multivesicular body protein 4a OS=Homo sapiens GN=CHMP4A PE=1 SV=3 - [CHM4A\_HUMAN]  
Q92973 Transportin-1 OS=Homo sapiens GN=TNPO1 PE=1 SV=2 - [TNPO1\_HUMAN]  
P30154 Serine/threonine-protein phosphatase 2A 65 kDa regulatory subunit A beta isoform OS=Homo sapiens GN=PPP2R1B PE=1 SV=3 - [2AAB\_HUMAN]  
Q9NR12 PDZ and LIM domain protein 7 OS=Homo sapiens GN=PDZLIM7 PE=1 SV=1 - [PDZLIM7\_HUMAN]  
P41223 Protein BUD31 homolog OS=Homo sapiens GN=BUD31 PE=1 SV=2 - [BUD31\_HUMAN]  
P35580 Myosin-10 OS=Homo sapiens GN=MYH10 PE=1 SV=3 - [MYH10\_HUMAN]  
Q9Y314 Nitric oxide synthase-interacting protein OS=Homo sapiens GN=NOSIP PE=1 SV=1 - [NOSIP\_HUMAN]  
P11172 Uridine 5'-monophosphate synthase OS=Homo sapiens GN=UMPS PE=1 SV=1 - [UMPS\_HUMAN]  
P61201 COP9 signalosome complex subunit 2 OS=Homo sapiens GN=COPS2 PE=1 SV=1 - [CSN2\_HUMAN]  
P67809 Nuclease-sensitive element-binding protein 1 OS=Homo sapiens GN=YBX1 PE=1 SV=3 - [YBOX1\_HUMAN]  
Q93096 Protein tyrosine phosphatase type IVA 1 OS=Homo sapiens GN=PTP4A1 PE=1 SV=2 - [TP4A1\_HUMAN]  
AOAVF1 Intraflagellar transport protein 56 OS=Homo sapiens GN=ITTC26 PE=2 SV=1 - [IFT56\_HUMAN]  
P46776 60S ribosomal protein L27a OS=Homo sapiens GN=RPL27A PE=1 SV=2 - [RL27A\_HUMAN]  
Q9UHB9 Signal recognition particle subunit SRP68 OS=Homo sapiens GN=SRP68 PE=1 SV=2 - [SRP68\_HUMAN]  
Q8WV9 Heterogeneous nuclear ribonucleoprotein L-like OS=Homo sapiens GN=HNRNPLL PE=1 SV=1 - [HNRLL\_HUMAN]  
Q9H0F7 ADP-ribosylation factor-like protein 6 OS=Homo sapiens GN=ARL6 PE=1 SV=1 - [ARL6\_HUMAN]  
Q9NVJ2 ADP-ribosylation factor-like protein 8B OS=Homo sapiens GN=ARL8B PE=1 SV=1 - [ARL8B\_HUMAN]  
P43246 DNA mismatch repair protein Msh2 OS=Homo sapiens GN=MSH2 PE=1 SV=1 - [MSH2\_HUMAN]  
O75818 Ribonuclease P protein subunit p40 OS=Homo sapiens GN=RPP40 PE=1 SV=3 - [RPP40\_HUMAN]  
Q9NM64 Pre-mRNA-splicing factor RBM22 OS=Homo sapiens GN=RBM22 PE=1 SV=1 - [RBM22\_HUMAN]  
Q96G65 SWI/SNF-related matrix-associated actin-dependent regulator of chromatin subfamily D member 1 OS=Homo sapiens GN=SMARCD1 PE=1 SV=2 - [SMRCD1\_HUMAN]  
Q961V0 Pentyl-(N(4)-(N-acetyl-beta-D-glucosaminyl)asparagine amidase OS=Homo sapiens GN=NGLY1 PE=1 SV=1 - [NGLY1\_HUMAN]  
Q9H944 Mediator of RNA polymerase II transcription subunit 20 OS=Homo sapiens GN=MED20 PE=1 SV=1 - [MED20\_HUMAN]  
Q9UBS4 DnaJ homolog subfamily B member 11 OS=Homo sapiens GN=DNAJB11 PE=1 SV=1 - [DJB11\_HUMAN]  
P00374 Dihydrofolate reductase OS=Homo sapiens GN=DHFR PE=1 SV=2 - [DYR\_HUMAN]  
P02788 Lactotransferrin OS=Homo sapiens GN=LTF PE=1 SV=6 - [TRFL\_HUMAN]  
Q14152 Eukaryotic translation initiation factor 3 subunit A OS=Homo sapiens GN=EIF3A PE=1 SV=1 - [EIF3A\_HUMAN]  
Q6P597 Eukaryotic light chain 3 OS=Homo sapiens GN=KLC3 PE=1 SV=2 - [KLC3\_HUMAN]  
Q9UKB1 F-box/WD repeat-containing protein 11 OS=Homo sapiens GN=FBXW11 PE=1 SV=1 - [FBW11\_HUMAN]  
Q9NT62 Ubiquitin-like-conjugating enzyme ATG3 OS=Homo sapiens GN=ATG3 PE=1 SV=1 - [ATG3\_HUMAN]  
P24928 DNA-directed RNA polymerase II subunit RPB1 OS=Homo sapiens GN=POLR2A PE=1 SV=2 - [RPB1\_HUMAN]  
Q641Q3 Meteorin-like protein OS=Homo sapiens GN=METRLN PE=2 SV=1 - [METRLN\_HUMAN]  
Q9H2M9 Rab3 GTPase-activating protein non-catalytic subunit OS=Homo sapiens GN=RAB3GAP2 PE=1 SV=1 - [RBGPR\_HUMAN]  
P41227 N-alpha-acetyltransferase 10 OS=Homo sapiens GN=NAA10 PE=1 SV=1 - [NAA10\_HUMAN]  
Q9NVX0 HAU5 acguin-like complex subunit 2 OS=Homo sapiens GN=HAUS2 PE=1 SV=1 - [HAUS2\_HUMAN]  
P13667 Protein disulfide-isomerase A4 OS=Homo sapiens GN=PDIA4 PE=1 SV=2 - [PDIA4\_HUMAN]  
P21741 Midkine OS=Homo sapiens GN=MDK PE=1 SV=1 - [MK\_HUMAN]  
P52701 DNA mismatch repair protein Msh6 OS=Homo sapiens GN=MSH6 PE=1 SV=2 - [MSH6\_HUMAN]  
Q9P2R3 Rabankyrin-5 OS=Homo sapiens GN=ANKFY1 PE=1 SV=2 - [ANFY1\_HUMAN]  
P07910 Heterogeneous nuclear ribonucleoproteins C1/C2 OS=Homo sapiens GN=HNRNCP PE=1 SV=4 - [HNRPC\_HUMAN]  
P35250 Replication factor C subunit 2 OS=Homo sapiens GN=RFC2 PE=1 SV=3 - [RFC2\_HUMAN]  
P49770 Translation initiation factor eIF-2B subunit beta OS=Homo sapiens GN=EIF2B2 PE=1 SV=3 - [E12BB\_HUMAN]  
Q6P169 Tripartite motif-containing protein 65 OS=Homo sapiens GN=TRIM65 PE=1 SV=3 - [TRI65\_HUMAN]  
P62854 40S ribosomal protein S26 OS=Homo sapiens GN=RPS26 PE=1 SV=3 - [RS26\_HUMAN]  
Q13425 Beta-2-syntrophin OS=Homo sapiens GN=SNTR2 PE=1 SV=1 - [SNTR2\_HUMAN]  
000401 Neural Wiskott-Aldrich syndrome protein OS=Homo sapiens GN=WASL PE=1 SV=2 - [WASL\_HUMAN]  
Q63HQ2 Pikachurin OS=Homo sapiens GN=EGFLAM PE=1 SV=2 - [EGFLA\_HUMAN]  
Q92890 Ubiquitin fusion degradation protein 1 homolog OS=Homo sapiens GN=UFD1L PE=1 SV=3 - [UFD1\_HUMAN]  
Q9NV11 Fanconi anemia group I protein OS=Homo sapiens GN=FANCI PE=1 SV=4 - [FANCI\_HUMAN]  
O00622 Protein CYR61 OS=Homo sapiens GN=CYR61 PE=1 SV=1 - [CYR61\_HUMAN]  
Q14554 Protein disulfide-isomerase A5 OS=Homo sapiens GN=PDIA5 PE=1 SV=1 - [PDIA5\_HUMAN]  
P26358 DNA (cytosine-5)-methyltransferase 1 OS=Homo sapiens GN=DNMT1 PE=1 SV=2 - [DNMT1\_HUMAN]  
P50748 Kinetochores-associated protein 1 OS=Homo sapiens GN=KNTC1 PE=1 SV=1 - [KNTC1\_HUMAN]  
Q10570 Cleavage and polyadenylation specificity factor subunit 1 OS=Homo sapiens GN=CPSF1 PE=1 SV=2 - [CPSF1\_HUMAN]  
Q9H299 SH3 domain-binding glutamic acid-rich-like protein 3 OS=Homo sapiens GN=SH3BGLR3 PE=1 SV=1 - [SH3L3\_HUMAN]  
Q9Y5K8 V-type proton ATPase subunit D OS=Homo sapiens GN=ATP6V1D PE=1 SV=1 - [VATD\_HUMAN]  
Q13332 Receptor-type tyrosine-protein phosphatase S OS=Homo sapiens GN=PTPRS PE=1 SV=3 - [PTPRS\_HUMAN]  
Q13630 GDP-L-fucose synthase OS=Homo sapiens GN=TSTA3 PE=1 SV=1 - [FCL\_HUMAN]  
Q09161 Nuclear cap-binding protein subunit 1 OS=Homo sapiens GN=NCBP1 PE=1 SV=1 - [NCBP1\_HUMAN]  
Q15631 Translin OS=Homo sapiens GN=TSN PE=1 SV=1 - [TSN\_HUMAN]  
Q9Y508 E3 ubiquitin-protein ligase RNF114 OS=Homo sapiens GN=RNF114 PE=1 SV=1 - [RNF114\_HUMAN]  
Q9NTJ3 Structural maintenance of chromosomes protein 4 OS=Homo sapiens GN=SMC4 PE=1 SV=2 - [SMC4\_HUMAN]  
Q9NZ23 Charged multivesicular body protein 5 OS=Homo sapiens GN=CHMP5 PE=1 SV=1 - [CHMP5\_HUMAN]  
O14929 Histone acetyltransferase type B catalytic subunit OS=Homo sapiens GN=HAT1 PE=1 SV=1 - [HAT1\_HUMAN]  
P40429 60S ribosomal protein L13a OS=Homo sapiens GN=RPL13A PE=1 SV=2 - [RL13A\_HUMAN]  
Q9NRN5 O1factomedin-like protein 3 OS=Homo sapiens GN=OLFML3 PE=2 SV=1 - [OLFPL3\_HUMAN]  
Q15386 Ubiquitin-protein ligase E3C OS=Homo sapiens GN=UBE3C PE=1 SV=3 - [UBE3C\_HUMAN]  
Q15645 Pachytene checkpoint protein 2 homolog OS=Homo sapiens GN=TRIP13 PE=1 SV=2 - [PCH2\_HUMAN]  
Q9ULV4 Coronin-1C OS=Homo sapiens GN=COR1C PE=1 SV=1 - [COR1C\_HUMAN]  
P59768 Guanine nucleotide-binding protein G(I)/G(S)/G(O) subunit gamma-2 OS=Homo sapiens GN=GNG2 PE=1 SV=2 - [GBG2\_HUMAN]  
Q2TAY7 WD40 repeat-containing protein SMU1 OS=Homo sapiens GN=SMU1 PE=1 SV=2 - [SMU1\_HUMAN]  
P04632 Calpain small subunit 1 OS=Homo sapiens GN=CAPNS1 PE=1 SV=1 - [CPNS1\_HUMAN]  
Q8NBZ7 UDP-glucuronic acid decarboxylase 1 OS=Homo sapiens GN=UXS1 PE=1 SV=1 - [UXS1\_HUMAN]  
O14802 DNA-directed RNA polymerase III subunit RPC1 OS=Homo sapiens GN=POLR3A PE=1 SV=2 - [RPC1\_HUMAN]  
O15145 Actin-related protein 2/3 complex subunit 3 OS=Homo sapiens GN=ARPC3 PE=1 SV=3 - [ARPC3\_HUMAN]  
Q95456 Proteasome assembly chaperone 1 OS=Homo sapiens GN=PSMG1 PE=1 SV=1 - [PSMG1\_HUMAN]  
Q72478 ATP-dependent RNA helicase DHX29 OS=Homo sapiens GN=DHX29 PE=1 SV=2 - [DHX29\_HUMAN]  
P26599 Polypyrimidine tract-binding protein 1 OS=Homo sapiens GN=PTBP1 PE=1 SV=1 - [PTBP1\_HUMAN]  
Q99963 Endophilin-A3 OS=Homo sapiens GN=SH3GL3 PE=1 SV=1 - [SH3G3\_HUMAN]  
Q0PNE2 Elongator complex protein 6 OS=Homo sapiens GN=ELP6 PE=1 SV=1 - [ELP6\_HUMAN]  
O00203 AP-3 complex subunit beta-1 OS=Homo sapiens GN=AP3B1 PE=1 SV=3 - [AP3B1\_HUMAN]  
Q3MHD2 Protein LSM12 homolog OS=Homo sapiens GN=LSM12 PE=1 SV=2 - [LSM12\_HUMAN]  
Q9Y624 Junctional adhesion molecule A OS=Homo sapiens GN=F11R PE=1 SV=1 - [JAM1\_HUMAN]  
O75116 Rho-associated protein kinase 2 OS=Homo sapiens GN=ROCK2 PE=1 SV=4 - [ROCK2\_HUMAN]  
Q58EX2 Protein sidekick-2 OS=Homo sapiens GN=SDK2 PE=1 SV=3 - [SDK2\_HUMAN]

075054 Immunoglobulin superfamily member 3 OS=Homo sapiens GN=IGSF3 PE=2 SV=3 - [IGSF3\_HUMAN]  
096511 BTB/POZ domain-containing protein KCTD15 OS=Homo sapiens GN=KCTD15 PE=1 SV=1 - [KCTD15\_HUMAN]  
043795 Unconventional myosin-1b OS=Homo sapiens GN=MYO1B PE=1 SV=3 - [MYO1B\_HUMAN]  
074285 Transcription elongation factor SPT6 OS=Homo sapiens GN=SPT6H PE=1 SV=2 - [SPT6H\_HUMAN]  
096158 Beta-1,3-galactosyltransferase 6 OS=Homo sapiens GN=B3GALT6 PE=1 SV=2 - [B3GALT6\_HUMAN]  
09NU05 Zinc finger CCHC domain-containing protein 3 OS=Homo sapiens GN=ZCCHC3 PE=1 SV=1 - [ZCCHC3\_HUMAN]  
051812 Ribosomal protein S6 kinase alpha-3 OS=Homo sapiens GN=RPS6KA3 PE=1 SV=1 - [RPS6KA3\_HUMAN]  
09URK8 General transcription factor 3C polypeptide 4 OS=Homo sapiens GN=TF3C4 PE=1 SV=2 - [TF3C4\_HUMAN]  
P00966 Argininosuccinate synthase OS=Homo sapiens GN=ASS1 PE=1 SV=2 - [ASSY\_HUMAN]  
P06737 Glycogen phosphorylase, liver form OS=Homo sapiens GN=PYGL PE=1 SV=4 - [PYGL\_HUMAN]  
P83731 60S ribosomal protein L24 OS=Homo sapiens GN=RPL24 PE=1 SV=1 - [RPL24\_HUMAN]  
Q13409 Cytoplasmic dynein 1 intermediate chain 2 OS=Homo sapiens GN=DYNC1I2 PE=1 SV=3 - [DC1I2\_HUMAN]  
Q9BPX3 Condensin complex subunit 3 OS=Homo sapiens GN=NCAPG PE=1 SV=1 - [CND3\_HUMAN]  
Q92734 Protein TFG OS=Homo sapiens GN=TFG PE=1 SV=2 - [TFG\_HUMAN]  
095801 Tetratricopeptide repeat protein 4 OS=Homo sapiens GN=TTCA PE=1 SV=3 - [TTCA\_HUMAN]  
P09211 Glutathione S-transferase P OS=Homo sapiens GN=GSTP1 PE=1 SV=2 - [GSTP1\_HUMAN]  
Q9Y3U8 60S ribosomal protein L36 OS=Homo sapiens GN=RPL36 PE=1 SV=3 - [RPL36\_HUMAN]  
043172 U4/U6 small nuclear ribonucleoprotein Prp4 OS=Homo sapiens GN=PRPF4 PE=1 SV=2 - [PRPF4\_HUMAN]  
P20585 DNA mismatch repair protein Msh3 OS=Homo sapiens GN=MSH3 PE=1 SV=4 - [MSH3\_HUMAN]  
Q15382 GTP-binding protein Rheb OS=Homo sapiens GN=RHEB PE=1 SV=1 - [RHEB\_HUMAN]  
Q99623 Prohibitin-2 OS=Homo sapiens GN=PHB2 PE=1 SV=2 - [PHB2\_HUMAN]  
Q13131 5'-AMP-activated protein kinase catalytic subunit alpha-1 OS=Homo sapiens GN=PRKAA1 PE=1 SV=4 - [AAPK1\_HUMAN]  
P62899 60S ribosomal protein L31 OS=Homo sapiens GN=RPL31 PE=1 SV=1 - [RPL31\_HUMAN]  
Q1KMD3 Heterogeneous nuclear ribonucleoprotein U-like protein 2 OS=Homo sapiens GN=HNRNPUL2 PE=1 SV=1 - [HNR12\_HUMAN]  
Q8N3U4 Cohesin subunit SA-2 OS=Homo sapiens GN=STAG2 PE=1 SV=3 - [STAG2\_HUMAN]  
P31350 Ribonucleoside-diphosphate reductase subunit M2 OS=Homo sapiens GN=RRM2 PE=1 SV=1 - [RIR2\_HUMAN]  
095084 Serine protease 23 OS=Homo sapiens GN=PRSS23 PE=2 SV=1 - [PRSS23\_HUMAN]  
Q68CQ4 Digestive organ expansion factor homolog OS=Homo sapiens GN=DIEXF PE=1 SV=2 - [DIEXF\_HUMAN]  
P49458 Signal recognition particle 9 kDa protein OS=Homo sapiens GN=SRP9 PE=1 SV=2 - [SRP9\_HUMAN]  
Q14011 Cold-inducible RNA-binding protein OS=Homo sapiens GN=CIRBP PE=1 SV=1 - [CIRBP\_HUMAN]  
P07686 Beta-hexosaminidase subunit beta OS=Homo sapiens GN=HEXB PE=1 SV=3 - [HEXB\_HUMAN]  
060573 Eukaryotic translation initiation factor 4E type 2 OS=Homo sapiens GN=EIF4E2 PE=1 SV=1 - [EIF4E2\_HUMAN]  
Q9H270 Vacuolar protein sorting-associated protein 11 homolog OS=Homo sapiens GN=VPS11 PE=1 SV=1 - [VPS11\_HUMAN]  
Q9UBW8 COP9 signalosome complex subunit 7a OS=Homo sapiens GN=COPS7A PE=1 SV=1 - [CNS7A\_HUMAN]  
P53992 Protein transport protein Sec24C OS=Homo sapiens GN=SEC24C PE=1 SV=3 - [SEC24C\_HUMAN]  
Q9H4V4 Exportin-5 OS=Homo sapiens GN=XPO5 PE=1 SV=1 - [XPO5\_HUMAN]  
P52597 Heterogeneous nuclear ribonucleoprotein F OS=Homo sapiens GN=HNRNPF PE=1 SV=3 - [HNRNPF\_HUMAN]  
Q13555 Calcium/calmodulin-dependent protein kinase type II subunit gamma OS=Homo sapiens GN=CAMK2G PE=1 SV=3 - [KCC2G\_HUMAN]  
043237 Cytoplasmic dynein 1 light intermediate chain 2 OS=Homo sapiens GN=DYNC1L2 PE=1 SV=1 - [DC1L2\_HUMAN]  
P61081 NEDD8-conjugating enzyme Ubc12 OS=Homo sapiens GN=UBE2M PE=1 SV=1 - [UBC12\_HUMAN]  
Q92896 Golgi apparatus protein 1 OS=Homo sapiens GN=GLG1 PE=1 SV=2 - [GSLG1\_HUMAN]  
014786 Neuropilin-1 OS=Homo sapiens GN=NRP1 PE=1 SV=3 - [NRP1\_HUMAN]  
Q9P253 Vacuolar protein sorting-associated protein 18 homolog OS=Homo sapiens GN=VPS18 PE=1 SV=2 - [VPS18\_HUMAN]  
P36507 Dual specificity mitogen-activated protein kinase kinase 2 OS=Homo sapiens GN=MAP2K2 PE=1 SV=1 - [MP2K2\_HUMAN]  
P51809 Vesicle-associated membrane protein 7 OS=Homo sapiens GN=VAMP7 PE=1 SV=3 - [VAMP7\_HUMAN]  
Q01081 Splicing factor U2AF 35 kDa subunit OS=Homo sapiens GN=U2AF1 PE=1 SV=3 - [U2AF1\_HUMAN]  
Q9Y478 5'-AMP-activated protein kinase subunit beta-1 OS=Homo sapiens GN=PRKAB1 PE=1 SV=4 - [AAKB1\_HUMAN]  
Q92538 Golgi-specific brefeldin A-resistance guanine nucleotide exchange factor 1 OS=Homo sapiens GN=GBF1 PE=1 SV=2 - [GBF1\_HUMAN]  
Q9BZD4 Kinetochore protein Nuf2 OS=Homo sapiens GN=NUF2 PE=1 SV=2 - [NUF2\_HUMAN]  
P68871 Hemoglobin subunit beta OS=Homo sapiens GN=HBB PE=1 SV=2 - [HBB\_HUMAN]  
Q965Y0 von Willebrand factor A domain-containing protein 9 OS=Homo sapiens GN=VWA9 PE=1 SV=2 - [VWA9\_HUMAN]  
Q9BXJ9 N-alpha-acetyltransferase 15, NATA auxiliary subunit OS=Homo sapiens GN=NAA15 PE=1 SV=1 - [NAA15\_HUMAN]  
Q9UNX4 WD repeat-containing protein 3 OS=Homo sapiens GN=WDR3 PE=1 SV=1 - [WDR3\_HUMAN]  
Q15198 Platelet-derived growth factor receptor-like protein OS=Homo sapiens GN=PDGFRL PE=1 SV=1 - [PGFRL\_HUMAN]  
Q9Y4R8 Telomere length regulation protein TEL2 homolog OS=Homo sapiens GN=TELO2 PE=1 SV=2 - [TELO2\_HUMAN]  
Q02878 60S ribosomal protein L6 OS=Homo sapiens GN=RPL6 PE=1 SV=3 - [RPL6\_HUMAN]  
043663 Protein regulator of cytokinesis 1 OS=Homo sapiens GN=PRC1 PE=1 SV=2 - [PRC1\_HUMAN]  
076061 Stannocalcin-2 OS=Homo sapiens GN=STC2 PE=1 SV=1 - [STC2\_HUMAN]  
P15735 Phosphorylase b kinase gamma catalytic chain, liver/testis isoform OS=Homo sapiens GN=PHKG2 PE=1 SV=1 - [PHKG2\_HUMAN]  
Q9BP06 Dihydropyrimidinase-related protein 5 OS=Homo sapiens GN=DPYSL5 PE=1 SV=1 - [DPYSL5\_HUMAN]  
014965 Aurora kinase A OS=Homo sapiens GN=AURKA PE=1 SV=2 - [AURKA\_HUMAN]  
P35573 Glycogen debranching enzyme OS=Homo sapiens GN=AGL PE=1 SV=3 - [GDE\_HUMAN]  
075165 DnaJ homolog subfamily C member 13 OS=Homo sapiens GN=DNAJC13 PE=1 SV=5 - [DJC13\_HUMAN]  
Q9HCB6 Spodnon-1 OS=Homo sapiens GN=SPON1 PE=1 SV=2 - [SPON1\_HUMAN]  
P25685 DnaJ homolog subfamily B member 1 OS=Homo sapiens GN=DNAJB1 PE=1 SV=4 - [DNJB1\_HUMAN]  
P01857 Ig gamma-1 chain C region OS=Homo sapiens GN=IGHG1 PE=1 SV=1 - [IGHG1\_HUMAN]  
P47972 Neuronal pentraxin-2 OS=Homo sapiens GN=NPTX2 PE=1 SV=2 - [NPTX2\_HUMAN]  
075348 V-type proton ATPase subunit G 1 OS=Homo sapiens GN=ATP6V1G1 PE=1 SV=3 - [VATG1\_HUMAN]  
Q9NVZ3 Adaptin ear-binding coat-associated protein 2 OS=Homo sapiens GN=NECAP2 PE=1 SV=1 - [NECAP2\_HUMAN]  
Q67605 Autophagy-related protein 16-1 OS=Homo sapiens GN=ATG16L1 PE=1 SV=2 - [A16L1\_HUMAN]  
Q9BRT9 DNA replication complex GINS protein SLD5 OS=Homo sapiens GN=GINS4 PE=1 SV=1 - [SLD5\_HUMAN]  
Q9HD42 Charged multivesicular body protein 1a OS=Homo sapiens GN=CHMP1A PE=1 SV=1 - [CHMP1A\_HUMAN]  
Q10419 Coactosin-like protein OS=Homo sapiens GN=COTL1 PE=1 SV=3 - [COTL1\_HUMAN]  
075367 Core histone macro-H2A.1 OS=Homo sapiens GN=H2AFY1 PE=1 SV=4 - [H2AY\_HUMAN]  
075935 Dynactin subunit 3 OS=Homo sapiens GN=DCTN3 PE=1 SV=1 - [DCTN3\_HUMAN]  
Q8TBC3 SHKBP1-binding protein 1 OS=Homo sapiens GN=SHKBP1 PE=1 SV=2 - [SHKBP1\_HUMAN]  
Q9H269 Vacuolar protein sorting-associated protein 16 homolog OS=Homo sapiens GN=VPS16 PE=1 SV=2 - [VPS16\_HUMAN]  
Q15418 Ribosomal protein S6 kinase alpha-1 OS=Homo sapiens GN=RPS6KA1 PE=1 SV=2 - [KS6A1\_HUMAN]  
Q16181 Septin-7 OS=Homo sapiens GN=SEPT7 PE=1 SV=2 - [SEPT7\_HUMAN]  
Q8NCHO Carbohydrate sulfotransferase 14 OS=Homo sapiens GN=CHST14 PE=1 SV=2 - [CHSTE\_HUMAN]  
P22413 Ectonucleotide pyrophosphatase/phosphodiesterase family member 1 OS=Homo sapiens GN=ENPP1 PE=1 SV=2 - [ENPP1\_HUMAN]  
Q9NVC6 Mediator of RNA polymerase II transcription subunit 17 OS=Homo sapiens GN=MED17 PE=1 SV=2 - [MED17\_HUMAN]  
P51659 Peroxisomal multifunctional enzyme type 2 OS=Homo sapiens GN=HSD17B4 PE=1 SV=3 - [DHB4\_HUMAN]  
Q9B5D7 Cancer-related nucleoside-triphosphatase OS=Homo sapiens GN=NTPCR PE=1 SV=1 - [NTPCR\_HUMAN]  
Q9NWN5 WD repeat-containing protein 6 OS=Homo sapiens GN=WDR6 PE=1 SV=1 - [WDR6\_HUMAN]  
Q81283 Aldehyde dehydrogenase family 16 member A1 OS=Homo sapiens GN=ALDH16A1 PE=1 SV=2 - [A16A1\_HUMAN]  
Q15018 BRISC complex subunit Abro1 OS=Homo sapiens GN=FAM175B PE=1 SV=2 - [F175B\_HUMAN]  
Q8WTW3 Conserved oligomeric Golgi complex subunit 1 OS=Homo sapiens GN=COG1 PE=1 SV=1 - [COG1\_HUMAN]  
Q15042 Rab3 GTPase-activating protein catalytic subunit OS=Homo sapiens GN=RAB3GAP1 PE=1 SV=3 - [RB3GP\_HUMAN]  
Q68C76 HAUS augmin-like complex subunit 3 OS=Homo sapiens GN=HAUS3 PE=1 SV=1 - [HAUS3\_HUMAN]  
Q13501 Sequestosome-1 OS=Homo sapiens GN=SQSTM1 PE=1 SV=1 - [SQSTM\_HUMAN]  
Q13617 Cullin-2 OS=Homo sapiens GN=CUL2 PE=1 SV=2 - [CUL2\_HUMAN]  
P34096 Ribonuclease 4 OS=Homo sapiens GN=RNASE4 PE=1 SV=3 - [RNAS4\_HUMAN]  
P56282 DNA polymerase epsilon subunit 2 OS=Homo sapiens GN=POLE2 PE=1 SV=2 - [DPOE2\_HUMAN]  
Q9UHV9 Prefoldin subunit 2 OS=Homo sapiens GN=PPD2 PE=1 SV=1 - [PPD2\_HUMAN]  
Q86X34 Extracellular matrix protein FRAS1 OS=Homo sapiens GN=FRAS1 PE=1 SV=2 - [FRAS1\_HUMAN]  
Q9UNZ2 NSF1 cofactor p47 OS=Homo sapiens GN=NSFL1C PE=1 SV=2 - [NSFLC\_HUMAN]  
Q13283 Ras GTPase-activating protein-binding protein 1 OS=Homo sapiens GN=G3BP1 PE=1 SV=1 - [G3BP1\_HUMAN]  
Q86V81 THO complex subunit 4 OS=Homo sapiens GN=ALYREF PE=1 SV=3 - [THOC4\_HUMAN]  
Q9NP97 Dynein light chain roadblock-type 1 OS=Homo sapiens GN=DYNLRB1 PE=1 SV=3 - [DLR1\_HUMAN]  
Q9H974 Queuine tRNA-ribosyltransferase subunit QTRTD1 OS=Homo sapiens GN=QTRTD1 PE=1 SV=1 - [QTRD1\_HUMAN]  
015511 Actin-related protein 2/3 complex subunit 5 OS=Homo sapiens GN=ARPC5 PE=1 SV=3 - [ARPC5\_HUMAN]  
P53999 Activated RNA polymerase II transcriptional coactivator p15 OS=Homo sapiens GN=SUB1 PE=1 SV=3 - [TCP4\_HUMAN]  
Q13144 Translation initiation factor eIF-2B subunit epsilon OS=Homo sapiens GN=EIF2B5 PE=1 SV=3 - [E12BE\_HUMAN]  
Q13443 Disintegrin and metalloproteinase domain-containing protein 9 OS=Homo sapiens GN=ADAM9 PE=1 SV=1 - [ADAM9\_HUMAN]  
Q9BQ52 Zinc phosphodiesterase ELAC protein 2 OS=Homo sapiens GN=ELAC2 PE=1 SV=2 - [RNZ2\_HUMAN]  
Q86X12 Condensin-2 complex subunit G2 OS=Homo sapiens GN=NCAPG2 PE=1 SV=1 - [CNDG2\_HUMAN]  
Q9UBC2 Epidermal growth factor receptor substrate 15-like 1 OS=Homo sapiens GN=EPS15L1 PE=1 SV=1 - [EP15R\_HUMAN]  
Q14C86 GTPase-activating protein and VPS9 domain-containing protein 1 OS=Homo sapiens GN=GAPVD1 PE=1 SV=2 - [GAPD1\_HUMAN]  
P25788 Proteasome subunit alpha type-3 OS=Homo sapiens GN=PSMA3 PE=1 SV=2 - [PSA3\_HUMAN]  
Q96N67 Dedicator of cytokinesis protein 7 OS=Homo sapiens GN=DOCK7 PE=1 SV=4 - [DOCK7\_HUMAN]  
Q9Y4P1 Cysteine protease ATG4B OS=Homo sapiens GN=ATG4B PE=1 SV=2 - [ATG4B\_HUMAN]  
060216 Double-strand-break repair protein rad21 homolog OS=Homo sapiens GN=RAD21 PE=1 SV=2 - [RAD21\_HUMAN]  
P25705 ATP synthase subunit alpha, mitochondrial OS=Homo sapiens GN=ATP5A1 PE=1 SV=1 - [ATPA\_HUMAN]  
P63220 40S ribosomal protein S21 OS=Homo sapiens GN=RPS21 PE=1 SV=1 - [RS21\_HUMAN]

Q9UKG1 DCC-interacting protein 13-alpha OS=Homo sapiens GN=APPL1 PE=1 SV=1 - [DP13A\_HUMAN]  
Q92797 Sympkin OS=Homo sapiens GN=SYMPK PE=1 SV=2 - [SYMPK\_HUMAN]  
Q9UL25 Ras-related protein Rab-21 OS=Homo sapiens GN=RAB21 PE=1 SV=3 - [RAB21\_HUMAN]  
P55265 Double-stranded RNA-specific adenosine deaminase OS=Homo sapiens GN=ADAR PE=1 SV=4 - [DSRAD\_HUMAN]  
015111 Inhibitor of nuclear factor kappa-B kinase subunit alpha OS=Homo sapiens GN=CHUK PE=1 SV=2 - [IKKA\_HUMAN]  
Q8N1G2 Cap-specific mRNA (nucleoside-2'-O)-methyltransferase 1 OS=Homo sapiens GN=CMTR1 PE=1 SV=1 - [CMTR1\_HUMAN]  
Q9H1D9 DNA-directed RNA polymerase III subunit RPC6 OS=Homo sapiens GN=POLR3F PE=1 SV=1 - [RPC6\_HUMAN]  
014617 AP-3 complex subunit delta-1 OS=Homo sapiens GN=AP3D1 PE=1 SV=1 - [AP3D1\_HUMAN]  
Q96FE6 F-box only protein 17 OS=Homo sapiens GN=FBXO17 PE=1 SV=1 - [FBX17\_HUMAN]  
Q9BT25 HAUS augmin-like complex subunit 8 OS=Homo sapiens GN=HAUS8 PE=1 SV=3 - [HAUS8\_HUMAN]  
Q9NRW7 Vacuolar protein sorting-associated protein 45 OS=Homo sapiens GN=VPS45 PE=1 SV=1 - [VPS45\_HUMAN]  
P04818 Thymidylate synthase OS=Homo sapiens GN=TYMS PE=1 SV=3 - [TYSY\_HUMAN]  
Q6PJG6 BRCA1-associated ATM activator 1 OS=Homo sapiens GN=BRAT1 PE=1 SV=2 - [BRAT1\_HUMAN]  
P07195 L-lactate dehydrogenase B chain OS=Homo sapiens GN=LDHB PE=1 SV=2 - [LDHB\_HUMAN]  
P46109 Crk-like protein OS=Homo sapiens GN=CRKL PE=1 SV=1 - [CRKL\_HUMAN]  
P50995 Annexin A11 OS=Homo sapiens GN=ANXA11 PE=1 SV=1 - [ANX11\_HUMAN]  
P52788 Spermine synthase OS=Homo sapiens GN=SMS PE=1 SV=2 - [SPSY\_HUMAN]  
Q68D91 Metallo-beta-lactamase domain-containing protein 2 OS=Homo sapiens GN=MBLAC2 PE=2 SV=3 - [MBLAC2\_HUMAN]  
Q96124 Far upstream element-binding protein 3 OS=Homo sapiens GN=FUBP3 PE=1 SV=2 - [FUBP3\_HUMAN]  
060341 Lysine-specific histone demethylase 1A OS=Homo sapiens GN=KDM1A PE=1 SV=2 - [KDM1A\_HUMAN]  
P11234 Ras-related protein Ral-B OS=Homo sapiens GN=RALB PE=1 SV=1 - [RALB\_HUMAN]  
Q9UID3 Vacuolar protein sorting-associated protein 51 homolog OS=Homo sapiens GN=VPS51 PE=1 SV=2 - [VPS51\_HUMAN]  
000505 Importin subunit alpha-4 OS=Homo sapiens GN=KPN3 PE=1 SV=2 - [IMA4\_HUMAN]  
P13612 Integrin alpha-4 OS=Homo sapiens GN=ITGA4 PE=1 SV=3 - [ITA4\_HUMAN]  
P62906 60S ribosomal protein L10a OS=Homo sapiens GN=RPL10A PE=1 SV=2 - [RL10A\_HUMAN]  
Q9NPD3 Exosome complex component RRP41 OS=Homo sapiens GN=EXOSC4 PE=1 SV=3 - [EXOS4\_HUMAN]  
Q15717 ELAV-like protein 1 OS=Homo sapiens GN=ELAVL1 PE=1 SV=2 - [ELAV1\_HUMAN]  
Q9H267 Vacuolar protein sorting-associated protein 33B OS=Homo sapiens GN=VPS33B PE=1 SV=2 - [VP33B\_HUMAN]  
Q8TBC4 NEDD8-activating enzyme E1 catalytic subunit OS=Homo sapiens GN=UBA3 PE=1 SV=2 - [UBA3\_HUMAN]  
P52732 Kinesin-like protein KIF11 OS=Homo sapiens GN=KIF11 PE=1 SV=2 - [KIF11\_HUMAN]  
Q8NCW5 NAD(P)H-hydrate epimerase OS=Homo sapiens GN=APOA1BP PE=1 SV=2 - [NNRE\_HUMAN]  
P19338 Nucleolin OS=Homo sapiens GN=NCL PE=1 SV=3 - [NUCL\_HUMAN]  
060911 Cathepsin L2 OS=Homo sapiens GN=CTSL PE=1 SV=2 - [CATL2\_HUMAN]  
Q9NUQ3 Gamma-taxilin OS=Homo sapiens GN=TXLNG PE=1 SV=2 - [TXLNG\_HUMAN]  
075694 Nuclear pore complex protein Nup155 OS=Homo sapiens GN=NUP155 PE=1 SV=1 - [NUP155\_HUMAN]  
P60033 CD81 antigen OS=Homo sapiens GN=CD81 PE=1 SV=1 - [CD81\_HUMAN]  
Q6IVV6 DBH-like monoxygenase protein 1 OS=Homo sapiens GN=MOXD1 PE=1 SV=1 - [MOXD1\_HUMAN]  
Q86VR8 Four-jointed box protein 1 OS=Homo sapiens GN=FJX1 PE=2 SV=1 - [FJX1\_HUMAN]  
Q8WUM0 Nuclear pore complex protein Nup133 OS=Homo sapiens GN=NUP133 PE=1 SV=2 - [NUP133\_HUMAN]  
Q9NR56 Muscblind-like protein 1 OS=Homo sapiens GN=MBNL1 PE=1 SV=2 - [MBNL1\_HUMAN]  
P98172 Ephrin-B1 OS=Homo sapiens GN=EFNB1 PE=1 SV=1 - [EFNB1\_HUMAN]  
Q99575 Ribonucleases P/MRP protein subunit POP1 OS=Homo sapiens GN=POP1 PE=1 SV=2 - [POP1\_HUMAN]  
Q06124 Tyrosine-protein phosphatase non-receptor type 11 OS=Homo sapiens GN=PTPN11 PE=1 SV=2 - [PTN11\_HUMAN]  
Q15046 Lysine-tRNA ligase OS=Homo sapiens GN=KARS PE=1 SV=3 - [SYK\_HUMAN]  
043913 Origin recognition complex subunit 5 OS=Homo sapiens GN=ORC5 PE=1 SV=1 - [ORC5\_HUMAN]  
Q9UP83 Conserved oligomeric Golgi complex subunit 5 OS=Homo sapiens GN=COG5 PE=1 SV=3 - [COG5\_HUMAN]  
P34931 Heat shock 70 kDa protein 1-like OS=Homo sapiens GN=HSPA1L PE=1 SV=2 - [HS71L\_HUMAN]  
Q7Z4G1 COMM domain-containing protein 6 OS=Homo sapiens GN=COMM6 PE=1 SV=1 - [COMM6\_HUMAN]  
P86790 Vacuolar fusion protein CCZ1 homolog B OS=Homo sapiens GN=CCZ1B PE=1 SV=1 - [CCZ1B\_HUMAN]  
Q8TEX9 Importin-4 OS=Homo sapiens GN=IPO4 PE=1 SV=2 - [IPO4\_HUMAN]  
P49419 Alpha-aminoacidic semialdehyde dehydrogenase OS=Homo sapiens GN=ALDH7A1 PE=1 SV=5 - [AL7A1\_HUMAN]  
Q86X29 Lipolysis-stimulated lipoprotein receptor OS=Homo sapiens GN=LSR PE=1 SV=4 - [LSR\_HUMAN]  
Q9UJ70 N-acetyl-D-glucosamine kinase OS=Homo sapiens GN=NAGK PE=1 SV=4 - [NAGK\_HUMAN]  
Q96AX1 Vacuolar protein sorting-associated protein 33A OS=Homo sapiens GN=VPS33A PE=1 SV=1 - [VP33A\_HUMAN]  
075718 Cartilage-associated protein OS=Homo sapiens GN=CRTPA PE=1 SV=1 - [CRTPA\_HUMAN]  
Q96EK5 KIF1-binding protein OS=Homo sapiens GN=KIAA1279 PE=1 SV=1 - [KBP\_HUMAN]  
043598 2'-deoxynucleoside 5'-phosphate N-hydrolase 1 OS=Homo sapiens GN=DNPH1 PE=1 SV=1 - [DNPH1\_HUMAN]  
Q658Y4 Protein FAM91A1 OS=Homo sapiens GN=FAM91A1 PE=1 SV=3 - [F91A1\_HUMAN]  
Q8N3F8 MICAL-like protein 1 OS=Homo sapiens GN=MICAL1 PE=1 SV=2 - [M1LK1\_HUMAN]  
Q96176 MMS19 nucleotide excision repair protein homolog OS=Homo sapiens GN=MMS19 PE=1 SV=2 - [MMS19\_HUMAN]  
P54578 Ubiquitin carboxyl-terminal hydrolase 14 OS=Homo sapiens GN=USP14 PE=1 SV=3 - [UBP14\_HUMAN]  
Q14980 Nuclear mitotic apparatus protein 1 OS=Homo sapiens GN=NUMA1 PE=1 SV=2 - [NUMA1\_HUMAN]  
Q9H000 Probable E3 ubiquitin-protein ligase makorin-2 OS=Homo sapiens GN=MKRN2 PE=1 SV=2 - [MKRN2\_HUMAN]  
Q15293 Reticulocalbin-1 OS=Homo sapiens GN=RCN1 PE=1 SV=1 - [RCN1\_HUMAN]  
Q68E01 Integrator complex subunit 3 OS=Homo sapiens GN=INTS3 PE=1 SV=1 - [INT3\_HUMAN]  
Q9H204 Mediator of RNA polymerase II transcription subunit 28 OS=Homo sapiens GN=MED28 PE=1 SV=1 - [MED28\_HUMAN]  
Q61BS0 Twinfilin-2 OS=Homo sapiens GN=TFW2 PE=1 SV=2 - [TFW2\_HUMAN]  
P31946 14-3-3 protein beta/alpha OS=Homo sapiens GN=YWHAB PE=1 SV=3 - [1433B\_HUMAN]  
Q6PD62 RNA polymerase-associated protein CTR9 homolog OS=Homo sapiens GN=CTR9 PE=1 SV=1 - [CTR9\_HUMAN]  
Q8WV41 Sorting nexin-33 OS=Homo sapiens GN=SNX33 PE=1 SV=1 - [SNX33\_HUMAN]  
Q99613 Eukaryotic translation initiation factor 3 subunit C OS=Homo sapiens GN=EIF3C PE=1 SV=1 - [EIF3C\_HUMAN]  
P54819 Adenylate kinase 2, mitochondrial OS=Homo sapiens GN=AK2 PE=1 SV=2 - [KAD2\_HUMAN]  
Q00341 Vigilin OS=Homo sapiens GN=HDLBP PE=1 SV=2 - [VIGLN\_HUMAN]  
Q00839 Heterogeneous nuclear ribonucleoprotein U OS=Homo sapiens GN=HNRPU PE=1 SV=6 - [HNRPU\_HUMAN]  
Q02818 Nucleobindin-1 OS=Homo sapiens GN=NUCB1 PE=1 SV=4 - [NUCB1\_HUMAN]  
Q81X18 Probable ATP-dependent RNA helicase DHX40 OS=Homo sapiens GN=DHX40 PE=1 SV=2 - [DHX40\_HUMAN]  
Q43505 Beta-1,4-glucuronyltransferase 1 OS=Homo sapiens GN=B4GAT1 PE=1 SV=1 - [B4GA1\_HUMAN]  
Q16513 Serine/threonine-protein kinase N2 OS=Homo sapiens GN=PKN2 PE=1 SV=1 - [PKN2\_HUMAN]  
043897 Tollid-like protein 1 OS=Homo sapiens GN=TLL1 PE=1 SV=1 - [TLL1\_HUMAN]  
P61981 14-3-3 protein gamma OS=Homo sapiens GN=YWHAG PE=1 SV=2 - [1433G\_HUMAN]  
Q13243 Serine/arginine-rich splicing factor 5 OS=Homo sapiens GN=SRSF5 PE=1 SV=1 - [SRSF5\_HUMAN]  
Q96FN4 Copine-2 OS=Homo sapiens GN=CPNE2 PE=1 SV=3 - [CPNE2\_HUMAN]  
Q9UK76 Hematological and neurological expressed 1 protein OS=Homo sapiens GN=HNI PE=1 SV=3 - [HNI\_HUMAN]  
Q8NFW8 N-acyleuraminatase cytidylyltransferase OS=Homo sapiens GN=CMAS PE=1 SV=2 - [NEUA\_HUMAN]  
Q9UBL3 Set1/Ash2 histone methyltransferase complex subunit ASH2 OS=Homo sapiens GN=ASH2L PE=1 SV=1 - [ASH2L\_HUMAN]  
P40222 Alpha-taxilin OS=Homo sapiens GN=TXLNA PE=1 SV=3 - [TXLNA\_HUMAN]  
P40925 Malate dehydrogenase, cytoplasmic OS=Homo sapiens GN=MDH1 PE=1 SV=4 - [MDHC\_HUMAN]  
Q6NS14 Uncharacterized protein CXorf57 OS=Homo sapiens GN=CXorf57 PE=1 SV=2 - [CX057\_HUMAN]  
P14923 Junction plakoglobin OS=Homo sapiens GN=JUP PE=1 SV=3 - [PLAK\_HUMAN]  
P47813 Eukaryotic translation initiation factor 1A, X-chromosomal OS=Homo sapiens GN=EIF1AX PE=1 SV=2 - [IF1AX\_HUMAN]  
Q9BRX5 DNA replication complex GINS protein PSF3 OS=Homo sapiens GN=GINS3 PE=1 SV=1 - [PSF3\_HUMAN]  
Q9NXV2 BTB/POZ domain-containing protein KCTD5 OS=Homo sapiens GN=KCTD5 PE=1 SV=1 - [KCTD5\_HUMAN]  
Q57447 E3 ubiquitin-protein ligase HECTD3 OS=Homo sapiens GN=HECTD3 PE=1 SV=1 - [HECD3\_HUMAN]  
Q9Y5X3 Sorting nexin-5 OS=Homo sapiens GN=SNX5 PE=1 SV=1 - [SNX5\_HUMAN]  
Q9P287 BRCA2 and CDKN1A-interacting protein OS=Homo sapiens GN=BCCIP PE=1 SV=1 - [BCCIP\_HUMAN]  
Q9POM6 Core histone macro-H2A.2 OS=Homo sapiens GN=H2AFY2 PE=1 SV=3 - [H2AW\_HUMAN]  
Q8N4P2 Tetrapeptide repeat protein 30B OS=Homo sapiens GN=TT30B PE=1 SV=2 - [TT30B\_HUMAN]  
P14221 Protein Wnt-5a OS=Homo sapiens GN=WNT5A PE=1 SV=2 - [WNT5A\_HUMAN]  
060306 Intron-binding protein aquarius OS=Homo sapiens GN=AQR PE=1 SV=4 - [AQR\_HUMAN]  
Q9Y4B6 Protein VPRBP OS=Homo sapiens GN=VPRBP PE=1 SV=3 - [VPRBP\_HUMAN]  
P31153 S-adenosylmethionine synthase isoform type-2 OS=Homo sapiens GN=MAT2A PE=1 SV=1 - [METR2\_HUMAN]  
P52789 Hexokinase-2 OS=Homo sapiens GN=HK2 PE=1 SV=2 - [HKX2\_HUMAN]  
Q9Y4C2 TRPM8 channel-associated factor 1 OS=Homo sapiens GN=TCAF1 PE=1 SV=3 - [TCAF1\_HUMAN]  
015020 Spectrin beta chain, non-erythrocytic 2 OS=Homo sapiens GN=SPTBN2 PE=1 SV=3 - [SPTN2\_HUMAN]  
Q96DM3 Uncharacterized protein C18orf8 OS=Homo sapiens GN=C18orf8 PE=2 SV=2 - [MIC1\_HUMAN]  
Q9H6T3 RNA polymerase II-associated protein 3 OS=Homo sapiens GN=RPAP3 PE=1 SV=2 - [RPAP3\_HUMAN]  
P54619 5'-AMP-activated protein kinase subunit gamma-1 OS=Homo sapiens GN=PRKAG1 PE=1 SV=1 - [AAKG1\_HUMAN]  
Q8NBJ5 Procollagen galactosyltransferase 1 OS=Homo sapiens GN=COLGALT1 PE=1 SV=1 - [GT251\_HUMAN]  
P12270 Nucleoprotein TPR OS=Homo sapiens GN=TPR PE=1 SV=3 - [TPR\_HUMAN]  
P55268 Laminin subunit beta-2 OS=Homo sapiens GN=LAMB2 PE=1 SV=2 - [LAMB2\_HUMAN]  
Q81WA0 WD repeat-containing protein 75 OS=Homo sapiens GN=WDR75 PE=1 SV=1 - [WDR75\_HUMAN]  
Q9BVG4 Protein PBDC1 OS=Homo sapiens GN=PBDC1 PE=1 SV=1 - [PBDC1\_HUMAN]  
Q96F07 Cytoplasmic FMR1-interacting protein 2 OS=Homo sapiens GN=CYFIP2 PE=1 SV=2 - [CYFIP2\_HUMAN]  
Q5JXB2 Putative ubiquitin-conjugating enzyme E2 N-like OS=Homo sapiens GN=UBE2NL PE=1 SV=1 - [UE2NL\_HUMAN]  
Q7Z3J2 UPP0505 protein C16orf62 OS=Homo sapiens GN=C16orf62 PE=1 SV=2 - [CP062\_HUMAN]

Q9NVU0 DNA-directed RNA polymerase III subunit RPC5 OS=Homo sapiens GN=POLR3E PE=1 SV=1 - [RPC5\_HUMAN]  
Q9P289 Serine/threonine-protein kinase 26 OS=Homo sapiens GN=STRK26 PE=1 SV=2 - [STRK26\_HUMAN]  
014657 Torsin-1B OS=Homo sapiens GN=TOR1B PE=1 SV=2 - [TOR1B\_HUMAN]  
Q86X55 Histone-arginine methyltransferase CARM1 OS=Homo sapiens GN=CARM1 PE=1 SV=3 - [CARM1\_HUMAN]  
Q14247 Src substrate cortactin OS=Homo sapiens GN=CTTN PE=1 SV=2 - [SRC8\_HUMAN]  
Q9P1U1 Actin-related protein 3B OS=Homo sapiens GN=ACTR3B PE=2 SV=1 - [ARP3B\_HUMAN]  
Q9UQN3 Charged multivesicular body protein 2b OS=Homo sapiens GN=CHMP2B PE=1 SV=1 - [CHM2B\_HUMAN]  
P23610 Factor VIII intron 22 protein OS=Homo sapiens GN=F8A1 PE=1 SV=2 - [F8T2\_HUMAN]  
P07237 Protein disulfide-isomerase OS=Homo sapiens GN=PAHB PE=1 SV=3 - [PD1A1\_HUMAN]  
Q9NQR4 Omega-amidase NIT2 OS=Homo sapiens GN=NIT2 PE=1 SV=1 - [NIT2\_HUMAN]  
Q9UHD8 Septin-9 OS=Homo sapiens GN=SEPT9 PE=1 SV=2 - [SEPT9\_HUMAN]  
Q61BW4 Condensin-2 complex subunit H2 OS=Homo sapiens GN=NCAPH2 PE=1 SV=1 - [CNDH2\_HUMAN]  
P09543 2',3'-cyclic-nucleotide 3'-phosphodiesterase OS=Homo sapiens GN=CNP PE=1 SV=2 - [CN37\_HUMAN]  
P14678 Small nuclear ribonucleoprotein-associated proteins B and B' OS=Homo sapiens GN=SNRBP PE=1 SV=2 - [RSMB\_HUMAN]  
P15153 Ras-related C3 botulinum toxin substrate 2 OS=Homo sapiens GN=RAC2 PE=1 SV=1 - [RAC2\_HUMAN]  
P49005 DNA polymerase delta subunit 2 OS=Homo sapiens GN=POLD2 PE=1 SV=1 - [DPOD2\_HUMAN]  
Q5VST6 Alpha/beta hydrolase domain-containing protein 17B OS=Homo sapiens GN=ABHD17B PE=2 SV=1 - [AB17B\_HUMAN]  
Q96CX2 BTB/POZ domain-containing protein KCTD12 OS=Homo sapiens GN=KCTD12 PE=1 SV=1 - [KCD12\_HUMAN]  
P29122 Proprotein convertase subtilisin/kexin type 6 OS=Homo sapiens GN=PCSK6 PE=1 SV=1 - [PCSK6\_HUMAN]  
Q92820 Gamma-glutamyl hydrolase OS=Homo sapiens GN=GGH PE=1 SV=2 - [GGH\_HUMAN]  
Q8TAE8 Growth arrest and DNA damage-inducible proteins-interacting protein 1 OS=Homo sapiens GN=GADD45GIP1 PE=1 SV=1 - [G451P\_HUMAN]  
P35249 Replication factor C subunit 4 OS=Homo sapiens GN=RFC4 PE=1 SV=2 - [RFC4\_HUMAN]  
Q70JAJ Chondroitin sulfate synthase 3 OS=Homo sapiens GN=CHSY3 PE=2 SV=3 - [CHSS3\_HUMAN]  
Q9BZE4 Nucleolar GTP-binding protein 1 OS=Homo sapiens GN=GTPBP4 PE=1 SV=3 - [NOG1\_HUMAN]  
Q14118 Dystroglycan OS=Homo sapiens GN=DAG1 PE=1 SV=2 - [DAG1\_HUMAN]  
Q14997 Proteasome activator complex subunit 4 OS=Homo sapiens GN=PSME4 PE=1 SV=2 - [PSME4\_HUMAN]  
P55786 Puromycin-sensitive aminopeptidase OS=Homo sapiens GN=NPEPPS PE=1 SV=2 - [PSA\_HUMAN]  
Q13619 Cullin-4A OS=Homo sapiens GN=CUL4A PE=1 SV=3 - [CUL4A\_HUMAN]  
P0DMP2 SLIT-ROBO Rho GTPase-activating protein 2B OS=Homo sapiens GN=SRGAP2B PE=3 SV=1 - [SRG2B\_HUMAN]  
P78347 General transcription factor II-1 OS=Homo sapiens GN=GTTF2I PE=1 SV=2 - [GTF2I\_HUMAN]  
Q9UGJ1 Gamma-tubulin complex component 4 OS=Homo sapiens GN=TUBGC4 PE=1 SV=1 - [GCP4\_HUMAN]  
P16035 Metalloproteinase inhibitor 2 OS=Homo sapiens GN=TIMP2 PE=1 SV=2 - [TIMP2\_HUMAN]  
Q9UHI6 Probable ATP-dependent RNA helicase DDX20 OS=Homo sapiens GN=DDX20 PE=1 SV=2 - [DDX20\_HUMAN]  
P50897 Palmitoyl-protein thioesterase 1 OS=Homo sapiens GN=PPT1 PE=1 SV=1 - [PPT1\_HUMAN]  
Q9IHM1 Kinetochore protein Spc25 OS=Homo sapiens GN=SPC25 PE=1 SV=1 - [SPC25\_HUMAN]  
Q6UWP8 Suprabasin OS=Homo sapiens GN=SBSN PE=1 SV=2 - [SBSN\_HUMAN]  
P00505 Aspartate aminotransferase, mitochondrial OS=Homo sapiens GN=GOT2 PE=1 SV=3 - [AATM\_HUMAN]  
Q99435 Protein kinase C-binding protein NELL2 OS=Homo sapiens GN=NELL2 PE=1 SV=1 - [NELL2\_HUMAN]  
Q9NR30 Nucleolar RNA helicase 2 OS=Homo sapiens GN=DDX21 PE=1 SV=5 - [DDX21\_HUMAN]  
Q75717 WD repeat and HMG-box DNA-binding protein 1 OS=Homo sapiens GN=WDHD1 PE=1 SV=1 - [WDHD1\_HUMAN]  
Q9NVE7 Pantothenate kinase 4 OS=Homo sapiens GN=PANK4 PE=1 SV=1 - [PANK4\_HUMAN]  
Q8NOV4 Leucine-rich repeat LGI family member 2 OS=Homo sapiens GN=LGI2 PE=2 SV=1 - [LGI2\_HUMAN]  
Q9H336 Cysteine-rich secretory protein LCCL domain-containing 1 OS=Homo sapiens GN=CRISPLD1 PE=2 SV=1 - [CRLD1\_HUMAN]  
Q9UNP9 Peptidyl-prolyl cis-trans isomerase E OS=Homo sapiens GN=PP1E PE=1 SV=1 - [PP1E\_HUMAN]  
P30048 Thiorodoxin-dependent peroxide reductase, mitochondrial OS=Homo sapiens GN=PRDX3 PE=1 SV=3 - [PRDX3\_HUMAN]  
Q6NVC1 Bifunctional arginine demethylase and lysyl-hydroxylase JMJD6 OS=Homo sapiens GN=JMJD6 PE=1 SV=1 - [JMJD6\_HUMAN]  
P61077 Ubiquitin-conjugating enzyme E2 D3 OS=Homo sapiens GN=UBE2D3 PE=1 SV=1 - [UB2D3\_HUMAN]  
P42166 Lamina-associated polypeptide 2, isoform alpha OS=Homo sapiens GN=TMPO PE=1 SV=2 - [LAP2A\_HUMAN]  
P67870 Casein kinase II subunit beta OS=Homo sapiens GN=CSNK2B PE=1 SV=1 - [CSK2B\_HUMAN]  
P52435 DNA-directed RNA polymerase II subunit RPB11-a OS=Homo sapiens GN=POLR2J PE=1 SV=1 - [RPB11\_HUMAN]  
Q12824 SWI/SNF-related matrix-associated actin-dependent regulator of chromatin subfamily B member 1 OS=Homo sapiens GN=SMARCB1 PE=1 SV=2 - [SNF5\_HUMAN]  
Q9UJX4 Anaphase-promoting complex subunit 5 OS=Homo sapiens GN=ANAPC5 PE=1 SV=2 - [APC5\_HUMAN]  
Q8TED0 U3 small nucleolar RNA-associated protein 15 homolog OS=Homo sapiens GN=UTP15 PE=1 SV=3 - [UTP15\_HUMAN]  
Q96B26 Exosome complex component RRP43 OS=Homo sapiens GN=EXOSC8 PE=1 SV=1 - [EXOSC8\_HUMAN]  
P14649 Myosin light chain 6B OS=Homo sapiens GN=MYL6B PE=1 SV=1 - [MYL6B\_HUMAN]  
Q9H6S0 Probable ATP-dependent RNA helicase YTHDC2 OS=Homo sapiens GN=YTHDC2 PE=1 SV=2 - [YTHDC2\_HUMAN]  
P17900 Ganglioside GM2 activator OS=Homo sapiens GN=GM2A PE=1 SV=4 - [SAP3\_HUMAN]  
P30419 Glycylpeptide N-tetradecanoyltransferase 1 OS=Homo sapiens GN=NMT1 PE=1 SV=2 - [NMT1\_HUMAN]  
Q96AE4 Far upstream element-binding protein 1 OS=Homo sapiens GN=FUBP1 PE=1 SV=3 - [FUBP1\_HUMAN]  
P01876 Ig alpha-1 chain C region OS=Homo sapiens GN=IGHA1 PE=1 SV=2 - [IGHA1\_HUMAN]  
000410 Importin-5 OS=Homo sapiens GN=IPO5 PE=1 SV=4 - [IPO5\_HUMAN]  
P29317 Ephrin type-A receptor 2 OS=Homo sapiens GN=EPHA2 PE=1 SV=2 - [EPHA2\_HUMAN]  
ASMDW9 Putative small nuclear ribonucleoprotein G-like protein 15 OS=Homo sapiens GN=SNRPGP15 PE=5 SV=2 - [RUXGL\_HUMAN]  
P62495 Eukaryotic peptide chain release factor subunit 1 OS=Homo sapiens GN=ETF1 PE=1 SV=3 - [ERF1\_HUMAN]  
Q9BYB4 Guanine nucleotide-binding protein subunit beta-like protein 1 OS=Homo sapiens GN=GNB1L PE=1 SV=2 - [GNB1L\_HUMAN]  
P56545 C-terminal-binding protein 2 OS=Homo sapiens GN=CTBP2 PE=1 SV=1 - [CTBP2\_HUMAN]  
Q5VSL9 Striatin-interacting protein 1 OS=Homo sapiens GN=STRIP1 PE=1 SV=1 - [STRIP1\_HUMAN]  
Q07564 Golgin subfamily A member 7 OS=Homo sapiens GN=GOLGA7 PE=1 SV=2 - [GOGA7\_HUMAN]  
000762 Ubiquitin-conjugating enzyme E2 C OS=Homo sapiens GN=UBE2C PE=1 SV=1 - [UBE2C\_HUMAN]  
P42677 40S ribosomal protein S27 OS=Homo sapiens GN=RPS27 PE=1 SV=3 - [RS27\_HUMAN]  
P45880 Voltage-dependent anion-selective channel protein 2 OS=Homo sapiens GN=VDAC2 PE=1 SV=2 - [VDAC2\_HUMAN]  
Q43488 Aflatoxin B1 aldehyde reductase member 2 OS=Homo sapiens GN=AKR7A2 PE=1 SV=3 - [AKR72\_HUMAN]  
Q96RW7 Hemicentin-1 OS=Homo sapiens GN=HMCN1 PE=1 SV=2 - [HMCN1\_HUMAN]  
Q9BVQ7 Spermatogenesis-associated protein 5-like protein 1 OS=Homo sapiens GN=SPATA5L1 PE=1 SV=2 - [SPA5L\_HUMAN]  
P17655 Calpain-2 catalytic subunit OS=Homo sapiens GN=CAPN2 PE=1 SV=6 - [CAN2\_HUMAN]  
Q6VN20 Ran-binding protein 10 OS=Homo sapiens GN=RANBP10 PE=1 SV=1 - [RBP10\_HUMAN]  
Q96CS7 Pleckstrin homology domain-containing family B member 2 OS=Homo sapiens GN=PLEKHB2 PE=1 SV=1 - [PKHB2\_HUMAN]  
Q96MM7 Heparan-sulfate 6-O-sulfotransferase 2 OS=Homo sapiens GN=HS6ST2 PE=2 SV=2 - [H6ST2\_HUMAN]  
075937 DnaJ homolog subfamily C member 8 OS=Homo sapiens GN=DNAJC8 PE=1 SV=2 - [DNJC8\_HUMAN]  
094923 D-glucuronyl C5-epimerase OS=Homo sapiens GN=GLCE PE=1 SV=3 - [GLCE\_HUMAN]  
P51114 Fragile X mental retardation syndrome-related protein 1 OS=Homo sapiens GN=FXR1 PE=1 SV=3 - [FXR1\_HUMAN]  
Q14181 DNA polymerase alpha subunit B OS=Homo sapiens GN=POLA2 PE=1 SV=2 - [DPOA2\_HUMAN]  
P60866 40S ribosomal protein S20 OS=Homo sapiens GN=RPS20 PE=1 SV=1 - [RS20\_HUMAN]  
Q8NCM8 Cytoplasmic dynein 2 heavy chain 1 OS=Homo sapiens GN=DYNC2H1 PE=1 SV=4 - [DYHC2\_HUMAN]  
Q9NS86 LanC-like protein 2 OS=Homo sapiens GN=LANCL2 PE=1 SV=1 - [LANC2\_HUMAN]  
Q9Y3A5 Ribosome maturation protein SBDS OS=Homo sapiens GN=SBDS PE=1 SV=4 - [SBDS\_HUMAN]  
Q96A65 Excyst complex component 4 OS=Homo sapiens GN=EXOC4 PE=1 SV=1 - [EXOC4\_HUMAN]  
Q99459 Cell division cycle 5-like protein OS=Homo sapiens GN=CDC5L PE=1 SV=2 - [CDC5L\_HUMAN]  
P09382 Galectin-1 OS=Homo sapiens GN=LGALS1 PE=1 SV=2 - [LEG1\_HUMAN]  
Q12860 Contactin-1 OS=Homo sapiens GN=CNTN1 PE=1 SV=1 - [CNTN1\_HUMAN]  
Q9NYU2 UDP-glucose:glycoprotein glucosyltransferase 1 OS=Homo sapiens GN=UGGT1 PE=1 SV=3 - [UGGG1\_HUMAN]  
Q60282 Kinesin heavy chain isoform 5C OS=Homo sapiens GN=KIF5C PE=1 SV=1 - [KIF5C\_HUMAN]  
Q07954 Prolow-density lipoprotein receptor-related protein 1 OS=Homo sapiens GN=LRP1 PE=1 SV=2 - [LRP1\_HUMAN]  
Q60832 H/ACA ribonucleoprotein complex subunit 4 OS=Homo sapiens GN=DKC1 PE=1 SV=3 - [DKC1\_HUMAN]  
Q86WT1 Tetrapeptide repeat protein 30A OS=Homo sapiens GN=TT30A PE=2 SV=3 - [TT30A\_HUMAN]  
P54289 Voltage-dependent calcium channel subunit alpha-2/delta-1 OS=Homo sapiens GN=CACNA2D1 PE=1 SV=3 - [CAZD1\_HUMAN]  
Q9H871 Protein RMD5 homolog A OS=Homo sapiens GN=RMND5A PE=1 SV=1 - [RMD5A\_HUMAN]  
Q95825 Quinone oxidoreductase-like protein 1 OS=Homo sapiens GN=CRYZL1 PE=1 SV=2 - [QORL1\_HUMAN]  
Q8WXX5 DnaJ homolog subfamily C member 9 OS=Homo sapiens GN=DNAJC9 PE=1 SV=1 - [DNJC9\_HUMAN]  
Q9BRP4 Proteasomal ATPase-associated factor 1 OS=Homo sapiens GN=PAAF1 PE=1 SV=2 - [PAAF1\_HUMAN]  
Q9HD40 O-phosphoseryl-tRNA(Sec) selenium transferase OS=Homo sapiens GN=SEPSSECS PE=1 SV=2 - [SPCS\_HUMAN]  
P31150 Rab GDP dissociation inhibitor alpha OS=Homo sapiens GN=GD11 PE=1 SV=2 - [GDI1\_HUMAN]  
P49959 Double-strand break repair protein MRE11A OS=Homo sapiens GN=MRE11A PE=1 SV=3 - [MRE11\_HUMAN]  
Q86VM7 Homer protein homolog 1 OS=Homo sapiens GN=HOMER1 PE=1 SV=2 - [HOMER1\_HUMAN]  
Q13642 Four and a half LIM domains protein 1 OS=Homo sapiens GN=FHL1 PE=1 SV=4 - [FHL1\_HUMAN]  
Q9Y547 Intraflagellar transport protein 25 homolog OS=Homo sapiens GN=HSPB11 PE=1 SV=1 - [IFT25\_HUMAN]  
Q75581 Low-density lipoprotein receptor-related protein 6 OS=Homo sapiens GN=LRP6 PE=1 SV=2 - [LRP6\_HUMAN]  
Q99653 Calcineurin B homologous protein 1 OS=Homo sapiens GN=CHP1 PE=1 SV=3 - [CHP1\_HUMAN]  
Q9UJX5 Anaphase-promoting complex subunit 4 OS=Homo sapiens GN=ANAPC4 PE=1 SV=2 - [APC4\_HUMAN]  
P00491 Purine nucleoside phosphorylase OS=Homo sapiens GN=PNP PE=1 SV=2 - [PNPH\_HUMAN]  
Q7L1V2 Vacuolar fusion protein MON1 homolog B OS=Homo sapiens GN=MON1B PE=1 SV=1 - [MON1B\_HUMAN]  
Q13765 Nascent polypeptide-associated complex subunit alpha OS=Homo sapiens GN=NACA PE=1 SV=1 - [NACA\_HUMAN]  
Q6PGP7 Tetrapeptide repeat protein 37 OS=Homo sapiens GN=TT37 PE=1 SV=1 - [TT37\_HUMAN]  
Q9HD06 5'-3' exoribonuclease 2 OS=Homo sapiens GN=XRN2 PE=1 SV=1 - [XRN2\_HUMAN]  
Q9H0W8 Protein SMG9 OS=Homo sapiens GN=SMG9 PE=1 SV=1 - [SMG9\_HUMAN]

A6NHR9 Structural maintenance of chromosomes flexible hinge domain-containing protein 1 OS=Homo sapiens GN=SMCHD1 PE=1 SV=2 - [SMHD1\_HUMAN]  
 Q96KP1 Exocyst complex component 2 OS=Homo sapiens GN=EXOC2 PE=1 SV=1 - [EXOC2\_HUMAN]  
 P56134 ATP synthase subunit f, mitochondrial OS=Homo sapiens GN=ATP5F2 PE=1 SV=3 - [ATPK\_HUMAN]  
 P69849 Nodal modulator 3 OS=Homo sapiens GN=NOMO3 PE=3 SV=2 - [NOMO3\_HUMAN]  
 Q16204 Coiled-coil domain-containing protein 6 OS=Homo sapiens GN=CCDC6 PE=1 SV=2 - [CCDC6\_HUMAN]  
 Q8NB90 Spermatogenesis-associated protein 5 OS=Homo sapiens GN=SPATA5 PE=1 SV=3 - [SPAT5\_HUMAN]  
 P62841 40S ribosomal protein S15 OS=Homo sapiens GN=RPS15 PE=1 SV=2 - [RS15\_HUMAN]  
 Q92922 SWI/SNF complex subunit SMARCC1 OS=Homo sapiens GN=SMARCC1 PE=1 SV=3 - [SMRCC1\_HUMAN]  
 Q08378 Golgin subfamily A member 3 OS=Homo sapiens GN=GOLGA3 PE=1 SV=2 - [GOGA3\_HUMAN]  
 P78537 Biogenesis of lysosome-related organelles complex 1 subunit 1 OS=Homo sapiens GN=BLOC1S1 PE=1 SV=2 - [BL1S1\_HUMAN]  
 P11441 Ubiquitin-like protein 4A OS=Homo sapiens GN=UBL4A PE=1 SV=1 - [UBL4A\_HUMAN]  
 P10155 60 kDa SS-A/Ro ribonucleoprotein OS=Homo sapiens GN=TROVE2 PE=1 SV=2 - [RO60\_HUMAN]  
 P42345 Serine/threonine-protein kinase mTOR OS=Homo sapiens GN=MTOR PE=1 SV=1 - [MTOR\_HUMAN]  
 Q9COC9 E2/E3 hybrid ubiquitin-protein ligase UBE2O OS=Homo sapiens GN=UBE2O PE=1 SV=3 - [UBE2O\_HUMAN]  
 Q94874 E3 UFM1-protein ligase 1 OS=Homo sapiens GN=UFL1 PE=1 SV=2 - [UFL1\_HUMAN]  
 O15294 UDP-N-acetylglucosamine-peptide N-acetylglucosaminyltransferase 110 kDa subunit OS=Homo sapiens GN=OGT PE=1 SV=3 - [OGT1\_HUMAN]  
 Q96JG6 Coiled-coil domain-containing protein 132 OS=Homo sapiens GN=CCDC132 PE=1 SV=3 - [CC132\_HUMAN]  
 Q6PD74 Alpha- and gamma-adaptin-binding protein p34 OS=Homo sapiens GN=AAGAB PE=1 SV=1 - [AAGAB\_HUMAN]  
 P61812 Transforming growth factor beta-2 OS=Homo sapiens GN=TGFB2 PE=1 SV=1 - [TGFB2\_HUMAN]  
 Q14160 Protein scribble homolog OS=Homo sapiens GN=SCRIB PE=1 SV=4 - [SCRIB\_HUMAN]  
 P49767 Vascular endothelial growth factor C OS=Homo sapiens GN=VEGFC PE=1 SV=1 - [VEGFC\_HUMAN]  
 P57737 Coronin-7 OS=Homo sapiens GN=CORO7 PE=1 SV=2 - [CORO7\_HUMAN]  
 Q13620 Cullin-4B OS=Homo sapiens GN=CUL4B PE=1 SV=4 - [CUL4B\_HUMAN]  
 Q9GZL7 Ribosome biogenesis protein WDR12 OS=Homo sapiens GN=WDR12 PE=1 SV=2 - [WDR12\_HUMAN]  
 P11216 Glycogen phosphorylase, brain form OS=Homo sapiens GN=PYGB PE=1 SV=5 - [PYGB\_HUMAN]  
 P49589 Cysteine-tRNA ligase, cytoplasmic OS=Homo sapiens GN=CARS PE=1 SV=3 - [SYCC\_HUMAN]  
 P06858 Lipoprotein lipase OS=Homo sapiens GN=LPL PE=1 SV=1 - [LPL\_HUMAN]  
 Q9UL26 Ras-related protein Rab-22A OS=Homo sapiens GN=RAB22A PE=1 SV=2 - [RB22A\_HUMAN]  
 Q2NL82 Pre-rRNA-processing protein TSR1 homolog OS=Homo sapiens GN=TSR1 PE=1 SV=1 - [TSR1\_HUMAN]  
 P20042 Eukaryotic translation initiation factor 2 subunit 2 OS=Homo sapiens GN=EIF2S2 PE=1 SV=2 - [IF2B\_HUMAN]  
 P28161 Glutathione S-transferase Mu 2 OS=Homo sapiens GN=GSTM2 PE=1 SV=2 - [GSTM2\_HUMAN]  
 P49411 Elongation factor Tu, mitochondrial OS=Homo sapiens GN=TUFM PE=1 SV=2 - [EFTU\_HUMAN]  
 P42766 60S ribosomal protein L35 OS=Homo sapiens GN=RPL35 PE=1 SV=2 - [RL35\_HUMAN]  
 Q9Y580 RNA-binding protein 7 OS=Homo sapiens GN=RBM7 PE=1 SV=1 - [RBM7\_HUMAN]  
 Q9BXB4 Oxysterol-binding protein-related protein 11 OS=Homo sapiens GN=OSBP11 PE=1 SV=2 - [OSB11\_HUMAN]  
 P09234 U1 small nuclear ribonucleoprotein C OS=Homo sapiens GN=SNRPC PE=1 SV=1 - [RU1C\_HUMAN]  
 Q9BSV6 tRNA-splicing endonuclease subunit Sen34 OS=Homo sapiens GN=TSN34 PE=1 SV=1 - [SEN34\_HUMAN]  
 Q9NUQ7 Ufm1-specific protease 2 OS=Homo sapiens GN=UFS2 PE=1 SV=3 - [UFS2\_HUMAN]  
 P10114 Ras-related protein Rap-2a OS=Homo sapiens GN=RAP2A PE=1 SV=1 - [RAP2A\_HUMAN]  
 Q9NZL4 Hsp70-binding protein 1 OS=Homo sapiens GN=HSPBP1 PE=1 SV=1 - [HPBP1\_HUMAN]  
 P55060 Exportin-2 OS=Homo sapiens GN=CSE1L PE=1 SV=3 - [XPO2\_HUMAN]  
 Q9UHD2 Serine/threonine-protein kinase TBK1 OS=Homo sapiens GN=TBK1 PE=1 SV=1 - [TBK1\_HUMAN]  
 Q9H0B6 Kinesin light chain 2 OS=Homo sapiens GN=KLC2 PE=1 SV=1 - [KLC2\_HUMAN]  
 P22694 cAMP-dependent protein kinase catalytic subunit beta OS=Homo sapiens GN=PRKACB PE=1 SV=2 - [KAPCB\_HUMAN]  
 Q92925 SWI/SNF-related matrix-associated actin-dependent regulator of chromatin subfamily D member 2 OS=Homo sapiens GN=SMARCD2 PE=1 SV=3 - [SMRD2\_HUMAN]  
 Q96D46 60S ribosomal export protein NMD3 OS=Homo sapiens GN=NMD3 PE=1 SV=1 - [NMD3\_HUMAN]  
 Q9BV44 THUMP domain-containing protein 3 OS=Homo sapiens GN=THUMP3 PE=1 SV=1 - [THUM3\_HUMAN]  
 Q92783 Signal transducing adapter molecule 1 OS=Homo sapiens GN=STAM PE=1 SV=3 - [STAM1\_HUMAN]  
 Q9NRX1 RNA-binding protein PNO1 OS=Homo sapiens GN=PNO1 PE=1 SV=1 - [PNO1\_HUMAN]  
 Q9UMF0 Intercellular adhesion molecule 5 OS=Homo sapiens GN=ICAM5 PE=1 SV=3 - [ICAM5\_HUMAN]  
 Q9HC35 Echinoderm microtubule-associated protein-like 4 OS=Homo sapiens GN=EML4 PE=1 SV=3 - [EMAL4\_HUMAN]  
 Q9UJA5 tRNA (adenine(58)-N(1))-methyltransferase non-catalytic subunit TRM6 OS=Homo sapiens GN=TRM6 PE=1 SV=1 - [TRM6\_HUMAN]  
 P55036 26S proteasome non-ATPase regulatory subunit 4 OS=Homo sapiens GN=PSMD4 PE=1 SV=1 - [PSMD4\_HUMAN]  
 O14908 PDZ domain-containing protein GIPC1 OS=Homo sapiens GN=GIPC1 PE=1 SV=2 - [GIPC1\_HUMAN]  
 P06276 Cholinesterase OS=Homo sapiens GN=BCHE PE=1 SV=1 - [CHLE\_HUMAN]  
 Q9U1V1 CCR4-NOT transcription complex subunit 7 OS=Homo sapiens GN=CNOT7 PE=1 SV=3 - [CNOT7\_HUMAN]  
 Q9Y218 WD repeat-containing protein 37 OS=Homo sapiens GN=WDR37 PE=1 SV=2 - [WDR37\_HUMAN]  
 P17301 Integrin alpha-2 OS=Homo sapiens GN=ITGA2 PE=1 SV=1 - [ITA2\_HUMAN]  
 Q6NZY4 Zinc finger CCHC domain-containing protein 8 OS=Homo sapiens GN=ZCCHC8 PE=1 SV=2 - [ZCHC8\_HUMAN]  
 Q9NUP1 Biogenesis of lysosome-related organelles complex 1 subunit 4 OS=Homo sapiens GN=BLOC1S4 PE=1 SV=1 - [BL1S4\_HUMAN]  
 Q9H9Y6 DNA-directed RNA polymerase I subunit RPA2 OS=Homo sapiens GN=POLR1B PE=1 SV=2 - [RPA2\_HUMAN]  
 P27695 DNA-(apurinic or apyrimidinic site) lyase OS=Homo sapiens GN=APEX1 PE=1 SV=2 - [APEX1\_HUMAN]  
 P12109 Collagen alpha-1(VI) chain OS=Homo sapiens GN=COL6A1 PE=1 SV=3 - [CO6A1\_HUMAN]  
 Q14103 Heterogeneous nuclear ribonucleoprotein D0 OS=Homo sapiens GN=HNRNPD PE=1 SV=1 - [HNRPD\_HUMAN]  
 Q6QNY0 Biogenesis of lysosome-related organelles complex 1 subunit 3 OS=Homo sapiens GN=BLOC1S3 PE=1 SV=1 - [BL1S3\_HUMAN]  
 Q9BW83 Intraflagellar transport protein 27 homolog OS=Homo sapiens GN=IFT27 PE=1 SV=1 - [IFT27\_HUMAN]  
 Q93100 Phosphorylase b kinase regulatory subunit beta OS=Homo sapiens GN=PHKB PE=1 SV=3 - [KPBB\_HUMAN]  
 Q9Y4K0 Lysyl oxidase homolog 2 OS=Homo sapiens GN=LOXL2 PE=1 SV=1 - [LOXL2\_HUMAN]  
 Q9BW92 Threonine-tRNA ligase, mitochondrial OS=Homo sapiens GN=TARS2 PE=1 SV=1 - [SYTM\_HUMAN]  
 P26373 60S ribosomal protein L13 OS=Homo sapiens GN=RPL13 PE=1 SV=4 - [RL13\_HUMAN]  
 P34896 Serine hydroxymethyltransferase, cytosolic OS=Homo sapiens GN=SHMT1 PE=1 SV=1 - [GLYC\_HUMAN]  
 Q13148 TAR DNA-binding protein 43 OS=Homo sapiens GN=TARDBP PE=1 SV=1 - [TADBP\_HUMAN]  
 Q5RKV6 Exosome complex component MTR3 OS=Homo sapiens GN=EXOSC6 PE=1 SV=1 - [EXOS6\_HUMAN]  
 Q72627 E3 ubiquitin-protein ligase HUWE1 OS=Homo sapiens GN=HUWE1 PE=1 SV=3 - [HUWE1\_HUMAN]  
 Q9Y5K5 Ubiquitin carboxyl-terminal hydrolase isozyme L5 OS=Homo sapiens GN=UCHL5 PE=1 SV=3 - [UCHL5\_HUMAN]  
 P01889 HLA class I histocompatibility antigen, B-7 alpha chain OS=Homo sapiens GN=HLA-B PE=1 SV=3 - [1B07\_HUMAN]  
 P09960 Leukotriene A-4 hydrolase OS=Homo sapiens GN=LTA4H PE=1 SV=2 - [LKH4\_HUMAN]  
 P55209 Nucleosome assembly protein 1-like 1 OS=Homo sapiens GN=NAP1L1 PE=1 SV=1 - [NP1L1\_HUMAN]  
 Q14847 LIM and SH3 domain protein 1 OS=Homo sapiens GN=LASP1 PE=1 SV=2 - [LASP1\_HUMAN]  
 Q9BX67 Junctional adhesion molecule C OS=Homo sapiens GN=JAM3 PE=1 SV=1 - [JAM3\_HUMAN]  
 Q9BXZ2 Uridine-cytidine kinase 2 OS=Homo sapiens GN=UCK2 PE=1 SV=1 - [UCK2\_HUMAN]  
 P48509 CD151 antigen OS=Homo sapiens GN=CD151 PE=1 SV=3 - [CD151\_HUMAN]  
 P84098 60S ribosomal protein L19 OS=Homo sapiens GN=RPL19 PE=1 SV=1 - [RL19\_HUMAN]  
 O14531 Dihydropyridinase-related protein 4 OS=Homo sapiens GN=DPYSL4 PE=1 SV=2 - [DPYL4\_HUMAN]  
 O43491 Band 4.1-like protein 2 OS=Homo sapiens GN=EPBA1L2 PE=1 SV=1 - [E41L2\_HUMAN]  
 P06280 Alpha-galactosidase A OS=Homo sapiens GN=GLA PE=1 SV=1 - [AGAL\_HUMAN]  
 O43639 Cytoplasmic protein NCK2 OS=Homo sapiens GN=NCK2 PE=1 SV=2 - [NCK2\_HUMAN]  
 O95352 Ubiquitin-like modifier-activating enzyme ATG7 OS=Homo sapiens GN=ATG7 PE=1 SV=1 - [ATG7\_HUMAN]  
 Q9NZ88 CCR4-NOT transcription complex subunit 2 OS=Homo sapiens GN=CNOT2 PE=1 SV=1 - [CNOT2\_HUMAN]  
 P05026 Sodium/potassium-transporting ATPase subunit beta-1 OS=Homo sapiens GN=ATP1B1 PE=1 SV=1 - [AT1B1\_HUMAN]  
 P20073 Annexin A7 OS=Homo sapiens GN=ANXA7 PE=1 SV=3 - [ANXA7\_HUMAN]  
 Q96MG7 Melanoma-associated antigen G1 OS=Homo sapiens GN=NDNL2 PE=1 SV=1 - [MAGG1\_HUMAN]  
 Q9Y2D4 Exocyst complex component 6B OS=Homo sapiens GN=EXOC6B PE=1 SV=3 - [EXC6B\_HUMAN]  
 Q15785 Mitochondrial import receptor subunit TOM34 OS=Homo sapiens GN=TOMM34 PE=1 SV=2 - [TOM34\_HUMAN]  
 Q9Y450 HBS1-like protein OS=Homo sapiens GN=HBS1L PE=1 SV=1 - [HBS1L\_HUMAN]  
 Q9UPY3 Endoribonuclease Dicer OS=Homo sapiens GN=DICER1 PE=1 SV=3 - [DICER\_HUMAN]  
 Q15007 Pre-mRNA-splicing regulator WTAP OS=Homo sapiens GN=WTAP PE=1 SV=2 - [FL2D\_HUMAN]  
 O00754 Lysosomal alpha-mannosidase OS=Homo sapiens GN=MAN2B1 PE=1 SV=3 - [MA2B1\_HUMAN]  
 Q8NFH4 Nucleoporin Nup37 OS=Homo sapiens GN=NUP37 PE=1 SV=1 - [NUP37\_HUMAN]  
 Q16851 UTP-glucose-1-phosphate uridylyltransferase OS=Homo sapiens GN=UGP2 PE=1 SV=5 - [UGPA\_HUMAN]  
 P07858 Cathepsin B OS=Homo sapiens GN=CTSB PE=1 SV=3 - [CATB\_HUMAN]  
 Q15063 Periostin OS=Homo sapiens GN=POSTN PE=1 SV=2 - [POSTN\_HUMAN]  
 P54886 Delta-1-pyrroline-5-carboxylate synthase OS=Homo sapiens GN=ALDH18A1 PE=1 SV=2 - [P5CS\_HUMAN]  
 O14777 Kinetochore protein NDC80 homolog OS=Homo sapiens GN=NDC80 PE=1 SV=1 - [NDC80\_HUMAN]  
 Q58A45 PAB-dependent poly(A)-specific ribonuclease subunit PAN3 OS=Homo sapiens GN=PAN3 PE=1 SV=3 - [PAN3\_HUMAN]  
 Q9NWZ5 Uridine-cytidine kinase-like 1 OS=Homo sapiens GN=UCKL1 PE=1 SV=2 - [UCKL1\_HUMAN]  
 Q8N1B4 Vacuolar protein sorting-associated protein 52 homolog OS=Homo sapiens GN=VPS52 PE=1 SV=1 - [VPS52\_HUMAN]  
 Q9P210 Cleavage and polyadenylation specificity factor subunit 2 OS=Homo sapiens GN=CPSF2 PE=1 SV=2 - [CPSF2\_HUMAN]  
 O14910 Protein lin-7 homolog A OS=Homo sapiens GN=LINTA PE=1 SV=2 - [LINTA\_HUMAN]  
 Q60841 Eukaryotic translation initiation factor 5B OS=Homo sapiens GN=EIF5B PE=1 SV=4 - [IF2P\_HUMAN]  
 O95071 E3 ubiquitin-protein ligase UBR5 OS=Homo sapiens GN=UBR5 PE=1 SV=2 - [UBR5\_HUMAN]  
 Q9HAD4 WD repeat-containing protein 41 OS=Homo sapiens GN=WDR41 PE=2 SV=3 - [WDR41\_HUMAN]  
 Q58FF7 Putative heat shock protein HSP 90-beta-3 OS=Homo sapiens GN=HSP90AB3 PE=5 SV=1 - [H90B3\_HUMAN]  
 Q8N2S1 Latent-transforming growth factor beta-binding protein 4 OS=Homo sapiens GN=LTBP4 PE=1 SV=2 - [LTBP4\_HUMAN]  
 P16403 Histone H1.2 OS=Homo sapiens GN=HIST1HC PE=1 SV=2 - [H12\_HUMAN]

Q9Y597 BTB/POZ domain-containing protein KCTD3 OS=Homo sapiens GN=KCTD3 PE=1 SV=2 - [KCTD3\_HUMAN]  
 Q9BT08 Metastasis-associated protein MTA3 OS=Homo sapiens GN=MTA3 PE=1 SV=2 - [MTA3\_HUMAN]  
 P55039 Developmentally-regulated GTP-binding protein 2 OS=Homo sapiens GN=DRG2 PE=1 SV=1 - [DRG2\_HUMAN]  
 Q9P273 Teneurin OS=Homo sapiens GN=TNM3 PE=2 SV=3 - [TN3\_HUMAN]  
 P42566 Epidermal growth factor receptor substrate 15 OS=Homo sapiens GN=EPS15 PE=1 SV=2 - [EPS15\_HUMAN]  
 P09884 DNA polymerase alpha catalytic subunit OS=Homo sapiens GN=POLA1 PE=1 SV=2 - [DPOLA\_HUMAN]  
 Q55ZK8 FRAS1-related extracellular matrix protein 2 OS=Homo sapiens GN=FRM2 PE=1 SV=2 - [FRM2\_HUMAN]  
 P12235 ADP/ATP translocase 1 OS=Homo sapiens GN=SLC25A4 PE=1 SV=4 - [ADT1\_HUMAN]  
 P58107 Epiplakin OS=Homo sapiens GN=EPPK1 PE=1 SV=2 - [EPIPL\_HUMAN]  
 P54760 Ephrin type-B receptor 4 OS=Homo sapiens GN=EPHB4 PE=1 SV=2 - [EPHB4\_HUMAN]  
 Q99715 Collagen alpha-1(XI) chain OS=Homo sapiens GN=COL12A1 PE=1 SV=2 - [COCA1\_HUMAN]  
 P10600 Transforming growth factor beta-3 OS=Homo sapiens GN=TFGB3 PE=1 SV=1 - [TFGB3\_HUMAN]  
 Q96PU5 E3 ubiquitin-protein ligase NEDD4-like OS=Homo sapiens GN=NEDD4L PE=1 SV=2 - [NED4L\_HUMAN]  
 P23246 Splicing factor, proline- and glutamine-rich OS=Homo sapiens GN=SFQ PE=1 SV=2 - [SFQ\_HUMAN]  
 Q07864 DNA polymerase epsilon catalytic subunit A OS=Homo sapiens GN=POLE PE=1 SV=5 - [DPOE1\_HUMAN]  
 Q9BWU0 Kanadaplin OS=Homo sapiens GN=SLC4A1AP PE=1 SV=1 - [NADAP\_HUMAN]  
 P62633 Cellular nucleic acid-binding protein OS=Homo sapiens GN=CNBP PE=1 SV=1 - [CNBP\_HUMAN]  
 Q9H6R7 WD repeat and coiled-coil-containing protein C2orf44 OS=Homo sapiens GN=C2orf44 PE=1 SV=1 - [CB044\_HUMAN]  
 P00568 Adenylate kinase isoenzyme 1 OS=Homo sapiens GN=AK1 PE=1 SV=3 - [KAD1\_HUMAN]  
 Q8WFX1 Paraspeckle component 1 OS=Homo sapiens GN=PSPC1 PE=1 SV=1 - [PSPC1\_HUMAN]  
 P51571 Translocon-associated protein subunit delta OS=Homo sapiens GN=SSR4 PE=1 SV=1 - [SSRD\_HUMAN]  
 Q10471 Polypeptide N-acetylgalactosaminyltransferase 2 OS=Homo sapiens GN=GALNT2 PE=1 SV=1 - [GAL2\_HUMAN]  
 Q96B97 SH3 domain-containing kinase-binding protein 1 OS=Homo sapiens GN=SH3KBP1 PE=1 SV=2 - [SH3K1\_HUMAN]  
 Q9UG63 ATP-binding cassette sub-family F member 2 OS=Homo sapiens GN=ABCF2 PE=1 SV=2 - [ABCF2\_HUMAN]  
 P09668 Pro-cathepsin H OS=Homo sapiens GN=CTSH PE=1 SV=4 - [CATH\_HUMAN]  
 P49841 Glycogen synthase kinase-3 beta OS=Homo sapiens GN=GSK3B PE=1 SV=2 - [GSK3B\_HUMAN]  
 P38646 Stress-70 protein, mitochondrial OS=Homo sapiens GN=HSPA9 PE=1 SV=2 - [GRP75\_HUMAN]  
 Q9Y220 Suppressor of G2 allele of SKP1 homolog OS=Homo sapiens GN=SUGT1 PE=1 SV=3 - [SUGT1\_HUMAN]  
 Q14654 Insulin receptor substrate 4 OS=Homo sapiens GN=IRS4 PE=1 SV=1 - [IRS4\_HUMAN]  
 Q14444 Caprin-1 OS=Homo sapiens GN=CAPRIN1 PE=1 SV=2 - [CAPR1\_HUMAN]  
 Q06013 15 kDa selenoprotein OS=Homo sapiens GN=SEP15 PE=1 SV=3 - [SEP15\_HUMAN]  
 Q9Y376 Calcium-binding protein 39 OS=Homo sapiens GN=CAB39 PE=1 SV=1 - [CAB39\_HUMAN]  
 Q9Y3E7 Charged multivesicular body protein 3 OS=Homo sapiens GN=CHMP3 PE=1 SV=3 - [CHMP3\_HUMAN]  
 Q6F181 Anamorfin OS=Homo sapiens GN=CIAPIN1 PE=1 SV=2 - [CPIN1\_HUMAN]  
 Q6UWK1 Chondroitin sulfate proteoglycan 4 OS=Homo sapiens GN=CSPG4 PE=1 SV=2 - [CSPG4\_HUMAN]  
 P51151 Ras-related protein Rab-9A OS=Homo sapiens GN=RAB9A PE=1 SV=1 - [RAB9A\_HUMAN]  
 Q96AC1 Fermitin family homolog 2 OS=Homo sapiens GN=FERMT2 PE=1 SV=1 - [FERM2\_HUMAN]  
 P46108 Adapter molecule crk OS=Homo sapiens GN=CRK PE=1 SV=2 - [CRK\_HUMAN]  
 Q13308 Inactive tyrosine-protein kinase 7 OS=Homo sapiens GN=PTK7 PE=1 SV=2 - [PTK7\_HUMAN]  
 Q15813 Tubulin-specific chaperone E OS=Homo sapiens GN=TBCE PE=1 SV=1 - [TBCE\_HUMAN]  
 Q81UR7 Armadillo repeat-containing protein 8 OS=Homo sapiens GN=ARMC8 PE=1 SV=2 - [ARMC8\_HUMAN]  
 Q9NPJ6 Mediator of RNA polymerase II transcription subunit 4 OS=Homo sapiens GN=MED4 PE=1 SV=1 - [MED4\_HUMAN]  
 P49674 Casein kinase I isoform epsilon OS=Homo sapiens GN=CSNK1E PE=1 SV=1 - [K1E\_HUMAN]  
 Q96CT7 Coiled-coil domain-containing protein 124 OS=Homo sapiens GN=CCDC124 PE=1 SV=1 - [CC124\_HUMAN]  
 Q9NU22 Midasin OS=Homo sapiens GN=MDN1 PE=1 SV=2 - [MDN1\_HUMAN]  
 Q06264 SW1/SNF-related matrix-associated actin-dependent regulator of chromatin subfamily A member 5 OS=Homo sapiens GN=SMARCA5 PE=1 SV=1 - [SMCA5\_HUMAN]  
 P17174 Aspartate aminotransferase, cytoplasmic OS=Homo sapiens GN=GOT1 PE=1 SV=3 - [AATC\_HUMAN]  
 Q9NPD7 Neuritin OS=Homo sapiens GN=NRN1 PE=2 SV=1 - [NRN1\_HUMAN]  
 Q00308 NEDD4-like E3 ubiquitin-protein ligase WWP2 OS=Homo sapiens GN=WWP2 PE=1 SV=2 - [WWP2\_HUMAN]  
 Q9UBD5 Origin recognition complex subunit 3 OS=Homo sapiens GN=ORC3 PE=1 SV=1 - [ORC3\_HUMAN]  
 Q9B372 Inosine triphosphate pyrophosphatase OS=Homo sapiens GN=ITPA PE=1 SV=2 - [ITPA\_HUMAN]  
 Q43766 Asparagine--tRNA ligase, cytoplasmic OS=Homo sapiens GN=NARS PE=1 SV=1 - [SYNC\_HUMAN]  
 P63096 Guanine nucleotide-binding protein (G*i*) subunit alpha-1 OS=Homo sapiens GN=GNAI1 PE=1 SV=2 - [GNAI1\_HUMAN]  
 Q05193 Dynamin-1 OS=Homo sapiens GN=DNM1 PE=1 SV=2 - [DYN1\_HUMAN]  
 Q9NUQ9 Protein FAM49B OS=Homo sapiens GN=FAM49B PE=1 SV=1 - [FA49B\_HUMAN]  
 P05423 DNA-directed RNA polymerase III subunit RPC4 OS=Homo sapiens GN=POLR3D PE=1 SV=2 - [RPC4\_HUMAN]  
 Q92974 Rho guanine nucleotide exchange factor 2 OS=Homo sapiens GN=ARHGEF2 PE=1 SV=4 - [ARHG2\_HUMAN]  
 Q9BV19 Uncharacterized protein Clorf50 OS=Homo sapiens GN=Clorf50 PE=1 SV=2 - [CA050\_HUMAN]  
 P11413 Glucose-6-phosphate 1-dehydrogenase OS=Homo sapiens GN=G6PD PE=1 SV=4 - [G6PD\_HUMAN]  
 Q2M389 WASH complex subunit 7 OS=Homo sapiens GN=KIAA1033 PE=1 SV=2 - [WASH7\_HUMAN]  
 Q8WUN7 Ubiquitin domain-containing protein 2 OS=Homo sapiens GN=UBTD2 PE=1 SV=2 - [UBTD2\_HUMAN]  
 Q94927 HAUS augmin-like complex subunit 5 OS=Homo sapiens GN=HAUS5 PE=1 SV=2 - [HAUS5\_HUMAN]  
 P15170 Eukaryotic peptide chain release factor GTP-binding subunit ERF3A OS=Homo sapiens GN=GSP1 PE=1 SV=1 - [ERF3A\_HUMAN]  
 Q15226 NF-kappa-B-repressing factor OS=Homo sapiens GN=NKRF PE=1 SV=2 - [NKRF\_HUMAN]  
 P62070 Ras-related protein R-Ras2 OS=Homo sapiens GN=RRAS2 PE=1 SV=1 - [RRAS2\_HUMAN]  
 Q9BV20 Methylthioribose-1-phosphate isomerase OS=Homo sapiens GN=MRI1 PE=1 SV=1 - [MTNA\_HUMAN]  
 Q06050 Protein O-GlcNAcase OS=Homo sapiens GN=MGEA5 PE=1 SV=2 - [OGA\_HUMAN]  
 Q9UM54 Unconventional myosin-VI OS=Homo sapiens GN=MYO6 PE=1 SV=4 - [MYO6\_HUMAN]  
 P07947 Tyrosine-protein kinase Yes OS=Homo sapiens GN=YES1 PE=1 SV=3 - [YES\_HUMAN]  
 Q13435 Splicing factor 3B subunit 2 OS=Homo sapiens GN=SF3B2 PE=1 SV=2 - [SF3B2\_HUMAN]  
 Q75954 Tetraspanin-9 OS=Homo sapiens GN=TSPAN9 PE=1 SV=1 - [TSN9\_HUMAN]  
 Q13464 Rho-associated protein kinase 1 OS=Homo sapiens GN=ROCK1 PE=1 SV=1 - [ROCK1\_HUMAN]  
 Q719H9 BTB/POZ domain-containing protein KCTD1 OS=Homo sapiens GN=KCTD1 PE=1 SV=1 - [KCTD1\_HUMAN]  
 Q8NE71 ATP-binding cassette sub-family F member 1 OS=Homo sapiens GN=ABCF1 PE=1 SV=2 - [ABCF1\_HUMAN]  
 Q16658 Fascin OS=Homo sapiens GN=FSCN1 PE=1 SV=3 - [FSCN1\_HUMAN]  
 Q9UMX0 Ubiquilin-1 OS=Homo sapiens GN=UBQLN1 PE=1 SV=2 - [UBQL1\_HUMAN]  
 Q15379 Histone deacetylase 3 OS=Homo sapiens GN=HDAC3 PE=1 SV=2 - [HDAC3\_HUMAN]  
 P39687 Acidic leucine-rich nuclear phosphoprotein 32 family member A OS=Homo sapiens GN=ANP32A PE=1 SV=1 - [AN32A\_HUMAN]  
 Q9HJ2 39S ribosomal protein L44, mitochondrial OS=Homo sapiens GN=MRPL44 PE=1 SV=1 - [RM44\_HUMAN]  
 P33240 Cleavage stimulation factor subunit 2 OS=Homo sapiens GN=CSTF2 PE=1 SV=1 - [CSTF2\_HUMAN]  
 Q81X12 Cell division cycle and apoptosis regulator protein 1 OS=Homo sapiens GN=CCAR1 PE=1 SV=2 - [CCAR1\_HUMAN]  
 Q14979 Heterogeneous nuclear ribonucleoprotein D-like OS=Homo sapiens GN=HNRNPD1 PE=1 SV=3 - [HNRDL\_HUMAN]  
 Q8N122 Regulatory-associated protein of mTOR OS=Homo sapiens GN=RPTOR PE=1 SV=1 - [RPTOR\_HUMAN]  
 Q15232 Matrilin-3 OS=Homo sapiens GN=MATN3 PE=1 SV=2 - [MATN3\_HUMAN]  
 P61421 V-type proton ATPase subunit d 1 OS=Homo sapiens GN=ATP6VOD1 PE=1 SV=1 - [VAOD1\_HUMAN]  
 Q86UP2 Kinectin OS=Homo sapiens GN=KTN1 PE=1 SV=1 - [KTN1\_HUMAN]  
 Q9UJX6 Anaphase-promoting complex subunit 2 OS=Homo sapiens GN=ANAPC2 PE=1 SV=1 - [ANPC2\_HUMAN]  
 Q13363 C-terminal-binding protein 1 OS=Homo sapiens GN=CTBP1 PE=1 SV=2 - [CTBP1\_HUMAN]  
 Q969Y0 NXPE family member 3 OS=Homo sapiens GN=NXPE3 PE=2 SV=1 - [NXPE3\_HUMAN]  
 A6NH7 Protein unc-119 homolog B OS=Homo sapiens GN=UNC119B PE=1 SV=1 - [U119B\_HUMAN]  
 Q9NR09 Baculoviral IAP repeat-containing protein 6 OS=Homo sapiens GN=BIRC6 PE=1 SV=2 - [BIRC6\_HUMAN]  
 Q8N474 Rho guanine nucleotide exchange factor 39 OS=Homo sapiens GN=ARHGEF39 PE=1 SV=1 - [ARG39\_HUMAN]  
 P51003 Poly(A) polymerase alpha OS=Homo sapiens GN=PAPOLA PE=1 SV=4 - [PAP0A\_HUMAN]  
 P20674 Cytochrome c oxidase subunit 5A, mitochondrial OS=Homo sapiens GN=COX5A PE=1 SV=2 - [COX5A\_HUMAN]  
 Q81XM2 Chromatin complexes subunit BAP18 OS=Homo sapiens GN=BAP18 PE=1 SV=1 - [BAP18\_HUMAN]  
 Q96EY4 Translation machinery-associated protein 16 OS=Homo sapiens GN=TMA16 PE=1 SV=2 - [TMA16\_HUMAN]  
 P05156 Complement factor 1 OS=Homo sapiens GN=CF1 PE=1 SV=2 - [CFA1\_HUMAN]  
 Q96G46 tRNA-dihydrouridine(47) synthase [NAD(P)(+)-like] OS=Homo sapiens GN=DUS3L PE=1 SV=2 - [DUS3L\_HUMAN]  
 Q06942 mRNA-capping enzyme OS=Homo sapiens GN=RNGTT PE=1 SV=1 - [MCE1\_HUMAN]  
 Q99570 Phosphoinositide 3-kinase regulatory subunit 4 OS=Homo sapiens GN=PIK3R4 PE=1 SV=3 - [PI3R4\_HUMAN]  
 Q9UN86 Ras GTPase-activating protein-binding protein 2 OS=Homo sapiens GN=G3BP2 PE=1 SV=2 - [G3BP2\_HUMAN]  
 Q75150 E3 ubiquitin-protein ligase BRE1B OS=Homo sapiens GN=RNF40 PE=1 SV=4 - [BRE1B\_HUMAN]  
 P13804 Electron transfer flavoprotein subunit alpha, mitochondrial OS=Homo sapiens GN=ETFA PE=1 SV=1 - [ETFA\_HUMAN]  
 Q9Y5Y2 Cytosolic Fe-S cluster assembly factor NUBP2 OS=Homo sapiens GN=NUBP2 PE=1 SV=1 - [NUBP2\_HUMAN]  
 Q76094 Signal recognition particle subunit SRP72 OS=Homo sapiens GN=SRP72 PE=1 SV=3 - [SRP72\_HUMAN]  
 P02768 Serum albumin OS=Homo sapiens GN=ALB PE=1 SV=2 - [ALBU\_HUMAN]  
 Q96C19 EF-hand domain-containing protein D2 OS=Homo sapiens GN=EFHD2 PE=1 SV=1 - [EFHD2\_HUMAN]  
 P11387 DNA topoisomerase 1 OS=Homo sapiens GN=TOP1 PE=1 SV=2 - [TOP1\_HUMAN]  
 Q6YHU6 Thyroid adenoma-associated protein OS=Homo sapiens GN=THADA PE=1 SV=1 - [THADA\_HUMAN]  
 Q723U7 Protein MON2 homolog OS=Homo sapiens GN=MON2 PE=1 SV=3 - [MON2\_HUMAN]  
 Q9H1A4 Anaphase-promoting complex subunit 1 OS=Homo sapiens GN=ANAPC1 PE=1 SV=1 - [APC1\_HUMAN]  
 Q92824 Proprotein convertase subtilisin/kexin type 5 OS=Homo sapiens GN=PCSK5 PE=1 SV=4 - [PCSK5\_HUMAN]  
 Q81XB1 DnaJ homolog subfamily C member 10 OS=Homo sapiens GN=DNAJC10 PE=1 SV=2 - [DJC10\_HUMAN]  
 Q81Y18 Structural maintenance of chromosomes protein 5 OS=Homo sapiens GN=SMC5 PE=1 SV=2 - [SMC5\_HUMAN]  
 Q01085 Nucleolysin TIAR OS=Homo sapiens GN=TIAL1 PE=1 SV=1 - [TIAR\_HUMAN]

Q16342 Programmed cell death protein 2 OS=Homo sapiens GN=PCDC2 PE=1 SV=2 - [PCDC2\_HUMAN]  
 Q95716 Ras-related protein Rab-3D OS=Homo sapiens GN=RAB3D PE=1 SV=1 - [RAB3D\_HUMAN]  
 Q43765 Small glutamine-rich tetratricopeptide repeat-containing protein alpha OS=Homo sapiens GN=SGTA PE=1 SV=1 - [SGTA\_HUMAN]  
 Q5VTR2 E3 ubiquitin-protein ligase BRE1A OS=Homo sapiens GN=RNF20 PE=1 SV=2 - [BRE1A\_HUMAN]  
 P20700 Lamin-B1 OS=Homo sapiens GN=LMBN1 PE=1 SV=2 - [LMBN1\_HUMAN]  
 Q9V6D5 Brefeldin A-inhibited guanine nucleotide-exchange protein 2 OS=Homo sapiens GN=ARFGEP2 PE=1 SV=3 - [BIG2\_HUMAN]  
 Q96CS2 HAUS augmin-like complex subunit 1 OS=Homo sapiens GN=HAUS1 PE=1 SV=1 - [HAUS1\_HUMAN]  
 P37235 Hippocalcin-like protein 1 OS=Homo sapiens GN=HPCAL1 PE=1 SV=3 - [HPCAL1\_HUMAN]  
 P19086 Guanine nucleotide-binding protein G(z) subunit alpha OS=Homo sapiens GN=GNAZ PE=2 SV=3 - [GNAZ\_HUMAN]  
 Q9H8K7 Uncharacterized protein C10orf88 OS=Homo sapiens GN=C10orf88 PE=1 SV=2 - [C10orf88\_HUMAN]  
 P18074 TFIIF basal transcription factor complex helicase XPD subunit OS=Homo sapiens GN=ERCC2 PE=1 SV=1 - [ERCC2\_HUMAN]  
 P00367 Glutamate dehydrogenase 1, mitochondrial OS=Homo sapiens GN=GLUD1 PE=1 SV=2 - [DH3\_HUMAN]  
 P15927 Replication protein A 32 kDa subunit OS=Homo sapiens GN=RPA2 PE=1 SV=1 - [RPA2\_HUMAN]  
 Q92832 Protein kinase C-binding protein NELL1 OS=Homo sapiens GN=NELL1 PE=1 SV=4 - [NELL1\_HUMAN]  
 Q92879 CUGBP Elav-like family member 1 OS=Homo sapiens GN=CELF1 PE=1 SV=2 - [CELF1\_HUMAN]  
 P35221 Catenin alpha-1 OS=Homo sapiens GN=CTNNA1 PE=1 SV=1 - [CTNNA1\_HUMAN]  
 Q15758 Neutral amino acid transporter B(0) OS=Homo sapiens GN=SLC1A5 PE=1 SV=2 - [AAAT\_HUMAN]  
 Q9C0D3 Protein zyg-11 homolog B OS=Homo sapiens GN=ZYG11B PE=1 SV=2 - [ZY11B\_HUMAN]  
 Q9H9A5 CCR4-NOT transcription complex subunit 10 OS=Homo sapiens GN=CNOT10 PE=1 SV=1 - [CN010\_HUMAN]  
 P48730 Casein kinase I isoform delta OS=Homo sapiens GN=CSNK1D PE=1 SV=2 - [KC1D\_HUMAN]  
 Q9NXC5 WD repeat-containing protein mio OS=Homo sapiens GN=MIO5 PE=1 SV=2 - [MIO\_HUMAN]  
 Q75494 Serine/arginine-rich splicing factor 10 OS=Homo sapiens GN=SRSF10 PE=1 SV=1 - [SRS10\_HUMAN]  
 Q9NVH2 Integrator complex subunit 7 OS=Homo sapiens GN=INTS7 PE=1 SV=1 - [INT7\_HUMAN]  
 Q9RXW9 Fanconi anemia group D2 protein OS=Homo sapiens GN=FANCD2 PE=1 SV=2 - [FACD2\_HUMAN]  
 Q00399 Dynactin subunit 6 OS=Homo sapiens GN=DCTN6 PE=1 SV=1 - [DCTN6\_HUMAN]  
 P54646 5'-AMP-activated protein kinase catalytic subunit alpha-2 OS=Homo sapiens GN=PRKAA2 PE=1 SV=2 - [AAPK2\_HUMAN]  
 Q9Y5L0 Transportin-3 OS=Homo sapiens GN=TNPO3 PE=1 SV=3 - [TNPO3\_HUMAN]  
 Q9B6V8 E3 ubiquitin-protein ligase RNF126 OS=Homo sapiens GN=RNF126 PE=1 SV=1 - [RN126\_HUMAN]  
 Q9Y2L5 Trafficking protein particle complex subunit 8 OS=Homo sapiens GN=TRAPPC8 PE=1 SV=2 - [TPPC8\_HUMAN]  
 Q9Y294 Histone chaperone ASF1A OS=Homo sapiens GN=ASF1A PE=1 SV=1 - [ASF1A\_HUMAN]  
 P06744 Glucose-6-phosphate isomerase OS=Homo sapiens GN=GPI PE=1 SV=4 - [GGPI\_HUMAN]  
 Q9UPF5 Exocyst complex component 7 OS=Homo sapiens GN=EXOC7 PE=1 SV=3 - [EXOC7\_HUMAN]  
 Q6P1J9 Parafibromin OS=Homo sapiens GN=CDC73 PE=1 SV=1 - [CDC73\_HUMAN]  
 Q15528 Mediator of RNA polymerase II transcription subunit 22 OS=Homo sapiens GN=MED22 PE=1 SV=2 - [MED22\_HUMAN]  
 Q86VX2 COMM domain-containing protein 7 OS=Homo sapiens GN=COMM7 PE=1 SV=2 - [COMD7\_HUMAN]  
 Q8N163 Cell cycle and apoptosis regulator protein 2 OS=Homo sapiens GN=CCAR2 PE=1 SV=2 - [CCAR2\_HUMAN]  
 Q72392 Trafficking protein particle complex subunit 11 OS=Homo sapiens GN=TRAPP11 PE=1 SV=2 - [TPC11\_HUMAN]  
 Q9NTK5 Ogb-like ATPase 1 OS=Homo sapiens GN=OLA1 PE=1 SV=2 - [OLA1\_HUMAN]  
 Q9Y366 Intraflagellar transport protein 52 homolog OS=Homo sapiens GN=IFT52 PE=2 SV=3 - [IFT52\_HUMAN]  
 Q00255 Menin OS=Homo sapiens GN=MEN1 PE=1 SV=4 - [MEN1\_HUMAN]  
 P41214 Eukaryotic translation initiation factor 2D OS=Homo sapiens GN=EIF2D PE=1 SV=3 - [EIF2D\_HUMAN]  
 P54652 Heat shock-related 70 kDa protein 2 OS=Homo sapiens GN=HSPA2 PE=1 SV=1 - [HSP72\_HUMAN]  
 P46779 60S ribosomal protein L28 OS=Homo sapiens GN=RPL28 PE=1 SV=3 - [RL28\_HUMAN]  
 Q8ND04 Protein SMG8 OS=Homo sapiens GN=SMG8 PE=1 SV=1 - [SMG8\_HUMAN]  
 Q15149 Plectin OS=Homo sapiens GN=PLEC PE=1 SV=3 - [PLEC\_HUMAN]  
 P18206 Vinculin OS=Homo sapiens GN=VCL PE=1 SV=4 - [VINC\_HUMAN]  
 P48723 Heat shock 70 kDa protein 13 OS=Homo sapiens GN=HSPA13 PE=1 SV=1 - [HSP13\_HUMAN]  
 Q9P2D3 HEAT repeat-containing protein 5B OS=Homo sapiens GN=HEATR5B PE=1 SV=2 - [HTR5B\_HUMAN]  
 Q7L2E3 Putative ATP-dependent RNA helicase DHX30 OS=Homo sapiens GN=DHX30 PE=1 SV=1 - [DHX30\_HUMAN]  
 P07384 Calpain-1 catalytic subunit OS=Homo sapiens GN=CAPN1 PE=1 SV=1 - [CAN1\_HUMAN]  
 Q43399 Tumor protein D54 OS=Homo sapiens GN=TPD52L2 PE=1 SV=2 - [TPD54\_HUMAN]  
 P53634 Dipeptidyl peptidase 1 OS=Homo sapiens GN=CTSC PE=1 SV=2 - [CATC\_HUMAN]  
 Q60716 Catenin delta-1 OS=Homo sapiens GN=CTNND1 PE=1 SV=1 - [CTND1\_HUMAN]  
 Q96HE7 ERO1-like protein alpha OS=Homo sapiens GN=ERO1L PE=1 SV=2 - [ERO1A\_HUMAN]  
 P67936 Tropomyosin alpha-4 chain OS=Homo sapiens GN=TPM4 PE=1 SV=3 - [TPM4\_HUMAN]  
 Q81UF1 COB domain-containing protein 2 OS=Homo sapiens GN=CBWD2 PE=1 SV=1 - [CBWD2\_HUMAN]  
 Q15477 Helicase SKI2W OS=Homo sapiens GN=SKIY2L PE=1 SV=3 - [SKIY2\_HUMAN]  
 Q14137 Ribosome biogenesis protein BOP1 OS=Homo sapiens GN=BOP1 PE=1 SV=2 - [BOP1\_HUMAN]  
 P78368 Casein kinase I isoform gamma-2 OS=Homo sapiens GN=CSNK1G2 PE=1 SV=1 - [KC1G2\_HUMAN]  
 P05556 Integrin beta-1 OS=Homo sapiens GN=ITGB1 PE=1 SV=2 - [ITB1\_HUMAN]  
 Q969Q5 Ras-related protein Rab-24 OS=Homo sapiens GN=RAB24 PE=1 SV=1 - [RAB24\_HUMAN]  
 Q9NQW7 Xaa-Pro aminopeptidase 1 OS=Homo sapiens GN=XPNPEP1 PE=1 SV=3 - [XPP1\_HUMAN]  
 Q81Y16 Exocyst complex component 8 OS=Homo sapiens GN=EXOC8 PE=1 SV=2 - [EXOC8\_HUMAN]  
 Q9H9E3 Conserved oligomeric Golgi complex subunit 4 OS=Homo sapiens GN=COG4 PE=1 SV=3 - [COG4\_HUMAN]  
 Q9NY12 H/ACA ribonucleoprotein complex subunit 1 OS=Homo sapiens GN=GARI PE=1 SV=1 - [GARI\_HUMAN]  
 Q15102 Platelet-activating factor acetylhydrolase 1B subunit gamma OS=Homo sapiens GN=PAFAH1B3 PE=1 SV=1 - [PA1B3\_HUMAN]  
 Q94979 Protein transport protein Sec31A OS=Homo sapiens GN=SEC31A PE=1 SV=3 - [SC31A\_HUMAN]  
 Q01970 1-phosphatidylinositol 4,5-bisphosphate phosphodiesterase beta-3 OS=Homo sapiens GN=PLCB3 PE=1 SV=2 - [PLCB3\_HUMAN]  
 Q15691 Microtubule-associated protein RP/EB family member 1 OS=Homo sapiens GN=MAPRE1 PE=1 SV=3 - [MARE1\_HUMAN]  
 Q9BT70 Acidic leucine-rich nuclear phosphoprotein 32 family member E OS=Homo sapiens GN=ANP32E PE=1 SV=1 - [AN32E\_HUMAN]  
 Q43657 Tetraspanin-6 OS=Homo sapiens GN=TSPAN6 PE=1 SV=1 - [TSN6\_HUMAN]  
 P61011 Signal recognition particle 54 kDa protein OS=Homo sapiens GN=SRP54 PE=1 SV=1 - [SRP54\_HUMAN]  
 P98095 Fibulin-2 OS=Homo sapiens GN=FBLN2 PE=1 SV=2 - [FBLN2\_HUMAN]  
 Q04837 Single-stranded DNA-binding protein, mitochondrial OS=Homo sapiens GN=SSBP1 PE=1 SV=1 - [SSBP\_HUMAN]  
 Q9HTX7 Intraflagellar transport protein 22 homolog OS=Homo sapiens GN=IFT22 PE=2 SV=1 - [IFT22\_HUMAN]  
 Q9UI30 Multifunctional methyltransferase subunit TRM112-like protein OS=Homo sapiens GN=TRMT112 PE=1 SV=1 - [TR112\_HUMAN]  
 P10301 Ras-related protein R-Ras OS=Homo sapiens GN=RRAS PE=1 SV=1 - [RRAS\_HUMAN]  
 O14972 Down syndrome critical region protein 3 OS=Homo sapiens GN=DSCR3 PE=2 SV=1 - [DSCR3\_HUMAN]  
 P53677 AP-3 complex subunit mu-2 OS=Homo sapiens GN=AP3M2 PE=2 SV=1 - [AP3M2\_HUMAN]  
 Q96555 ATPase WRNIP1 OS=Homo sapiens GN=WRNIP1 PE=1 SV=2 - [WRIP1\_HUMAN]  
 P43243 Matrin-3 OS=Homo sapiens GN=MATR3 PE=1 SV=2 - [MATR3\_HUMAN]  
 Q9NUQ8 ATP-binding cassette sub-family F member 3 OS=Homo sapiens GN=ABCF3 PE=1 SV=2 - [ABCF3\_HUMAN]  
 P09972 Fructose-bisphosphate aldolase C OS=Homo sapiens GN=ALDOC PE=1 SV=2 - [ALDOC\_HUMAN]  
 Q8N6T3 ADP-ribosylation factor GTPase-activating protein 1 OS=Homo sapiens GN=ARFGAP1 PE=1 SV=2 - [ARFG1\_HUMAN]  
 Q43815 Striatin OS=Homo sapiens GN=STRN PE=1 SV=4 - [STRN\_HUMAN]  
 Q9BTY2 Plasma alpha-L-fucosidase OS=Homo sapiens GN=FUCA2 PE=1 SV=2 - [FUCO2\_HUMAN]  
 C4AMC7 Putative WAS protein family homolog 3 OS=Homo sapiens GN=WASH3P PE=1 SV=2 - [WASH3\_HUMAN]  
 Q92990 Glomulin OS=Homo sapiens GN=GLMN PE=1 SV=2 - [GLMN\_HUMAN]  
 P63272 Transcription elongation factor SPT4 OS=Homo sapiens GN=SPT4H1 PE=1 SV=1 - [SPT4H\_HUMAN]  
 Q9UKL0 REST corepressor 1 OS=Homo sapiens GN=RCOR1 PE=1 SV=1 - [RCOR1\_HUMAN]  
 P02647 Apolipoprotein A-I OS=Homo sapiens GN=APOA1 PE=1 SV=1 - [APOA1\_HUMAN]  
 Q6STE5 SWI/SNF-related matrix-associated actin-dependent regulator of chromatin subfamily D member 3 OS=Homo sapiens GN=SMARCD3 PE=1 SV=1 - [SMRD3\_HUMAN]  
 Q29RF7 Sister chromatid cohesion protein PDS5 homolog A OS=Homo sapiens GN=PDS5A PE=1 SV=1 - [PDS5A\_HUMAN]  
 Q9UKY7 Protein CDV3 homolog OS=Homo sapiens GN=CDV3 PE=1 SV=1 - [CDV3\_HUMAN]  
 Q95433 Activator of 90 kDa heat shock protein ATPase homolog 1 OS=Homo sapiens GN=AHSA1 PE=1 SV=1 - [AHSA1\_HUMAN]  
 P35613 Basigin OS=Homo sapiens GN=BSG PE=1 SV=2 - [BASI\_HUMAN]  
 Q12805 EGF-containing fibulin-like extracellular matrix protein 1 OS=Homo sapiens GN=EFEMP1 PE=1 SV=2 - [FBLN3\_HUMAN]  
 Q9B38 WD repeat-containing protein 18 OS=Homo sapiens GN=WDR18 PE=1 SV=2 - [WDR18\_HUMAN]  
 P32121 Beta-arrestin-2 OS=Homo sapiens GN=ARRB2 PE=1 SV=2 - [ARRB2\_HUMAN]  
 Q9NQS1 Cell death regulator Aven OS=Homo sapiens GN=AVEN PE=1 SV=1 - [AVEN\_HUMAN]  
 P53041 Serine/threonine-protein phosphatase 5 OS=Homo sapiens GN=PPP5C PE=1 SV=1 - [PPP5\_HUMAN]  
 P01034 Cystatin-C OS=Homo sapiens GN=CST3 PE=1 SV=1 - [CYTC\_HUMAN]  
 Q12840 Kinesin heavy chain isoform 5A OS=Homo sapiens GN=KIF5A PE=1 SV=2 - [KIF5A\_HUMAN]  
 Q96GD4 Aurora kinase B OS=Homo sapiens GN=AURKB PE=1 SV=3 - [AURKB\_HUMAN]  
 A4D1P6 WD repeat-containing protein 91 OS=Homo sapiens GN=WDR91 PE=1 SV=2 - [WDR91\_HUMAN]  
 Q96QR8 Transcriptional activator protein Pur-beta OS=Homo sapiens GN=PURB PE=1 SV=3 - [PURB\_HUMAN]  
 Q9BTE7 DCN1-like protein 5 OS=Homo sapiens GN=DCN1D5 PE=1 SV=1 - [DCN15\_HUMAN]  
 Q9NVM9 Protein asunder homolog OS=Homo sapiens GN=ASUN PE=1 SV=2 - [ASUN\_HUMAN]  
 P42858 Huntingtin OS=Homo sapiens GN=HTT PE=1 SV=2 - [HD\_HUMAN]  
 P21926 CD9 antigen OS=Homo sapiens GN=CD9 PE=1 SV=4 - [CD9\_HUMAN]  
 Q9H9C7 Protein argonaute-3 OS=Homo sapiens GN=AGO3 PE=1 SV=2 - [AGO3\_HUMAN]  
 Q06787 Fragile X mental retardation protein 1 OS=Homo sapiens GN=FMR1 PE=1 SV=1 - [FMR1\_HUMAN]  
 Q96FW1 Ubiquitin thioesterase OTUB1 OS=Homo sapiens GN=OTUB1 PE=1 SV=2 - [OTUB1\_HUMAN]  
 Q94966 Ubiquitin carboxyl-terminal hydrolase 19 OS=Homo sapiens GN=USP19 PE=1 SV=2 - [UBP19\_HUMAN]  
 P98179 RNA-binding protein 3 OS=Homo sapiens GN=RBM3 PE=1 SV=1 - [RBM3\_HUMAN]

Q96HY6 DDRGK domain-containing protein 1 OS=Homo sapiens GN=DDRK1 PE=1 SV=2 - [DDRK\_HUMAN]  
Q9UJC3 Protein hook homolog 1 OS=Homo sapiens GN=HOOK1 PE=1 SV=2 - [HOOK1\_HUMAN]  
P52594 Arf-GAP domain and FG repeat-containing protein 1 OS=Homo sapiens GN=AGFG1 PE=1 SV=2 - [AGFG1\_HUMAN]  
Q9NRL3 Striatin-4 OS=Homo sapiens GN=STRN4 PE=1 SV=2 - [STRN4\_HUMAN]  
P99999 Cytochrome c OS=Homo sapiens GN=CYCS PE=1 SV=2 - [CYC\_HUMAN]  
Q96S44 TP53-regulating kinase OS=Homo sapiens GN=TP53RK PE=1 SV=2 - [PRPK\_HUMAN]  
Q99707 Methionine synthase OS=Homo sapiens GN=MTR PE=1 SV=2 - [METH\_HUMAN]  
P50914 60S ribosomal protein L14 OS=Homo sapiens GN=RPL14 PE=1 SV=4 - [R14\_HUMAN]  
Q9B14 Nucleolar complex protein 4 homolog OS=Homo sapiens GN=NOC4L PE=1 SV=1 - [NOC4L\_HUMAN]  
P51570 Galactokinase OS=Homo sapiens GN=GALK1 PE=1 SV=1 - [GALK1\_HUMAN]  
Q75197 Low-density lipoprotein receptor-related protein 5 OS=Homo sapiens GN=LRP5 PE=1 SV=2 - [LRP5\_HUMAN]  
Q02750 Dual specificity mitogen-activated protein kinase kinase 1 OS=Homo sapiens GN=MAP2K1 PE=1 SV=2 - [MP2K1\_HUMAN]  
Q95631 Netrin-1 OS=Homo sapiens GN=NTN1 PE=1 SV=2 - [NET1\_HUMAN]  
P78344 Eukaryotic translation initiation factor 4 gamma 2 OS=Homo sapiens GN=EIF4G2 PE=1 SV=1 - [IF4G2\_HUMAN]  
P16278 Beta-galactosidase OS=Homo sapiens GN=GLB1 PE=1 SV=2 - [BGAL\_HUMAN]  
P62995 Transformer-2 protein homolog beta OS=Homo sapiens GN=TRA2B PE=1 SV=1 - [TRA2B\_HUMAN]  
Q6P9B6 TLD domain-containing protein 1 OS=Homo sapiens GN=TLDC1 PE=1 SV=2 - [TLDC1\_HUMAN]  
Q9Y613 Epsin-1 OS=Homo sapiens GN=EPN1 PE=1 SV=2 - [EPN1\_HUMAN]  
P08621 U1 small nuclear ribonucleoprotein 70 kDa OS=Homo sapiens GN=SNRNP70 PE=1 SV=2 - [RU17\_HUMAN]  
Q7L273 BTB/POZ domain-containing protein KCTD9 OS=Homo sapiens GN=KCTD9 PE=1 SV=1 - [KCTD9\_HUMAN]  
Q9Y6D6 Brefeldin A-inhibited guanine nucleotide-exchange protein 1 OS=Homo sapiens GN=ARFGEF1 PE=1 SV=2 - [BIG1\_HUMAN]  
P28676 Grancalcin OS=Homo sapiens GN=GCA PE=1 SV=2 - [GRAN\_HUMAN]  
Q562R1 Beta-actin-like protein 2 OS=Homo sapiens GN=ACTBL2 PE=1 SV=2 - [ACTBL\_HUMAN]  
Q8NG11 Tetraspanin-14 OS=Homo sapiens GN=TSPAN14 PE=1 SV=1 - [TSN14\_HUMAN]  
Q9P2W1 Homologous-pairing protein 2 homolog OS=Homo sapiens GN=PSMC3IP PE=1 SV=1 - [HOP2\_HUMAN]  
Q9H2U1 ATP-dependent RNA helicase DHX36 OS=Homo sapiens GN=DHX36 PE=1 SV=2 - [DHX36\_HUMAN]  
Q92888 Rho guanine nucleotide exchange factor 1 OS=Homo sapiens GN=ARHGEF1 PE=1 SV=2 - [ARHG1\_HUMAN]  
Q9BQT9 Calsyntenin-3 OS=Homo sapiens GN=CLSTN3 PE=1 SV=1 - [CLSTN3\_HUMAN]  
Q9UFC0 Leucine-rich repeat and WD repeat-containing protein 1 OS=Homo sapiens GN=LWRD1 PE=1 SV=2 - [LWRD1\_HUMAN]  
Q00584 Ribonuclease T2 OS=Homo sapiens GN=RNAS2 PE=1 SV=2 - [RNT2\_HUMAN]  
P07948 Tyrosine-protein kinase Lyn OS=Homo sapiens GN=LYN PE=1 SV=3 - [LYN\_HUMAN]  
Q43592 Exportin-T OS=Homo sapiens GN=XPO1 PE=1 SV=2 - [XPOT\_HUMAN]  
P51116 Fragile X mental retardation syndrome-related protein 2 OS=Homo sapiens GN=FXR2 PE=1 SV=2 - [FXR2\_HUMAN]  
Q9B86 N-terminal Xaa-Pro-Lys-N-methyltransferase 1 OS=Homo sapiens GN=NTMT1 PE=1 SV=3 - [NTM1A\_HUMAN]  
Q9BUR4 Telomerase Cajal body protein 1 OS=Homo sapiens GN=WRAP53 PE=1 SV=1 - [WAP53\_HUMAN]  
Q95232 Luc7-like protein 3 OS=Homo sapiens GN=LUC7L3 PE=1 SV=2 - [LC7L3\_HUMAN]  
Q9BWF3 RNA-binding protein 4 OS=Homo sapiens GN=RBM4 PE=1 SV=1 - [RBM4\_HUMAN]  
P42704 Leucine-rich PPR motif-containing protein, mitochondrial OS=Homo sapiens GN=LPPRC PE=1 SV=3 - [LPPRC\_HUMAN]  
Q86223 Complement C1q-like protein 4 OS=Homo sapiens GN=C1QL4 PE=2 SV=1 - [C1QL4\_HUMAN]  
Q8NC51 Plasminogen activator inhibitor 1 RNA-binding protein OS=Homo sapiens GN=SERBP1 PE=1 SV=2 - [PAIRB\_HUMAN]  
Q92542 Nicotinic OS=Homo sapiens GN=NCSN PE=1 SV=2 - [NIC\_A\_HUMAN]  
Q9UNN8 Endothelial protein C receptor OS=Homo sapiens GN=PROC1R PE=1 SV=1 - [EPCR\_HUMAN]  
Q9UHX1 Poly(U)-binding-splicing factor PUF60 OS=Homo sapiens GN=PUF60 PE=1 SV=1 - [PUF60\_HUMAN]  
Q92882 Osteoclast-stimulating factor 1 OS=Homo sapiens GN=OSTF1 PE=1 SV=2 - [OSTF1\_HUMAN]  
Q9Y625 Glypican-6 OS=Homo sapiens GN=GPC6 PE=1 SV=1 - [GPC6\_HUMAN]  
A3K8N3 Protein strawberry notch homolog 1 OS=Homo sapiens GN=SBNO1 PE=1 SV=1 - [SBNO1\_HUMAN]  
P52298 Nuclear cap-binding protein subunit 2 OS=Homo sapiens GN=NCBP2 PE=1 SV=1 - [NCBP2\_HUMAN]  
O15067 Phosphoribosylformylglycinamide synthase OS=Homo sapiens GN=PFAS PE=1 SV=4 - [PUR4\_HUMAN]  
P57772 Selenocysteine-specific elongation factor OS=Homo sapiens GN=EEFSEC PE=1 SV=4 - [SELB\_HUMAN]  
Q86VN1 Vacuolar protein-sorting-associated protein 36 OS=Homo sapiens GN=VPS36 PE=1 SV=1 - [VPS36\_HUMAN]  
Q969U7 Proteasome assembly chaperone 2 OS=Homo sapiens GN=PSMG2 PE=1 SV=1 - [PSMG2\_HUMAN]  
Q15750 TGF-beta-activated kinase 1 and MAP3K7-binding protein 1 OS=Homo sapiens GN=TAB1 PE=1 SV=1 - [TAB1\_HUMAN]  
Q75530 Polycomb protein EED OS=Homo sapiens GN=EED PE=1 SV=2 - [EED\_HUMAN]  
Q95858 Tetraspanin-15 OS=Homo sapiens GN=TSPAN15 PE=1 SV=1 - [TSN15\_HUMAN]  
Q94808 Glutamine-fructose-6-phosphate aminotransferase [isomerizing] 2 OS=Homo sapiens GN=GFPT2 PE=1 SV=3 - [GFPT2\_HUMAN]  
P23381 Tryptophan--tRNA ligase, cytoplasmic OS=Homo sapiens GN=WARS PE=1 SV=2 - [SYWC\_HUMAN]  
Q81UX4 DNA dc->du-editing enzyme APOBEC3F OS=Homo sapiens GN=APOBEC3F PE=1 SV=3 - [ABC3F\_HUMAN]  
Q9Y2P8 RNA 3'-terminal phosphate cyclase-like protein OS=Homo sapiens GN=RCL1 PE=1 SV=3 - [RCL1\_HUMAN]  
P62861 40S ribosomal protein S30 OS=Homo sapiens GN=FAU PE=1 SV=1 - [RS30\_HUMAN]  
Q95373 Importin-7 OS=Homo sapiens GN=IP07 PE=1 SV=1 - [IP07\_HUMAN]  
Q55RE5 Nucleoporin NUP188 homolog OS=Homo sapiens GN=NUP188 PE=1 SV=1 - [NUP188\_HUMAN]  
Q9NQ55 Suppressor of SWI4 1 homolog OS=Homo sapiens GN=PPAN PE=1 SV=1 - [SSSF1\_HUMAN]  
Q9U9Q6 Exostosin-like 2 OS=Homo sapiens GN=EXTL2 PE=1 SV=1 - [EXTL2\_HUMAN]  
P49840 Glycogen synthase kinase-3 alpha OS=Homo sapiens GN=GSK3A PE=1 SV=2 - [GSK3A\_HUMAN]  
Q99543 DnaJ homolog subfamily C member 2 OS=Homo sapiens GN=DNAJ2 PE=1 SV=4 - [DNJ2\_HUMAN]  
Q9U9Q8 Brain-specific angiogenesis inhibitor 1-associated protein 2 OS=Homo sapiens GN=BAIAP2 PE=1 SV=1 - [BAIP2\_HUMAN]  
Q43633 Charged multivesicular body protein 2a OS=Homo sapiens GN=CHMP2A PE=1 SV=1 - [CHM2A\_HUMAN]  
P49754 Vacuolar protein sorting-associated protein 41 homolog OS=Homo sapiens GN=VPS41 PE=1 SV=3 - [VPS41\_HUMAN]  
P61966 AP-1 complex subunit sigma-1A OS=Homo sapiens GN=AP1S1 PE=1 SV=1 - [AP1S1\_HUMAN]  
Q14517 Protocadherin Fat 1 OS=Homo sapiens GN=FAT1 PE=1 SV=2 - [FAT1\_HUMAN]  
Q93099 Homogentisate 1,2-dioxygenase OS=Homo sapiens GN=HGD PE=1 SV=2 - [HGD\_HUMAN]  
Q9NTX5 Ethylmalonyl-CoA decarboxylase OS=Homo sapiens GN=ECHDC1 PE=1 SV=2 - [ECHD1\_HUMAN]  
Q14817 Tetraspanin-4 OS=Homo sapiens GN=TSPAN4 PE=1 SV=1 - [TSN4\_HUMAN]  
P49585 Choline-phosphate cytidylyltransferase A OS=Homo sapiens GN=PCYT1A PE=1 SV=2 - [PCY1A\_HUMAN]  
Q9PON9 TBC1 domain family member 7 OS=Homo sapiens GN=TBC1D7 PE=1 SV=1 - [TBCD7\_HUMAN]  
Q8N3C0 Activating signal co-receptor 1 complex subunit 3 OS=Homo sapiens GN=ASCC3 PE=1 SV=3 - [ASCC3\_HUMAN]  
P57740 Nuclear pore complex protein Nup107 OS=Homo sapiens GN=NUP107 PE=1 SV=1 - [NUP107\_HUMAN]  
Q99871 HAUS augmin-like complex subunit 7 OS=Homo sapiens GN=HAUS7 PE=1 SV=3 - [HAUS7\_HUMAN]  
Q9H0X4 Protein ITFG3 OS=Homo sapiens GN=ITFG3 PE=1 SV=1 - [ITFG3\_HUMAN]  
Q9Y3P9 Rab GTPase-activating protein 1 OS=Homo sapiens GN=RABGAP1 PE=1 SV=3 - [RBGP1\_HUMAN]  
Q96Q15 Serine/threonine-protein kinase SMG1 OS=Homo sapiens GN=SMG1 PE=1 SV=3 - [SMG1\_HUMAN]  
P52209 6-phosphogluconate dehydrogenase, decarboxylating OS=Homo sapiens GN=PGD PE=1 SV=3 - [6PGD\_HUMAN]  
Q95639 Cleavage and polyadenylation specificity factor subunit 4 OS=Homo sapiens GN=CPSF4 PE=1 SV=1 - [CPSF4\_HUMAN]  
P48507 Glutamate--cysteine ligase regulatory subunit OS=Homo sapiens GN=GCLM PE=1 SV=1 - [GSHO\_HUMAN]  
Q9HCC0 Methylcrotonoyl-CoA carboxylase beta chain, mitochondrial OS=Homo sapiens GN=MCCC2 PE=1 SV=1 - [MCCB\_HUMAN]  
Q9UL18 Protein argonaute-1 OS=Homo sapiens GN=AGO1 PE=1 SV=3 - [AGO1\_HUMAN]  
Q6P158 Putative ATP-dependent RNA helicase DHX57 OS=Homo sapiens GN=DHX57 PE=1 SV=2 - [DHX57\_HUMAN]  
Q9NSB8 Homer protein homolog 2 OS=Homo sapiens GN=HOMER2 PE=1 SV=1 - [HOME2\_HUMAN]  
P49821 NADH dehydrogenase [ubiquinone] flavoprotein 1, mitochondrial OS=Homo sapiens GN=NDUFV1 PE=1 SV=4 - [NDUV1\_HUMAN]  
Q43617 Trafficking protein particle complex subunit 3 OS=Homo sapiens GN=TRAPP3 PE=1 SV=1 - [TPPC3\_HUMAN]  
Q94766 Galactosylgalactosylxylosylprotein 3-beta-glucuronosyltransferase 3 OS=Homo sapiens GN=B3GAT3 PE=1 SV=2 - [B3GAT3\_HUMAN]  
Q52LJ0 Protein FAM98B OS=Homo sapiens GN=FAM98B PE=1 SV=1 - [FAM98B\_HUMAN]  
Q6P148 Aspartate--tRNA ligase, mitochondrial OS=Homo sapiens GN=DARS2 PE=1 SV=1 - [SYDM\_HUMAN]  
Q9HCS7 Pre-mRNA-splicing factor SYF1 OS=Homo sapiens GN=XAB2 PE=1 SV=2 - [SYF1\_HUMAN]  
Q96JC1 Vam6/Vps39-like protein OS=Homo sapiens GN=VPS39 PE=1 SV=2 - [VPS39\_HUMAN]  
P35222 Catenin beta-1 OS=Homo sapiens GN=CTNBB1 PE=1 SV=1 - [CTNB1\_HUMAN]  
P48426 Phosphatidylinositol 5-phosphate 4-kinase type-2 alpha OS=Homo sapiens GN=P1P4K2A PE=1 SV=2 - [PI42A\_HUMAN]  
Q04637 Eukaryotic translation initiation factor 4 gamma 1 OS=Homo sapiens GN=EIF4G1 PE=1 SV=4 - [IF4G1\_HUMAN]  
Q8TBX8 Phosphatidylinositol 5-phosphate 4-kinase type-2 gamma OS=Homo sapiens GN=P1P4K2C PE=1 SV=3 - [PI42C\_HUMAN]  
P53675 Clathrin heavy chain 2 OS=Homo sapiens GN=CLTCL1 PE=1 SV=2 - [CLH2\_HUMAN]  
Q9HTB2 Ribosome production factor 2 homolog OS=Homo sapiens GN=RPF2 PE=1 SV=2 - [RPF2\_HUMAN]  
Q12789 General transcription factor 3C polypeptide 1 OS=Homo sapiens GN=TF3C1 PE=1 SV=4 - [TF3C1\_HUMAN]  
P57081 tRNA (guanine-N(7)-)methyltransferase non-catalytic subunit WDR4 OS=Homo sapiens GN=WDR4 PE=1 SV=2 - [WDR4\_HUMAN]  
P50750 Cyclin-dependent kinase 9 OS=Homo sapiens GN=CDK9 PE=1 SV=3 - [CDK9\_HUMAN]  
P48960 CD97 antigen OS=Homo sapiens GN=CD97 PE=1 SV=4 - [CD97\_HUMAN]  
Q99729 Heterogeneous nuclear ribonucleoprotein A/B OS=Homo sapiens GN=HNRNPAB PE=1 SV=2 - [ROAA\_HUMAN]  
P22695 Cytochrome b-c1 complex subunit 2, mitochondrial OS=Homo sapiens GN=UQCRC2 PE=1 SV=3 - [QCR2\_HUMAN]  
P60510 Serine/threonine-protein phosphatase 4 catalytic subunit OS=Homo sapiens GN=PPP4C PE=1 SV=1 - [PP4C\_HUMAN]  
Q9Y6M1 Insulin-like growth factor 2 mRNA-binding protein 2 OS=Homo sapiens GN=IGFBP2 PE=1 SV=2 - [IF2B2\_HUMAN]  
P09012 U1 small nuclear ribonucleoprotein A OS=Homo sapiens GN=SNRPA PE=1 SV=3 - [SNRPA\_HUMAN]  
Q60645 Exocyst complex component 3 OS=Homo sapiens GN=EXOC3 PE=1 SV=2 - [EXOC3\_HUMAN]  
Q8NEB9 Phosphatidylinositol 3-kinase catalytic subunit type 3 OS=Homo sapiens GN=PIK3C3 PE=1 SV=1 - [PK3C3\_HUMAN]  
Q00469 Procollagen-lysine,2-oxoglutarate 5-dioxygenase 2 OS=Homo sapiens GN=PLOD2 PE=1 SV=2 - [PLOD2\_HUMAN]  
Q96GA3 Protein LTV1 homolog OS=Homo sapiens GN=LTV1 PE=1 SV=1 - [LTV1\_HUMAN]  
Q9NRG9 Aladin OS=Homo sapiens GN=AAAS PE=1 SV=1 - [AAAS\_HUMAN]



Q9P1F3 Costars family protein ABRACL OS=Homo sapiens GN=ABRACL PE=1 SV=1 - [ABRAL\_HUMAN]  
Q92878 DNA repair protein RAD50 OS=Homo sapiens GN=RAD50 PE=1 SV=1 - [RAD50\_HUMAN]  
Q6PK60 La-related protein 1 OS=Homo sapiens GN=LARP1 PE=1 SV=2 - [LARP1\_HUMAN]  
Q9UH09 Ubiquitin-2 OS=Homo sapiens GN=UBQLN2 PE=1 SV=2 - [UBQL2\_HUMAN]  
P45974 Ubiquitin carboxyl-terminal hydrolase 5 OS=Homo sapiens GN=USP5 PE=1 SV=2 - [UBP5\_HUMAN]  
Q5H9R7 Serine/threonine-protein phosphatase 6 regulatory subunit 3 OS=Homo sapiens GN=PPP6R3 PE=1 SV=2 - [PP6R3\_HUMAN]  
P02795 Metallothionein-2 OS=Homo sapiens GN=MT2A PE=1 SV=1 - [MT2\_HUMAN]  
Q8NOX7 Spartoin OS=Homo sapiens GN=SPG20 PE=1 SV=1 - [SPG20\_HUMAN]  
P13674 Prolyl 4-hydroxylase subunit alpha-1 OS=Homo sapiens GN=P4HA1 PE=1 SV=2 - [P4HA1\_HUMAN]  
Q9H0L4 Cleavage stimulation factor subunit 2 tau variant OS=Homo sapiens GN=CSTF2T PE=1 SV=1 - [CSTFT\_HUMAN]  
Q9Y383 Putative RNA-binding protein Luc7-like 2 OS=Homo sapiens GN=LUC7L2 PE=1 SV=2 - [LUC7L2\_HUMAN]  
B9A064 Immunoglobulin lambda-like polypeptide 5 OS=Homo sapiens GN=IGLL5 PE=2 SV=2 - [IGLL5\_HUMAN]  
P55084 Trifunctional enzyme subunit beta, mitochondrial OS=Homo sapiens GN=HADHB PE=1 SV=3 - [ECHB\_HUMAN]  
P51610 Host cell factor 1 OS=Homo sapiens GN=HCFC1 PE=1 SV=2 - [HCFC1\_HUMAN]  
P62891 60S ribosomal protein L39 OS=Homo sapiens GN=RPL39 PE=1 SV=2 - [RL39\_HUMAN]  
P23193 Transcription elongation factor A protein 1 OS=Homo sapiens GN=TCEA1 PE=1 SV=2 - [TCEA1\_HUMAN]  
Q06265 Exosome complex component RRP45 OS=Homo sapiens GN=EXOSC9 PE=1 SV=3 - [EXOS9\_HUMAN]  
Q08629 Testican-1 OS=Homo sapiens GN=SPOCK1 PE=1 SV=1 - [TICN1\_HUMAN]  
Q9NT15 Sister chromatid cohesion protein PDS5 homolog B OS=Homo sapiens GN=PDS5B PE=1 SV=1 - [PDS5B\_HUMAN]  
Q14694 Ubiquitin carboxyl-terminal hydrolase 10 OS=Homo sapiens GN=USP10 PE=1 SV=2 - [UBP10\_HUMAN]  
Q965B4 SRSF protein kinase 1 OS=Homo sapiens GN=SRPK1 PE=1 SV=2 - [SRPK1\_HUMAN]  
Q9UJF9 CCR4-NOT transcription complex subunit 8 OS=Homo sapiens GN=CNOT8 PE=1 SV=1 - [CNOT8\_HUMAN]  
Q96DH6 RNA-binding protein Musashi homolog 2 OS=Homo sapiens GN=MSI2 PE=1 SV=1 - [MSI2H\_HUMAN]  
P11177 Pyruvate dehydrogenase E1 component subunit beta, mitochondrial OS=Homo sapiens GN=PDHB PE=1 SV=3 - [ODPB\_HUMAN]  
P29992 Guanine nucleotide-binding protein subunit alpha-11 OS=Homo sapiens GN=GNA11 PE=1 SV=2 - [GNA11\_HUMAN]  
Q96751 RUN and FIVE domain-containing protein 1 OS=Homo sapiens GN=RUFY1 PE=1 SV=2 - [RUFY1\_HUMAN]  
Q8W9V9 AN1-type zinc finger protein 2B OS=Homo sapiens GN=ZFAND2B PE=1 SV=1 - [ZFN2B\_HUMAN]  
P78310 Coxsackievirus and adenovirus receptor OS=Homo sapiens GN=CXADR PE=1 SV=1 - [CXAR\_HUMAN]  
Q7L9L4 MOB kinase activator 1B OS=Homo sapiens GN=MOB1B PE=1 SV=3 - [MOB1B\_HUMAN]  
P49189 4-trimethylaminobutyraldehyde dehydrogenase OS=Homo sapiens GN=ALDH9A1 PE=1 SV=3 - [AL9A1\_HUMAN]  
Q75964 ATP synthase subunit g, mitochondrial OS=Homo sapiens GN=ATP5L PE=1 SV=3 - [ATP5L\_HUMAN]  
P30043 Flavin reductase (NADPH) OS=Homo sapiens GN=BLVRB PE=1 SV=3 - [BLVRB\_HUMAN]  
Q43252 Bifunctional 3'-phosphoadenosine 5'-phosphosulfate synthase 1 OS=Homo sapiens GN=PAPSS1 PE=1 SV=2 - [PAPSI\_HUMAN]  
P21283 V-type proton ATPase subunit C 1 OS=Homo sapiens GN=ATP6V1C1 PE=1 SV=4 - [VATC1\_HUMAN]  
Q14839 Chromodomain-helicase-DNA-binding protein 4 OS=Homo sapiens GN=CHD4 PE=1 SV=2 - [CHD4\_HUMAN]  
Q5VW36 Focadhesin OS=Homo sapiens GN=FOCAD PE=1 SV=1 - [FOCAD\_HUMAN]  
Q60749 Sorting nexin-2 OS=Homo sapiens GN=SNX2 PE=1 SV=2 - [SNX2\_HUMAN]  
P28838 Eukaryotic aminopeptidase OS=Homo sapiens GN=LAP3 PE=1 SV=3 - [AMPL\_HUMAN]  
P55010 Eukaryotic translation initiation factor 5 OS=Homo sapiens GN=EIF5 PE=1 SV=2 - [IF5\_HUMAN]  
Q8TF46 DIS3-like exonuclease 1 OS=Homo sapiens GN=DIS3L PE=1 SV=2 - [DI3L1\_HUMAN]  
Q72406 Myosin-14 OS=Homo sapiens GN=MYH14 PE=1 SV=2 - [MYH14\_HUMAN]  
Q13444 Disintegrin and metalloproteinase domain-containing protein 15 OS=Homo sapiens GN=ADAM15 PE=1 SV=4 - [ADA15\_HUMAN]  
Q9Y6M4 Casein kinase I isoform gamma-3 OS=Homo sapiens GN=CSNK1G3 PE=1 SV=2 - [KC1G3\_HUMAN]  
P43121 Cell surface glycoprotein MUC18 OS=Homo sapiens GN=MCAI PE=1 SV=2 - [MUC18\_HUMAN]  
Q95390 Growth/differentiation factor 11 OS=Homo sapiens GN=GDF11 PE=2 SV=1 - [GDF11\_HUMAN]  
Q95861 3' (2'),5'-bisphosphate nucleotidase 1 OS=Homo sapiens GN=BPNT1 PE=1 SV=1 - [BPNT1\_HUMAN]  
Q8WX92 Negative elongation factor B OS=Homo sapiens GN=NELFB PE=1 SV=1 - [NELFB\_HUMAN]  
Q15404 Ras suppressor protein 1 OS=Homo sapiens GN=RSU1 PE=1 SV=3 - [RSU1\_HUMAN]  
Q9Y535 DNA-directed RNA polymerase III subunit RPC8 OS=Homo sapiens GN=POLR3H PE=1 SV=1 - [RPC8\_HUMAN]  
Q96KR1 Zinc finger RNA-binding protein OS=Homo sapiens GN=ZFR PE=1 SV=2 - [ZFR\_HUMAN]  
Q86X52 Chondroitin sulfate synthase 1 OS=Homo sapiens GN=CHSY1 PE=1 SV=3 - [CHSS1\_HUMAN]  
Q9BQ70 Transcription factor 25 OS=Homo sapiens GN=TCF25 PE=1 SV=1 - [TCF25\_HUMAN]  
Q00273 DNA fragmentation factor subunit alpha OS=Homo sapiens GN=DFFA PE=1 SV=1 - [DFFA\_HUMAN]  
Q8N136 WD repeat-containing protein 36 OS=Homo sapiens GN=WDR36 PE=1 SV=1 - [WDR36\_HUMAN]  
Q96SI4 Oxyester-binding protein-related protein 9 OS=Homo sapiens GN=OSBPL9 PE=1 SV=2 - [OSBL9\_HUMAN]  
Q15514 DNA-directed RNA polymerase II subunit RPB4 OS=Homo sapiens GN=POLR2D PE=1 SV=1 - [RPB4\_HUMAN]  
P30566 Adenylosuccinate lyase OS=Homo sapiens GN=ADSL PE=1 SV=2 - [PUR8\_HUMAN]  
Q9NUS5 AP-5 complex subunit sigma-1 OS=Homo sapiens GN=AP5S1 PE=1 SV=1 - [AP5S1\_HUMAN]  
Q94855 Protein transport protein Sec24D OS=Homo sapiens GN=SEC24D PE=1 SV=2 - [SC24D\_HUMAN]  
Q00154 Cytosolic acyl coenzyme A thioester hydrolase OS=Homo sapiens GN=ACOT7 PE=1 SV=3 - [BACH\_HUMAN]  
P31947 14-3-3 protein sigma OS=Homo sapiens GN=SFN PE=1 SV=1 - [1433S\_HUMAN]  
Q14008 Cytoskeleton-associated protein 5 OS=Homo sapiens GN=CKAP5 PE=1 SV=3 - [CKAP5\_HUMAN]  
Q6ZVM7 TOM1-like protein 2 OS=Homo sapiens GN=TOM1L2 PE=1 SV=1 - [TM1L2\_HUMAN]  
Q9Y617 Phosphoserine aminotransferase OS=Homo sapiens GN=PSAT1 PE=1 SV=2 - [SERC\_HUMAN]  
Q09328 Alpha-1,6-mannosylglycosyltransferase 6-beta-N-acetylglucosaminyltransferase A OS=Homo sapiens GN=MGAT5 PE=2 SV=1 - [MGT5A\_HUMAN]  
Q06481 Amyloid-like protein 2 OS=Homo sapiens GN=APLP2 PE=1 SV=2 - [APLP2\_HUMAN]  
Q6RW13 Type-1 angiotensin II receptor-associated protein OS=Homo sapiens GN=AGTRAP PE=1 SV=1 - [ATRAP\_HUMAN]  
P51617 Interleukin-1 receptor-associated kinase 1 OS=Homo sapiens GN=IRAK1 PE=1 SV=2 - [IRAK1\_HUMAN]  
Q9H773 dCTP pyrophosphatase 1 OS=Homo sapiens GN=DCTPP1 PE=1 SV=1 - [DCTP1\_HUMAN]  
Q9NRR5 Ubiquitin-4 OS=Homo sapiens GN=UBQLN4 PE=1 SV=2 - [UBQL4\_HUMAN]  
Q13595 Transformer-2 protein homolog alpha OS=Homo sapiens GN=TRA2A PE=1 SV=1 - [TRA2A\_HUMAN]  
Q66K74 Microtubule-associated protein 1S OS=Homo sapiens GN=MAP1S PE=1 SV=2 - [MAP1S\_HUMAN]  
Q8N999 Uncharacterized protein C12orf29 OS=Homo sapiens GN=C12orf29 PE=1 SV=2 - [CLO29\_HUMAN]  
P10646 Tissue factor pathway inhibitor OS=Homo sapiens GN=TFPI PE=1 SV=1 - [TFPI1\_HUMAN]  
P20340 Ras-related protein Rab-6A OS=Homo sapiens GN=RAB6A PE=1 SV=3 - [RAB6A\_HUMAN]  
Q15428 Splicing factor 3A subunit 2 OS=Homo sapiens GN=SF3A2 PE=1 SV=2 - [SF3A2\_HUMAN]  
Q9Y263 Phospholipase A-2-activating protein OS=Homo sapiens GN=PLAA PE=1 SV=2 - [PLAP\_HUMAN]  
P35611 Alpha-adducin OS=Homo sapiens GN=ADD1 PE=1 SV=2 - [ADDA\_HUMAN]  
Q81UF8 Bifunctional lysine-specific demethylase and histidyl-hydroxylase MINA OS=Homo sapiens GN=MINA PE=1 SV=1 - [MINA\_HUMAN]  
Q9ULK4 Mediator of RNA polymerase II transcription subunit 23 OS=Homo sapiens GN=MED23 PE=1 SV=2 - [MED23\_HUMAN]  
Q56706 Coiled-coil domain-containing protein 93 OS=Homo sapiens GN=CCDC93 PE=1 SV=2 - [CCD93\_HUMAN]  
Q9B2M5 NKG2D ligand 2 OS=Homo sapiens GN=ULBP2 PE=1 SV=1 - [N2DL2\_HUMAN]  
Q04206 Transcription factor p65 OS=Homo sapiens GN=RELA PE=1 SV=2 - [TF65\_HUMAN]  
Q9H0S4 Probable ATP-dependent RNA helicase DDX47 OS=Homo sapiens GN=DDX47 PE=1 SV=1 - [DDX47\_HUMAN]  
Q81VV7 Glucose-induced degradation protein 4 homolog OS=Homo sapiens GN=GID4 PE=2 SV=1 - [GID4\_HUMAN]  
Q8TC07 TBC1 domain family member 15 OS=Homo sapiens GN=TBC1D15 PE=1 SV=2 - [TBC15\_HUMAN]  
Q9BQ60 Myb-binding protein 1A OS=Homo sapiens GN=MYBBP1A PE=1 SV=2 - [MBB1A\_HUMAN]  
Q95486 Protein transport protein Sec24A OS=Homo sapiens GN=SEC24A PE=1 SV=2 - [SC24A\_HUMAN]  
Q8WUA4 General transcription factor 3C polypeptide 2 OS=Homo sapiens GN=GTF3C2 PE=1 SV=2 - [TF3C2\_HUMAN]  
Q9UJBB6 Neurochondrin OS=Homo sapiens GN=NCDN PE=1 SV=1 - [NCDN\_HUMAN]  
Q9Y6Y8 SEC23-interacting protein OS=Homo sapiens GN=SEC23IP PE=1 SV=1 - [S23IP\_HUMAN]  
Q9UXK7 Nuclear pore complex protein Nup50 OS=Homo sapiens GN=NUP50 PE=1 SV=2 - [NUP50\_HUMAN]  
Q13185 Chromobox protein homolog 3 OS=Homo sapiens GN=CBX3 PE=1 SV=4 - [CBX3\_HUMAN]  
Q9UKF6 Cleavage and polyadenylation specificity factor subunit 3 OS=Homo sapiens GN=CPSF3 PE=1 SV=1 - [CPSF3\_HUMAN]  
Q00541 Pescadillo homolog OS=Homo sapiens GN=PES1 PE=1 SV=1 - [PESC\_HUMAN]  
Q6L9W6 Beta-1,4-N-acetylgalactosaminyltransferase 3 OS=Homo sapiens GN=B4GALNT3 PE=1 SV=2 - [B4GN3\_HUMAN]  
Q60763 General vesicular transport factor p115 OS=Homo sapiens GN=USO1 PE=1 SV=2 - [USO1\_HUMAN]  
Q15269 Periodic tryptophan protein 2 homolog OS=Homo sapiens GN=PWP2 PE=1 SV=2 - [PWP2\_HUMAN]  
Q8N428 Polypeptide N-acetylgalactosaminyltransferase 16 OS=Homo sapiens GN=GALNT16 PE=1 SV=2 - [GLT16\_HUMAN]  
Q12769 Nuclear pore complex protein Nup160 OS=Homo sapiens GN=NUP160 PE=1 SV=3 - [NU160\_HUMAN]  
Q9NRR7 L-aminoadipate-semialdehyde dehydrogenase-phosphopantetheinyl transferase OS=Homo sapiens GN=AADSHPT PE=1 SV=2 - [ADSHPT\_HUMAN]  
P50502 Hsc70-interacting protein OS=Homo sapiens GN=STI3 PE=1 SV=2 - [F10A1\_HUMAN]  
Q96FV9 THO complex subunit 1 OS=Homo sapiens GN=THOC1 PE=1 SV=1 - [THOC1\_HUMAN]  
Q43427 Acidic fibroblast growth factor intracellular-binding protein OS=Homo sapiens GN=FIBP PE=1 SV=3 - [FIBP\_HUMAN]  
Q72569 BRCA1-associated protein OS=Homo sapiens GN=BRAP PE=1 SV=2 - [BRAP\_HUMAN]  
Q9BW66 Cyclin-dependent kinase 2-interacting protein OS=Homo sapiens GN=CINP PE=1 SV=1 - [CINP\_HUMAN]  
Q14787 Transportin-2 OS=Homo sapiens GN=TNPO2 PE=1 SV=3 - [TNPO2\_HUMAN]  
Q9UBX1 Cathepsin F OS=Homo sapiens GN=CTSF PE=1 SV=1 - [CATF\_HUMAN]  
Q53EL6 Programmed cell death protein 4 OS=Homo sapiens GN=PDCD4 PE=1 SV=2 - [PDCD4\_HUMAN]  
P00734 Prothrombin OS=Homo sapiens GN=F2 PE=1 SV=2 - [THR3\_HUMAN]  
Q8N127 THO complex subunit 2 OS=Homo sapiens GN=THOC2 PE=1 SV=2 - [THOC2\_HUMAN]  
Q9Y221 60S ribosome subunit biogenesis protein NIP7 homolog OS=Homo sapiens GN=NIP7 PE=1 SV=1 - [NIP7\_HUMAN]  
Q13033 Striatin-3 OS=Homo sapiens GN=STRN3 PE=1 SV=3 - [STRN3\_HUMAN]  
Q81Y67 Ribonucleoprotein PTB-binding 1 OS=Homo sapiens GN=RAVER1 PE=1 SV=1 - [RAVR1\_HUMAN]  
Q13895 Bystin OS=Homo sapiens GN=BYSL PE=1 SV=3 - [BYST\_HUMAN]

Q86U42 Polyadenylate-binding protein 2 OS=Homo sapiens GN=PABPN1 PE=1 SV=3 - [PABP2\_HUMAN]  
Q9UQ16 Dynamin-3 OS=Homo sapiens GN=DNM3 PE=1 SV=4 - [DYN3\_HUMAN]  
Q8WU42 Peptidyl-prolyl cis-trans isomerase-like 4 OS=Homo sapiens GN=PP1L4 PE=1 SV=1 - [PP1L4\_HUMAN]  
000764 Pyridoxal kinase OS=Homo sapiens GN=PDXX PE=1 SV=1 - [PDXX\_HUMAN]  
075390 Citrate synthase, mitochondrial OS=Homo sapiens GN=CS PE=1 SV=2 - [CISY\_HUMAN]  
Q13535 Serine/threonine-protein kinase ATR OS=Homo sapiens GN=ATR PE=1 SV=3 - [ATR\_HUMAN]  
P06865 Beta-hexosaminidase subunit alpha OS=Homo sapiens GN=HEXA PE=1 SV=2 - [HEXA\_HUMAN]  
Q9Y2X3 Nucleolar protein 58 OS=Homo sapiens GN=NOP58 PE=1 SV=1 - [NOP58\_HUMAN]  
075396 Vesicle-trafficking protein SEC22B OS=Homo sapiens GN=SEC22B PE=1 SV=4 - [SEC22B\_HUMAN]  
Q13177 Serine/threonine-protein kinase PAK 2 OS=Homo sapiens GN=PAK2 PE=1 SV=3 - [PAK2\_HUMAN]  
Q66LE6 Serine/threonine-protein phosphatase 2A 55 kDa regulatory subunit B delta isoform OS=Homo sapiens GN=PPP2R2D PE=2 SV=1 - [2ABD\_HUMAN]  
Q9H583 HEAT repeat-containing protein 1 OS=Homo sapiens GN=HEATR1 PE=1 SV=3 - [HEAT1\_HUMAN]  
Q96JJ3 Engulfment and cell motility protein 2 OS=Homo sapiens GN=ELMO2 PE=1 SV=2 - [ELMO2\_HUMAN]  
Q13636 Ras-related protein Rab-31 OS=Homo sapiens GN=RAB31 PE=1 SV=1 - [RAB31\_HUMAN]  
Q9NW82 WD repeat-containing protein 70 OS=Homo sapiens GN=WDR70 PE=1 SV=1 - [WDR70\_HUMAN]  
P06756 Integrin alpha-V OS=Homo sapiens GN=ITGAV PE=1 SV=2 - [ITAV\_HUMAN]  
P46379 Large proline-rich protein BAG6 OS=Homo sapiens GN=BAG6 PE=1 SV=2 - [BAG6\_HUMAN]  
P41229 Lysine-specific demethylase 5C OS=Homo sapiens GN=KDM5C PE=1 SV=2 - [KDM5C\_HUMAN]  
F52434 DNA-directed RNA polymerases I, II, and III subunit RPABC3 OS=Homo sapiens GN=POLR2H PE=1 SV=4 - [RPAB3\_HUMAN]  
P28300 Protein phosphatase 6-oxidase OS=Homo sapiens GN=LOX PE=1 SV=2 - [LYOX\_HUMAN]  
Q9UNF1 Melanoma-associated antigen D2 OS=Homo sapiens GN=MAGED2 PE=1 SV=2 - [MAGD2\_HUMAN]  
Q9Y4W2 Ribosomal biogenesis protein LAS1L OS=Homo sapiens GN=LAS1L PE=1 SV=2 - [LAS1L\_HUMAN]  
Q9BTW9 Tubulin-specific chaperone D OS=Homo sapiens GN=TBCCD PE=1 SV=2 - [TBCCD\_HUMAN]  
P05186 Alkaline phosphatase, tissue-nonspecific isozyme OS=Homo sapiens GN=ALPL PE=1 SV=4 - [PPBT\_HUMAN]  
Q13492 Phosphatidylinositol-binding clathrin assembly protein OS=Homo sapiens GN=PICALM PE=1 SV=2 - [PICALM\_HUMAN]  
Q8T722 CD99 antigen-like protein 2 OS=Homo sapiens GN=CD99L2 PE=1 SV=1 - [C99L2\_HUMAN]  
Q9Y5R8 Trafficking protein particle complex subunit 1 OS=Homo sapiens GN=TRAPP1 PE=1 SV=1 - [TPPC1\_HUMAN]  
Q95753 Long-chain-fatty-acid--CoA ligase 3 OS=Homo sapiens GN=ACSL3 PE=1 SV=3 - [ACSL3\_HUMAN]  
P31942 Heterogeneous nuclear ribonucleoprotein H3 OS=Homo sapiens GN=HNRNP3 PE=1 SV=2 - [HNRH3\_HUMAN]  
P27824 Calnexin OS=Homo sapiens GN=CANX PE=1 SV=2 - [CALX\_HUMAN]  
Q30405 Urokinase plasminogen activator surface receptor OS=Homo sapiens GN=PLAUR PE=1 SV=1 - [UPAR\_HUMAN]  
Q95490 Latrophilin-2 OS=Homo sapiens GN=LPHN2 PE=1 SV=2 - [LPHN2\_HUMAN]  
P12081 Histidine--tRNA ligase, cytoplasmic OS=Homo sapiens GN=HARS PE=1 SV=2 - [SYHC\_HUMAN]  
P36957 Dihydropyridyllysine-residue succinyltransferase component of 2-oxoglutarate dehydrogenase complex, mitochondrial OS=Homo sapiens GN=DLST PE=1 SV=4 - [ODO2\_HUMAN]  
Q9Y570 Protein phosphatase methyltransferase 1 OS=Homo sapiens GN=PPME1 PE=1 SV=3 - [PPME1\_HUMAN]  
014757 Serine/threonine-protein kinase Chk1 OS=Homo sapiens GN=CHK1 PE=1 SV=2 - [CHK1\_HUMAN]  
P14550 Alcohol dehydrogenase [NADP(+)] OS=Homo sapiens GN=AKR1A1 PE=1 SV=3 - [AKR1A1\_HUMAN]  
075251 NADH dehydrogenase [ubiquinone] iron-sulfur protein 7, mitochondrial OS=Homo sapiens GN=NDUF57 PE=1 SV=3 - [NDU57\_HUMAN]  
Q92692 Nectin-2 OS=Homo sapiens GN=PNRL2 PE=1 SV=1 - [PVRL2\_HUMAN]  
P15924 Desmoplakin OS=Homo sapiens GN=DSP PE=1 SV=3 - [DESP\_HUMAN]  
Q86UK7 Zinc finger protein 598 OS=Homo sapiens GN=ZNF598 PE=1 SV=1 - [ZNF598\_HUMAN]  
Q81WJ2 GRIP and coiled-coil domain-containing protein 2 OS=Homo sapiens GN=GCC2 PE=1 SV=4 - [GCC2\_HUMAN]  
043414 ERI1 exoribonuclease 3 OS=Homo sapiens GN=ERI3 PE=1 SV=2 - [ERI3\_HUMAN]  
Q92673 Sortilin-related receptor OS=Homo sapiens GN=SORL1 PE=1 SV=2 - [SORL\_HUMAN]  
Q9H3U1 Protein unc-45 homolog A OS=Homo sapiens GN=UNC45A PE=1 SV=1 - [UN45A\_HUMAN]  
P45985 Dual specificity mitogen-activated protein kinase kinase 4 OS=Homo sapiens GN=MAP2K4 PE=1 SV=1 - [MP2K4\_HUMAN]  
Q9Y484 WD repeat domain phosphoinositide-interacting protein 4 OS=Homo sapiens GN=WDR45 PE=2 SV=1 - [WIP4\_HUMAN]  
P21399 Cytoplasmic aconitate hydratase OS=Homo sapiens GN=ACO1 PE=1 SV=3 - [ACOC\_HUMAN]  
P42785 Lysosomal Pro-X carboxypeptidase OS=Homo sapiens GN=PRCP PE=1 SV=1 - [PCP\_HUMAN]  
Q99956 Dual specificity protein phosphatase 9 OS=Homo sapiens GN=DUSP9 PE=1 SV=1 - [DUS9\_HUMAN]  
Q9UPT9 Ubiquitin carboxyl-terminal hydrolase 22 OS=Homo sapiens GN=USP22 PE=1 SV=2 - [UBP22\_HUMAN]  
E3 SUMO-protein ligase RanBP2 OS=Homo sapiens GN=RBAP2 PE=1 SV=2 - [RBP2\_HUMAN]  
Q9UBQ7 Glyoxylate reductase/hydroxypruvate reductase OS=Homo sapiens GN=GRHPR PE=1 SV=1 - [GRHPR\_HUMAN]  
P78406 mRNA export factor OS=Homo sapiens GN=RAE1 PE=1 SV=1 - [RAE1\_HUMAN]  
Q95295 SNARE-associated protein Snapin OS=Homo sapiens GN=SNAPIN PE=1 SV=1 - [SNAPIN\_HUMAN]  
P12429 Annexin A3 OS=Homo sapiens GN=ANXA3 PE=1 SV=3 - [ANXA3\_HUMAN]  
Q96DV4 39S ribosomal protein L38, mitochondrial OS=Homo sapiens GN=MRPL38 PE=1 SV=2 - [RM38\_HUMAN]  
060508 Pre-mRNA-processing factor 17 OS=Homo sapiens GN=CDC40 PE=1 SV=1 - [PRP17\_HUMAN]  
075347 Tubulin-specific chaperone A OS=Homo sapiens GN=TBCA PE=1 SV=3 - [TBCA\_HUMAN]  
Q9BS18 Anaphase-promoting complex subunit 13 OS=Homo sapiens GN=ANAPC13 PE=1 SV=1 - [APC13\_HUMAN]  
Q9GZ79 Ubiquitin-like modifier-activating enzyme 5 OS=Homo sapiens GN=UBA5 PE=1 SV=1 - [UBA5\_HUMAN]  
P01130 Low-density lipoprotein receptor OS=Homo sapiens GN=LDLR PE=1 SV=1 - [LDLR\_HUMAN]  
Q8NEM2 SHC SH2 domain-binding protein 1 OS=Homo sapiens GN=SHCBP1 PE=1 SV=3 - [SHCBP\_HUMAN]  
Q86X10 Ral GTPase-activating protein subunit beta OS=Homo sapiens GN=RALGAPB PE=1 SV=1 - [RLGPB\_HUMAN]  
Q96C25 Mediator of RNA polymerase II transcription subunit 8 OS=Homo sapiens GN=MED8 PE=1 SV=2 - [MED8\_HUMAN]  
Q14168 MAGUK p55 subfamily member 2 OS=Homo sapiens GN=MPP2 PE=1 SV=3 - [MPP2\_HUMAN]  
P57721 Poly(C)-binding protein 3 OS=Homo sapiens GN=PCBP3 PE=2 SV=2 - [PCBP3\_HUMAN]  
Q6NXR4 TEL2-interacting protein 2 OS=Homo sapiens GN=TTI2 PE=1 SV=1 - [TTI2\_HUMAN]  
Q96RF0 Sorting nexin-18 OS=Homo sapiens GN=SNX18 PE=1 SV=2 - [SNX18\_HUMAN]  
075419 Cell division control protein 45 homolog OS=Homo sapiens GN=CDC45 PE=1 SV=1 - [CDC45\_HUMAN]  
P42695 Condensin-2 complex subunit D3 OS=Homo sapiens GN=NCAPD3 PE=1 SV=2 - [CND3\_HUMAN]  
Q86UV5 Ubiquitin carboxyl-terminal hydrolase 48 OS=Homo sapiens GN=USP48 PE=1 SV=1 - [UBP48\_HUMAN]  
Q81XW5 Putative RNA polymerase II subunit B1 CTD phosphatase RPAP2 OS=Homo sapiens GN=RPAP2 PE=1 SV=1 - [RPAP2\_HUMAN]  
P36955 Pigment epithelium-derived factor OS=Homo sapiens GN=SERPINF1 PE=1 SV=4 - [PEDF\_HUMAN]  
Q13395 Probable methyltransferase TARBP1 OS=Homo sapiens GN=TARBP1 PE=1 SV=1 - [TARBP1\_HUMAN]  
Q8T4Q2 SWI/SNF complex subunit SMARCC2 OS=Homo sapiens GN=SMARCC2 PE=1 SV=1 - [SMRC2\_HUMAN]  
P16949 Statmin OS=Homo sapiens GN=STMN1 PE=1 SV=3 - [STMN1\_HUMAN]  
Q9NXP1 Testis-expressed sequence 10 protein OS=Homo sapiens GN=TEX10 PE=1 SV=2 - [TEX10\_HUMAN]  
Q9Y662 Heparan sulfate glucosaminyl 3-O-sulfotransferase 3B1 OS=Homo sapiens GN=HS3ST3B1 PE=1 SV=1 - [HS3SB\_HUMAN]  
Q8WY33 U4/U6 small nuclear ribonucleoprotein Prp31 OS=Homo sapiens GN=PRPF31 PE=1 SV=2 - [PRP31\_HUMAN]  
000139 Kinesin-like protein KIF2A OS=Homo sapiens GN=KIF2A PE=1 SV=3 - [KIF2A\_HUMAN]  
Q92562 Polyphosphoinositide phosphatase OS=Homo sapiens GN=FIG4 PE=1 SV=1 - [FIG4\_HUMAN]  
Q12797 Aspartyl/asparaginyl beta-hydroxylase OS=Homo sapiens GN=ASPH PE=1 SV=3 - [ASPH\_HUMAN]  
P40763 Signal transducer and activator of transcription 3 OS=Homo sapiens GN=STAT3 PE=1 SV=2 - [STAT3\_HUMAN]  
Q12884 Prolyl endopeptidase FAP OS=Homo sapiens GN=FAP PE=1 SV=5 - [SEPR\_HUMAN]  
P19174 1-phosphatidylinositol 4,5-bisphosphate phosphodiesterase gamma-1 OS=Homo sapiens GN=PLCG1 PE=1 SV=1 - [PLCG1\_HUMAN]  
Q9P2K8 Eukaryotic translation initiation factor 2-alpha kinase 4 OS=Homo sapiens GN=EIF2AK4 PE=1 SV=3 - [E2AK4\_HUMAN]  
Q96BJ3 Axin interactor, dorsalization-associated protein OS=Homo sapiens GN=AIDA PE=1 SV=1 - [AIDA\_HUMAN]  
Q5R372 Rab GTPase-activating protein 1-like OS=Homo sapiens GN=RABGAP1L PE=1 SV=1 - [RBG1L\_HUMAN]  
Q9UN51 Protein timeless homolog OS=Homo sapiens GN=TIMELESS PE=1 SV=2 - [TIM\_HUMAN]  
P49902 Cytosolic purine 5'-nucleotidase OS=Homo sapiens GN=NT5C2 PE=1 SV=1 - [NT5C2\_HUMAN]  
Q90104 Gamma-enolase OS=Homo sapiens GN=ENO2 PE=1 SV=3 - [ENOG\_HUMAN]  
P13929 Beta-enolase OS=Homo sapiens GN=ENO3 PE=1 SV=5 - [ENOB\_HUMAN]  
Q15397 Pumilio domain-containing protein KIAA0020 OS=Homo sapiens GN=KIAA0020 PE=1 SV=3 - [K0020\_HUMAN]  
Q81Z69 tRNA (uracil-5)-methyltransferase homolog A OS=Homo sapiens GN=TRMT2A PE=1 SV=2 - [TRMT2A\_HUMAN]  
Q13576 Ras GTPase-activating-like protein IQGAP2 OS=Homo sapiens GN=IQGAP2 PE=1 SV=4 - [IQGA2\_HUMAN]  
P23229 Integrin alpha-6 OS=Homo sapiens GN=ITGA6 PE=1 SV=5 - [ITAG\_HUMAN]  
Q8N441 Fibroblast growth factor receptor-like 1 OS=Homo sapiens GN=FGFR1 PE=1 SV=1 - [FGRL1\_HUMAN]  
Q9N2Q9 Putative RNA-binding protein Luc7-like 1 OS=Homo sapiens GN=LUC7L PE=1 SV=1 - [LUC7L\_HUMAN]  
Q5VQ6 Ubiquitin thioesterase OTU1 OS=Homo sapiens GN=YOD1 PE=1 SV=1 - [OTU1\_HUMAN]  
Q6L8Q7 2', 5'-phosphodiesterase 12 OS=Homo sapiens GN=PDE12 PE=1 SV=2 - [PDE12\_HUMAN]  
Q9BW27 Nuclear pore complex protein Nup85 OS=Homo sapiens GN=NUP85 PE=1 SV=1 - [NUP85\_HUMAN]  
P26583 High mobility group protein B2 OS=Homo sapiens GN=HMGB2 PE=1 SV=2 - [HMGB2\_HUMAN]  
P24347 Stromelysin-3 OS=Homo sapiens GN=MMP11 PE=1 SV=3 - [MMP11\_HUMAN]  
Q16543 Hsp90 co-chaperone Cdc37 OS=Homo sapiens GN=CDC37 PE=1 SV=1 - [CDC37\_HUMAN]  
000291 Huntingtin-interacting protein 1 OS=Homo sapiens GN=HIP1 PE=1 SV=5 - [HIP1\_HUMAN]  
P33908 Mannosyl-oligosaccharide 1,2-alpha-mannosidase IA OS=Homo sapiens GN=MAN1A1 PE=1 SV=3 - [MA1A1\_HUMAN]  
Q9NRY4 Rho GTPase-activating protein 35 OS=Homo sapiens GN=ARHGAP35 PE=1 SV=3 - [RHG35\_HUMAN]  
Q13107 Ubiquitin carboxyl-terminal hydrolase 4 OS=Homo sapiens GN=USP4 PE=1 SV=3 - [UBP4\_HUMAN]  
Q8WWM7 Ataxin-2-like protein OS=Homo sapiens GN=ATXN2L PE=1 SV=2 - [ATX2L\_HUMAN]  
Q96S73 Paired amphipathic helix protein Sin3a OS=Homo sapiens GN=SIN3A PE=1 SV=2 - [SIN3A\_HUMAN]  
Q95819 Mitogen-activated protein kinase kinase kinase 4 OS=Homo sapiens GN=MAP4K4 PE=1 SV=2 - [M4K4\_HUMAN]  
Q86S22 Trafficking protein particle complex subunit 6B OS=Homo sapiens GN=TRAPP6B PE=1 SV=1 - [TPC6B\_HUMAN]  
Q9NZL9 Methionine adenosyltransferase 2 subunit beta OS=Homo sapiens GN=MAT2B PE=1 SV=1 - [MAT2B\_HUMAN]  
Q9HCP0 Casein kinase I isoform gamma-1 OS=Homo sapiens GN=CSNK1G1 PE=1 SV=1 - [KC1G1\_HUMAN]

Q96SB8 Structural maintenance of chromosomes protein 6 OS=Homo sapiens GN=SMC6 PE=1 SV=2 - [SMC6\_HUMAN]  
Q92889 DNA repair endonuclease XPF OS=Homo sapiens GN=ERCC4 PE=1 SV=3 - [XPF\_HUMAN]  
Q9NXH9 tRNA (guanine(26)-N(2))-dimethyltransferase OS=Homo sapiens GN=TRMT1 PE=1 SV=1 - [TRMT1\_HUMAN]  
Q9UNH7 Sorting nexin-6 OS=Homo sapiens GN=SNX6 PE=1 SV=1 - [SNX6\_HUMAN]  
Q8WVM8 Sec1 family domain-containing protein 1 OS=Homo sapiens GN=SCFD1 PE=1 SV=4 - [SCFD1\_HUMAN]  
P15374 Ubiquitin carboxyl-terminal hydrolase isozyme L3 OS=Homo sapiens GN=UCHL3 PE=1 SV=1 - [UCHL3\_HUMAN]  
Q8NSM4 Tetraatricopeptide repeat protein 9C OS=Homo sapiens GN=TTC9C PE=1 SV=1 - [TTC9C\_HUMAN]  
Q9UPN3 Microtubule-actin cross-linking factor 1, isoforms 1/2/3/5 OS=Homo sapiens GN=MACF1 PE=1 SV=4 - [MACF1\_HUMAN]  
Q8TAGE Exocyst complex component 6 OS=Homo sapiens GN=EXOC6 PE=1 SV=3 - [EXOC6\_HUMAN]  
Q9HAA9 Aminopeptidase B OS=Homo sapiens GN=RNPEP PE=1 SV=2 - [AMPB\_HUMAN]  
Q60231 Putative pre-mRNA-splicing factor ATP-dependent RNA helicase DHX16 OS=Homo sapiens GN=DHX16 PE=1 SV=2 - [DHX16\_HUMAN]  
P40939 Trifunctional enzyme subunit alpha, mitochondrial OS=Homo sapiens GN=HADHA PE=1 SV=2 - [ECHA\_HUMAN]  
Q81ZL8 Proline-, glutamic acid- and leucine-rich protein 1 OS=Homo sapiens GN=PELP1 PE=1 SV=2 - [PELP1\_HUMAN]  
Q9NWS0 PIH1 domain-containing protein 1 OS=Homo sapiens GN=PIH1D1 PE=1 SV=1 - [PIH1D1\_HUMAN]  
Q99547 M-phase phosphoprotein 6 OS=Homo sapiens GN=MPHOSPH6 PE=1 SV=2 - [MPH6\_HUMAN]  
Q9UHR6 Zinc finger HIT domain-containing protein 2 OS=Homo sapiens GN=ZNHT2 PE=1 SV=1 - [ZNHT2\_HUMAN]  
Q535F7 Cordon-bleu protein-like 1 OS=Homo sapiens GN=COBL1 PE=1 SV=2 - [COBL1\_HUMAN]  
Q5VTL8 Pre-mRNA-splicing factor 38B OS=Homo sapiens GN=PRPF38B PE=1 SV=1 - [PR38B\_HUMAN]  
P30085 UMP-CMP kinase OS=Homo sapiens GN=CMCK1 PE=1 SV=3 - [KCY\_HUMAN]  
P62745 Rho-related GTP-binding protein RhoB OS=Homo sapiens GN=RHOB PE=1 SV=1 - [RHOB\_HUMAN]  
Q9Y316 Protein MEMO1 OS=Homo sapiens GN=MEMO1 PE=1 SV=1 - [MEMO1\_HUMAN]  
Q6PCB8 Embigin OS=Homo sapiens GN=EMB PE=1 SV=1 - [EMB\_HUMAN]  
Q15042 U2 snRNP-associated SURP motif-containing protein OS=Homo sapiens GN=U2SURP PE=1 SV=2 - [SR140\_HUMAN]  
Q07065 Cytoskeleton-associated protein 4 OS=Homo sapiens GN=CKAP4 PE=1 SV=2 - [CKAP4\_HUMAN]  
Q9UPN9 E3 ubiquitin-protein ligase TRIM33 OS=Homo sapiens GN=TRIM33 PE=1 SV=3 - [TR133\_HUMAN]  
Q969X6 Cirhin OS=Homo sapiens GN=CIRH1A PE=1 SV=1 - [CIR1A\_HUMAN]  
Q98VP2 Guanine nucleotide-binding protein-like 3 OS=Homo sapiens GN=GNL3 PE=1 SV=2 - [GNL3\_HUMAN]  
Q9NYS9 Abl interactor 2 OS=Homo sapiens GN=ABI2 PE=1 SV=1 - [ABI2\_HUMAN]  
Q60784 Target of Myb protein 1 OS=Homo sapiens GN=TOM1 PE=1 SV=2 - [TOM1\_HUMAN]  
P09471 Guanine nucleotide-binding protein G(o) subunit alpha OS=Homo sapiens GN=GNAO1 PE=1 SV=4 - [GNAO\_HUMAN]  
P49257 Protein ERGIC-53 OS=Homo sapiens GN=LMAN1 PE=1 SV=2 - [LMAN1\_HUMAN]  
Q02880 DNA topoisomerase 2-beta OS=Homo sapiens GN=TOP2B PE=1 SV=3 - [TOP2B\_HUMAN]  
Q8NBS9 Thioredoxin domain-containing protein 5 OS=Homo sapiens GN=TXNDC5 PE=1 SV=2 - [TXNDC5\_HUMAN]  
Q8WTV0 Scavenger receptor class B member 1 OS=Homo sapiens GN=SCARB1 PE=1 SV=1 - [SCRB1\_HUMAN]  
Q96S19 Spermatid perinuclear RNA-binding protein OS=Homo sapiens GN=STRBP PE=1 SV=1 - [STRBP\_HUMAN]  
Q9NP16 mRNA-decapping enzyme 1A OS=Homo sapiens GN=DCP1A PE=1 SV=2 - [DCP1A\_HUMAN]  
Q9NR31 GTP-binding protein SAR1a OS=Homo sapiens GN=SAR1A PE=1 SV=1 - [SAR1A\_HUMAN]  
Q72275 TRMT1-like protein OS=Homo sapiens GN=TRMT1L PE=1 SV=2 - [TRMT1L\_HUMAN]  
Q8NB46 Serine/threonine-protein phosphatase 6 regulatory ankyrin repeat subunit C OS=Homo sapiens GN=ANKRD52 PE=1 SV=3 - [ANR52\_HUMAN]  
P00387 NADH-cytochrome b5 reductase 3 OS=Homo sapiens GN=CYB5R3 PE=1 SV=3 - [NBSR3\_HUMAN]  
Q9HOC8 Integrin-linked kinase-associated serine/threonine phosphatase 2C OS=Homo sapiens GN=ILKAP PE=1 SV=1 - [ILKAP\_HUMAN]  
Q95248 Myotubularin-related protein 5 OS=Homo sapiens GN=SBF1 PE=1 SV=3 - [MTMR5\_HUMAN]  
Q776J9 tRNA-splicing endonuclease subunit Sen54 OS=Homo sapiens GN=TSEN54 PE=1 SV=3 - [SEN54\_HUMAN]  
Q81ZP0 Abl interactor 1 OS=Homo sapiens GN=ABI1 PE=1 SV=4 - [ABI1\_HUMAN]  
Q99719 Septin-5 OS=Homo sapiens GN=SEPT5 PE=1 SV=1 - [SEPT5\_HUMAN]  
Q9P2J3 Kelch-like protein 9 OS=Homo sapiens GN=KLHL9 PE=1 SV=2 - [KLHL9\_HUMAN]  
P35520 Cystathionine beta-synthase OS=Homo sapiens GN=CBS PE=1 SV=2 - [CBS\_HUMAN]  
P52799 Ephrin-B2 OS=Homo sapiens GN=EFNB2 PE=1 SV=1 - [EFNB2\_HUMAN]  
Q5JUG9 Torsin-2A OS=Homo sapiens GN=TOR2A PE=2 SV=1 - [TOR2A\_HUMAN]  
Q14545 TRAF-type zinc finger domain-containing protein 1 OS=Homo sapiens GN=TRAFD1 PE=1 SV=1 - [TRAD1\_HUMAN]  
Q07666 KH domain-containing, RNA-binding, signal transduction-associated protein 1 OS=Homo sapiens GN=KHDRBS1 PE=1 SV=1 - [KHDR1\_HUMAN]  
Q81WX8 Calcium homeostasis endoplasmic reticulum protein OS=Homo sapiens GN=CHERP PE=1 SV=3 - [CHERP\_HUMAN]  
P31749 RAC-alpha serine/threonine-protein kinase OS=Homo sapiens GN=AKT1 PE=1 SV=2 - [AKT1\_HUMAN]  
Q9NV70 Exocyst complex component 1 OS=Homo sapiens GN=EXOC1 PE=1 SV=4 - [EXOC1\_HUMAN]  
Q75044 SLIT-RHO Rho GTPase-activating protein 2 OS=Homo sapiens GN=SRGAP2 PE=1 SV=2 - [SRGP2\_HUMAN]  
Q9NS87 Kinesin-like protein KIF15 OS=Homo sapiens GN=KIF15 PE=1 SV=1 - [KIF15\_HUMAN]  
Q9UL33 Trafficking protein particle complex subunit 2-like protein OS=Homo sapiens GN=TRAPP2L PE=1 SV=1 - [TPC2L\_HUMAN]  
Q13618 Cullin-3 OS=Homo sapiens GN=CUL3 PE=1 SV=2 - [CUL3\_HUMAN]  
Q9CZNI Actin-related protein 6 OS=Homo sapiens GN=ACTR6 PE=1 SV=1 - [ARP6\_HUMAN]  
P08648 Integrin alpha-5 OS=Homo sapiens GN=ITGA5 PE=1 SV=2 - [ITGA5\_HUMAN]  
Q9BYG0 Lactosylceramide 1,3-N-acetyl-beta-D-glucosaminyltransferase OS=Homo sapiens GN=B3GNT5 PE=1 SV=1 - [B3GNT5\_HUMAN]  
P49354 Protein farnesyltransferase/geranylgeranyltransferase type-1 subunit alpha OS=Homo sapiens GN=FNTA PE=1 SV=1 - [FNTA\_HUMAN]  
Q43140 Zinc finger ZZ-type and EF-hand domain-containing protein 1 OS=Homo sapiens GN=ZZEF1 PE=1 SV=6 - [ZZEF1\_HUMAN]  
Q9UM82 Spermatogenesis-associated protein 2 OS=Homo sapiens GN=SPATA2 PE=1 SV=2 - [SPAT2\_HUMAN]  
A6NDU8 UPP0600 protein C5orf51 OS=Homo sapiens GN=C5orf51 PE=1 SV=1 - [CE051\_HUMAN]  
Q9UL15 BAG family molecular chaperone regulator 5 OS=Homo sapiens GN=BAG5 PE=1 SV=1 - [BAG5\_HUMAN]  
Q96EP0 E3 ubiquitin-protein ligase RNF31 OS=Homo sapiens GN=RNF31 PE=1 SV=1 - [RNF31\_HUMAN]  
Q07021 Complement component 1 Q subcomponent-binding protein, mitochondrial OS=Homo sapiens GN=C1QBPE=1 SV=1 - [C1QBPE\_HUMAN]  
P15586 N-acetylglucosamine-6-sulfatase OS=Homo sapiens GN=GNS PE=1 SV=3 - [GNS\_HUMAN]  
P50851 Lipopolysaccharide-responsive and beige-like anchor protein OS=Homo sapiens GN=LRBA PE=1 SV=4 - [LRBA\_HUMAN]  
Q05655 Protein kinase C delta type OS=Homo sapiens GN=PRKCD PE=1 SV=2 - [PKCD\_HUMAN]  
Q9Y6W5 Wiskott-Aldrich syndrome protein family member 2 OS=Homo sapiens GN=WASF2 PE=1 SV=3 - [WASF2\_HUMAN]  
Q86UF1 Tetraspanin-33 OS=Homo sapiens GN=TSPAN33 PE=2 SV=1 - [TSPAN33\_HUMAN]  
P10515 Dihydrolipoyllysine-residue acetyltransferase component of pyruvate dehydrogenase complex, mitochondrial OS=Homo sapiens GN=DLAT PE=1 SV=3 - [ODP2\_HUMAN]  
P30520 Adenylosuccinate synthetase isozyme 2 OS=Homo sapiens GN=ADSS PE=1 SV=3 - [PURA2\_HUMAN]  
Q68EM7 Rho GTPase-activating protein 17 OS=Homo sapiens GN=ARHGAP17 PE=1 SV=1 - [RHG17\_HUMAN]  
Q96P48 Arf-GAP with Rho-GAP domain, ANK repeat and PH domain-containing protein 1 OS=Homo sapiens GN=ARAP1 PE=1 SV=3 - [ARAP1\_HUMAN]  
Q8WU90 Zinc finger CCH domain-containing protein 15 OS=Homo sapiens GN=ZC3H15 PE=1 SV=1 - [ZC3HF\_HUMAN]  
Q14147 Probable ATP-dependent RNA helicase DHX34 OS=Homo sapiens GN=DHX34 PE=1 SV=2 - [DHX34\_HUMAN]  
Q9P2N7 Kelch-like protein 13 OS=Homo sapiens GN=KLHL13 PE=1 SV=3 - [KLHL13\_HUMAN]  
Q14703 Membrane-bound transcription factor site-1 protease OS=Homo sapiens GN=MBTPS1 PE=1 SV=1 - [MBTP1\_HUMAN]  
P43250 G protein-coupled receptor kinase 6 OS=Homo sapiens GN=GRK6 PE=1 SV=2 - [GRK6\_HUMAN]  
Q95985 DNA topoisomerase 3-beta-1 OS=Homo sapiens GN=TOP3B PE=1 SV=1 - [TOP3B\_HUMAN]  
Q75096 Low-density lipoprotein receptor-related protein 4 OS=Homo sapiens GN=LRP4 PE=1 SV=4 - [LRP4\_HUMAN]  
P29372 DNA-3-methyladenine glycosylase OS=Homo sapiens GN=MGP PE=1 SV=3 - [3MG\_HUMAN]  
Q8NEL9 Phospholipase DDHD1 OS=Homo sapiens GN=DDHD1 PE=1 SV=2 - [DDHD1\_HUMAN]  
Q81U81 Interferon regulatory factor 2-binding protein 1 OS=Homo sapiens GN=IRF2BP1 PE=1 SV=1 - [I2BP1\_HUMAN]  
Q92558 Wiskott-Aldrich syndrome protein family member 1 OS=Homo sapiens GN=WASF1 PE=1 SV=1 - [WASF1\_HUMAN]  
Q96CW5 Gamma-tubulin complex component 3 OS=Homo sapiens GN=TUBGCP3 PE=1 SV=2 - [GCP3\_HUMAN]  
P02649 Apolipoprotein E OS=Homo sapiens GN=APOE PE=1 SV=1 - [APOE\_HUMAN]  
Q02487 Desmocollin-2 OS=Homo sapiens GN=DSC2 PE=1 SV=1 - [DSC2\_HUMAN]  
Q15037 Protein KHNYN OS=Homo sapiens GN=KHNYN PE=1 SV=3 - [KHNYN\_HUMAN]  
Q9UKZ1 CCR4-NOT transcription complex subunit 11 OS=Homo sapiens GN=CNOT11 PE=1 SV=1 - [CNOT11\_HUMAN]  
Q00688 Peptidyl-prolyl cis-trans isomerase FKBP3 OS=Homo sapiens GN=FKBP3 PE=1 SV=1 - [FKBP3\_HUMAN]  
P31483 Nucleolysin TIA-1 isoform p40 OS=Homo sapiens GN=TIA1 PE=1 SV=3 - [TIA1\_HUMAN]  
Q15427 Splicing factor 3B subunit 4 OS=Homo sapiens GN=SF3B4 PE=1 SV=1 - [SF3B4\_HUMAN]  
Q9Y237 Peptidyl-prolyl cis-trans isomerase NIMA-interacting 4 OS=Homo sapiens GN=PIN4 PE=1 SV=1 - [PIN4\_HUMAN]  
Q96QD8 Sodium-coupled neutral amino acid transporter 2 OS=Homo sapiens GN=SLC38A2 PE=1 SV=2 - [S38A2\_HUMAN]  
P24043 Laminin subunit alpha-2 OS=Homo sapiens GN=LAMA2 PE=1 SV=4 - [LAMA2\_HUMAN]  
Q15022 Polycarbonyl protein SUZ12 OS=Homo sapiens GN=SUZ12 PE=1 SV=3 - [SUZ12\_HUMAN]  
Q14393 Growth arrest-specific protein 6 OS=Homo sapiens GN=GAS6 PE=1 SV=2 - [GAS6\_HUMAN]  
Q9NZW5 MAGUK p55 subfamily member 6 OS=Homo sapiens GN=MPP6 PE=1 SV=2 - [MPP6\_HUMAN]  
P19367 Hexokinase-1 OS=Homo sapiens GN=HK1 PE=1 SV=3 - [HK1\_HUMAN]  
P14314 Glucosylase 2 subunit beta OS=Homo sapiens GN=PRKCSH PE=1 SV=2 - [GLU2B\_HUMAN]  
P37198 Nuclear pore glycoprotein p62 OS=Homo sapiens GN=NUP62 PE=1 SV=3 - [NUP62\_HUMAN]  
Q96RU3 Formin-binding protein 1 OS=Homo sapiens GN=FBNP1 PE=1 SV=2 - [FBNP1\_HUMAN]  
P11171 Protein 4.1 OS=Homo sapiens GN=EPP41 PE=1 SV=4 - [41\_HUMAN]  
Q12846 Syntaxin-4 OS=Homo sapiens GN=STX4 PE=1 SV=2 - [STX4\_HUMAN]  
Q15582 Transforming growth factor-beta-induced protein ig-h3 OS=Homo sapiens GN=IGFBP3 PE=1 SV=1 - [BGR3\_HUMAN]  
Q6ZUX7 Lipoma HMGIC fusion partner-like 2 protein OS=Homo sapiens GN=LHFPL2 PE=2 SV=2 - [LHPL2\_HUMAN]  
P35637 RNA-binding protein FUS OS=Homo sapiens GN=FUS PE=1 SV=1 - [FUS\_HUMAN]  
Q9BYD1 39S ribosomal protein L13, mitochondrial OS=Homo sapiens GN=MRPL13 PE=1 SV=1 - [RM13\_HUMAN]  
Q969E2 Secretory carrier-associated membrane protein 4 OS=Homo sapiens GN=SCAMP4 PE=2 SV=1 - [SCAM4\_HUMAN]  
Q96HN2 Putative adenosylhomocysteinase 3 OS=Homo sapiens GN=AHCLY2 PE=1 SV=1 - [SAH3\_HUMAN]  
Q75955 Flotillin-1 OS=Homo sapiens GN=FLT1 PE=1 SV=3 - [FLT1\_HUMAN]

P25098 Beta-adrenergic receptor kinase 1 OS=Homo sapiens GN=ADRBK1 PE=1 SV=2 - [ARBK1\_HUMAN]  
Q15650 Activating signal cointegrator 1 OS=Homo sapiens GN=TRIP4 PE=1 SV=4 - [TRIP4\_HUMAN]  
Q96AG4 Leucine-rich repeat-containing protein 59 OS=Homo sapiens GN=LRC59 PE=1 SV=1 - [LRC59\_HUMAN]  
Q12931 Heat shock protein 75 kDa, mitochondrial OS=Homo sapiens GN=TRAP1 PE=1 SV=3 - [TRAP1\_HUMAN]  
Q8N6R0 Methyltransferase-like protein 13 OS=Homo sapiens GN=METT13 PE=1 SV=1 - [METT13\_HUMAN]  
P42892 Endothelin-converting enzyme 1 OS=Homo sapiens GN=ECE1 PE=1 SV=2 - [ECE1\_HUMAN]  
Q92759 General transcription factor IIIH subunit 4 OS=Homo sapiens GN=GTF2H4 PE=2 SV=1 - [GTF2H4\_HUMAN]  
P50213 Isocitrate dehydrogenase [NAD] subunit alpha, mitochondrial OS=Homo sapiens GN=IDH3A PE=1 SV=1 - [IDH3A\_HUMAN]  
Q95219 Sorting nexin-4 OS=Homo sapiens GN=SNX4 PE=1 SV=1 - [SNX4\_HUMAN]  
P49184 Deoxyribonuclease-1-like 1 OS=Homo sapiens GN=DNASE1L1 PE=1 SV=1 - [DNSE1L1\_HUMAN]  
Q9BSL1 Ubiquitin-associated domain-containing protein 1 OS=Homo sapiens GN=UBAC1 PE=1 SV=1 - [UBAC1\_HUMAN]  
Q9BUJ2 Heterogeneous nuclear ribonucleoprotein U-like protein 1 OS=Homo sapiens GN=HNRNPUL1 PE=1 SV=2 - [HNRNPUL1\_HUMAN]  
Q9P015 39S ribosomal protein L15, mitochondrial OS=Homo sapiens GN=MRPL15 PE=1 SV=1 - [MRPL15\_HUMAN]  
P20908 Collagen alpha-1(V) chain OS=Homo sapiens GN=COL5A1 PE=1 SV=3 - [COL5A1\_HUMAN]  
Q9UBV8 Peflin OS=Homo sapiens GN=PEF1 PE=1 SV=1 - [PEF1\_HUMAN]  
Q9H3S7 Tyrosine-protein phosphatase non-receptor type 23 OS=Homo sapiens GN=PTPN23 PE=1 SV=1 - [PTN23\_HUMAN]  
Q9Y6J9 TAF6-like RNA polymerase II p300/CBP-associated factor-associated factor 65 kDa subunit 6L OS=Homo sapiens GN=TAF6L PE=1 SV=1 - [TAF6L\_HUMAN]  
Q9BXPS Serrate RNA effector molecule homolog OS=Homo sapiens GN=SRRT PE=1 SV=1 - [SRRT\_HUMAN]  
Q9UHN6 Transmembrane protein 2 OS=Homo sapiens GN=TMEM2 PE=1 SV=1 - [TMEM2\_HUMAN]  
Q95487 Protein transport protein Sec24B OS=Homo sapiens GN=SEC24B PE=1 SV=2 - [SEC24B\_HUMAN]  
Q13112 Chromatin assembly factor 1 subunit B OS=Homo sapiens GN=CHAF1B PE=1 SV=1 - [CAF1B\_HUMAN]  
Q9Y4C1 Lysine-specific demethylase 3A OS=Homo sapiens GN=KDM3A PE=1 SV=4 - [KDM3A\_HUMAN]  
Q9H0H5 Rac GTPase-activating protein 1 OS=Homo sapiens GN=RACGAP1 PE=1 SV=1 - [RGAP1\_HUMAN]  
Q9Y6G5 COM domain-containing protein 10 OS=Homo sapiens GN=COMMD10 PE=1 SV=1 - [COMMD10\_HUMAN]  
Q60243 Heparan sulfate 6-O-sulfotransferase 1 OS=Homo sapiens GN=HS6ST1 PE=1 SV=5 - [HS6ST1\_HUMAN]  
Q12756 Kinesin-like protein KIF1A OS=Homo sapiens GN=KIF1A PE=1 SV=2 - [KIF1A\_HUMAN]  
P19838 Nuclear factor NF-kappa-B p105 subunit OS=Homo sapiens GN=NFKB1 PE=1 SV=2 - [NFKB1\_HUMAN]  
Q96GM8 Target of EGR1 protein 1 OS=Homo sapiens GN=TOE1 PE=1 SV=1 - [TOE1\_HUMAN]  
Q9UBK9 Protein UXT OS=Homo sapiens GN=UXT PE=1 SV=1 - [UXT\_HUMAN]  
Q99829 Copine-1 OS=Homo sapiens GN=CPNE1 PE=1 SV=1 - [CPNE1\_HUMAN]  
Q9UER7 Death domain-associated protein 6 OS=Homo sapiens GN=DAXX PE=1 SV=2 - [DAXX\_HUMAN]  
Q06323 Proteasome activator complex subunit 1 OS=Homo sapiens GN=PSME1 PE=1 SV=1 - [PSME1\_HUMAN]  
Q86U38 Nucleolar protein 9 OS=Homo sapiens GN=NOP9 PE=1 SV=1 - [NOP9\_HUMAN]  
Q9HAU5 Regulator of nonsense transcripts 2 OS=Homo sapiens GN=UPP2 PE=1 SV=1 - [RENT2\_HUMAN]  
Q9BSJ8 Extended synaptotagmin-1 OS=Homo sapiens GN=ESYT1 PE=1 SV=1 - [ESYT1\_HUMAN]  
P00533 Epidermal growth factor receptor OS=Homo sapiens GN=EGFR PE=1 SV=2 - [EGFR\_HUMAN]  
P48147 Prolyl endopeptidase OS=Homo sapiens GN=PREP PE=1 SV=2 - [PPCE\_HUMAN]  
Q95025 Semaphorin-3D OS=Homo sapiens GN=SEMA3D PE=2 SV=2 - [SEMSD\_HUMAN]  
P24863 Cyclin-C OS=Homo sapiens GN=CCNC PE=1 SV=2 - [CCNC\_HUMAN]  
Q9BXX0 EMILIN-2 OS=Homo sapiens GN=EMILIN2 PE=1 SV=3 - [EMIL2\_HUMAN]  
Q15833 Syntaxin-binding protein 2 OS=Homo sapiens GN=STXB2 PE=1 SV=2 - [STXB2\_HUMAN]  
Q75448 Mediator of RNA polymerase II transcription subunit 24 OS=Homo sapiens GN=MED24 PE=1 SV=1 - [MED24\_HUMAN]  
Q99661 Kinesin-like protein KIF2C OS=Homo sapiens GN=KIF2C PE=1 SV=2 - [KIF2C\_HUMAN]  
Q9HB07 UPP0160 protein MYG1, mitochondrial OS=Homo sapiens GN=C12orf10 PE=1 SV=2 - [MYG1\_HUMAN]  
P54725 UV excision repair protein RAD23 homolog A OS=Homo sapiens GN=RAD23A PE=1 SV=1 - [RD23A\_HUMAN]  
Q86U7U Histone-lysine N-methyltransferase setd3 OS=Homo sapiens GN=SETD3 PE=1 SV=1 - [SETD3\_HUMAN]  
Q9C0C2 182 kDa tankyrase-1-binding protein OS=Homo sapiens GN=TNKS1BP1 PE=1 SV=4 - [TB182\_HUMAN]  
Q95671 N-acetylserotonin O-methyltransferase-like protein OS=Homo sapiens GN=ASMTL PE=1 SV=3 - [ASML\_HUMAN]  
Q92614 Unconventional myosin-XVIIia OS=Homo sapiens GN=MYO18A PE=1 SV=3 - [MY18A\_HUMAN]  
P39656 Dolichyl-diphosphooligosaccharide-protein glycosyltransferase 48 kDa subunit OS=Homo sapiens GN=DDOST PE=1 SV=4 - [OST48\_HUMAN]  
Q13596 Sorting nexin-1 OS=Homo sapiens GN=SNX1 PE=1 SV=3 - [SNX1\_HUMAN]  
Q96T88 E3 ubiquitin-protein ligase UHRF1 OS=Homo sapiens GN=UHRF1 PE=1 SV=1 - [UHRF1\_HUMAN]  
Q95429 BAG family molecular chaperone regulator 4 OS=Homo sapiens GN=BAG4 PE=1 SV=1 - [BAG4\_HUMAN]  
Q9NVQ4 Fas apoptotic inhibitory molecule 1 OS=Homo sapiens GN=FAIM1 PE=1 SV=1 - [FAIM1\_HUMAN]  
Q8N684 Cleavage and polyadenylation specificity factor subunit 7 OS=Homo sapiens GN=CPSF7 PE=1 SV=1 - [CPSF7\_HUMAN]  
Q116630 Cleavage and polyadenylation specificity factor subunit 6 OS=Homo sapiens GN=CPSF6 PE=1 SV=2 - [CPSF6\_HUMAN]  
Q92989 Polyribonucleotide 5'-hydroxyl-kinase Clp1 OS=Homo sapiens GN=CLP1 PE=1 SV=1 - [CLP1\_HUMAN]  
Q7L1Q6 Basic leucine zipper and W2 domain-containing protein 1 OS=Homo sapiens GN=BZW1 PE=1 SV=1 - [BZW1\_HUMAN]  
Q86V58 Protein Hook homolog 3 OS=Homo sapiens GN=HOOK3 PE=1 SV=2 - [HOOK3\_HUMAN]  
Q9Y6E2 Basic leucine zipper and W2 domain-containing protein 2 OS=Homo sapiens GN=BZW2 PE=1 SV=1 - [BZW2\_HUMAN]  
Q29865 HLA class I histocompatibility antigen, Cw-18 alpha chain OS=Homo sapiens GN=HLA-C PE=1 SV=1 - [IC18\_HUMAN]  
P55196 Afadin OS=Homo sapiens GN=MLLT4 PE=1 SV=3 - [AFAD\_HUMAN]  
Q9NRF8 CTP synthase 2 OS=Homo sapiens GN=CTPS2 PE=1 SV=1 - [PYRG2\_HUMAN]  
Q15910 Histone-lysine N-methyltransferase EZH2 OS=Homo sapiens GN=EZH2 PE=1 SV=2 - [EZH2\_HUMAN]  
P39748 Flap endonuclease 1 OS=Homo sapiens GN=FEN1 PE=1 SV=1 - [FEN1\_HUMAN]  
Q774Q2 HEAT repeat-containing protein 3 OS=Homo sapiens GN=HEATR3 PE=1 SV=2 - [HEAT3\_HUMAN]  
Q9H3N1 Thiodorexin-related transmembrane protein 1 OS=Homo sapiens GN=TMX1 PE=1 SV=1 - [TMX1\_HUMAN]  
Q96PE5 DAZ-associated protein 1 OS=Homo sapiens GN=DAZAP1 PE=1 SV=1 - [DAZP1\_HUMAN]  
Q75874 Isocitrate dehydrogenase [NADP] cytoplasmic OS=Homo sapiens GN=IDH1 PE=1 SV=2 - [IDHC\_HUMAN]  
P10644 cAMP-dependent protein kinase type I-alpha regulatory subunit OS=Homo sapiens GN=PRKARIA PE=1 SV=1 - [KAPO\_HUMAN]  
Q00266 S-adenosylmethionine synthase isoform type-1 OS=Homo sapiens GN=MAT1A PE=1 SV=2 - [METK1\_HUMAN]  
P35659 Protein DEK OS=Homo sapiens GN=DEK PE=1 SV=1 - [DEK\_HUMAN]  
Q71RC2 La-related protein 4 OS=Homo sapiens GN=LARP4 PE=1 SV=3 - [LARP4\_HUMAN]  
Q9NSV4 Protein diaphanous homolog 3 OS=Homo sapiens GN=D1APH3 PE=1 SV=4 - [DIAP3\_HUMAN]  
Q9UBU8 Mortality factor 4-like protein 1 OS=Homo sapiens GN=MORF4L1 PE=1 SV=2 - [MO4L1\_HUMAN]  
Q95905 Protein SGT1 OS=Homo sapiens GN=SGT1 PE=1 SV=1 - [SGT1\_HUMAN]  
Q9H4L7 SWI/SNF-related matrix-associated actin-dependent regulator of chromatin subfamily A containing DEAD/His box 1 OS=Homo sapiens GN=SMARCAD1 PE=1 SV=2 - [SMRCD\_HUMAN]  
Q7L5Y9 Macrophage erythroblast attachment OS=Homo sapiens GN=MAEA PE=1 SV=1 - [MAEA\_HUMAN]  
Q99986 Serine/threonine-protein kinase VRK1 OS=Homo sapiens GN=VRK1 PE=1 SV=1 - [VRK1\_HUMAN]  
Q14457 Beclin-1 OS=Homo sapiens GN=BECN1 PE=1 SV=2 - [BECN1\_HUMAN]  
Q15417 Calponin-3 OS=Homo sapiens GN=CNN3 PE=1 SV=1 - [CNN3\_HUMAN]  
Q6PJ19 WD repeat-containing protein 59 OS=Homo sapiens GN=WDR59 PE=1 SV=2 - [WDR59\_HUMAN]  
Q9Y2T1 Nischarin OS=Homo sapiens GN=NISCH PE=1 SV=3 - [NISCH\_HUMAN]  
Q9Y2K7 Lysine-specific demethylase 2A OS=Homo sapiens GN=KDM2A PE=1 SV=3 - [KDM2A\_HUMAN]  
P29323 Ephrin type-B receptor 2 OS=Homo sapiens GN=EPHB2 PE=1 SV=5 - [EPHB2\_HUMAN]  
Q75891 Cytosolic 10-formyltetrahydrofolate dehydrogenase OS=Homo sapiens GN=ALDH1L1 PE=1 SV=2 - [AL1L1\_HUMAN]  
P53004 Biliverdin reductase A OS=Homo sapiens GN=BLVRA PE=1 SV=2 - [BIEA\_HUMAN]  
P16333 Cytoplasmic protein NCK1 OS=Homo sapiens GN=NCK1 PE=1 SV=1 - [NCK1\_HUMAN]  
Q5GLZ8 Probable E3 ubiquitin-protein ligase HERC4 OS=Homo sapiens GN=HERC4 PE=1 SV=1 - [HERC4\_HUMAN]  
Q9NZB2 Constitutive coactivator of PPAR-gamma-like protein 1 OS=Homo sapiens GN=FAM120A PE=1 SV=2 - [F120A\_HUMAN]  
Q96Q08 Exportin-6 OS=Homo sapiens GN=XP06 PE=1 SV=1 - [XP06\_HUMAN]  
Q9UIDY4 DnaJ homolog subfamily B member 4 OS=Homo sapiens GN=DNAJB4 PE=1 SV=1 - [DNJB4\_HUMAN]  
P20645 Cation-dependent mannose-6-phosphate receptor OS=Homo sapiens GN=MGPR PE=1 SV=1 - [MPRD\_HUMAN]  
Q86WB0 Nuclear-interacting partner of ALK OS=Homo sapiens GN=ZC3HC1 PE=1 SV=1 - [NIPA\_HUMAN]  
Q93034 Cullin-5 OS=Homo sapiens GN=CUL5 PE=1 SV=4 - [CUL5\_HUMAN]  
Q96KP4 Cytosolic non-specific dipeptidase OS=Homo sapiens GN=CNDP2 PE=1 SV=2 - [CNDP2\_HUMAN]  
Q96H20 Vacuolar-sorting protein SNF8 OS=Homo sapiens GN=SNF8 PE=1 SV=1 - [SNF8\_HUMAN]  
Q9C0I1 Myotubularin-related protein 12 OS=Homo sapiens GN=MTMR12 PE=1 SV=2 - [MTMRC\_HUMAN]  
P61758 Prefoldin subunit 3 OS=Homo sapiens GN=VBP1 PE=1 SV=3 - [PPFD3\_HUMAN]  
Q969H6 Ribonuclease P/MRP protein subunit POP5 OS=Homo sapiens GN=POP5 PE=1 SV=1 - [POP5\_HUMAN]  
Q14936 Peripheral plasma membrane protein CASK OS=Homo sapiens GN=CASK PE=1 SV=3 - [CSKP\_HUMAN]  
P10398 Serine/threonine-protein kinase A-Raf OS=Homo sapiens GN=ARAF PE=1 SV=2 - [ARAF\_HUMAN]  
Q13042 Cell division cycle protein 16 homolog OS=Homo sapiens GN=CDC16 PE=1 SV=2 - [CDC16\_HUMAN]  
Q81WY4 Signal peptide, CUB and EGF-like domain-containing protein 1 OS=Homo sapiens GN=SCUBE1 PE=1 SV=3 - [SCUB1\_HUMAN]  
Q9Y6E0 Serine/threonine-protein kinase 24 OS=Homo sapiens GN=STK24 PE=1 SV=1 - [STK24\_HUMAN]  
P55263 Adenosine kinase OS=Homo sapiens GN=ADK PE=1 SV=2 - [ADK\_HUMAN]  
P11388 DNA topoisomerase 2-alpha OS=Homo sapiens GN=TOP2A PE=1 SV=3 - [TOP2A\_HUMAN]  
P14735 Insulin-degrading enzyme OS=Homo sapiens GN=IDE PE=1 SV=4 - [IDE\_HUMAN]  
P61599 N-alpha-acetyltransferase 20 OS=Homo sapiens GN=NAA20 PE=1 SV=1 - [NAA20\_HUMAN]  
P41743 Protein kinase C iota type OS=Homo sapiens GN=PRKCI PE=1 SV=2 - [KPCI\_HUMAN]  
Q86U70 LIM domain-binding protein 1 OS=Homo sapiens GN=LDB1 PE=1 SV=2 - [LDB1\_HUMAN]  
Q15127 Secretory carrier-associated membrane protein 2 OS=Homo sapiens GN=SCAMP2 PE=1 SV=2 - [SCAMP2\_HUMAN]  
Q60294 tRNA wobble-synthesizing protein 4 OS=Homo sapiens GN=LMT2 PE=1 SV=3 - [TYW4\_HUMAN]  
Q9JZ28 Aldo-keto reductase family 1 member B15 OS=Homo sapiens GN=AKR1B15 PE=1 SV=2 - [AK1B15\_HUMAN]  
Q14773 Tripeptidyl-peptidase 1 OS=Homo sapiens GN=TPP1 PE=1 SV=2 - [TPP1\_HUMAN]

P11274 Breakpoint cluster region protein OS=Homo sapiens GN=BCR PE=1 SV=2 - [BCR\_HUMAN]  
Q2NKKX DNA excision repair protein ERCC-6-like OS=Homo sapiens GN=ERCC6L PE=1 SV=1 - [ERCC6L\_HUMAN]  
Q9BZF3 Oxyesterol-binding protein-related protein 6 OS=Homo sapiens GN=OSBP6 PE=1 SV=1 - [OSBP6\_HUMAN]  
Q5PSV4 Breast cancer metastasis-suppressor 1-like protein OS=Homo sapiens GN=BRMS1L PE=1 SV=2 - [BRMS1L\_HUMAN]  
Q55Y16 Polynucleotide 5'-hydroxyl-kinase NOL9 OS=Homo sapiens GN=NOL9 PE=1 SV=1 - [NOL9\_HUMAN]  
Q9JL40 Aspartyl aminopeptidase OS=Homo sapiens GN=DNPEP PE=1 SV=1 - [DNPEP\_HUMAN]  
Q9Y6W3 Calpain-7 OS=Homo sapiens GN=CAPN7 PE=1 SV=1 - [CAPN7\_HUMAN]  
Q95758 Polypyrimidine tract-binding protein 3 OS=Homo sapiens GN=PTBP3 PE=1 SV=2 - [PTBP3\_HUMAN]  
Q86U44 N6-adenosine-methyltransferase 70 kDa subunit OS=Homo sapiens GN=METTL3 PE=1 SV=2 - [MTA70\_HUMAN]  
Q8NFF5 FAD synthase OS=Homo sapiens GN=FLAD1 PE=1 SV=1 - [FAD1\_HUMAN]  
Q9HCU4 Cadherin EGF LAG seven-pass G-type receptor 2 OS=Homo sapiens GN=CELSR2 PE=1 SV=1 - [CELSR2\_HUMAN]  
Q8W115 Choline transporter-like protein 1 OS=Homo sapiens GN=SLC44A1 PE=1 SV=1 - [CTLI1\_HUMAN]  
Q9HOA0 N-acetyltransferase 10 OS=Homo sapiens GN=NAT10 PE=1 SV=2 - [NAT10\_HUMAN]  
Q96JB5 CDK5 regulatory subunit-associated protein 3 OS=Homo sapiens GN=CDK5RAP3 PE=1 SV=2 - [CK5P3\_HUMAN]  
P01877 Ig alpha-2 chain C region OS=Homo sapiens GN=IGHA2 PE=1 SV=3 - [IGHA2\_HUMAN]  
Q35V69 Mitochondrial 10-formyltetrahydrofolate dehydrogenase OS=Homo sapiens GN=ALDH1L2 PE=1 SV=2 - [AL1L2\_HUMAN]  
Q6P1W4 Fidgetin-like protein 1 OS=Homo sapiens GN=FIGL1 PE=1 SV=2 - [FIGL1\_HUMAN]  
Q562E7 WD repeat-containing protein 81 OS=Homo sapiens GN=WDR81 PE=1 SV=2 - [WDR81\_HUMAN]  
Q9U1W2 Plexin-A1 OS=Homo sapiens GN=PLXNA1 PE=1 SV=3 - [PLXNA1\_HUMAN]  
Q8N201 Integrator complex subunit 1 OS=Homo sapiens GN=INTS1 PE=1 SV=2 - [INT1\_HUMAN]  
Q92688 Acidic leucine-rich nuclear phosphoprotein 32 family member B OS=Homo sapiens GN=ANP32B PE=1 SV=1 - [AN32B\_HUMAN]  
P52306 Rap1 GTPase-GDP dissociation stimulator 1 OS=Homo sapiens GN=RAP1GDS1 PE=1 SV=3 - [GDS1\_HUMAN]  
Q96LB3 Intraflagellar transport protein 74 homolog OS=Homo sapiens GN=IFT74 PE=1 SV=1 - [IFT74\_HUMAN]  
Q96PE3 Type I inositol 3,4-bisphosphate 4-phosphatase OS=Homo sapiens GN=INPP4A PE=1 SV=1 - [INP4A\_HUMAN]  
Q13362 Serine/threonine-protein phosphatase 2A 56 kDa regulatory subunit gamma isoform OS=Homo sapiens GN=PPP2R5C PE=1 SV=3 - [2A5G\_HUMAN]  
Q9BRX2 Protein pelota homolog OS=Homo sapiens GN=PELO PE=1 SV=2 - [PELO\_HUMAN]  
Q13496 Myotubularin OS=Homo sapiens GN=MTM1 PE=1 SV=2 - [MTM1\_HUMAN]  
Q15904 V-type proton ATPase subunit S1 OS=Homo sapiens GN=ATP6A1 PE=1 SV=2 - [VAS1\_HUMAN]  
Q9UGM3 Deleted in malignant brain tumors 1 protein OS=Homo sapiens GN=DMBT1 PE=1 SV=2 - [DMBT1\_HUMAN]  
Q16186 Proteasomal ubiquitin receptor ADRM1 OS=Homo sapiens GN=ADRM1 PE=1 SV=2 - [ADRM1\_HUMAN]  
Q95747 Serine/threonine-protein kinase OSR1 OS=Homo sapiens GN=OSR1 PE=1 SV=1 - [OSR1\_HUMAN]  
P20023 Complement receptor type 2 OS=Homo sapiens GN=CR2 PE=1 SV=2 - [CR2\_HUMAN]  
Q6P3X3 Tetratricopeptide repeat protein 27 OS=Homo sapiens GN=TTCT27 PE=1 SV=1 - [TTCT27\_HUMAN]  
Q95857 Tetraspanin-13 OS=Homo sapiens GN=TPAN13 PE=2 SV=1 - [TSN13\_HUMAN]  
P17948 Vascular endothelial growth factor receptor 1 OS=Homo sapiens GN=FLT1 PE=1 SV=2 - [VGFRI\_HUMAN]  
Q8TD16 Protein bicaudal D homolog 2 OS=Homo sapiens GN=BICD2 PE=1 SV=1 - [BICD2\_HUMAN]  
Q43542 DNA repair protein XRCC3 OS=Homo sapiens GN=XRCC3 PE=1 SV=1 - [XRCC3\_HUMAN]  
Q14498 RNA-binding protein 39 OS=Homo sapiens GN=RBM39 PE=1 SV=2 - [RBM39\_HUMAN]  
Q504Q3 PAB-dependent poly(A)-specific ribonuclease subunit PAN2 OS=Homo sapiens GN=PAN2 PE=1 SV=3 - [PAN2\_HUMAN]  
Q43570 Carbonic anhydrase 12 OS=Homo sapiens GN=CA12 PE=1 SV=1 - [CAH12\_HUMAN]  
Q8TAA9 Vang-like protein 1 OS=Homo sapiens GN=VANGL1 PE=1 SV=1 - [VANG1\_HUMAN]  
Q75674 TOM1-like protein 1 OS=Homo sapiens GN=TOM1L1 PE=1 SV=2 - [TM1L1\_HUMAN]  
Q92917 G patch domain and KOW motifs-containing protein OS=Homo sapiens GN=GPKOW PE=1 SV=2 - [GPKOW\_HUMAN]  
Q9H3G5 Probable serine carboxypeptidase CPVL OS=Homo sapiens GN=CPVL PE=1 SV=2 - [CPVL\_HUMAN]  
Q9Y6K9 NF-kappa-B essential modulator OS=Homo sapiens GN=IKBK G PE=1 SV=2 - [NEMO\_HUMAN]  
Q00587 Cdc42 effector protein 1 OS=Homo sapiens GN=CDC42EP1 PE=1 SV=1 - [BOR65\_HUMAN]  
Q9Y2S6 Translation machinery-associated protein 7 OS=Homo sapiens GN=TMA7 PE=1 SV=1 - [TMA7\_HUMAN]  
P04049 RAF proto-oncogene serine/threonine-protein kinase OS=Homo sapiens GN=RAF1 PE=1 SV=1 - [RAF1\_HUMAN]  
P49406 39S ribosomal protein L19, mitochondrial OS=Homo sapiens GN=MRPL19 PE=1 SV=2 - [RM19\_HUMAN]  
Q81WF2 FAD-dependent oxidoreductase domain-containing protein 2 OS=Homo sapiens GN=FOXRED2 PE=1 SV=1 - [FXRD2\_HUMAN]  
Q96HR3 Mediator of RNA polymerase II transcription subunit 30 OS=Homo sapiens GN=MED30 PE=1 SV=1 - [MED30\_HUMAN]  
Q9BUK6 Protein misato homolog 1 OS=Homo sapiens GN=MSTO1 PE=1 SV=1 - [MSTO1\_HUMAN]  
Q9HTB4 Histone-lysine N-methyltransferase SMYD3 OS=Homo sapiens GN=SMYD3 PE=1 SV=4 - [SMYD3\_HUMAN]  
Q9HB63 Netrin-4 OS=Homo sapiens GN=NTN4 PE=1 SV=2 - [NET4\_HUMAN]  
Q8NC42 E3 ubiquitin-protein ligase RNF149 OS=Homo sapiens GN=RNF149 PE=2 SV=2 - [RNF149\_HUMAN]  
Q570F9 Coiled-coil and C2 domain-containing protein 1B OS=Homo sapiens GN=CC2D1B PE=1 SV=1 - [C2D1B\_HUMAN]  
Q9UJ41 Rab5 GDP/GTP exchange factor OS=Homo sapiens GN=RABGEF1 PE=1 SV=2 - [RAB5\_HUMAN]  
Q86XP3 ATP-dependent RNA helicase DDX42 OS=Homo sapiens GN=DDX42 PE=1 SV=1 - [DDX42\_HUMAN]  
Q14578 Citron Rho-interacting kinase OS=Homo sapiens GN=CIT PE=1 SV=2 - [CTRO\_HUMAN]  
Q9H814 Phosphorylated adapter RNA export protein OS=Homo sapiens GN=PHAX PE=1 SV=1 - [PHAX\_HUMAN]  
P62487 DNA-directed RNA polymerase II subunit RPB7 OS=Homo sapiens GN=POLR2G PE=1 SV=1 - [RPB7\_HUMAN]  
Q32P41 tRNA (guanine(37)-N1)-methyltransferase OS=Homo sapiens GN=TRMT5 PE=1 SV=2 - [TRM5\_HUMAN]  
Q15738 Sterol-4-alpha-carboxylate 3-dehydrogenase, decarboxylating OS=Homo sapiens GN=NSDHL PE=1 SV=2 - [NSDHL\_HUMAN]  
Q9Y240 C-type lectin domain family 11 member A OS=Homo sapiens GN=CLEC11A PE=1 SV=1 - [CLC11\_HUMAN]  
P19022 Cadherin-2 OS=Homo sapiens GN=CDH2 PE=1 SV=4 - [CADH2\_HUMAN]  
P82094 TATA element modulatory factor OS=Homo sapiens GN=TMF1 PE=1 SV=2 - [TMF1\_HUMAN]  
Q15173 Membrane-associated progesterone receptor component 2 OS=Homo sapiens GN=PGRC2 PE=1 SV=1 - [PGRC2\_HUMAN]  
Q16563 Synaptophysin-like protein 1 OS=Homo sapiens GN=SVPL1 PE=1 SV=1 - [SVPL1\_HUMAN]  
Q6ZRP7 Sulfhydryl oxidase 2 OS=Homo sapiens GN=QSOX2 PE=1 SV=3 - [QSOX2\_HUMAN]  
Q60244 Mediator of RNA polymerase II transcription subunit 14 OS=Homo sapiens GN=MED14 PE=1 SV=2 - [MED14\_HUMAN]  
P01344 Insulin-like growth factor II OS=Homo sapiens GN=IGF2 PE=1 SV=1 - [IGF2\_HUMAN]  
Q8WV73 Trafficking protein particle complex subunit 12 OS=Homo sapiens GN=TRAPP12 PE=1 SV=3 - [TPC12\_HUMAN]  
Q04726 Transducin-like enhancer protein 3 OS=Homo sapiens GN=TLE3 PE=1 SV=2 - [TLE3\_HUMAN]  
Q16877 6-phosphofructo-2-kinase/fructose-2,6-bisphosphatase 4 OS=Homo sapiens GN=PFKFB4 PE=2 SV=6 - [P264\_HUMAN]  
Q14981 TATA-binding protein-associated factor 172 OS=Homo sapiens GN=BTAF1 PE=1 SV=2 - [BTAF1\_HUMAN]  
Q15530 3-phosphoinositide-dependent protein kinase 1 OS=Homo sapiens GN=PDPK1 PE=1 SV=1 - [PDPK1\_HUMAN]  
Q9UPN7 Serine/threonine-protein phosphatase 6 regulatory subunit 1 OS=Homo sapiens GN=PPP6R1 PE=1 SV=5 - [PP6R1\_HUMAN]  
P04156 Major prion protein OS=Homo sapiens GN=PRNP PE=1 SV=1 - [PRIO\_HUMAN]  
Q96P47 Art-GAP with GTPase, ANK repeat and PH domain-containing protein 3 OS=Homo sapiens GN=AGAP3 PE=1 SV=2 - [AGAP3\_HUMAN]  
Q66VQ0 Ral GTPase-activating protein subunit alpha-1 OS=Homo sapiens GN=RALGAP1 PE=1 SV=1 - [RGA1\_HUMAN]  
Q9H9C1 Spermatogenesis-defective protein 39 homolog OS=Homo sapiens GN=VIPAS39 PE=1 SV=1 - [SPE39\_HUMAN]  
Q96P20 Pseudouridylylase synthase 7 homolog OS=Homo sapiens GN=PUS7 PE=1 SV=2 - [PUS7\_HUMAN]  
Q99567 Nuclear pore complex protein Nup88 OS=Homo sapiens GN=NUP88 PE=1 SV=2 - [NUP88\_HUMAN]  
P36542 ATP synthase subunit gamma, mitochondrial OS=Homo sapiens GN=ATP5C1 PE=1 SV=1 - [ATPG\_HUMAN]  
Q9Y5X2 Sorting nexin-8 OS=Homo sapiens GN=SNX8 PE=1 SV=1 - [SNX8\_HUMAN]  
Q9HD45 Transmembrane 9 superfamily member 3 OS=Homo sapiens GN=TM9SF3 PE=1 SV=2 - [TM9S3\_HUMAN]  
Q9P2E5 Chondroitin sulfate glucuronyltransferase OS=Homo sapiens GN=CHPF2 PE=2 SV=2 - [CHPF2\_HUMAN]  
Q9P0U4 CXXC-type zinc finger protein 1 OS=Homo sapiens GN=CXXC1 PE=1 SV=2 - [CXXC1\_HUMAN]  
Q16881 Thioredoxin reductase 1, cytoplasmic OS=Homo sapiens GN=TXNRD1 PE=1 SV=3 - [TRXR1\_HUMAN]  
Q15276 Rab GTPase-binding effector protein 1 OS=Homo sapiens GN=RABEP1 PE=1 SV=2 - [RABE1\_HUMAN]  
Q43818 U3 small nucleolar RNA-interacting protein 2 OS=Homo sapiens GN=RRP9 PE=1 SV=1 - [U3IP2\_HUMAN]  
Q7L014 Probable ATP-dependent RNA helicase DDX46 OS=Homo sapiens GN=DDX46 PE=1 SV=2 - [DDX46\_HUMAN]  
Q9H2P9 Dipthine synthase OS=Homo sapiens GN=DPH5 PE=1 SV=2 - [DPH5\_HUMAN]  
Q00442 RNA 3'-terminal phosphate cyclase OS=Homo sapiens GN=RTCA PE=1 SV=1 - [RTCA\_HUMAN]  
Q9Y5Q9 General transcription factor 3C polypeptide 3 OS=Homo sapiens GN=GTF3C3 PE=1 SV=1 - [TF3C3\_HUMAN]  
Q13049 E3 ubiquitin-protein ligase TRIM32 OS=Homo sapiens GN=TRIM32 PE=1 SV=2 - [TRI32\_HUMAN]  
Q00506 Serine/threonine-protein kinase 25 OS=Homo sapiens GN=STRK25 PE=1 SV=1 - [STRK25\_HUMAN]  
Q15043 Zinc transporter ZIP14 OS=Homo sapiens GN=SLC39A14 PE=1 SV=3 - [S39AE\_HUMAN]  
Q15126 Secretory carrier-associated membrane protein 1 OS=Homo sapiens GN=SCAMP1 PE=1 SV=2 - [SCAMP1\_HUMAN]  
Q9BQ90 Kelch domain-containing protein 3 OS=Homo sapiens GN=KLHD3 PE=2 SV=1 - [KLDC3\_HUMAN]  
Q05086 Ubiquitin-protein ligase E3A OS=Homo sapiens GN=UBE3A PE=1 SV=4 - [UBE3A\_HUMAN]  
Q9H497 Torsin-3A OS=Homo sapiens GN=TOR3A PE=1 SV=1 - [TOR3A\_HUMAN]  
Q14776 Transcription elongation regulator 1 OS=Homo sapiens GN=TCERG1 PE=1 SV=2 - [TCRG1\_HUMAN]  
Q9HOH0 Integrator complex subunit 2 OS=Homo sapiens GN=INTS2 PE=1 SV=2 - [INT2\_HUMAN]  
Q14185 Dedicator of cytokinesis protein 1 OS=Homo sapiens GN=DOCK1 PE=1 SV=2 - [DOCK1\_HUMAN]  
Q9HB40 Retinoid-inducible serine carboxypeptidase OS=Homo sapiens GN=SCPEP1 PE=1 SV=1 - [RISC\_HUMAN]  
P08572 Collagen alpha-2(IV) chain OS=Homo sapiens GN=COL4A2 PE=1 SV=4 - [CO4A2\_HUMAN]  
Q95239 Chromosome-associated kinesin KIF4A OS=Homo sapiens GN=KIF4A PE=1 SV=3 - [KIF4A\_HUMAN]  
Q95453 Poly(A)-specific ribonuclease PARN OS=Homo sapiens GN=PARN PE=1 SV=1 - [PARN\_HUMAN]  
Q81WA5 Choline transporter-like protein 2 OS=Homo sapiens GN=SLC44A2 PE=1 SV=3 - [CTL2\_HUMAN]  
Q9BQ58 FYVE and coiled-coil domain-containing protein 1 OS=Homo sapiens GN=FYCO1 PE=1 SV=3 - [FYCO1\_HUMAN]  
Q9P2L0 WD repeat-containing protein 35 OS=Homo sapiens GN=WDR35 PE=1 SV=3 - [WDR35\_HUMAN]  
P08962 CD63 antigen OS=Homo sapiens GN=CD63 PE=1 SV=2 - [CD63\_HUMAN]  
Q8W01 tRNA-splicing endonuclease subunit Sen15 OS=Homo sapiens GN=TSN15 PE=1 SV=1 - [SEN15\_HUMAN]  
Q75695 Protein XRP2 OS=Homo sapiens GN=RP2 PE=1 SV=4 - [XRP2\_HUMAN]

Q01968 Inositol polyphosphate 5-phosphatase OCRL-1 OS=Homo sapiens GN=OCRL PE=1 SV=3 - [OCRL\_HUMAN]  
 Q9UNY4 Transcription termination factor 2 OS=Homo sapiens GN=TTF2 PE=1 SV=2 - [TTF2\_HUMAN]  
 Q81207 Ankyrin repeat domain-containing protein 13A OS=Homo sapiens GN=ANKRD13A PE=1 SV=3 - [ANK13A\_HUMAN]  
 Q9Y297 F-box/WD repeat-containing protein 1A OS=Homo sapiens GN=BTRC PE=1 SV=1 - [FBW1A\_HUMAN]  
 Q94967 WD repeat-containing protein 47 OS=Homo sapiens GN=WDR47 PE=1 SV=1 - [WDR47\_HUMAN]  
 Q04724 Transducin-like enhancer protein 1 OS=Homo sapiens GN=TLE1 PE=1 SV=2 - [TLE1\_HUMAN]  
 Q9NVR2 Integrator complex subunit 10 OS=Homo sapiens GN=INTS10 PE=1 SV=2 - [INT10\_HUMAN]  
 P17066 Heat shock 70 kDa protein 6 OS=Homo sapiens GN=HSPA6 PE=1 SV=2 - [HSP76\_HUMAN]  
 Q817H2 5'-3' exoribonuclease 1 OS=Homo sapiens GN=XRN1 PE=1 SV=1 - [XRN1\_HUMAN]  
 Q9NVL9 Tropomodulin-3 OS=Homo sapiens GN=TMOD3 PE=1 SV=1 - [TMOD3\_HUMAN]  
 Q81YS1 Peptidase M20 domain-containing protein 2 OS=Homo sapiens GN=PM20D2 PE=1 SV=2 - [P20D2\_HUMAN]  
 Q9BR76 Coronin-1B OS=Homo sapiens GN=COR1B PE=1 SV=1 - [COR1B\_HUMAN]  
 P46019 Phosphorylase b kinase regulatory subunit alpha, liver isoform OS=Homo sapiens GN=PKA2 PE=1 SV=1 - [KPB2\_HUMAN]  
 Q13439 Golgin subfamily A member 4 OS=Homo sapiens GN=GOLGA4 PE=1 SV=1 - [GOGA4\_HUMAN]  
 Q9Y2J2 Band 4.1-like protein 3 OS=Homo sapiens GN=EPB41L3 PE=1 SV=2 - [E41L3\_HUMAN]  
 Q14624 Inter-alpha-trypsin inhibitor heavy chain H4 OS=Homo sapiens GN=ITIHA PE=1 SV=4 - [ITIHA\_HUMAN]  
 P50895 Basal cell adhesion molecule OS=Homo sapiens GN=BCAM PE=1 SV=2 - [BCAM\_HUMAN]  
 Q9HAC8 Ubiquitin domain-containing protein 1 OS=Homo sapiens GN=UBTD1 PE=1 SV=1 - [UBTD1\_HUMAN]  
 U15357 Phosphatidylinositol 3,4,5-trisphosphate 5-phosphatase 2 OS=Homo sapiens GN=INPPL1 PE=1 SV=2 - [SHIP2\_HUMAN]  
 Q9UK97 F-box only protein 9 OS=Homo sapiens GN=FBXO9 PE=1 SV=1 - [FBX9\_HUMAN]  
 Q75688 Protein phosphatase 1B OS=Homo sapiens GN=PPM1B PE=1 SV=1 - [PPM1B\_HUMAN]  
 Q14669 E3 ubiquitin-protein ligase TRIP12 OS=Homo sapiens GN=TRIP12 PE=1 SV=1 - [TRIP12\_HUMAN]  
 Q9BZK3 Putative nascent polypeptide-associated complex subunit alpha-like protein OS=Homo sapiens GN=NACAP1 PE=5 SV=1 - [NAC1\_HUMAN]  
 P50993 Sodium/potassium transporting ATPase subunit alpha-2 OS=Homo sapiens GN=ATP1A2 PE=1 SV=1 - [AT1A2\_HUMAN]  
 Q9UM47 Neurogenic locus notch homolog protein 3 OS=Homo sapiens GN=NOTCH3 PE=1 SV=2 - [NOTC3\_HUMAN]  
 Q76003 Glutaredoxin-3 OS=Homo sapiens GN=GLRX3 PE=1 SV=2 - [GLRX3\_HUMAN]  
 Q9NY47 Voltage-dependent calcium channel subunit alpha-2/delta-2 OS=Homo sapiens GN=CACNA2D2 PE=1 SV=2 - [CA2D2\_HUMAN]  
 Q8NCE0 tRNA-splicing endonuclease subunit Sen2 OS=Homo sapiens GN=TSEN2 PE=1 SV=2 - [SEN2\_HUMAN]  
 P09497 Clathrin light chain B OS=Homo sapiens GN=CLTB PE=1 SV=1 - [CLCB\_HUMAN]  
 P78324 Tyrosine-protein phosphatase non-receptor type substrate 1 OS=Homo sapiens GN=SHPS1 PE=1 SV=2 - [SHPS1\_HUMAN]  
 Q9H6R4 Nucleolar protein 6 OS=Homo sapiens GN=NOL6 PE=1 SV=2 - [NOL6\_HUMAN]  
 Q4V328 GRP1-associated protein 1 OS=Homo sapiens GN=GRIP1 PE=1 SV=1 - [GRAP1\_HUMAN]  
 O95155 Ubiquitin conjugation factor E4 B OS=Homo sapiens GN=UBE4B PE=1 SV=1 - [UBE4B\_HUMAN]  
 Q81W35 Centrosomal protein of 97 kDa OS=Homo sapiens GN=CEP97 PE=1 SV=1 - [CEP97\_HUMAN]  
 Q9NY35 Claudin domain-containing protein 1 OS=Homo sapiens GN=CLDN1 PE=1 SV=1 - [CLDN1\_HUMAN]  
 Q9H8T0 AKT-interacting protein OS=Homo sapiens GN=AKTIP PE=1 SV=1 - [AKTIP\_HUMAN]  
 Q9Y6R4 Mitogen-activated protein kinase kinase 4 OS=Homo sapiens GN=MAP3K4 PE=1 SV=2 - [M3K4\_HUMAN]  
 Q7Z739 YTH domain-containing family protein 3 OS=Homo sapiens GN=YTHDF3 PE=1 SV=1 - [YTHD3\_HUMAN]  
 Q13017 Rho GTPase-activating protein 5 OS=Homo sapiens GN=ARHGAP5 PE=1 SV=2 - [RHG05\_HUMAN]  
 Q15642 Cdc42-interacting protein 4 OS=Homo sapiens GN=TRIP10 PE=1 SV=3 - [CIP4\_HUMAN]  
 Q14012 Calcium/calmodulin-dependent protein kinase type 1 OS=Homo sapiens GN=CMK1 PE=1 SV=1 - [KCC1A\_HUMAN]  
 P62877 E3 ubiquitin-protein ligase RBX1 OS=Homo sapiens GN=RBX1 PE=1 SV=1 - [RBX1\_HUMAN]  
 Q75113 NEDD4-binding protein 1 OS=Homo sapiens GN=N4BP1 PE=1 SV=4 - [N4BP1\_HUMAN]  
 O94822 E3 ubiquitin-protein ligase listerin OS=Homo sapiens GN=LTN1 PE=1 SV=6 - [LTN1\_HUMAN]  
 P35443 Thrombospondin-4 OS=Homo sapiens GN=THBS4 PE=1 SV=2 - [TSP4\_HUMAN]  
 O14976 Cyclin-G-associated kinase OS=Homo sapiens GN=GAK PE=1 SV=2 - [GAK\_HUMAN]  
 Q92574 Hamartin OS=Homo sapiens GN=TS1 PE=1 SV=2 - [TS1\_HUMAN]  
 O15072 A disintegrin and metalloproteinase with thrombospondin motifs 3 OS=Homo sapiens GN=ADAMTS3 PE=2 SV=4 - [ATS3\_HUMAN]  
 P06732 Creatine kinase M-type OS=Homo sapiens GN=CKM PE=1 SV=2 - [KCRM\_HUMAN]  
 Q13641 Trophoblast glycoprotein OS=Homo sapiens GN=TPBG PE=1 SV=1 - [TPBG\_HUMAN]  
 Q13188 Serine/threonine-protein kinase 3 OS=Homo sapiens GN=STK3 PE=1 SV=2 - [STK3\_HUMAN]  
 Q06010 Protein diaphanous homolog 1 OS=Homo sapiens GN=DIAPH1 PE=1 SV=2 - [DIAP1\_HUMAN]  
 P00738 Haptoglobin OS=Homo sapiens GN=HP PE=1 SV=1 - [HPT\_HUMAN]  
 Q9Y6D9 Mitotic spindle assembly checkpoint protein MAD1 OS=Homo sapiens GN=MAD1L1 PE=1 SV=2 - [MD1L1\_HUMAN]  
 P42898 Methylene tetrahydrofolate reductase OS=Homo sapiens GN=MTHFR PE=1 SV=3 - [MTHR\_HUMAN]  
 Q13247 Serine/arginine-rich splicing factor 6 OS=Homo sapiens GN=SRSF6 PE=1 SV=2 - [SRSF6\_HUMAN]  
 P38571 Lysosomal acid lipase/cholesterol ester hydrolase OS=Homo sapiens GN=LIPA PE=1 SV=2 - [LICH\_HUMAN]  
 Q15036 Sorting nexin-17 OS=Homo sapiens GN=SNX17 PE=1 SV=1 - [SNX17\_HUMAN]  
 O75886 Signal transducing adapter molecule 2 OS=Homo sapiens GN=STAM2 PE=1 SV=1 - [STAM2\_HUMAN]  
 P10619 Lysosomal protective protein OS=Homo sapiens GN=CTSA PE=1 SV=2 - [PPBG\_HUMAN]  
 Q6Z9Q5 Protein MMS22-like OS=Homo sapiens GN=MMS22L PE=1 SV=3 - [MMS22\_HUMAN]  
 P54105 Methylosome subunit p1Cln OS=Homo sapiens GN=CLNS1A PE=1 SV=1 - [ICLN\_HUMAN]  
 Q9UEW8 STE20/SPS1-related proline-alanine-rich protein kinase OS=Homo sapiens GN=STK39 PE=1 SV=3 - [STK39\_HUMAN]  
 Q9Y5P4 Collagen type IV alpha-3-binding protein OS=Homo sapiens GN=COL4A3BP PE=1 SV=1 - [C43BP\_HUMAN]  
 O14656 Torsin-1A OS=Homo sapiens GN=TOR1A PE=1 SV=1 - [TOR1A\_HUMAN]  
 P61956 Small ubiquitin-related modifier 2 OS=Homo sapiens GN=SUMO2 PE=1 SV=3 - [SUMO2\_HUMAN]  
 Q9Y4A5 Transformation/transcription domain-associated protein OS=Homo sapiens GN=TRRAP PE=1 SV=3 - [TRRAP\_HUMAN]  
 Q86Y57 C2 domain-containing protein 5 OS=Homo sapiens GN=C2CD5 PE=1 SV=1 - [C2CD5\_HUMAN]  
 Q86UX7 Fermitin family homolog 3 OS=Homo sapiens GN=FERMT3 PE=1 SV=1 - [URP2\_HUMAN]  
 Q9Y5J1 U3 small nucleolar RNA-associated protein 18 homolog OS=Homo sapiens GN=UTP18 PE=1 SV=3 - [UTP18\_HUMAN]  
 Q9HCN4 GPN-loop GTPase 1 OS=Homo sapiens GN=GPN1 PE=1 SV=1 - [GPN1\_HUMAN]  
 Q15061 WD repeat-containing protein 43 OS=Homo sapiens GN=WDR43 PE=1 SV=3 - [WDR43\_HUMAN]  
 Q7LBR1 Charged multivesicular body protein 1b OS=Homo sapiens GN=CHMP1B PE=1 SV=1 - [CHM1B\_HUMAN]  
 P48553 Trafficking protein particle complex subunit 10 OS=Homo sapiens GN=TRAPP10 PE=1 SV=2 - [TPC10\_HUMAN]  
 Q08170 Serine/arginine-rich splicing factor 4 OS=Homo sapiens GN=SRSF4 PE=1 SV=2 - [SRSF4\_HUMAN]  
 Q96LA8 Protein arginine N-methyltransferase 6 OS=Homo sapiens GN=PRMT6 PE=1 SV=1 - [ANM6\_HUMAN]  
 P46939 Utrophin OS=Homo sapiens GN=UTRN PE=1 SV=2 - [UTRO\_HUMAN]  
 Q86V21 Acetoacetyl-CoA synthetase OS=Homo sapiens GN=AACS PE=1 SV=1 - [AACS\_HUMAN]  
 Q96EY1 DnaJ homolog subfamily A member 3, mitochondrial OS=Homo sapiens GN=DNAJ3 PE=1 SV=2 - [DNJA3\_HUMAN]  
 P39060 Collagen alpha-1(XVII) chain OS=Homo sapiens GN=COL18A1 PE=1 SV=5 - [COT1A1\_HUMAN]  
 Q8WVM7 Cohesin subunit SA-1 OS=Homo sapiens GN=STAG1 PE=1 SV=3 - [STAG1\_HUMAN]  
 P54764 Ephrin type-A receptor 4 OS=Homo sapiens GN=EPHA4 PE=1 SV=1 - [EPHA4\_HUMAN]  
 Q92609 TBC1 domain family member 5 OS=Homo sapiens GN=TBC1D5 PE=1 SV=1 - [TBCD5\_HUMAN]  
 P46087 Probable 28S rRNA (cytosine(4447)-C(5))-methyltransferase OS=Homo sapiens GN=NOP2 PE=1 SV=2 - [NOP2\_HUMAN]  
 Q8N474 Secreted frizzled-related protein 1 OS=Homo sapiens GN=SFRRP1 PE=1 SV=1 - [SFRRP1\_HUMAN]  
 Q060271 C-Jun-amino-terminal kinase-interacting protein 4 OS=Homo sapiens GN=SPAG9 PE=1 SV=4 - [JIP4\_HUMAN]  
 Q68CQ7 Glycosyltransferase 8 domain-containing protein 1 OS=Homo sapiens GN=GLT8D1 PE=1 SV=2 - [GL8D1\_HUMAN]  
 P30260 Cell division cycle protein 27 homolog OS=Homo sapiens GN=CDC27 PE=1 SV=2 - [CDC27\_HUMAN]  
 Q9ULX3 RNA-binding protein NOB1 OS=Homo sapiens GN=NOB1 PE=1 SV=1 - [NOB1\_HUMAN]  
 Q14999 Cullin-7 OS=Homo sapiens GN=CUL7 PE=1 SV=2 - [CUL7\_HUMAN]  
 Q95980 Reversion-inducing cysteine-rich protein with Kazal motifs OS=Homo sapiens GN=RECK PE=1 SV=1 - [RECK\_HUMAN]  
 Q8N954 G patch domain-containing protein 11 OS=Homo sapiens GN=GPATCH11 PE=1 SV=3 - [GPT11\_HUMAN]  
 Q96HA7 Tonsoku-like protein OS=Homo sapiens GN=TONSL PE=1 SV=2 - [TONSL\_HUMAN]  
 Q95834 Echinoderm microtubule-associated protein-like 2 OS=Homo sapiens GN=EML2 PE=1 SV=1 - [EMAL2\_HUMAN]  
 Q8TEA7 TBC domain-containing protein kinase-like protein OS=Homo sapiens GN=TBCK PE=1 SV=4 - [TBCK\_HUMAN]  
 Q81UE6 Histone H2A type 2-B OS=Homo sapiens GN=HIST2H2AB PE=1 SV=3 - [H2A2E\_HUMAN]  
 Q9H3P7 Golgi resident protein GCP60 OS=Homo sapiens GN=ACBD3 PE=1 SV=4 - [GCP60\_HUMAN]  
 Q9Y639 Neuroligin OS=Homo sapiens GN=NPTN PE=1 SV=2 - [NPTN\_HUMAN]  
 P38159 RNA-binding motif protein, X chromosome OS=Homo sapiens GN=RBMX PE=1 SV=3 - [RBMX\_HUMAN]  
 Q81UD2 ELKS/Rab6-interacting/CAST family member 1 OS=Homo sapiens GN=ERC1 PE=1 SV=1 - [RBG12\_HUMAN]  
 P18084 Integrin beta-5 OS=Homo sapiens GN=ITGB5 PE=1 SV=1 - [ITB5\_HUMAN]  
 Q14789 Golgin subfamily B member 1 OS=Homo sapiens GN=GOLGB1 PE=1 SV=2 - [GOGB1\_HUMAN]  
 P51532 Transcription activator BRG1 OS=Homo sapiens GN=SMARCA4 PE=1 SV=2 - [SMCA4\_HUMAN]  
 Q9Y5A9 YTH domain-containing family protein 2 OS=Homo sapiens GN=YTHDF2 PE=1 SV=2 - [YTHD2\_HUMAN]  
 U15397 Importin-8 OS=Homo sapiens GN=IPO8 PE=1 SV=2 - [IPO8\_HUMAN]  
 P54802 Alpha-N-acetylglucosaminidase OS=Homo sapiens GN=NAGLU PE=1 SV=2 - [ANAG\_HUMAN]  
 Q9Y4J8 Dystrobrevin alpha OS=Homo sapiens GN=DTNA PE=1 SV=2 - [DTNA\_HUMAN]  
 P06746 DNA polymerase beta OS=Homo sapiens GN=POLB PE=1 SV=3 - [DPOLB\_HUMAN]  
 Q86UY6 N-alpha-acetyltransferase 40 OS=Homo sapiens GN=NA40 PE=1 SV=1 - [NA40\_HUMAN]  
 Q6IX19 Nephronectin OS=Homo sapiens GN=NPNT PE=2 SV=3 - [NPNT\_HUMAN]  
 Q7Z2W9 39S ribosomal protein L21, mitochondrial OS=Homo sapiens GN=MRPL21 PE=1 SV=2 - [RM21\_HUMAN]  
 O15164 Transcription intermediary factor 1-alpha OS=Homo sapiens GN=TRIM24 PE=1 SV=3 - [TIF1A\_HUMAN]  
 Q6P996 Pyridoxal-dependent decarboxylase domain-containing protein 1 OS=Homo sapiens GN=PDXD1 PE=1 SV=2 - [PDXD1\_HUMAN]  
 Q8NH99 Atlantin-2 OS=Homo sapiens GN=ATL2 PE=1 SV=2 - [ATLA2\_HUMAN]  
 O94868 F-BAR and double SH3 domains protein 2 OS=Homo sapiens GN=FCHSD2 PE=1 SV=3 - [FCSD2\_HUMAN]

Q9BYJ9 YTH domain-containing family protein 1 OS=Homo sapiens GN=YTHDF1 PE=1 SV=1 - [YTHD1\_HUMAN]  
Q9H078 Caseinolytic peptidase B protein homolog OS=Homo sapiens GN=CLPB PE=1 SV=1 - [CLPB\_HUMAN]  
Q9Y496 Kinesin-like protein KIF3A OS=Homo sapiens GN=KIF3A PE=1 SV=4 - [KIF3A\_HUMAN]  
Q9BZJ0 Crooked neck-like protein 1 OS=Homo sapiens GN=CRNKL1 PE=1 SV=4 - [CRNL1\_HUMAN]  
Q9H1B5 Xylosyltransferase 2 OS=Homo sapiens GN=XYLT2 PE=2 SV=2 - [XYLT2\_HUMAN]  
Q75128 Protein cordon-bleu OS=Homo sapiens GN=COBL PE=1 SV=2 - [COBL\_HUMAN]  
Q96EX3 WD repeat-containing protein 34 OS=Homo sapiens GN=WDR34 PE=1 SV=2 - [WDR34\_HUMAN]  
Q9BWH6 RNA polymerase II-associated protein 1 OS=Homo sapiens GN=RPAP1 PE=1 SV=3 - [RPAP1\_HUMAN]  
Q9Y6L7 Tollid-like protein 2 OS=Homo sapiens GN=TL2 PE=1 SV=1 - [TL2\_HUMAN]  
Q14646 Chromodomain-helicase-DNA-binding protein 1 OS=Homo sapiens GN=CHD1 PE=1 SV=2 - [CHD1\_HUMAN]  
Q9H074 Polyadenylate-binding protein-interacting protein 1 OS=Homo sapiens GN=PAIP1 PE=1 SV=1 - [PAIP1\_HUMAN]  
P09001 39S ribosomal protein L3, mitochondrial OS=Homo sapiens GN=MRPL3 PE=1 SV=1 - [RMO3\_HUMAN]  
P12110 Collagen alpha-2(VI) chain OS=Homo sapiens GN=COL6A2 PE=1 SV=4 - [CO6A2\_HUMAN]  
P15907 Beta-galactoside alpha-2,6-sialyltransferase 1 OS=Homo sapiens GN=ST6GAL1 PE=1 SV=1 - [STAT1\_HUMAN]  
P55081 Microfibrillar-associated protein 1 OS=Homo sapiens GN=MFAP1 PE=1 SV=2 - [MFAP1\_HUMAN]  
Q07960 Rho GTPase-activating protein 1 OS=Homo sapiens GN=ARHGAP1 PE=1 SV=1 - [RHG01\_HUMAN]  
Q99805 Transmembrane 9 superfamily member 2 OS=Homo sapiens GN=TM9SF2 PE=1 SV=1 - [TM9S2\_HUMAN]  
Q94856 Neurofascin OS=Homo sapiens GN=NFASC PE=1 SV=4 - [NFASC\_HUMAN]  
Q86Y76 E3 ubiquitin-protein ligase MIB1 OS=Homo sapiens GN=MIB1 PE=1 SV=1 - [MIB1\_HUMAN]  
Q81WZ6 Bardet-Biedl syndrome 7 protein OS=Homo sapiens GN=BBS7 PE=1 SV=2 - [BBS7\_HUMAN]  
Q9BU60 Mediator of RNA polymerase II transcription subunit 18 OS=Homo sapiens GN=MED18 PE=1 SV=1 - [MED18\_HUMAN]  
Q9HBG6 Intraflagellar transport protein 122 homolog OS=Homo sapiens GN=IFT122 PE=1 SV=2 - [IFT122\_HUMAN]  
Q75146 Huntingtin-interacting protein 1-related protein OS=Homo sapiens GN=HIP1R PE=1 SV=2 - [HIP1R\_HUMAN]  
P15529 Membrane cofactor protein OS=Homo sapiens GN=CD46 PE=1 SV=3 - [MCP\_HUMAN]  
Q81UH3 RNA-binding protein 45 OS=Homo sapiens GN=RBM45 PE=1 SV=1 - [RBM45\_HUMAN]  
Q96EV8 Dysbindin OS=Homo sapiens GN=DTNBP1 PE=1 SV=1 - [DTBP1\_HUMAN]  
Q70CQ2 Ubiquitin carboxyl-terminal hydrolase 34 OS=Homo sapiens GN=USP34 PE=1 SV=2 - [UBP34\_HUMAN]  
Q8TEV9 Smith-Magenis syndrome chromosomal region candidate gene 8 protein OS=Homo sapiens GN=SMCR8 PE=1 SV=2 - [SMCR8\_HUMAN]  
Q9P260 Lis1 domain and HEAT repeat-containing protein KIAA1468 OS=Homo sapiens GN=KIAA1468 PE=1 SV=2 - [K1468\_HUMAN]  
Q75170 Serine/threonine-protein phosphatase 6 regulatory subunit 2 OS=Homo sapiens GN=PPP6R2 PE=1 SV=2 - [PP6R2\_HUMAN]  
Q8WYA6 Beta-catenin-like protein 1 OS=Homo sapiens GN=CTNBL1 PE=1 SV=1 - [CTBL1\_HUMAN]  
Q6ZMP0 Thrombospondin type-1 domain-containing protein 4 OS=Homo sapiens GN=THSD4 PE=2 SV=2 - [THSD4\_HUMAN]  
Q86VX9 Vacuolar fusion protein MON1 homolog A OS=Homo sapiens GN=MON1A PE=1 SV=2 - [MON1A\_HUMAN]  
Q9HTL9 Sin3 histone deacetylase corepressor complex component SDS3 OS=Homo sapiens GN=SDS3 PE=1 SV=2 - [SDS3\_HUMAN]  
Q9U114 Prenylated Rab acceptor protein 1 OS=Homo sapiens GN=RABAC1 PE=1 SV=1 - [PRAF1\_HUMAN]  
Q75529 TAF5-like RNA polymerase II p300/CBP-associated factor-associated factor 65 kDa subunit 5L OS=Homo sapiens GN=TAF5L PE=1 SV=1 - [TAF5L\_HUMAN]  
Q75326 Semaphorin-7A OS=Homo sapiens GN=SEMA7A PE=1 SV=1 - [SEMA7A\_HUMAN]  
Q5VZ65 N-alpha-acetyltransferase 35, NatC auxiliary subunit OS=Homo sapiens GN=NAA35 PE=1 SV=1 - [NAA35\_HUMAN]  
Q8NAV1 Pre-mRNA-splicing factor 38A OS=Homo sapiens GN=PRPF38A PE=1 SV=1 - [PR38A\_HUMAN]  
Q9BVL2 Nucleoporin p58/p45 OS=Homo sapiens GN=NUP1L1 PE=1 SV=1 - [NUP1L1\_HUMAN]  
Q9H089 Large subunit GTPase 1 homolog OS=Homo sapiens GN=LSG1 PE=1 SV=2 - [LSG1\_HUMAN]  
Q94864 STAG4 complex 65 subunit gamma OS=Homo sapiens GN=SUP17L PE=1 SV=1 - [ST65G\_HUMAN]  
P53794 Sodium/myo-inositol cotransporter OS=Homo sapiens GN=SLC5A3 PE=3 SV=2 - [SC5A3\_HUMAN]  
Q8WYA0 Intraflagellar transport protein 81 homolog OS=Homo sapiens GN=IFT81 PE=1 SV=1 - [IFT81\_HUMAN]  
Q5VZK9 Leucine-rich repeat-containing protein 16A OS=Homo sapiens GN=LRRRC16A PE=1 SV=1 - [LR16A\_HUMAN]  
P55011 Solute carrier family 12 member 2 OS=Homo sapiens GN=SLC12A2 PE=1 SV=1 - [S12A2\_HUMAN]  
Q9H9B4 Sideroflexin-1 OS=Homo sapiens GN=SFXX1 PE=1 SV=4 - [SFXX1\_HUMAN]  
Q00264 Membrane-associated progesterone receptor component 1 OS=Homo sapiens GN=PGRMC1 PE=1 SV=3 - [PGRC1\_HUMAN]  
Q96BH1 E3 ubiquitin-protein ligase RNF25 OS=Homo sapiens GN=RNF25 PE=1 SV=1 - [RNF25\_HUMAN]  
Q9NS98 Semaphorin-3G OS=Homo sapiens GN=SEMA3G PE=2 SV=1 - [SEM3G\_HUMAN]  
Q9H9Q2 COP9 signalosome complex subunit 7b OS=Homo sapiens GN=COP57B PE=1 SV=1 - [CSN7B\_HUMAN]  
Q9UJV9 Probable ATP-dependent RNA helicase DDX41 OS=Homo sapiens GN=DDX41 PE=1 SV=2 - [DDX41\_HUMAN]  
Q53759 HCLSI-binding protein 3 OS=Homo sapiens GN=HS1BP3 PE=1 SV=1 - [H1BP3\_HUMAN]  
Q6S8J3 POTE ankyrin domain family member E OS=Homo sapiens GN=POTEE PE=1 SV=3 - [POTEE\_HUMAN]  
Q14964 Hepatocyte growth factor-regulated tyrosine kinase substrate OS=Homo sapiens GN=HGS PE=1 SV=1 - [HGS\_HUMAN]  
Q96EN8 Molybdenum cofactor sulfurase OS=Homo sapiens GN=MOCOS PE=1 SV=2 - [MOCOS\_HUMAN]  
Q9NT26 RNA-binding protein 12 OS=Homo sapiens GN=RBM12 PE=1 SV=1 - [RBM12\_HUMAN]  
Q75822 Eukaryotic translation initiation factor 3 subunit J OS=Homo sapiens GN=EIF3J PE=1 SV=2 - [EIF3J\_HUMAN]  
P51970 NADH dehydrogenase [ubiquinone] 1 alpha subcomplex subunit 8 OS=Homo sapiens GN=NDUFAS8 PE=1 SV=3 - [NDUAF8\_HUMAN]  
Q13472 DNA topoisomerase 3-alpha OS=Homo sapiens GN=TOP3A PE=1 SV=1 - [TOP3A\_HUMAN]  
Q9Y6Q5 AP-1 complex subunit mu-2 OS=Homo sapiens GN=AP1M2 PE=1 SV=4 - [AP1M2\_HUMAN]  
Q9Y487 V-type proton ATPase 116 kDa subunit a isoform 2 OS=Homo sapiens GN=ATP6V0A2 PE=1 SV=2 - [VPPP2\_HUMAN]  
Q5TAQ9 DBP1 and CUL4-associated factor 8 OS=Homo sapiens GN=DCAF8 PE=1 SV=1 - [DCAF8\_HUMAN]  
Q3B7T1 Erythroid differentiation-related factor 1 OS=Homo sapiens GN=EDRF1 PE=1 SV=1 - [EDRF1\_HUMAN]  
Q75976 Carboxypeptidase D OS=Homo sapiens GN=CPD PE=1 SV=2 - [CPDP\_HUMAN]  
Q95297 Myelin protein zero-like protein 1 OS=Homo sapiens GN=MPZL1 PE=1 SV=1 - [MPZL1\_HUMAN]  
P06730 Eukaryotic translation initiation factor 4E OS=Homo sapiens GN=EIF4E PE=1 SV=2 - [IF4E\_HUMAN]  
P22059 Oxysterol-binding protein 1 OS=Homo sapiens GN=OSBP PE=1 SV=1 - [OSBP1\_HUMAN]  
P02458 Collagen alpha-1(II) chain OS=Homo sapiens GN=COL2A1 PE=1 SV=3 - [CO2A1\_HUMAN]  
Q14574 Desmocollin-3 OS=Homo sapiens GN=DSC3 PE=1 SV=3 - [DSC3\_HUMAN]  
Q7L7X3 Serine/threonine-protein kinase TAO1 OS=Homo sapiens GN=TAOK1 PE=1 SV=1 - [TAOK1\_HUMAN]  
Q969G3 SWI/SNF-related matrix-associated actin-dependent regulator of chromatin subfamily E member 1 OS=Homo sapiens GN=SMARCE1 PE=1 SV=2 - [SMCE1\_HUMAN]  
P31751 RAC-beta serine/threonine-protein kinase OS=Homo sapiens GN=AKT2 PE=1 SV=2 - [AKT2\_HUMAN]  
Q9Y2X7 ARF GTPase-activating protein G1T1 OS=Homo sapiens GN=G1T1 PE=1 SV=2 - [G1T1\_HUMAN]  
Q6A112 Ankyrin repeat domain-containing protein 40 OS=Homo sapiens GN=ANKRD40 PE=1 SV=2 - [ANR40\_HUMAN]  
Q8TCX1 Cytoplasmic dynein 2 light intermediate chain 1 OS=Homo sapiens GN=DYNC2L1 PE=1 SV=1 - [DC2L1\_HUMAN]  
Q8TCY9 Up-regulator of cell proliferation OS=Homo sapiens GN=URGCP PE=1 SV=2 - [URGCP\_HUMAN]  
Q9NVP2 Histone chaperone ASF1B OS=Homo sapiens GN=ASF1B PE=1 SV=1 - [ASF1B\_HUMAN]  
Q8NCE2 Myotubularin-related protein 14 OS=Homo sapiens GN=MTMR14 PE=1 SV=2 - [MTMRE\_HUMAN]  
Q9UBX5 Fibulin-5 OS=Homo sapiens GN=FBLN5 PE=1 SV=1 - [FBLN5\_HUMAN]  
Q75190 DnaJ homolog subfamily B member 6 OS=Homo sapiens GN=DNAJB6 PE=1 SV=2 - [DNJB6\_HUMAN]  
P01591 Immunoglobulin J chain OS=Homo sapiens GN=IGJ PE=1 SV=4 - [IGJ\_HUMAN]  
Q43156 TEL2-interacting protein 1 homolog OS=Homo sapiens GN=TTI1 PE=1 SV=3 - [TTI1\_HUMAN]  
Q75400 Pre-mRNA-processing factor 40 homolog A OS=Homo sapiens GN=PRPF40A PE=1 SV=2 - [PR40A\_HUMAN]  
Q00536 Cyclin-dependent kinase 16 OS=Homo sapiens GN=CDK16 PE=1 SV=1 - [CDK16\_HUMAN]  
Q9H4H8 Protein FAM83D OS=Homo sapiens GN=FAM83D PE=1 SV=3 - [FAM83D\_HUMAN]  
Q96DA2 Ras-related protein Rab-39B OS=Homo sapiens GN=RAB39B PE=1 SV=1 - [RB39B\_HUMAN]  
Q9H8M7 Protein FAM188A OS=Homo sapiens GN=FAM188A PE=1 SV=1 - [F188A\_HUMAN]  
Q9UQ88 Cyclin-dependent kinase 11A OS=Homo sapiens GN=CDK11A PE=1 SV=4 - [CD11A\_HUMAN]  
Q60333 Kinesin-like protein KIF1B OS=Homo sapiens GN=KIF1B PE=1 SV=5 - [KIF1B\_HUMAN]  
Q63HN8 E3 ubiquitin-protein ligase RNF213 OS=Homo sapiens GN=RNF213 PE=1 SV=3 - [RN213\_HUMAN]  
Q9ULR0 Pre-mRNA-splicing factor ISY1 homolog OS=Homo sapiens GN=ISY1 PE=1 SV=3 - [ISY1\_HUMAN]  
Q9V520 Protein PRR2C2 OS=Homo sapiens GN=PRR2C2 PE=1 SV=4 - [PRC2C\_HUMAN]  
Q9NQ50 39S ribosomal protein L40, mitochondrial OS=Homo sapiens GN=MRPL40 PE=1 SV=1 - [RM40\_HUMAN]  
P55327 Tumor protein D52 OS=Homo sapiens GN=TPD52 PE=1 SV=2 - [TPD52\_HUMAN]  
Q99666 Neuroblast differentiation-associated protein AHNK OS=Homo sapiens GN=AHNK PE=1 SV=2 - [AHNK\_HUMAN]  
P10253 Lysosomal alpha-glucosidase OS=Homo sapiens GN=GAA PE=1 SV=4 - [LYAG\_HUMAN]  
P20020 Plasma membrane calcium-transporting ATPase 1 OS=Homo sapiens GN=ATP2B1 PE=1 SV=3 - [AT2B1\_HUMAN]  
Q9N84 G-protein coupled receptor family C group 5 member C OS=Homo sapiens GN=GPRC5C PE=1 SV=2 - [GPC5C\_HUMAN]  
Q9H118 Activating signal cointegrator 1 complex subunit 2 OS=Homo sapiens GN=ASCC2 PE=1 SV=3 - [ASCC2\_HUMAN]  
Q00403 Transcription initiation factor IIB OS=Homo sapiens GN=GTF2B PE=1 SV=1 - [TF2B\_HUMAN]  
Q08379 Golgin subfamily A member 2 OS=Homo sapiens GN=GOLGA2 PE=1 SV=3 - [GOGA2\_HUMAN]  
P21127 Cyclin-dependent kinase 11B OS=Homo sapiens GN=CDK11B PE=1 SV=3 - [CD11B\_HUMAN]  
P21980 Protein-glutamine gamma-glutamyltransferase 2 OS=Homo sapiens GN=TM2 PE=1 SV=2 - [TM2\_HUMAN]  
Q9HDC9 Adipocyte plasma membrane-associated protein OS=Homo sapiens GN=APMAP PE=1 SV=2 - [APMAP\_HUMAN]  
P23634 Plasma membrane calcium-transporting ATPase 4 OS=Homo sapiens GN=ATP2B4 PE=1 SV=2 - [AT2B4\_HUMAN]  
Q8N3Y1 F-box/WD repeat-containing protein 8 OS=Homo sapiens GN=FBXW8 PE=1 SV=2 - [FBXW8\_HUMAN]  
P36871 Phosphoglucomutase 1 OS=Homo sapiens GN=PGM1 PE=1 SV=3 - [PGM1\_HUMAN]  
Q15375 Ephrin type-A receptor 7 OS=Homo sapiens GN=EPHA7 PE=1 SV=3 - [EPHA7\_HUMAN]  
Q81WF6 Protein DENND6A OS=Homo sapiens GN=DENND6A PE=1 SV=1 - [DEN6A\_HUMAN]  
Q96BY7 Autophagy-related protein 2 homolog B OS=Homo sapiens GN=ATG2B PE=1 SV=5 - [ATG2B\_HUMAN]  
Q96EK9 Protein KTI12 homolog OS=Homo sapiens GN=KTI12 PE=1 SV=1 - [KTI12\_HUMAN]  
P31323 cAMP-dependent protein kinase type II-beta regulatory subunit OS=Homo sapiens GN=PRKAR2B PE=1 SV=3 - [KAP3\_HUMAN]  
Q14527 Helicase-like transcription factor OS=Homo sapiens GN=HLTF PE=1 SV=2 - [HLTF\_HUMAN]  
P42356 Phosphatidylinositol 4-kinase alpha OS=Homo sapiens GN=PI4KA PE=1 SV=3 - [PI4KA\_HUMAN]

Q9UIK5 TRAF2 and NCK-interacting protein kinase OS=Homo sapiens GN=TNIK PE=1 SV=1 - [TNIK\_HUMAN]  
 Q71H61 Immunoglobulin-like domain-containing receptor 2 OS=Homo sapiens GN=ILDR2 PE=2 SV=1 - [ILDR2\_HUMAN]  
 Q9UHW5 GPN-loop GTPase 3 OS=Homo sapiens GN=GNP3 PE=1 SV=2 - [GNP3\_HUMAN]  
 Q9P2K3 REST corepressor 3 OS=Homo sapiens GN=RCOR3 PE=1 SV=2 - [RCOR3\_HUMAN]  
 Q53HC5 Kelch-like protein 26 OS=Homo sapiens GN=KLHL26 PE=1 SV=2 - [KLHL26\_HUMAN]  
 P61601 Neurocalcin-delta OS=Homo sapiens GN=NCALD PE=1 SV=2 - [NCALD\_HUMAN]  
 Q5VIR6 Vacuolar protein sorting-associated protein 53 homolog OS=Homo sapiens GN=VPS53 PE=1 SV=1 - [VPS53\_HUMAN]  
 P25440 Bromodomain-containing protein 2 OS=Homo sapiens GN=BRD2 PE=1 SV=2 - [BRD2\_HUMAN]  
 P49815 Tuberin OS=Homo sapiens GN=TSC2 PE=1 SV=2 - [TSC2\_HUMAN]  
 Q81XH7 Negative elongation factor C/D OS=Homo sapiens GN=NELFCD PE=1 SV=2 - [NELFD\_HUMAN]  
 Q9BZE9 Tether containing UBA domain for GLUT4 OS=Homo sapiens GN=ASPC1 PE=1 SV=1 - [ASPC1\_HUMAN]  
 Q12965 Unconventional myosin-1e OS=Homo sapiens GN=MYO1E PE=1 SV=2 - [MYO1E\_HUMAN]  
 Q9Y3C0 WASH complex subunit CCDC53 OS=Homo sapiens GN=CCDC53 PE=1 SV=1 - [CCDC53\_HUMAN]  
 P07711 Cathepsin L1 OS=Homo sapiens GN=CTSL PE=1 SV=2 - [CATL1\_HUMAN]  
 Q86WJ1 Chromodomain-helicase-DNA-binding protein 1-like OS=Homo sapiens GN=CHD1L PE=1 SV=2 - [CHD1L\_HUMAN]  
 Q9H5Z1 Probable ATP-dependent RNA helicase DHX35 OS=Homo sapiens GN=DHX35 PE=1 SV=2 - [DHX35\_HUMAN]  
 P54803 Galactocerebrosidase OS=Homo sapiens GN=GALC PE=1 SV=2 - [GALC\_HUMAN]  
 Q15057 Arf-GAP with coiled-coil, ANK repeat and PH domain-containing protein 2 OS=Homo sapiens GN=ACAP2 PE=1 SV=3 - [ACAP2\_HUMAN]  
 Q3ZM24 Leucine-rich repeat Flightless-interacting protein 1 OS=Homo sapiens GN=LRRF1P1 PE=1 SV=2 - [LRRF1\_HUMAN]  
 Q96DE0 U8 snoRNA-decapping enzyme OS=Homo sapiens GN=NUD16 PE=1 SV=2 - [NUD16\_HUMAN]  
 Q86UE8 Serine/threonine-protein kinase tousled-like 2 OS=Homo sapiens GN=TLK2 PE=1 SV=2 - [TLK2\_HUMAN]  
 Q9BWT6 Meiotic nuclear division protein 1 homolog OS=Homo sapiens GN=MND1 PE=1 SV=1 - [MND1\_HUMAN]  
 Q9UHI7 DNA dC>du-editing enzyme APOBEC-3B OS=Homo sapiens GN=APOBEC3B PE=1 SV=1 - [APOBEC3B\_HUMAN]  
 Q16512 Serine/threonine-protein kinase N1 OS=Homo sapiens GN=PKN1 PE=1 SV=2 - [PKN1\_HUMAN]  
 P30622 CAP-Gly domain-containing linker protein 1 OS=Homo sapiens GN=CLIP1 PE=1 SV=2 - [CLIP1\_HUMAN]  
 Q12841 Follistatin-related protein 1 OS=Homo sapiens GN=FSTL1 PE=1 SV=1 - [FSTL1\_HUMAN]  
 Q14689 Disco-interacting protein 2 homolog A OS=Homo sapiens GN=DIP2A PE=1 SV=2 - [DIP2A\_HUMAN]  
 P29320 Ephrin type-A receptor 3 OS=Homo sapiens GN=EPHA3 PE=1 SV=2 - [EPHA3\_HUMAN]  
 P62068 Ubiquitin carboxyl-terminal hydrolase 46 OS=Homo sapiens GN=USP46 PE=1 SV=1 - [USP46\_HUMAN]  
 Q6N069 N-alpha-acetyltransferase 16, NatA auxiliary subunit OS=Homo sapiens GN=NAA16 PE=1 SV=2 - [NAA16\_HUMAN]  
 Q9BX40 Protein LSM14 homolog B OS=Homo sapiens GN=LSM14B PE=1 SV=1 - [LSM14B\_HUMAN]  
 Q95445 Apolipoprotein M OS=Homo sapiens GN=APOM PE=1 SV=2 - [APOM\_HUMAN]  
 Q7KYR7 Butyrophilin subfamily 2 member A1 OS=Homo sapiens GN=BT2A1 PE=1 SV=3 - [BT2A1\_HUMAN]  
 Q6UN15 Pre-mRNA 3'-end-processing factor FIP1 OS=Homo sapiens GN=FIP1L1 PE=1 SV=1 - [FIP1\_HUMAN]  
 Q7Z3C6 Autophagy-related protein 9A OS=Homo sapiens GN=ATG9A PE=1 SV=3 - [ATG9A\_HUMAN]  
 Q96L77 Protein C9orf72 OS=Homo sapiens GN=C9orf72 PE=1 SV=2 - [C9orf72\_HUMAN]  
 Q07889 Son of sevenless homolog 1 OS=Homo sapiens GN=SOS1 PE=1 SV=1 - [SOS1\_HUMAN]  
 Q16875 6-phosphofructo-2-kinase/fructose-2,6-bisphosphatase 3 OS=Homo sapiens GN=PFKFB3 PE=1 SV=1 - [PFKFB3\_HUMAN]  
 Q8UHU2 Transforming growth factor-beta receptor-associated protein 1 OS=Homo sapiens GN=TGFBRAP1 PE=1 SV=1 - [TGFBAP1\_HUMAN]  
 P08603 Complement factor H OS=Homo sapiens GN=CFH PE=1 SV=4 - [CFAH\_HUMAN]  
 Q13428 Treacle protein OS=Homo sapiens GN=TCOF1 PE=1 SV=3 - [TCOF\_HUMAN]  
 Q99717 Mothers against decapentaplegic homolog 5 OS=Homo sapiens GN=SMAD5 PE=1 SV=1 - [SMAD5\_HUMAN]  
 P49321 Nuclear autoantigenic sperm protein OS=Homo sapiens GN=NASP PE=1 SV=2 - [NASP\_HUMAN]  
 Q86X49 HEAT repeat-containing protein 5A OS=Homo sapiens GN=HEATR5A PE=1 SV=2 - [HEATR5A\_HUMAN]  
 Q14671 Pumilio homolog 1 OS=Homo sapiens GN=PUM1 PE=1 SV=3 - [PUM1\_HUMAN]  
 Q9UG01 Intraflagellar transport protein 172 homolog OS=Homo sapiens GN=IFT172 PE=1 SV=2 - [IFT172\_HUMAN]  
 P02461 Collagen alpha-1(III) chain OS=Homo sapiens GN=COL3A1 PE=1 SV=4 - [COL3A1\_HUMAN]  
 Q9UK39 Nocturnin OS=Homo sapiens GN=CCRN4L PE=2 SV=2 - [NOCT\_HUMAN]  
 Q69YN4 Protein virilizer homolog OS=Homo sapiens GN=KIAA1429 PE=1 SV=2 - [VIR\_HUMAN]  
 Q96DX4 RING finger and SPRY domain-containing protein 1 OS=Homo sapiens GN=RSRY1 PE=1 SV=1 - [RSRY1\_HUMAN]  
 Q9P2D0 Inhibitor of Bruton tyrosine kinase OS=Homo sapiens GN=IBTK PE=1 SV=3 - [IBTK\_HUMAN]  
 Q01130 Serine/arginine-rich splicing factor 2 OS=Homo sapiens GN=SRSP2 PE=1 SV=4 - [SRSP2\_HUMAN]  
 Q92696 Geranylgeranyl transferase type-2 subunit alpha OS=Homo sapiens GN=RABGGTA PE=1 SV=2 - [PGTA\_HUMAN]  
 P13611 Versican core protein OS=Homo sapiens GN=VCAN PE=1 SV=3 - [CSPG2\_HUMAN]  
 P00352 Retinal dehydrogenase 1 OS=Homo sapiens GN=ALDH1A1 PE=1 SV=2 - [ALDH1A1\_HUMAN]  
 Q69Y00 Cytosolin A OS=Homo sapiens GN=SPECC1L PE=1 SV=2 - [CYTSA\_HUMAN]  
 Q9BZ68 Dipthamide biosynthesis protein 1 OS=Homo sapiens GN=DPH1 PE=1 SV=2 - [DPH1\_HUMAN]  
 Q9UHG2 PROASAs OS=Homo sapiens GN=PSCSKIN PE=1 SV=1 - [PSCSK1\_HUMAN]  
 Q8TBZ3 WD repeat-containing protein 20 OS=Homo sapiens GN=WDR20 PE=1 SV=2 - [WDR20\_HUMAN]  
 Q9H4L5 Oxyester-binding protein-related protein 3 OS=Homo sapiens GN=OSBPL3 PE=1 SV=1 - [OSBPL3\_HUMAN]  
 P11498 Pyruvate carboxylase, mitochondrial OS=Homo sapiens GN=PC PE=1 SV=2 - [PYC\_HUMAN]  
 Q14966 Ras-related protein Rab-7L1 OS=Homo sapiens GN=RAB29 PE=1 SV=1 - [RAB7L\_HUMAN]  
 P19525 Interferon-induced, double-stranded RNA-activated protein kinase OS=Homo sapiens GN=EIF2AK2 PE=1 SV=2 - [EIF2AK2\_HUMAN]  
 P11217 Glycogen phosphorylase, muscle form OS=Homo sapiens GN=PYGM PE=1 SV=6 - [PYGM\_HUMAN]  
 Q9H1K0 Rabenosyn-5 OS=Homo sapiens GN=RBSN PE=1 SV=2 - [RBSN5\_HUMAN]  
 A6NHL2 Tubulin alpha chain-like 3 OS=Homo sapiens GN=TUBAL3 PE=1 SV=2 - [TUBAL3\_HUMAN]  
 Q14653 Interferon regulatory factor 3 OS=Homo sapiens GN=IRF3 PE=1 SV=1 - [IRF3\_HUMAN]  
 Q92804 TATA-binding protein-associated factor 2N OS=Homo sapiens GN=TAF15 PE=1 SV=1 - [RBP56\_HUMAN]  
 P23443 Ribosomal protein S6 kinase beta-1 OS=Homo sapiens GN=RPS6KB1 PE=1 SV=2 - [KS6B1\_HUMAN]  
 P61764 Syntaxin-binding protein 1 OS=Homo sapiens GN=STXB1 PE=1 SV=1 - [STXB1\_HUMAN]  
 Q9Y466 Talin-2 OS=Homo sapiens GN=TLN2 PE=1 SV=4 - [TLN2\_HUMAN]  
 Q9Y6M5 Zinc transporter 1 OS=Homo sapiens GN=SLC30A1 PE=1 SV=3 - [ZNT1\_HUMAN]  
 Q96008 Mitochondrial import receptor subunit TOM40 homolog OS=Homo sapiens GN=TOMM40 PE=1 SV=1 - [TOM40\_HUMAN]  
 Q15542 Transcription initiation factor TFIID subunit 5 OS=Homo sapiens GN=TAF5 PE=1 SV=3 - [TAF5\_HUMAN]  
 Q61Q22 Ras-related protein Rab-12 OS=Homo sapiens GN=RAB12 PE=1 SV=3 - [RAB12\_HUMAN]  
 Q92979 Ribosomal RNA small subunit methyltransferase NEP1 OS=Homo sapiens GN=EMG1 PE=1 SV=4 - [NEP1\_HUMAN]  
 P36776 Lon protease homolog, mitochondrial OS=Homo sapiens GN=LONP1 PE=1 SV=2 - [LONM\_HUMAN]  
 Q15031 Plexin-B2 OS=Homo sapiens GN=PLXNB2 PE=1 SV=3 - [PLXNB2\_HUMAN]  
 P14384 Carboxypeptidase M OS=Homo sapiens GN=CPM PE=1 SV=2 - [CPM\_HUMAN]  
 Q6DK11 60S ribosomal protein L7-like 1 OS=Homo sapiens GN=RPL7L1 PE=1 SV=1 - [RL7L\_HUMAN]  
 Q95251 Histone acetyltransferase KAT7 OS=Homo sapiens GN=KAT7 PE=1 SV=1 - [KAT7\_HUMAN]  
 Q9Y311 F-box only protein 7 OS=Homo sapiens GN=FBXO7 PE=1 SV=1 - [FBX7\_HUMAN]  
 Q14674 Separin OS=Homo sapiens GN=ESPL1 PE=1 SV=3 - [ESPL1\_HUMAN]  
 P18887 DNA repair protein XRCC1 OS=Homo sapiens GN=XRCC1 PE=1 SV=2 - [XRCC1\_HUMAN]  
 Q5J7H9 RRP12-like protein OS=Homo sapiens GN=RRP12 PE=1 SV=2 - [RRP12\_HUMAN]  
 P78362 SRSF protein kinase 2 OS=Homo sapiens GN=SRPK2 PE=1 SV=3 - [SRPK2\_HUMAN]  
 Q5UIP0 Telomere-associated protein RIF1 OS=Homo sapiens GN=RIF1 PE=1 SV=2 - [RIF1\_HUMAN]  
 Q81YD1 Eukaryotic peptide chain release factor GTP-binding subunit ERF3B OS=Homo sapiens GN=GSPT2 PE=1 SV=2 - [ERF3B\_HUMAN]  
 Q7LGC8 Carbohydrate sulfotransferase 3 OS=Homo sapiens GN=CHST3 PE=1 SV=3 - [CHST3\_HUMAN]  
 Q60245 Protocadherin-7 OS=Homo sapiens GN=PCDH7 PE=1 SV=2 - [PCDH7\_HUMAN]  
 P53801 Pituitary tumor-transforming gene 1 protein-interacting protein OS=Homo sapiens GN=PTTG1IP PE=1 SV=1 - [PTTG\_HUMAN]  
 Q13432 Protein unc-119 homolog A OS=Homo sapiens GN=UNC119 PE=1 SV=1 - [U119A\_HUMAN]  
 Q94830 Phospholipase DDHD2 OS=Homo sapiens GN=DDHD2 PE=1 SV=2 - [DDHD2\_HUMAN]  
 Q13601 KRR1 small subunit processome component homolog OS=Homo sapiens GN=KRR1 PE=1 SV=4 - [KRR1\_HUMAN]  
 Q75330 Hyaluronan mediated motility receptor OS=Homo sapiens GN=HMMR PE=1 SV=2 - [HMMR\_HUMAN]  
 Q9H981 Actin-related protein 8 OS=Homo sapiens GN=ACTR8 PE=1 SV=2 - [ARP8\_HUMAN]  
 P08581 Hepatocyte growth factor receptor OS=Homo sapiens GN=MET PE=1 SV=4 - [MET\_HUMAN]  
 Q14165 Mалеctin OS=Homo sapiens GN=MLEC PE=1 SV=1 - [MLEC\_HUMAN]  
 P48029 Sodium- and chloride-dependent creatine transporter 1 OS=Homo sapiens GN=SLC6A8 PE=1 SV=1 - [SC6A8\_HUMAN]  
 Q92859 Neogenin OS=Homo sapiens GN=NEO1 PE=1 SV=2 - [NEO1\_HUMAN]  
 P46020 Phosphorylase b kinase regulatory subunit alpha, skeletal muscle isoform OS=Homo sapiens GN=PKP1 PE=1 SV=2 - [PKP1\_HUMAN]  
 Q99519 Sialidase-1 OS=Homo sapiens GN=NEU1 PE=1 SV=1 - [NEU1\_HUMAN]  
 Q6ZM10 Protein phosphatase 1 regulatory subunit 21 OS=Homo sapiens GN=PPP1R21 PE=1 SV=1 - [PPR21\_HUMAN]  
 Q9H0M0 NEDD4-like E3 ubiquitin-protein ligase WWP1 OS=Homo sapiens GN=WWP1 PE=1 SV=1 - [WWP1\_HUMAN]  
 Q15637 Splicing factor 1 OS=Homo sapiens GN=SF1 PE=1 SV=4 - [SFO1\_HUMAN]  
 Q9U114 E3 ISG15-protein ligase HERC5 OS=Homo sapiens GN=HERC5 PE=1 SV=2 - [HERC5\_HUMAN]  
 Q9N2Q3 NCK-interacting protein with SH3 domain OS=Homo sapiens GN=NCKIPSD PE=1 SV=1 - [SPN90\_HUMAN]  
 Q5PRF9 Protein Smaug homolog 2 OS=Homo sapiens GN=SAMD4B PE=1 SV=1 - [SMAG2\_HUMAN]  
 Q96BD8 Spindle and kinetochore-associated protein 1 OS=Homo sapiens GN=SKA1 PE=1 SV=1 - [SKA1\_HUMAN]  
 Q9COB5 Palmitoyltransferase ZDHHC5 OS=Homo sapiens GN=ZDHHC5 PE=1 SV=2 - [ZDHHC5\_HUMAN]  
 Q86YR5 G-protein-coupled modulator 1 OS=Homo sapiens GN=GPSM1 PE=1 SV=2 - [GPSM1\_HUMAN]  
 Q81WR0 Zinc finger CCH domain-containing protein 7A OS=Homo sapiens GN=ZCFH7A PE=1 SV=1 - [ZCFH7A\_HUMAN]  
 Q9P016 Thymocyte nuclear protein 1 OS=Homo sapiens GN=THYN1 PE=1 SV=1 - [THYN1\_HUMAN]  
 Q94889 Kelch-like protein 18 OS=Homo sapiens GN=KLHL18 PE=1 SV=3 - [KLHL18\_HUMAN]  
 Q9ULF5 Zinc transporter ZIP10 OS=Homo sapiens GN=SLC39A10 PE=1 SV=2 - [S39AA\_HUMAN]



P11310 Medium-chain specific acyl-CoA dehydrogenase, mitochondrial OS=Homo sapiens GN=ACADM PE=1 SV=1 - [ACADM\_HUMAN]  
075582 Ribosomal protein S6 kinase alpha-5 OS=Homo sapiens GN=RPS6KA5 PE=1 SV=1 - [RPS6KA5\_HUMAN]  
095793 Double-stranded RNA-binding protein Staufen homolog 1 OS=Homo sapiens GN=STAU1 PE=1 SV=2 - [STAU1\_HUMAN]  
092620 Pre-mRNA-splicing factor ATP-dependent RNA helicase PRP16 OS=Homo sapiens GN=DHX38 PE=1 SV=2 - [PRP16\_HUMAN]  
068085 Natural cytotoxicity triggering receptor 3 ligand 1 OS=Homo sapiens GN=NCR3LG1 PE=1 SV=1 - [NCR3LG1\_HUMAN]  
P06241 Tyrosine-protein kinase Fyn OS=Homo sapiens GN=FYN PE=1 SV=3 - [FYN\_HUMAN]  
043347 RNA-binding protein Musashi homolog 1 OS=Homo sapiens GN=MSI1 PE=1 SV=1 - [MSI1\_HUMAN]  
081174 Katanin p60 ATPase-containing subunit A-like 2 OS=Homo sapiens GN=KATNAL2 PE=2 SV=3 - [KATNAL2\_HUMAN]  
P54762 Ephrin type-B receptor 1 OS=Homo sapiens GN=EPHB1 PE=1 SV=1 - [EPHB1\_HUMAN]  
081ZA0 Dylexia-associated protein KIAA0319-like protein OS=Homo sapiens GN=KIAA0319L PE=1 SV=2 - [K319L\_HUMAN]  
0519L3 Protein wntless homolog OS=Homo sapiens GN=WLS PE=1 SV=2 - [WLS\_HUMAN]  
000628 Peroxisomal targeting signal 2 receptor OS=Homo sapiens GN=PEX7 PE=1 SV=1 - [PEX7\_HUMAN]  
Q460M1 Erythroferrone OS=Homo sapiens GN=FAM132B PE=2 SV=2 - [ERFE\_HUMAN]  
Q8TBF2 Prostaglandin synthase OS=Homo sapiens GN=FAM213B PE=2 SV=1 - [PGFS\_HUMAN]  
Q9NPQ8 Synembryn-A OS=Homo sapiens GN=RIC8A PE=1 SV=3 - [RIC8A\_HUMAN]  
P28370 Probable global transcription activator SNF2L1 OS=Homo sapiens GN=SMARCA1 PE=1 SV=2 - [SMCA1\_HUMAN]  
P58004 Sestrin-2 OS=Homo sapiens GN=SESN2 PE=1 SV=1 - [SESN2\_HUMAN]  
Q8M4N3 Kelch-like protein 36 OS=Homo sapiens GN=KLHL36 PE=1 SV=1 - [KLHL36\_HUMAN]  
075915 PRA1 family protein 3 OS=Homo sapiens GN=ARL6IP5 PE=1 SV=1 - [PRAF3\_HUMAN]  
Q9NRA1 Platelet-derived growth factor C OS=Homo sapiens GN=PDGFC PE=1 SV=2 - [PDGFC\_HUMAN]  
Q9P2E9 Ribosome-binding protein 1 OS=Homo sapiens GN=RRBP1 PE=1 SV=4 - [RRBP1\_HUMAN]  
P55212 Caspase-6 OS=Homo sapiens GN=CASP6 PE=1 SV=2 - [CASP6\_HUMAN]  
Q00537 Cyclin-dependent kinase 17 OS=Homo sapiens GN=CDK17 PE=1 SV=2 - [CDK17\_HUMAN]  
Q93050 V-type proton ATPase 116 kDa subunit A isoform 1 OS=Homo sapiens GN=ATP6VOA1 PE=1 SV=3 - [VPP1\_HUMAN]  
Q05519 Serine/arginine-rich splicing factor 11 OS=Homo sapiens GN=SRSF11 PE=1 SV=1 - [SRSF11\_HUMAN]  
000443 Phosphatidylinositol 4-phosphate 3-kinase C2 domain-containing subunit alpha OS=Homo sapiens GN=PIK3C2A PE=1 SV=2 - [P3C2A\_HUMAN]  
Q15334 Lethal (2) giant larvae protein homolog 1 OS=Homo sapiens GN=LLGL1 PE=1 SV=3 - [L2GL1\_HUMAN]  
Q9Y3T9 Nucleolar complex protein 2 homolog OS=Homo sapiens GN=NOC2L PE=1 SV=4 - [NOC2L\_HUMAN]  
P50552 Vasodilator-stimulated phosphoprotein OS=Homo sapiens GN=VASP PE=1 SV=3 - [VASP\_HUMAN]  
Q6N0Q1 RAD50-interacting protein 1 OS=Homo sapiens GN=RINT1 PE=1 SV=1 - [RINT1\_HUMAN]  
Q08752 Peptidyl-prolyl cis-trans isomerase D OS=Homo sapiens GN=PPID PE=1 SV=3 - [PPID\_HUMAN]  
Q96HW7 Integrator complex subunit 4 OS=Homo sapiens GN=INTS4 PE=1 SV=2 - [INT4\_HUMAN]  
Q99985 Semaphorin-3C OS=Homo sapiens GN=SEMA3C PE=2 SV=2 - [SEM3C\_HUMAN]  
Q9NRB3 Carbohydrate sulfotransferase 12 OS=Homo sapiens GN=CHST12 PE=1 SV=2 - [CHSTC\_HUMAN]  
Q9NZU0 Leucine-rich repeat transmembrane protein FLRT3 OS=Homo sapiens GN=FLRT3 PE=1 SV=1 - [FLRT3\_HUMAN]  
P30825 High affinity cationic amino acid transporter 1 OS=Homo sapiens GN=SLC7A1 PE=1 SV=1 - [CTR1\_HUMAN]  
Q96L15 CCR4-NOT transcription complex subunit 6-like OS=Homo sapiens GN=CNOT6L PE=1 SV=2 - [CNO6L\_HUMAN]  
Q99700 Ataxin-2 OS=Homo sapiens GN=ATXN2 PE=1 SV=2 - [ATX2\_HUMAN]  
P46821 Microtubule-associated protein 1B OS=Homo sapiens GN=MAP1B PE=1 SV=2 - [MAP1B\_HUMAN]  
P52948 Nuclear pore complex protein Nup98-Nup96 OS=Homo sapiens GN=NUP98 PE=1 SV=4 - [NUP98\_HUMAN]  
Q9NYF8 Bcl-2-associated transcription factor 1 OS=Homo sapiens GN=BCLAF1 PE=1 SV=2 - [BCLF1\_HUMAN]  
Q92729 Receptor-type tyrosine-protein phosphatase U OS=Homo sapiens GN=PTPRU PE=1 SV=2 - [PTPRU\_HUMAN]  
P46934 E3 ubiquitin-protein ligase NEDD4 OS=Homo sapiens GN=NEDD4 PE=1 SV=4 - [NEDD4\_HUMAN]  
Q725K2 Wings apart-like protein homolog OS=Homo sapiens GN=WAPAL PE=1 SV=1 - [WAPL\_HUMAN]  
Q96JH7 Deubiquitinating protein VCP135 OS=Homo sapiens GN=VCP1P1 PE=1 SV=2 - [VCP1P1\_HUMAN]  
Q9U126 Importin-11 OS=Homo sapiens GN=IPO11 PE=1 SV=1 - [IPO11\_HUMAN]  
Q9Y3A3 MOB-like protein phocin OS=Homo sapiens GN=MOB4 PE=1 SV=1 - [PHOCN\_HUMAN]  
Q13228 Selenium-binding protein 1 OS=Homo sapiens GN=SELENBP1 PE=1 SV=2 - [SBP1\_HUMAN]  
P06400 Retinoblastoma-associated protein OS=Homo sapiens GN=RB1 PE=1 SV=2 - [RB\_HUMAN]  
P22681 E3 ubiquitin-protein ligase CBL OS=Homo sapiens GN=CBL PE=1 SV=2 - [CBL\_HUMAN]  
Q576F0 DDB1- and CUL4-associated factor 12 OS=Homo sapiens GN=DCAF12 PE=1 SV=1 - [DCAF12\_HUMAN]  
Q75179 Ankyrin repeat domain-containing protein 17 OS=Homo sapiens GN=ANKRD17 PE=1 SV=3 - [ANR17\_HUMAN]  
Q8TDY2 RB1-inducible coiled-coil protein 1 OS=Homo sapiens GN=RB1CC1 PE=1 SV=3 - [RBCC1\_HUMAN]  
Q6P2H3 Centrosomal protein of 85 kDa OS=Homo sapiens GN=CEP85 PE=1 SV=1 - [CEP85\_HUMAN]  
Q9BTU6 Phosphatidylinositol 4-kinase type 2-alpha OS=Homo sapiens GN=PI4K2A PE=1 SV=1 - [P4K2A\_HUMAN]  
Q9HT73 Protein NRDE2 homolog OS=Homo sapiens GN=NRDE2 PE=1 SV=3 - [NRDE2\_HUMAN]  
Q8TE02 Elongator complex protein 5 OS=Homo sapiens GN=ELP5 PE=1 SV=2 - [ELP5\_HUMAN]  
P07225 Vitamin K-dependent protein S OS=Homo sapiens GN=PROS1 PE=1 SV=1 - [PROS\_HUMAN]  
Q6P1X5 Transcription initiation factor TFIID subunit 2 OS=Homo sapiens GN=TAF2 PE=1 SV=3 - [TAF2\_HUMAN]  
Q92995 Ubiquitin carboxyl-terminal hydrolase 13 OS=Homo sapiens GN=USP13 PE=1 SV=2 - [UBP13\_HUMAN]  
Q9Y2E4 Disco-interacting protein 2 homolog C OS=Homo sapiens GN=DIP2C PE=1 SV=2 - [DIP2C\_HUMAN]  
Q86W56 Poly(ADP-ribose) glycohydrolase OS=Homo sapiens GN=PARG PE=1 SV=1 - [PARG\_HUMAN]  
P36896 Activin receptor type-1B OS=Homo sapiens GN=ACVR1B PE=1 SV=1 - [ACV1B\_HUMAN]  
Q06037 Tetraspanin-3 OS=Homo sapiens GN=TSPAN3 PE=2 SV=1 - [TSN3\_HUMAN]  
Q8WU79 Stromal membrane-associated protein 2 OS=Homo sapiens GN=SMAP2 PE=1 SV=1 - [SMAP2\_HUMAN]  
000423 Echinoderm microtubule-associated protein-like 1 OS=Homo sapiens GN=EML1 PE=1 SV=3 - [EMAL1\_HUMAN]  
Q9UPR3 Protein SMG5 OS=Homo sapiens GN=SMG5 PE=1 SV=3 - [SMG5\_HUMAN]  
P51784 Ubiquitin carboxyl-terminal hydrolase 11 OS=Homo sapiens GN=USP11 PE=1 SV=3 - [UBP11\_HUMAN]  
Q9UNW1 Multiple inositol polyphosphate phosphatase 1 OS=Homo sapiens GN=MINPP1 PE=1 SV=1 - [MINP1\_HUMAN]  
Q96JK2 DDB1- and CUL4-associated factor 5 OS=Homo sapiens GN=DCAF5 PE=1 SV=2 - [DCAF5\_HUMAN]  
Q9Y6N7 Roundabout homolog 1 OS=Homo sapiens GN=ROBO1 PE=1 SV=1 - [ROBO1\_HUMAN]  
P18031 Tyrosine-protein phosphatase non-receptor type 1 OS=Homo sapiens GN=PTPN1 PE=1 SV=1 - [PTN1\_HUMAN]  
Q9UHY1 Nuclear receptor-binding protein OS=Homo sapiens GN=NRBP1 PE=1 SV=1 - [NRBP\_HUMAN]  
Q15234 Protein CASC3 OS=Homo sapiens GN=CASC3 PE=1 SV=2 - [CASC3\_HUMAN]  
Q7L523 Ras-related GTP-binding protein A OS=Homo sapiens GN=RRAGA PE=1 SV=1 - [RRAGA\_HUMAN]  
Q96K76 Ubiquitin carboxyl-terminal hydrolase 47 OS=Homo sapiens GN=USP47 PE=1 SV=3 - [UBP47\_HUMAN]  
P46977 Dolichyl-diphosphooligosaccharide--protein glycosyltransferase subunit STT3A OS=Homo sapiens GN=STT3A PE=1 SV=2 - [STT3A\_HUMAN]  
060941 Dystrobrevin beta OS=Homo sapiens GN=DTNB PE=1 SV=1 - [DTNB\_HUMAN]  
Q7LBC6 Lysine-specific demethylase 3B OS=Homo sapiens GN=KDM3B PE=1 SV=2 - [KDM3B\_HUMAN]  
Q81WV7 E3 ubiquitin-protein ligase UBR1 OS=Homo sapiens GN=UBR1 PE=1 SV=1 - [UBR1\_HUMAN]  
043301 Heat shock 70 kDa protein 12A OS=Homo sapiens GN=HSPA12A PE=1 SV=2 - [HS12A\_HUMAN]  
015360 Fanconi anemia group A protein OS=Homo sapiens GN=FANCA PE=1 SV=2 - [FANCA\_HUMAN]  
Q8WXE1 ATR-interacting protein OS=Homo sapiens GN=ATRIP PE=1 SV=1 - [ATRIP\_HUMAN]  
Q9UKA9 Polypyrimidine tract-binding protein 2 OS=Homo sapiens GN=PTBP2 PE=1 SV=1 - [PTBP2\_HUMAN]  
Q05397 Focal adhesion kinase 1 OS=Homo sapiens GN=PTK2 PE=1 SV=2 - [FAK1\_HUMAN]  
Q08209 Serine/threonine-protein phosphatase 2B catalytic subunit alpha isoform OS=Homo sapiens GN=PPP3CA PE=1 SV=1 - [PP2BA\_HUMAN]  
Q8N3P4 Vacuolar protein sorting-associated protein 8 homolog OS=Homo sapiens GN=VPS8 PE=1 SV=3 - [VPS8\_HUMAN]  
000750 Phosphatidylinositol 4-phosphate 3-kinase C2 domain-containing subunit beta OS=Homo sapiens GN=PIK3C2B PE=1 SV=2 - [P3C2B\_HUMAN]  
000499 Myc box-dependent-interacting protein 1 OS=Homo sapiens GN=BIN1 PE=1 SV=1 - [BIN1\_HUMAN]  
P46531 Neurogenic locus notch homolog protein 1 OS=Homo sapiens GN=NOTCH1 PE=1 SV=4 - [NOTC1\_HUMAN]  
Q12800 Alpha-globin transcription factor CP2 OS=Homo sapiens GN=TFCP2 PE=1 SV=2 - [TFCP2\_HUMAN]  
Q9H832 Ubiquitin-conjugating enzyme E2 Z OS=Homo sapiens GN=UBE2Z PE=1 SV=2 - [UBE2Z\_HUMAN]  
P11166 Solute carrier family 2, facilitated glucose transporter member 1 OS=Homo sapiens GN=SLC2A1 PE=1 SV=2 - [GTR1\_HUMAN]  
Q7L099 Protein RUFY3 OS=Homo sapiens GN=RUFY3 PE=1 SV=1 - [RUFY3\_HUMAN]  
A5D8V6 Vacuolar protein sorting-associated protein 37C OS=Homo sapiens GN=VPS37C PE=1 SV=2 - [VP37C\_HUMAN]  
Q66K14 TBC1 domain family member 9B OS=Homo sapiens GN=TBC1D9B PE=1 SV=3 - [TBC9B\_HUMAN]  
P78509 Reelin OS=Homo sapiens GN=RELN PE=1 SV=3 - [RELN\_HUMAN]  
Q05682 Caldesmon OS=Homo sapiens GN=CALD1 PE=1 SV=3 - [CALD1\_HUMAN]  
Q9BZ17 Regulator of nonsense transcripts 3B OS=Homo sapiens GN=UPP3B PE=1 SV=1 - [REN3B\_HUMAN]  
Q8NEZ5 F-box only protein 22 OS=Homo sapiens GN=FBXO22 PE=1 SV=1 - [FBX22\_HUMAN]  
P01024 Complement C3 OS=Homo sapiens GN=C3 PE=1 SV=2 - [C3\_HUMAN]  
Q01581 Hydroxymethylglutaryl-CoA synthase, cytoplasmic OS=Homo sapiens GN=HMGS1 PE=1 SV=2 - [HMCS1\_HUMAN]  
Q16643 Drebrin OS=Homo sapiens GN=DNM1 PE=1 SV=4 - [DREB\_HUMAN]  
Q9H8Y8 Golgi reassembly-stacking protein 2 OS=Homo sapiens GN=GORASP2 PE=1 SV=3 - [GORS2\_HUMAN]  
Q9NZJ4 Sacsin OS=Homo sapiens GN=SACS PE=1 SV=2 - [SACS\_HUMAN]  
Q13123 Protein Red OS=Homo sapiens GN=IK PE=1 SV=3 - [RED\_HUMAN]  
Q9BSA4 Protein twenty homolog 2 OS=Homo sapiens GN=TTYH2 PE=1 SV=3 - [TTYH2\_HUMAN]  
Q14146 Unhealthy ribosome biogenesis protein 2 homolog OS=Homo sapiens GN=URB2 PE=2 SV=2 - [URB2\_HUMAN]  
Q724L5 Tetratricopeptide repeat protein 21B OS=Homo sapiens GN=TT21B PE=1 SV=2 - [TT21B\_HUMAN]  
P49746 Thrombospondin-3 OS=Homo sapiens GN=THBS3 PE=1 SV=1 - [TSP3\_HUMAN]  
Q14108 Lysosome membrane protein 2 OS=Homo sapiens GN=SCARB2 PE=1 SV=2 - [SCR2B\_HUMAN]  
Q147X3 N-alpha-acetyltransferase 30 OS=Homo sapiens GN=NAA30 PE=1 SV=1 - [NAA30\_HUMAN]  
Q01844 RNA-binding protein EWS OS=Homo sapiens GN=EWSR1 PE=1 SV=1 - [EWS\_HUMAN]  
Q16401 26S proteasome non-ATPase regulatory subunit 5 OS=Homo sapiens GN=PSMD5 PE=1 SV=3 - [PSMD5\_HUMAN]  
Q8TE59 A disintegrin and metalloproteinase with thrombospondin motifs 19 OS=Homo sapiens GN=ADAMTS19 PE=2 SV=2 - [ATS19\_HUMAN]

Q9Y5S2 Serine/threonine-protein kinase MRCK beta OS=Homo sapiens GN=CDC42BPB PE=1 SV=2 - [MRCKB\_HUMAN]  
P23468 Receptor-type tyrosine-protein phosphatase delta OS=Homo sapiens GN=PTPRD PE=1 SV=2 - [PTPRD\_HUMAN]  
P16885 1-phosphatidylinositol 4,5-bisphosphate phosphodiesterase gamma-2 OS=Homo sapiens GN=PLCG2 PE=1 SV=4 - [PLCG2\_HUMAN]  
Q9COE2 Exportin-4 OS=Homo sapiens GN=XP04 PE=1 SV=2 - [XP04\_HUMAN]  
Q9HR21 Plectstrin homology domain-containing family A member 1 OS=Homo sapiens GN=PLEKHA1 PE=1 SV=2 - [PKHA1\_HUMAN]  
O75882 Attractin OS=Homo sapiens GN=ATRN PE=1 SV=2 - [ATRN\_HUMAN]  
Q9BXB5 Oxytetracycline-binding protein-related protein 10 OS=Homo sapiens GN=OSBPL10 PE=1 SV=2 - [OSB10\_HUMAN]  
Q58FG1 Putative heat shock protein HSP 90-alpha A4 OS=Homo sapiens GN=HSP90AA4 PE=5 SV=1 - [HS904\_HUMAN]  
Q81V08 Phospholipase D3 OS=Homo sapiens GN=PLD3 PE=1 SV=1 - [PLD3\_HUMAN]  
Q8WVS4 WD repeat-containing protein 60 OS=Homo sapiens GN=WD60 PE=1 SV=3 - [WDR60\_HUMAN]  
P25686 DnaJ homolog subfamily B member 2 OS=Homo sapiens GN=DNAJB2 PE=1 SV=3 - [DNJB2\_HUMAN]  
Q7Z401 C-myc promoter-binding protein OS=Homo sapiens GN=DENND4A PE=1 SV=2 - [MYCPP\_HUMAN]  
Q9COB7 Transport and Golgi organization protein 6 homolog OS=Homo sapiens GN=TANGO6 PE=1 SV=2 - [TNG6\_HUMAN]  
Q9UHB6 LIM domain and actin-binding protein 1 OS=Homo sapiens GN=LIMA1 PE=1 SV=1 - [LIMA1\_HUMAN]  
O75147 Obscurin-like protein 1 OS=Homo sapiens GN=OBSL1 PE=1 SV=4 - [OBSL1\_HUMAN]  
Q3B726 DNA-directed RNA polymerase I subunit RPA43 OS=Homo sapiens GN=TWISTNB PE=1 SV=1 - [RPA43\_HUMAN]  
P11117 Lysosomal acid phosphatase OS=Homo sapiens GN=ACP2 PE=1 SV=3 - [PPAL\_HUMAN]  
Q81WU6 Extracellular sulfatase Sul1 OS=Homo sapiens GN=SULF1 PE=1 SV=1 - [SULF1\_HUMAN]  
Q8NFD5 AT-rich interactive domain-containing protein 1B OS=Homo sapiens GN=ARID1B PE=1 SV=2 - [ART1B\_HUMAN]  
O15027 Protein transport protein Sec16A OS=Homo sapiens GN=SEC16A PE=1 SV=3 - [SC16A\_HUMAN]  
O14727 Apoptotic protease-activating factor 1 OS=Homo sapiens GN=APAF1 PE=1 SV=2 - [APAF\_HUMAN]  
Q9NVG8 TBC1 domain family member 13 OS=Homo sapiens GN=TBC1D13 PE=1 SV=3 - [TBC13\_HUMAN]  
Q9NYJ8 TGF-beta-activated kinase 1 and MAP3K7-binding protein 2 OS=Homo sapiens GN=TAB2 PE=1 SV=1 - [TAB2\_HUMAN]  
Q9HZC0 Gigaxonin OS=Homo sapiens GN=GAX PE=1 SV=1 - [GAN\_HUMAN]  
P62256 Ubiquitin-conjugating enzyme E2 H OS=Homo sapiens GN=UBE2H PE=1 SV=1 - [UBE2H\_HUMAN]  
P10915 Hyaluronan and proteoglycan link protein 1 OS=Homo sapiens GN=HAPLN1 PE=2 SV=2 - [HPLN1\_HUMAN]  
Q96EB6 NAD-dependent protein deacetylase sirtuin-1 OS=Homo sapiens GN=SIRT1 PE=1 SV=2 - [SIRT1\_HUMAN]  
P11279 Lysosome-associated membrane glycoprotein 1 OS=Homo sapiens GN=LAMP1 PE=1 SV=3 - [LAMP1\_HUMAN]  
Q3ZCW2 Galectin-related protein OS=Homo sapiens GN=LGALS1 PE=1 SV=2 - [LEGL\_HUMAN]  
Q9NRZ9 Lymphoid-specific helicase OS=Homo sapiens GN=HELLS PE=1 SV=1 - [HELLS\_HUMAN]  
Q9Y4B4 Helicase ARI14 OS=Homo sapiens GN=RAD54L2 PE=1 SV=4 - [ARI14\_HUMAN]  
O43823 A-kinase anchor protein 8 OS=Homo sapiens GN=AKAP8 PE=1 SV=1 - [AKAP8\_HUMAN]  
O43719 HIV Tat-specific factor 1 OS=Homo sapiens GN=HTATSF1 PE=1 SV=1 - [HTSF1\_HUMAN]  
Q8WVU2 Cationic amino acid transporter 3 OS=Homo sapiens GN=SLC7A3 PE=1 SV=1 - [CTR3\_HUMAN]  
Q96RU2 Ubiquitin carboxyl-terminal hydrolase 28 OS=Homo sapiens GN=USP28 PE=1 SV=1 - [UBP28\_HUMAN]  
Q56P03 E2F-associated phosphoprotein OS=Homo sapiens GN=EAPP PE=1 SV=4 - [EAPP\_HUMAN]  
Q5JSL3 Dedicator of cytokinesis protein 11 OS=Homo sapiens GN=DOCK11 PE=1 SV=2 - [DOC11\_HUMAN]  
Q9PK07 Ankyrin OS=Homo sapiens GN=RAI14 PE=1 SV=2 - [RAI14\_HUMAN]  
Q6UX04 Peptidyl-prolyl cis-trans isomerase CWC27 homolog OS=Homo sapiens GN=CWC27 PE=1 SV=1 - [CWC27\_HUMAN]  
P12931 Proto-oncogene tyrosine-protein kinase Src OS=Homo sapiens GN=SRC PE=1 SV=3 - [SRC\_HUMAN]  
Q04721 Neurogenic locus notch homolog protein 2 OS=Homo sapiens GN=NOTCH2 PE=1 SV=3 - [NOTC2\_HUMAN]  
Q9HDB5 Neurexin-3-beta OS=Homo sapiens GN=NRXN3 PE=1 SV=4 - [NRX3B\_HUMAN]  
Q9P035 Very-long-chain (3R)-3-hydroxyacyl-CoA dehydratase 3 OS=Homo sapiens GN=HACD3 PE=1 SV=2 - [HACD3\_HUMAN]  
Q86T12 Dipeptidyl peptidase 9 OS=Homo sapiens GN=DPP9 PE=1 SV=3 - [DPP9\_HUMAN]  
Q8WU10 Pyridine nucleotide-disulfide oxidoreductase domain-containing protein 1 OS=Homo sapiens GN=PYROXD1 PE=1 SV=1 - [PYRD1\_HUMAN]  
Q5VWQ0 Round spermatid basic protein 1 OS=Homo sapiens GN=RSPB1 PE=1 SV=2 - [RSB1\_HUMAN]  
Q9UL42 Paraneoplastic antigen Ma2 OS=Homo sapiens GN=PNMA2 PE=1 SV=2 - [PNMA2\_HUMAN]  
Q99962 Endophilin-A1 OS=Homo sapiens GN=SH3GL2 PE=1 SV=1 - [SH3G2\_HUMAN]  
Q96A83 Collagen alpha-1(XVII) chain OS=Homo sapiens GN=COL26A1 PE=1 SV=1 - [COQA1\_HUMAN]  
P49593 Protein phosphatase 1F OS=Homo sapiens GN=PPM1F PE=1 SV=3 - [PPM1F\_HUMAN]  
P78316 Nucleolar protein 14 OS=Homo sapiens GN=NOP14 PE=1 SV=3 - [NOP14\_HUMAN]  
Q12913 Receptor-type tyrosine-protein phosphatase eta OS=Homo sapiens GN=PTPRJ PE=1 SV=3 - [PTPRJ\_HUMAN]  
Q13491 Neuronal membrane glycoprotein M6-b OS=Homo sapiens GN=GPM6B PE=1 SV=2 - [GPM6B\_HUMAN]  
P49590 Probable histidine--tRNA ligase, mitochondrial OS=Homo sapiens GN=HARS2 PE=1 SV=1 - [SYHM\_HUMAN]  
P0C0L4 Complement C4-A OS=Homo sapiens GN=C4A PE=1 SV=2 - [CO4A\_HUMAN]  
P02771 Alpha-fetoprotein OS=Homo sapiens GN=AFP PE=1 SV=1 - [FETA\_HUMAN]  
Q9HR57 5'-nucleotidase domain-containing protein 2 OS=Homo sapiens GN=NT5DC2 PE=1 SV=1 - [NT5D2\_HUMAN]  
Q9HAR2 Latrophilin-3 OS=Homo sapiens GN=LPHN3 PE=2 SV=2 - [LPHN3\_HUMAN]  
Q6P3W7 SCY1-like protein 2 OS=Homo sapiens GN=SCYL2 PE=1 SV=1 - [SCYL2\_HUMAN]  
O75155 Cullin-associated NEDD8-dissociated protein 2 OS=Homo sapiens GN=CAND2 PE=1 SV=3 - [CAND2\_HUMAN]  
Q27J81 Inverted formin-2 OS=Homo sapiens GN=INP2 PE=1 SV=2 - [INP2\_HUMAN]  
Q9Y5B6 PAX3- and PAX7-binding protein 1 OS=Homo sapiens GN=PAXBP1 PE=1 SV=2 - [PAXB1\_HUMAN]  
P14174 Macrophage migration inhibitory factor OS=Homo sapiens GN=MIF PE=1 SV=4 - [MIF\_HUMAN]  
P18858 DNA ligase 1 OS=Homo sapiens GN=LIG1 PE=1 SV=1 - [DNLI1\_HUMAN]  
Q15058 Kinesin-like protein KIF14 OS=Homo sapiens GN=KIF14 PE=1 SV=1 - [KIF14\_HUMAN]  
Q9UKV3 Apoptotic chromatin condensation inducer in the nucleus OS=Homo sapiens GN=ACIN1 PE=1 SV=2 - [ACINU\_HUMAN]  
P12259 Coagulation factor V OS=Homo sapiens GN=F5 PE=1 SV=4 - [FA5\_HUMAN]  
Q96D77 Zinc finger and BTB domain-containing protein 10 OS=Homo sapiens GN=ZBTB10 PE=1 SV=2 - [ZBT10\_HUMAN]  
Q14562 ATP-dependent RNA helicase DHX8 OS=Homo sapiens GN=DHX8 PE=1 SV=1 - [DHX8\_HUMAN]  
Q86V13 Ras GTPase-activating-like protein IQGAP3 OS=Homo sapiens GN=IQGAP3 PE=1 SV=2 - [IQGA3\_HUMAN]  
Q12888 Tumor suppressor p53-binding protein 1 OS=Homo sapiens GN=TP53BP1 PE=1 SV=2 - [TP53B\_HUMAN]  
Q93074 Mediator of RNA polymerase II transcription subunit 12 OS=Homo sapiens GN=MED12 PE=1 SV=4 - [MED12\_HUMAN]  
O43741 5'-AMP-activated protein kinase subunit beta-2 OS=Homo sapiens GN=PRKAB2 PE=1 SV=1 - [AAKB2\_HUMAN]  
Q60879 Protein diaphanous homolog 2 OS=Homo sapiens GN=DIAH2 PE=1 SV=1 - [DIAP2\_HUMAN]  
Q4ZH64 Fibronectin type III domain-containing protein 1 OS=Homo sapiens GN=FNDC1 PE=2 SV=4 - [FNDC1\_HUMAN]  
Q81YB5 Stromal membrane-associated protein 1 OS=Homo sapiens GN=SMAP1 PE=1 SV=2 - [SMAP1\_HUMAN]  
Q9UK18 Serine/threonine-protein kinase tousled-like 1 OS=Homo sapiens GN=TLK1 PE=1 SV=2 - [TLK1\_HUMAN]  
Q2PPJ7 Ral GTPase-activating protein subunit alpha-2 OS=Homo sapiens GN=RALGAP2 PE=1 SV=2 - [RGA2\_HUMAN]  
Q96EK7 Constitutive coactivator of peroxisome proliferator-activated receptor gamma OS=Homo sapiens GN=FAM120B PE=1 SV=1 - [F120B\_HUMAN]  
Q9NYK5 39S ribosomal protein L39, mitochondrial OS=Homo sapiens GN=MRPL39 PE=1 SV=3 - [RM39\_HUMAN]  
Q9UHF1 Epidermal growth factor-like protein 7 OS=Homo sapiens GN=EGFL7 PE=1 SV=3 - [EGFL7\_HUMAN]  
Q9HCN3 Transmembrane protein 8A OS=Homo sapiens GN=TMEM8A PE=1 SV=3 - [TM8A\_HUMAN]  
O94804 Serine/threonine-protein kinase 10 OS=Homo sapiens GN=STK10 PE=1 SV=1 - [STK10\_HUMAN]  
O60343 TBC1 domain family member 4 OS=Homo sapiens GN=TBC1D4 PE=1 SV=2 - [TBCD4\_HUMAN]  
O60524 Nuclear export mediator factor NEMF OS=Homo sapiens GN=NEMF PE=1 SV=4 - [NEMF\_HUMAN]  
Q2TAL8 Glutamine-rich protein 1 OS=Homo sapiens GN=QRICH1 PE=1 SV=1 - [QRIC1\_HUMAN]  
P09486 SPARC OS=Homo sapiens GN=SPARC PE=1 SV=1 - [SPRC\_HUMAN]  
Q13510 Acid ceramidase OS=Homo sapiens GN=ASAH1 PE=1 SV=5 - [ASAH1\_HUMAN]  
P00742 Coagulation factor X OS=Homo sapiens GN=F10 PE=1 SV=2 - [FA10\_HUMAN]  
P35240 Merlin OS=Homo sapiens GN=NF2 PE=1 SV=1 - [MERL\_HUMAN]  
Q9NVN8 Guanine nucleotide-binding protein-like 3-like protein OS=Homo sapiens GN=GNL3L PE=1 SV=1 - [GNL3L\_HUMAN]  
Q4KMP7 TBC1 domain family member 10B OS=Homo sapiens GN=TBC1D10B PE=1 SV=3 - [TB10B\_HUMAN]  
Q6ZRS2 Helicase SRCAP OS=Homo sapiens GN=SRCAP PE=1 SV=3 - [SRCAP\_HUMAN]  
Q9BW71 HIRA-interacting protein 3 OS=Homo sapiens GN=HIRIP3 PE=1 SV=3 - [HIRP3\_HUMAN]  
Q9HOR1 AP-5 complex subunit mu-1 OS=Homo sapiens GN=AP5M1 PE=1 SV=2 - [AP5M1\_HUMAN]  
Q9Y274 Type 2 lactosamine alpha-2,3-sialyltransferase OS=Homo sapiens GN=ST3GAL6 PE=1 SV=1 - [STA10\_HUMAN]  
Q6A108 HEAT repeat-containing protein 6 OS=Homo sapiens GN=HEATR6 PE=1 SV=1 - [HEAT6\_HUMAN]  
Q2TAZ0 Autophagy-related protein 2 homolog A OS=Homo sapiens GN=ATG2A PE=1 SV=3 - [ATG2A\_HUMAN]  
Q55V26 Zinc finger MYM-type protein 1 OS=Homo sapiens GN=ZMYM1 PE=2 SV=1 - [ZMYM1\_HUMAN]  
Q15054 DNA polymerase delta subunit 3 OS=Homo sapiens GN=POLD3 PE=1 SV=2 - [DPOD3\_HUMAN]  
P56199 Integrin alpha-1 OS=Homo sapiens GN=ITGA1 PE=1 SV=2 - [ITA1\_HUMAN]  
Q00325 Phosphate carrier protein, mitochondrial OS=Homo sapiens GN=SLC25A3 PE=1 SV=2 - [MPCP\_HUMAN]  
Q14149 MORC family CW-type zinc finger protein 3 OS=Homo sapiens GN=MORC3 PE=1 SV=3 - [MORC3\_HUMAN]  
Q8NEZ3 WD repeat-containing protein 19 OS=Homo sapiens GN=WDR19 PE=1 SV=2 - [WDR19\_HUMAN]  
P18075 Bone morphogenetic protein 7 OS=Homo sapiens GN=BMP7 PE=1 SV=1 - [BMP7\_HUMAN]  
P51531 Probable global transcription activator SNF2L2 OS=Homo sapiens GN=SMARCA2 PE=1 SV=2 - [SMCA2\_HUMAN]  
Q15527 Surf1 locus protein 2 OS=Homo sapiens GN=SURF2 PE=1 SV=3 - [SURF2\_HUMAN]  
Q9BT99 WW domain-containing adapter protein with coiled-coil OS=Homo sapiens GN=WAC PE=1 SV=3 - [WAC\_HUMAN]  
Q0JR29 F-BAR domain only protein 2 OS=Homo sapiens GN=FCHO2 PE=1 SV=2 - [FCHO2\_HUMAN]  
P78357 Contactin-associated protein 1 OS=Homo sapiens GN=CNTNAP1 PE=1 SV=1 - [CNTP1\_HUMAN]  
P85037 Forkhead box protein K1 OS=Homo sapiens GN=FOXP1 PE=1 SV=1 - [FOXP1\_HUMAN]  
Q96PY5 Formin-like protein 2 OS=Homo sapiens GN=FMNL2 PE=1 SV=3 - [FMNL2\_HUMAN]  
O75792 Ribonuclease H2 subunit A OS=Homo sapiens GN=RNASEH2A PE=1 SV=2 - [RNH2A\_HUMAN]  
Q6DKJ4 Nucleoredoxin OS=Homo sapiens GN=NXN PE=1 SV=2 - [NXN\_HUMAN]  
Q9NWX5 Ankyrin repeat and SOCS box protein 6 OS=Homo sapiens GN=ASB6 PE=1 SV=2 - [ASB6\_HUMAN]

Q9UBF8 Phosphatidylinositol 4-kinase beta OS=Homo sapiens GN=PI4KB PE=1 SV=1 - [PI4KB\_HUMAN]  
 075122 CLIP-associating protein 2 OS=Homo sapiens GN=CLASP2 PE=1 SV=2 - [CLASP2\_HUMAN]  
 060566 Mitotic checkpoint serine/threonine-protein kinase BUB1 beta OS=Homo sapiens GN=BUB1B PE=1 SV=3 - [BUB1B\_HUMAN]  
 09BVC5 Ashwin OS=Homo sapiens GN=C2orf49 PE=1 SV=1 - [ASHWN\_HUMAN]  
 P48740 Mannan-binding lectin serine protease 1 OS=Homo sapiens GN=MASP1 PE=1 SV=3 - [MASP1\_HUMAN]  
 Q96P70 Importin-9 OS=Homo sapiens GN=IPO9 PE=1 SV=3 - [IPO9\_HUMAN]  
 Q9HCK8 Chromodomain-helicase-DNA-binding protein 8 OS=Homo sapiens GN=CHD8 PE=1 SV=5 - [CHD8\_HUMAN]  
 Q9P2H3 Intracellular transport protein 80 homolog OS=Homo sapiens GN=IFT80 PE=1 SV=3 - [IFT80\_HUMAN]  
 Q9Y4E1 WASH complex subunit FAM21C OS=Homo sapiens GN=FAM21C PE=1 SV=3 - [FAM21C\_HUMAN]  
 P81877 Single-stranded DNA-binding protein 2 OS=Homo sapiens GN=SSBP2 PE=1 SV=2 - [SSBP2\_HUMAN]  
 Q61N85 Serine/threonine-protein phosphatase 4 regulatory subunit 3A OS=Homo sapiens GN=SMER1 PE=1 SV=1 - [P4R3A\_HUMAN]  
 Q10469 Alpha-1,6-mannosyl-glycoprotein 2-beta-N-acetylglucosaminyltransferase OS=Homo sapiens GN=MGAT2 PE=1 SV=1 - [MGAT2\_HUMAN]  
 Q641Q2 WASH complex subunit FAM21A OS=Homo sapiens GN=FAM21A PE=2 SV=3 - [FAM21A\_HUMAN]  
 Q9NRG4 N-lysine methyltransferase SMYD2 OS=Homo sapiens GN=SMYD2 PE=1 SV=2 - [SMYD2\_HUMAN]  
 P17405 Sphingomyelin phosphodiesterase OS=Homo sapiens GN=SMPD1 PE=1 SV=4 - [ASM\_HUMAN]  
 P21359 Neurofibromin OS=Homo sapiens GN=NF1 PE=1 SV=2 - [NF1\_HUMAN]  
 A1X283 SH3 and PX domain-containing protein 2B OS=Homo sapiens GN=SH3PX2B PE=1 SV=3 - [SPD2B\_HUMAN]  
 Q94817 Ubiquitin-like protein ATG12 OS=Homo sapiens GN=ATG12 PE=1 SV=1 - [ATG12\_HUMAN]  
 Q96Q42 Alsin OS=Homo sapiens GN=ALS2 PE=1 SV=2 - [ALS2\_HUMAN]  
 P02452 Collagen alpha-1(I) chain OS=Homo sapiens GN=COL1A1 PE=1 SV=5 - [COL1A1\_HUMAN]  
 Q15048 Leucine-rich repeat-containing protein 14 OS=Homo sapiens GN=LRR14 PE=2 SV=1 - [LRC14\_HUMAN]  
 Q96TA1 Niban-like protein 1 OS=Homo sapiens GN=FAM129B PE=1 SV=3 - [NIBL1\_HUMAN]  
 Q9P077 Transmembrane protein 9 OS=Homo sapiens GN=TMEM9 PE=1 SV=1 - [TMEM9\_HUMAN]  
 014662 Syntaxin-16 OS=Homo sapiens GN=STX16 PE=1 SV=3 - [STX16\_HUMAN]  
 075962 Triple functional domain protein OS=Homo sapiens GN=TRIO PE=1 SV=2 - [TRIO\_HUMAN]  
 P13473 Lysosome-associated membrane glycoprotein 2 OS=Homo sapiens GN=LAMP2 PE=1 SV=2 - [LAMP2\_HUMAN]  
 Q9COH2 Protein twenty homolog 3 OS=Homo sapiens GN=TYH3 PE=1 SV=3 - [TYH3\_HUMAN]  
 Q5V725 Serine/threonine-protein kinase MRCK alpha OS=Homo sapiens GN=CDC42BP4 PE=1 SV=1 - [MRCKA\_HUMAN]  
 Q96R06 Sperm-associated antigen 5 OS=Homo sapiens GN=SPAG5 PE=1 SV=2 - [SPAG5\_HUMAN]  
 Q5D862 Filaggrin-2 OS=Homo sapiens GN=PLG2 PE=1 SV=1 - [PLA2\_HUMAN]  
 Q9UBG0 C-type mannose receptor 2 OS=Homo sapiens GN=MRC2 PE=1 SV=2 - [MRC2\_HUMAN]  
 Q13367 AP-3 complex subunit beta-2 OS=Homo sapiens GN=AP3B2 PE=1 SV=2 - [AP3B2\_HUMAN]  
 Q9BUZ4 TNF receptor-associated factor 4 OS=Homo sapiens GN=TRAF4 PE=1 SV=1 - [TRAF4\_HUMAN]  
 Q5T5X7 BEN domain-containing protein 3 OS=Homo sapiens GN=BEND3 PE=1 SV=1 - [BEND3\_HUMAN]  
 P98175 RNA-binding protein 10 OS=Homo sapiens GN=RBM10 PE=1 SV=3 - [RBM10\_HUMAN]  
 P35626 Beta-adrenergic receptor kinase 2 OS=Homo sapiens GN=ARBRK2 PE=1 SV=2 - [ARBRK2\_HUMAN]  
 Q9ULX6 A-kinase anchor protein 8-like OS=Homo sapiens GN=AKAP8L PE=1 SV=3 - [AKP8L\_HUMAN]  
 043422 52 kDa repressor of the inhibitor of the protein kinase OS=Homo sapiens GN=PRKRIPR PE=1 SV=2 - [P52K\_HUMAN]  
 Q14520 Hyaluronan-binding protein 2 OS=Homo sapiens GN=HABP2 PE=1 SV=1 - [HABP2\_HUMAN]  
 Q15648 Mediator of RNA polymerase II transcription subunit 1 OS=Homo sapiens GN=MED1 PE=1 SV=4 - [MED1\_HUMAN]  
 P49790 Nuclear pore complex protein Nup153 OS=Homo sapiens GN=NUP153 PE=1 SV=2 - [NUP153\_HUMAN]  
 Q9V6A5 Transforming acidic coiled-coil-containing protein 3 OS=Homo sapiens GN=TACC3 PE=1 SV=1 - [TACC3\_HUMAN]  
 014497 AT-rich interactive domain-containing protein 1A OS=Homo sapiens GN=ARID1A PE=1 SV=3 - [ARI1A\_HUMAN]  
 075175 CCR4-NOT transcription complex subunit 3 OS=Homo sapiens GN=CNOT3 PE=1 SV=1 - [CNOT3\_HUMAN]  
 Q8ND56 Protein LSM14 homolog A OS=Homo sapiens GN=LSM14A PE=1 SV=3 - [LS14A\_HUMAN]  
 043670 BUB3-interacting and GLEBS motif-containing protein ZNF207 OS=Homo sapiens GN=ZNF207 PE=1 SV=1 - [ZN207\_HUMAN]  
 Q14157 Ubiquitin-associated protein 2-like OS=Homo sapiens GN=UBAP2L PE=1 SV=2 - [UBP2L\_HUMAN]  
 Q6Z712 E3 ubiquitin-protein ligase UBR3 OS=Homo sapiens GN=UBR3 PE=2 SV=2 - [UBR3\_HUMAN]  
 043432 Eukaryotic translation initiation factor 4 gamma 3 OS=Homo sapiens GN=EIF4G3 PE=1 SV=2 - [IF4G3\_HUMAN]  
 000459 Phosphatidylinositol 3-kinase regulatory subunit beta OS=Homo sapiens GN=PIK3R2 PE=1 SV=2 - [P85B\_HUMAN]  
 Q16787 Laminin subunit alpha-3 OS=Homo sapiens GN=LAMA3 PE=1 SV=2 - [LAMA3\_HUMAN]  
 Q9Y485 DmX-like protein 1 OS=Homo sapiens GN=DMXL1 PE=1 SV=3 - [DMXL1\_HUMAN]  
 Q9Y613 FH1/FH2 domain-containing protein 1 OS=Homo sapiens GN=FHOD1 PE=1 SV=3 - [FHOD1\_HUMAN]  
 Q53H47 Histone-lysine N-methyltransferase SETMAR OS=Homo sapiens GN=SETMAR PE=1 SV=2 - [SETMR\_HUMAN]  
 Q9C0C7 Activating molecule in BECN1-regulated autophagy protein 1 OS=Homo sapiens GN=AMBRA1 PE=1 SV=2 - [AMRA1\_HUMAN]  
 Q9Y6Z7 Collectin-10 OS=Homo sapiens GN=COLEC10 PE=2 SV=2 - [COL10\_HUMAN]  
 P35749 Myosin-11 OS=Homo sapiens GN=MYH11 PE=1 SV=3 - [MYH11\_HUMAN]  
 Q9NZ17 Upstream-binding protein 1 OS=Homo sapiens GN=UBP1 PE=1 SV=1 - [UBIP1\_HUMAN]  
 P0C339 POTE ankyrin domain family member J OS=Homo sapiens GN=POTEJ PE=3 SV=1 - [POTEJ\_HUMAN]  
 Q86TP1 Protein prune homolog OS=Homo sapiens GN=PRUNE PE=1 SV=2 - [PRUNE\_HUMAN]  
 Q9H081 Protein MTS12 homolog OS=Homo sapiens GN=MTS12 PE=1 SV=1 - [MTS12\_HUMAN]  
 P29590 Protein PML OS=Homo sapiens GN=PML PE=1 SV=3 - [PML\_HUMAN]  
 060636 Tetraspanin-2 OS=Homo sapiens GN=TSPAN2 PE=2 SV=2 - [TSN2\_HUMAN]  
 P35658 Nuclear pore complex protein Nup214 OS=Homo sapiens GN=NUP214 PE=1 SV=2 - [NUP214\_HUMAN]  
 Q9UNK0 Syntaxin-8 OS=Homo sapiens GN=STX8 PE=1 SV=2 - [STX8\_HUMAN]  
 Q96013 Serine/threonine-protein kinase PAK 4 OS=Homo sapiens GN=PAK4 PE=1 SV=1 - [PAK4\_HUMAN]  
 Q7Z460 CLIP-associating protein 1 OS=Homo sapiens GN=CLASP1 PE=1 SV=1 - [CLAP1\_HUMAN]  
 Q14767 Latent-transforming growth factor beta-binding protein 2 OS=Homo sapiens GN=LTPB2 PE=1 SV=3 - [LTBP2\_HUMAN]  
 060504 Vinexin OS=Homo sapiens GN=SORSB3 PE=1 SV=2 - [VINEX\_HUMAN]  
 Q81XT5 RNA-binding protein 12B OS=Homo sapiens GN=RBM12B PE=1 SV=2 - [RB12B\_HUMAN]  
 P05997 Collagen alpha-2(V) chain OS=Homo sapiens GN=COL5A2 PE=1 SV=3 - [COSA2\_HUMAN]  
 P16383 GC-rich sequence DNA-binding factor 2 OS=Homo sapiens GN=GCFC2 PE=1 SV=2 - [GCFC2\_HUMAN]  
 Q7Z5N4 Protein sidekick-1 OS=Homo sapiens GN=SDK1 PE=2 SV=3 - [SDK1\_HUMAN]  
 Q96RV7 Intracellular transport protein 140 homolog OS=Homo sapiens GN=IFT140 PE=1 SV=1 - [IFT140\_HUMAN]  
 Q43318 Mitogen-activated protein kinase kinase 7 OS=Homo sapiens GN=MAP3K7 PE=1 SV=1 - [M3K7\_HUMAN]  
 P49454 Centromere protein F OS=Homo sapiens GN=CENPF PE=1 SV=2 - [CENPF\_HUMAN]  
 Q2WPK5 Cytoplasmic tRNA 2-thiolation protein 2 OS=Homo sapiens GN=CTU2 PE=1 SV=1 - [CTU2\_HUMAN]  
 Q6PF126 Protein SHQ1 homolog OS=Homo sapiens GN=SHQ1 PE=1 SV=2 - [SHQ1\_HUMAN]  
 Q8N7H5 RNA polymerase II-associated factor 1 homolog OS=Homo sapiens GN=PAP1 PE=1 SV=2 - [PAP1\_HUMAN]  
 Q709C8 Vacuolar protein sorting-associated protein 13C OS=Homo sapiens GN=VPS13C PE=1 SV=1 - [VP13C\_HUMAN]  
 Q5JSH3 WD repeat-containing protein 44 OS=Homo sapiens GN=WDR44 PE=1 SV=1 - [WDR44\_HUMAN]  
 Q9H813 Transmembrane protein 206 OS=Homo sapiens GN=TMEM206 PE=1 SV=1 - [TM206\_HUMAN]  
 Q9UBP4 Dickkopf-related protein 3 OS=Homo sapiens GN=DKK3 PE=1 SV=2 - [DKK3\_HUMAN]  
 P54756 Ephrin type-A receptor 5 OS=Homo sapiens GN=EPHA5 PE=1 SV=3 - [EPHA5\_HUMAN]  
 Q6Z5Z5 Rho guanine nucleotide exchange factor 18 OS=Homo sapiens GN=ARHGEF18 PE=1 SV=3 - [ARHG1\_HUMAN]  
 Q9Y5T5 Ubiquitin carboxyl-terminal hydrolase 16 OS=Homo sapiens GN=USP16 PE=1 SV=1 - [UBP16\_HUMAN]  
 Q9Y5V3 Melanoma-associated antigen D1 OS=Homo sapiens GN=MAGED1 PE=1 SV=3 - [MAGD1\_HUMAN]  
 P47712 Cytosolic phospholipase A2 OS=Homo sapiens GN=PLA2G4A PE=1 SV=2 - [PA24A\_HUMAN]  
 Q92544 Transmembrane 9 superfamily member 4 OS=Homo sapiens GN=TM9SF4 PE=1 SV=2 - [TM9S4\_HUMAN]  
 Q96HC4 PDZ and LIM domain protein 5 OS=Homo sapiens GN=PDLLIM5 PE=1 SV=5 - [PDL15\_HUMAN]  
 P49756 RNA-binding protein 25 OS=Homo sapiens GN=RBM25 PE=1 SV=3 - [RBM25\_HUMAN]  
 Q9BWT3 Poly(A) polymerase gamma OS=Homo sapiens GN=PAPOLG PE=1 SV=2 - [PAPOG\_HUMAN]  
 Q2VBP7 AP-5 complex subunit beta-1 OS=Homo sapiens GN=AP5B1 PE=1 SV=4 - [AP5B1\_HUMAN]  
 Q15059 Bromodomain-containing protein 3 OS=Homo sapiens GN=BRD3 PE=1 SV=1 - [BRD3\_HUMAN]  
 Q7Z7M0 Multiple epidermal growth factor-like domains protein 8 OS=Homo sapiens GN=MEGF8 PE=1 SV=2 - [MEGF8\_HUMAN]  
 Q8NFP9 Neurobeachin OS=Homo sapiens GN=NBEA PE=1 SV=3 - [NBEA\_HUMAN]  
 Q4LE39 AT-rich interactive domain-containing protein 4B OS=Homo sapiens GN=ARID4B PE=1 SV=2 - [ARI4B\_HUMAN]  
 Q9Y5U2 Protein TSSC4 OS=Homo sapiens GN=TSSC4 PE=1 SV=3 - [TSSC4\_HUMAN]  
 Q13427 Peptidyl-prolyl cis-trans isomerase G OS=Homo sapiens GN=PP1G PE=1 SV=2 - [PP1G\_HUMAN]  
 Q07002 Cyclin-dependent kinase 18 OS=Homo sapiens GN=CDK18 PE=1 SV=3 - [CDK18\_HUMAN]  
 Q9BVS4 Serine/threonine-protein kinase RIO2 OS=Homo sapiens GN=RIOK2 PE=1 SV=2 - [RIOK2\_HUMAN]  
 Q9C0B1 Alpha-ketoglutarate-dependent dioxygenase FTO OS=Homo sapiens GN=FTO PE=1 SV=3 - [FTO\_HUMAN]  
 Q8NH67 ADP-ribosylation factor GTPase-activating protein 2 OS=Homo sapiens GN=ARFGAP2 PE=1 SV=1 - [ARFG2\_HUMAN]  
 Q8N4C8 Misshapen-like kinase 1 OS=Homo sapiens GN=MINK1 PE=1 SV=2 - [MINK1\_HUMAN]  
 Q5VYS8 Terminal uridylyltransferase 7 OS=Homo sapiens GN=ZCCHC6 PE=1 SV=1 - [TUT7\_HUMAN]  
 Q68DK2 Zinc finger FYVE domain-containing protein 26 OS=Homo sapiens GN=ZFYVE26 PE=1 SV=3 - [ZFY26\_HUMAN]  
 Q99941 Cyclic AMP-dependent transcription factor ATF-6 beta OS=Homo sapiens GN=ATF6B PE=1 SV=2 - [ATF6B\_HUMAN]  
 Q15283 Ras GTPase-activating protein 2 OS=Homo sapiens GN=RASA2 PE=1 SV=3 - [RASA2\_HUMAN]  
 Q13136 Liprin-alpha-1 OS=Homo sapiens GN=PPP1A1 PE=1 SV=1 - [LIPAL1\_HUMAN]  
 Q9ULQ0 Striatin-interacting protein 2 OS=Homo sapiens GN=STRIP2 PE=1 SV=2 - [STRP2\_HUMAN]  
 Q14563 Semaphorin-3A OS=Homo sapiens GN=SEMA3A PE=1 SV=1 - [SEMA3A\_HUMAN]  
 060551 Glycylpeptide N-tetradecanoyltransferase 2 OS=Homo sapiens GN=NMT2 PE=1 SV=1 - [NMT2\_HUMAN]  
 060831 PRAL family protein 2 OS=Homo sapiens GN=PRAF2 PE=1 SV=1 - [PRAF2\_HUMAN]  
 Q96MX6 WD repeat-containing protein 92 OS=Homo sapiens GN=WDR92 PE=1 SV=1 - [WDR92\_HUMAN]  
 Q9UNN5 FAS-associated factor 1 OS=Homo sapiens GN=FAF1 PE=1 SV=2 - [FAF1\_HUMAN]

Q15751 Probable E3 ubiquitin-protein ligase HERC1 OS=Homo sapiens GN=HERC1 PE=1 SV=2 - [HERC1\_HUMAN]  
Q6K79 Nipped-B-like protein OS=Homo sapiens GN=NIPBL PE=1 SV=2 - [NIPBL\_HUMAN]  
Q6V017 Protocadherin Fat 4 OS=Homo sapiens GN=FAT4 PE=1 SV=2 - [FAT4\_HUMAN]  
Q75493 Carbonic anhydrase-related protein 11 OS=Homo sapiens GN=CA11 PE=1 SV=2 - [CAH11\_HUMAN]  
P23470 Receptor-type tyrosine-protein phosphatase gamma OS=Homo sapiens GN=PTPRG PE=1 SV=4 - [PTPRG\_HUMAN]  
O15550 Lysine-specific demethylase 6A OS=Homo sapiens GN=KDM6A PE=1 SV=2 - [KDM6A\_HUMAN]  
O94915 Protein furry homolog-like OS=Homo sapiens GN=FRYL PE=1 SV=2 - [FRYL\_HUMAN]  
O95544 NAD kinase OS=Homo sapiens GN=NADK PE=1 SV=1 - [NADK\_HUMAN]  
Q92554 Engulfment and cell motility protein 1 OS=Homo sapiens GN=ELMO1 PE=1 SV=2 - [ELMO1\_HUMAN]  
Q99523 Sortilin OS=Homo sapiens GN=SORT1 PE=1 SV=3 - [SORT\_HUMAN]  
Q8TEU7 Rap guanine nucleotide exchange factor 6 OS=Homo sapiens GN=RAPGEF6 PE=1 SV=2 - [RPGF6\_HUMAN]  
O43379 WD repeat-containing protein 62 OS=Homo sapiens GN=WDR62 PE=1 SV=4 - [WDR62\_HUMAN]  
O15047 Histone-lysine N-methyltransferase SETD1A OS=Homo sapiens GN=SETD1A PE=1 SV=3 - [SETD1A\_HUMAN]  
Q5V289 DENN domain-containing protein 4C OS=Homo sapiens GN=DENN4C PE=1 SV=2 - [DEN4C\_HUMAN]  
Q9UIQ6 Leucyl-cystinyl aminopeptidase OS=Homo sapiens GN=LNPEP PE=1 SV=3 - [LCAP\_HUMAN]  
Q9COB0 RING finger protein unkeft homolog OS=Homo sapiens GN=UNK PE=1 SV=2 - [UNK\_HUMAN]  
P29558 RNA-binding motif, single-stranded-interacting protein 1 OS=Homo sapiens GN=RBMS1 PE=1 SV=3 - [RBMS1\_HUMAN]  
Q4VCS5 Angiomotin OS=Homo sapiens GN=AMOT PE=1 SV=1 - [AMOT\_HUMAN]  
Q14004 Cyclin-dependent kinase 13 OS=Homo sapiens GN=CDK13 PE=1 SV=2 - [CDK13\_HUMAN]  
Q08722 Leukocyte surface antigen CD47 OS=Homo sapiens GN=CD47 PE=1 SV=1 - [CD47\_HUMAN]  
Q969F9 Hermansky-Pudlak syndrome 3 protein OS=Homo sapiens GN=HPS3 PE=1 SV=1 - [HPS3\_HUMAN]  
Q96RE7 Nucleus accumbens-associated protein 1 OS=Homo sapiens GN=NACC1 PE=1 SV=1 - [NACC1\_HUMAN]  
Q9C0D5 Protein TANC1 OS=Homo sapiens GN=TANC1 PE=1 SV=3 - [TANC1\_HUMAN]  
P01031 Complement C5 OS=Homo sapiens GN=C5 PE=1 SV=4 - [C05\_HUMAN]  
Q9UQ35 Serine/arginine repetitive matrix protein 2 OS=Homo sapiens GN=SRRM2 PE=1 SV=2 - [SRRM2\_HUMAN]  
Q9H4Z3 Phosphorylated CTD-interacting factor 1 OS=Homo sapiens GN=PCIF1 PE=1 SV=1 - [PCIF1\_HUMAN]  
Q15345 Leucine-rich repeat-containing protein 41 OS=Homo sapiens GN=LRRC41 PE=1 SV=3 - [LR41\_HUMAN]  
Q5W0B1 RING finger protein 219 OS=Homo sapiens GN=RFN219 PE=1 SV=1 - [RN219\_HUMAN]  
P23434 Glycine cleavage system H protein, mitochondrial OS=Homo sapiens GN=GCSH PE=1 SV=2 - [GCSH\_HUMAN]  
Q9Y4D8 Probable E3 ubiquitin-protein ligase HECTD4 OS=Homo sapiens GN=HECTD4 PE=1 SV=5 - [HECTD4\_HUMAN]  
Q9UKP4 A disintegrin and metalloproteinase with thrombospondin motifs 7 OS=Homo sapiens GN=ADAMTS7 PE=1 SV=2 - [AT57\_HUMAN]  
Q81W23 Ankyrin repeat and KH domain-containing protein 1 OS=Homo sapiens GN=ANKHD1 PE=1 SV=1 - [ANKH1\_HUMAN]  
Q96125 Splicing factor 45 OS=Homo sapiens GN=RBM17 PE=1 SV=1 - [SPF45\_HUMAN]  
O94888 UB domain-containing protein 7 OS=Homo sapiens GN=UBXN7 PE=1 SV=2 - [UBXN7\_HUMAN]  
Q81ZP7 Heparan-sulfate 6-O-sulfotransferase 3 OS=Homo sapiens GN=HS6ST3 PE=2 SV=3 - [H6ST3\_HUMAN]  
O00763 Acetyl-CoA carboxylase 2 OS=Homo sapiens GN=ACACB PE=1 SV=3 - [ACACB\_HUMAN]  
Q14CX7 N-alpha-acetyltransferase 25, NatB auxiliary subunit OS=Homo sapiens GN=NAA25 PE=1 SV=1 - [NAA25\_HUMAN]  
Q75QNZ Integrator complex subunit 8 OS=Homo sapiens GN=INTS8 PE=1 SV=1 - [INT8\_HUMAN]  
O75145 Liprin-alpha-3 OS=Homo sapiens GN=PPP1A3 PE=1 SV=3 - [LIPA3\_HUMAN]  
O94782 Ubiquitin carboxyl-terminal hydrolase 1 OS=Homo sapiens GN=USP1 PE=1 SV=1 - [UBP1\_HUMAN]  
Q12830 Nucleosome-remodeling factor subunit BPTF OS=Homo sapiens GN=BPTF PE=1 SV=3 - [BPTF\_HUMAN]  
Q58WV2 DDB1- and CUL4-associated factor 6 OS=Homo sapiens GN=DCAF6 PE=1 SV=1 - [DCAF6\_HUMAN]  
Q15435 Protein phosphatase 1 regulatory subunit 7 OS=Homo sapiens GN=PPP1R7 PE=1 SV=1 - [PP1R7\_HUMAN]  
P33527 Multidrug resistance-associated protein 1 OS=Homo sapiens GN=ABCC1 PE=1 SV=3 - [MRP1\_HUMAN]  
Q81195 Transmembrane protein 192 OS=Homo sapiens GN=TMEM192 PE=1 SV=1 - [TM192\_HUMAN]  
P02462 Collagen alpha-1(IV) chain OS=Homo sapiens GN=COL4A1 PE=1 SV=3 - [C04A1\_HUMAN]  
Q3V6T2 Girdin OS=Homo sapiens GN=CCDC88A PE=1 SV=2 - [GRDN\_HUMAN]  
Q8WQ0 PH-interacting protein OS=Homo sapiens GN=PHIP PE=1 SV=2 - [PHIP\_HUMAN]  
Q5V152 Regulation of nuclear pre-mRNA domain-containing protein 2 OS=Homo sapiens GN=RPRED2 PE=1 SV=1 - [RPRED2\_HUMAN]  
O43464 Serine protease HTRA2, mitochondrial OS=Homo sapiens GN=HTRA2 PE=1 SV=2 - [HTRA2\_HUMAN]  
Q7Z3K3 Pogo transposable element with ZNF domain OS=Homo sapiens GN=POGZ PE=1 SV=2 - [POGZ\_HUMAN]  
Q9UGR2 Zinc finger CCHC domain-containing protein 7B OS=Homo sapiens GN=ZC3H7B PE=1 SV=1 - [Z3H7B\_HUMAN]  
Q9ULI3 Protein HEG homolog 1 OS=Homo sapiens GN=HEG1 PE=1 SV=3 - [HEG1\_HUMAN]  
P16112 Aggrecan core protein OS=Homo sapiens GN=ACAN PE=1 SV=2 - [PGCA\_HUMAN]  
Q9Y608 Leucine-rich repeat flightless-interacting protein 2 OS=Homo sapiens GN=LRRFP2 PE=1 SV=1 - [LRRFP2\_HUMAN]  
Q93075 Putative deoxyribonuclease TATDN2 OS=Homo sapiens GN=TATDN2 PE=2 SV=2 - [TATDN2\_HUMAN]  
P56159 GDNF family receptor alpha-1 OS=Homo sapiens GN=GFR1 PE=2 SV=2 - [GFR1\_HUMAN]  
P18850 Cyclic AMP-dependent transcription factor ATF-6 alpha OS=Homo sapiens GN=ATF6 PE=1 SV=3 - [ATF6A\_HUMAN]  
Q9ULP9 TBC1 domain family member 24 OS=Homo sapiens GN=TBC1D24 PE=1 SV=2 - [TBC24\_HUMAN]  
Q9BPZ7 Target of rapamycin complex 2 subunit MAPKAP1 OS=Homo sapiens GN=MAPKAP1 PE=1 SV=2 - [SIN1\_HUMAN]  
Q9UL54 Serine/threonine-protein kinase TAO2 OS=Homo sapiens GN=TAO2 PE=1 SV=2 - [TAO2\_HUMAN]  
Q13480 GRB2-associated-binding protein 1 OS=Homo sapiens GN=GAB1 PE=1 SV=2 - [GAB1\_HUMAN]  
Q5XP14 E3 ubiquitin-protein ligase RNF123 OS=Homo sapiens GN=RNF123 PE=1 SV=1 - [RN123\_HUMAN]  
Q6NW29 RWD domain-containing protein 4 OS=Homo sapiens GN=RWDD4 PE=1 SV=3 - [RWDD4\_HUMAN]  
Q9ULU4 Protein kinase C-binding protein 1 OS=Homo sapiens GN=ZMYND8 PE=1 SV=2 - [PKCB1\_HUMAN]  
Q12873 Chromodomain-helicase-DNA-binding protein 3 OS=Homo sapiens GN=CHD3 PE=1 SV=3 - [CHD3\_HUMAN]  
Q5TCZ1 SH3 and PX domain-containing protein 2A OS=Homo sapiens GN=SH3PX2A PE=1 SV=1 - [SPD2A\_HUMAN]  
P98155 Integral membrane protein DGCR2/IDD OS=Homo sapiens GN=DGCR2 PE=2 SV=1 - [IDD\_HUMAN]  
Q15553 Microtubule-associated protein RP/EB family member 2 OS=Homo sapiens GN=MAPRE2 PE=1 SV=1 - [MARE2\_HUMAN]  
Q9H5H4 Zinc finger protein 768 OS=Homo sapiens GN=ZNF768 PE=1 SV=2 - [ZN768\_HUMAN]  
Q92845 Kinesin-associated protein 3 OS=Homo sapiens GN=KIFAP3 PE=1 SV=2 - [KIFAP3\_HUMAN]  
O43759 Synaptogyrin-1 OS=Homo sapiens GN=SYNGR1 PE=1 SV=2 - [SNG1\_HUMAN]  
O60885 Bromodomain-containing protein 4 OS=Homo sapiens GN=BRD4 PE=1 SV=2 - [BRD4\_HUMAN]  
Q13057 Bifunctional coenzyme A synthase OS=Homo sapiens GN=COASY PE=1 SV=4 - [COASY\_HUMAN]  
Q14031 Collagen alpha-6(IV) chain OS=Homo sapiens GN=COL4A6 PE=1 SV=3 - [C04A6\_HUMAN]  
Q15262 Receptor-type tyrosine-protein phosphatase kappa OS=Homo sapiens GN=PTPRK PE=1 SV=2 - [PTPRK\_HUMAN]  
Q96RQ3 Methylcrotonoyl-CoA carboxylase subunit alpha, mitochondrial OS=Homo sapiens GN=MCCC1 PE=1 SV=3 - [MCCA\_HUMAN]  
Q9NVR0 Kelch-like protein 11 OS=Homo sapiens GN=KLHL11 PE=1 SV=1 - [KLHL11\_HUMAN]  
Q9UGV2 Protein NDRG3 OS=Homo sapiens GN=NDRG3 PE=1 SV=2 - [NDRG3\_HUMAN]  
Q8NF37 Lysophosphatidylcholine acyltransferase 1 OS=Homo sapiens GN=LPCAT1 PE=1 SV=2 - [PCAT1\_HUMAN]  
Q13867 Bleomycin hydrolase OS=Homo sapiens GN=BLMH PE=1 SV=1 - [BLMH\_HUMAN]  
P47914 60S ribosomal protein L29 OS=Homo sapiens GN=RPL29 PE=1 SV=2 - [RL29\_HUMAN]  
P01023 Alpha-2-macroglobulin OS=Homo sapiens GN=A2M PE=1 SV=3 - [A2MG\_HUMAN]  
Q13315 Serine-protein kinase ATM OS=Homo sapiens GN=ATM PE=1 SV=4 - [ATM\_HUMAN]  
Q8N9N2 Activating signal co-receptor 1 complex subunit 1 OS=Homo sapiens GN=ASCC1 PE=1 SV=1 - [ASCC1\_HUMAN]  
Q961Z0 PRK8 apoptosis W1 regulator protein OS=Homo sapiens GN=PAWR PE=1 SV=1 - [PAWR\_HUMAN]  
Q96T23 Remodeling and spacing factor 1 OS=Homo sapiens GN=RSF1 PE=1 SV=2 - [RSF1\_HUMAN]  
Q7Z6B0 Coiled-coil domain-containing protein 91 OS=Homo sapiens GN=CDC91 PE=1 SV=2 - [CCD91\_HUMAN]  
Q9HD26 Golgi-associated PDZ and coiled-coil motif-containing protein OS=Homo sapiens GN=GOPC PE=1 SV=1 - [GOPC\_HUMAN]  
O75808 Calpain-15 OS=Homo sapiens GN=CAPN15 PE=1 SV=1 - [CAN15\_HUMAN]  
Q96GX9 Methylthioribulose-1-phosphate dehydratase OS=Homo sapiens GN=AP1P PE=1 SV=1 - [MTNB\_HUMAN]  
P42694 Probable helicase with zinc finger domain OS=Homo sapiens GN=HELZ PE=1 SV=2 - [HELZ\_HUMAN]  
Q8EUW7 Calcium-dependent secretion activator 2 OS=Homo sapiens GN=CADPS2 PE=1 SV=2 - [CAPS2\_HUMAN]  
Q15041 ADP-ribosylation factor-like protein 6-interacting protein 1 OS=Homo sapiens GN=ARL6IP1 PE=1 SV=2 - [AR6P1\_HUMAN]  
O75489 NADH dehydrogenase [ubiquinone] iron-sulfur protein 3, mitochondrial OS=Homo sapiens GN=NDUFS3 PE=1 SV=1 - [NDUFS3\_HUMAN]  
Q6ZS17 Protein FAM65A OS=Homo sapiens GN=FAM65A PE=1 SV=1 - [FAM65A\_HUMAN]  
Q6Y7W6 PERQ amino acid-rich with GYF domain-containing protein 2 OS=Homo sapiens GN=GIGYF2 PE=1 SV=1 - [PERQ2\_HUMAN]  
Q13277 Syntaxin-3 OS=Homo sapiens GN=STX3 PE=1 SV=3 - [STX3\_HUMAN]  
Q81ZQ1 WD repeat and FYVE domain-containing protein 3 OS=Homo sapiens GN=WDFY3 PE=1 SV=2 - [WDFY3\_HUMAN]  
Q15643 Thyroid receptor-interacting protein 11 OS=Homo sapiens GN=TRIP11 PE=1 SV=3 - [TRIP11\_HUMAN]  
Q01433 AMP deaminase 2 OS=Homo sapiens GN=AMPD2 PE=1 SV=2 - [AMPD2\_HUMAN]  
Q5TAX3 Terminal uridylyltransferase 4 OS=Homo sapiens GN=ZCCHC11 PE=1 SV=3 - [TUT4\_HUMAN]  
Q8NHU6 Tudor domain-containing protein 7 OS=Homo sapiens GN=TDRD7 PE=1 SV=2 - [TDRD7\_HUMAN]  
P30613 Pyruvate kinase PKLR OS=Homo sapiens GN=PKLR PE=1 SV=2 - [KPYR\_HUMAN]  
Q9Y4E6 WD repeat-containing protein 7 OS=Homo sapiens GN=WDR7 PE=1 SV=2 - [WDR7\_HUMAN]  
P35442 Thrombospondin-2 OS=Homo sapiens GN=THBS2 PE=1 SV=2 - [TSP2\_HUMAN]  
O94763 Unconventional prefolin RPB5 interactor 1 OS=Homo sapiens GN=UR11 PE=1 SV=3 - [RMP\_HUMAN]  
Q7Z222 Elongation factor Tu GTP-binding domain-containing protein 1 OS=Homo sapiens GN=EFTUD1 PE=1 SV=2 - [ETUD1\_HUMAN]  
Q96AY3 Peptidyl-prolyl cis-trans isomerase FKBP10 OS=Homo sapiens GN=FKBP10 PE=1 SV=1 - [FKBP10\_HUMAN]  
Q96HP0 Dedicator of cytokinesis protein 6 OS=Homo sapiens GN=DOCK6 PE=1 SV=3 - [DOCK6\_HUMAN]  
Q9UMR5 Lysosomal thioesterase PPT2 OS=Homo sapiens GN=PPT2 PE=1 SV=4 - [PPT2\_HUMAN]  
Q8N766 ER membrane protein complex subunit 1 OS=Homo sapiens GN=EMC1 PE=1 SV=1 - [EMC1\_HUMAN]  
Q9NV4 Cyclin-dependent kinase 12 OS=Homo sapiens GN=CDK12 PE=1 SV=2 - [CDK12\_HUMAN]  
Q32P44 Echinoderm microtubule-associated protein-like 3 OS=Homo sapiens GN=EML3 PE=1 SV=1 - [EMAL3\_HUMAN]  
Q9Y5A7 NEBD8 ultimate buster 1 OS=Homo sapiens GN=NUB1 PE=1 SV=2 - [NUB1\_HUMAN]

Q01650 Large neutral amino acids transporter small subunit 1 OS=Homo sapiens GN=SLC7A5 PE=1 SV=2 - [LAT1\_HUMAN]  
Q9NZM3 Intersectin-2 OS=Homo sapiens GN=ITSN2 PE=1 SV=3 - [ITSN2\_HUMAN]  
P23458 Tyrosine-protein kinase JAK1 OS=Homo sapiens GN=JAK1 PE=1 SV=2 - [JAK1\_HUMAN]  
Q8WXG6 MAP kinase-activating death domain protein OS=Homo sapiens GN=MADD PE=1 SV=2 - [MADD\_HUMAN]  
Q9BYK8 Helicase with zinc finger domain 2 OS=Homo sapiens GN=HELZ2 PE=1 SV=6 - [HELZ2\_HUMAN]  
O15013 Rho guanine nucleotide exchange factor 10 OS=Homo sapiens GN=ARHGEF10 PE=1 SV=4 - [ARHG10\_HUMAN]  
O75334 Liprin-alpha-2 OS=Homo sapiens GN=PPP1A2 PE=1 SV=2 - [LIP1A2\_HUMAN]  
A1L4H1 Soluble scavenger receptor cysteine-rich domain-containing protein SSC5D OS=Homo sapiens GN=SSC5D PE=1 SV=3 - [SRCRL\_HUMAN]  
P35269 General transcription factor IIF subunit 1 OS=Homo sapiens GN=GTF2F1 PE=1 SV=2 - [T2FA\_HUMAN]  
Q6R327 Rapamycin-insensitive companion of mTOR OS=Homo sapiens GN=RICTOR PE=1 SV=1 - [RICTR\_HUMAN]  
Q99996 A-kinase anchor protein 9 OS=Homo sapiens GN=AKAP9 PE=1 SV=3 - [AKAP9\_HUMAN]  
O43847 Nardilysin OS=Homo sapiens GN=NRD1 PE=1 SV=2 - [NRDC\_HUMAN]  
Q9NV96 Cell cycle control protein 50A OS=Homo sapiens GN=TMEM30A PE=1 SV=1 - [CC50A\_HUMAN]  
Q9Y217 1-phosphatidylinositol 3-phosphate 5-kinase OS=Homo sapiens GN=PIKFYVE PE=1 SV=3 - [FYV1\_HUMAN]  
Q81YB7 DIS3-like exonuclease 2 OS=Homo sapiens GN=DIS3L2 PE=1 SV=4 - [D13L2\_HUMAN]  
Q9NXU5 ADP-ribosylation factor-like protein 15 OS=Homo sapiens GN=ARL15 PE=1 SV=1 - [ARL15\_HUMAN]  
Q12955 Ankyrin-3 OS=Homo sapiens GN=ANK3 PE=1 SV=3 - [ANK3\_HUMAN]  
Q96JN8 Neurized-like protein 4 OS=Homo sapiens GN=NEURL4 PE=1 SV=2 - [NEUL4\_HUMAN]  
Q6BDS2 UHRF1-binding protein 1 OS=Homo sapiens GN=UHRF1BP1 PE=1 SV=1 - [URFB1\_HUMAN]  
Q13724 Mannosyl-oligosaccharide glucosidase OS=Homo sapiens GN=MOGS PE=1 SV=5 - [MOGS\_HUMAN]  
Q81V48 3'-5' exoribonuclease 1 OS=Homo sapiens GN=ERI1 PE=1 SV=3 - [ERI1\_HUMAN]  
O94887 FERM, RhoGEF and pleckstrin domain-containing protein 2 OS=Homo sapiens GN=FARP2 PE=1 SV=3 - [FARP2\_HUMAN]  
Q15223 Nectin-1 OS=Homo sapiens GN=PVRL1 PE=1 SV=3 - [PVRL1\_HUMAN]  
Q9HB11 Beta-parvin OS=Homo sapiens GN=PARVB PE=1 SV=1 - [PARVB\_HUMAN]  
Q9ULH0 Kinase D-interacting substrate of 220 kDa OS=Homo sapiens GN=KIDINS220 PE=1 SV=3 - [KDIS\_HUMAN]  
Q96RS0 Trimethylguanosine synthase OS=Homo sapiens GN=TGS1 PE=1 SV=3 - [TGS1\_HUMAN]  
Q81ZU2 WD repeat-containing protein 17 OS=Homo sapiens GN=WDR17 PE=2 SV=2 - [WDR17\_HUMAN]  
Q9Y6Q2 Stonin-1 OS=Homo sapiens GN=STON1 PE=1 SV=2 - [STON1\_HUMAN]  
Q8NB49 Phospholipid-transporting ATPase IG OS=Homo sapiens GN=ATP11C PE=1 SV=3 - [AT11C\_HUMAN]  
Q9HC4 Roundabout homolog 2 OS=Homo sapiens GN=ROBO2 PE=1 SV=2 - [ROBO2\_HUMAN]  
Q659C4 La-related protein 1B OS=Homo sapiens GN=LARP1B PE=1 SV=2 - [LAR1B\_HUMAN]  
Q9H2G2 STE20-like serine/threonine-protein kinase OS=Homo sapiens GN=SLK PE=1 SV=1 - [SLK\_HUMAN]  
Q9NSE4 Isoleucine-tRNA ligase, mitochondrial OS=Homo sapiens GN=IARS2 PE=1 SV=2 - [SYM\_HUMAN]  
A0FG88 Extended synaptotagmin-2 OS=Homo sapiens GN=ESYT2 PE=1 SV=1 - [ESYT2\_HUMAN]  
O95714 E3 ubiquitin-protein ligase HERC2 OS=Homo sapiens GN=HERC2 PE=1 SV=2 - [HERC2\_HUMAN]  
Q8ND24 RING finger protein 214 OS=Homo sapiens GN=RNFP214 PE=1 SV=2 - [RN214\_HUMAN]  
O95382 Mitogen-activated protein kinase kinase 6 OS=Homo sapiens GN=MAP3K6 PE=1 SV=3 - [M3K6\_HUMAN]  
P08123 Collagen alpha-2(I) chain OS=Homo sapiens GN=COL1A2 PE=1 SV=7 - [CO1A2\_HUMAN]  
P31327 Carbamoyl-phosphate synthase [ammonial], mitochondrial OS=Homo sapiens GN=CPS1 PE=1 SV=2 - [CPSM\_HUMAN]  
Q9UPW5 Cytosolic carboxypeptidase 1 OS=Homo sapiens GN=AGTPBP1 PE=1 SV=3 - [CBPC1\_HUMAN]  
Q6P2P2 Putative protein arginine N-methyltransferase 9 OS=Homo sapiens GN=PRMT9 PE=2 SV=1 - [ANM9\_HUMAN]  
Q9UPRO Inactive phospholipase C-like protein 2 OS=Homo sapiens GN=PLCL2 PE=1 SV=2 - [PLCL2\_HUMAN]  
Q9NZN5 Rho guanine nucleotide exchange factor 12 OS=Homo sapiens GN=ARHGEF12 PE=1 SV=1 - [ARHG12\_HUMAN]  
O43251 RNA binding protein fox-1 homolog 2 OS=Homo sapiens GN=RBF0X2 PE=1 SV=3 - [RFOX2\_HUMAN]  
Q13459 Unconventional myosin-1xb OS=Homo sapiens GN=MYO9B PE=1 SV=3 - [MYO9B\_HUMAN]  
P36406 E3 ubiquitin-protein ligase TRIM23 OS=Homo sapiens GN=TRIM23 PE=1 SV=1 - [TR123\_HUMAN]  
Q666R4 DDB1- and CUL4-associated factor 15 OS=Homo sapiens GN=DCAF15 PE=1 SV=1 - [DCAF15\_HUMAN]  
Q96BR1 Serine/threonine-protein kinase Sgk3 OS=Homo sapiens GN=SGK3 PE=1 SV=1 - [SGK3\_HUMAN]  
Q16352 Alpha-interxexin OS=Homo sapiens GN=INA PE=1 SV=2 - [AINX\_HUMAN]  
O43683 Mitotic checkpoint serine/threonine-protein kinase BUB1 OS=Homo sapiens GN=BUB1 PE=1 SV=1 - [BUB1\_HUMAN]  
Q9NVM4 Protein arginine N-methyltransferase 7 OS=Homo sapiens GN=PRMT7 PE=1 SV=1 - [ANM7\_HUMAN]  
Q96S97 Myeloid-associated differentiation marker OS=Homo sapiens GN=MYADM PE=1 SV=2 - [MYADM\_HUMAN]  
Q77456 Kinesin-like protein KIF21A OS=Homo sapiens GN=KIF21A PE=1 SV=2 - [K121A\_HUMAN]  
Q9H1E3 Nuclear ubiquitously casein and cyclin-dependent kinase substrate 1 OS=Homo sapiens GN=NUCKS1 PE=1 SV=1 - [NUCKS\_HUMAN]  
Q9HA65 TBC1 domain family member 17 OS=Homo sapiens GN=TBC1D17 PE=1 SV=2 - [TBC17\_HUMAN]  
Q14161 ARF GTPase-activating protein GIT2 OS=Homo sapiens GN=GIT2 PE=1 SV=2 - [GIT2\_HUMAN]  
Q9H892 Tetrapeptide repeat protein 12 OS=Homo sapiens GN=TTIC12 PE=1 SV=2 - [TTIC12\_HUMAN]  
Q9P2K5 Myelin expression factor 2 OS=Homo sapiens GN=MYEF2 PE=1 SV=3 - [MYEF2\_HUMAN]  
Q6P9A2 Polypeptide N-acetylgalactosaminyltransferase 18 OS=Homo sapiens GN=GALNT18 PE=2 SV=2 - [GLT18\_HUMAN]  
Q86UX2 Inter-alpha-trypsin inhibitor heavy chain H5 OS=Homo sapiens GN=ITIH5 PE=2 SV=2 - [ITIH5\_HUMAN]  
Q9UPM8 AP-4 complex subunit epsilon-1 OS=Homo sapiens GN=AP4E1 PE=1 SV=2 - [AP4E1\_HUMAN]  
Q9H0K6 Pseudouridylylase synthase 7 homolog-like protein OS=Homo sapiens GN=PUS7L PE=1 SV=1 - [PUS7L\_HUMAN]  
Q8TJD6 DmX-like protein 2 OS=Homo sapiens GN=DMXL2 PE=1 SV=2 - [DMXL2\_HUMAN]  
P00488 Coagulation factor XIII A chain OS=Homo sapiens GN=F13A1 PE=1 SV=4 - [F13A\_HUMAN]  
Q9NQH7 Probable Xaa-Pro aminopeptidase 3 OS=Homo sapiens GN=XPNPEP3 PE=1 SV=1 - [XPP3\_HUMAN]  
Q9NXV6 CDKN2A-interacting protein OS=Homo sapiens GN=CDKN2AIP PE=1 SV=3 - [CARF\_HUMAN]  
Q9UHV7 Mediator of RNA polymerase II transcription subunit 13 OS=Homo sapiens GN=MED13 PE=1 SV=3 - [MED13\_HUMAN]  
Q8TE11 Nuclear pore membrane glycoprotein 210 OS=Homo sapiens GN=NUP210 PE=1 SV=3 - [PO210\_HUMAN]  
P12111 Collagen alpha-3(VI) chain OS=Homo sapiens GN=COL6A3 PE=1 SV=5 - [CO6A3\_HUMAN]  
Q8NB3 Transmembrane protein 87A OS=Homo sapiens GN=TMEM87A PE=1 SV=3 - [TM87A\_HUMAN]  
Q15811 Intersectin-1 OS=Homo sapiens GN=ITSN1 PE=1 SV=3 - [ITSN1\_HUMAN]  
O14647 Chromodomain-helicase-DNA-binding protein 2 OS=Homo sapiens GN=CHD2 PE=1 SV=2 - [CHD2\_HUMAN]  
Q13371 Phosducin-like protein OS=Homo sapiens GN=PDCL PE=1 SV=3 - [PHLP\_HUMAN]  
P04114 Apolipoprotein B-100 OS=Homo sapiens GN=APOB PE=1 SV=2 - [APOB\_HUMAN]  
Q96R84 Bardet-Biedl syndrome 4 protein OS=Homo sapiens GN=BBS4 PE=1 SV=2 - [BBS4\_HUMAN]  
Q96JG8 Melanoma-associated antigen D4 OS=Homo sapiens GN=MAGED4 PE=1 SV=3 - [MAGD4\_HUMAN]  
O15066 Kinesin-like protein KIF3B OS=Homo sapiens GN=KIF3B PE=1 SV=1 - [KIF3B\_HUMAN]  
Q92954 Proteoglycan 4 OS=Homo sapiens GN=PRG4 PE=1 SV=2 - [PRG4\_HUMAN]  
P46937 Transcriptional coactivator YAP1 OS=Homo sapiens GN=YAP1 PE=1 SV=2 - [YAP1\_HUMAN]  
Q8NG31 Protein CASC5 OS=Homo sapiens GN=CASC5 PE=1 SV=3 - [CASC5\_HUMAN]  
Q9H3C7 Gametogenin-binding protein 2 OS=Homo sapiens GN=GGNB2 PE=1 SV=1 - [GGNB2\_HUMAN]  
Q86WG5 Myotubularin-related protein 13 OS=Homo sapiens GN=SBF2 PE=1 SV=1 - [MTMRD\_HUMAN]  
P20742 Pregnancy zone protein OS=Homo sapiens GN=PZP PE=1 SV=4 - [PZP\_HUMAN]  
Q8WX93 Palladin OS=Homo sapiens GN=PALLD PE=1 SV=3 - [PALLD\_HUMAN]  
Q9NV17 ATPase family AAA domain-containing protein 3A OS=Homo sapiens GN=ATAD3A PE=1 SV=2 - [ATD3A\_HUMAN]  
Q9UPY5 Cystine/glutamate transporter OS=Homo sapiens GN=SLC7A11 PE=1 SV=1 - [XCT\_HUMAN]  
Q9UBW7 Zinc finger MYM-type protein 2 OS=Homo sapiens GN=ZMYM2 PE=1 SV=1 - [ZMYM2\_HUMAN]  
Q07157 Tight junction protein ZO-1 OS=Homo sapiens GN=TJP1 PE=1 SV=3 - [ZO1\_HUMAN]  
Q7RTPE Protein-methionine sulfoxide oxidase MICAL3 OS=Homo sapiens GN=MICAL3 PE=1 SV=2 - [MICA3\_HUMAN]  
Q7Z3E5 LisH domain-containing protein ARMC9 OS=Homo sapiens GN=ARMC9 PE=1 SV=2 - [ARMC9\_HUMAN]  
P08069 Insulin-like growth factor 1 receptor OS=Homo sapiens GN=IGF1R PE=1 SV=1 - [IGF1R\_HUMAN]  
Q96PU8 Protein quaking OS=Homo sapiens GN=QKI PE=1 SV=1 - [QKI\_HUMAN]  
Q9RXW6 Oxysterol-binding protein-related protein 1 OS=Homo sapiens GN=OSBP1A PE=1 SV=2 - [OSBL1\_HUMAN]  
O75592 E3 ubiquitin-protein ligase MYCBP2 OS=Homo sapiens GN=MYCBP2 PE=1 SV=3 - [MYCB2\_HUMAN]  
O75084 Frizzled-7 OS=Homo sapiens GN=FZD7 PE=1 SV=2 - [FZD7\_HUMAN]  
Q8WUF5 RelA-associated inhibitor OS=Homo sapiens GN=PPP1R13L PE=1 SV=4 - [IASPP\_HUMAN]  
P46100 Transcriptional regulator ATRX OS=Homo sapiens GN=ATRX PE=1 SV=5 - [ATRX\_HUMAN]  
Q5TKA1 Protein lin-9 homolog OS=Homo sapiens GN=LIN9 PE=1 SV=1 - [LIN9\_HUMAN]  
Q8WXA9 Splicing regulatory glutamine/lysine-rich protein 1 OS=Homo sapiens GN=SREK1 PE=1 SV=1 - [SREK1\_HUMAN]  
Q96GX5 Serine/threonine-protein kinase greatwall OS=Homo sapiens GN=MASTL PE=1 SV=1 - [GWL\_HUMAN]  
O43896 Kinesin-like protein KIF1C OS=Homo sapiens GN=KIF1C PE=1 SV=3 - [KIF1C\_HUMAN]  
Q8TCR8 Signal peptide peptidase-like 2A OS=Homo sapiens GN=SPPL2A PE=1 SV=2 - [SPP2A\_HUMAN]  
Q9C0J8 pre-mRNA 3' end processing protein WDR33 OS=Homo sapiens GN=WDR33 PE=1 SV=2 - [WDR33\_HUMAN]  
Q76LX8 A disintegrin and metalloproteinase with thrombospondin motifs 13 OS=Homo sapiens GN=ADAMTS13 PE=1 SV=1 - [ATS13\_HUMAN]  
Q01484 Ankyrin-2 OS=Homo sapiens GN=ANK2 PE=1 SV=4 - [ANK2\_HUMAN]  
Q13099 Intraflagellar transport protein 88 homolog OS=Homo sapiens GN=IFT88 PE=2 SV=2 - [IFT88\_HUMAN]  
Q6ZJ1 Neurobeachin-like protein 2 OS=Homo sapiens GN=NBEL2 PE=1 SV=2 - [NBEL2\_HUMAN]  
P05107 Integrin beta-2 OS=Homo sapiens GN=ITGB2 PE=1 SV=2 - [ITB2\_HUMAN]  
Q9P2D1 Chromodomain-helicase-DNA-binding protein 7 OS=Homo sapiens GN=CHD7 PE=1 SV=3 - [CHD7\_HUMAN]  
P14780 Matrix metalloproteinase-9 OS=Homo sapiens GN=MMP9 PE=1 SV=3 - [MMP9\_HUMAN]  
Q13433 Zinc transporter ZIP6 OS=Homo sapiens GN=SLC39A6 PE=1 SV=3 - [S39A6\_HUMAN]  
Q9H2X0 Chordin OS=Homo sapiens GN=CHRD PE=1 SV=2 - [CHRD\_HUMAN]  
O14686 Histone-lysine N-methyltransferase 2D OS=Homo sapiens GN=KMT2D PE=1 SV=2 - [KMT2D\_HUMAN]  
Q9UPN6 Protein SCAP8 OS=Homo sapiens GN=SCAF8 PE=1 SV=1 - [SCAF8\_HUMAN]  
P29400 Collagen alpha-5(IV) chain OS=Homo sapiens GN=COL4A5 PE=1 SV=2 - [CO4A5\_HUMAN]

A1A4S6 Rho GTPase-activating protein 10 OS=Homo sapiens GN=ARHGAP10 PE=1 SV=1 - [RHG10\_HUMAN]  
Q9P2K2 Thioredoxin domain-containing protein 16 OS=Homo sapiens GN=TXNDC16 PE=2 SV=4 - [TXD16\_HUMAN]  
Q96PV6 Leukocyte receptor cluster member 8 OS=Homo sapiens GN=LENG8 PE=1 SV=2 - [LENG8\_HUMAN]  
Q5TH69 Brefeldin A-inhibited guanine nucleotide-exchange protein 3 OS=Homo sapiens GN=ARFGEF3 PE=1 SV=3 - [BIG3\_HUMAN]  
Q9H0E9 Bromodomain-containing protein 8 OS=Homo sapiens GN=BRD8 PE=1 SV=2 - [BRD8\_HUMAN]  
Q9NZP5 Olfactory receptor 5AC2 OS=Homo sapiens GN=OR5AC2 PE=3 SV=2 - [O5AC2\_HUMAN]  
Q9H410 Kinetochore-associated protein DSN1 homolog OS=Homo sapiens GN=DSN1 PE=1 SV=2 - [DSN1\_HUMAN]  
P22455 Fibroblast growth factor receptor 4 OS=Homo sapiens GN=FGFR4 PE=1 SV=2 - [FGFR4\_HUMAN]  
Q8NF91 Nesprin-1 OS=Homo sapiens GN=SYNE1 PE=1 SV=4 - [SYNE1\_HUMAN]  
P22105 Tenascin-X OS=Homo sapiens GN=TNXB PE=1 SV=3 - [TNXB\_HUMAN]  
Q8WXE9 Stonin-2 OS=Homo sapiens GN=STON2 PE=1 SV=1 - [STON2\_HUMAN]  
P09603 Macrophage colony-stimulating factor 1 OS=Homo sapiens GN=CSF1 PE=1 SV=2 - [CSF1\_HUMAN]  
Q01955 Collagen alpha-3(IV) chain OS=Homo sapiens GN=COL4A3 PE=1 SV=3 - [C04A3\_HUMAN]  
Q03001 Dystonin OS=Homo sapiens GN=DST PE=1 SV=4 - [DYST\_HUMAN]  
Q15154 Pericentriolar material 1 protein OS=Homo sapiens GN=PCM1 PE=1 SV=4 - [PCM1\_HUMAN]  
Q2T9J0 Peroxisomal leader peptide-processing protease OS=Homo sapiens GN=TYSD1 PE=1 SV=3 - [TYSD1\_HUMAN]  
A0JNW5 UHRF1-binding protein 1-like OS=Homo sapiens GN=UHRF1BP1L PE=1 SV=2 - [UH1BL\_HUMAN]  
Q03692 Collagen alpha-1(X) chain OS=Homo sapiens GN=COL10A1 PE=1 SV=2 - [COA1\_HUMAN]  
Q96RN5 Mediator of RNA polymerase II transcription subunit 15 OS=Homo sapiens GN=MED15 PE=1 SV=2 - [MED15\_HUMAN]  
Q2M218 AP2-associated protein kinase 1 OS=Homo sapiens GN=AAK1 PE=1 SV=3 - [AAK1\_HUMAN]  
Q5VZL5 Zinc finger MYM-type protein 4 OS=Homo sapiens GN=ZMYM4 PE=1 SV=1 - [ZMYM4\_HUMAN]  
Q95197 Reticulon-3 OS=Homo sapiens GN=RTN3 PE=1 SV=2 - [RTN3\_HUMAN]  
Q75691 Small subunit processome component 20 homolog OS=Homo sapiens GN=UTP20 PE=1 SV=3 - [UTP20\_HUMAN]  
P11169 Solute carrier family 2, facilitated glucose transporter member 3 OS=Homo sapiens GN=SLC2A3 PE=2 SV=1 - [GTR3\_HUMAN]  
Q9ULG1 DNA helicase INO80 OS=Homo sapiens GN=INO80 PE=1 SV=2 - [INO80\_HUMAN]  
P13671 Complement component C6 OS=Homo sapiens GN=C6 PE=1 SV=3 - [C06\_HUMAN]  
Q96JB3 Hypermethylated in cancer 2 protein OS=Homo sapiens GN=HIC2 PE=1 SV=2 - [HIC2\_HUMAN]  
Q49M13 Ceramide kinase-like protein OS=Homo sapiens GN=CERKL PE=1 SV=1 - [CERKL\_HUMAN]  
Q9P2N6 KAT8 regulatory NSL complex subunit 3 OS=Homo sapiens GN=KANSL3 PE=1 SV=2 - [KANL3\_HUMAN]  
Q9BV73 Centrosome-associated protein CEP250 OS=Homo sapiens GN=CEP250 PE=1 SV=2 - [CP250\_HUMAN]  
Q9UPQ9 Trinucleotide repeat-containing gene 6B protein OS=Homo sapiens GN=TNRC6B PE=1 SV=4 - [TNRGB\_HUMAN]  
Q9H2D6 TRIO and F-actin-binding protein OS=Homo sapiens GN=TRIOBP PE=1 SV=3 - [TARA\_HUMAN]  
Q9NZT2 Opioid growth factor receptor OS=Homo sapiens GN=OGFR PE=1 SV=3 - [OGFR\_HUMAN]  
Q9NYU1 UDP-glucose:glycoprotein glucosyltransferase 2 OS=Homo sapiens GN=UGGT2 PE=1 SV=4 - [UGGG2\_HUMAN]  
Q9NQ78 Kinesin-like protein KIF13B OS=Homo sapiens GN=KIF13B PE=1 SV=2 - [K113B\_HUMAN]  
Q9V618 Nuclear receptor corepressor 2 OS=Homo sapiens GN=NCOR2 PE=1 SV=2 - [NCOR2\_HUMAN]  
Q9NZM1 Myoferlin OS=Homo sapiens GN=MYOF PE=1 SV=1 - [MYOF\_HUMAN]  
P35251 Replication factor C subunit 1 OS=Homo sapiens GN=RFC1 PE=1 SV=4 - [RFC1\_HUMAN]  
P11532 Dystrophin OS=Homo sapiens GN=DMD PE=1 SV=3 - [DMD\_HUMAN]  
Q5TZA2 Rootletin OS=Homo sapiens GN=CROCC PE=1 SV=1 - [CROCC\_HUMAN]  
Q9H4D0 Calsyntenin-2 OS=Homo sapiens GN=CLSTN2 PE=1 SV=2 - [CSTN2\_HUMAN]  
P00451 Coagulation factor VIII OS=Homo sapiens GN=F8 PE=1 SV=1 - [F8\_HUMAN]  
Q96F46 Interleukin-17 receptor A OS=Homo sapiens GN=IL17RA PE=1 SV=2 - [I17RA\_HUMAN]
