# Supplementary material for: Identification and Characterization of 293T Cell-Derived Exosomes by Profiling the Protein, mRNA and MicroRNA Components
Source: PubMed Central journal article supplement (PMC5029934; doi:10.1371/journal.pone.0163043), 2016-09-20
Supplement: pone.0163043.s003.pdf [file pone.0163043.s003.pdf]

| ENTREZ_GENE_ID | Name                                                                                                                            | Species      |
|----------------|---------------------------------------------------------------------------------------------------------------------------------|--------------|
| 91             | activin A receptor, type IB                                                                                                     | Homo sapiens |
| 1509           | cathepsin D                                                                                                                     | Homo sapiens |
| 23204          | ADP-ribosylation factor-like 6 interacting protein 1                                                                            | Homo sapiens |
| 26986          | poly(A) binding protein, cytoplasmic pseudogene 5; poly(A) binding protein, cytoplasmic 1                                       | Homo sapiens |
| 23277          | KIAA0664                                                                                                                        | Homo sapiens |
| 89853          | family with sequence similarity 125, member B                                                                                   | Homo sapiens |
| 79892          | chromosome 10 open reading frame 119                                                                                            | Homo sapiens |
| 79809          | tetratricopeptide repeat domain 21B                                                                                             | Homo sapiens |
| 2321           | fms-related tyrosine kinase 1 (vascular endothelial growth factor/vascular permeability factor receptor)                        | Homo sapiens |
| 5118           | procollagen C-endopeptidase enhancer                                                                                            | Homo sapiens |
| 5985           | replication factor C (activator 1) 5, 36.5kDa                                                                                   | Homo sapiens |
| 57510          | exportin 5                                                                                                                      | Homo sapiens |
| 4121           | mannosidase, alpha, class 1A, member 1                                                                                          | Homo sapiens |
| 2027           | enolase 3 (beta, muscle)                                                                                                        | Homo sapiens |
| 29094          | galectin-related protein                                                                                                        | Homo sapiens |
| 23608          | makorin ring finger protein pseudogene 6; makorin ring finger protein 1                                                         | Homo sapiens |
| 2153           | coagulation factor V (proaccelerin, labile factor)                                                                              | Homo sapiens |
| 53944          | casein kinase 1, gamma 1                                                                                                        | Homo sapiens |
| 22826          | DnaJ (Hsp40) homolog, subfamily C, member 8                                                                                     | Homo sapiens |
| 7153           | topoisomerase (DNA) II alpha 170kDa                                                                                             | Homo sapiens |
| 128866         | chromatin modifying protein 4B                                                                                                  | Homo sapiens |
| 3066           | histone deacetylase 2                                                                                                           | Homo sapiens |
| 9747           | family with sequence similarity 115, member A; family with sequence similarity 115, member B (pseudogene)                       | Homo sapiens |
| 5515           | protein phosphatase 2 (formerly 2A), catalytic subunit, alpha isoform                                                           | Homo sapiens |
| 128            | alcohol dehydrogenase 5 (class III), chi polypeptide, pseudogene 4; alcohol dehydrogenase 5 (class III), chi polypeptide        | Homo sapiens |
| 2734           | golgi apparatus protein 1                                                                                                       | Homo sapiens |
| 10533          | ATG7 autophagy related 7 homolog (S. cerevisiae)                                                                                | Homo sapiens |
| 23646          | phospholipase D family, member 3                                                                                                | Homo sapiens |
| 6201           | ribosomal protein S7; ribosomal protein S7 pseudogene 11; ribosomal protein S7 pseudogene 4; ribosomal protein S7 pseudogene 10 | Homo sapiens |
| 8655           | dynein, light chain, LC8-type 1                                                                                                 | Homo sapiens |
| 83986          | integrin alpha FG-GAP repeat containing 3                                                                                       | Homo sapiens |
| 7205           | thyroid hormone receptor interactor 6                                                                                           | Homo sapiens |
| 818            | calcium/calmodulin-dependent protein kinase II gamma                                                                            | Homo sapiens |
| 5685           | proteasome (prosome, macropain) subunit, alpha type, 4                                                                          | Homo sapiens |
| 81567          | thioredoxin domain containing 5 (endoplasmic reticulum); muted homolog (mouse)                                                  | Homo sapiens |
| 63915          | thioredoxin domain containing 5 (endoplasmic reticulum); muted homolog (mouse)                                                  | Homo sapiens |
| 4176           | minichromosome maintenance complex component 7                                                                                  | Homo sapiens |
| 55968          | NSFL1 (p97) cofactor (p47)                                                                                                      | Homo sapiens |
| 9328           | general transcription factor IIIC, polypeptide 5, 63kDa                                                                         | Homo sapiens |
| 8614           | stanniocalcin 2                                                                                                                 | Homo sapiens |
| 388            | ras homolog gene family, member B                                                                                               | Homo sapiens |
| 64175          | leucine proline-enriched proteoglycan (leprecan) 1                                                                              | Homo sapiens |
| 9254           | calcium channel, voltage-dependent, alpha 2/delta subunit 2                                                                     | Homo sapiens |
| 55571          | chromosome 2 open reading frame 29                                                                                              | Homo sapiens |
| 3035           | histidyl-tRNA synthetase                                                                                                        | Homo sapiens |
| 79720          | vacuolar protein sorting 37 homolog B (S. cerevisiae)                                                                           | Homo sapiens |
| 51194          | importin 11                                                                                                                     | Homo sapiens |
| 10291          | splicing factor 3a, subunit 1, 120kDa                                                                                           | Homo sapiens |
| 27000          | DnaJ (Hsp40) homolog, subfamily C, member 2                                                                                     | Homo sapiens |
| 55119          | PRP38 pre-mRNA processing factor 38 (yeast) domain containing B                                                                 | Homo sapiens |
| 55327          | lin-7 homolog C (C. elegans)                                                                                                    | Homo sapiens |
| 79077          | dCTP pyrophosphatase 1                                                                                                          | Homo sapiens |
| 5965           | RecQ protein-like (DNA helicase Q1-like)                                                                                        | Homo sapiens |
| 139818         | dedicator of cytokinesis 11                                                                                                     | Homo sapiens |
| 65986          | zinc finger and BTB domain containing 10                                                                                        | Homo sapiens |
| 133418         | embigin homolog (mouse)                                                                                                         | Homo sapiens |
| 5339           | similar to Plectin 1 (PLTN) (PCN) (Hemidesmosomal protein 1) (HD1); plectin 1, intermediate filament binding protein 500kDa     | Homo sapiens |
| 25980          | chromosome 20 open reading frame 4                                                                                              | Homo sapiens |
| 6730           | signal recognition particle 68kDa                                                                                               | Homo sapiens |
| 31             | acetyl-Coenzyme A carboxylase alpha                                                                                             | Homo sapiens |
| 115207         | potassium channel tetramerisation domain containing 12                                                                          | Homo sapiens |
| 23335          | WD repeat domain 7                                                                                                              | Homo sapiens |
| 2200           | fibrillin 1                                                                                                                     | Homo sapiens |
| 9230           | RAB11B, member RAS oncogene family                                                                                              | Homo sapiens |
| 6624           | fascin homolog 1, actin-bundling protein (Strongylocentrotus purpuratus)                                                        | Homo sapiens |
| 966            | CD59 molecule, complement regulatory protein                                                                                    | Homo sapiens |
| 23181          | DIP2 disco-interacting protein 2 homolog A (Drosophila)                                                                         | Homo sapiens |
| 3799           | kinesin family member 5B                                                                                                        | Homo sapiens |
| 51606          | ATPase, H+ transporting, lysosomal 50/57kDa, V1 subunit H                                                                       | Homo sapiens |
| 5495           | protein phosphatase 1B (formerly 2C), magnesium-dependent, beta isoform                                                         | Homo sapiens |
| 10383          | tubulin, beta 2C                                                                                                                | Homo sapiens |
| 55660          | PRP40 pre-mRNA processing factor 40 homolog A (S. cerevisiae)                                                                   | Homo sapiens |
| 646949         | ribosomal protein L23 pseudogene 6; ribosomal protein L23                                                                       | Homo sapiens |
| 9349           | ribosomal protein L23 pseudogene 6; ribosomal protein L23                                                                       | Homo sapiens |
| 9696           | ciliary rootlet coiled-coil, rootletin                                                                                          | Homo sapiens |
| 51602          | NOP58 ribonucleoprotein homolog (yeast)                                                                                         | Homo sapiens |
| 9902           | mannose receptor, C type 2                                                                                                      | Homo sapiens |
| 26999          | cytoplasmic FMR1 interacting protein 2                                                                                          | Homo sapiens |
| 80232          | WD repeat domain 26                                                                                                             | Homo sapiens |
| 10631          | periostin, osteoblast specific factor                                                                                           | Homo sapiens |

|        |                                                                                                                                                                                                                                                     |              |
|--------|-----------------------------------------------------------------------------------------------------------------------------------------------------------------------------------------------------------------------------------------------------|--------------|
| 64151  | non-SMC condensin I complex, subunit G                                                                                                                                                                                                              | Homo sapiens |
| 10527  | importin 7                                                                                                                                                                                                                                          | Homo sapiens |
| 140885 | signal-regulatory protein alpha                                                                                                                                                                                                                     | Homo sapiens |
| 392    | Rho GTPase activating protein 1                                                                                                                                                                                                                     | Homo sapiens |
| 528    | ATPase, H <sup>+</sup> transporting, lysosomal 42kDa, VI subunit C1                                                                                                                                                                                 | Homo sapiens |
| 200081 | taxilin alpha                                                                                                                                                                                                                                       | Homo sapiens |
| 8662   | eukaryotic translation initiation factor 3, subunit B                                                                                                                                                                                               | Homo sapiens |
| 79180  | EF-hand domain family, member D2                                                                                                                                                                                                                    | Homo sapiens |
| 6130   | ribosomal protein L7a pseudogene 70; ribosomal protein L7a; ribosomal protein L7a pseudogene 30; ribosomal protein L7a pseudogene 66; ribosomal protein L7a pseudogene 27; ribosomal protein L7a pseudogene 11; ribosomal protein L7a pseudogene 62 | Homo sapiens |
| 4023   | lipoprotein lipase                                                                                                                                                                                                                                  | Homo sapiens |
| 1315   | coatamer protein complex, subunit beta 1                                                                                                                                                                                                            | Homo sapiens |
| 25939  | SAM domain and HD domain 1                                                                                                                                                                                                                          | Homo sapiens |
| 3913   | laminin, beta 2 (laminin S)                                                                                                                                                                                                                         | Homo sapiens |
| 22837  | COBL-like 1                                                                                                                                                                                                                                         | Homo sapiens |
| 7353   | ubiquitin fusion degradation 1 like (yeast)                                                                                                                                                                                                         | Homo sapiens |
| 2810   | stratifin                                                                                                                                                                                                                                           | Homo sapiens |
| 55506  | H2A histone family, member Y2                                                                                                                                                                                                                       | Homo sapiens |
| 6009   | Ras homolog enriched in brain                                                                                                                                                                                                                       | Homo sapiens |
| 5908   | RAP1B, member of RAS oncogene family                                                                                                                                                                                                                | Homo sapiens |
| 6161   | small nucleolar RNA, H/ACA box 7A; small nucleolar RNA, H/ACA box 7B; ribosomal protein L32                                                                                                                                                         | Homo sapiens |
| 53834  | fibroblast growth factor receptor-like 1                                                                                                                                                                                                            | Homo sapiens |
| 2767   | guanine nucleotide binding protein (G protein), alpha 11 (Gq class)                                                                                                                                                                                 | Homo sapiens |
| 84624  | fibronectin type III domain containing 1                                                                                                                                                                                                            | Homo sapiens |
| 9508   | ADAM metalloproteinase with thrombospondin type 1 motif, 3                                                                                                                                                                                          | Homo sapiens |
| 345651 | actin, beta-like 2                                                                                                                                                                                                                                  | Homo sapiens |
| 10197  | proteasome (prosome, macropain) activator subunit 3 (PA28 gamma; Ki)                                                                                                                                                                                | Homo sapiens |
| 56474  | CTP synthase II                                                                                                                                                                                                                                     | Homo sapiens |
| 201475 | RAB12, member RAS oncogene family                                                                                                                                                                                                                   | Homo sapiens |
| 23198  | proteasome (prosome, macropain) activator subunit 4                                                                                                                                                                                                 | Homo sapiens |
| 5289   | phosphoinositide-3-kinase, class 3                                                                                                                                                                                                                  | Homo sapiens |
| 5605   | mitogen-activated protein kinase kinase 2 pseudogene; mitogen-activated protein kinase kinase 2                                                                                                                                                     | Homo sapiens |
| 2548   | glucosidase, alpha; acid                                                                                                                                                                                                                            | Homo sapiens |
| 79869  | cleavage and polyadenylation specific factor 7, 59kDa                                                                                                                                                                                               | Homo sapiens |
| 5917   | arginyl-tRNA synthetase                                                                                                                                                                                                                             | Homo sapiens |
| 3915   | laminin, gamma 1 (formerly LAMB2)                                                                                                                                                                                                                   | Homo sapiens |
| 55696  | RNA binding motif protein 22                                                                                                                                                                                                                        | Homo sapiens |
| 5935   | RNA binding motif (RNP1, RRM) protein 3                                                                                                                                                                                                             | Homo sapiens |
| 11054  | opioid growth factor receptor                                                                                                                                                                                                                       | Homo sapiens |
| 57132  | chromatin modifying protein 1B                                                                                                                                                                                                                      | Homo sapiens |
| 1152   | creatine kinase, brain                                                                                                                                                                                                                              | Homo sapiens |
| 249    | alkaline phosphatase, liver/bone/kidney                                                                                                                                                                                                             | Homo sapiens |
| 10452  | translocase of outer mitochondrial membrane 40 homolog (yeast)                                                                                                                                                                                      | Homo sapiens |
| 118460 | exosome component 6                                                                                                                                                                                                                                 | Homo sapiens |
| 55201  | microtubule-associated protein 1S                                                                                                                                                                                                                   | Homo sapiens |
| 7529   | tyrosine 3-monooxygenase/tryptophan 5-monooxygenase activation protein, beta polypeptide                                                                                                                                                            | Homo sapiens |
| 7919   | HLA-B associated transcript 1                                                                                                                                                                                                                       | Homo sapiens |
| 9351   | solute carrier family 9 (sodium/hydrogen exchanger), member 3 regulator 2                                                                                                                                                                           | Homo sapiens |
| 11127  | kinesin family member 3A                                                                                                                                                                                                                            | Homo sapiens |
| 57470  | leucine rich repeat containing 47                                                                                                                                                                                                                   | Homo sapiens |
| 57650  | KIAA1524                                                                                                                                                                                                                                            | Homo sapiens |
| 3032   | hydroxyacyl-Coenzyme A dehydrogenase/3-ketoacyl-Coenzyme A thiolase/enoyl-Coenzyme A hydratase (trifunctional protein), beta subunit                                                                                                                | Homo sapiens |
| 10867  | tetraspanin 9                                                                                                                                                                                                                                       | Homo sapiens |
| 2805   | glutamic-oxaloacetic transaminase 1, soluble (aspartate aminotransferase 1)                                                                                                                                                                         | Homo sapiens |
| 51340  | crooked neck pre-mRNA splicing factor-like 1 (Drosophila)                                                                                                                                                                                           | Homo sapiens |
| 10672  | guanine nucleotide binding protein (G protein), alpha 13                                                                                                                                                                                            | Homo sapiens |
| 112574 | sorting nexin 18                                                                                                                                                                                                                                    | Homo sapiens |
| 372    | archain 1                                                                                                                                                                                                                                           | Homo sapiens |
| 6601   | SWI/SNF related, matrix associated, actin dependent regulator of chromatin, subfamily c, member 2                                                                                                                                                   | Homo sapiens |
| 29883  | CCR4-NOT transcription complex, subunit 7                                                                                                                                                                                                           | Homo sapiens |
| 10049  | DnaJ (Hsp40) homolog, subfamily B, member 6                                                                                                                                                                                                         | Homo sapiens |
| 5520   | protein phosphatase 2 (formerly 2A), regulatory subunit B, alpha isoform                                                                                                                                                                            | Homo sapiens |
| 7965   | aminoacyl tRNA synthetase complex-interacting multifunctional protein 2; stromal antigen 3-like 3                                                                                                                                                   | Homo sapiens |
| 57674  | ring finger protein 213                                                                                                                                                                                                                             | Homo sapiens |
| 57181  | solute carrier family 39 (zinc transporter), member 10                                                                                                                                                                                              | Homo sapiens |
| 2969   | general transcription factor II, i; general transcription factor II, i, pseudogene                                                                                                                                                                  | Homo sapiens |
| 103    | adenosine deaminase, RNA-specific                                                                                                                                                                                                                   | Homo sapiens |
| 26229  | beta-1,3-glucuronyltransferase 3 (glucuronosyltransferase I)                                                                                                                                                                                        | Homo sapiens |
| 3183   | heterogeneous nuclear ribonucleoprotein C (C1/C2)                                                                                                                                                                                                   | Homo sapiens |
| 27101  | similar to calyculin binding protein; calyculin binding protein                                                                                                                                                                                     | Homo sapiens |
| 10262  | splicing factor 3b, subunit 4, 49kDa                                                                                                                                                                                                                | Homo sapiens |
| 341640 | FRAS1 related extracellular matrix protein 2                                                                                                                                                                                                        | Homo sapiens |
| 29896  | transformer 2 alpha homolog (Drosophila)                                                                                                                                                                                                            | Homo sapiens |
| 84844  | PHD finger protein 5A                                                                                                                                                                                                                               | Homo sapiens |
| 2597   | glyceraldehyde-3-phosphate dehydrogenase-like 6; hypothetical protein LOC100133042; glyceraldehyde-3-phosphate dehydrogenase                                                                                                                        | Homo sapiens |
| 54881  | testis expressed 10                                                                                                                                                                                                                                 | Homo sapiens |
| 1459   | casein kinase 2, alpha prime polypeptide                                                                                                                                                                                                            | Homo sapiens |
| 54545  | myotubularin related protein 12                                                                                                                                                                                                                     | Homo sapiens |
| 55898  | unc-45 homolog A (C. elegans)                                                                                                                                                                                                                       | Homo sapiens |
| 2580   | cyclin G associated kinase                                                                                                                                                                                                                          | Homo sapiens |
| 1073   | cofilin 2 (muscle)                                                                                                                                                                                                                                  | Homo sapiens |

|        |                                                                                                                   |              |
|--------|-------------------------------------------------------------------------------------------------------------------|--------------|
| 6157   | ribosomal protein L27a                                                                                            | Homo sapiens |
| 3337   | DnaJ (Hsp40) homolog, subfamily B, member 1                                                                       | Homo sapiens |
| 6426   | splicing factor, arginine/serine-rich 1                                                                           | Homo sapiens |
| 51495  | protein tyrosine phosphatase-like A domain containing 1                                                           | Homo sapiens |
| 9371   | kinesin family member 3B                                                                                          | Homo sapiens |
| 57819  | LSM2 homolog, U6 small nuclear RNA associated (S. cerevisiae)                                                     | Homo sapiens |
| 10422  | UBA domain containing 1                                                                                           | Homo sapiens |
| 63935  | PDX1 C-terminal inhibiting factor 1                                                                               | Homo sapiens |
| 201627 | family with sequence similarity 116, member A                                                                     | Homo sapiens |
| 25836  | Nipped-B homolog (Drosophila)                                                                                     | Homo sapiens |
| 7150   | topoisomerase (DNA) I                                                                                             | Homo sapiens |
| 3323   | heat shock protein 90kDa alpha (cytosolic), class A member 4 (pseudogene)                                         | Homo sapiens |
| 2730   | glutamate-cysteine ligase, modifier subunit                                                                       | Homo sapiens |
| 55860  | actin-related protein 10 homolog (S. cerevisiae)                                                                  | Homo sapiens |
| 55234  | smu-1 suppressor of mec-8 and unc-52 homolog (C. elegans)                                                         | Homo sapiens |
| 10606  | phosphoribosylaminoimidazole carboxylase, phosphoribosylaminoimidazole succinocarboxamide synthetase              | Homo sapiens |
| 6209   | ribosomal protein S15 pseudogene 5; ribosomal protein S15                                                         | Homo sapiens |
| 6897   | threonyl-tRNA synthetase                                                                                          | Homo sapiens |
| 445582 | POTE ankyrin domain family, member E                                                                              | Homo sapiens |
| 57491  | aryl-hydrocarbon receptor repressor; programmed cell death 6                                                      | Homo sapiens |
| 10016  | aryl-hydrocarbon receptor repressor; programmed cell death 6                                                      | Homo sapiens |
| 64853  | hypothetical LOC653631; hypothetical LOC646050; hypothetical LOC646890; axin interactor, dorsalization associated | Homo sapiens |
| 348995 | nucleoporin 43kDa                                                                                                 | Homo sapiens |
| 2042   | EPH receptor A3                                                                                                   | Homo sapiens |
| 84284  | chromosome 1 open reading frame 57                                                                                | Homo sapiens |
| 5627   | protein S (alpha)                                                                                                 | Homo sapiens |
| 715    | complement component 1, r subcomponent                                                                            | Homo sapiens |
| 55718  | polymerase (RNA) III (DNA directed) polypeptide E (80kD)                                                          | Homo sapiens |
| 6455   | SH3-domain GRB2-like 1                                                                                            | Homo sapiens |
| 23214  | exportin 6                                                                                                        | Homo sapiens |
| 51191  | hect domain and RLD 5                                                                                             | Homo sapiens |
| 5903   | RAN binding protein 2                                                                                             | Homo sapiens |
| 11120  | butyrophilin, subfamily 2, member A1                                                                              | Homo sapiens |
| 3043   | hemoglobin, beta                                                                                                  | Homo sapiens |
| 23376  | KIAA0776                                                                                                          | Homo sapiens |
| 27043  | proline, glutamate and leucine rich protein 1                                                                     | Homo sapiens |
| 3006   | histone cluster 1, H1c                                                                                            | Homo sapiens |
| 6092   | roundabout, axon guidance receptor, homolog 2 (Drosophila)                                                        | Homo sapiens |
| 102    | ADAM metallopeptidase domain 10                                                                                   | Homo sapiens |
| 57187  | THO complex 2                                                                                                     | Homo sapiens |
| 8664   | eukaryotic translation initiation factor 3, subunit D                                                             | Homo sapiens |
| 9181   | Rho/Rac guanine nucleotide exchange factor (GEF) 2                                                                | Homo sapiens |
| 54431  | DnaJ (Hsp40) homolog, subfamily C, member 10                                                                      | Homo sapiens |
| 5223   | phosphoglycerate mutase 1 (brain)                                                                                 | Homo sapiens |
| 54888  | NOL1/NOP2/Sun domain family, member 2                                                                             | Homo sapiens |
| 8894   | eukaryotic translation initiation factor 2, subunit 2 beta, 38kDa                                                 | Homo sapiens |
| 10494  | serine/threonine kinase 25 (STE20 homolog, yeast)                                                                 | Homo sapiens |
| 9344   | TAO kinase 2                                                                                                      | Homo sapiens |
| 9520   | hypothetical protein FLJ11822; aminopeptidase puromycin sensitive                                                 | Homo sapiens |
| 3182   | heterogeneous nuclear ribonucleoprotein A/B                                                                       | Homo sapiens |
| 9184   | budding uninhibited by benzimidazoles 3 homolog (yeast)                                                           | Homo sapiens |
| 7415   | valosin-containing protein                                                                                        | Homo sapiens |
| 23043  | TRAF2 and NCK interacting kinase                                                                                  | Homo sapiens |
| 8729   | golgi-specific brefeldin A resistant guanine nucleotide exchange factor 1                                         | Homo sapiens |
| 967    | CD63 molecule                                                                                                     | Homo sapiens |
| 3655   | integrin, alpha 6                                                                                                 | Homo sapiens |
| 2760   | GM2 ganglioside activator                                                                                         | Homo sapiens |
| 826    | calpain, small subunit 1                                                                                          | Homo sapiens |
| 535    | ATPase, H+ transporting, lysosomal V0 subunit a1                                                                  | Homo sapiens |
| 10576  | chaperonin containing TCP1, subunit 2 (beta)                                                                      | Homo sapiens |
| 1019   | cyclin-dependent kinase 4                                                                                         | Homo sapiens |
| 10564  | ADP-ribosylation factor guanine nucleotide-exchange factor 2 (brefeldin A-inhibited)                              | Homo sapiens |
| 5479   | peptidylprolyl isomerase B (cyclophilin B)                                                                        | Homo sapiens |
| 57610  | RAN binding protein 10                                                                                            | Homo sapiens |
| 10910  | SGT1, suppressor of G2 allele of SKP1 (S. cerevisiae)                                                             | Homo sapiens |
| 81542  | thioredoxin-related transmembrane protein 1                                                                       | Homo sapiens |
| 5527   | protein phosphatase 2, regulatory subunit B', gamma isoform                                                       | Homo sapiens |
| 60678  | eukaryotic elongation factor, selenocysteine-tRNA-specific                                                        | Homo sapiens |
| 9114   | ATPase, H+ transporting, lysosomal 38kDa, V0 subunit d1                                                           | Homo sapiens |
| 7408   | vasodilator-stimulated phosphoprotein                                                                             | Homo sapiens |
| 9578   | CDC42 binding protein kinase beta (DMPK-like)                                                                     | Homo sapiens |
| 7332   | ubiquitin-conjugating enzyme E2L 3                                                                                | Homo sapiens |
| 10528  | NOP56 ribonucleoprotein homolog (yeast)                                                                           | Homo sapiens |
| 11315  | Parkinson disease (autosomal recessive, early onset) 7                                                            | Homo sapiens |
| 2773   | guanine nucleotide binding protein (G protein), alpha inhibiting activity polypeptide 3                           | Homo sapiens |
| 5692   | proteasome (prosome, macropain) subunit, beta type, 4                                                             | Homo sapiens |
| 2052   | epoxide hydrolase 1, microsomal (xenobiotic)                                                                      | Homo sapiens |
| 22824  | heat shock 70kDa protein 4-like                                                                                   | Homo sapiens |
| 27037  | TRM2 tRNA methyltransferase 2 homolog A (S. cerevisiae)                                                           | Homo sapiens |
| 51433  | anaphase promoting complex subunit 5                                                                              | Homo sapiens |
| 5563   | protein kinase, AMP-activated, alpha 2 catalytic subunit                                                          | Homo sapiens |
| 4048   | leukotriene A4 hydrolase                                                                                          | Homo sapiens |
| 2157   | coagulation factor VIII, procoagulant component                                                                   | Homo sapiens |
| 5127   | PCTAIRE protein kinase 1                                                                                          | Homo sapiens |

|        |                                                                                                                                                                                                                                                                                                                                               |              |
|--------|-----------------------------------------------------------------------------------------------------------------------------------------------------------------------------------------------------------------------------------------------------------------------------------------------------------------------------------------------|--------------|
| 6712   | spectrin, beta, non-erythrocytic 2                                                                                                                                                                                                                                                                                                            | Homo sapiens |
| 975    | CD81 molecule                                                                                                                                                                                                                                                                                                                                 | Homo sapiens |
| 9601   | protein disulfide isomerase family A, member 4                                                                                                                                                                                                                                                                                                | Homo sapiens |
| 8189   | symplekin                                                                                                                                                                                                                                                                                                                                     | Homo sapiens |
| 2048   | EPH receptor B2                                                                                                                                                                                                                                                                                                                               | Homo sapiens |
| 6431   | splicing factor, arginine/serine-rich 6; similar to arginine/serine-rich splicing factor 6                                                                                                                                                                                                                                                    | Homo sapiens |
| 6147   | ribosomal protein L23a pseudogene 63; ribosomal protein L23a pseudogene 75; ribosomal protein L23a pseudogene 37; ribosomal protein L23a pseudogene 65; ribosomal protein L23a pseudogene 43; ribosomal protein L23a pseudogene 44; ribosomal protein L23a                                                                                    | Homo sapiens |
| 6102   | retinitis pigmentosa 2 (X-linked recessive)                                                                                                                                                                                                                                                                                                   | Homo sapiens |
| 64837  | kinesin light chain 2                                                                                                                                                                                                                                                                                                                         | Homo sapiens |
| 3843   | importin 5                                                                                                                                                                                                                                                                                                                                    | Homo sapiens |
| 537    | ATPase, H <sup>+</sup> transporting, lysosomal accessory protein 1                                                                                                                                                                                                                                                                            | Homo sapiens |
| 10767  | HBS1-like (S. cerevisiae)                                                                                                                                                                                                                                                                                                                     | Homo sapiens |
| 56829  | zinc finger CCCH-type, antiviral 1                                                                                                                                                                                                                                                                                                            | Homo sapiens |
| 112936 | vacuolar protein sorting 26 homolog B (S. pombe)                                                                                                                                                                                                                                                                                              | Homo sapiens |
| 832    | capping protein (actin filament) muscle Z-line, beta                                                                                                                                                                                                                                                                                          | Homo sapiens |
| 7525   | v-yes-1 Yamaguchi sarcoma viral oncogene homolog 1                                                                                                                                                                                                                                                                                            | Homo sapiens |
| 10670  | Ras-related GTP binding A                                                                                                                                                                                                                                                                                                                     | Homo sapiens |
| 51386  | eukaryotic translation initiation factor 3, subunit L                                                                                                                                                                                                                                                                                         | Homo sapiens |
| 9118   | internexin neuronal intermediate filament protein, alpha                                                                                                                                                                                                                                                                                      | Homo sapiens |
| 3106   | major histocompatibility complex, class I, C; major histocompatibility complex, class I, B                                                                                                                                                                                                                                                    | Homo sapiens |
| 3107   | major histocompatibility complex, class I, C; major histocompatibility complex, class I, B                                                                                                                                                                                                                                                    | Homo sapiens |
| 1290   | collagen, type V, alpha 2                                                                                                                                                                                                                                                                                                                     | Homo sapiens |
| 285636 | chromosome 5 open reading frame 51                                                                                                                                                                                                                                                                                                            | Homo sapiens |
| 1627   | drebrin 1                                                                                                                                                                                                                                                                                                                                     | Homo sapiens |
| 51552  | RAB14, member RAS oncogene family                                                                                                                                                                                                                                                                                                             | Homo sapiens |
| 7086   | transketolase                                                                                                                                                                                                                                                                                                                                 | Homo sapiens |
| 2931   | glycogen synthase kinase 3 alpha                                                                                                                                                                                                                                                                                                              | Homo sapiens |
| 9255   | aminoacyl tRNA synthetase complex-interacting multifunctional protein 1                                                                                                                                                                                                                                                                       | Homo sapiens |
| 5230   | phosphoglycerate kinase 1                                                                                                                                                                                                                                                                                                                     | Homo sapiens |
| 23499  | microtubule-actin crosslinking factor 1                                                                                                                                                                                                                                                                                                       | Homo sapiens |
| 3909   | laminin, alpha 3                                                                                                                                                                                                                                                                                                                              | Homo sapiens |
| 2159   | coagulation factor X                                                                                                                                                                                                                                                                                                                          | Homo sapiens |
| 3327   | heat shock protein 90kDa alpha (cytosolic), class B member 3 (pseudogene)                                                                                                                                                                                                                                                                     | Homo sapiens |
| 51082  | polymerase (RNA) I polypeptide D, 16kDa                                                                                                                                                                                                                                                                                                       | Homo sapiens |
| 1147   | conserved helix-loop-helix ubiquitous kinase                                                                                                                                                                                                                                                                                                  | Homo sapiens |
| 293    | solute carrier family 25 (mitochondrial carrier; adenine nucleotide translocator), member 6                                                                                                                                                                                                                                                   | Homo sapiens |
| 50618  | intersectin 2                                                                                                                                                                                                                                                                                                                                 | Homo sapiens |
| 10644  | insulin-like growth factor 2 mRNA binding protein 2                                                                                                                                                                                                                                                                                           | Homo sapiens |
| 51112  | tetratricopeptide repeat domain 15                                                                                                                                                                                                                                                                                                            | Homo sapiens |
| 5305   | phosphatidylinositol-5-phosphate 4-kinase, type II, alpha                                                                                                                                                                                                                                                                                     | Homo sapiens |
| 91949  | component of oligomeric golgi complex 7                                                                                                                                                                                                                                                                                                       | Homo sapiens |
| 51125  | golgi autoantigen, golgin subfamily a, 7                                                                                                                                                                                                                                                                                                      | Homo sapiens |
| 8936   | WAS protein family, member 1                                                                                                                                                                                                                                                                                                                  | Homo sapiens |
| 1654   | DEAD (Asp-Glu-Ala-Asp) box polypeptide 3, X-linked                                                                                                                                                                                                                                                                                            | Homo sapiens |
| 7347   | ubiquitin carboxyl-terminal esterase L3 (ubiquitin thiolesterase)                                                                                                                                                                                                                                                                             | Homo sapiens |
| 54187  | N-acetylneuraminic acid synthase                                                                                                                                                                                                                                                                                                              | Homo sapiens |
| 1824   | desmocollin 2                                                                                                                                                                                                                                                                                                                                 | Homo sapiens |
| 10615  | sperm associated antigen 5                                                                                                                                                                                                                                                                                                                    | Homo sapiens |
| 57153  | solute carrier family 44, member 2                                                                                                                                                                                                                                                                                                            | Homo sapiens |
| 55342  | spermatid perinuclear RNA binding protein                                                                                                                                                                                                                                                                                                     | Homo sapiens |
| 26128  | KIAA1279                                                                                                                                                                                                                                                                                                                                      | Homo sapiens |
| 50848  | F11 receptor                                                                                                                                                                                                                                                                                                                                  | Homo sapiens |
| 220988 | heterogeneous nuclear ribonucleoprotein A3                                                                                                                                                                                                                                                                                                    | Homo sapiens |
| 8370   | histone cluster 1, H4l; histone cluster 1, H4k; histone cluster 4, H4; histone cluster 1, H4h; histone cluster 1, H4j; histone cluster 1, H4i; histone cluster 1, H4d; histone cluster 1, H4c; histone cluster 1, H4f; histone cluster 1, H4e; histone cluster 1, H4b; histone cluster 1, H4a;                                                | Homo sapiens |
| 554313 | histone cluster 2, H4a; histone cluster 2, H4b histone cluster 1, H4l; histone cluster 1, H4k; histone cluster 4, H4; histone cluster 1, H4h; histone cluster 1, H4j; histone cluster 1, H4i; histone cluster 1, H4d; histone cluster 1, H4c; histone cluster 1, H4f; histone cluster 1, H4e; histone cluster 1, H4b; histone cluster 1, H4a; | Homo sapiens |
| 8360   | histone cluster 2, H4a; histone cluster 2, H4b histone cluster 1, H4l; histone cluster 1, H4k; histone cluster 4, H4; histone cluster 1, H4h; histone cluster 1, H4j; histone cluster 1, H4i; histone cluster 1, H4d; histone cluster 1, H4c;                                                                                                 | Homo sapiens |
| 8363   | histone cluster 2, H4a; histone cluster 2, H4b histone cluster 1, H4l; histone cluster 1, H4k; histone cluster 4, H4; histone cluster 1, H4h; histone cluster 1, H4j; histone cluster 1, H4i; histone cluster 1, H4d; histone cluster 1, H4c;                                                                                                 | Homo sapiens |
| 8368   | histone cluster 1, H4f; histone cluster 1, H4e; histone cluster 1, H4b; histone cluster 1, H4a; histone cluster 2, H4a; histone cluster 2, H4b histone cluster 1, H4l; histone cluster 1, H4k; histone cluster 4, H4; histone cluster 1, H4h;                                                                                                 | Homo sapiens |
| 8365   | histone cluster 1, H4j; histone cluster 1, H4i; histone cluster 1, H4d; histone cluster 1, H4c; histone cluster 1, H4f; histone cluster 1, H4e; histone cluster 1, H4b; histone cluster 1, H4a;                                                                                                                                               | Homo sapiens |
| 8294   | histone cluster 1, H4l; histone cluster 1, H4k; histone cluster 4, H4; histone cluster 1, H4h; histone cluster 1, H4j; histone cluster 1, H4i; histone cluster 1, H4d; histone cluster 1, H4c; histone cluster 1, H4f; histone cluster 1, H4e; histone cluster 1, H4b; histone cluster 1, H4a;                                                | Homo sapiens |
|        | histone cluster 2, H4a; histone cluster 2, H4b                                                                                                                                                                                                                                                                                                |              |

|        |                                                                                                                                                                                                                                                                                                                                               |              |
|--------|-----------------------------------------------------------------------------------------------------------------------------------------------------------------------------------------------------------------------------------------------------------------------------------------------------------------------------------------------|--------------|
| 8364   | histone cluster 1, H4l; histone cluster 1, H4k; histone cluster 4, H4; histone cluster 1, H4h; histone cluster 1, H4j; histone cluster 1, H4i; histone cluster 1, H4d; histone cluster 1, H4c; histone cluster 1, H4f; histone cluster 1, H4e; histone cluster 1, H4b; histone cluster 1, H4a; histone cluster 2, H4a; histone cluster 2, H4b | Homo sapiens |
| 8361   | histone cluster 1, H4l; histone cluster 1, H4k; histone cluster 4, H4; histone cluster 1, H4h; histone cluster 1, H4j; histone cluster 1, H4i; histone cluster 1, H4d; histone cluster 1, H4c; histone cluster 1, H4f; histone cluster 1, H4e; histone cluster 1, H4b; histone cluster 1, H4a; histone cluster 2, H4a; histone cluster 2, H4b | Homo sapiens |
| 8366   | histone cluster 1, H4l; histone cluster 1, H4k; histone cluster 4, H4; histone cluster 1, H4h; histone cluster 1, H4j; histone cluster 1, H4i; histone cluster 1, H4d; histone cluster 1, H4c; histone cluster 1, H4f; histone cluster 1, H4e; histone cluster 1, H4b; histone cluster 1, H4a; histone cluster 2, H4a; histone cluster 2, H4b | Homo sapiens |
| 8362   | histone cluster 1, H4l; histone cluster 1, H4k; histone cluster 4, H4; histone cluster 1, H4h; histone cluster 1, H4j; histone cluster 1, H4i; histone cluster 1, H4d; histone cluster 1, H4c; histone cluster 1, H4f; histone cluster 1, H4e; histone cluster 1, H4b; histone cluster 1, H4a; histone cluster 2, H4a; histone cluster 2, H4b | Homo sapiens |
| 121504 | histone cluster 1, H4l; histone cluster 1, H4k; histone cluster 4, H4; histone cluster 1, H4h; histone cluster 1, H4j; histone cluster 1, H4i; histone cluster 1, H4d; histone cluster 1, H4c; histone cluster 1, H4f; histone cluster 1, H4e; histone cluster 1, H4b; histone cluster 1, H4a; histone cluster 2, H4a; histone cluster 2, H4b | Homo sapiens |
| 8359   | histone cluster 1, H4l; histone cluster 1, H4k; histone cluster 4, H4; histone cluster 1, H4h; histone cluster 1, H4j; histone cluster 1, H4i; histone cluster 1, H4d; histone cluster 1, H4c; histone cluster 1, H4f; histone cluster 1, H4e; histone cluster 1, H4b; histone cluster 1, H4a; histone cluster 2, H4a; histone cluster 2, H4b | Homo sapiens |
| 8367   | histone cluster 1, H4l; histone cluster 1, H4k; histone cluster 4, H4; histone cluster 1, H4h; histone cluster 1, H4j; histone cluster 1, H4i; histone cluster 1, H4d; histone cluster 1, H4c; histone cluster 1, H4f; histone cluster 1, H4e; histone cluster 1, H4b; histone cluster 1, H4a; histone cluster 2, H4a; histone cluster 2, H4b | Homo sapiens |
| 60     | actin, beta                                                                                                                                                                                                                                                                                                                                   | Homo sapiens |
| 552900 | bolA homolog 2 (E. coli); bolA homolog 2B (E. coli)                                                                                                                                                                                                                                                                                           | Homo sapiens |
| 654483 | bolA homolog 2 (E. coli); bolA homolog 2B (E. coli)                                                                                                                                                                                                                                                                                           | Homo sapiens |
| 10066  | secretory carrier membrane protein 2                                                                                                                                                                                                                                                                                                          | Homo sapiens |
| 6635   | small nuclear ribonucleoprotein polypeptide E-like 1; small nuclear ribonucleoprotein polypeptide E; similar to hCG23490                                                                                                                                                                                                                      | Homo sapiens |
| 6813   | syntaxin binding protein 2                                                                                                                                                                                                                                                                                                                    | Homo sapiens |
| 2539   | glucose-6-phosphate dehydrogenase                                                                                                                                                                                                                                                                                                             | Homo sapiens |
| 23644  | enhancer of mRNA decapping 4                                                                                                                                                                                                                                                                                                                  | Homo sapiens |
| 9861   | proteasome (prosome, macropain) 26S subunit, non-ATPase, 6                                                                                                                                                                                                                                                                                    | Homo sapiens |
| 23041  | MON2 homolog (S. cerevisiae)                                                                                                                                                                                                                                                                                                                  | Homo sapiens |
| 5464   | pyrophosphatase (inorganic) 1                                                                                                                                                                                                                                                                                                                 | Homo sapiens |
| 84617  | tubulin, beta 6                                                                                                                                                                                                                                                                                                                               | Homo sapiens |
| 5110   | protein-L-isoaspartate (D-aspartate) O-methyltransferase                                                                                                                                                                                                                                                                                      | Homo sapiens |
| 2946   | glutathione S-transferase mu 2 (muscle)                                                                                                                                                                                                                                                                                                       | Homo sapiens |
| 5423   | polymerase (DNA directed), beta                                                                                                                                                                                                                                                                                                               | Homo sapiens |
| 7358   | UDP-glucose dehydrogenase                                                                                                                                                                                                                                                                                                                     | Homo sapiens |
| 10552  | actin related protein 2/3 complex, subunit 1A, 41kDa                                                                                                                                                                                                                                                                                          | Homo sapiens |
| 10982  | microtubule-associated protein, RP/EB family, member 2                                                                                                                                                                                                                                                                                        | Homo sapiens |
| 727    | complement component 5                                                                                                                                                                                                                                                                                                                        | Homo sapiens |
| 55768  | N-glycanase 1                                                                                                                                                                                                                                                                                                                                 | Homo sapiens |
| 11338  | U2 small nuclear RNA auxiliary factor 2                                                                                                                                                                                                                                                                                                       | Homo sapiens |
| 55610  | coiled-coil domain containing 132                                                                                                                                                                                                                                                                                                             | Homo sapiens |
| 6135   | ribosomal protein L11                                                                                                                                                                                                                                                                                                                         | Homo sapiens |
| 5236   | phosphoglucomutase 1                                                                                                                                                                                                                                                                                                                          | Homo sapiens |
| 8880   | far upstream element (FUSE) binding protein 1                                                                                                                                                                                                                                                                                                 | Homo sapiens |
| 5547   | prolylcarboxypeptidase (angiotensinase C)                                                                                                                                                                                                                                                                                                     | Homo sapiens |
| 5694   | proteasome (prosome, macropain) subunit, beta type, 6                                                                                                                                                                                                                                                                                         | Homo sapiens |
| 6272   | sortilin 1                                                                                                                                                                                                                                                                                                                                    | Homo sapiens |
| 3030   | hydroxyacyl-Coenzyme A dehydrogenase/3-ketoacyl-Coenzyme A thiolase/enoyl-Coenzyme A hydratase (trifunctional protein), alpha subunit                                                                                                                                                                                                         | Homo sapiens |
| 23119  | hypermethylated in cancer 2                                                                                                                                                                                                                                                                                                                   | Homo sapiens |
| 23028  | lysine (K)-specific demethylase 1                                                                                                                                                                                                                                                                                                             | Homo sapiens |
| 7311   | ubiquitin A-52 residue ribosomal protein fusion product 1                                                                                                                                                                                                                                                                                     | Homo sapiens |
| 10238  | WD repeat domain 68                                                                                                                                                                                                                                                                                                                           | Homo sapiens |
| 8751   | ADAM metallopeptidase domain 15                                                                                                                                                                                                                                                                                                               | Homo sapiens |
| 5270   | serpin peptidase inhibitor, clade E (nexin, plasminogen activator inhibitor type 1), member 2                                                                                                                                                                                                                                                 | Homo sapiens |
| 208    | v-akt murine thymoma viral oncogene homolog 2                                                                                                                                                                                                                                                                                                 | Homo sapiens |
| 79709  | glycosyltransferase 25 domain containing 1                                                                                                                                                                                                                                                                                                    | Homo sapiens |
| 6520   | solute carrier family 3 (activators of dibasic and neutral amino acid transport), member 2                                                                                                                                                                                                                                                    | Homo sapiens |
| 23345  | spectrin repeat containing, nuclear envelope 1                                                                                                                                                                                                                                                                                                | Homo sapiens |
| 408050 | NODAL modulator 3; NODAL modulator 1; NODAL modulator 2                                                                                                                                                                                                                                                                                       | Homo sapiens |
| 23420  | NODAL modulator 3; NODAL modulator 1; NODAL modulator 2                                                                                                                                                                                                                                                                                       | Homo sapiens |
| 283820 | NODAL modulator 3; NODAL modulator 1; NODAL modulator 2                                                                                                                                                                                                                                                                                       | Homo sapiens |
| 10189  | THO complex 4                                                                                                                                                                                                                                                                                                                                 | Homo sapiens |
| 311    | annexin A11                                                                                                                                                                                                                                                                                                                                   | Homo sapiens |
| 6232   | ribosomal protein S27 pseudogene 29; ribosomal protein S27 pseudogene 9; ribosomal protein S27 pseudogene 23; ribosomal protein S27 pseudogene 13; ribosomal protein S27; ribosomal protein S27 pseudogene 21; ribosomal protein S27 pseudogene 7; ribosomal protein S27 pseudogene 6; ribosomal protein S27 pseudogene 19                    | Homo sapiens |
| 317772 | histone cluster 2, H2ab                                                                                                                                                                                                                                                                                                                       | Homo sapiens |
| 64149  | chromosome 17 open reading frame 75                                                                                                                                                                                                                                                                                                           | Homo sapiens |
| 11093  | ADAM metallopeptidase with thrombospondin type 1 motif, 13                                                                                                                                                                                                                                                                                    | Homo sapiens |
| 1398   | v-crk sarcoma virus CT10 oncogene homolog (avian)                                                                                                                                                                                                                                                                                             | Homo sapiens |
| 56650  | claudin domain containing 1                                                                                                                                                                                                                                                                                                                   | Homo sapiens |
| 369    | v-raf murine sarcoma 3611 viral oncogene homolog                                                                                                                                                                                                                                                                                              | Homo sapiens |
| 506    | ATP synthase, H+ transporting, mitochondrial F1 complex, beta polypeptide                                                                                                                                                                                                                                                                     | Homo sapiens |

|           |                                                                                                                                                                                       |              |
|-----------|---------------------------------------------------------------------------------------------------------------------------------------------------------------------------------------|--------------|
| 4860      | nucleoside phosphorylase                                                                                                                                                              | Homo sapiens |
| 10399     | guanine nucleotide binding protein (G protein), beta polypeptide 2-like 1                                                                                                             | Homo sapiens |
| 58533     | sorting nexin 6                                                                                                                                                                       | Homo sapiens |
| 4924      | nucleobindin 1                                                                                                                                                                        | Homo sapiens |
| 114876    | oxysterol binding protein-like 1A                                                                                                                                                     | Homo sapiens |
| 3181      | heterogeneous nuclear ribonucleoprotein A2/B1                                                                                                                                         | Homo sapiens |
| 5717      | proteasome (prosome, macropain) 26S subunit, non-ATPase, 11                                                                                                                           | Homo sapiens |
| 9391      | cytosolic iron-sulfur protein assembly 1 homolog (S. cerevisiae)                                                                                                                      | Homo sapiens |
| 6904      | tubulin folding cofactor D                                                                                                                                                            | Homo sapiens |
| 80230     | RUN and FYVE domain containing 1                                                                                                                                                      | Homo sapiens |
| 1652      | D-dopachrome tautomerase                                                                                                                                                              | Homo sapiens |
| 6132      | ribosomal protein L8; ribosomal protein L8 pseudogene 2                                                                                                                               | Homo sapiens |
| 2799      | glucosamine (N-acetyl)-6-sulfatase                                                                                                                                                    | Homo sapiens |
| 140890    | splicing factor, arginine/serine-rich 12                                                                                                                                              | Homo sapiens |
| 1727      | cytochrome b5 reductase 3                                                                                                                                                             | Homo sapiens |
| 3491      | cysteine-rich, angiogenic inducer, 61                                                                                                                                                 | Homo sapiens |
| 11146     | glomulin, FKBP associated protein                                                                                                                                                     | Homo sapiens |
| 10137     | RNA binding motif protein 12; copine I                                                                                                                                                | Homo sapiens |
| 8904      | RNA binding motif protein 12; copine I                                                                                                                                                | Homo sapiens |
| 6949      | Treacher Collins-Franceschetti syndrome 1                                                                                                                                             | Homo sapiens |
| 3494      | immunoglobulin heavy constant alpha 2 (A2m marker)                                                                                                                                    | Homo sapiens |
| 5962      | radixin                                                                                                                                                                               | Homo sapiens |
| 253260    | RPTOR independent companion of MTOR, complex 2                                                                                                                                        | Homo sapiens |
| 3312      | heat shock 70kDa protein 8                                                                                                                                                            | Homo sapiens |
| 3417      | isocitrate dehydrogenase 1 (NADP+), soluble                                                                                                                                           | Homo sapiens |
| 9352      | thioredoxin-like 1                                                                                                                                                                    | Homo sapiens |
| 3646      | eukaryotic translation initiation factor 3, subunit E                                                                                                                                 | Homo sapiens |
| 6767      | similar to heat shock 70kD protein binding protein; suppression of tumorigenicity 13 (colon carcinoma) (Hsp70 interacting protein)                                                    | Homo sapiens |
| 4869      | nucleophosmin 1 (nucleolar phosphoprotein B23, numatrin) pseudogene 21; hypothetical LOC100131044; similar to nucleophosmin 1; nucleophosmin (nucleolar phosphoprotein B23, numatrin) | Homo sapiens |
| 27161     | eukaryotic translation initiation factor 2C, 2                                                                                                                                        | Homo sapiens |
| 6809      | syntaxin 3                                                                                                                                                                            | Homo sapiens |
| 4076      | cell cycle associated protein 1                                                                                                                                                       | Homo sapiens |
| 10844     | tubulin, gamma complex associated protein 2                                                                                                                                           | Homo sapiens |
| 9482      | syntaxin 8                                                                                                                                                                            | Homo sapiens |
| 10432     | RNA binding motif protein 14; RNA binding motif protein 4                                                                                                                             | Homo sapiens |
| 5936      | RNA binding motif protein 14; RNA binding motif protein 4                                                                                                                             | Homo sapiens |
| 6222      | ribosomal protein S18 pseudogene 12; ribosomal protein S18 pseudogene 5; ribosomal protein S18                                                                                        | Homo sapiens |
| 388339    | ribosomal protein S18 pseudogene 12; ribosomal protein S18 pseudogene 5; ribosomal protein S18                                                                                        | Homo sapiens |
| 100131863 | ribosomal protein S18 pseudogene 12; ribosomal protein S18 pseudogene 5; ribosomal protein S18                                                                                        | Homo sapiens |
| 3996      | lethal giant larvae homolog 1 (Drosophila)                                                                                                                                            | Homo sapiens |
| 5287      | phosphoinositide-3-kinase, class 2, beta polypeptide                                                                                                                                  | Homo sapiens |
| 5531      | protein phosphatase 4 (formerly X), catalytic subunit                                                                                                                                 | Homo sapiens |
| 2629      | glucosidase, beta; acid (includes glucosylceramidase)                                                                                                                                 | Homo sapiens |
| 4666      | nascent polypeptide-associated complex alpha subunit                                                                                                                                  | Homo sapiens |
| 10211     | flotillin 1                                                                                                                                                                           | Homo sapiens |
| 643531    | ribosomal protein L29 pseudogene 9; ribosomal protein L29 pseudogene 12; ribosomal protein L29 pseudogene 11; ribosomal protein L29; ribosomal protein L29 pseudogene 26              | Homo sapiens |
| 283412    | ribosomal protein L29 pseudogene 9; ribosomal protein L29 pseudogene 12; ribosomal protein L29 pseudogene 11; ribosomal protein L29; ribosomal protein L29 pseudogene 26              | Homo sapiens |
| 100131713 | ribosomal protein L29 pseudogene 9; ribosomal protein L29 pseudogene 12; ribosomal protein L29 pseudogene 11; ribosomal protein L29; ribosomal protein L29 pseudogene 26              | Homo sapiens |
| 647285    | ribosomal protein L29 pseudogene 9; ribosomal protein L29 pseudogene 12; ribosomal protein L29 pseudogene 11; ribosomal protein L29; ribosomal protein L29 pseudogene 26              | Homo sapiens |
| 6159      | ribosomal protein L29 pseudogene 9; ribosomal protein L29 pseudogene 12; ribosomal protein L29 pseudogene 11; ribosomal protein L29; ribosomal protein L29 pseudogene 26              | Homo sapiens |
| 3482      | insulin-like growth factor 2 receptor                                                                                                                                                 | Homo sapiens |
| 5594      | mitogen-activated protein kinase 1                                                                                                                                                    | Homo sapiens |
| 3064      | huntingtin                                                                                                                                                                            | Homo sapiens |
| 5861      | RAB1A, member RAS oncogene family                                                                                                                                                     | Homo sapiens |
| 7453      | tryptophanyl-tRNA synthetase                                                                                                                                                          | Homo sapiens |
| 317       | apoptotic peptidase activating factor 1                                                                                                                                               | Homo sapiens |
| 27335     | eukaryotic translation initiation factor 3, subunit K                                                                                                                                 | Homo sapiens |
| 23193     | glucosidase, alpha; neutral AB                                                                                                                                                        | Homo sapiens |
| 27430     | methionine adenosyltransferase II, beta                                                                                                                                               | Homo sapiens |
| 25963     | transmembrane protein 87A                                                                                                                                                             | Homo sapiens |
| 100128936 | ribosomal protein L10a pseudogene 6; ribosomal protein L10a; ribosomal protein L10a pseudogene 9                                                                                      | Homo sapiens |
| 4736      | ribosomal protein L10a pseudogene 6; ribosomal protein L10a; ribosomal protein L10a pseudogene 9                                                                                      | Homo sapiens |
| 728979    | ribosomal protein L10a pseudogene 6; ribosomal protein L10a; ribosomal protein L10a pseudogene 9                                                                                      | Homo sapiens |
| 83872     | hemcentin 1                                                                                                                                                                           | Homo sapiens |
| 79065     | ATG9 autophagy related 9 homolog A (S. cerevisiae)                                                                                                                                    | Homo sapiens |
| 9554      | SEC22 vesicle trafficking protein homolog B (S. cerevisiae)                                                                                                                           | Homo sapiens |
| 23157     | septin 6                                                                                                                                                                              | Homo sapiens |
| 64841     | glucosamine-phosphate N-acetyltransferase 1                                                                                                                                           | Homo sapiens |
| 284207    | meteorin, glial cell differentiation regulator-like; similar to meteorin, glial cell differentiation regulator-like                                                                   | Homo sapiens |
| 5052      | peroxiredoxin 1                                                                                                                                                                       | Homo sapiens |
| 9577      | brain and reproductive organ-expressed (TNFRSF1A modulator)                                                                                                                           | Homo sapiens |
| 9945      | glutamine-fructose-6-phosphate transaminase 2                                                                                                                                         | Homo sapiens |
| 9690      | ubiquitin protein ligase E3C                                                                                                                                                          | Homo sapiens |
| 720       | complement component 4A (Rodgers blood group)                                                                                                                                         | Homo sapiens |

|           |                                                                                                                                                                                                                                                                                                                    |              |
|-----------|--------------------------------------------------------------------------------------------------------------------------------------------------------------------------------------------------------------------------------------------------------------------------------------------------------------------|--------------|
| 1499      | catenin (cadherin-associated protein), beta 1, 88kDa                                                                                                                                                                                                                                                               | Homo sapiens |
| 5335      | phospholipase C, gamma 1                                                                                                                                                                                                                                                                                           | Homo sapiens |
| 5216      | profilin 1                                                                                                                                                                                                                                                                                                         | Homo sapiens |
| 440589    | ribosomal protein S2 pseudogene 8; ribosomal protein S2 pseudogene 11; ribosomal protein S2 pseudogene 5; ribosomal protein S2 pseudogene 12; ribosomal protein S2 pseudogene 51; ribosomal protein S2 pseudogene 17; ribosomal protein S2 pseudogene 55; ribosomal protein S2 pseudogene 20; ribosomal protein S2 | Homo sapiens |
| 286444    | ribosomal protein S2 pseudogene 8; ribosomal protein S2 pseudogene 11; ribosomal protein S2 pseudogene 5; ribosomal protein S2 pseudogene 12; ribosomal protein S2 pseudogene 51; ribosomal protein S2 pseudogene 17; ribosomal protein S2 pseudogene 55; ribosomal protein S2 pseudogene 20; ribosomal protein S2 | Homo sapiens |
| 729679    | ribosomal protein S2 pseudogene 8; ribosomal protein S2 pseudogene 11; ribosomal protein S2 pseudogene 5; ribosomal protein S2 pseudogene 12; ribosomal protein S2 pseudogene 51; ribosomal protein S2 pseudogene 17; ribosomal protein S2 pseudogene 55; ribosomal protein S2 pseudogene 20; ribosomal protein S2 | Homo sapiens |
| 650901    | ribosomal protein S2 pseudogene 8; ribosomal protein S2 pseudogene 11; ribosomal protein S2 pseudogene 5; ribosomal protein S2 pseudogene 12; ribosomal protein S2 pseudogene 51; ribosomal protein S2 pseudogene 17; ribosomal protein S2 pseudogene 55; ribosomal protein S2 pseudogene 20; ribosomal protein S2 | Homo sapiens |
| 100130562 | ribosomal protein S2 pseudogene 8; ribosomal protein S2 pseudogene 11; ribosomal protein S2 pseudogene 5; ribosomal protein S2 pseudogene 12; ribosomal protein S2 pseudogene 51; ribosomal protein S2 pseudogene 17; ribosomal protein S2 pseudogene 55; ribosomal protein S2 pseudogene 20; ribosomal protein S2 | Homo sapiens |
| 343184    | ribosomal protein S2 pseudogene 8; ribosomal protein S2 pseudogene 11; ribosomal protein S2 pseudogene 5; ribosomal protein S2 pseudogene 12; ribosomal protein S2 pseudogene 51; ribosomal protein S2 pseudogene 17; ribosomal protein S2 pseudogene 55; ribosomal protein S2 pseudogene 20; ribosomal protein S2 | Homo sapiens |
| 400963    | ribosomal protein S2 pseudogene 8; ribosomal protein S2 pseudogene 11; ribosomal protein S2 pseudogene 5; ribosomal protein S2 pseudogene 12; ribosomal protein S2 pseudogene 51; ribosomal protein S2 pseudogene 17; ribosomal protein S2 pseudogene 55; ribosomal protein S2 pseudogene 20; ribosomal protein S2 | Homo sapiens |
| 645018    | ribosomal protein S2 pseudogene 8; ribosomal protein S2 pseudogene 11; ribosomal protein S2 pseudogene 5; ribosomal protein S2 pseudogene 12; ribosomal protein S2 pseudogene 51; ribosomal protein S2 pseudogene 17; ribosomal protein S2 pseudogene 55; ribosomal protein S2 pseudogene 20; ribosomal protein S2 | Homo sapiens |
| 6187      | ribosomal protein S2 pseudogene 8; ribosomal protein S2 pseudogene 11; ribosomal protein S2 pseudogene 5; ribosomal protein S2 pseudogene 12; ribosomal protein S2 pseudogene 51; ribosomal protein S2 pseudogene 17; ribosomal protein S2 pseudogene 55; ribosomal protein S2 pseudogene 20; ribosomal protein S2 | Homo sapiens |
| 3265      | v-Ha-ras Harvey rat sarcoma viral oncogene homolog                                                                                                                                                                                                                                                                 | Homo sapiens |
| 10294     | DnaJ (Hsp40) homolog, subfamily A, member 2                                                                                                                                                                                                                                                                        | Homo sapiens |
| 9550      | ATPase, H <sup>+</sup> transporting, lysosomal 13kDa, V1 subunit G1                                                                                                                                                                                                                                                | Homo sapiens |
| 2674      | GDNF family receptor alpha 1                                                                                                                                                                                                                                                                                       | Homo sapiens |
| 85439     | stonin 2                                                                                                                                                                                                                                                                                                           | Homo sapiens |
| 149371    | exocyst complex component 8                                                                                                                                                                                                                                                                                        | Homo sapiens |
| 23753     | stromal cell-derived factor 2-like 1                                                                                                                                                                                                                                                                               | Homo sapiens |
| 8675      | syntaxin 16                                                                                                                                                                                                                                                                                                        | Homo sapiens |
| 23        | ATP-binding cassette, sub-family F (GCN20), member 1                                                                                                                                                                                                                                                               | Homo sapiens |
| 2273      | four and a half LIM domains 1                                                                                                                                                                                                                                                                                      | Homo sapiens |
| 5432      | polymerase (RNA) II (DNA directed) polypeptide C, 33kDa                                                                                                                                                                                                                                                            | Homo sapiens |
| 1759      | dynamitin 1                                                                                                                                                                                                                                                                                                        | Homo sapiens |
| 10163     | WAS protein family, member 2                                                                                                                                                                                                                                                                                       | Homo sapiens |
| 8907      | adaptor-related protein complex 1, mu 1 subunit                                                                                                                                                                                                                                                                    | Homo sapiens |
| 83473     | katanin p60 subunit A-like 2                                                                                                                                                                                                                                                                                       | Homo sapiens |
| 5806      | pentraxin-related gene, rapidly induced by IL-1 beta                                                                                                                                                                                                                                                               | Homo sapiens |
| 9793      | cytoskeleton associated protein 5                                                                                                                                                                                                                                                                                  | Homo sapiens |
| 3512      | immunoglobulin J polypeptide, linker protein for immunoglobulin alpha and mu polypeptides                                                                                                                                                                                                                          | Homo sapiens |
| 553115    | penta-EF-hand domain containing 1                                                                                                                                                                                                                                                                                  | Homo sapiens |
| 285527    | FRY-like                                                                                                                                                                                                                                                                                                           | Homo sapiens |
| 2017      | cortactin                                                                                                                                                                                                                                                                                                          | Homo sapiens |
| 3688      | integrin, beta 1 (fibronectin receptor, beta polypeptide, antigen CD29 includes MDF2, MSK12)                                                                                                                                                                                                                       | Homo sapiens |
| 80347     | Coenzyme A synthase                                                                                                                                                                                                                                                                                                | Homo sapiens |
| 2132      | exostoses (multiple) 2                                                                                                                                                                                                                                                                                             | Homo sapiens |
| 10130     | protein disulfide isomerase family A, member 6                                                                                                                                                                                                                                                                     | Homo sapiens |
| 3148      | high-mobility group box 2                                                                                                                                                                                                                                                                                          | Homo sapiens |
| 4125      | mannosidase, alpha, class 2B, member 1                                                                                                                                                                                                                                                                             | Homo sapiens |
| 1173      | adaptor-related protein complex 2, mu 1 subunit                                                                                                                                                                                                                                                                    | Homo sapiens |
| 10051     | structural maintenance of chromosomes 4                                                                                                                                                                                                                                                                            | Homo sapiens |
| 1456      | casein kinase 1, gamma 3                                                                                                                                                                                                                                                                                           | Homo sapiens |
| 6158      | ribosomal protein L28                                                                                                                                                                                                                                                                                              | Homo sapiens |
| 10890     | RAB10, member RAS oncogene family                                                                                                                                                                                                                                                                                  | Homo sapiens |
| 987       | LPS-responsive vesicle trafficking, beach and anchor containing                                                                                                                                                                                                                                                    | Homo sapiens |
| 374897    | suprabasin                                                                                                                                                                                                                                                                                                         | Homo sapiens |
| 4179      | CD46 molecule, complement regulatory protein                                                                                                                                                                                                                                                                       | Homo sapiens |
| 23233     | exocyst complex component 6B                                                                                                                                                                                                                                                                                       | Homo sapiens |
| 10085     | EGF-like repeats and discoidin I-like domains 3                                                                                                                                                                                                                                                                    | Homo sapiens |
| 7280      | tubulin, beta 2A                                                                                                                                                                                                                                                                                                   | Homo sapiens |
| 9319      | thyroid hormone receptor interactor 13                                                                                                                                                                                                                                                                             | Homo sapiens |
| 1271      | ciliary neurotrophic factor receptor                                                                                                                                                                                                                                                                               | Homo sapiens |
| 57493     | HEG homolog 1 (zebrafish)                                                                                                                                                                                                                                                                                          | Homo sapiens |
| 116143    | WD repeat domain 92                                                                                                                                                                                                                                                                                                | Homo sapiens |
| 4690      | NCK adaptor protein 1                                                                                                                                                                                                                                                                                              | Homo sapiens |
| 7249      | tuberous sclerosis 2                                                                                                                                                                                                                                                                                               | Homo sapiens |
| 2512      | similar to ferritin, light polypeptide; ferritin, light polypeptide                                                                                                                                                                                                                                                | Homo sapiens |
| 2068      | excision repair cross-complementing rodent repair deficiency, complementation group 2                                                                                                                                                                                                                              | Homo sapiens |

|        |                                                                                                                                                                                                                                                                                                                                                                                                                                                                                |              |
|--------|--------------------------------------------------------------------------------------------------------------------------------------------------------------------------------------------------------------------------------------------------------------------------------------------------------------------------------------------------------------------------------------------------------------------------------------------------------------------------------|--------------|
| 56944  | olfactomedin-like 3                                                                                                                                                                                                                                                                                                                                                                                                                                                            | Homo sapiens |
| 7837   | peroxidasin homolog (Drosophila)                                                                                                                                                                                                                                                                                                                                                                                                                                               | Homo sapiens |
| 55970  | guanine nucleotide binding protein (G protein), gamma 12                                                                                                                                                                                                                                                                                                                                                                                                                       | Homo sapiens |
| 94015  | twety homolog 2 (Drosophila)                                                                                                                                                                                                                                                                                                                                                                                                                                                   | Homo sapiens |
| 11100  | heterogeneous nuclear ribonucleoprotein U-like 1                                                                                                                                                                                                                                                                                                                                                                                                                               | Homo sapiens |
| 8140   | solute carrier family 7 (cationic amino acid transporter, y+ system), member 5                                                                                                                                                                                                                                                                                                                                                                                                 | Homo sapiens |
| 399687 | myosin XVIIIa                                                                                                                                                                                                                                                                                                                                                                                                                                                                  | Homo sapiens |
| 10788  | IQ motif containing GTPase activating protein 2                                                                                                                                                                                                                                                                                                                                                                                                                                | Homo sapiens |
| 1435   | colony stimulating factor 1 (macrophage)                                                                                                                                                                                                                                                                                                                                                                                                                                       | Homo sapiens |
| 4041   | low density lipoprotein receptor-related protein 5                                                                                                                                                                                                                                                                                                                                                                                                                             | Homo sapiens |
| 7109   | trafficking protein particle complex 10                                                                                                                                                                                                                                                                                                                                                                                                                                        | Homo sapiens |
| 9043   | sperm associated antigen 9                                                                                                                                                                                                                                                                                                                                                                                                                                                     | Homo sapiens |
| 23066  | cullin-associated and neddylation-dissociated 2 (putative)                                                                                                                                                                                                                                                                                                                                                                                                                     | Homo sapiens |
| 51520  | leucyl-tRNA synthetase                                                                                                                                                                                                                                                                                                                                                                                                                                                         | Homo sapiens |
| 57148  | KIAA1219                                                                                                                                                                                                                                                                                                                                                                                                                                                                       | Homo sapiens |
| 6741   | Sjogren syndrome antigen B (autoantigen La)                                                                                                                                                                                                                                                                                                                                                                                                                                    | Homo sapiens |
| 26259  | F-box and WD repeat domain containing 8                                                                                                                                                                                                                                                                                                                                                                                                                                        | Homo sapiens |
| 10216  | proteoglycan 4                                                                                                                                                                                                                                                                                                                                                                                                                                                                 | Homo sapiens |
| 308    | annexin A5                                                                                                                                                                                                                                                                                                                                                                                                                                                                     | Homo sapiens |
| 152007 | GLI pathogenesis-related 2                                                                                                                                                                                                                                                                                                                                                                                                                                                     | Homo sapiens |
| 439    | arsA arsenite transporter, ATP-binding, homolog 1 (bacterial)                                                                                                                                                                                                                                                                                                                                                                                                                  | Homo sapiens |
| 64746  | acyl-Coenzyme A binding domain containing 3                                                                                                                                                                                                                                                                                                                                                                                                                                    | Homo sapiens |
| 81876  | RAB1B, member RAS oncogene family                                                                                                                                                                                                                                                                                                                                                                                                                                              | Homo sapiens |
| 2932   | glycogen synthase kinase 3 beta                                                                                                                                                                                                                                                                                                                                                                                                                                                | Homo sapiens |
| 5635   | phosphoribosyl pyrophosphate synthetase-associated protein 1                                                                                                                                                                                                                                                                                                                                                                                                                   | Homo sapiens |
| 1278   | collagen, type I, alpha 2                                                                                                                                                                                                                                                                                                                                                                                                                                                      | Homo sapiens |
| 2873   | G protein pathway suppressor 1                                                                                                                                                                                                                                                                                                                                                                                                                                                 | Homo sapiens |
| 950    | scavenger receptor class B, member 2                                                                                                                                                                                                                                                                                                                                                                                                                                           | Homo sapiens |
| 338    | apolipoprotein B (including Ag(x) antigen)                                                                                                                                                                                                                                                                                                                                                                                                                                     | Homo sapiens |
| 10277  | ubiquitination factor E4B (UFD2 homolog, yeast)                                                                                                                                                                                                                                                                                                                                                                                                                                | Homo sapiens |
| 51382  | ATPase, H+ transporting, lysosomal 34kDa, V1 subunit D                                                                                                                                                                                                                                                                                                                                                                                                                         | Homo sapiens |
| 29978  | ubiquilin 2                                                                                                                                                                                                                                                                                                                                                                                                                                                                    | Homo sapiens |
| 351    | amyloid beta (A4) precursor protein                                                                                                                                                                                                                                                                                                                                                                                                                                            | Homo sapiens |
| 3925   | stathmin 1                                                                                                                                                                                                                                                                                                                                                                                                                                                                     | Homo sapiens |
| 58513  | epidermal growth factor receptor pathway substrate 15-like 1                                                                                                                                                                                                                                                                                                                                                                                                                   | Homo sapiens |
| 9522   | secretory carrier membrane protein 1                                                                                                                                                                                                                                                                                                                                                                                                                                           | Homo sapiens |
| 6597   | SWI/SNF related, matrix associated, actin dependent regulator of chromatin, subfamily a, member 4                                                                                                                                                                                                                                                                                                                                                                              | Homo sapiens |
| 3306   | heat shock 70kDa protein 2                                                                                                                                                                                                                                                                                                                                                                                                                                                     | Homo sapiens |
| 10054  | ubiquitin-like modifier activating enzyme 2                                                                                                                                                                                                                                                                                                                                                                                                                                    | Homo sapiens |
| 7779   | solute carrier family 30 (zinc transporter), member 1                                                                                                                                                                                                                                                                                                                                                                                                                          | Homo sapiens |
| 6917   | transcription elongation factor A (SII), 1 pseudogene 2; transcription elongation factor A (SII), 1                                                                                                                                                                                                                                                                                                                                                                            | Homo sapiens |
| 55100  | WD repeat domain 70                                                                                                                                                                                                                                                                                                                                                                                                                                                            | Homo sapiens |
| 9044   | BTAF1 RNA polymerase II, B-TFIID transcription factor-associated, 170kDa (Mot1 homolog, S. cerevisiae)                                                                                                                                                                                                                                                                                                                                                                         | Homo sapiens |
| 5902   | similar to RAN binding protein 1; RAN binding protein 1                                                                                                                                                                                                                                                                                                                                                                                                                        | Homo sapiens |
| 10526  | importin 8                                                                                                                                                                                                                                                                                                                                                                                                                                                                     | Homo sapiens |
| 57599  | WD repeat domain 48                                                                                                                                                                                                                                                                                                                                                                                                                                                            | Homo sapiens |
| 1477   | cleavage stimulation factor, 3' pre-RNA, subunit 1, 50kDa                                                                                                                                                                                                                                                                                                                                                                                                                      | Homo sapiens |
| 1267   | 2',3'-cyclic nucleotide 3' phosphodiesterase                                                                                                                                                                                                                                                                                                                                                                                                                                   | Homo sapiens |
| 7110   | TATA element modulatory factor 1                                                                                                                                                                                                                                                                                                                                                                                                                                               | Homo sapiens |
| 5654   | HtrA serine peptidase 1                                                                                                                                                                                                                                                                                                                                                                                                                                                        | Homo sapiens |
| 9353   | slit homolog 2 (Drosophila)                                                                                                                                                                                                                                                                                                                                                                                                                                                    | Homo sapiens |
| 7879   | RAB7A, member RAS oncogene family                                                                                                                                                                                                                                                                                                                                                                                                                                              | Homo sapiens |
| 3912   | laminin, beta 1                                                                                                                                                                                                                                                                                                                                                                                                                                                                | Homo sapiens |
| 8533   | COP9 constitutive photomorphogenic homolog subunit 3 (Arabidopsis)                                                                                                                                                                                                                                                                                                                                                                                                             | Homo sapiens |
| 4318   | matrix metalloproteinase 9 (gelatinase B, 92kDa gelatinase, 92kDa type IV collagenase)                                                                                                                                                                                                                                                                                                                                                                                         | Homo sapiens |
| 9775   | eukaryotic translation initiation factor 4A, isoform 3                                                                                                                                                                                                                                                                                                                                                                                                                         | Homo sapiens |
| 81624  | diaphanous homolog 3 (Drosophila)                                                                                                                                                                                                                                                                                                                                                                                                                                              | Homo sapiens |
| 5708   | proteasome (prosome, macropain) 26S subunit, non-ATPase, 2                                                                                                                                                                                                                                                                                                                                                                                                                     | Homo sapiens |
| 161424 | chromosome 14 open reading frame 21                                                                                                                                                                                                                                                                                                                                                                                                                                            | Homo sapiens |
| 23011  | RAB21, member RAS oncogene family                                                                                                                                                                                                                                                                                                                                                                                                                                              | Homo sapiens |
| 6231   | ribosomal protein S26 pseudogene 38; ribosomal protein S26 pseudogene 39; ribosomal protein S26 pseudogene 35; ribosomal protein S26 pseudogene 31; ribosomal protein S26 pseudogene 20; ribosomal protein S26 pseudogene 54; ribosomal protein S26 pseudogene 2; ribosomal protein S26 pseudogene 53; ribosomal protein S26 pseudogene 25; ribosomal protein S26 pseudogene 50; ribosomal protein S26 pseudogene 6; ribosomal protein S26 pseudogene 8; ribosomal protein S26 | Homo sapiens |
| 4144   | methionine adenosyltransferase II, alpha                                                                                                                                                                                                                                                                                                                                                                                                                                       | Homo sapiens |
| 54512  | exosome component 4                                                                                                                                                                                                                                                                                                                                                                                                                                                            | Homo sapiens |
| 5899   | v-ral simian leukemia viral oncogene homolog B (ras related; GTP binding protein)                                                                                                                                                                                                                                                                                                                                                                                              | Homo sapiens |
| 79876  | ubiquitin-like modifier activating enzyme 5                                                                                                                                                                                                                                                                                                                                                                                                                                    | Homo sapiens |
| 55250  | elongation protein 2 homolog (S. cerevisiae)                                                                                                                                                                                                                                                                                                                                                                                                                                   | Homo sapiens |
| 8518   | inhibitor of kappa light polypeptide gene enhancer in B-cells, kinase complex-associated protein                                                                                                                                                                                                                                                                                                                                                                               | Homo sapiens |
| 51162  | EGF-like-domain, multiple 7                                                                                                                                                                                                                                                                                                                                                                                                                                                    | Homo sapiens |
| 6605   | SWI/SNF related, matrix associated, actin dependent regulator of chromatin, subfamily e, member 1                                                                                                                                                                                                                                                                                                                                                                              | Homo sapiens |
| 58517  | RNA binding motif protein 25                                                                                                                                                                                                                                                                                                                                                                                                                                                   | Homo sapiens |
| 5255   | phosphorylase kinase, alpha 1 pseudogene 1; phosphorylase kinase, alpha 1 (muscle)                                                                                                                                                                                                                                                                                                                                                                                             | Homo sapiens |
| 2519   | fucosidase, alpha-L- 2, plasma                                                                                                                                                                                                                                                                                                                                                                                                                                                 | Homo sapiens |
| 29926  | GDP-mannose pyrophosphorylase A                                                                                                                                                                                                                                                                                                                                                                                                                                                | Homo sapiens |
| 5910   | RAP1, GTP-GDP dissociation stimulator 1                                                                                                                                                                                                                                                                                                                                                                                                                                        | Homo sapiens |
| 79718  | transducin (beta)-like 1 X-linked receptor 1                                                                                                                                                                                                                                                                                                                                                                                                                                   | Homo sapiens |
| 7917   | HLA-B associated transcript 3                                                                                                                                                                                                                                                                                                                                                                                                                                                  | Homo sapiens |
| 4650   | myosin IXB                                                                                                                                                                                                                                                                                                                                                                                                                                                                     | Homo sapiens |



|        |                                                                                                                                                                                                                                                                                                                                                                                                                                                                                                                                                                                                                                                                                                                                                                                                                                                                                                                 |              |
|--------|-----------------------------------------------------------------------------------------------------------------------------------------------------------------------------------------------------------------------------------------------------------------------------------------------------------------------------------------------------------------------------------------------------------------------------------------------------------------------------------------------------------------------------------------------------------------------------------------------------------------------------------------------------------------------------------------------------------------------------------------------------------------------------------------------------------------------------------------------------------------------------------------------------------------|--------------|
| 5576   | protein kinase, cAMP-dependent, regulatory, type II, alpha                                                                                                                                                                                                                                                                                                                                                                                                                                                                                                                                                                                                                                                                                                                                                                                                                                                      | Homo sapiens |
| 708    | complement component 1, q subcomponent binding protein                                                                                                                                                                                                                                                                                                                                                                                                                                                                                                                                                                                                                                                                                                                                                                                                                                                          | Homo sapiens |
| 24137  | kinesin family member 4B; kinesin family member 4A                                                                                                                                                                                                                                                                                                                                                                                                                                                                                                                                                                                                                                                                                                                                                                                                                                                              | Homo sapiens |
| 3069   | high density lipoprotein binding protein                                                                                                                                                                                                                                                                                                                                                                                                                                                                                                                                                                                                                                                                                                                                                                                                                                                                        | Homo sapiens |
| 25839  | component of oligomeric golgi complex 4                                                                                                                                                                                                                                                                                                                                                                                                                                                                                                                                                                                                                                                                                                                                                                                                                                                                         | Homo sapiens |
| 10450  | peptidylprolyl isomerase E (cyclophilin E)                                                                                                                                                                                                                                                                                                                                                                                                                                                                                                                                                                                                                                                                                                                                                                                                                                                                      | Homo sapiens |
| 10067  | secretory carrier membrane protein 3                                                                                                                                                                                                                                                                                                                                                                                                                                                                                                                                                                                                                                                                                                                                                                                                                                                                            | Homo sapiens |
| 6434   | transformer 2 beta homolog (Drosophila)                                                                                                                                                                                                                                                                                                                                                                                                                                                                                                                                                                                                                                                                                                                                                                                                                                                                         | Homo sapiens |
| 4131   | microtubule-associated protein 1B                                                                                                                                                                                                                                                                                                                                                                                                                                                                                                                                                                                                                                                                                                                                                                                                                                                                               | Homo sapiens |
| 1453   | casein kinase 1, delta                                                                                                                                                                                                                                                                                                                                                                                                                                                                                                                                                                                                                                                                                                                                                                                                                                                                                          | Homo sapiens |
| 11078  | TRIO and F-actin binding protein                                                                                                                                                                                                                                                                                                                                                                                                                                                                                                                                                                                                                                                                                                                                                                                                                                                                                | Homo sapiens |
| 1778   | dynein, cytoplasmic 1, heavy chain 1                                                                                                                                                                                                                                                                                                                                                                                                                                                                                                                                                                                                                                                                                                                                                                                                                                                                            | Homo sapiens |
| 9343   | elongation factor Tu GTP binding domain containing 2                                                                                                                                                                                                                                                                                                                                                                                                                                                                                                                                                                                                                                                                                                                                                                                                                                                            | Homo sapiens |
| 996    | cell division cycle 27 homolog (S. cerevisiae)                                                                                                                                                                                                                                                                                                                                                                                                                                                                                                                                                                                                                                                                                                                                                                                                                                                                  | Homo sapiens |
| 10059  | dynamin 1-like                                                                                                                                                                                                                                                                                                                                                                                                                                                                                                                                                                                                                                                                                                                                                                                                                                                                                                  | Homo sapiens |
| 169714 | quiescin Q6 sulfhydryl oxidase 2                                                                                                                                                                                                                                                                                                                                                                                                                                                                                                                                                                                                                                                                                                                                                                                                                                                                                | Homo sapiens |
| 1938   | eukaryotic translation elongation factor 2                                                                                                                                                                                                                                                                                                                                                                                                                                                                                                                                                                                                                                                                                                                                                                                                                                                                      | Homo sapiens |
| 9844   | engulfment and cell motility 1                                                                                                                                                                                                                                                                                                                                                                                                                                                                                                                                                                                                                                                                                                                                                                                                                                                                                  | Homo sapiens |
| 6733   | SFRS protein kinase 2                                                                                                                                                                                                                                                                                                                                                                                                                                                                                                                                                                                                                                                                                                                                                                                                                                                                                           | Homo sapiens |
| 27095  | trafficking protein particle complex 3                                                                                                                                                                                                                                                                                                                                                                                                                                                                                                                                                                                                                                                                                                                                                                                                                                                                          | Homo sapiens |
| 6515   | solute carrier family 2 (facilitated glucose transporter), member 3                                                                                                                                                                                                                                                                                                                                                                                                                                                                                                                                                                                                                                                                                                                                                                                                                                             | Homo sapiens |
| 6541   | solute carrier family 7 (cationic amino acid transporter, y+ system), member 1                                                                                                                                                                                                                                                                                                                                                                                                                                                                                                                                                                                                                                                                                                                                                                                                                                  | Homo sapiens |
| 3840   | karyopherin alpha 4 (importin alpha 3)                                                                                                                                                                                                                                                                                                                                                                                                                                                                                                                                                                                                                                                                                                                                                                                                                                                                          | Homo sapiens |
| 23435  | TAR DNA binding protein                                                                                                                                                                                                                                                                                                                                                                                                                                                                                                                                                                                                                                                                                                                                                                                                                                                                                         | Homo sapiens |
| 51434  | anaphase promoting complex subunit 7                                                                                                                                                                                                                                                                                                                                                                                                                                                                                                                                                                                                                                                                                                                                                                                                                                                                            | Homo sapiens |
| 27131  | sorting nexin 5                                                                                                                                                                                                                                                                                                                                                                                                                                                                                                                                                                                                                                                                                                                                                                                                                                                                                                 | Homo sapiens |
| 63929  | X-prolyl aminopeptidase (aminopeptidase P) 3, putative                                                                                                                                                                                                                                                                                                                                                                                                                                                                                                                                                                                                                                                                                                                                                                                                                                                          | Homo sapiens |
| 3074   | hexosaminidase B (beta polypeptide)                                                                                                                                                                                                                                                                                                                                                                                                                                                                                                                                                                                                                                                                                                                                                                                                                                                                             | Homo sapiens |
| 5352   | procollagen-lysine, 2-oxoglutarate 5-dioxygenase 2                                                                                                                                                                                                                                                                                                                                                                                                                                                                                                                                                                                                                                                                                                                                                                                                                                                              | Homo sapiens |
| 4012   | leucyl/cystinyl aminopeptidase                                                                                                                                                                                                                                                                                                                                                                                                                                                                                                                                                                                                                                                                                                                                                                                                                                                                                  | Homo sapiens |
| 3735   | lysyl-tRNA synthetase                                                                                                                                                                                                                                                                                                                                                                                                                                                                                                                                                                                                                                                                                                                                                                                                                                                                                           | Homo sapiens |
| 3609   | interleukin enhancer binding factor 3, 90kDa                                                                                                                                                                                                                                                                                                                                                                                                                                                                                                                                                                                                                                                                                                                                                                                                                                                                    | Homo sapiens |
| 5208   | 6-phosphofructo-2-kinase/fructose-2,6-biphosphatase 2                                                                                                                                                                                                                                                                                                                                                                                                                                                                                                                                                                                                                                                                                                                                                                                                                                                           | Homo sapiens |
| 387    | ras homolog gene family, member A                                                                                                                                                                                                                                                                                                                                                                                                                                                                                                                                                                                                                                                                                                                                                                                                                                                                               | Homo sapiens |
| 160    | adaptor-related protein complex 2, alpha 1 subunit                                                                                                                                                                                                                                                                                                                                                                                                                                                                                                                                                                                                                                                                                                                                                                                                                                                              | Homo sapiens |
| 4841   | non-POU domain containing, octamer-binding                                                                                                                                                                                                                                                                                                                                                                                                                                                                                                                                                                                                                                                                                                                                                                                                                                                                      | Homo sapiens |
| 29082  | chromatin modifying protein 4A                                                                                                                                                                                                                                                                                                                                                                                                                                                                                                                                                                                                                                                                                                                                                                                                                                                                                  | Homo sapiens |
| 5430   | polymerase (RNA) II (DNA directed) polypeptide A, 220kDa                                                                                                                                                                                                                                                                                                                                                                                                                                                                                                                                                                                                                                                                                                                                                                                                                                                        | Homo sapiens |
| 79987  | sushi, von Willebrand factor type A, EGF and pentraxin domain containing 1                                                                                                                                                                                                                                                                                                                                                                                                                                                                                                                                                                                                                                                                                                                                                                                                                                      | Homo sapiens |
| 5202   | prefoldin subunit 2                                                                                                                                                                                                                                                                                                                                                                                                                                                                                                                                                                                                                                                                                                                                                                                                                                                                                             | Homo sapiens |
| 79861  | tubulin, alpha-like 3                                                                                                                                                                                                                                                                                                                                                                                                                                                                                                                                                                                                                                                                                                                                                                                                                                                                                           | Homo sapiens |
| 2091   | fibrillarin                                                                                                                                                                                                                                                                                                                                                                                                                                                                                                                                                                                                                                                                                                                                                                                                                                                                                                     | Homo sapiens |
| 4054   | latent transforming growth factor beta binding protein 3                                                                                                                                                                                                                                                                                                                                                                                                                                                                                                                                                                                                                                                                                                                                                                                                                                                        | Homo sapiens |
| 9208   | leucine rich repeat (in FLII) interacting protein 1                                                                                                                                                                                                                                                                                                                                                                                                                                                                                                                                                                                                                                                                                                                                                                                                                                                             | Homo sapiens |
| 81611  | acidic (leucine-rich) nuclear phosphoprotein 32 family, member E                                                                                                                                                                                                                                                                                                                                                                                                                                                                                                                                                                                                                                                                                                                                                                                                                                                | Homo sapiens |
| 203    | adenylate kinase 1                                                                                                                                                                                                                                                                                                                                                                                                                                                                                                                                                                                                                                                                                                                                                                                                                                                                                              | Homo sapiens |
| 85440  | dedicator of cytokinesis 7                                                                                                                                                                                                                                                                                                                                                                                                                                                                                                                                                                                                                                                                                                                                                                                                                                                                                      | Homo sapiens |
| 6168   | ribosomal protein L37a                                                                                                                                                                                                                                                                                                                                                                                                                                                                                                                                                                                                                                                                                                                                                                                                                                                                                          | Homo sapiens |
| 5870   | RAB6C, member RAS oncogene family; RAB6A, member RAS oncogene family; hypothetical LOC100130819; RAB6C-like                                                                                                                                                                                                                                                                                                                                                                                                                                                                                                                                                                                                                                                                                                                                                                                                     | Homo sapiens |
| 150786 | RAB6C, member RAS oncogene family; RAB6A, member RAS oncogene family; hypothetical LOC100130819; RAB6C-like                                                                                                                                                                                                                                                                                                                                                                                                                                                                                                                                                                                                                                                                                                                                                                                                     | Homo sapiens |
| 84084  | RAB6C, member RAS oncogene family; RAB6A, member RAS oncogene family; hypothetical LOC100130819; RAB6C-like                                                                                                                                                                                                                                                                                                                                                                                                                                                                                                                                                                                                                                                                                                                                                                                                     | Homo sapiens |
| 135293 | peptidase M20 domain containing 2                                                                                                                                                                                                                                                                                                                                                                                                                                                                                                                                                                                                                                                                                                                                                                                                                                                                               | Homo sapiens |
| 5519   | protein phosphatase 2 (formerly 2A), regulatory subunit A, beta isoform                                                                                                                                                                                                                                                                                                                                                                                                                                                                                                                                                                                                                                                                                                                                                                                                                                         | Homo sapiens |
| 6144   | ribosomal protein L21 pseudogene 134; ribosomal protein L21 pseudogene 80; ribosomal protein L21 pseudogene 20; ribosomal protein L21 pseudogene 46; ribosomal protein L21 pseudogene 45; ribosomal protein L21 pseudogene 131; ribosomal protein L21 pseudogene 16; ribosomal protein L21 pseudogene 53; ribosomal protein L21 pseudogene 120; ribosomal protein L21 pseudogene 37; ribosomal protein L21 pseudogene 93; ribosomal protein L21 pseudogene 39; ribosomal protein L21 pseudogene 29; ribosomal protein L21 pseudogene 28; ribosomal protein L21 pseudogene 14; ribosomal protein L21 pseudogene 98; ribosomal protein L21 pseudogene 105; ribosomal protein L21 pseudogene 87; ribosomal protein L21 pseudogene 128; ribosomal protein L21 pseudogene 69; ribosomal protein L21 pseudogene 97; ribosomal protein L21; ribosomal protein L21 pseudogene 119; ribosomal protein L21 pseudogene 125 | Homo sapiens |
| 56920  | sema domain, immunoglobulin domain (Ig), short basic domain, secreted, (semaphorin) 3G                                                                                                                                                                                                                                                                                                                                                                                                                                                                                                                                                                                                                                                                                                                                                                                                                          | Homo sapiens |
| 204    | adenylate kinase 2                                                                                                                                                                                                                                                                                                                                                                                                                                                                                                                                                                                                                                                                                                                                                                                                                                                                                              | Homo sapiens |
| 6237   | related RAS viral (r-ras) oncogene homolog                                                                                                                                                                                                                                                                                                                                                                                                                                                                                                                                                                                                                                                                                                                                                                                                                                                                      | Homo sapiens |
| 11171  | serine/threonine kinase receptor associated protein                                                                                                                                                                                                                                                                                                                                                                                                                                                                                                                                                                                                                                                                                                                                                                                                                                                             | Homo sapiens |
| 56915  | exosome component 5                                                                                                                                                                                                                                                                                                                                                                                                                                                                                                                                                                                                                                                                                                                                                                                                                                                                                             | Homo sapiens |
| 3998   | lectin, mannose-binding, 1                                                                                                                                                                                                                                                                                                                                                                                                                                                                                                                                                                                                                                                                                                                                                                                                                                                                                      | Homo sapiens |
| 23170  | tubulin tyrosine ligase-like family, member 12                                                                                                                                                                                                                                                                                                                                                                                                                                                                                                                                                                                                                                                                                                                                                                                                                                                                  | Homo sapiens |
| 10550  | ADP-ribosylation-like factor 6 interacting protein 5                                                                                                                                                                                                                                                                                                                                                                                                                                                                                                                                                                                                                                                                                                                                                                                                                                                            | Homo sapiens |
| 1373   | carbamoyl-phosphate synthetase 1, mitochondrial                                                                                                                                                                                                                                                                                                                                                                                                                                                                                                                                                                                                                                                                                                                                                                                                                                                                 | Homo sapiens |
| 10313  | reticulin 3                                                                                                                                                                                                                                                                                                                                                                                                                                                                                                                                                                                                                                                                                                                                                                                                                                                                                                     | Homo sapiens |
| 2746   | glutamate dehydrogenase 1                                                                                                                                                                                                                                                                                                                                                                                                                                                                                                                                                                                                                                                                                                                                                                                                                                                                                       | Homo sapiens |
| 51699  | vacuolar protein sorting 29 homolog (S. cerevisiae)                                                                                                                                                                                                                                                                                                                                                                                                                                                                                                                                                                                                                                                                                                                                                                                                                                                             | Homo sapiens |
| 9439   | mediator complex subunit 23                                                                                                                                                                                                                                                                                                                                                                                                                                                                                                                                                                                                                                                                                                                                                                                                                                                                                     | Homo sapiens |
| 7431   | vimentin                                                                                                                                                                                                                                                                                                                                                                                                                                                                                                                                                                                                                                                                                                                                                                                                                                                                                                        | Homo sapiens |
| 23451  | splicing factor 3b, subunit 1, 155kDa                                                                                                                                                                                                                                                                                                                                                                                                                                                                                                                                                                                                                                                                                                                                                                                                                                                                           | Homo sapiens |
| 23246  | block of proliferation 1                                                                                                                                                                                                                                                                                                                                                                                                                                                                                                                                                                                                                                                                                                                                                                                                                                                                                        | Homo sapiens |
| 6197   | ribosomal protein S6 kinase, 90kDa, polypeptide 3                                                                                                                                                                                                                                                                                                                                                                                                                                                                                                                                                                                                                                                                                                                                                                                                                                                               | Homo sapiens |
| 3188   | ribosomal protein L36a pseudogene 51; ribosomal protein L36a pseudogene 37; ribosomal protein L36a pseudogene 49; heterogeneous nuclear ribonucleoprotein H2 (H <sup>2</sup> ); ribosomal protein L36a                                                                                                                                                                                                                                                                                                                                                                                                                                                                                                                                                                                                                                                                                                          | Homo sapiens |
| 7812   | cold shock domain containing E1, RNA-binding                                                                                                                                                                                                                                                                                                                                                                                                                                                                                                                                                                                                                                                                                                                                                                                                                                                                    | Homo sapiens |

|        |                                                                                                                                                                               |              |
|--------|-------------------------------------------------------------------------------------------------------------------------------------------------------------------------------|--------------|
| 84313  | vacuolar protein sorting 25 homolog ( <i>S. cerevisiae</i> )                                                                                                                  | Homo sapiens |
| 10801  | septin 9                                                                                                                                                                      | Homo sapiens |
| 6723   | spermidine synthase                                                                                                                                                           | Homo sapiens |
| 6449   | small glutamine-rich tetratricopeptide repeat (TPR)-containing, alpha                                                                                                         | Homo sapiens |
| 9126   | structural maintenance of chromosomes 3                                                                                                                                       | Homo sapiens |
| 9810   | ring finger protein 40                                                                                                                                                        | Homo sapiens |
| 977    | CD151 molecule (Raph blood group)                                                                                                                                             | Homo sapiens |
| 8825   | lin-7 homolog A ( <i>C. elegans</i> )                                                                                                                                         | Homo sapiens |
| 2193   | phenylalanyl-tRNA synthetase, alpha subunit                                                                                                                                   | Homo sapiens |
| 9675   | KIAA0406                                                                                                                                                                      | Homo sapiens |
| 9510   | ADAM metallopeptidase with thrombospondin type 1 motif, 1                                                                                                                     | Homo sapiens |
| 5691   | proteasome (prosome, macropain) subunit, beta type, 3                                                                                                                         | Homo sapiens |
| 129531 | MIT, microtubule interacting and transport, domain containing 1                                                                                                               | Homo sapiens |
| 79631  | elongation factor Tu GTP binding domain containing 1                                                                                                                          | Homo sapiens |
| 9040   | ubiquitin-conjugating enzyme E2M (UBC12 homolog, yeast); ubiquitin-conjugating enzyme E2M pseudogene 1                                                                        | Homo sapiens |
| 201292 | tripartite motif-containing 65                                                                                                                                                | Homo sapiens |
| 151011 | septin 10                                                                                                                                                                     | Homo sapiens |
| 3693   | integrin, beta 5                                                                                                                                                              | Homo sapiens |
| 7042   | transforming growth factor, beta 2                                                                                                                                            | Homo sapiens |
| 10627  | myosin, light chain 12A, regulatory, non-sarcomeric                                                                                                                           | Homo sapiens |
| 55269  | paraspeckle component 1; paraspeckle protein 1 pseudogene                                                                                                                     | Homo sapiens |
| 2060   | epidermal growth factor receptor pathway substrate 15                                                                                                                         | Homo sapiens |
| 22803  | 5'-3' exoribonuclease 2                                                                                                                                                       | Homo sapiens |
| 29109  | formin homology 2 domain containing 1                                                                                                                                         | Homo sapiens |
| 60412  | exocyst complex component 4                                                                                                                                                   | Homo sapiens |
| 9375   | transmembrane 9 superfamily member 2                                                                                                                                          | Homo sapiens |
| 7094   | talin 1                                                                                                                                                                       | Homo sapiens |
| 55324  | ATP-binding cassette, sub-family F (GCN20), member 3                                                                                                                          | Homo sapiens |
| 8567   | MAP-kinase activating death domain                                                                                                                                            | Homo sapiens |
| 5796   | protein tyrosine phosphatase, receptor type, K                                                                                                                                | Homo sapiens |
| 145864 | hyaluronan and proteoglycan link protein 3                                                                                                                                    | Homo sapiens |
| 55207  | ADP-ribosylation factor-like 8B                                                                                                                                               | Homo sapiens |
| 88455  | ankyrin repeat domain 13A                                                                                                                                                     | Homo sapiens |
| 51072  | mediator of cell motility 1; similar to mediator of cell motility 1                                                                                                           | Homo sapiens |
| 55275  | vacuolar protein sorting 53 homolog ( <i>S. cerevisiae</i> )                                                                                                                  | Homo sapiens |
| 9318   | COP9 constitutive photomorphogenic homolog subunit 2 ( <i>Arabidopsis</i> )                                                                                                   | Homo sapiens |
| 1200   | tripeptidyl peptidase 1                                                                                                                                                       | Homo sapiens |
| 1460   | lymphocyte antigen 6 complex, locus G5B; casein kinase 2, beta polypeptide                                                                                                    | Homo sapiens |
| 53918  | pelota homolog ( <i>Drosophila</i> )                                                                                                                                          | Homo sapiens |
| 7251   | tumor susceptibility gene 101                                                                                                                                                 | Homo sapiens |
| 3800   | kinesin family member 5C                                                                                                                                                      | Homo sapiens |
| 84955  | NudC domain containing 1                                                                                                                                                      | Homo sapiens |
| 9382   | component of oligomeric golgi complex 1                                                                                                                                       | Homo sapiens |
| 23545  | ATPase, H+ transporting, lysosomal V0 subunit a2                                                                                                                              | Homo sapiens |
| 55754  | transmembrane protein 30A                                                                                                                                                     | Homo sapiens |
| 11103  | KRR1, small subunit (SSU) processome component, homolog (yeast)                                                                                                               | Homo sapiens |
| 5046   | proprotein convertase subtilisin/kexin type 6                                                                                                                                 | Homo sapiens |
| 10360  | nucleophosmin/nucleoplasmin, 3                                                                                                                                                | Homo sapiens |
| 23446  | solute carrier family 44, member 1                                                                                                                                            | Homo sapiens |
| 8467   | SWI/SNF related, matrix associated, actin dependent regulator of chromatin, subfamily a, member 5                                                                             | Homo sapiens |
| 5832   | aldehyde dehydrogenase 18 family, member A1                                                                                                                                   | Homo sapiens |
| 2584   | galactokinase 1                                                                                                                                                               | Homo sapiens |
| 9532   | BCL2-associated athanogene 2                                                                                                                                                  | Homo sapiens |
| 5869   | RAB5B, member RAS oncogene family                                                                                                                                             | Homo sapiens |
| 4241   | antigen p97 (melanoma associated) identified by monoclonal antibodies 133.2 and 96.5                                                                                          | Homo sapiens |
| 6627   | small nuclear ribonucleoprotein polypeptide A'                                                                                                                                | Homo sapiens |
| 3039   | hemoglobin, alpha 2; hemoglobin, alpha 1                                                                                                                                      | Homo sapiens |
| 3040   | hemoglobin, alpha 2; hemoglobin, alpha 1                                                                                                                                      | Homo sapiens |
| 7407   | valyl-tRNA synthetase                                                                                                                                                         | Homo sapiens |
| 5478   | similar to TRIMCyp; peptidylprolyl isomerase A (cyclophilin A); peptidylprolyl isomerase A (cyclophilin A)-like 3                                                             | Homo sapiens |
| 653214 | similar to TRIMCyp; peptidylprolyl isomerase A (cyclophilin A); peptidylprolyl isomerase A (cyclophilin A)-like 3                                                             | Homo sapiens |
| 439953 | similar to TRIMCyp; peptidylprolyl isomerase A (cyclophilin A); peptidylprolyl isomerase A (cyclophilin A)-like 3                                                             | Homo sapiens |
| 7841   | mannosyl-oligosaccharide glucosidase                                                                                                                                          | Homo sapiens |
| 51497  | TH1-like ( <i>Drosophila</i> )                                                                                                                                                | Homo sapiens |
| 3105   | major histocompatibility complex, class I, A                                                                                                                                  | Homo sapiens |
| 5567   | protein kinase, cAMP-dependent, catalytic, beta                                                                                                                               | Homo sapiens |
| 56949  | XPA binding protein 2                                                                                                                                                         | Homo sapiens |
| 875    | cystathionine-beta-synthase                                                                                                                                                   | Homo sapiens |
| 9777   | transmembrane 9 superfamily protein member 4                                                                                                                                  | Homo sapiens |
| 2237   | flap structure-specific endonuclease 1                                                                                                                                        | Homo sapiens |
| 4677   | asparaginyl-tRNA synthetase                                                                                                                                                   | Homo sapiens |
| 8881   | cell division cycle 16 homolog ( <i>S. cerevisiae</i> )                                                                                                                       | Homo sapiens |
| 51727  | cytidine monophosphate (UMP-CMP) kinase 1, cytosolic                                                                                                                          | Homo sapiens |
| 6093   | similar to Rho-associated, coiled-coil containing protein kinase 1; Rho-associated, coiled-coil containing protein kinase 1                                                   | Homo sapiens |
| 4141   | methionyl-tRNA synthetase                                                                                                                                                     | Homo sapiens |
| 1743   | dihydrolipoamide S-succinyltransferase (E2 component of 2-oxo-glutarate complex); dihydrolipoamide S-succinyltransferase pseudogene (E2 component of 2-oxo-glutarate complex) | Homo sapiens |
| 6203   | ribosomal protein S9; ribosomal protein S9 pseudogene 4                                                                                                                       | Homo sapiens |
| 6470   | serine hydroxymethyltransferase 1 (soluble)                                                                                                                                   | Homo sapiens |

|           |                                                                                                                                                                                                                                                                                                   |              |
|-----------|---------------------------------------------------------------------------------------------------------------------------------------------------------------------------------------------------------------------------------------------------------------------------------------------------|--------------|
| 3178      | heterogeneous nuclear ribonucleoprotein A1-like 3; similar to heterogeneous nuclear ribonucleoprotein A1; heterogeneous nuclear ribonucleoprotein A1 pseudogene 2; heterogeneous nuclear ribonucleoprotein A1; heterogeneous nuclear ribonucleoprotein A1 pseudogene                              | Homo sapiens |
| 1861      | torsin family 1, member A (torsin A)                                                                                                                                                                                                                                                              | Homo sapiens |
| 5880      | ras-related C3 botulinum toxin substrate 2 (rho family, small GTP binding protein Rac2)                                                                                                                                                                                                           | Homo sapiens |
| 5813      | purine-rich element binding protein A                                                                                                                                                                                                                                                             | Homo sapiens |
| 1841      | deoxythymidylate kinase (thymidylate kinase); similar to Deoxythymidylate kinase (thymidylate kinase)                                                                                                                                                                                             | Homo sapiens |
| 388698    | filaggrin family member 2                                                                                                                                                                                                                                                                         | Homo sapiens |
| 55745     | MU-2/APIM2 domain containing, death-inducing                                                                                                                                                                                                                                                      | Homo sapiens |
| 3845      | v-Ki-ras2 Kirsten rat sarcoma viral oncogene homolog                                                                                                                                                                                                                                              | Homo sapiens |
| 1272      | contactin 1                                                                                                                                                                                                                                                                                       | Homo sapiens |
| 22883     | calsyntenin 1                                                                                                                                                                                                                                                                                     | Homo sapiens |
| 4763      | neurofibromin 1                                                                                                                                                                                                                                                                                   | Homo sapiens |
| 57521     | regulatory associated protein of MTOR, complex 1                                                                                                                                                                                                                                                  | Homo sapiens |
| 10768     | adenosylhomocysteinase-like 1                                                                                                                                                                                                                                                                     | Homo sapiens |
| 23657     | solute carrier family 7, (cationic amino acid transporter, y+ system) member 11                                                                                                                                                                                                                   | Homo sapiens |
| 9939      | RNA binding motif protein 8A                                                                                                                                                                                                                                                                      | Homo sapiens |
| 10953     | translocase of outer mitochondrial membrane 34                                                                                                                                                                                                                                                    | Homo sapiens |
| 643358    | ribosomal protein S27a pseudogene 12; ribosomal protein S27a; ribosomal protein S27a pseudogene 11; ribosomal protein S27a pseudogene 16                                                                                                                                                          | Homo sapiens |
| 6233      | ribosomal protein S27a pseudogene 12; ribosomal protein S27a; ribosomal protein S27a pseudogene 11; ribosomal protein S27a pseudogene 16                                                                                                                                                          | Homo sapiens |
| 728590    | ribosomal protein S27a pseudogene 12; ribosomal protein S27a; ribosomal protein S27a pseudogene 11; ribosomal protein S27a pseudogene 16                                                                                                                                                          | Homo sapiens |
| 100130446 | ribosomal protein S27a pseudogene 12; ribosomal protein S27a; ribosomal protein S27a pseudogene 11; ribosomal protein S27a pseudogene 16                                                                                                                                                          | Homo sapiens |
| 55501     | carbohydrate (chondroitin 4) sulfotransferase 12                                                                                                                                                                                                                                                  | Homo sapiens |
| 718       | similar to Complement C3 precursor; complement component 3; hypothetical protein LOC100133511                                                                                                                                                                                                     | Homo sapiens |
| 16        | alanyl-tRNA synthetase                                                                                                                                                                                                                                                                            | Homo sapiens |
| 9689      | basic leucine zipper and W2 domains 1 pseudogene 1; basic leucine zipper and W2 domains 1 like 1; basic leucine zipper and W2 domains 1                                                                                                                                                           | Homo sapiens |
| 9716      | aquarius homolog (mouse)                                                                                                                                                                                                                                                                          | Homo sapiens |
| 7514      | exportin 1 (CRM1 homolog, yeast)                                                                                                                                                                                                                                                                  | Homo sapiens |
| 8295      | transformation/transcription domain-associated protein                                                                                                                                                                                                                                            | Homo sapiens |
| 2199      | fibulin 2                                                                                                                                                                                                                                                                                         | Homo sapiens |
| 7060      | thrombospondin 4                                                                                                                                                                                                                                                                                  | Homo sapiens |
| 3192      | heterogeneous nuclear ribonucleoprotein U (scaffold attachment factor A)                                                                                                                                                                                                                          | Homo sapiens |
| 10298     | p21 protein (Cdc42/Rac)-activated kinase 4                                                                                                                                                                                                                                                        | Homo sapiens |
| 153364    | metallo-beta-lactamase domain containing 2                                                                                                                                                                                                                                                        | Homo sapiens |
| 1786      | DNA (cytosine-5)-methyltransferase 1                                                                                                                                                                                                                                                              | Homo sapiens |
| 55140     | elongation protein 3 homolog (S. cerevisiae)                                                                                                                                                                                                                                                      | Homo sapiens |
| 11052     | cleavage and polyadenylation specific factor 6, 68kDa                                                                                                                                                                                                                                             | Homo sapiens |
| 291       | solute carrier family 25 (mitochondrial carrier; adenine nucleotide translocator), member 4                                                                                                                                                                                                       | Homo sapiens |
| 2202      | EGF-containing fibulin-like extracellular matrix protein 1                                                                                                                                                                                                                                        | Homo sapiens |
| 170506    | DEAH (Asp-Glu-Ala-His) box polypeptide 36                                                                                                                                                                                                                                                         | Homo sapiens |
| 8615      | USO1 homolog, vesicle docking protein (yeast)                                                                                                                                                                                                                                                     | Homo sapiens |
| 2547      | X-ray repair complementing defective repair in Chinese hamster cells 6; similar to ATP-dependent DNA helicase II, 70 kDa subunit                                                                                                                                                                  | Homo sapiens |
| 10856     | RuvB-like 2 (E. coli)                                                                                                                                                                                                                                                                             | Homo sapiens |
| 1108      | chromodomain helicase DNA binding protein 4                                                                                                                                                                                                                                                       | Homo sapiens |
| 3081      | homogentisate 1,2-dioxygenase (homogentisate oxidase)                                                                                                                                                                                                                                             | Homo sapiens |
| 6625      | small nuclear ribonucleoprotein 70kDa (U1)                                                                                                                                                                                                                                                        | Homo sapiens |
| 1508      | cathepsin B                                                                                                                                                                                                                                                                                       | Homo sapiens |
| 84904     | chromosome 9 open reading frame 100                                                                                                                                                                                                                                                               | Homo sapiens |
| 252839    | transmembrane protein 9                                                                                                                                                                                                                                                                           | Homo sapiens |
| 10632     | ATP synthase, H+ transporting, mitochondrial F0 complex, subunit G                                                                                                                                                                                                                                | Homo sapiens |
| 59338     | pleckstrin homology domain containing, family A (phosphoinositide binding specific) member 1                                                                                                                                                                                                      | Homo sapiens |
| 1191      | clusterin                                                                                                                                                                                                                                                                                         | Homo sapiens |
| 25940     | family with sequence similarity 98, member A                                                                                                                                                                                                                                                      | Homo sapiens |
| 4507      | methylthioadenosine phosphorylase                                                                                                                                                                                                                                                                 | Homo sapiens |
| 310       | annexin A7                                                                                                                                                                                                                                                                                        | Homo sapiens |
| 6224      | ribosomal protein S20                                                                                                                                                                                                                                                                             | Homo sapiens |
| 8480      | RAE1 RNA export 1 homolog (S. pombe)                                                                                                                                                                                                                                                              | Homo sapiens |
| 3492      | immunoglobulin heavy constant gamma 1 (G1m marker); immunoglobulin heavy constant mu; immunoglobulin heavy variable 3-7; immunoglobulin heavy constant gamma 3 (G3m marker); immunoglobulin heavy variable 3-11 (gene/pseudogene); immunoglobulin heavy variable 4-31; immunoglobulin heavy locus | Homo sapiens |
| 28452     | immunoglobulin heavy constant gamma 1 (G1m marker); immunoglobulin heavy constant mu; immunoglobulin heavy variable 3-7; immunoglobulin heavy constant gamma 3 (G3m marker); immunoglobulin heavy variable 3-11 (gene/pseudogene); immunoglobulin heavy variable 4-31; immunoglobulin heavy locus | Homo sapiens |
| 3507      | immunoglobulin heavy constant gamma 1 (G1m marker); immunoglobulin heavy constant mu; immunoglobulin heavy variable 3-7; immunoglobulin heavy constant gamma 3 (G3m marker); immunoglobulin heavy variable 3-11 (gene/pseudogene); immunoglobulin heavy variable 4-31; immunoglobulin heavy locus | Homo sapiens |
| 3502      | immunoglobulin heavy constant gamma 1 (G1m marker); immunoglobulin heavy constant mu; immunoglobulin heavy variable 3-7; immunoglobulin heavy constant gamma 3 (G3m marker); immunoglobulin heavy variable 3-11 (gene/pseudogene); immunoglobulin heavy variable 4-31; immunoglobulin heavy locus | Homo sapiens |
| 3500      | immunoglobulin heavy constant gamma 1 (G1m marker); immunoglobulin heavy constant mu; immunoglobulin heavy variable 3-7; immunoglobulin heavy constant gamma 3 (G3m marker); immunoglobulin heavy variable 3-11 (gene/pseudogene); immunoglobulin heavy variable 4-31; immunoglobulin heavy locus | Homo sapiens |

|        |                                                                                                                                                                                                                                                                                                   |              |
|--------|---------------------------------------------------------------------------------------------------------------------------------------------------------------------------------------------------------------------------------------------------------------------------------------------------|--------------|
| 28450  | immunoglobulin heavy constant gamma 1 (G1m marker); immunoglobulin heavy constant mu; immunoglobulin heavy variable 3-7; immunoglobulin heavy constant gamma 3 (G3m marker); immunoglobulin heavy variable 3-11 (gene/pseudogene); immunoglobulin heavy variable 4-31; immunoglobulin heavy locus | Homo sapiens |
| 28396  | immunoglobulin heavy constant gamma 1 (G1m marker); immunoglobulin heavy constant mu; immunoglobulin heavy variable 3-7; immunoglobulin heavy constant gamma 3 (G3m marker); immunoglobulin heavy variable 3-11 (gene/pseudogene); immunoglobulin heavy variable 4-31; immunoglobulin heavy locus | Homo sapiens |
| 28969  | basic leucine zipper and W2 domains 2                                                                                                                                                                                                                                                             | Homo sapiens |
| 8634   | RNA terminal phosphate cyclase domain 1                                                                                                                                                                                                                                                           | Homo sapiens |
| 5573   | protein kinase, cAMP-dependent, regulatory, type I, alpha (tissue specific extinguisher 1)                                                                                                                                                                                                        | Homo sapiens |
| 6642   | sorting nexin 1                                                                                                                                                                                                                                                                                   | Homo sapiens |
| 47     | ATP citrate lyase                                                                                                                                                                                                                                                                                 | Homo sapiens |
| 54536  | exocyst complex component 6                                                                                                                                                                                                                                                                       | Homo sapiens |
| 51104  | family with sequence similarity 108, member B1                                                                                                                                                                                                                                                    | Homo sapiens |
| 5922   | RAS p21 protein activator 2                                                                                                                                                                                                                                                                       | Homo sapiens |
| 9448   | mitogen-activated protein kinase kinase kinase kinase 4                                                                                                                                                                                                                                           | Homo sapiens |
| 22796  | component of oligomeric golgi complex 2                                                                                                                                                                                                                                                           | Homo sapiens |
| 1832   | desmoplakin                                                                                                                                                                                                                                                                                       | Homo sapiens |
| 79084  | WD repeat domain 77                                                                                                                                                                                                                                                                               | Homo sapiens |
| 5770   | protein tyrosine phosphatase, non-receptor type 1                                                                                                                                                                                                                                                 | Homo sapiens |
| 8570   | KH-type splicing regulatory protein                                                                                                                                                                                                                                                               | Homo sapiens |
| 3916   | lysosomal-associated membrane protein 1                                                                                                                                                                                                                                                           | Homo sapiens |
| 23140  | zinc finger, ZZ-type with EF-hand domain 1                                                                                                                                                                                                                                                        | Homo sapiens |
| 10101  | nucleotide binding protein 2 (MinD homolog, E. coli)                                                                                                                                                                                                                                              | Homo sapiens |
| 9557   | chromodomain helicase DNA binding protein 1-like                                                                                                                                                                                                                                                  | Homo sapiens |
| 6774   | signal transducer and activator of transcription 3 (acute-phase response factor)                                                                                                                                                                                                                  | Homo sapiens |
| 6626   | small nuclear ribonucleoprotein polypeptide A                                                                                                                                                                                                                                                     | Homo sapiens |
| 5286   | phosphoinositide-3-kinase, class 2, alpha polypeptide                                                                                                                                                                                                                                             | Homo sapiens |
| 1954   | multiple EGF-like-domains 8                                                                                                                                                                                                                                                                       | Homo sapiens |
| 7165   | tumor protein D52-like 2                                                                                                                                                                                                                                                                          | Homo sapiens |
| 11311  | vacuolar protein sorting 45 homolog (S. cerevisiae)                                                                                                                                                                                                                                               | Homo sapiens |
| 65992  | DDRGK domain containing 1                                                                                                                                                                                                                                                                         | Homo sapiens |
| 7073   | TIAl cytotoxic granule-associated RNA binding protein-like 1                                                                                                                                                                                                                                      | Homo sapiens |
| 10402  | ST3 beta-galactoside alpha-2,3-sialyltransferase 6                                                                                                                                                                                                                                                | Homo sapiens |
| 5928   | hypothetical LOC642954; retinoblastoma binding protein 4                                                                                                                                                                                                                                          | Homo sapiens |
| 8330   | histone cluster 1, H2ag; histone cluster 1, H2ah; histone cluster 1, H2ai; histone cluster 1, H2ak; histone cluster 1, H2al; histone cluster 1, H2am                                                                                                                                              | Homo sapiens |
| 8336   | histone cluster 1, H2ag; histone cluster 1, H2ah; histone cluster 1, H2ai; histone cluster 1, H2ak; histone cluster 1, H2al; histone cluster 1, H2am                                                                                                                                              | Homo sapiens |
| 85235  | histone cluster 1, H2ag; histone cluster 1, H2ah; histone cluster 1, H2ai; histone cluster 1, H2ak; histone cluster 1, H2al; histone cluster 1, H2am                                                                                                                                              | Homo sapiens |
| 8329   | histone cluster 1, H2ag; histone cluster 1, H2ah; histone cluster 1, H2ai; histone cluster 1, H2ak; histone cluster 1, H2al; histone cluster 1, H2am                                                                                                                                              | Homo sapiens |
| 8969   | histone cluster 1, H2ag; histone cluster 1, H2ah; histone cluster 1, H2ai; histone cluster 1, H2ak; histone cluster 1, H2al; histone cluster 1, H2am                                                                                                                                              | Homo sapiens |
| 8332   | histone cluster 1, H2ag; histone cluster 1, H2ah; histone cluster 1, H2ai; histone cluster 1, H2ak; histone cluster 1, H2al; histone cluster 1, H2am                                                                                                                                              | Homo sapiens |
| 6749   | structure specific recognition protein 1                                                                                                                                                                                                                                                          | Homo sapiens |
| 833    | cysteinyl-tRNA synthetase                                                                                                                                                                                                                                                                         | Homo sapiens |
| 10093  | tubulin tyrosine ligase-like family, member 3; actin related protein 2/3 complex, subunit 4, 20kDa                                                                                                                                                                                                | Homo sapiens |
| 26140  | tubulin tyrosine ligase-like family, member 3; actin related protein 2/3 complex, subunit 4, 20kDa                                                                                                                                                                                                | Homo sapiens |
| 23603  | coronin, actin binding protein, 1C                                                                                                                                                                                                                                                                | Homo sapiens |
| 26064  | retinoic acid induced 14                                                                                                                                                                                                                                                                          | Homo sapiens |
| 9588   | peroxiredoxin 6                                                                                                                                                                                                                                                                                   | Homo sapiens |
| 5867   | RAB4A, member RAS oncogene family                                                                                                                                                                                                                                                                 | Homo sapiens |
| 7458   | eukaryotic translation initiation factor 4H                                                                                                                                                                                                                                                       | Homo sapiens |
| 2037   | erythrocyte membrane protein band 4.1-like 2                                                                                                                                                                                                                                                      | Homo sapiens |
| 51071  | 2-deoxyribose-5-phosphate aldolase homolog (C. elegans)                                                                                                                                                                                                                                           | Homo sapiens |
| 567    | beta-2-microglobulin                                                                                                                                                                                                                                                                              | Homo sapiens |
| 6500   | S-phase kinase-associated protein 1                                                                                                                                                                                                                                                               | Homo sapiens |
| 55339  | WD repeat domain 33                                                                                                                                                                                                                                                                               | Homo sapiens |
| 6117   | replication protein A1, 70kDa                                                                                                                                                                                                                                                                     | Homo sapiens |
| 2720   | galactosidase, beta 1                                                                                                                                                                                                                                                                             | Homo sapiens |
| 5682   | proteasome (prosome, macropain) subunit, alpha type, 1                                                                                                                                                                                                                                            | Homo sapiens |
| 10040  | target of myb1 (chicken)-like 1                                                                                                                                                                                                                                                                   | Homo sapiens |
| 4735   | septin 2                                                                                                                                                                                                                                                                                          | Homo sapiens |
| 6122   | ribosomal protein L3; similar to 60S ribosomal protein L3 (L4)                                                                                                                                                                                                                                    | Homo sapiens |
| 2947   | glutathione S-transferase mu 3 (brain)                                                                                                                                                                                                                                                            | Homo sapiens |
| 490    | ATPase, Ca <sup>++</sup> transporting, plasma membrane 1                                                                                                                                                                                                                                          | Homo sapiens |
| 201931 | transmembrane protein 192                                                                                                                                                                                                                                                                         | Homo sapiens |
| 8085   | myeloid/lymphoid or mixed-lineage leukemia 2                                                                                                                                                                                                                                                      | Homo sapiens |
| 65082  | vacuolar protein sorting 33 homolog A (S. cerevisiae)                                                                                                                                                                                                                                             | Homo sapiens |
| 51726  | DnaJ (Hsp40) homolog, subfamily B, member 11                                                                                                                                                                                                                                                      | Homo sapiens |
| 1020   | cyclin-dependent kinase 5                                                                                                                                                                                                                                                                         | Homo sapiens |
| 64225  | atlastin GTPase 2                                                                                                                                                                                                                                                                                 | Homo sapiens |
| 8237   | ubiquitin specific peptidase 11                                                                                                                                                                                                                                                                   | Homo sapiens |
| 6902   | tubulin folding cofactor A                                                                                                                                                                                                                                                                        | Homo sapiens |
| 26276  | vacuolar protein sorting 33 homolog B (yeast)                                                                                                                                                                                                                                                     | Homo sapiens |
| 1285   | collagen, type IV, alpha 3 (Goodpasture antigen)                                                                                                                                                                                                                                                  | Homo sapiens |
| 8602   | NOPI4 nucleolar protein homolog (yeast)                                                                                                                                                                                                                                                           | Homo sapiens |
| 6154   | ribosomal protein L26 pseudogene 33; ribosomal protein L26; ribosomal protein L26 pseudogene 16; ribosomal protein L26 pseudogene 19; ribosomal protein L26 pseudogene 6                                                                                                                          | Homo sapiens |
| 4733   | developmentally regulated GTP binding protein 1                                                                                                                                                                                                                                                   | Homo sapiens |

|        |                                                                                                                                     |              |
|--------|-------------------------------------------------------------------------------------------------------------------------------------|--------------|
| 11198  | suppressor of Ty 16 homolog ( <i>S. cerevisiae</i> ); suppressor of Ty 16 homolog ( <i>S. cerevisiae</i> ) pseudogene               | Homo sapiens |
| 56902  | partner of NOB1 homolog ( <i>S. cerevisiae</i> )                                                                                    | Homo sapiens |
| 11164  | nudix (nucleoside diphosphate linked moiety X)-type motif 5                                                                         | Homo sapiens |
| 6558   | solute carrier family 12 (sodium/potassium/chloride transporters), member 2                                                         | Homo sapiens |
| 56160  | necdin-like 2                                                                                                                       | Homo sapiens |
| 7204   | triple functional domain (PTPRF interacting)                                                                                        | Homo sapiens |
| 2317   | filamin B, beta (actin binding protein 278)                                                                                         | Homo sapiens |
| 3978   | ligase I, DNA, ATP-dependent                                                                                                        | Homo sapiens |
| 10802  | SEC24 family, member A ( <i>S. cerevisiae</i> )                                                                                     | Homo sapiens |
| 2804   | golgin B1, golgi integral membrane protein                                                                                          | Homo sapiens |
| 3295   | hydroxysteroid (17-beta) dehydrogenase 4                                                                                            | Homo sapiens |
| 8833   | guanine monphosphate synthetase                                                                                                     | Homo sapiens |
| 6611   | spermine synthase; similar to spermine synthase                                                                                     | Homo sapiens |
| 2044   | EPH receptor A5                                                                                                                     | Homo sapiens |
| 5093   | poly(rC) binding protein 1                                                                                                          | Homo sapiens |
| 286410 | ATPase, class VI, type 11C                                                                                                          | Homo sapiens |
| 55361  | phosphatidylinositol 4-kinase type 2 alpha                                                                                          | Homo sapiens |
| 5894   | v-raf-1 murine leukemia viral oncogene homolog 1                                                                                    | Homo sapiens |
| 55830  | glycosyltransferase 8 domain containing 1                                                                                           | Homo sapiens |
| 10220  | growth differentiation factor 11                                                                                                    | Homo sapiens |
| 25814  | ataxin 10                                                                                                                           | Homo sapiens |
| 53     | acid phosphatase 2, lysosomal                                                                                                       | Homo sapiens |
| 23473  | calpain 7                                                                                                                           | Homo sapiens |
| 26578  | osteoclast stimulating factor 1                                                                                                     | Homo sapiens |
| 5720   | proteasome (prosome, macropain) activator subunit 1 (PA28 alpha)                                                                    | Homo sapiens |
| 6241   | ribonucleotide reductase M2 polypeptide                                                                                             | Homo sapiens |
| 7323   | ubiquitin-conjugating enzyme E2D 3 (UBC4/5 homolog, yeast); ubiquitin-conjugating enzyme E2D 3 pseudogene                           | Homo sapiens |
| 3308   | heat shock 70kDa protein 4                                                                                                          | Homo sapiens |
| 60684  | chromosome 4 open reading frame 41                                                                                                  | Homo sapiens |
| 1399   | v-crk sarcoma virus CT10 oncogene homolog (avian)-like                                                                              | Homo sapiens |
| 56254  | ring finger protein 20                                                                                                              | Homo sapiens |
| 501    | aldehyde dehydrogenase 7 family, member A1                                                                                          | Homo sapiens |
| 5360   | phospholipid transfer protein                                                                                                       | Homo sapiens |
| 27020  | neuroplastin                                                                                                                        | Homo sapiens |
| 3075   | complement factor H                                                                                                                 | Homo sapiens |
| 2618   | phosphoribosylglycinamide formyltransferase, phosphoribosylglycinamide synthetase, phosphoribosylaminoimidazole synthetase          | Homo sapiens |
| 55692  | LUC7-like ( <i>S. cerevisiae</i> )                                                                                                  | Homo sapiens |
| 3493   | immunoglobulin heavy constant alpha 1                                                                                               | Homo sapiens |
| 6628   | small nuclear ribonucleoprotein polypeptides B and B1                                                                               | Homo sapiens |
| 63979  | fidgetin-like 1                                                                                                                     | Homo sapiens |
| 4430   | myosin IB                                                                                                                           | Homo sapiens |
| 655    | bone morphogenetic protein 7                                                                                                        | Homo sapiens |
| 10623  | polymerase (RNA) III (DNA directed) polypeptide C (62kd)                                                                            | Homo sapiens |
| 27347  | serine threonine kinase 39 (STE20/SPS1 homolog, yeast)                                                                              | Homo sapiens |
| 2997   | glycogen synthase 1 (muscle)                                                                                                        | Homo sapiens |
| 32     | acetyl-Coenzyme A carboxylase beta                                                                                                  | Homo sapiens |
| 85236  | histone cluster 1, H2bk                                                                                                             | Homo sapiens |
| 7417   | voltage-dependent anion channel 2                                                                                                   | Homo sapiens |
| 1783   | dynein, cytoplasmic 1, light intermediate chain 2                                                                                   | Homo sapiens |
| 23234  | DnaJ (Hsp40) homolog, subfamily C, member 9                                                                                         | Homo sapiens |
| 5595   | hypothetical LOC100271831; mitogen-activated protein kinase 5                                                                       | Homo sapiens |
| 585    | Bardet-Biedl syndrome 4                                                                                                             | Homo sapiens |
| 54549  | sidekick homolog 2 (chicken)                                                                                                        | Homo sapiens |
| 9559   | vacuolar protein sorting 26 homolog A ( <i>S. pombe</i> )                                                                           | Homo sapiens |
| 113189 | carbohydrate (N-acetylgalactosamine 4-O) sulfotransferase 14                                                                        | Homo sapiens |
| 2534   | FYN oncogene related to SRC, FGR, YES                                                                                               | Homo sapiens |
| 11190  | centrosomal protein 250kDa                                                                                                          | Homo sapiens |
| 27044  | staphylococcal nuclease and tudor domain containing 1                                                                               | Homo sapiens |
| 10094  | similar to actin related protein 2/3 complex subunit 3; hypothetical LOC729841; actin related protein 2/3 complex, subunit 3, 21kDa | Homo sapiens |
| 2717   | galactosidase, alpha                                                                                                                | Homo sapiens |
| 1615   | aspartyl-tRNA synthetase                                                                                                            | Homo sapiens |
| 5719   | proteasome (prosome, macropain) 26S subunit, non-ATPase, 13                                                                         | Homo sapiens |
| 10923  | SUB1 homolog ( <i>S. cerevisiae</i> )                                                                                               | Homo sapiens |
| 57180  | ARP3 actin-related protein 3 homolog B (yeast)                                                                                      | Homo sapiens |
| 5331   | phospholipase C, beta 3 (phosphatidylinositol-specific)                                                                             | Homo sapiens |
| 6905   | tubulin folding cofactor E                                                                                                          | Homo sapiens |
| 57410  | SCY1-like 1 ( <i>S. cerevisiae</i> )                                                                                                | Homo sapiens |
| 5313   | pyruvate kinase, liver and RBC                                                                                                      | Homo sapiens |
| 5713   | proteasome (prosome, macropain) 26S subunit, non-ATPase, 7                                                                          | Homo sapiens |
| 79875  | thrombospondin, type 1, domain containing 4                                                                                         | Homo sapiens |
| 4074   | mannose-6-phosphate receptor (cation dependent)                                                                                     | Homo sapiens |
| 5872   | RAB13, member RAS oncogene family; similar to hCG24991                                                                              | Homo sapiens |
| 5634   | phosphoribosyl pyrophosphate synthetase 2                                                                                           | Homo sapiens |
| 8500   | protein tyrosine phosphatase, receptor type, f polypeptide (PTPRF), interacting protein (liprin), alpha 1                           | Homo sapiens |
| 3837   | karyopherin (importin) beta 1                                                                                                       | Homo sapiens |
| 10985  | GCN1 general control of amino-acid synthesis 1-like 1 (yeast)                                                                       | Homo sapiens |
| 23243  | ankyrin repeat domain 28                                                                                                            | Homo sapiens |
| 667    | dystonin                                                                                                                            | Homo sapiens |
| 4057   | lactotransferrin                                                                                                                    | Homo sapiens |
| 5300   | peptidylprolyl cis/trans isomerase, NIMA-interacting 1                                                                              | Homo sapiens |
| 2280   | FK506 binding protein 1A, 12kDa                                                                                                     | Homo sapiens |

|        |                                                                                                                                                                                                                                                                 |              |
|--------|-----------------------------------------------------------------------------------------------------------------------------------------------------------------------------------------------------------------------------------------------------------------|--------------|
| 6535   | solute carrier family 6 (neurotransmitter transporter, creatine), member 8                                                                                                                                                                                      | Homo sapiens |
| 6189   | ribosomal protein S3A pseudogene 5; ribosomal protein S3a pseudogene 47; ribosomal protein S3a pseudogene 49; ribosomal protein S3A; hypothetical LOC100131699; hypothetical LOC100130107                                                                       | Homo sapiens |
| 7337   | ubiquitin protein ligase E3A                                                                                                                                                                                                                                    | Homo sapiens |
| 25920  | cofactor of BRCA1                                                                                                                                                                                                                                               | Homo sapiens |
| 9704   | DEAH (Asp-Glu-Ala-His) box polypeptide 34                                                                                                                                                                                                                       | Homo sapiens |
| 83481  | epiplakin 1                                                                                                                                                                                                                                                     | Homo sapiens |
| 7371   | uridine-cytidine kinase 2                                                                                                                                                                                                                                       | Homo sapiens |
| 10979  | fermitin family homolog 2 (Drosophila)                                                                                                                                                                                                                          | Homo sapiens |
| 3426   | complement factor I                                                                                                                                                                                                                                             | Homo sapiens |
| 64210  | MMS19 nucleotide excision repair homolog (S. cerevisiae)                                                                                                                                                                                                        | Homo sapiens |
| 1380   | complement component (3d/Epstein Barr virus) receptor 2                                                                                                                                                                                                         | Homo sapiens |
| 6204   | ribosomal protein S10; ribosomal protein S10 pseudogene 4; ribosomal protein S10 pseudogene 11; ribosomal protein S10 pseudogene 22; ribosomal protein S10 pseudogene 7; ribosomal protein S10 pseudogene 13                                                    | Homo sapiens |
| 401817 | ribosomal protein S10; ribosomal protein S10 pseudogene 4; ribosomal protein S10 pseudogene 11; ribosomal protein S10 pseudogene 22; ribosomal protein S10 pseudogene 7; ribosomal protein S10 pseudogene 13                                                    | Homo sapiens |
| 646785 | ribosomal protein S10; ribosomal protein S10 pseudogene 4; ribosomal protein S10 pseudogene 11; ribosomal protein S10 pseudogene 22; ribosomal protein S10 pseudogene 7; ribosomal protein S10 pseudogene 13                                                    | Homo sapiens |
| 391833 | ribosomal protein S10; ribosomal protein S10 pseudogene 4; ribosomal protein S10 pseudogene 11; ribosomal protein S10 pseudogene 22; ribosomal protein S10 pseudogene 7; ribosomal protein S10 pseudogene 13                                                    | Homo sapiens |
| 728791 | ribosomal protein S10; ribosomal protein S10 pseudogene 4; ribosomal protein S10 pseudogene 11; ribosomal protein S10 pseudogene 22; ribosomal protein S10 pseudogene 7; ribosomal protein S10 pseudogene 13                                                    | Homo sapiens |
| 376693 | ribosomal protein S10; ribosomal protein S10 pseudogene 4; ribosomal protein S10 pseudogene 11; ribosomal protein S10 pseudogene 22; ribosomal protein S10 pseudogene 7; ribosomal protein S10 pseudogene 13                                                    | Homo sapiens |
| 9688   | nucleoporin 93kDa                                                                                                                                                                                                                                               | Homo sapiens |
| 1994   | ELAV (embryonic lethal, abnormal vision, Drosophila)-like 1 (Hu antigen R)                                                                                                                                                                                      | Homo sapiens |
| 79654  | HECT domain containing 3                                                                                                                                                                                                                                        | Homo sapiens |
| 80349  | WD repeat domain 61                                                                                                                                                                                                                                             | Homo sapiens |
| 781    | calcium channel, voltage-dependent, alpha 2/delta subunit 1                                                                                                                                                                                                     | Homo sapiens |
| 26003  | golgi reassembly stacking protein 2, 55kDa                                                                                                                                                                                                                      | Homo sapiens |
| 113178 | secretory carrier membrane protein 4                                                                                                                                                                                                                            | Homo sapiens |
| 148362 | chromosome 1 open reading frame 58                                                                                                                                                                                                                              | Homo sapiens |
| 25852  | armadillo repeat containing 8                                                                                                                                                                                                                                   | Homo sapiens |
| 51056  | leucine aminopeptidase 3                                                                                                                                                                                                                                        | Homo sapiens |
| 5424   | polymerase (DNA directed), delta 1, catalytic subunit 125kDa                                                                                                                                                                                                    | Homo sapiens |
| 3320   | heat shock protein 90kDa alpha (cytosolic), class A member 2; heat shock protein 90kDa alpha (cytosolic), class A member 1                                                                                                                                      | Homo sapiens |
| 3324   | heat shock protein 90kDa alpha (cytosolic), class A member 2; heat shock protein 90kDa alpha (cytosolic), class A member 1                                                                                                                                      | Homo sapiens |
| 9045   | ribosomal protein L14                                                                                                                                                                                                                                           | Homo sapiens |
| 5911   | RAP2A, member of RAS oncogene family                                                                                                                                                                                                                            | Homo sapiens |
| 7334   | ubiquitin-conjugating enzyme E2N (UBC13 homolog, yeast)                                                                                                                                                                                                         | Homo sapiens |
| 23517  | superkiller viralicidic activity 2-like 2 (S. cerevisiae)                                                                                                                                                                                                       | Homo sapiens |
| 9320   | thyroid hormone receptor interactor 12                                                                                                                                                                                                                          | Homo sapiens |
| 11269  | DEAD (Asp-Glu-Ala-As) box polypeptide 19B                                                                                                                                                                                                                       | Homo sapiens |
| 645548 | heat shock 60kDa protein 1 (chaperonin) pseudogene 5; heat shock 60kDa protein 1 (chaperonin) pseudogene 6; heat shock 60kDa protein 1 (chaperonin) pseudogene 1; heat shock 60kDa protein 1 (chaperonin) pseudogene 4; heat shock 60kDa protein 1 (chaperonin) | Homo sapiens |
| 643300 | heat shock 60kDa protein 1 (chaperonin) pseudogene 5; heat shock 60kDa protein 1 (chaperonin) pseudogene 6; heat shock 60kDa protein 1 (chaperonin) pseudogene 1; heat shock 60kDa protein 1 (chaperonin) pseudogene 4; heat shock 60kDa protein 1 (chaperonin) | Homo sapiens |
| 3329   | heat shock 60kDa protein 1 (chaperonin) pseudogene 5; heat shock 60kDa protein 1 (chaperonin) pseudogene 6; heat shock 60kDa protein 1 (chaperonin) pseudogene 1; heat shock 60kDa protein 1 (chaperonin) pseudogene 4; heat shock 60kDa protein 1 (chaperonin) | Homo sapiens |
| 644745 | heat shock 60kDa protein 1 (chaperonin) pseudogene 5; heat shock 60kDa protein 1 (chaperonin) pseudogene 6; heat shock 60kDa protein 1 (chaperonin) pseudogene 1; heat shock 60kDa protein 1 (chaperonin) pseudogene 4; heat shock 60kDa protein 1 (chaperonin) | Homo sapiens |
| 345041 | heat shock 60kDa protein 1 (chaperonin) pseudogene 5; heat shock 60kDa protein 1 (chaperonin) pseudogene 6; heat shock 60kDa protein 1 (chaperonin) pseudogene 1; heat shock 60kDa protein 1 (chaperonin) pseudogene 4; heat shock 60kDa protein 1 (chaperonin) | Homo sapiens |
| 7345   | ubiquitin carboxyl-terminal esterase L1 (ubiquitin thiolesterase)                                                                                                                                                                                               | Homo sapiens |
| 116985 | ArfGAP with RhoGAP domain, ankyrin repeat and PH domain 1                                                                                                                                                                                                       | Homo sapiens |
| 23637  | RAB GTPase activating protein 1                                                                                                                                                                                                                                 | Homo sapiens |
| 4643   | myosin IE                                                                                                                                                                                                                                                       | Homo sapiens |
| 23265  | exocyst complex component 7                                                                                                                                                                                                                                     | Homo sapiens |
| 27350  | apolipoprotein B mRNA editing enzyme, catalytic polypeptide-like 3C                                                                                                                                                                                             | Homo sapiens |
| 81     | actinin, alpha 4                                                                                                                                                                                                                                                | Homo sapiens |
| 5580   | protein kinase C, delta                                                                                                                                                                                                                                         | Homo sapiens |
| 5610   | eukaryotic translation initiation factor 2-alpha kinase 2                                                                                                                                                                                                       | Homo sapiens |
| 5413   | septin 5                                                                                                                                                                                                                                                        | Homo sapiens |
| 51534  | Vps20-associated 1 homolog (S. cerevisiae)                                                                                                                                                                                                                      | Homo sapiens |
| 11260  | exportin, tRNA (nuclear export receptor for tRNAs); similar to Exportin-T (tRNA exportin) (Exportin(tRNA))                                                                                                                                                      | Homo sapiens |
| 9533   | polymerase (RNA) I polypeptide C, 30kDa                                                                                                                                                                                                                         | Homo sapiens |
| 3098   | hexokinase 1                                                                                                                                                                                                                                                    | Homo sapiens |
| 5781   | protein tyrosine phosphatase, non-receptor type 11; similar to protein tyrosine phosphatase, non-receptor type 11                                                                                                                                               | Homo sapiens |
| 10096  | ARP3 actin-related protein 3 homolog (yeast)                                                                                                                                                                                                                    | Homo sapiens |
| 824    | calpain 2, (m/II) large subunit                                                                                                                                                                                                                                 | Homo sapiens |

|        |                                                                                                                                                                                                                                |              |
|--------|--------------------------------------------------------------------------------------------------------------------------------------------------------------------------------------------------------------------------------|--------------|
| 2288   | FK506 binding protein 4, 59kDa                                                                                                                                                                                                 | Homo sapiens |
| 27072  | vacuolar protein sorting 41 homolog ( <i>S. cerevisiae</i> )                                                                                                                                                                   | Homo sapiens |
| 5091   | pyruvate carboxylase                                                                                                                                                                                                           | Homo sapiens |
| 6643   | sorting nexin 2                                                                                                                                                                                                                | Homo sapiens |
| 5586   | protein kinase N2                                                                                                                                                                                                              | Homo sapiens |
| 6429   | splicing factor, arginine/serine-rich 4                                                                                                                                                                                        | Homo sapiens |
| 166378 | spermatogenesis associated 5                                                                                                                                                                                                   | Homo sapiens |
| 55770  | exocyst complex component 2                                                                                                                                                                                                    | Homo sapiens |
| 10487  | CAP, adenylate cyclase-associated protein 1 (yeast)                                                                                                                                                                            | Homo sapiens |
| 6051   | arginyl aminopeptidase (aminopeptidase B)                                                                                                                                                                                      | Homo sapiens |
| 8939   | far upstream element (FUSE) binding protein 3                                                                                                                                                                                  | Homo sapiens |
| 9821   | RB1-inducible coiled-coil 1                                                                                                                                                                                                    | Homo sapiens |
| 55922  | NFKB repressing factor                                                                                                                                                                                                         | Homo sapiens |
| 4839   | NOP2 nucleolar protein homolog (yeast)                                                                                                                                                                                         | Homo sapiens |
| 1781   | similar to dynein cytoplasmic 1 intermediate chain 2; dynein, cytoplasmic 1, intermediate chain 2                                                                                                                              | Homo sapiens |
| 11051  | nudix (nucleoside diphosphate linked moiety X)-type motif 21                                                                                                                                                                   | Homo sapiens |
| 2790   | DnaJ (Hsp40) homolog, subfamily C, member 25; guanine nucleotide binding protein (G protein), gamma 10; DNAJC25-GNG10 readthrough transcript                                                                                   | Homo sapiens |
| 8895   | copine III                                                                                                                                                                                                                     | Homo sapiens |
| 2192   | fibulin 1                                                                                                                                                                                                                      | Homo sapiens |
| 7411   | von Hippel-Lindau binding protein 1                                                                                                                                                                                            | Homo sapiens |
| 6793   | serine/threonine kinase 10                                                                                                                                                                                                     | Homo sapiens |
| 10541  | similar to Acidic leucine-rich nuclear phosphoprotein 32 family member B (PHAPI2 protein) (Silver-stainable protein SSP29) (Acidic protein rich in leucines); acidic (leucine-rich) nuclear phosphoprotein 32 family, member B | Homo sapiens |
| 8450   | cullin 4B                                                                                                                                                                                                                      | Homo sapiens |
| 11316  | coatamer protein complex, subunit epsilon                                                                                                                                                                                      | Homo sapiens |
| 7058   | thrombospondin 2                                                                                                                                                                                                               | Homo sapiens |
| 10483  | Sec23 homolog B ( <i>S. cerevisiae</i> )                                                                                                                                                                                       | Homo sapiens |
| 5351   | procollagen-lysine 1, 2-oxoglutarate 5-dioxygenase 1                                                                                                                                                                           | Homo sapiens |
| 10159  | ATPase, H+ transporting, lysosomal accessory protein 2                                                                                                                                                                         | Homo sapiens |
| 1212   | clathrin, light chain (Lcb)                                                                                                                                                                                                    | Homo sapiens |
| 56922  | methylcrotonoyl-Coenzyme A carboxylase 1 (alpha)                                                                                                                                                                               | Homo sapiens |
| 54039  | poly(rC) binding protein 3                                                                                                                                                                                                     | Homo sapiens |
| 23019  | CCR4-NOT transcription complex, subunit 1                                                                                                                                                                                      | Homo sapiens |
| 5756   | twinfilin, actin-binding protein, homolog 1 ( <i>Drosophila</i> )                                                                                                                                                              | Homo sapiens |
| 2787   | guanine nucleotide binding protein (G protein), gamma 5                                                                                                                                                                        | Homo sapiens |
| 301    | annexin A1                                                                                                                                                                                                                     | Homo sapiens |
| 5684   | proteasome (prosome, macropain) subunit, alpha type, 3                                                                                                                                                                         | Homo sapiens |
| 9567   | GTP binding protein 1                                                                                                                                                                                                          | Homo sapiens |
| 23365  | Rho guanine nucleotide exchange factor (GEF) 12                                                                                                                                                                                | Homo sapiens |
| 5621   | prion protein                                                                                                                                                                                                                  | Homo sapiens |
| 1075   | cathepsin C                                                                                                                                                                                                                    | Homo sapiens |
| 64422  | ATG3 autophagy related 3 homolog ( <i>S. cerevisiae</i> )                                                                                                                                                                      | Homo sapiens |
| 27348  | torsin family 1, member B (torsin B)                                                                                                                                                                                           | Homo sapiens |
| 6205   | ribosomal protein S11 pseudogene 5; ribosomal protein S11                                                                                                                                                                      | Homo sapiens |
| 56889  | transmembrane 9 superfamily member 3                                                                                                                                                                                           | Homo sapiens |
| 23350  | U2-associated SR140 protein                                                                                                                                                                                                    | Homo sapiens |
| 34     | acyl-Coenzyme A dehydrogenase, C-4 to C-12 straight chain                                                                                                                                                                      | Homo sapiens |
| 29763  | protein kinase C and casein kinase substrate in neurons 3                                                                                                                                                                      | Homo sapiens |
| 91056  | DKFZp761E198 protein                                                                                                                                                                                                           | Homo sapiens |
| 11021  | similar to hCG1778032; RAB35, member RAS oncogene family                                                                                                                                                                       | Homo sapiens |
| 54892  | non-SMC condensin II complex, subunit G2                                                                                                                                                                                       | Homo sapiens |
| 6653   | sortilin-related receptor, L(DLR class) A repeats-containing                                                                                                                                                                   | Homo sapiens |
| 163    | adaptor-related protein complex 2, beta 1 subunit                                                                                                                                                                              | Homo sapiens |
| 2621   | similar to growth arrest-specific 6; growth arrest-specific 6                                                                                                                                                                  | Homo sapiens |
| 7266   | DnaJ (Hsp40) homolog, subfamily C, member 7                                                                                                                                                                                    | Homo sapiens |
| 7105   | tetraspanin 6                                                                                                                                                                                                                  | Homo sapiens |
| 51155  | hematological and neurological expressed 1                                                                                                                                                                                     | Homo sapiens |
| 440917 | similar to 14-3-3 protein epsilon (14-3-3E) (Mitochondrial import stimulation factor L subunit) (MSF L); tyrosine 3-monooxygenase/tryptophan 5-monooxygenase activation protein, epsilon polypeptide                           | Homo sapiens |
| 7531   | similar to 14-3-3 protein epsilon (14-3-3E) (Mitochondrial import stimulation factor L subunit) (MSF L); tyrosine 3-monooxygenase/tryptophan 5-monooxygenase activation protein, epsilon polypeptide                           | Homo sapiens |
| 116442 | RAB39B, member RAS oncogene family                                                                                                                                                                                             | Homo sapiens |
| 5134   | programmed cell death 2                                                                                                                                                                                                        | Homo sapiens |
| 80185  | chromosome 8 open reading frame 41                                                                                                                                                                                             | Homo sapiens |
| 8073   | protein tyrosine phosphatase type IVA, member 2                                                                                                                                                                                | Homo sapiens |
| 3094   | histidine triad nucleotide binding protein 1                                                                                                                                                                                   | Homo sapiens |
| 11188  | nischarin                                                                                                                                                                                                                      | Homo sapiens |
| 55229  | pantothenate kinase 4                                                                                                                                                                                                          | Homo sapiens |
| 3251   | hypoxanthine phosphoribosyltransferase 1                                                                                                                                                                                       | Homo sapiens |
| 26046  | ring finger protein 160                                                                                                                                                                                                        | Homo sapiens |
| 2950   | glutathione S-transferase pi 1                                                                                                                                                                                                 | Homo sapiens |
| 27339  | PRP19/PSO4 pre-mRNA processing factor 19 homolog ( <i>S. cerevisiae</i> )                                                                                                                                                      | Homo sapiens |
| 10273  | STIP1 homology and U-box containing protein 1                                                                                                                                                                                  | Homo sapiens |
| 2040   | stomatin                                                                                                                                                                                                                       | Homo sapiens |
| 9125   | RCD1 required for cell differentiation1 homolog ( <i>S. pombe</i> )                                                                                                                                                            | Homo sapiens |
| 1825   | desmocollin 3                                                                                                                                                                                                                  | Homo sapiens |
| 4830   | non-metastatic cells 1, protein (NM23A) expressed in; NME1-NME2 readthrough transcript; non-metastatic cells 2, protein (NM23B) expressed in                                                                                   | Homo sapiens |
| 4831   | non-metastatic cells 1, protein (NM23A) expressed in; NME1-NME2 readthrough transcript; non-metastatic cells 2, protein (NM23B) expressed in                                                                                   | Homo sapiens |

|        |                                                                                                                                              |              |
|--------|----------------------------------------------------------------------------------------------------------------------------------------------|--------------|
| 654364 | non-metastatic cells 1, protein (NM23A) expressed in; NME1-NME2 readthrough transcript; non-metastatic cells 2, protein (NM23B) expressed in | Homo sapiens |
| 26973  | cysteine and histidine-rich domain (CHORD)-containing 1; cysteine and histidine-rich domain (CHORD)-containing 1 pseudogene                  | Homo sapiens |
| 51599  | lipolysis stimulated lipoprotein receptor                                                                                                    | Homo sapiens |
| 146691 | target of myb1-like 2 (chicken)                                                                                                              | Homo sapiens |
| 2771   | guanine nucleotide binding protein (G protein), alpha inhibiting activity polypeptide 2                                                      | Homo sapiens |
| 55577  | N-acetylglucosamine kinase                                                                                                                   | Homo sapiens |
| 27183  | vacuolar protein sorting 4 homolog A ( <i>S. cerevisiae</i> )                                                                                | Homo sapiens |
| 10121  | ARPI actin-related protein 1 homolog A, centractin alpha (yeast)                                                                             | Homo sapiens |
| 6645   | syntrophin, beta 2 (dystrophin-associated protein A1, 59kDa, basic component 2)                                                              | Homo sapiens |
| 26002  | monooxygenase, DBH-like 1                                                                                                                    | Homo sapiens |
| 10938  | EH-domain containing 1                                                                                                                       | Homo sapiens |
| 10755  | GIPC PDZ domain containing family, member 1                                                                                                  | Homo sapiens |
| 1514   | cathepsin L1                                                                                                                                 | Homo sapiens |
| 5050   | platelet-activating factor acetylhydrolase, isoform Ib, subunit 3 (29kDa)                                                                    | Homo sapiens |
| 5706   | proteasome (prosome, macropain) 26S subunit, ATPase, 6                                                                                       | Homo sapiens |
| 391    | ras homolog gene family, member G (rho G)                                                                                                    | Homo sapiens |
| 23284  | latrophilin 3                                                                                                                                | Homo sapiens |
| 10213  | proteasome (prosome, macropain) 26S subunit, non-ATPase, 14                                                                                  | Homo sapiens |
| 79784  | myosin, heavy chain 14                                                                                                                       | Homo sapiens |
| 5062   | p21 protein (Cdc42/Rac)-activated kinase 2                                                                                                   | Homo sapiens |
| 10006  | abl-interactor 1                                                                                                                             | Homo sapiens |
| 10652  | YKT6 v-SNARE homolog ( <i>S. cerevisiae</i> )                                                                                                | Homo sapiens |
| 7372   | uridine monophosphate synthetase                                                                                                             | Homo sapiens |
| 10920  | COP9 constitutive photomorphogenic homolog subunit 8 ( <i>Arabidopsis</i> )                                                                  | Homo sapiens |
| 8454   | cullin 1                                                                                                                                     | Homo sapiens |
| 7360   | UDP-glucose pyrophosphorylase 2                                                                                                              | Homo sapiens |
| 2239   | glypican 4                                                                                                                                   | Homo sapiens |
| 2318   | filamin C, gamma (actin binding protein 280)                                                                                                 | Homo sapiens |
| 55703  | polymerase (RNA) III (DNA directed) polypeptide B                                                                                            | Homo sapiens |
| 8624   | proteasome (prosome, macropain) assembly chaperone 1                                                                                         | Homo sapiens |
| 9943   | oxidative-stress responsive 1                                                                                                                | Homo sapiens |
| 5007   | oxysterol binding protein                                                                                                                    | Homo sapiens |
| 9521   | eukaryotic translation elongation factor 1 epsilon 1                                                                                         | Homo sapiens |
| 2314   | flightless I homolog ( <i>Drosophila</i> )                                                                                                   | Homo sapiens |
| 5837   | phosphorylase, glycogen, muscle                                                                                                              | Homo sapiens |
| 6193   | ribosomal protein S5                                                                                                                         | Homo sapiens |
| 2035   | erythrocyte membrane protein band 4.1 (elliptocytosis 1, RH-linked)                                                                          | Homo sapiens |
| 1293   | collagen, type VI, alpha 3                                                                                                                   | Homo sapiens |
| 10694  | similar to chaperonin containing TCP1, subunit 8 (theta); chaperonin containing TCP1, subunit 8 (theta)                                      | Homo sapiens |
| 10598  | AHA1, activator of heat shock 90kDa protein ATPase homolog 1 (yeast)                                                                         | Homo sapiens |
| 9146   | hepatocyte growth factor-regulated tyrosine kinase substrate                                                                                 | Homo sapiens |
| 9918   | non-SMC condensin I complex, subunit D2                                                                                                      | Homo sapiens |
| 55737  | hypothetical protein LOC100133770; vacuolar protein sorting 35 homolog ( <i>S. cerevisiae</i> )                                              | Homo sapiens |
| 8411   | early endosome antigen 1                                                                                                                     | Homo sapiens |
| 23406  | coactosin-like 1 ( <i>Dictyostelium</i> )                                                                                                    | Homo sapiens |
| 23047  | PDS5, regulator of cohesion maintenance, homolog B ( <i>S. cerevisiae</i> )                                                                  | Homo sapiens |
| 5431   | polymerase (RNA) II (DNA directed) polypeptide B, 140kDa                                                                                     | Homo sapiens |
| 2775   | guanine nucleotide binding protein (G protein), alpha activating activity polypeptide 0                                                      | Homo sapiens |
| 373    | tripartite motif-containing 23                                                                                                               | Homo sapiens |
| 1917   | eukaryotic translation elongation factor 1 alpha 2                                                                                           | Homo sapiens |
| 10970  | cytoskeleton-associated protein 4                                                                                                            | Homo sapiens |
| 56647  | BRCA2 and CDKN1A interacting protein                                                                                                         | Homo sapiens |
| 7316   | ubiquitin C                                                                                                                                  | Homo sapiens |
| 5802   | protein tyrosine phosphatase, receptor type, S                                                                                               | Homo sapiens |
| 3838   | karyopherin alpha 2 (RAG cohort 1, importin alpha 1); karyopherin alpha-2 subunit like                                                       | Homo sapiens |
| 1650   | dolichyl-diphosphooligosaccharide-protein glycosyltransferase                                                                                | Homo sapiens |
| 6633   | small nuclear ribonucleoprotein D2 polypeptide 16.5kDa; similar to hCG2040270                                                                | Homo sapiens |
| 22948  | chaperonin containing TCP1, subunit 5 (epsilon)                                                                                              | Homo sapiens |
| 1487   | C-terminal binding protein 1                                                                                                                 | Homo sapiens |
| 334    | amyloid beta (A4) precursor-like protein 2                                                                                                   | Homo sapiens |
| 7317   | ubiquitin-like modifier activating enzyme 1                                                                                                  | Homo sapiens |
| 9529   | BCL2-associated athanogene 5                                                                                                                 | Homo sapiens |
| 23413  | frequenin homolog ( <i>Drosophila</i> )                                                                                                      | Homo sapiens |
| 3987   | LIM and senescent cell antigen-like domains 1                                                                                                | Homo sapiens |
| 54407  | solute carrier family 38, member 2                                                                                                           | Homo sapiens |
| 1072   | cofilin 1 (non-muscle)                                                                                                                       | Homo sapiens |
| 8218   | clathrin, heavy chain-like 1                                                                                                                 | Homo sapiens |
| 1292   | collagen, type VI, alpha 2                                                                                                                   | Homo sapiens |
| 79659  | dynein, cytoplasmic 2, heavy chain 1                                                                                                         | Homo sapiens |
| 7533   | tyrosine 3-monooxygenase/tryptophan 5-monooxygenase activation protein, eta polypeptide                                                      | Homo sapiens |
| 928    | CD9 molecule                                                                                                                                 | Homo sapiens |
| 221184 | copine II                                                                                                                                    | Homo sapiens |
| 5327   | plasminogen activator, tissue                                                                                                                | Homo sapiens |
| 5499   | protein phosphatase 1, catalytic subunit, alpha isoform                                                                                      | Homo sapiens |
| 7416   | voltage-dependent anion channel 1; similar to voltage-dependent anion channel 1                                                              | Homo sapiens |
| 23347  | structural maintenance of chromosomes flexible hinge domain containing 1                                                                     | Homo sapiens |
| 3685   | integrin, alpha V (vitronectin receptor, alpha polypeptide, antigen CD51)                                                                    | Homo sapiens |
| 6228   | ribosomal protein S23                                                                                                                        | Homo sapiens |
| 84661  | dpy-30 homolog ( <i>C. elegans</i> )                                                                                                         | Homo sapiens |
| 10658  | CUG triplet repeat, RNA binding protein 1                                                                                                    | Homo sapiens |
| 9219   | metastasis associated 1 family, member 2                                                                                                     | Homo sapiens |
| 10327  | aldo-keto reductase family 1, member A1 (aldehyde reductase)                                                                                 | Homo sapiens |
| 1737   | dihydroipoamide S-acetyltransferase                                                                                                          | Homo sapiens |



|        |                                                                                                        |              |
|--------|--------------------------------------------------------------------------------------------------------|--------------|
| 51068  | NMD3 homolog ( <i>S. cerevisiae</i> )                                                                  | Homo sapiens |
| 51028  | vacuolar protein sorting 36 homolog ( <i>S. cerevisiae</i> )                                           | Homo sapiens |
| 22818  | coatamer protein complex, subunit zeta 1                                                               | Homo sapiens |
| 8826   | IQ motif containing GTPase activating protein 1                                                        | Homo sapiens |
| 8878   | sequestosome 1                                                                                         | Homo sapiens |
| 8471   | insulin receptor substrate 4                                                                           | Homo sapiens |
| 51013  | exosome component 1                                                                                    | Homo sapiens |
| 10480  | eukaryotic translation initiation factor 3, subunit M                                                  | Homo sapiens |
| 4926   | nuclear mitotic apparatus protein 1                                                                    | Homo sapiens |
| 60496  | aminoadipate-semialdehyde dehydrogenase-phosphopantetheinyl transferase                                | Homo sapiens |
| 6844   | vesicle-associated membrane protein 2 (synaptobrevin 2)                                                | Homo sapiens |
| 382    | ADP-ribosylation factor 6                                                                              | Homo sapiens |
| 174    | alpha-fetoprotein                                                                                      | Homo sapiens |
| 51399  | trafficking protein particle complex 4                                                                 | Homo sapiens |
| 10971  | tyrosine 3-monooxygenase/tryptophan 5-monooxygenase activation protein, theta polypeptide              | Homo sapiens |
| 23122  | cytoplasmic linker associated protein 2                                                                | Homo sapiens |
| 25782  | RAB3 GTPase activating protein subunit 2 (non-catalytic)                                               | Homo sapiens |
| 8892   | eukaryotic translation initiation factor 2B, subunit 2 beta, 39kDa                                     | Homo sapiens |
| 3305   | heat shock 70kDa protein 1-like                                                                        | Homo sapiens |
| 3371   | tenascin C                                                                                             | Homo sapiens |
| 201626 | phosphodiesterase 12                                                                                   | Homo sapiens |
| 29780  | parvin, beta                                                                                           | Homo sapiens |
| 7077   | TIMP metalloproteinase inhibitor 2                                                                     | Homo sapiens |
| 2195   | FAT tumor suppressor homolog 1 ( <i>Drosophila</i> )                                                   | Homo sapiens |
| 1445   | c-src tyrosine kinase                                                                                  | Homo sapiens |
| 9061   | 3'-phosphoadenosine 5'-phosphosulfate synthase 1                                                       | Homo sapiens |
| 6422   | secreted frizzled-related protein 1                                                                    | Homo sapiens |
| 79932  | KIAA0319-like                                                                                          | Homo sapiens |
| 59342  | serine carboxypeptidase 1                                                                              | Homo sapiens |
| 56984  | proteasome (prosome, macropain) assembly chaperone 2                                                   | Homo sapiens |
| 22827  | poly-U binding splicing factor 60KDa                                                                   | Homo sapiens |
| 3185   | heterogeneous nuclear ribonucleoprotein F                                                              | Homo sapiens |
| 1729   | diaphanous homolog 1 ( <i>Drosophila</i> )                                                             | Homo sapiens |
| 5119   | chromatin modifying protein 1A                                                                         | Homo sapiens |
| 9742   | intraflagellar transport 140 homolog ( <i>Chlamydomonas</i> )                                          | Homo sapiens |
| 5538   | palmitoyl-protein thioesterase 1                                                                       | Homo sapiens |
| 4646   | myosin VI                                                                                              | Homo sapiens |
| 83442  | SH3 domain binding glutamic acid-rich protein like 3                                                   | Homo sapiens |
| 7520   | X-ray repair complementing defective repair in Chinese hamster cells 5 (double-strand-break rejoining) | Homo sapiens |
| 682    | basigin (Ok blood group)                                                                               | Homo sapiens |
| 11273  | ataxin 2-like                                                                                          | Homo sapiens |
| 23136  | erythrocyte membrane protein band 4.1-like 3                                                           | Homo sapiens |
| 23354  | HAUS augmin-like complex, subunit 5                                                                    | Homo sapiens |
| 11091  | WD repeat domain 5                                                                                     | Homo sapiens |
| 3703   | STT3, subunit of the oligosaccharyltransferase complex, homolog A ( <i>S. cerevisiae</i> )             | Homo sapiens |
| 9618   | TNF receptor-associated factor 4                                                                       | Homo sapiens |
| 64682  | anaphase promoting complex subunit 1; similar to anaphase promoting complex subunit 1                  | Homo sapiens |
| 10544  | protein C receptor, endothelial (EPCR)                                                                 | Homo sapiens |
| 9919   | SEC16 homolog A ( <i>S. cerevisiae</i> )                                                               | Homo sapiens |
| 10142  | A kinase (PRKA) anchor protein (yotiao) 9                                                              | Homo sapiens |
| 873    | carbonyl reductase 1                                                                                   | Homo sapiens |
| 83737  | itchy E3 ubiquitin protein ligase homolog (mouse)                                                      | Homo sapiens |
| 10048  | RAN binding protein 9                                                                                  | Homo sapiens |
| 9019   | myelin protein zero-like 1                                                                             | Homo sapiens |
| 1756   | dystrophin                                                                                             | Homo sapiens |
| 23534  | transportin 3                                                                                          | Homo sapiens |
| 3956   | lectin, galactoside-binding, soluble, 1                                                                | Homo sapiens |
| 8841   | histone deacetylase 3                                                                                  | Homo sapiens |
| 7167   | TPII pseudogene; triosephosphate isomerase 1                                                           | Homo sapiens |
| 729708 | TPII pseudogene; triosephosphate isomerase 1                                                           | Homo sapiens |
| 92597  | MOB1, Mps One Binder kinase activator-like 1A (yeast)                                                  | Homo sapiens |
| 2778   | GNAS complex locus                                                                                     | Homo sapiens |
| 23016  | exosome component 7                                                                                    | Homo sapiens |
| 85461  | tetratricopeptide repeat, ankyrin repeat and coiled-coil containing 1                                  | Homo sapiens |
| 1464   | chondroitin sulfate proteoglycan 4                                                                     | Homo sapiens |
| 80781  | collagen, type XVIII, alpha 1                                                                          | Homo sapiens |
| 22978  | 5'-nucleotidase, cytosolic II                                                                          | Homo sapiens |
| 8289   | AT rich interactive domain 1A (SWI-like)                                                               | Homo sapiens |
| 57609  | DIP2 disco-interacting protein 2 homolog B ( <i>Drosophila</i> )                                       | Homo sapiens |
| 8723   | sorting nexin 4                                                                                        | Homo sapiens |
| 5792   | protein tyrosine phosphatase, receptor type, F                                                         | Homo sapiens |
| 523    | ATPase, H+ transporting, lysosomal 70kDa, VI subunit A                                                 | Homo sapiens |
| 1936   | eukaryotic translation elongation factor 1 delta (guanine nucleotide exchange protein)                 | Homo sapiens |
| 51637  | chromosome 14 open reading frame 166                                                                   | Homo sapiens |
| 4343   | Mov10, Moloney leukemia virus 10, homolog (mouse)                                                      | Homo sapiens |
| 6526   | solute carrier family 5 (sodium/myo-inositol cotransporter), member 3                                  | Homo sapiens |
| 2770   | guanine nucleotide binding protein (G protein), alpha inhibiting activity polypeptide 1                | Homo sapiens |
| 6742   | single-stranded DNA binding protein 1                                                                  | Homo sapiens |
| 4811   | nidogen 1                                                                                              | Homo sapiens |
| 1207   | chloride channel, nucleotide-sensitive, 1A                                                             | Homo sapiens |
| 10575  | chaperonin containing TCP1, subunit 4 (delta)                                                          | Homo sapiens |
| 2475   | mechanistic target of rapamycin (serine/threonine kinase)                                              | Homo sapiens |
| 83660  | talin 2                                                                                                | Homo sapiens |
| 5037   | phosphatidylethanolamine binding protein 1                                                             | Homo sapiens |
| 493    | ATPase, Ca++ transporting, plasma membrane 4                                                           | Homo sapiens |

|        |                                                                                                                                                                              |              |
|--------|------------------------------------------------------------------------------------------------------------------------------------------------------------------------------|--------------|
| 738    | chromosome 11 open reading frame2                                                                                                                                            | Homo sapiens |
| 23228  | phospholipase C-like 2                                                                                                                                                       | Homo sapiens |
| 10491  | cartilage associated protein                                                                                                                                                 | Homo sapiens |
| 6602   | SWI/SNF related, matrix associated, actin dependent regulator of chromatin, subfamily d, member 1                                                                            | Homo sapiens |
| 1889   | endothelin converting enzyme 1                                                                                                                                               | Homo sapiens |
| 1793   | dedicator of cytokinesis 1                                                                                                                                                   | Homo sapiens |
| 10419  | protein arginine methyltransferase 5                                                                                                                                         | Homo sapiens |
| 22931  | RAB18, member RAS oncogene family                                                                                                                                            | Homo sapiens |
| 5879   | ras-related C3 botulinum toxin substrate 1 (rho family, small GTP binding protein Rac1)                                                                                      | Homo sapiens |
| 3911   | laminin, alpha 5                                                                                                                                                             | Homo sapiens |
| 6184   | ribophorin I                                                                                                                                                                 | Homo sapiens |
| 5862   | RAB2A, member RAS oncogene family                                                                                                                                            | Homo sapiens |
| 1984   | eukaryotic translation initiation factor 5A; eukaryotic translation initiation factor 5A-like 1                                                                              | Homo sapiens |
| 143244 | eukaryotic translation initiation factor 5A; eukaryotic translation initiation factor 5A-like 1                                                                              | Homo sapiens |
| 57136  | chromosome 20 open reading frame 3                                                                                                                                           | Homo sapiens |
| 1639   | dynactin 1 (p150, glued homolog, Drosophila)                                                                                                                                 | Homo sapiens |
| 6894   | TAR (HIV-1) RNA binding protein 1                                                                                                                                            | Homo sapiens |
| 23760  | phosphatidylinositol transfer protein, beta                                                                                                                                  | Homo sapiens |
| 118    | adducin 1 (alpha)                                                                                                                                                            | Homo sapiens |
| 9138   | Rho guanine nucleotide exchange factor (GEF) 1                                                                                                                               | Homo sapiens |
| 4313   | matrix metalloproteinase 2 (gelatinase A, 72kDa gelatinase, 72kDa type IV collagenase)                                                                                       | Homo sapiens |
| 6230   | ribosomal protein S25 pseudogene 8; ribosomal protein S25                                                                                                                    | Homo sapiens |
| 5167   | ectonucleotide pyrophosphatase/phosphodiesterase 1                                                                                                                           | Homo sapiens |
| 72     | actin, gamma 2, smooth muscle, enteric                                                                                                                                       | Homo sapiens |
| 5754   | PTK7 protein tyrosine kinase 7                                                                                                                                               | Homo sapiens |
| 729    | complement component 6                                                                                                                                                       | Homo sapiens |
| 1937   | eukaryotic translation elongation factor 1 gamma                                                                                                                             | Homo sapiens |
| 4001   | lamin B1                                                                                                                                                                     | Homo sapiens |
| 10640  | exocyst complex component 5                                                                                                                                                  | Homo sapiens |
| 10946  | splicing factor 3a, subunit 3, 60kDa                                                                                                                                         | Homo sapiens |
| 10512  | sema domain, immunoglobulin domain (Ig), short basic domain, secreted, (semaphorin) 3C                                                                                       | Homo sapiens |
| 10514  | MYB binding protein (P160) 1a                                                                                                                                                | Homo sapiens |
| 79228  | THO complex 6 homolog (Drosophila)                                                                                                                                           | Homo sapiens |
| 2495   | ferritin, heavy polypeptide 1; ferritin, heavy polypeptide-like 16; similar to ferritin, heavy polypeptide 1; ferritin, heavy polypeptide-like 3 pseudogene                  | Homo sapiens |
| 81929  | SEH1-like (S. cerevisiae)                                                                                                                                                    | Homo sapiens |
| 2664   | GDP dissociation inhibitor 1                                                                                                                                                 | Homo sapiens |
| 23633  | karyopherin alpha 6 (importin alpha 7)                                                                                                                                       | Homo sapiens |
| 4143   | methionine adenosyltransferase 1, alpha                                                                                                                                      | Homo sapiens |
| 55720  | TSR1, 20S rRNA accumulation, homolog (S. cerevisiae)                                                                                                                         | Homo sapiens |
| 4851   | Notch homolog 1, translocation-associated (Drosophila)                                                                                                                       | Homo sapiens |
| 7284   | Tu translation elongation factor, mitochondrial                                                                                                                              | Homo sapiens |
| 135228 | CD109 molecule                                                                                                                                                               | Homo sapiens |
| 6678   | secreted protein, acidic, cysteine-rich (osteonectin)                                                                                                                        | Homo sapiens |
| 10949  | heterogeneous nuclear ribonucleoprotein A0                                                                                                                                   | Homo sapiens |
| 6386   | syndecan binding protein (syntenin)                                                                                                                                          | Homo sapiens |
| 10043  | hypothetical LOC100128526; target of mybl (chicken)                                                                                                                          | Homo sapiens |
| 91663  | myeloid-associated differentiation marker                                                                                                                                    | Homo sapiens |
| 8428   | serine/threonine kinase 24 (STE20 homolog, yeast)                                                                                                                            | Homo sapiens |
| 3700   | inter-alpha (globulin) inhibitor H4 (plasma Kallikrein-sensitive glycoprotein)                                                                                               | Homo sapiens |
| 57020  | chromosome 16 open reading frame 62                                                                                                                                          | Homo sapiens |
| 51119  | Shwachman-Bodian-Diamond syndrome pseudogene; Shwachman-Bodian-Diamond syndrome                                                                                              | Homo sapiens |
| 23521  | ribosomal protein L13a pseudogene 7; ribosomal protein L13a pseudogene 5; ribosomal protein L13a pseudogene 16; ribosomal protein L13a; ribosomal protein L13a pseudogene 18 | Homo sapiens |
| 51202  | DEAD (Asp-Glu-Ala-Asp) box polypeptide 47                                                                                                                                    | Homo sapiens |
| 8661   | eukaryotic translation initiation factor 3, subunit A                                                                                                                        | Homo sapiens |
| 115290 | F-box protein 17                                                                                                                                                             | Homo sapiens |
| 5768   | quiescin Q6 sulfhydryl oxidase 1                                                                                                                                             | Homo sapiens |
| 5584   | protein kinase C, iota                                                                                                                                                       | Homo sapiens |
| 529    | ATPase, H+ transporting, lysosomal 31kDa, V1 subunit E1                                                                                                                      | Homo sapiens |
| 5705   | proteasome (prosome, macropain) 26S subunit, ATPase, 5                                                                                                                       | Homo sapiens |
| 9445   | integral membrane protein 2B                                                                                                                                                 | Homo sapiens |
| 9871   | SEC24 family, member D (S. cerevisiae)                                                                                                                                       | Homo sapiens |
| 55622  | tetratricopeptide repeat domain 27                                                                                                                                           | Homo sapiens |
| 2043   | EPH receptor A4                                                                                                                                                              | Homo sapiens |
| 8702   | UDP-Gal:betaGlcNAc beta 1,4- galactosyltransferase, polypeptide 4                                                                                                            | Homo sapiens |
| 6133   | ribosomal protein L9; ribosomal protein L9 pseudogene 25                                                                                                                     | Homo sapiens |
| 3419   | isocitrate dehydrogenase 3 (NAD+) alpha                                                                                                                                      | Homo sapiens |
| 63891  | ring finger protein 123                                                                                                                                                      | Homo sapiens |
| 4629   | myosin, heavy chain 11, smooth muscle                                                                                                                                        | Homo sapiens |
| 56954  | nitrilase family, member 2                                                                                                                                                   | Homo sapiens |
| 26227  | phosphoglycerate dehydrogenase                                                                                                                                               | Homo sapiens |
| 7052   | transglutaminase 2 (C polypeptide, protein-glutamine-gamma-glutamyltransferase)                                                                                              | Homo sapiens |
| 5036   | proliferation-associated 2G4, 38kDa; proliferation-associated 2G4 pseudogene 4                                                                                               | Homo sapiens |
| 10992  | splicing factor 3b, subunit 2, 145kDa                                                                                                                                        | Homo sapiens |
| 8621   | cell division cycle 2-like 5 (cholinesterase-related cell division controller)                                                                                               | Homo sapiens |
| 3184   | heterogeneous nuclear ribonucleoprotein D (AU-rich element RNA binding protein 1, 37kDa)                                                                                     | Homo sapiens |
| 10728  | prostaglandin E synthase 3 (cytosolic)                                                                                                                                       | Homo sapiens |
| 23352  | ubiquitin protein ligase E3 component n-recognin 4                                                                                                                           | Homo sapiens |
| 7045   | transforming growth factor, beta-induced, 68kDa                                                                                                                              | Homo sapiens |
| 9894   | TEL2, telomere maintenance 2, homolog (S. cerevisiae)                                                                                                                        | Homo sapiens |
| 27336  | HIV-1 Tat specific factor 1                                                                                                                                                  | Homo sapiens |
| 6427   | splicing factor, arginine/serine-rich 2                                                                                                                                      | Homo sapiens |
| 8425   | latent transforming growth factor beta binding protein 4                                                                                                                     | Homo sapiens |
| 6782   | heat shock protein 70kDa family, member 13                                                                                                                                   | Homo sapiens |

|        |                                                                                                                                                                         |              |
|--------|-------------------------------------------------------------------------------------------------------------------------------------------------------------------------|--------------|
| 57465  | TBC1 domain family, member 24                                                                                                                                           | Homo sapiens |
| 23256  | sec1 family domain containing 1                                                                                                                                         | Homo sapiens |
| 6301   | seryl-tRNA synthetase                                                                                                                                                   | Homo sapiens |
| 26000  | TBC1 domain family, member 10B                                                                                                                                          | Homo sapiens |
| 829    | capping protein (actin filament) muscle Z-line, alpha 1                                                                                                                 | Homo sapiens |
| 4756   | neogenin homolog 1 (chicken)                                                                                                                                            | Homo sapiens |
| 8175   | splicing factor 3a, subunit 2, 66kDa                                                                                                                                    | Homo sapiens |
| 5033   | prolyl 4-hydroxylase, alpha polypeptide I                                                                                                                               | Homo sapiens |
| 2617   | glycyl-tRNA synthetase                                                                                                                                                  | Homo sapiens |
| 4301   | similar to Afadin (Protein AF-6); myeloid/lymphoid or mixed-lineage leukemia (trithorax homolog, Drosophila); translocated to, 4                                        | Homo sapiens |
| 79633  | FAT tumor suppressor homolog 4 (Drosophila)                                                                                                                             | Homo sapiens |
| 9798   | similar to CG10103; KIAA0174                                                                                                                                            | Homo sapiens |
| 728533 | similar to CG10103; KIAA0174                                                                                                                                            | Homo sapiens |
| 6164   | ribosomal protein L34                                                                                                                                                   | Homo sapiens |
| 9978   | ring-box 1                                                                                                                                                              | Homo sapiens |
| 6810   | syntaxin 4                                                                                                                                                              | Homo sapiens |
| 2287   | FK506 binding protein 3, 25kDa                                                                                                                                          | Homo sapiens |
| 23476  | bromodomain containing 4                                                                                                                                                | Homo sapiens |
| 4436   | mutS homolog 2, colon cancer, nonpolyposis type 1 (E. coli)                                                                                                             | Homo sapiens |
| 3796   | kinesin heavy chain member 2A                                                                                                                                           | Homo sapiens |
| 1983   | eukaryotic translation initiation factor 5                                                                                                                              | Homo sapiens |
| 216    | aldehyde dehydrogenase 1 family, member A1                                                                                                                              | Homo sapiens |
| 2316   | filamin A, alpha (actin binding protein 280)                                                                                                                            | Homo sapiens |
| 10135  | nicotinamide phosphoribosyltransferase                                                                                                                                  | Homo sapiens |
| 10436  | EMG1 nucleolar protein homolog (S. cerevisiae)                                                                                                                          | Homo sapiens |
| 23513  | scribbled homolog (Drosophila)                                                                                                                                          | Homo sapiens |
| 7419   | voltage-dependent anion channel 3                                                                                                                                       | Homo sapiens |
| 79443  | FYVE and coiled-coil domain containing 1                                                                                                                                | Homo sapiens |
| 27250  | programmed cell death 4 (neoplastic transformation inhibitor)                                                                                                           | Homo sapiens |
| 6134   | ribosomal protein L10; ribosomal protein L10 pseudogene 15; ribosomal protein L10 pseudogene 6; ribosomal protein L10 pseudogene 16; ribosomal protein L10 pseudogene 9 | Homo sapiens |
| 4641   | myosin 1C                                                                                                                                                               | Homo sapiens |
| 55845  | chromosome 3 open reading frame 10                                                                                                                                      | Homo sapiens |
| 10584  | collectin sub-family member 10 (C-type lectin)                                                                                                                          | Homo sapiens |
| 3636   | inositol polyphosphate phosphatase-like 1                                                                                                                               | Homo sapiens |
| 5795   | protein tyrosine phosphatase, receptor type, J                                                                                                                          | Homo sapiens |
| 51735  | Rap guanine nucleotide exchange factor (GEF) 6                                                                                                                          | Homo sapiens |
| 60314  | chromosome 12 open reading frame 10                                                                                                                                     | Homo sapiens |
| 8260   | ARD1 homolog A, N-acetyltransferase (S. cerevisiae)                                                                                                                     | Homo sapiens |
| 4361   | MRE11 meiotic recombination 11 homolog A (S. cerevisiae)                                                                                                                | Homo sapiens |
| 23176  | septin 8                                                                                                                                                                | Homo sapiens |
| 22894  | DIS3 mitotic control homolog (S. cerevisiae)                                                                                                                            | Homo sapiens |
| 830    | capping protein (actin filament) muscle Z-line, alpha 2                                                                                                                 | Homo sapiens |
| 259217 | heat shock 70kDa protein 12A                                                                                                                                            | Homo sapiens |
| 83690  | cysteine-rich secretory protein LCCL domain containing 1                                                                                                                | Homo sapiens |
| 3631   | inositol polyphosphate-4-phosphatase, type I, 107kDa                                                                                                                    | Homo sapiens |
| 5906   | RAP1A, member of RAS oncogene family                                                                                                                                    | Homo sapiens |
| 92181  | ubiquitin domain containing 2                                                                                                                                           | Homo sapiens |
| 129563 | DIS3 mitotic control homolog (S. cerevisiae)-like 2                                                                                                                     | Homo sapiens |
| 1362   | carboxypeptidase D                                                                                                                                                      | Homo sapiens |
| 7511   | X-prolyl aminopeptidase (aminopeptidase P) 1, soluble                                                                                                                   | Homo sapiens |
| 3689   | integrin, beta 2 (complement component 3 receptor 3 and 4 subunit)                                                                                                      | Homo sapiens |
| 22982  | DIP2 disco-interacting protein 2 homolog C (Drosophila)                                                                                                                 | Homo sapiens |
| 3678   | integrin, alpha 5 (fibronectin receptor, alpha polypeptide)                                                                                                             | Homo sapiens |
| 231    | aldo-keto reductase family 1, member B1 (aldose reductase)                                                                                                              | Homo sapiens |
| 57614  | KIAA1468                                                                                                                                                                | Homo sapiens |
| 10152  | abl interactor 2                                                                                                                                                        | Homo sapiens |
| 23397  | non-SMC condensin I complex, subunit H                                                                                                                                  | Homo sapiens |
| 57805  | KIAA1967                                                                                                                                                                | Homo sapiens |
| 23516  | solute carrier family 39 (zinc transporter), member 14                                                                                                                  | Homo sapiens |
| 59345  | guanine nucleotide binding protein (G protein), beta polypeptide 4                                                                                                      | Homo sapiens |
| 2098   | esterase D/formylglutathione hydrolase                                                                                                                                  | Homo sapiens |
| 3339   | heparan sulfate proteoglycan 2                                                                                                                                          | Homo sapiens |
| 8669   | eukaryotic translation initiation factor 3, subunit J                                                                                                                   | Homo sapiens |
| 6143   | ribosomal protein L19; ribosomal protein L19 pseudogene 12                                                                                                              | Homo sapiens |
| 23042  | pyridoxal-dependent decarboxylase domain containing 1                                                                                                                   | Homo sapiens |
| 6142   | ribosomal protein L18a pseudogene 6; ribosomal protein L18a                                                                                                             | Homo sapiens |
| 10960  | lectin, mannose-binding 2                                                                                                                                               | Homo sapiens |
| 6202   | ribosomal protein S8; ribosomal protein S8 pseudogene 8; ribosomal protein S8 pseudogene 10                                                                             | Homo sapiens |
| 57504  | metastasis associated 1 family, member 3                                                                                                                                | Homo sapiens |
| 8566   | pyridoxal (pyridoxine, vitamin B6) kinase                                                                                                                               | Homo sapiens |
| 64795  | required for meiotic nuclear division 5 homolog A (S. cerevisiae)                                                                                                       | Homo sapiens |
| 10525  | hypoxia up-regulated 1                                                                                                                                                  | Homo sapiens |
| 2896   | granulin                                                                                                                                                                | Homo sapiens |
| 6416   | mitogen-activated protein kinase kinase 4                                                                                                                               | Homo sapiens |
| 1153   | cold inducible RNA binding protein                                                                                                                                      | Homo sapiens |
| 23332  | cytoplasmic linker associated protein 1                                                                                                                                 | Homo sapiens |
| 1457   | casein kinase 2, alpha 1 polypeptide pseudogene; casein kinase 2, alpha 1 polypeptide                                                                                   | Homo sapiens |
| 5983   | replication factor C (activator 1) 3, 38kDa                                                                                                                             | Homo sapiens |
| 5094   | poly(rC) binding protein 2                                                                                                                                              | Homo sapiens |
| 645    | biliverdin reductase B (flavin reductase (NADPH))                                                                                                                       | Homo sapiens |
| 6146   | ribosomal protein L22 pseudogene 11; ribosomal protein L22                                                                                                              | Homo sapiens |
| 1622   | diazepam binding inhibitor (GABA receptor modulator, acyl-Coenzyme A binding protein)                                                                                   | Homo sapiens |
| 57511  | component of oligomeric golgi complex 6                                                                                                                                 | Homo sapiens |
| 5214   | phosphofructokinase, platelet                                                                                                                                           | Homo sapiens |

|        |                                                                                                                                                                                                                                     |              |
|--------|-------------------------------------------------------------------------------------------------------------------------------------------------------------------------------------------------------------------------------------|--------------|
| 80019  | ubiquitin domain containing 1                                                                                                                                                                                                       | Homo sapiens |
| 55165  | centrosomal protein 55kDa                                                                                                                                                                                                           | Homo sapiens |
| 307    | annexin A4                                                                                                                                                                                                                          | Homo sapiens |
| 5211   | phosphofructokinase, liver                                                                                                                                                                                                          | Homo sapiens |
| 3692   | eukaryotic translation initiation factor 6                                                                                                                                                                                          | Homo sapiens |
| 11128  | polymerase (RNA) III (DNA directed) polypeptide A, 155kDa                                                                                                                                                                           | Homo sapiens |
| 91754  | NIMA (never in mitosis gene a)- related kinase 9                                                                                                                                                                                    | Homo sapiens |
| 6208   | ribosomal protein S14                                                                                                                                                                                                               | Homo sapiens |
| 60626  | resistance to inhibitors of cholinesterase 8 homolog A (C. elegans)                                                                                                                                                                 | Homo sapiens |
| 5690   | proteasome (prosome, macropain) subunit, beta type, 2                                                                                                                                                                               | Homo sapiens |
| 84817  | thioredoxin domain containing 17                                                                                                                                                                                                    | Homo sapiens |
| 481    | ATPase, Na+/K+ transporting, beta 1 polypeptide                                                                                                                                                                                     | Homo sapiens |
| 5565   | protein kinase, AMP-activated, beta 2 non-catalytic subunit                                                                                                                                                                         | Homo sapiens |
| 6453   | intersectin 1 (SH3 domain protein)                                                                                                                                                                                                  | Homo sapiens |
| 10254  | signal transducing adaptor molecule (SH3 domain and ITAM motif) 2                                                                                                                                                                   | Homo sapiens |
| 10311  | Down syndrome critical region gene 3                                                                                                                                                                                                | Homo sapiens |
| 158078 | eukaryotic translation elongation factor 1 alpha-like 7; eukaryotic translation elongation factor 1 alpha-like 3; similar to eukaryotic translation elongation factor 1 alpha 1; eukaryotic translation elongation factor 1 alpha 1 | Homo sapiens |
| 1915   | eukaryotic translation elongation factor 1 alpha-like 7; eukaryotic translation elongation factor 1 alpha-like 3; similar to eukaryotic translation elongation factor 1 alpha 1; eukaryotic translation elongation factor 1 alpha 1 | Homo sapiens |
| 8970   | histone cluster 1, H2bj                                                                                                                                                                                                             | Homo sapiens |
| 2171   | fatty acid binding protein 5-like 2; fatty acid binding protein 5 (psoriasis-associated); fatty acid binding protein 5-like 8; fatty acid binding protein 5-like 7; fatty acid binding protein 5-like 9                             | Homo sapiens |
| 728641 | fatty acid binding protein 5-like 2; fatty acid binding protein 5 (psoriasis-associated); fatty acid binding protein 5-like 8; fatty acid binding protein 5-like 7; fatty acid binding protein 5-like 9                             | Homo sapiens |
| 114034 | target of EGRI, member 1 (nuclear)                                                                                                                                                                                                  | Homo sapiens |
| 64601  | vacuolar protein sorting 16 homolog A (S. cerevisiae)                                                                                                                                                                               | Homo sapiens |
| 1774   | deoxyribonuclease I-like 1                                                                                                                                                                                                          | Homo sapiens |
| 58490  | regulation of nuclear pre-mRNA domain containing 1B                                                                                                                                                                                 | Homo sapiens |
| 64710  | nuclear casein kinase and cyclin-dependent kinase substrate 1                                                                                                                                                                       | Homo sapiens |
| 5176   | serpin peptidase inhibitor, clade F (alpha-2 antiplasmin, pigment epithelium derived factor), member 1                                                                                                                              | Homo sapiens |
| 23355  | vacuolar protein sorting 8 homolog (S. cerevisiae)                                                                                                                                                                                  | Homo sapiens |
| 158    | adenylosuccinate lyase                                                                                                                                                                                                              | Homo sapiens |
| 4053   | latent transforming growth factor beta binding protein 2                                                                                                                                                                            | Homo sapiens |
| 9513   | fragile X mental retardation, autosomal homolog 2                                                                                                                                                                                   | Homo sapiens |
| 10954  | protein disulfide isomerase family A, member 5                                                                                                                                                                                      | Homo sapiens |
| 8407   | transgelin 2                                                                                                                                                                                                                        | Homo sapiens |
| 7106   | tetraspanin 4                                                                                                                                                                                                                       | Homo sapiens |
| 2182   | acyl-CoA synthetase long-chain family member 4                                                                                                                                                                                      | Homo sapiens |
| 1281   | collagen, type III, alpha 1                                                                                                                                                                                                         | Homo sapiens |
| 8451   | cullin 4A                                                                                                                                                                                                                           | Homo sapiens |
| 7373   | collagen, type XIV, alpha 1                                                                                                                                                                                                         | Homo sapiens |
| 10772  | FUS interacting protein (serine/arginine-rich) 1; similar to FUS interacting protein (serine-arginine rich) 1                                                                                                                       | Homo sapiens |
| 23196  | family with sequence similarity 120A                                                                                                                                                                                                | Homo sapiens |
| 5315   | similar to Pyruvate kinase, isozymes M1/M2 (Pyruvate kinase muscle isozyme) (Cytosolic thyroid hormone-binding protein) (CTHBP) (THBP1); pyruvate kinase, muscle                                                                    | Homo sapiens |
| 22916  | nuclear cap binding protein subunit 2, 20kDa                                                                                                                                                                                        | Homo sapiens |
| 6612   | SMT3 suppressor of mif two 3 homolog 2 (S. cerevisiae) pseudogene; SMT3 suppressor of mif two 3 homolog 2 (S. cerevisiae); SMT3 suppressor of mif two 3 homolog 3 (S. cerevisiae)                                                   | Homo sapiens |
| 6613   | SMT3 suppressor of mif two 3 homolog 2 (S. cerevisiae) pseudogene; SMT3 suppressor of mif two 3 homolog 2 (S. cerevisiae); SMT3 suppressor of mif two 3 homolog 3 (S. cerevisiae)                                                   | Homo sapiens |
| 5738   | prostaglandin F2 receptor negative regulator                                                                                                                                                                                        | Homo sapiens |
| 80727  | tweety homolog 3 (Drosophila)                                                                                                                                                                                                       | Homo sapiens |
| 22907  | DEAH (Asp-Glu-Ala-His) box polypeptide 30                                                                                                                                                                                           | Homo sapiens |
| 2181   | acyl-CoA synthetase long-chain family member 3                                                                                                                                                                                      | Homo sapiens |
| 11124  | Fas (TNFRSF6) associated factor 1                                                                                                                                                                                                   | Homo sapiens |
| 2162   | coagulation factor XIII, A1 polypeptide                                                                                                                                                                                             | Homo sapiens |
| 7283   | tubulin, gamma 1; similar to Tubulin, gamma 1                                                                                                                                                                                       | Homo sapiens |
| 10787  | NCK-associated protein 1                                                                                                                                                                                                            | Homo sapiens |
| 10484  | Sec23 homolog A (S. cerevisiae)                                                                                                                                                                                                     | Homo sapiens |
| 25873  | ribosomal protein L36; ribosomal protein L36 pseudogene 14                                                                                                                                                                          | Homo sapiens |
| 54331  | guanine nucleotide binding protein (G protein), gamma 2                                                                                                                                                                             | Homo sapiens |
| 84245  | methylthioribose-1-phosphate isomerase homolog (S. cerevisiae)                                                                                                                                                                      | Homo sapiens |
| 5297   | phosphatidylinositol 4-kinase, catalytic, alpha                                                                                                                                                                                     | Homo sapiens |
| 1973   | similar to eukaryotic translation initiation factor 4A; small nucleolar RNA, H/ACA box 67; eukaryotic translation initiation factor 4A, isoform 1                                                                                   | Homo sapiens |
| 9898   | ubiquitin associated protein 2-like                                                                                                                                                                                                 | Homo sapiens |
| 23392  | KIAA0368                                                                                                                                                                                                                            | Homo sapiens |
| 23503  | zinc finger, FYVE domain containing 26                                                                                                                                                                                              | Homo sapiens |
| 1192   | chloride intracellular channel 1                                                                                                                                                                                                    | Homo sapiens |
| 56681  | SARI homolog A (S. cerevisiae)                                                                                                                                                                                                      | Homo sapiens |
| 5425   | polymerase (DNA directed), delta 2, regulatory subunit 50kDa                                                                                                                                                                        | Homo sapiens |
| 11196  | SEC23 interacting protein                                                                                                                                                                                                           | Homo sapiens |
| 55573  | CDV3 homolog (mouse)                                                                                                                                                                                                                | Homo sapiens |
| 89970  | ring finger and SPRY domain containing 1                                                                                                                                                                                            | Homo sapiens |
| 89953  | kinesin light chain 4                                                                                                                                                                                                               | Homo sapiens |
| 10418  | spondin 1, extracellular matrix protein                                                                                                                                                                                             | Homo sapiens |
| 5976   | UPF1 regulator of nonsense transcripts homolog (yeast)                                                                                                                                                                              | Homo sapiens |
| 613    | breakpoint cluster region                                                                                                                                                                                                           | Homo sapiens |

|        |                                                                                                                                                                                                                                                    |              |
|--------|----------------------------------------------------------------------------------------------------------------------------------------------------------------------------------------------------------------------------------------------------|--------------|
| 8324   | frizzled homolog 7 ( <i>Drosophila</i> )                                                                                                                                                                                                           | Homo sapiens |
| 8623   | acetylserotonin O-methyltransferase-like                                                                                                                                                                                                           | Homo sapiens |
| 6217   | ribosomal protein S16 pseudogene 1; ribosomal protein S16 pseudogene 10; ribosomal protein S16                                                                                                                                                     | Homo sapiens |
| 441876 | ribosomal protein S16 pseudogene 1; ribosomal protein S16 pseudogene 10; ribosomal protein S16                                                                                                                                                     | Homo sapiens |
| 729903 | ribosomal protein S16 pseudogene 1; ribosomal protein S16 pseudogene 10; ribosomal protein S16                                                                                                                                                     | Homo sapiens |
| 6118   | replication protein A2, 32kDa                                                                                                                                                                                                                      | Homo sapiens |
| 54584  | guanine nucleotide binding protein (G protein), beta polypeptide 1-like                                                                                                                                                                            | Homo sapiens |
| 4069   | lysozyme (renal amyloidosis)                                                                                                                                                                                                                       | Homo sapiens |
| 152137 | coiled-coil domain containing 50                                                                                                                                                                                                                   | Homo sapiens |
| 5793   | protein tyrosine phosphatase, receptor type, G                                                                                                                                                                                                     | Homo sapiens |
| 6814   | syntaxin binding protein 3                                                                                                                                                                                                                         | Homo sapiens |
| 6195   | ribosomal protein S6 kinase, 90kDa, polypeptide 1                                                                                                                                                                                                  | Homo sapiens |
| 3073   | hexosaminidase A (alpha polypeptide)                                                                                                                                                                                                               | Homo sapiens |
| 5954   | reticulocalbin 1, EF-hand calcium binding domain                                                                                                                                                                                                   | Homo sapiens |
| 8985   | procollagen-lysine, 2-oxoglutarate 5-dioxygenase 3                                                                                                                                                                                                 | Homo sapiens |
| 6129   | ribosomal protein L7 pseudogene 26; ribosomal protein L7 pseudogene 16; ribosomal protein L7;<br>ribosomal protein L7 pseudogene 32; ribosomal protein L7 pseudogene 23; ribosomal protein L7<br>pseudogene 24; ribosomal protein L7 pseudogene 20 | Homo sapiens |
| 9987   | heterogeneous nuclear ribonucleoprotein D-like                                                                                                                                                                                                     | Homo sapiens |
| 1974   | similar to eukaryotic translation initiation factor 4A2; eukaryotic translation initiation factor<br>4A, isoform 2                                                                                                                                 | Homo sapiens |
| 7803   | protein tyrosine phosphatase type IVA, member 1                                                                                                                                                                                                    | Homo sapiens |
| 6305   | SET binding factor 1; SET binding factor 1 pseudogene 1                                                                                                                                                                                            | Homo sapiens |
| 6059   | similar to ATP-binding cassette, sub-family E, member 1; ATP-binding cassette, sub-family E (OABP),<br>member 1                                                                                                                                    | Homo sapiens |
| 6717   | sorcin                                                                                                                                                                                                                                             | Homo sapiens |
| 64856  | von Willebrand factor A domain containing 1                                                                                                                                                                                                        | Homo sapiens |
| 7726   | tripartite motif-containing 26                                                                                                                                                                                                                     | Homo sapiens |
| 65123  | integrator complex subunit 3                                                                                                                                                                                                                       | Homo sapiens |
| 83658  | dynein, light chain, roadblock-type 1                                                                                                                                                                                                              | Homo sapiens |
| 64222  | torsin family 3, member A                                                                                                                                                                                                                          | Homo sapiens |
| 3716   | Janus kinase 1                                                                                                                                                                                                                                     | Homo sapiens |
| 477    | ATPase, Na <sup>+</sup> /K <sup>+</sup> transporting, alpha 2 (+) polypeptide                                                                                                                                                                      | Homo sapiens |
| 4678   | nuclear autoantigenic sperm protein (histone-binding)                                                                                                                                                                                              | Homo sapiens |
| 8574   | aldo-keto reductase family 7, member A2 (aflatoxin aldehyde reductase)                                                                                                                                                                             | Homo sapiens |
| 10840  | aldehyde dehydrogenase 1 family, member L1                                                                                                                                                                                                         | Homo sapiens |
| 6293   | vacuolar protein sorting 52 homolog ( <i>S. cerevisiae</i> )                                                                                                                                                                                       | Homo sapiens |
| 23515  | MORC family CW-type zinc finger 3                                                                                                                                                                                                                  | Homo sapiens |
| 25929  | gem (nuclear organelle) associated protein 5                                                                                                                                                                                                       | Homo sapiens |
| 51400  | protein phosphatase methylesterase 1                                                                                                                                                                                                               | Homo sapiens |
| 7112   | thymopoietin                                                                                                                                                                                                                                       | Homo sapiens |
| 3065   | histone deacetylase 1                                                                                                                                                                                                                              | Homo sapiens |
| 23344  | family with sequence similarity 62 (C2 domain containing), member A                                                                                                                                                                                | Homo sapiens |
| 988    | CDC5 cell division cycle 5-like ( <i>S. pombe</i> )                                                                                                                                                                                                | Homo sapiens |
| 63916  | engulfment and cell motility 2                                                                                                                                                                                                                     | Homo sapiens |
| 348    | hypothetical LOC100129500; apolipoprotein E                                                                                                                                                                                                        | Homo sapiens |
| 84309  | nudix (nucleoside diphosphate linked moiety X)-type motif 16-like 1                                                                                                                                                                                | Homo sapiens |
| 10980  | COP9 constitutive photomorphogenic homolog subunit 6 ( <i>Arabidopsis</i> )                                                                                                                                                                        | Homo sapiens |
| 6124   | ribosomal protein L4; ribosomal protein L4 pseudogene 5; ribosomal protein L4 pseudogene 4                                                                                                                                                         | Homo sapiens |
| 284217 | laminin, alpha 1                                                                                                                                                                                                                                   | Homo sapiens |
| 5689   | proteasome (prosome, macropain) subunit, beta type, 1                                                                                                                                                                                              | Homo sapiens |
| 221092 | heterogeneous nuclear ribonucleoprotein U-like 2                                                                                                                                                                                                   | Homo sapiens |
| 440    | asparagine synthetase                                                                                                                                                                                                                              | Homo sapiens |
| 9128   | PRP4 pre-mRNA processing factor 4 homolog (yeast)                                                                                                                                                                                                  | Homo sapiens |
| 10382  | tubulin, beta 4                                                                                                                                                                                                                                    | Homo sapiens |
| 328    | APEX nuclease (multifunctional DNA repair enzyme) 1                                                                                                                                                                                                | Homo sapiens |
| 7424   | vascular endothelial growth factor C                                                                                                                                                                                                               | Homo sapiens |
| 8239   | ubiquitin specific peptidase 9, X-linked                                                                                                                                                                                                           | Homo sapiens |
| 51652  | vacuolar protein sorting 24 homolog ( <i>S. cerevisiae</i> ); ring finger protein 103                                                                                                                                                              | Homo sapiens |
| 230    | aldolase C, fructose-bisphosphate                                                                                                                                                                                                                  | Homo sapiens |
| 30001  | ER01-like ( <i>S. cerevisiae</i> )                                                                                                                                                                                                                 | Homo sapiens |
| 4052   | latent transforming growth factor beta binding protein 1                                                                                                                                                                                           | Homo sapiens |
| 23708  | G1 to S phase transition 2                                                                                                                                                                                                                         | Homo sapiens |
| 4233   | met proto-oncogene (hepatocyte growth factor receptor)                                                                                                                                                                                             | Homo sapiens |
| 55749  | cell division cycle and apoptosis regulator 1                                                                                                                                                                                                      | Homo sapiens |
| 5437   | polymerase (RNA) II (DNA directed) polypeptide H                                                                                                                                                                                                   | Homo sapiens |
| 483    | ATPase, Na <sup>+</sup> /K <sup>+</sup> transporting, beta 3 polypeptide                                                                                                                                                                           | Homo sapiens |
| 9252   | ribosomal protein S6 kinase, 90kDa, polypeptide 5                                                                                                                                                                                                  | Homo sapiens |
| 8565   | tyrosyl-tRNA synthetase                                                                                                                                                                                                                            | Homo sapiens |
| 11034  | destrin (actin depolymerizing factor)                                                                                                                                                                                                              | Homo sapiens |
| 81627  | chromosome 1 open reading frame 25                                                                                                                                                                                                                 | Homo sapiens |
| 1785   | dynamitin 2                                                                                                                                                                                                                                        | Homo sapiens |
| 9748   | STE20-like kinase (yeast)                                                                                                                                                                                                                          | Homo sapiens |
| 5111   | proliferating cell nuclear antigen                                                                                                                                                                                                                 | Homo sapiens |
| 79029  | spermatogenesis associated 5-like 1                                                                                                                                                                                                                | Homo sapiens |
| 4221   | multiple endocrine neoplasia I                                                                                                                                                                                                                     | Homo sapiens |
| 51639  | splicing factor 3B, 14 kDa subunit                                                                                                                                                                                                                 | Homo sapiens |
| 57403  | RAB22A, member RAS oncogene family                                                                                                                                                                                                                 | Homo sapiens |
| 7178   | similar to tumor protein, translationally-controlled 1; tumor protein, translationally-controlled 1                                                                                                                                                | Homo sapiens |
| 55697  | Vac14 homolog ( <i>S. cerevisiae</i> )                                                                                                                                                                                                             | Homo sapiens |
| 22878  | KIAA1012                                                                                                                                                                                                                                           | Homo sapiens |
| 10056  | phenylalanyl-tRNA synthetase, beta subunit                                                                                                                                                                                                         | Homo sapiens |
| 498    | ATP synthase, H <sup>+</sup> transporting, mitochondrial F1 complex, alpha subunit 1, cardiac muscle                                                                                                                                               | Homo sapiens |
| 5836   | phosphorylase, glycogen, liver                                                                                                                                                                                                                     | Homo sapiens |
| 4175   | minichromosome maintenance complex component 6                                                                                                                                                                                                     | Homo sapiens |

|        |                                                                                                                                                                                                                                                                                                                                                          |              |
|--------|----------------------------------------------------------------------------------------------------------------------------------------------------------------------------------------------------------------------------------------------------------------------------------------------------------------------------------------------------------|--------------|
| 54919  | HEAT repeat containing 2                                                                                                                                                                                                                                                                                                                                 | Homo sapiens |
| 353    | adenine phosphoribosyltransferase                                                                                                                                                                                                                                                                                                                        | Homo sapiens |
| 10987  | COP9 constitutive photomorphogenic homolog subunit 5 (Arabidopsis)                                                                                                                                                                                                                                                                                       | Homo sapiens |
| 1488   | C-terminal binding protein 2                                                                                                                                                                                                                                                                                                                             | Homo sapiens |
| 5905   | Ran GTPase activating protein 1                                                                                                                                                                                                                                                                                                                          | Homo sapiens |
| 9652   | tetratricopeptide repeat domain 37                                                                                                                                                                                                                                                                                                                       | Homo sapiens |
| 223    | aldehyde dehydrogenase 9 family, member A1                                                                                                                                                                                                                                                                                                               | Homo sapiens |
| 52     | acid phosphatase 1, soluble                                                                                                                                                                                                                                                                                                                              | Homo sapiens |
| 132    | adenosine kinase                                                                                                                                                                                                                                                                                                                                         | Homo sapiens |
| 2934   | gelsolin (amyloidosis, Finnish type)                                                                                                                                                                                                                                                                                                                     | Homo sapiens |
| 23468  | chromobox homolog 5 (HP1 alpha homolog, Drosophila)                                                                                                                                                                                                                                                                                                      | Homo sapiens |
| 2047   | EPH receptor B1                                                                                                                                                                                                                                                                                                                                          | Homo sapiens |
| 124801 | LSM12 homolog (S. cerevisiae)                                                                                                                                                                                                                                                                                                                            | Homo sapiens |
| 4669   | N-acetylglucosaminidase, alpha-                                                                                                                                                                                                                                                                                                                          | Homo sapiens |
| 7307   | U2 small nuclear RNA auxiliary factor 1                                                                                                                                                                                                                                                                                                                  | Homo sapiens |
| 126961 | histone cluster 1, H3j; histone cluster 1, H3i; histone cluster 1, H3h; histone cluster 1, H3g;<br>histone cluster 1, H3f; histone cluster 1, H3e; histone cluster 1, H3d; histone cluster 1, H3c;<br>histone cluster 2, H3c; histone cluster 2, H3d                                                                                                     | Homo sapiens |
| 3013   | histone cluster 1, H3j; histone cluster 1, H3i; histone cluster 1, H3h; histone cluster 1, H3g;<br>histone cluster 1, H3f; histone cluster 1, H3e; histone cluster 1, H3d; histone cluster 1, H3c;<br>histone cluster 1, H3b; histone cluster 1, H3a; histone cluster 1, H2ad; histone cluster 2, H3a;                                                   | Homo sapiens |
| 8356   | histone cluster 2, H3c; histone cluster 2, H3d<br>histone cluster 1, H3j; histone cluster 1, H3i; histone cluster 1, H3h; histone cluster 1, H3g;<br>histone cluster 1, H3f; histone cluster 1, H3e; histone cluster 1, H3d; histone cluster 1, H3c;<br>histone cluster 1, H3b; histone cluster 1, H3a; histone cluster 1, H2ad; histone cluster 2, H3a; | Homo sapiens |
| 8351   | histone cluster 2, H3c; histone cluster 2, H3d<br>histone cluster 1, H3j; histone cluster 1, H3i; histone cluster 1, H3h; histone cluster 1, H3g;<br>histone cluster 1, H3f; histone cluster 1, H3e; histone cluster 1, H3d; histone cluster 1, H3c;<br>histone cluster 1, H3b; histone cluster 1, H3a; histone cluster 1, H2ad; histone cluster 2, H3a; | Homo sapiens |
| 653604 | histone cluster 2, H3c; histone cluster 2, H3d<br>histone cluster 1, H3j; histone cluster 1, H3i; histone cluster 1, H3h; histone cluster 1, H3g;<br>histone cluster 1, H3f; histone cluster 1, H3e; histone cluster 1, H3d; histone cluster 1, H3c;<br>histone cluster 1, H3b; histone cluster 1, H3a; histone cluster 1, H2ad; histone cluster 2, H3a; | Homo sapiens |
| 333932 | histone cluster 2, H3c; histone cluster 2, H3d<br>histone cluster 1, H3j; histone cluster 1, H3i; histone cluster 1, H3h; histone cluster 1, H3g;<br>histone cluster 1, H3f; histone cluster 1, H3e; histone cluster 1, H3d; histone cluster 1, H3c;<br>histone cluster 1, H3b; histone cluster 1, H3a; histone cluster 1, H2ad; histone cluster 2, H3a; | Homo sapiens |
| 8968   | histone cluster 2, H3c; histone cluster 2, H3d<br>histone cluster 1, H3j; histone cluster 1, H3i; histone cluster 1, H3h; histone cluster 1, H3g;<br>histone cluster 1, H3f; histone cluster 1, H3e; histone cluster 1, H3d; histone cluster 1, H3c;<br>histone cluster 1, H3b; histone cluster 1, H3a; histone cluster 1, H2ad; histone cluster 2, H3a; | Homo sapiens |
| 8354   | histone cluster 2, H3c; histone cluster 2, H3d<br>histone cluster 1, H3j; histone cluster 1, H3i; histone cluster 1, H3h; histone cluster 1, H3g;<br>histone cluster 1, H3f; histone cluster 1, H3e; histone cluster 1, H3d; histone cluster 1, H3c;<br>histone cluster 1, H3b; histone cluster 1, H3a; histone cluster 1, H2ad; histone cluster 2, H3a; | Homo sapiens |
| 8357   | histone cluster 2, H3c; histone cluster 2, H3d<br>histone cluster 1, H3j; histone cluster 1, H3i; histone cluster 1, H3h; histone cluster 1, H3g;<br>histone cluster 1, H3f; histone cluster 1, H3e; histone cluster 1, H3d; histone cluster 1, H3c;<br>histone cluster 1, H3b; histone cluster 1, H3a; histone cluster 1, H2ad; histone cluster 2, H3a; | Homo sapiens |
| 8350   | histone cluster 2, H3c; histone cluster 2, H3d<br>histone cluster 1, H3j; histone cluster 1, H3i; histone cluster 1, H3h; histone cluster 1, H3g;<br>histone cluster 1, H3f; histone cluster 1, H3e; histone cluster 1, H3d; histone cluster 1, H3c;<br>histone cluster 1, H3b; histone cluster 1, H3a; histone cluster 1, H2ad; histone cluster 2, H3a; | Homo sapiens |
| 8355   | histone cluster 2, H3c; histone cluster 2, H3d<br>histone cluster 1, H3j; histone cluster 1, H3i; histone cluster 1, H3h; histone cluster 1, H3g;<br>histone cluster 1, H3f; histone cluster 1, H3e; histone cluster 1, H3d; histone cluster 1, H3c;<br>histone cluster 1, H3b; histone cluster 1, H3a; histone cluster 1, H2ad; histone cluster 2, H3a; | Homo sapiens |
| 8352   | histone cluster 2, H3c; histone cluster 2, H3d<br>histone cluster 1, H3j; histone cluster 1, H3i; histone cluster 1, H3h; histone cluster 1, H3g;<br>histone cluster 1, H3f; histone cluster 1, H3e; histone cluster 1, H3d; histone cluster 1, H3c;<br>histone cluster 1, H3b; histone cluster 1, H3a; histone cluster 1, H2ad; histone cluster 2, H3a; | Homo sapiens |
| 8353   | histone cluster 2, H3c; histone cluster 2, H3d<br>histone cluster 1, H3j; histone cluster 1, H3i; histone cluster 1, H3h; histone cluster 1, H3g;<br>histone cluster 1, H3f; histone cluster 1, H3e; histone cluster 1, H3d; histone cluster 1, H3c;<br>histone cluster 1, H3b; histone cluster 1, H3a; histone cluster 1, H2ad; histone cluster 2, H3a; | Homo sapiens |
| 8358   | histone cluster 2, H3c; histone cluster 2, H3d<br>histone cluster 1, H3j; histone cluster 1, H3i; histone cluster 1, H3h; histone cluster 1, H3g;<br>histone cluster 1, H3f; histone cluster 1, H3e; histone cluster 1, H3d; histone cluster 1, H3c;<br>histone cluster 1, H3b; histone cluster 1, H3a; histone cluster 1, H2ad; histone cluster 2, H3a; | Homo sapiens |
| 590    | butyrylcholinesterase                                                                                                                                                                                                                                                                                                                                    | Homo sapiens |
| 6695   | sparc/osteonectin, cwcv and kazal-like domains proteoglycan (testican) 1                                                                                                                                                                                                                                                                                 | Homo sapiens |
| 998    | cell division cycle 42 (GTP binding protein, 25kDa); cell division cycle 42 pseudogene 2                                                                                                                                                                                                                                                                 | Homo sapiens |
| 9782   | matrin 3                                                                                                                                                                                                                                                                                                                                                 | Homo sapiens |
| 3704   | inosine triphosphatase (nucleoside triphosphate pyrophosphatase)                                                                                                                                                                                                                                                                                         | Homo sapiens |
| 5747   | PTK2 protein tyrosine kinase 2                                                                                                                                                                                                                                                                                                                           | Homo sapiens |
| 1500   | catenin (cadherin-associated protein), delta 1                                                                                                                                                                                                                                                                                                           | Homo sapiens |
| 526    | ATPase, H+ transporting, lysosomal 56/58kDa, V1 subunit B2                                                                                                                                                                                                                                                                                               | Homo sapiens |
| 6780   | staufen, RNA binding protein, homolog 1 (Drosophila)                                                                                                                                                                                                                                                                                                     | Homo sapiens |
| 29766  | tropomodulin 3 (ubiquitous)                                                                                                                                                                                                                                                                                                                              | Homo sapiens |
| 27122  | dickkopf homolog 3 (Xenopus laevis)                                                                                                                                                                                                                                                                                                                      | Homo sapiens |
| 6923   | transcription elongation factor B (SIII), polypeptide 2 (18kDa, elongin B)                                                                                                                                                                                                                                                                               | Homo sapiens |
| 403    | ADP-ribosylation factor-like 3                                                                                                                                                                                                                                                                                                                           | Homo sapiens |
| 56034  | platelet derived growth factor C                                                                                                                                                                                                                                                                                                                         | Homo sapiens |

|           |                                                                                                                                                                                                              |              |
|-----------|--------------------------------------------------------------------------------------------------------------------------------------------------------------------------------------------------------------|--------------|
| 10539     | glutaredoxin 3                                                                                                                                                                                               | Homo sapiens |
| 7296      | thioredoxin reductase 1; hypothetical LOC100130902                                                                                                                                                           | Homo sapiens |
| 57498     | kinase D-interacting substrate, 220kDa                                                                                                                                                                       | Homo sapiens |
| 10236     | heterogeneous nuclear ribonucleoprotein R                                                                                                                                                                    | Homo sapiens |
| 7040      | transforming growth factor, beta 1                                                                                                                                                                           | Homo sapiens |
| 1266      | calponin 3, acidic                                                                                                                                                                                           | Homo sapiens |
| 8243      | structural maintenance of chromosomes 1A                                                                                                                                                                     | Homo sapiens |
| 8815      | similar to barrier-to-autointegration factor; barrier to autointegration factor 1                                                                                                                            | Homo sapiens |
| 2783      | guanine nucleotide binding protein (G protein), beta polypeptide 2                                                                                                                                           | Homo sapiens |
| 100130624 | ribosomal protein L15 pseudogene 22; ribosomal protein L15 pseudogene 18; ribosomal protein L15 pseudogene 17; ribosomal protein L15 pseudogene 3; ribosomal protein L15 pseudogene 7; ribosomal protein L15 | Homo sapiens |
| 728576    | ribosomal protein L15 pseudogene 22; ribosomal protein L15 pseudogene 18; ribosomal protein L15 pseudogene 17; ribosomal protein L15 pseudogene 3; ribosomal protein L15 pseudogene 7; ribosomal protein L15 | Homo sapiens |
| 653232    | ribosomal protein L15 pseudogene 22; ribosomal protein L15 pseudogene 18; ribosomal protein L15 pseudogene 17; ribosomal protein L15 pseudogene 3; ribosomal protein L15 pseudogene 7; ribosomal protein L15 | Homo sapiens |
| 6138      | ribosomal protein L15 pseudogene 22; ribosomal protein L15 pseudogene 18; ribosomal protein L15 pseudogene 17; ribosomal protein L15 pseudogene 3; ribosomal protein L15 pseudogene 7; ribosomal protein L15 | Homo sapiens |
| 728002    | ribosomal protein L15 pseudogene 22; ribosomal protein L15 pseudogene 18; ribosomal protein L15 pseudogene 17; ribosomal protein L15 pseudogene 3; ribosomal protein L15 pseudogene 7; ribosomal protein L15 | Homo sapiens |
| 728088    | ribosomal protein L15 pseudogene 22; ribosomal protein L15 pseudogene 18; ribosomal protein L15 pseudogene 17; ribosomal protein L15 pseudogene 3; ribosomal protein L15 pseudogene 7; ribosomal protein L15 | Homo sapiens |
| 9897      | KIAA0196                                                                                                                                                                                                     | Homo sapiens |
| 2026      | enolase 2 (gamma, neuronal)                                                                                                                                                                                  | Homo sapiens |
| 2147      | coagulation factor II (thrombin)                                                                                                                                                                             | Homo sapiens |
| 8829      | neuropilin 1                                                                                                                                                                                                 | Homo sapiens |
| 8541      | protein tyrosine phosphatase, receptor type, f polypeptide (PTPRF), interacting protein (liprin), alpha 3                                                                                                    | Homo sapiens |
| 56931     | dihydrouridine synthase 3-like ( <i>S. cerevisiae</i> )                                                                                                                                                      | Homo sapiens |
| 129285    | KLRAQ motif containing 1                                                                                                                                                                                     | Homo sapiens |
| 6038      | ribonuclease, RNase A family, 4                                                                                                                                                                              | Homo sapiens |
| 6176      | ribosomal protein, large, P1                                                                                                                                                                                 | Homo sapiens |
| 22795     | nidogen 2 (osteonidogen)                                                                                                                                                                                     | Homo sapiens |
| 6856      | synaptophysin-like 1                                                                                                                                                                                         | Homo sapiens |
| 309       | annexin A6                                                                                                                                                                                                   | Homo sapiens |
| 5250      | solute carrier family 25 (mitochondrial carrier; phosphate carrier), member 3                                                                                                                                | Homo sapiens |
| 23303     | kinesin family member 13B                                                                                                                                                                                    | Homo sapiens |
| 5649      | reelin                                                                                                                                                                                                       | Homo sapiens |
| 11267     | SNF8, ESCRT-II complex subunit, homolog ( <i>S. cerevisiae</i> )                                                                                                                                             | Homo sapiens |
| 64848     | YTH domain containing 2                                                                                                                                                                                      | Homo sapiens |
| 10424     | progesterone receptor membrane component 2                                                                                                                                                                   | Homo sapiens |
| 3798      | kinesin family member 5A                                                                                                                                                                                     | Homo sapiens |
| 11336     | exocyst complex component 3                                                                                                                                                                                  | Homo sapiens |
| 7162      | trophoblast glycoprotein                                                                                                                                                                                     | Homo sapiens |
| 6125      | ribosomal protein L5 pseudogene 34; ribosomal protein L5 pseudogene 1; ribosomal protein L5                                                                                                                  | Homo sapiens |
| 84861     | kelch-like 22 ( <i>Drosophila</i> )                                                                                                                                                                          | Homo sapiens |
| 3301      | DnaJ (Hsp40) homolog, subfamily A, member 1                                                                                                                                                                  | Homo sapiens |
| 23317     | DnaJ (Hsp40) homolog, subfamily C, member 13                                                                                                                                                                 | Homo sapiens |
| 126133    | aldehyde dehydrogenase 16 family, member A1                                                                                                                                                                  | Homo sapiens |
| 6950      | hypothetical gene supported by BC000665; t-complex 1                                                                                                                                                         | Homo sapiens |
| 3311      | heat shock 70kDa protein 7 (HSP70B); heat shock 70kDa protein 6 (HSP70B')                                                                                                                                    | Homo sapiens |
| 3310      | heat shock 70kDa protein 7 (HSP70B); heat shock 70kDa protein 6 (HSP70B')                                                                                                                                    | Homo sapiens |
| 347733    | tubulin, beta 2B                                                                                                                                                                                             | Homo sapiens |
| 55226     | N-acetyltransferase 10 (GCN5-related)                                                                                                                                                                        | Homo sapiens |
| 51719     | calcium binding protein 39                                                                                                                                                                                   | Homo sapiens |
| 56886     | UDP-glucose ceramide glucosyltransferase-like 1                                                                                                                                                              | Homo sapiens |
| 127281    | chromosome 1 open reading frame 93                                                                                                                                                                           | Homo sapiens |
| 51603     | methyltransferase like 13                                                                                                                                                                                    | Homo sapiens |
| 3945      | lactate dehydrogenase B                                                                                                                                                                                      | Homo sapiens |
| 51692     | cleavage and polyadenylation specific factor 3, 73kDa                                                                                                                                                        | Homo sapiens |
| 5034      | prolyl 4-hydroxylase, beta polypeptide                                                                                                                                                                       | Homo sapiens |
| 7474      | wingless-type MMTV integration site family, member 5A                                                                                                                                                        | Homo sapiens |
| 7174      | tripeptidyl peptidase II                                                                                                                                                                                     | Homo sapiens |
| 3676      | integrin, alpha 4 (antigen CD49D, alpha 4 subunit of VLA-4 receptor)                                                                                                                                         | Homo sapiens |
| 23384     | cytospin A                                                                                                                                                                                                   | Homo sapiens |
| 7163      | tumor protein D52                                                                                                                                                                                            | Homo sapiens |
| 5500      | protein phosphatase 1, catalytic subunit, beta isoform; speedy homolog A ( <i>Xenopus laevis</i> )                                                                                                           | Homo sapiens |
| 79026     | AHNAK nucleoprotein                                                                                                                                                                                          | Homo sapiens |
| 80146     | UDP-glucuronate decarboxylase 1                                                                                                                                                                              | Homo sapiens |
| 22872     | SEC31 homolog A ( <i>S. cerevisiae</i> )                                                                                                                                                                     | Homo sapiens |
| 7295      | thioredoxin                                                                                                                                                                                                  | Homo sapiens |
| 48        | aconitase 1, soluble                                                                                                                                                                                         | Homo sapiens |
| 10808     | heat shock 105kDa/110kDa protein 1                                                                                                                                                                           | Homo sapiens |
| 6229      | ribosomal protein S24                                                                                                                                                                                        | Homo sapiens |
| 6137      | ribosomal protein L13 pseudogene 12; ribosomal protein L13                                                                                                                                                   | Homo sapiens |
| 8520      | histone acetyltransferase 1                                                                                                                                                                                  | Homo sapiens |
| 10973     | activating signal cointegrator 1 complex subunit 3                                                                                                                                                           | Homo sapiens |
| 5858      | pregnancy-zone protein                                                                                                                                                                                       | Homo sapiens |
| 84932     | RAB2B, member RAS oncogene family                                                                                                                                                                            | Homo sapiens |
| 5434      | polymerase (RNA) II (DNA directed) polypeptide E, 25kDa                                                                                                                                                      | Homo sapiens |

|        |                                                                                                      |              |
|--------|------------------------------------------------------------------------------------------------------|--------------|
| 56893  | ubiquilin 4                                                                                          | Homo sapiens |
| 9136   | ribosomal RNA processing 9, small subunit (SSU) processome component, homolog (yeast)                | Homo sapiens |
| 6513   | solute carrier family 2 (facilitated glucose transporter), member 1                                  | Homo sapiens |
| 79830  | zinc finger, MYM-type 1                                                                              | Homo sapiens |
| 4627   | myosin, heavy chain 9, non-muscle                                                                    | Homo sapiens |
| 5725   | polypyrimidine tract binding protein 1                                                               | Homo sapiens |
| 55210  | ATPase family, AAA domain containing 3A                                                              | Homo sapiens |
| 303    | annexin A2 pseudogene 3; annexin A2; annexin A2 pseudogene 1                                         | Homo sapiens |
| 302    | annexin A2 pseudogene 3; annexin A2; annexin A2 pseudogene 1                                         | Homo sapiens |
| 26354  | guanine nucleotide binding protein-like 3 (nucleolar)                                                | Homo sapiens |
| 5213   | phosphofructokinase, muscle                                                                          | Homo sapiens |
| 156    | adrenergic, beta, receptor kinase 1                                                                  | Homo sapiens |
| 4035   | low density lipoprotein-related protein 1 (alpha-2-macroglobulin receptor)                           | Homo sapiens |
| 9669   | eukaryotic translation initiation factor 5B                                                          | Homo sapiens |
| 29110  | TANK-binding kinase 1                                                                                | Homo sapiens |
| 8732   | RNA guanylyltransferase and 5'-phosphatase                                                           | Homo sapiens |
| 5636   | phosphoribosyl pyrophosphate synthetase-associated protein 2                                         | Homo sapiens |
| 5631   | phosphoribosyl pyrophosphate synthetase 1; phosphoribosyl pyrophosphate synthetase 1-like 1          | Homo sapiens |
| 221823 | phosphoribosyl pyrophosphate synthetase 1; phosphoribosyl pyrophosphate synthetase 1-like 1          | Homo sapiens |
| 3250   | haptoglobin-related protein; haptoglobin                                                             | Homo sapiens |
| 3240   | haptoglobin-related protein; haptoglobin                                                             | Homo sapiens |
| 80124  | valosin containing protein (p97)/p47 complex interacting protein 1                                   | Homo sapiens |
| 3728   | junction plakoglobin                                                                                 | Homo sapiens |
| 128239 | IQ motif containing GTPase activating protein 3                                                      | Homo sapiens |
| 3673   | integrin, alpha 2 (CD49B, alpha 2 subunit of VLA-2 receptor)                                         | Homo sapiens |
| 80210  | armadillo repeat containing 9                                                                        | Homo sapiens |
| 6652   | sorbitol dehydrogenase                                                                               | Homo sapiens |
| 22934  | ribose 5-phosphate isomerase A                                                                       | Homo sapiens |
| 2762   | GDP-mannose 4,6-dehydratase                                                                          | Homo sapiens |
| 28952  | coiled-coil domain containing 22                                                                     | Homo sapiens |
| 5716   | proteasome (prosome, macropain) 26S subunit, non-ATPase, 10                                          | Homo sapiens |
| 140465 | myosin, light chain 6B, alkali, smooth muscle and non-muscle                                         | Homo sapiens |
| 378    | ADP-ribosylation factor 4                                                                            | Homo sapiens |
| 83700  | junctional adhesion molecule 3                                                                       | Homo sapiens |
| 84498  | family with sequence similarity 120B                                                                 | Homo sapiens |
| 4670   | heterogeneous nuclear ribonucleoprotein M                                                            | Homo sapiens |
| 1665   | DEAH (Asp-Glu-Ala-His) box polypeptide 15                                                            | Homo sapiens |
| 29128  | ubiquitin-like with PHD and ring finger domains 1                                                    | Homo sapiens |
| 8065   | cullin 5                                                                                             | Homo sapiens |
| 8452   | cullin 3                                                                                             | Homo sapiens |
| 476    | ATPase, Na+/K+ transporting, alpha 1 polypeptide                                                     | Homo sapiens |
| 1656   | DEAD (Asp-Glu-Ala-Asp) box polypeptide 6                                                             | Homo sapiens |
| 2023   | enolase 1, (alpha)                                                                                   | Homo sapiens |
| 64359  | nucleoredoxin                                                                                        | Homo sapiens |
| 3321   | immunoglobulin superfamily, member 3                                                                 | Homo sapiens |
| 3191   | similar to heterogeneous nuclear ribonucleoprotein L-like; heterogeneous nuclear ribonucleoprotein L | Homo sapiens |
| 5129   | PCTAIRE protein kinase 3                                                                             | Homo sapiens |
| 93973  | ARF8 actin-related protein 8 homolog (yeast)                                                         | Homo sapiens |
| 7414   | vinculin                                                                                             | Homo sapiens |
| 9276   | coatomer protein complex, subunit beta 2 (beta prime)                                                | Homo sapiens |
| 11344  | twinfilin, actin-binding protein, homolog 2 (Drosophila)                                             | Homo sapiens |
| 10574  | chaperonin containing TC1P1, subunit 7 (eta)                                                         | Homo sapiens |
| 8836   | gamma-glutamyl hydrolase (conjugase, folylpolyglutaminyl hydrolase)                                  | Homo sapiens |
| 306    | annexin A3                                                                                           | Homo sapiens |
| 283742 | family with sequence similarity 98, member B                                                         | Homo sapiens |
| 5898   | v-ral simian leukemia viral oncogene homolog A (ras related)                                         | Homo sapiens |
| 1967   | eukaryotic translation initiation factor 2B, subunit 1 alpha, 26kDa                                  | Homo sapiens |
| 5471   | phosphoribosyl pyrophosphate amidotransferase                                                        | Homo sapiens |
| 9477   | mediator complex subunit 20                                                                          | Homo sapiens |
| 1605   | dystroglycan 1 (dystrophin-associated glycoprotein 1)                                                | Homo sapiens |
| 8697   | cell division cycle 23 homolog (S. cerevisiae)                                                       | Homo sapiens |
| 83743  | glutamate-rich WD repeat containing 1                                                                | Homo sapiens |
| 1471   | cystatin C                                                                                           | Homo sapiens |
| 5648   | mannan-binding lectin serine peptidase 1 (C4/C2 activating component of Ra-reactive factor)          | Homo sapiens |
| 7314   | ubiquitin B                                                                                          | Homo sapiens |
| 65263  | pyrroline-5-carboxylate reductase-like                                                               | Homo sapiens |
| 87     | actinin, alpha 1                                                                                     | Homo sapiens |
| 5711   | proteasome (prosome, macropain) 26S subunit, non-ATPase, 5                                           | Homo sapiens |
| 55379  | leucine rich repeat containing 59                                                                    | Homo sapiens |
| 5577   | protein kinase, cAMP-dependent, regulatory, type II, beta                                            | Homo sapiens |
| 908    | chaperonin containing TC1P1, subunit 6A (zeta 1)                                                     | Homo sapiens |
| 11060  | WW domain containing E3 ubiquitin protein ligase 2                                                   | Homo sapiens |
| 22870  | SAPS domain family, member 1                                                                         | Homo sapiens |
| 8078   | ubiquitin specific peptidase 5 (isopeptidase T)                                                      | Homo sapiens |
| 9847   | KIAA0528                                                                                             | Homo sapiens |
| 54862  | coiled-coil and C2 domain containing 1A                                                              | Homo sapiens |
| 55823  | vacuolar protein sorting 11 homolog (S. cerevisiae)                                                  | Homo sapiens |
| 114793 | formin-like 2                                                                                        | Homo sapiens |
| 63892  | thyroid adenoma associated                                                                           | Homo sapiens |
| 9733   | squamous cell carcinoma antigen recognized by T cells 3                                              | Homo sapiens |
| 157769 | family with sequence similarity 91, member A1                                                        | Homo sapiens |
| 11059  | WW domain containing E3 ubiquitin protein ligase 1                                                   | Homo sapiens |
| 51479  | ankyrin repeat and FYVE domain containing 1                                                          | Homo sapiens |
| 4673   | nucleosome assembly protein 1-like 1                                                                 | Homo sapiens |
| 8406   | sushi-repeat-containing protein, X-linked                                                            | Homo sapiens |



|           |                                                                                                       |              |
|-----------|-------------------------------------------------------------------------------------------------------|--------------|
| 25978     | chromatin modifying protein 2B                                                                        | Homo sapiens |
| 8573      | calcium/calmodulin-dependent serine protein kinase (MAGUK family)                                     | Homo sapiens |
| 1284      | collagen, type IV, alpha 2                                                                            | Homo sapiens |
| 9380      | glyoxylate reductase/hydroxypyruvate reductase                                                        | Homo sapiens |
| 7184      | heat shock protein 90kDa beta (Grp94), member 1                                                       | Homo sapiens |
| 100133211 | related RAS viral (r-ras) oncogene homolog 2; similar to related RAS viral (r-ras) oncogene homolog 2 | Homo sapiens |
| 22800     | related RAS viral (r-ras) oncogene homolog 2; similar to related RAS viral (r-ras) oncogene homolog 2 | Homo sapiens |
| 5912      | RAP2B, member of RAS oncogene family                                                                  | Homo sapiens |
| 1719      | dihydrofolate reductase                                                                               | Homo sapiens |
| 26135     | SERPINE1 mRNA binding protein 1                                                                       | Homo sapiens |
| 25998     | inhibitor of Bruton agammaglobulinemia tyrosine kinase                                                | Homo sapiens |
| 642       | bleomycin hydrolase                                                                                   | Homo sapiens |
| 8724      | sorting nexin 3                                                                                       | Homo sapiens |
| 23218     | neurobeachin-like 2                                                                                   | Homo sapiens |
| 57488     | family with sequence similarity 62 (C2 domain containing), member B                                   | Homo sapiens |
| 4809      | NHP2 non-histone chromosome protein 2-like 1 ( <i>S. cerevisiae</i> )                                 | Homo sapiens |
| 27293     | sphingomyelin phosphodiesterase, acid-like 3B                                                         | Homo sapiens |
| 5336      | phospholipase C, gamma 2 (phosphatidylinositol-specific)                                              | Homo sapiens |
| 5476      | cathepsin A                                                                                           | Homo sapiens |
| 1939      | ligatin                                                                                               | Homo sapiens |
| 3276      | protein arginine methyltransferase 1                                                                  | Homo sapiens |
| 29968     | chromosome 8 open reading frame 62; phosphoserine aminotransferase 1                                  | Homo sapiens |
| 2801      | golgi autoantigen, golgin subfamily a, 2                                                              | Homo sapiens |
| 9097      | ubiquitin specific peptidase 14 (tRNA-guanine transglycosylase)                                       | Homo sapiens |
| 10184     | lipoma HMGIC fusion partner-like 2                                                                    | Homo sapiens |
| 25930     | protein tyrosine phosphatase, non-receptor type 23                                                    | Homo sapiens |
| 51571     | family with sequence similarity 49, member B                                                          | Homo sapiens |
| 65264     | ubiquitin-conjugating enzyme E2Z                                                                      | Homo sapiens |
| 471       | 5-aminoimidazole-4-carboxamide ribonucleotide formyltransferase/IMP cyclohydrolase                    | Homo sapiens |
| 4905      | N-ethylmaleimide-sensitive factor                                                                     | Homo sapiens |
| 5298      | phosphatidylinositol 4-kinase, catalytic, beta                                                        | Homo sapiens |
| 9646      | Ctr9, Paf1/RNA polymerase II complex component, homolog ( <i>S. cerevisiae</i> )                      | Homo sapiens |
| 6194      | ribosomal protein S6 pseudogene 25; ribosomal protein S6; ribosomal protein S6 pseudogene 1           | Homo sapiens |
| 8546      | adaptor-related protein complex 3, beta 1 subunit                                                     | Homo sapiens |
| 22820     | coatamer protein complex, subunit gamma                                                               | Homo sapiens |
| 6714      | v-src sarcoma (Schmidt-Ruppin A-2) viral oncogene homolog (avian)                                     | Homo sapiens |
| 4218      | RAB8A, member RAS oncogene family                                                                     | Homo sapiens |
| 10465     | peptidylprolyl isomerase H (cyclophilin H)                                                            | Homo sapiens |
| 25801     | grancalcin, EF-hand calcium binding protein                                                           | Homo sapiens |
| 10935     | peroxiredoxin 3                                                                                       | Homo sapiens |
| 27243     | chromatin modifying protein 2A                                                                        | Homo sapiens |
| 9933      | KIAA0020                                                                                              | Homo sapiens |
| 23266     | latrophilin 2                                                                                         | Homo sapiens |
| 10592     | structural maintenance of chromosomes 2                                                               | Homo sapiens |
| 1314      | coatamer protein complex, subunit alpha                                                               | Homo sapiens |
| 2107      | eukaryotic translation termination factor 1                                                           | Homo sapiens |
| 4191      | malate dehydrogenase 2, NAD (mitochondrial)                                                           | Homo sapiens |
| 6251      | Ras suppressor protein 1                                                                              | Homo sapiens |
| 55862     | enoyl Coenzyme A hydratase domain containing 1                                                        | Homo sapiens |
| 3614      | IMP (inosine monophosphate) dehydrogenase 1                                                           | Homo sapiens |
| 51138     | COP9 constitutive photomorphogenic homolog subunit 4 ( <i>Arabidopsis</i> )                           | Homo sapiens |
| 8453      | cullin 2                                                                                              | Homo sapiens |
| 80895     | integrin-linked kinase-associated serine/threonine phosphatase 2C                                     | Homo sapiens |
| 6829      | suppressor of Ty 5 homolog ( <i>S. cerevisiae</i> )                                                   | Homo sapiens |
| 1947      | ephrin-B1                                                                                             | Homo sapiens |
| 25921     | zinc finger, DHHC-type containing 5                                                                   | Homo sapiens |
| 10785     | WD repeat domain 4                                                                                    | Homo sapiens |
| 5303      | protein (peptidylprolyl cis/trans isomerase) NIMA-interacting, 4 (parvulin)                           | Homo sapiens |
| 9958      | ubiquitin specific peptidase 15                                                                       | Homo sapiens |
| 6432      | splicing factor, arginine/serine-rich 7, 35kDa                                                        | Homo sapiens |
| 6188      | ribosomal protein S3 pseudogene 3; ribosomal protein S3                                               | Homo sapiens |
| 440991    | ribosomal protein S3 pseudogene 3; ribosomal protein S3                                               | Homo sapiens |
| 30844     | EH-domain containing 4                                                                                | Homo sapiens |
| 6598      | SWI/SNF related, matrix associated, actin dependent regulator of chromatin, subfamily b, member 1     | Homo sapiens |
| 7082      | tight junction protein 1 (zona occludens 1)                                                           | Homo sapiens |
| 2870      | G protein-coupled receptor kinase 6                                                                   | Homo sapiens |
| 26173     | integrator complex subunit 1                                                                          | Homo sapiens |
| 11098     | protease, serine, 23                                                                                  | Homo sapiens |
| 23020     | similar to U5 snRNP-specific protein, 200 kDa; small nuclear ribonucleoprotein 200kDa (U5)            | Homo sapiens |
| 79837     | phosphatidylinositol-5-phosphate 4-kinase, type II, gamma                                             | Homo sapiens |
| 51377     | ubiquitin carboxyl-terminal hydrolase L5                                                              | Homo sapiens |
| 85369     | family with sequence similarity 40, member A                                                          | Homo sapiens |
| 6732      | SFRS protein kinase 1                                                                                 | Homo sapiens |
| 55236     | ubiquitin-like modifier activating enzyme 6                                                           | Homo sapiens |
| 4363      | ATP-binding cassette, sub-family C (CFTR/MRP), member 1                                               | Homo sapiens |
| 3949      | low density lipoprotein receptor                                                                      | Homo sapiens |
| 83548     | component of oligomeric golgi complex 3                                                               | Homo sapiens |
| 5329      | plasminogen activator, urokinase receptor                                                             | Homo sapiens |
| 335       | apolipoprotein A-I                                                                                    | Homo sapiens |
| 3157      | 3-hydroxy-3-methylglutaryl-Coenzyme A synthase 1 (soluble)                                            | Homo sapiens |
| 7087      | intercellular adhesion molecule 5, telencephalin                                                      | Homo sapiens |
| 8301      | phosphatidylinositol binding clathrin assembly protein                                                | Homo sapiens |
| 1303      | collagen, type XII, alpha 1                                                                           | Homo sapiens |

|           |                                                                                                                                                                                                                                                   |              |
|-----------|---------------------------------------------------------------------------------------------------------------------------------------------------------------------------------------------------------------------------------------------------|--------------|
| 214       | hypothetical protein LOC100133690; activated leukocyte cell adhesion molecule                                                                                                                                                                     | Homo sapiens |
| 8086      | achalasia, adrenocortical insufficiency, alacrimia (Allgrove, triple-A)                                                                                                                                                                           | Homo sapiens |
| 9410      | small nuclear ribonucleoprotein 40kDa (U5)                                                                                                                                                                                                        | Homo sapiens |
| 56850     | GRIPI associated protein 1                                                                                                                                                                                                                        | Homo sapiens |
| 159       | adenylosuccinate synthase                                                                                                                                                                                                                         | Homo sapiens |
| 51143     | dynein, cytoplasmic 1, light intermediate chain 1                                                                                                                                                                                                 | Homo sapiens |
| 55604     | leucine rich repeat containing 16A                                                                                                                                                                                                                | Homo sapiens |
| 55605     | kinesin family member 21A                                                                                                                                                                                                                         | Homo sapiens |
| 7035      | tissue factor pathway inhibitor (lipoprotein-associated coagulation inhibitor)                                                                                                                                                                    | Homo sapiens |
| 1277      | collagen, type I, alpha 1                                                                                                                                                                                                                         | Homo sapiens |
| 84888     | signal peptide peptidase-like 2A                                                                                                                                                                                                                  | Homo sapiens |
| 3939      | lactate dehydrogenase A                                                                                                                                                                                                                           | Homo sapiens |
| 2135      | exostoses (multiple)-like 2                                                                                                                                                                                                                       | Homo sapiens |
| 1956      | epidermal growth factor receptor (erythroblastic leukemia viral (v-erb-b) oncogene homolog, avian)                                                                                                                                                | Homo sapiens |
| 2521      | fusion (involved in t(12;16) in malignant liposarcoma)                                                                                                                                                                                            | Homo sapiens |
| 10120     | ARPI actin-related protein 1 homolog B, centractin beta (yeast)                                                                                                                                                                                   | Homo sapiens |
| 6472      | serine hydroxymethyltransferase 2 (mitochondrial)                                                                                                                                                                                                 | Homo sapiens |
| 9209      | leucine rich repeat (in FLII) interacting protein 2                                                                                                                                                                                               | Homo sapiens |
| 444       | aspartate beta-hydroxylase                                                                                                                                                                                                                        | Homo sapiens |
| 3315      | heat shock 27kDa protein-like 2 pseudogene; heat shock 27kDa protein 1                                                                                                                                                                            | Homo sapiens |
| 653553    | heat shock 27kDa protein-like 2 pseudogene; heat shock 27kDa protein 1                                                                                                                                                                            | Homo sapiens |
| 10380     | 3' (2'), 5'-bisphosphate nucleotidase 1                                                                                                                                                                                                           | Homo sapiens |
| 64423     | inverted formin, FH2 and WH2 domain containing                                                                                                                                                                                                    | Homo sapiens |
| 6156      | ribosomal protein L30                                                                                                                                                                                                                             | Homo sapiens |
| 3480      | insulin-like growth factor 1 receptor                                                                                                                                                                                                             | Homo sapiens |
| 6227      | ribosomal protein S21                                                                                                                                                                                                                             | Homo sapiens |
| 55752     | septin 11                                                                                                                                                                                                                                         | Homo sapiens |
| 2739      | glyoxalase I                                                                                                                                                                                                                                      | Homo sapiens |
| 3842      | transportin 1                                                                                                                                                                                                                                     | Homo sapiens |
| 55937     | apolipoprotein M                                                                                                                                                                                                                                  | Homo sapiens |
| 4282      | macrophage migration inhibitory factor (glycosylation-inhibiting factor)                                                                                                                                                                          | Homo sapiens |
| 6430      | splicing factor, arginine/serine-rich 5                                                                                                                                                                                                           | Homo sapiens |
| 4090      | SMAD family member 5                                                                                                                                                                                                                              | Homo sapiens |
| 2782      | guanine nucleotide binding protein (G protein), beta polypeptide 1                                                                                                                                                                                | Homo sapiens |
| 57826     | RAP2C, member of RAS oncogene family                                                                                                                                                                                                              | Homo sapiens |
| 30849     | phosphoinositide-3-kinase, regulatory subunit 4                                                                                                                                                                                                   | Homo sapiens |
| 5984      | replication factor C (activator 1) 4, 37kDa                                                                                                                                                                                                       | Homo sapiens |
| 64855     | family with sequence similarity 129, member B                                                                                                                                                                                                     | Homo sapiens |
| 256364    | echinoderm microtubule associated protein like 3                                                                                                                                                                                                  | Homo sapiens |
| 5589      | protein kinase C substrate 80K-H                                                                                                                                                                                                                  | Homo sapiens |
| 29894     | cleavage and polyadenylation specific factor 1, 160kDa                                                                                                                                                                                            | Homo sapiens |
| 3070      | helicase, lymphoid-specific                                                                                                                                                                                                                       | Homo sapiens |
| 23385     | nicastrin                                                                                                                                                                                                                                         | Homo sapiens |
| 26263     | FBX022 opposite strand (non-protein coding); F-box protein 22                                                                                                                                                                                     | Homo sapiens |
| 274       | bridging integrator 1                                                                                                                                                                                                                             | Homo sapiens |
| 6731      | signal recognition particle 72kDa                                                                                                                                                                                                                 | Homo sapiens |
| 9373      | phospholipase A2-activating protein                                                                                                                                                                                                               | Homo sapiens |
| 9991      | ROD1 regulator of differentiation 1 (S. pombe)                                                                                                                                                                                                    | Homo sapiens |
| 28989     | methyltransferase like 11A                                                                                                                                                                                                                        | Homo sapiens |
| 8893      | eukaryotic translation initiation factor 2B, subunit 5 epsilon, 82kDa                                                                                                                                                                             | Homo sapiens |
| 823       | calpain 1, (mu/I) large subunit                                                                                                                                                                                                                   | Homo sapiens |
| 8087      | fragile X mental retardation, autosomal homolog 1                                                                                                                                                                                                 | Homo sapiens |
| 23358     | ubiquitin specific peptidase 24                                                                                                                                                                                                                   | Homo sapiens |
| 400389    | ribosomal protein L12 pseudogene 2; ribosomal protein L12 pseudogene 32; ribosomal protein L12 pseudogene 35; ribosomal protein L12 pseudogene 19; ribosomal protein L12 pseudogene 6; ribosomal protein L12; ribosomal protein L12 pseudogene 14 | Homo sapiens |
| 440176    | ribosomal protein L12 pseudogene 2; ribosomal protein L12 pseudogene 32; ribosomal protein L12 pseudogene 35; ribosomal protein L12 pseudogene 19; ribosomal protein L12 pseudogene 6; ribosomal protein L12; ribosomal protein L12 pseudogene 14 | Homo sapiens |
| 6136      | ribosomal protein L12 pseudogene 2; ribosomal protein L12 pseudogene 32; ribosomal protein L12 pseudogene 35; ribosomal protein L12 pseudogene 19; ribosomal protein L12 pseudogene 6; ribosomal protein L12; ribosomal protein L12 pseudogene 14 | Homo sapiens |
| 646875    | ribosomal protein L12 pseudogene 2; ribosomal protein L12 pseudogene 32; ribosomal protein L12 pseudogene 35; ribosomal protein L12 pseudogene 19; ribosomal protein L12 pseudogene 6; ribosomal protein L12; ribosomal protein L12 pseudogene 14 | Homo sapiens |
| 100129982 | ribosomal protein L12 pseudogene 2; ribosomal protein L12 pseudogene 32; ribosomal protein L12 pseudogene 35; ribosomal protein L12 pseudogene 19; ribosomal protein L12 pseudogene 6; ribosomal protein L12; ribosomal protein L12 pseudogene 14 | Homo sapiens |
| 729500    | ribosomal protein L12 pseudogene 2; ribosomal protein L12 pseudogene 32; ribosomal protein L12 pseudogene 35; ribosomal protein L12 pseudogene 19; ribosomal protein L12 pseudogene 6; ribosomal protein L12; ribosomal protein L12 pseudogene 14 | Homo sapiens |
| 100132795 | ribosomal protein L12 pseudogene 2; ribosomal protein L12 pseudogene 32; ribosomal protein L12 pseudogene 35; ribosomal protein L12 pseudogene 19; ribosomal protein L12 pseudogene 6; ribosomal protein L12; ribosomal protein L12 pseudogene 14 | Homo sapiens |
| 10591     | chromosome 6 open reading frame 108                                                                                                                                                                                                               | Homo sapiens |
| 2956      | mutS homolog 6 (E. coli)                                                                                                                                                                                                                          | Homo sapiens |
| 55915     | LanC lantibiotic synthetase component C-like 2 (bacterial)                                                                                                                                                                                        | Homo sapiens |
| 9145      | synaptogyrin 1                                                                                                                                                                                                                                    | Homo sapiens |
| 9183      | ZW10, kinetochore associated, homolog (Drosophila)                                                                                                                                                                                                | Homo sapiens |
| 10493     | vesicle amine transport protein 1 homolog (T. californica)                                                                                                                                                                                        | Homo sapiens |
| 8775      | N-ethylmaleimide-sensitive factor attachment protein, alpha                                                                                                                                                                                       | Homo sapiens |
| 4437      | mutS homolog 3 (E. coli)                                                                                                                                                                                                                          | Homo sapiens |
| 10128     | leucine-rich PPR-motif containing                                                                                                                                                                                                                 | Homo sapiens |
| 1312      | catechol-O-methyltransferase                                                                                                                                                                                                                      | Homo sapiens |

|       |                                                                                                                                    |              |
|-------|------------------------------------------------------------------------------------------------------------------------------------|--------------|
| 6428  | splicing factor, arginine/serine-rich 3                                                                                            | Homo sapiens |
| 7532  | tyrosine 3-monooxygenase/tryptophan 5-monooxygenase activation protein, gamma polypeptide                                          | Homo sapiens |
| 7534  | tyrosine 3-monooxygenase/tryptophan 5-monooxygenase activation protein, zeta polypeptide                                           | Homo sapiens |
| 6206  | ribosomal protein S12; ribosomal protein S12 pseudogene 4; ribosomal protein S12 pseudogene 11; ribosomal protein S12 pseudogene 9 | Homo sapiens |
| 10617 | STAM binding protein                                                                                                               | Homo sapiens |
| 7203  | chaperonin containing TCP1, subunit 3 (gamma)                                                                                      | Homo sapiens |
| 29789 | Obg-like ATPase 1                                                                                                                  | Homo sapiens |
| 9984  | THO complex 1                                                                                                                      | Homo sapiens |
| 50814 | NAD(P) dependent steroid dehydrogenase-like                                                                                        | Homo sapiens |
| 1808  | dihydropyrimidinase-like 2                                                                                                         | Homo sapiens |
| 3189  | heterogeneous nuclear ribonucleoprotein H3 (2H9)                                                                                   | Homo sapiens |
| 10654 | phosphomevalonate kinase                                                                                                           | Homo sapiens |
| 54832 | vacuolar protein sorting 13 homolog C (S. cerevisiae)                                                                              | Homo sapiens |
| 6396  | SEC13 homolog (S. cerevisiae)                                                                                                      | Homo sapiens |
| 10082 | glypican 6                                                                                                                         | Homo sapiens |
| 10492 | synaptotagmin binding, cytoplasmic RNA interacting protein                                                                         | Homo sapiens |
| 5066  | peptidylglycine alpha-amidating monooxygenase                                                                                      | Homo sapiens |
| 10171 | RNA terminal phosphate cyclase-like 1                                                                                              | Homo sapiens |
| 1965  | eukaryotic translation initiation factor 2, subunit 1 alpha, 35kDa                                                                 | Homo sapiens |
| 55048 | vacuolar protein sorting 37 homolog C (S. cerevisiae)                                                                              | Homo sapiens |
| 2776  | guanine nucleotide binding protein (G protein), q polypeptide                                                                      | Homo sapiens |
| 54520 | coiled-coil domain containing 93                                                                                                   | Homo sapiens |
| 3927  | LIM and SH3 protein 1                                                                                                              | Homo sapiens |
| 65985 | acetoacetyl-CoA synthetase                                                                                                         | Homo sapiens |
| 79585 | coronin 7                                                                                                                          | Homo sapiens |
| 55890 | G protein-coupled receptor, family C, group 5, member C                                                                            | Homo sapiens |
| 10381 | tubulin, beta 3; melanocortin 1 receptor (alpha melanocyte stimulating hormone receptor)                                           | Homo sapiens |
| 4157  | tubulin, beta 3; melanocortin 1 receptor (alpha melanocyte stimulating hormone receptor)                                           | Homo sapiens |
| 10342 | TRK-fused gene                                                                                                                     | Homo sapiens |
| 5257  | phosphorylase kinase, beta                                                                                                         | Homo sapiens |
| 57085 | angiotensin II receptor-associated protein                                                                                         | Homo sapiens |
| 5695  | proteasome (prosome, macropain) subunit, beta type, 7                                                                              | Homo sapiens |
| 83692 | CD99 molecule-like 2                                                                                                               | Homo sapiens |
| 161   | adaptor-related protein complex 2, alpha 2 subunit                                                                                 | Homo sapiens |
| 5604  | mitogen-activated protein kinase kinase 1                                                                                          | Homo sapiens |
| 23191 | cytoplasmic FMR1 interacting protein 1                                                                                             | Homo sapiens |
| 1512  | cathepsin H                                                                                                                        | Homo sapiens |
| 164   | adaptor-related protein complex 1, gamma 1 subunit                                                                                 | Homo sapiens |
| 29882 | anaphase promoting complex subunit 2                                                                                               | Homo sapiens |
| 6738  | TROVE domain family, member 2                                                                                                      | Homo sapiens |
| 4059  | basal cell adhesion molecule (Lutheran blood group)                                                                                | Homo sapiens |
| 644   | biliverdin reductase A                                                                                                             | Homo sapiens |
| 10427 | SEC24 family, member B (S. cerevisiae)                                                                                             | Homo sapiens |
| 10940 | processing of precursor 1, ribonuclease P/MRP subunit (S. cerevisiae)                                                              | Homo sapiens |
| 5209  | 6-phosphofructo-2-kinase/fructose-2,6-biphosphatase 3                                                                              | Homo sapiens |
| 4357  | mercaptopyruvate sulfurtransferase                                                                                                 | Homo sapiens |
| 8335  | histone cluster 1, H2ae; histone cluster 1, H2ab                                                                                   | Homo sapiens |
| 3012  | histone cluster 1, H2ae; histone cluster 1, H2ab                                                                                   | Homo sapiens |
| 23327 | neural precursor cell expressed, developmentally down-regulated 4-like                                                             | Homo sapiens |
| 6152  | ribosomal protein L24; ribosomal protein L24 pseudogene 6                                                                          | Homo sapiens |
| 4642  | myosin ID                                                                                                                          | Homo sapiens |
| 79707 | nucleolar protein 9                                                                                                                | Homo sapiens |
| 22919 | microtubule-associated protein, RP/EB family, member 1                                                                             | Homo sapiens |
| 23555 | tetraspanin 15                                                                                                                     | Homo sapiens |
| 94081 | sideroflexin 1                                                                                                                     | Homo sapiens |
| 27316 | similar to RNA binding motif protein, X-linked; similar to hCG2011544; RNA binding motif protein, X-linked                         | Homo sapiens |
| 55748 | CNDP dipeptidase 2 (metallopeptidase M20 family)                                                                                   | Homo sapiens |
| 9555  | H2A histone family, member Y                                                                                                       | Homo sapiens |
| 26060 | adaptor protein, phosphotyrosine interaction, PH domain and leucine zipper containing 1                                            | Homo sapiens |
| 10643 | insulin-like growth factor 2 mRNA binding protein 3                                                                                | Homo sapiens |
| 427   | N-acylsphingosine amidohydrolase (acid ceramidase) 1                                                                               | Homo sapiens |
| 26278 | spastic ataxia of Charlevoix-Saguenay (sacsin)                                                                                     | Homo sapiens |
| 5537  | protein phosphatase 6, catalytic subunit                                                                                           | Homo sapiens |
| 93343 | family with sequence similarity 125, member A                                                                                      | Homo sapiens |
| 10735 | stromal antigen 2                                                                                                                  | Homo sapiens |
| 1515  | cathepsin L2                                                                                                                       | Homo sapiens |
| 2108  | electron-transfer-flavoprotein, alpha polypeptide                                                                                  | Homo sapiens |
| 23339 | vacuolar protein sorting 39 homolog (S. cerevisiae)                                                                                | Homo sapiens |
| 5819  | poliovirus receptor-related 2 (herpesvirus entry mediator B)                                                                       | Homo sapiens |
| 5530  | protein phosphatase 3 (formerly 2B), catalytic subunit, alpha isoform                                                              | Homo sapiens |
| 3672  | integrin, alpha 1                                                                                                                  | Homo sapiens |
| 10458 | BAL1-associated protein 2                                                                                                          | Homo sapiens |
| 3187  | heterogeneous nuclear ribonucleoprotein H1 (H)                                                                                     | Homo sapiens |
| 64223 | MTOR associated protein, LST8 homolog (S. cerevisiae)                                                                              | Homo sapiens |
| 6603  | SWI/SNF related, matrix associated, actin dependent regulator of chromatin, subfamily d, member 2                                  | Homo sapiens |
| 1977  | eukaryotic translation initiation factor 4E; similar to hCG1777996; similar to eukaryotic translation initiation factor 4E         | Homo sapiens |
| 2194  | fatty acid synthase                                                                                                                | Homo sapiens |
| 989   | septin 7                                                                                                                           | Homo sapiens |
| 6812  | syntaxin binding protein 1                                                                                                         | Homo sapiens |
| 8754  | ADAM metallopeptidase domain 9 (meltrin gamma)                                                                                     | Homo sapiens |
| 6729  | similar to signal recognition particle 54kDa; signal recognition particle 54kDa                                                    | Homo sapiens |
| 26958 | coatamer protein complex, subunit gamma 2                                                                                          | Homo sapiens |

|        |                                                                                                                                                                                                                                                                                                                                                        |              |
|--------|--------------------------------------------------------------------------------------------------------------------------------------------------------------------------------------------------------------------------------------------------------------------------------------------------------------------------------------------------------|--------------|
| 7155   | topoisomerase (DNA) II beta 180kDa                                                                                                                                                                                                                                                                                                                     | Homo sapiens |
| 7076   | TIMP metalloproteinase inhibitor 1                                                                                                                                                                                                                                                                                                                     | Homo sapiens |
| 27229  | tubulin, gamma complex associated protein 4                                                                                                                                                                                                                                                                                                            | Homo sapiens |
| 1213   | clathrin, heavy chain (Hc)                                                                                                                                                                                                                                                                                                                             | Homo sapiens |
| 10521  | DEAD (Asp-Glu-Ala-Asp) box polypeptide 17                                                                                                                                                                                                                                                                                                              | Homo sapiens |
| 4038   | low density lipoprotein receptor-related protein 4                                                                                                                                                                                                                                                                                                     | Homo sapiens |
| 388524 | ribosomal protein SA pseudogene 9; ribosomal protein SA pseudogene 8; ribosomal protein SA pseudogene 58; ribosomal protein SA pseudogene 19; ribosomal protein SA pseudogene 18; ribosomal protein SA; ribosomal protein SA pseudogene 15; ribosomal protein SA pseudogene 61; ribosomal protein SA pseudogene 29; ribosomal protein SA pseudogene 12 | Homo sapiens |
| 389141 | ribosomal protein SA pseudogene 9; ribosomal protein SA pseudogene 8; ribosomal protein SA pseudogene 58; ribosomal protein SA pseudogene 19; ribosomal protein SA pseudogene 18; ribosomal protein SA; ribosomal protein SA pseudogene 15; ribosomal protein SA pseudogene 61; ribosomal protein SA pseudogene 29; ribosomal protein SA pseudogene 12 | Homo sapiens |
| 3921   | ribosomal protein SA pseudogene 9; ribosomal protein SA pseudogene 8; ribosomal protein SA pseudogene 58; ribosomal protein SA pseudogene 19; ribosomal protein SA pseudogene 18; ribosomal protein SA; ribosomal protein SA pseudogene 15; ribosomal protein SA pseudogene 61; ribosomal protein SA pseudogene 29; ribosomal protein SA pseudogene 12 | Homo sapiens |
| 387867 | ribosomal protein SA pseudogene 9; ribosomal protein SA pseudogene 8; ribosomal protein SA pseudogene 58; ribosomal protein SA pseudogene 19; ribosomal protein SA pseudogene 18; ribosomal protein SA; ribosomal protein SA pseudogene 15; ribosomal protein SA pseudogene 61; ribosomal protein SA pseudogene 29; ribosomal protein SA pseudogene 12 | Homo sapiens |
| 643617 | ribosomal protein SA pseudogene 9; ribosomal protein SA pseudogene 8; ribosomal protein SA pseudogene 58; ribosomal protein SA pseudogene 19; ribosomal protein SA pseudogene 18; ribosomal protein SA; ribosomal protein SA pseudogene 15; ribosomal protein SA pseudogene 61; ribosomal protein SA pseudogene 29; ribosomal protein SA pseudogene 12 | Homo sapiens |
| 388707 | ribosomal protein SA pseudogene 9; ribosomal protein SA pseudogene 8; ribosomal protein SA pseudogene 58; ribosomal protein SA pseudogene 19; ribosomal protein SA pseudogene 18; ribosomal protein SA; ribosomal protein SA pseudogene 15; ribosomal protein SA pseudogene 61; ribosomal protein SA pseudogene 29; ribosomal protein SA pseudogene 12 | Homo sapiens |
| 653162 | ribosomal protein SA pseudogene 9; ribosomal protein SA pseudogene 8; ribosomal protein SA pseudogene 58; ribosomal protein SA pseudogene 19; ribosomal protein SA pseudogene 18; ribosomal protein SA; ribosomal protein SA pseudogene 15; ribosomal protein SA pseudogene 61; ribosomal protein SA pseudogene 29; ribosomal protein SA pseudogene 12 | Homo sapiens |
| 730029 | ribosomal protein SA pseudogene 9; ribosomal protein SA pseudogene 8; ribosomal protein SA pseudogene 58; ribosomal protein SA pseudogene 19; ribosomal protein SA pseudogene 18; ribosomal protein SA; ribosomal protein SA pseudogene 15; ribosomal protein SA pseudogene 61; ribosomal protein SA pseudogene 29; ribosomal protein SA pseudogene 12 | Homo sapiens |
| 220885 | ribosomal protein SA pseudogene 9; ribosomal protein SA pseudogene 8; ribosomal protein SA pseudogene 58; ribosomal protein SA pseudogene 19; ribosomal protein SA pseudogene 18; ribosomal protein SA; ribosomal protein SA pseudogene 15; ribosomal protein SA pseudogene 61; ribosomal protein SA pseudogene 29; ribosomal protein SA pseudogene 12 | Homo sapiens |
| 644464 | ribosomal protein SA pseudogene 9; ribosomal protein SA pseudogene 8; ribosomal protein SA pseudogene 58; ribosomal protein SA pseudogene 19; ribosomal protein SA pseudogene 18; ribosomal protein SA; ribosomal protein SA pseudogene 15; ribosomal protein SA pseudogene 61; ribosomal protein SA pseudogene 29; ribosomal protein SA pseudogene 12 | Homo sapiens |
| 8891   | eukaryotic translation initiation factor 2B, subunit 3 gamma, 58kDa                                                                                                                                                                                                                                                                                    | Homo sapiens |
| 51667  | negative regulator of ubiquitin-like proteins 1                                                                                                                                                                                                                                                                                                        | Homo sapiens |
| 5562   | protein kinase, AMP-activated, alpha 1 catalytic subunit                                                                                                                                                                                                                                                                                               | Homo sapiens |
| 54504  | carboxypeptidase, vitellogenic-like                                                                                                                                                                                                                                                                                                                    | Homo sapiens |
| 220717 | ribosomal protein, large, P0 pseudogene 2; ribosomal protein, large, P0 pseudogene 3; ribosomal protein, large, P0 pseudogene 6; ribosomal protein, large, P0                                                                                                                                                                                          | Homo sapiens |
| 113157 | ribosomal protein, large, P0 pseudogene 2; ribosomal protein, large, P0 pseudogene 3; ribosomal protein, large, P0 pseudogene 6; ribosomal protein, large, P0                                                                                                                                                                                          | Homo sapiens |
| 6175   | ribosomal protein, large, P0 pseudogene 2; ribosomal protein, large, P0 pseudogene 3; ribosomal protein, large, P0 pseudogene 6; ribosomal protein, large, P0                                                                                                                                                                                          | Homo sapiens |
| 122589 | ribosomal protein, large, P0 pseudogene 2; ribosomal protein, large, P0 pseudogene 3; ribosomal protein, large, P0 pseudogene 6; ribosomal protein, large, P0                                                                                                                                                                                          | Homo sapiens |
| 1755   | deleted in malignant brain tumors 1                                                                                                                                                                                                                                                                                                                    | Homo sapiens |
| 4893   | neuroblastoma RAS viral (v-ras) oncogene homolog                                                                                                                                                                                                                                                                                                       | Homo sapiens |
| 5709   | proteasome (prosome, macropain) 26S subunit, non-ATPase, 3                                                                                                                                                                                                                                                                                             | Homo sapiens |
| 5550   | prolyl endopeptidase                                                                                                                                                                                                                                                                                                                                   | Homo sapiens |
| 1933   | eukaryotic translation elongation factor 1 beta 2; eukaryotic translation elongation factor 1 beta 2-like                                                                                                                                                                                                                                              | Homo sapiens |
| 10540  | dynactin 2 (p50)                                                                                                                                                                                                                                                                                                                                       | Homo sapiens |
| 255743 | nephronectin                                                                                                                                                                                                                                                                                                                                           | Homo sapiens |
| 1431   | citrate synthase                                                                                                                                                                                                                                                                                                                                       | Homo sapiens |
| 3831   | kinesin light chain 1                                                                                                                                                                                                                                                                                                                                  | Homo sapiens |
| 5686   | proteasome (prosome, macropain) subunit, alpha type, 5                                                                                                                                                                                                                                                                                                 | Homo sapiens |
| 1174   | adaptor-related protein complex 1, sigma 1 subunit                                                                                                                                                                                                                                                                                                     | Homo sapiens |
| 3630   | insulin-like growth factor 2 (somatomedin A); insulin; INS-IGF2 readthrough transcript                                                                                                                                                                                                                                                                 | Homo sapiens |
| 3481   | insulin-like growth factor 2 (somatomedin A); insulin; INS-IGF2 readthrough transcript                                                                                                                                                                                                                                                                 | Homo sapiens |
| 8976   | Wiskott-Aldrich syndrome-like                                                                                                                                                                                                                                                                                                                          | Homo sapiens |
| 55243  | kin of IRRE like (Drosophila)                                                                                                                                                                                                                                                                                                                          | Homo sapiens |
| 3313   | heat shock 70kDa protein 9 (mortalin)                                                                                                                                                                                                                                                                                                                  | Homo sapiens |
| 2665   | GDP dissociation inhibitor 2                                                                                                                                                                                                                                                                                                                           | Homo sapiens |
| 2923   | protein disulfide isomerase family A, member 3                                                                                                                                                                                                                                                                                                         | Homo sapiens |
| 1291   | collagen, type VI, alpha 1                                                                                                                                                                                                                                                                                                                             | Homo sapiens |
| 284996 | ring finger protein 149                                                                                                                                                                                                                                                                                                                                | Homo sapiens |
| 11047  | adhesion regulating molecule 1                                                                                                                                                                                                                                                                                                                         | Homo sapiens |
| 8683   | splicing factor, arginine/serine-rich 9                                                                                                                                                                                                                                                                                                                | Homo sapiens |
| 10286  | breast carcinoma amplified sequence 2                                                                                                                                                                                                                                                                                                                  | Homo sapiens |
| 23279  | nucleoporin 160kDa                                                                                                                                                                                                                                                                                                                                     | Homo sapiens |
| 79980  | DSN1, MIND kinetochore complex component, homolog (S. cerevisiae)                                                                                                                                                                                                                                                                                      | Homo sapiens |
| 23524  | serine/arginine repetitive matrix 2; hypothetical LOC100132779                                                                                                                                                                                                                                                                                         | Homo sapiens |

|        |                                                                                                                                    |              |
|--------|------------------------------------------------------------------------------------------------------------------------------------|--------------|
| 5128   | PCTAIRE protein kinase 2                                                                                                           | Homo sapiens |
| 57617  | vacuolar protein sorting 18 homolog (S. cerevisiae)                                                                                | Homo sapiens |
| 7430   | hypothetical protein LOC100129652; ezrin                                                                                           | Homo sapiens |
| 5885   | RAD21 homolog (S. pombe)                                                                                                           | Homo sapiens |
| 6711   | spectrin, beta, non-erythrocytic 1                                                                                                 | Homo sapiens |
| 51474  | LIM domain and actin binding 1                                                                                                     | Homo sapiens |
| 4836   | N-myristoyltransferase 1                                                                                                           | Homo sapiens |
| 2909   | glucocorticoid receptor DNA binding factor 1                                                                                       | Homo sapiens |
| 55705  | importin 9                                                                                                                         | Homo sapiens |
| 9545   | RAB3D, member RAS oncogene family                                                                                                  | Homo sapiens |
| 11258  | dynactin 3 (p22)                                                                                                                   | Homo sapiens |
| 8761   | poly(A) binding protein, cytoplasmic 4 (inducible form)                                                                            | Homo sapiens |
| 55714  | odz, odd Oz/ten-m homolog 3 (Drosophila)                                                                                           | Homo sapiens |
| 4758   | sialidase 1 (lysosomal sialidase)                                                                                                  | Homo sapiens |
| 1736   | dyskeratosis congenita 1, dyskerin                                                                                                 | Homo sapiens |
| 54521  | WD repeat domain 44                                                                                                                | Homo sapiens |
| 80335  | WD repeat domain 82                                                                                                                | Homo sapiens |
| 7402   | utrophin                                                                                                                           | Homo sapiens |
| 9784   | sorting nexin 17                                                                                                                   | Homo sapiens |
| 5481   | peptidylprolyl isomerase D                                                                                                         | Homo sapiens |
| 3910   | laminin, alpha 4                                                                                                                   | Homo sapiens |
| 23673  | syntaxin 12                                                                                                                        | Homo sapiens |
| 55666  | nuclear protein localization 4 homolog (S. cerevisiae)                                                                             | Homo sapiens |
| 3376   | isoleucyl-tRNA synthetase                                                                                                          | Homo sapiens |
| 6141   | ribosomal protein L18                                                                                                              | Homo sapiens |
| 6421   | splicing factor proline/glutamine-rich (polypyrimidine tract binding protein associated)                                           | Homo sapiens |
| 11113  | citron (rho-interacting, serine/threonine kinase 21)                                                                               | Homo sapiens |
| 2885   | growth factor receptor-bound protein 2                                                                                             | Homo sapiens |
| 191    | adenosylhomocysteinase                                                                                                             | Homo sapiens |
| 51755  | Cdc2-related kinase, arginine/serine-rich                                                                                          | Homo sapiens |
| 1660   | DEAH (Asp-Glu-Ala-His) box polypeptide 9                                                                                           | Homo sapiens |
| 10549  | peroxiredoxin 4                                                                                                                    | Homo sapiens |
| 4771   | neurofibromin 2 (merlin)                                                                                                           | Homo sapiens |
| 1404   | hyaluronan and proteoglycan link protein 1                                                                                         | Homo sapiens |
| 207    | v-akt murine thymoma viral oncogene homolog 1                                                                                      | Homo sapiens |
| 57418  | WD repeat domain 18                                                                                                                | Homo sapiens |
| 10678  | UDP-GlcNAc:betaGal beta-1,3-N-acetylglucosaminyltransferase 1; UDP-GlcNAc:betaGal beta-1,3-N-acetylglucosaminyltransferase 2       | Homo sapiens |
| 26985  | adaptor-related protein complex 3, mu 1 subunit                                                                                    | Homo sapiens |
| 22930  | RAB3 GTPase activating protein subunit 1 (catalytic)                                                                               | Homo sapiens |
| 1462   | versican                                                                                                                           | Homo sapiens |
| 23654  | plexin B2                                                                                                                          | Homo sapiens |
| 6191   | ribosomal protein S4X pseudogene 6; ribosomal protein S4X pseudogene 13; ribosomal protein S4, X-linked                            | Homo sapiens |
| 390183 | ribosomal protein S4X pseudogene 6; ribosomal protein S4X pseudogene 13; ribosomal protein S4, X-linked                            | Homo sapiens |
| 391777 | ribosomal protein S4X pseudogene 6; ribosomal protein S4X pseudogene 13; ribosomal protein S4, X-linked                            | Homo sapiens |
| 3146   | high-mobility group box 1; high-mobility group box 1-like 10                                                                       | Homo sapiens |
| 4154   | muscleblind-like (Drosophila)                                                                                                      | Homo sapiens |
| 10482  | nuclear RNA export factor 1                                                                                                        | Homo sapiens |
| 81873  | actin related protein 2/3 complex, subunit 5-like                                                                                  | Homo sapiens |
| 400750 | hypothetical gene supported by AF216292; NM_005347; heat shock 70kDa protein 5 (glucose-regulated protein, 78kDa)                  | Homo sapiens |
| 3309   | hypothetical gene supported by AF216292; NM_005347; heat shock 70kDa protein 5 (glucose-regulated protein, 78kDa)                  | Homo sapiens |
| 23481  | pescadillo homolog 1, containing BRCT domain (zebrafish)                                                                           | Homo sapiens |
| 1434   | CSE1 chromosome segregation 1-like (yeast)                                                                                         | Homo sapiens |
| 871    | serpin peptidase inhibitor, clade H (heat shock protein 47), member 1, (collagen binding protein 1)                                | Homo sapiens |
| 805    | calmodulin 3 (phosphorylase kinase, delta); calmodulin 2 (phosphorylase kinase, delta); calmodulin 1 (phosphorylase kinase, delta) | Homo sapiens |
| 808    | calmodulin 3 (phosphorylase kinase, delta); calmodulin 2 (phosphorylase kinase, delta); calmodulin 1 (phosphorylase kinase, delta) | Homo sapiens |
| 801    | calmodulin 3 (phosphorylase kinase, delta); calmodulin 2 (phosphorylase kinase, delta); calmodulin 1 (phosphorylase kinase, delta) | Homo sapiens |
| 728689 | eukaryotic translation initiation factor 3, subunit C-like                                                                         | Homo sapiens |
| 55308  | DEAD (Asp-Glu-Ala-As) box polypeptide 19A                                                                                          | Homo sapiens |
| 142    | poly (ADP-ribose) polymerase 1                                                                                                     | Homo sapiens |
| 57461  | ISY1 splicing factor homolog (S. cerevisiae)                                                                                       | Homo sapiens |
| 55763  | exocyst complex component 1                                                                                                        | Homo sapiens |
| 445    | argininosuccinate synthetase 1                                                                                                     | Homo sapiens |
| 1503   | CTP synthase                                                                                                                       | Homo sapiens |
| 389898 | ubiquitin-conjugating enzyme E2N-like                                                                                              | Homo sapiens |
| 7171   | tropomyosin 4                                                                                                                      | Homo sapiens |
| 79567  | family with sequence similarity 65, member A                                                                                       | Homo sapiens |
| 56897  | Werner helicase interacting protein 1                                                                                              | Homo sapiens |
| 5518   | protein phosphatase 2 (formerly 2A), regulatory subunit A, alpha isoform                                                           | Homo sapiens |
| 55844  | protein phosphatase 2, regulatory subunit B, delta isoform                                                                         | Homo sapiens |
| 283450 | chromosome 12 open reading frame 51                                                                                                | Homo sapiens |
| 23549  | aspartyl aminopeptidase                                                                                                            | Homo sapiens |
| 3336   | heat shock 10kDa protein 1 (chaperonin 10)                                                                                         | Homo sapiens |
| 2802   | golgi autoantigen, golgin subfamily a, 3                                                                                           | Homo sapiens |
| 2      | alpha-2-macroglobulin                                                                                                              | Homo sapiens |
| 1000   | cadherin 2, type 1, N-cadherin (neuronal)                                                                                          | Homo sapiens |

|           |                                                                                                                                                                          |              |
|-----------|--------------------------------------------------------------------------------------------------------------------------------------------------------------------------|--------------|
| 8473      | O-linked N-acetylglucosamine (GlcNAc) transferase (UDP-N-acetylglucosamine:polypeptide-N-acetylglucosaminyl transferase)                                                 | Homo sapiens |
| 790       | carbamoyl-phosphate synthetase 2, aspartate transcarbamylase, and dihydroorotase                                                                                         | Homo sapiens |
| 79711     | importin 4                                                                                                                                                               | Homo sapiens |
| 11332     | acyl-CoA thioesterase 7                                                                                                                                                  | Homo sapiens |
| 867       | Cas-Br-M (murine) ecotropic retroviral transforming sequence                                                                                                             | Homo sapiens |
| 200014    | coiled-coil and C2 domain containing 1B                                                                                                                                  | Homo sapiens |
| 10155     | tripartite motif-containing 28                                                                                                                                           | Homo sapiens |
| 1280      | collagen, type II, alpha 1                                                                                                                                               | Homo sapiens |
| 81619     | tetraspanin 14                                                                                                                                                           | Homo sapiens |
| 23380     | SLIT-ROBO Rho GTPase activating protein 2                                                                                                                                | Homo sapiens |
| 10109     | actin related protein 2/3 complex, subunit 2, 34kDa                                                                                                                      | Homo sapiens |
| 1452      | casein kinase 1, alpha 1                                                                                                                                                 | Homo sapiens |
| 83988     | neurocalcin delta                                                                                                                                                        | Homo sapiens |
| 5687      | proteasome (prosome, macropain) subunit, alpha type, 6                                                                                                                   | Homo sapiens |
| 2781      | guanine nucleotide binding protein (G protein), alpha z polypeptide                                                                                                      | Homo sapiens |
| 29979     | ubiquilin 1                                                                                                                                                              | Homo sapiens |
| 29087     | thymocyte nuclear protein 1                                                                                                                                              | Homo sapiens |
| 54622     | ADP-ribosylation factor-like 15                                                                                                                                          | Homo sapiens |
| 5901      | RAN, member RAS oncogene family                                                                                                                                          | Homo sapiens |
| 27340     | similar to Down-regulated in metastasis protein (Key-1A6 protein) (Novel nucleolar protein 73) (NNP73); UTP20, small subunit (SSU) processome component, homolog (yeast) | Homo sapiens |
| 8125      | hepatopietin Pcn127; acidic (leucine-rich) nuclear phosphoprotein 32 family, member A                                                                                    | Homo sapiens |
| 3959      | lectin, galactoside-binding, soluble, 3 binding protein                                                                                                                  | Homo sapiens |
| 3190      | heterogeneous nuclear ribonucleoprotein K; similar to heterogeneous nuclear ribonucleoprotein K                                                                          | Homo sapiens |
| 5981      | replication factor C (activator 1) 1, 145kDa                                                                                                                             | Homo sapiens |
| 10212     | DEAD (Asp-Glu-Ala-Asp) box polypeptide 39                                                                                                                                | Homo sapiens |
| 6632      | small nuclear ribonucleoprotein D1 polypeptide 16kDa; hypothetical protein LOC100129492                                                                                  | Homo sapiens |
| 100129492 | small nuclear ribonucleoprotein D1 polypeptide 16kDa; hypothetical protein LOC100129492                                                                                  | Homo sapiens |
| 57446     | NDRG family member 3                                                                                                                                                     | Homo sapiens |
| 5707      | proteasome (prosome, macropain) 26S subunit, non-ATPase, 1                                                                                                               | Homo sapiens |
| 9322      | thyroid hormone receptor interactor 10                                                                                                                                   | Homo sapiens |
| 51510     | chromatin modifying protein 5                                                                                                                                            | Homo sapiens |
| 984       | similar to cell division cycle 2-like 1 (PITSLRE proteins); cell division cycle 2-like 1 (PITSLRE proteins); cell division cycle 2-like 2 (PITSLRE proteins)             | Homo sapiens |
| 221927    | chromosome 7 open reading frame 27                                                                                                                                       | Homo sapiens |
| 6647      | superoxide dismutase 1, soluble                                                                                                                                          | Homo sapiens |
| 8934      | RAB7, member RAS oncogene family-like 1                                                                                                                                  | Homo sapiens |
| 3836      | karyopherin alpha 1 (importin alpha 5)                                                                                                                                   | Homo sapiens |
| 1368      | carboxypeptidase M                                                                                                                                                       | Homo sapiens |
| 5245      | prohibitin                                                                                                                                                               | Homo sapiens |
| 4628      | myosin, heavy chain 10, non-muscle                                                                                                                                       | Homo sapiens |
| 9948      | WD repeat domain 1                                                                                                                                                       | Homo sapiens |
| 27436     | echinoderm microtubule associated protein like 4                                                                                                                         | Homo sapiens |
| 25796     | 6-phosphogluconolactonase                                                                                                                                                | Homo sapiens |
| 55681     | SCY1-like 2 (S. cerevisiae)                                                                                                                                              | Homo sapiens |
| 10075     | HECT, UBA and WWE domain containing 1                                                                                                                                    | Homo sapiens |
| 8668      | eukaryotic translation initiation factor 3, subunit I                                                                                                                    | Homo sapiens |
| 26121     | PRP31 pre-mRNA processing factor 31 homolog (S. cerevisiae)                                                                                                              | Homo sapiens |
| 5256      | phosphorylase kinase, alpha 2 (liver)                                                                                                                                    | Homo sapiens |
| 10857     | progesterone receptor membrane component 1                                                                                                                               | Homo sapiens |
| 5591      | similar to protein kinase, DNA-activated, catalytic polypeptide; protein kinase, DNA-activated, catalytic polypeptide                                                    | Homo sapiens |
| 29966     | striatin, calmodulin binding protein 3                                                                                                                                   | Homo sapiens |
| 1653      | DEAD (Asp-Glu-Ala-Asp) box polypeptide 1                                                                                                                                 | Homo sapiens |
| 23244     | PDS5, regulator of cohesion maintenance, homolog A (S. cerevisiae)                                                                                                       | Homo sapiens |
| 51762     | RAB8B, member RAS oncogene family                                                                                                                                        | Homo sapiens |
| 9392      | transforming growth factor, beta receptor associated protein 1                                                                                                           | Homo sapiens |
| 9582      | apolipoprotein B mRNA editing enzyme, catalytic polypeptide-like 3B                                                                                                      | Homo sapiens |
| 389       | ras homolog gene family, member C                                                                                                                                        | Homo sapiens |
| 55920     | regulator of chromosome condensation 2                                                                                                                                   | Homo sapiens |
| 5688      | proteasome (prosome, macropain) subunit, alpha type, 7                                                                                                                   | Homo sapiens |
| 821       | calnexin                                                                                                                                                                 | Homo sapiens |
| 6709      | spectrin, alpha, non-erythrocytic 1 (alpha-fodrin)                                                                                                                       | Homo sapiens |
| 1282      | collagen, type IV, alpha 1                                                                                                                                               | Homo sapiens |
| 162       | adaptor-related protein complex 1, beta 1 subunit                                                                                                                        | Homo sapiens |
| 1017      | cyclin-dependent kinase 2                                                                                                                                                | Homo sapiens |
| 26509     | myoferlin                                                                                                                                                                | Homo sapiens |
| 9397      | N-myristoyltransferase 2                                                                                                                                                 | Homo sapiens |
| 10097     | ARP2 actin-related protein 2 homolog (yeast)                                                                                                                             | Homo sapiens |
| 6320      | C-type lectin domain family 11, member A                                                                                                                                 | Homo sapiens |
| 2335      | fibronectin 1                                                                                                                                                            | Homo sapiens |
| 10174     | sorbin and SH3 domain containing 3                                                                                                                                       | Homo sapiens |
| 3326      | heat shock protein 90kDa alpha (cytosolic), class B member 1                                                                                                             | Homo sapiens |
| 6160      | ribosomal protein L31 pseudogene 49; ribosomal protein L31 pseudogene 17; ribosomal protein L31                                                                          | Homo sapiens |
| 255967    | PAN3 poly(A) specific ribonuclease subunit homolog (S. cerevisiae)                                                                                                       | Homo sapiens |
| 4067      | v-yes-1 Yamaguchi sarcoma viral related oncogene homolog                                                                                                                 | Homo sapiens |
| 23670     | transmembrane protein 2                                                                                                                                                  | Homo sapiens |
| 23225     | nucleoporin 210kDa                                                                                                                                                       | Homo sapiens |
| 10111     | RAD50 homolog (S. cerevisiae)                                                                                                                                            | Homo sapiens |
| 1968      | eukaryotic translation initiation factor 2, subunit 3 gamma, 52kDa                                                                                                       | Homo sapiens |
| 1604      | CD55 molecule, decay accelerating factor for complement (Cromer blood group)                                                                                             | Homo sapiens |
| 3611      | integrin-linked kinase                                                                                                                                                   | Homo sapiens |
| 23111     | spastic paraplegia 20 (Troyer syndrome)                                                                                                                                  | Homo sapiens |
| 51493     | chromosome 22 open reading frame 28                                                                                                                                      | Homo sapiens |
| 5887      | RAD23 homolog B (S. cerevisiae)                                                                                                                                          | Homo sapiens |

|        |                                                                                                                                                                                                                                                                                                                                                                                                    |              |
|--------|----------------------------------------------------------------------------------------------------------------------------------------------------------------------------------------------------------------------------------------------------------------------------------------------------------------------------------------------------------------------------------------------------|--------------|
| 23070  | FtsJ methyltransferase domain containing 2                                                                                                                                                                                                                                                                                                                                                         | Homo sapiens |
| 6921   | similar to elongin C; transcription elongation factor B (SIII), polypeptide 1 (15kDa, elongin C)                                                                                                                                                                                                                                                                                                   | Homo sapiens |
| 80155  | NMDA receptor regulated 1                                                                                                                                                                                                                                                                                                                                                                          | Homo sapiens |
| 4172   | minichromosome maintenance complex component 3                                                                                                                                                                                                                                                                                                                                                     | Homo sapiens |
| 10061  | ATP-binding cassette, sub-family F (GCN20), member 2                                                                                                                                                                                                                                                                                                                                               | Homo sapiens |
| 30000  | transportin 2                                                                                                                                                                                                                                                                                                                                                                                      | Homo sapiens |
| 23607  | CD2-associated protein                                                                                                                                                                                                                                                                                                                                                                             | Homo sapiens |
| 9946   | crystallin, zeta (quinone reductase)-like 1                                                                                                                                                                                                                                                                                                                                                        | Homo sapiens |
| 377    | ADP-ribosylation factor 3                                                                                                                                                                                                                                                                                                                                                                          | Homo sapiens |
| 4162   | melanoma cell adhesion molecule                                                                                                                                                                                                                                                                                                                                                                    | Homo sapiens |
| 5718   | proteasome (prosome, macropain) 26S subunit, non-ATPase, 12                                                                                                                                                                                                                                                                                                                                        | Homo sapiens |
| 178    | amylase-1, 6-galactosidase, 4-alpha-galactanotransferase                                                                                                                                                                                                                                                                                                                                           | Homo sapiens |
| 6845   | vesicle-associated membrane protein 7                                                                                                                                                                                                                                                                                                                                                              | Homo sapiens |
| 10535  | ribonuclease H2, subunit A                                                                                                                                                                                                                                                                                                                                                                         | Homo sapiens |
| 8455   | attractin                                                                                                                                                                                                                                                                                                                                                                                          | Homo sapiens |
| 9361   | lon peptidase 1, mitochondrial                                                                                                                                                                                                                                                                                                                                                                     | Homo sapiens |
| 9632   | SEC24 family, member C ( <i>S. cerevisiae</i> )                                                                                                                                                                                                                                                                                                                                                    | Homo sapiens |
| 4927   | nucleoporin 88kDa                                                                                                                                                                                                                                                                                                                                                                                  | Homo sapiens |
| 5868   | RAB5A, member RAS oncogene family                                                                                                                                                                                                                                                                                                                                                                  | Homo sapiens |
| 1819   | developmentally regulated GTP binding protein 2                                                                                                                                                                                                                                                                                                                                                    | Homo sapiens |
| 8943   | adaptor-related protein complex 3, delta 1 subunit                                                                                                                                                                                                                                                                                                                                                 | Homo sapiens |
| 4000   | lamin A/C                                                                                                                                                                                                                                                                                                                                                                                          | Homo sapiens |
| 9188   | DEAD (Asp-Glu-Ala-Asp) box polypeptide 21                                                                                                                                                                                                                                                                                                                                                          | Homo sapiens |
| 8890   | eukaryotic translation initiation factor 2B, subunit 4 delta, 67kDa                                                                                                                                                                                                                                                                                                                                | Homo sapiens |
| 23137  | structural maintenance of chromosomes 5                                                                                                                                                                                                                                                                                                                                                            | Homo sapiens |
| 64786  | TBC1 domain family, member 15                                                                                                                                                                                                                                                                                                                                                                      | Homo sapiens |
| 94031  | HtrA serine peptidase 3                                                                                                                                                                                                                                                                                                                                                                            | Homo sapiens |
| 6510   | solute carrier family 1 (neutral amino acid transporter), member 5                                                                                                                                                                                                                                                                                                                                 | Homo sapiens |
| 11335  | similar to chromobox homolog 3; chromobox homolog 3 (HP1 gamma homolog, <i>Drosophila</i> )                                                                                                                                                                                                                                                                                                        | Homo sapiens |
| 3895   | kinectin 1 (kinesin receptor)                                                                                                                                                                                                                                                                                                                                                                      | Homo sapiens |
| 9341   | vesicle-associated membrane protein 3 (cellubrevin)                                                                                                                                                                                                                                                                                                                                                | Homo sapiens |
| 7247   | translin                                                                                                                                                                                                                                                                                                                                                                                           | Homo sapiens |
| 51504  | tRNA methyltransferase 11-2 homolog ( <i>S. cerevisiae</i> ); similar to CG12975                                                                                                                                                                                                                                                                                                                   | Homo sapiens |
| 2339   | farnesyltransferase, CAAX box, alpha                                                                                                                                                                                                                                                                                                                                                               | Homo sapiens |
| 10095  | actin related protein 2/3 complex, subunit 1B, 41kDa; similar to Actin-related protein 2/3 complex subunit 1B (ARP2/3 complex 41 kDa subunit) (p41-ARC)                                                                                                                                                                                                                                            | Homo sapiens |
| 6748   | signal sequence receptor, delta (translocon-associated protein delta)                                                                                                                                                                                                                                                                                                                              | Homo sapiens |
| 51678  | membrane protein, palmitoylated 6 (MAGUK p55 subfamily member 6)                                                                                                                                                                                                                                                                                                                                   | Homo sapiens |
| 83706  | fermitin family homolog 3 ( <i>Drosophila</i> )                                                                                                                                                                                                                                                                                                                                                    | Homo sapiens |
| 10611  | PDZ and LIM domain 5                                                                                                                                                                                                                                                                                                                                                                               | Homo sapiens |
| 8440   | NCK adaptor protein 2                                                                                                                                                                                                                                                                                                                                                                              | Homo sapiens |
| 4676   | nucleosome assembly protein 1-like 4                                                                                                                                                                                                                                                                                                                                                               | Homo sapiens |
| 7385   | ubiquinol-cytochrome c reductase core protein II                                                                                                                                                                                                                                                                                                                                                   | Homo sapiens |
| 10657  | KH domain containing, RNA binding, signal transduction associated 1                                                                                                                                                                                                                                                                                                                                | Homo sapiens |
| 6128   | ribosomal protein L6 pseudogene 27; ribosomal protein L6 pseudogene 19; ribosomal protein L6; ribosomal protein L6 pseudogene 10                                                                                                                                                                                                                                                                   | Homo sapiens |
| 2050   | EPH receptor B4                                                                                                                                                                                                                                                                                                                                                                                    | Homo sapiens |
| 6139   | ribosomal protein L17 pseudogene 22; ribosomal protein L17 pseudogene 36; ribosomal protein L17 pseudogene 20; similar to ribosomal protein L17; ribosomal protein L17 pseudogene 33; ribosomal protein L17 pseudogene 34; ribosomal protein L17 pseudogene 9; ribosomal protein L17; ribosomal protein L17 pseudogene 18; ribosomal protein L17 pseudogene 7; ribosomal protein L17 pseudogene 39 | Homo sapiens |
| 1845   | dual specificity phosphatase 3                                                                                                                                                                                                                                                                                                                                                                     | Homo sapiens |
| 64328  | exportin 4                                                                                                                                                                                                                                                                                                                                                                                         | Homo sapiens |
| 23438  | histidyl-tRNA synthetase 2, mitochondrial (putative); D-tyrosyl-tRNA deacylase 1 homolog ( <i>S. cerevisiae</i> )                                                                                                                                                                                                                                                                                  | Homo sapiens |
| 25932  | chloride intracellular channel 4                                                                                                                                                                                                                                                                                                                                                                   | Homo sapiens |
| 23165  | nucleoporin 205kDa                                                                                                                                                                                                                                                                                                                                                                                 | Homo sapiens |
| 6727   | signal recognition particle 14kDa (homologous Alu RNA binding protein) pseudogene 1; signal recognition particle 14kDa (homologous Alu RNA binding protein)                                                                                                                                                                                                                                        | Homo sapiens |
| 9761   | malectin                                                                                                                                                                                                                                                                                                                                                                                           | Homo sapiens |
| 84790  | tubulin, alpha 1c                                                                                                                                                                                                                                                                                                                                                                                  | Homo sapiens |
| 54623  | Paf1, RNA polymerase II associated factor, homolog ( <i>S. cerevisiae</i> )                                                                                                                                                                                                                                                                                                                        | Homo sapiens |
| 4637   | myosin, light chain 6, alkali, smooth muscle and non-muscle                                                                                                                                                                                                                                                                                                                                        | Homo sapiens |
| 11224  | ribosomal protein L35; ribosomal protein L35 pseudogene 1; ribosomal protein L35 pseudogene 2                                                                                                                                                                                                                                                                                                      | Homo sapiens |
| 3608   | interleukin enhancer binding factor 2, 45kDa                                                                                                                                                                                                                                                                                                                                                       | Homo sapiens |
| 3241   | hippocalcin-like 1                                                                                                                                                                                                                                                                                                                                                                                 | Homo sapiens |
| 1969   | EPH receptor A2                                                                                                                                                                                                                                                                                                                                                                                    | Homo sapiens |
| 9525   | vacuolar protein sorting 4 homolog B ( <i>S. cerevisiae</i> )                                                                                                                                                                                                                                                                                                                                      | Homo sapiens |
| 10146  | GTPase activating protein (SH3 domain) binding protein 1                                                                                                                                                                                                                                                                                                                                           | Homo sapiens |
| 11140  | cell division cycle 37 homolog ( <i>S. cerevisiae</i> )                                                                                                                                                                                                                                                                                                                                            | Homo sapiens |
| 124540 | musashi homolog 2 ( <i>Drosophila</i> )                                                                                                                                                                                                                                                                                                                                                            | Homo sapiens |
| 112858 | TP53 regulating kinase                                                                                                                                                                                                                                                                                                                                                                             | Homo sapiens |
| 23223  | ribosomal RNA processing 12 homolog ( <i>S. cerevisiae</i> )                                                                                                                                                                                                                                                                                                                                       | Homo sapiens |
| 8666   | eukaryotic translation initiation factor 3, subunit G                                                                                                                                                                                                                                                                                                                                              | Homo sapiens |
| 1829   | desmoglein 2                                                                                                                                                                                                                                                                                                                                                                                       | Homo sapiens |
| 84100  | ADP-ribosylation factor-like 6                                                                                                                                                                                                                                                                                                                                                                     | Homo sapiens |
| 8665   | eukaryotic translation initiation factor 3, subunit F; similar to hCG2040283                                                                                                                                                                                                                                                                                                                       | Homo sapiens |
| 4192   | midkine (neurite growth-promoting factor 2)                                                                                                                                                                                                                                                                                                                                                        | Homo sapiens |
| 9260   | PDZ and LIM domain 7 (enigma)                                                                                                                                                                                                                                                                                                                                                                      | Homo sapiens |
| 7277   | tubulin, alpha 4a                                                                                                                                                                                                                                                                                                                                                                                  | Homo sapiens |
| 54994  | chromosome 20 open reading frame 11                                                                                                                                                                                                                                                                                                                                                                | Homo sapiens |
| 81887  | LAS1-like ( <i>S. cerevisiae</i> )                                                                                                                                                                                                                                                                                                                                                                 | Homo sapiens |
| 10020  | glucosamine (UDP-N-acetyl)-2-epimerase/N-acetylmannosamine kinase                                                                                                                                                                                                                                                                                                                                  | Homo sapiens |
| 949    | scavenger receptor class B, member 1                                                                                                                                                                                                                                                                                                                                                               | Homo sapiens |

|        |                                                                                                                                                                                                       |              |
|--------|-------------------------------------------------------------------------------------------------------------------------------------------------------------------------------------------------------|--------------|
| 2673   | glutamine-fructose-6-phosphate transaminase 1                                                                                                                                                         | Homo sapiens |
| 5814   | purine-rich element binding protein B                                                                                                                                                                 | Homo sapiens |
| 86     | actin-like 6A                                                                                                                                                                                         | Homo sapiens |
| 1655   | DEAD (Asp-Glu-Ala-Asp) box polypeptide 5                                                                                                                                                              | Homo sapiens |
| 5660   | prosaposin                                                                                                                                                                                            | Homo sapiens |
| 7037   | transferrin receptor (p90, CD71)                                                                                                                                                                      | Homo sapiens |
| 55215  | Fanconi anemia, complementation group I                                                                                                                                                               | Homo sapiens |
| 1025   | cyclin-dependent kinase 9                                                                                                                                                                             | Homo sapiens |
| 9908   | GTPase activating protein (SH3 domain) binding protein 2                                                                                                                                              | Homo sapiens |
| 6181   | ribosomal protein, large, P2 pseudogene 3; ribosomal protein, large, P2                                                                                                                               | Homo sapiens |
| 23095  | kinesin family member 1B                                                                                                                                                                              | Homo sapiens |
| 50488  | misshapen-like kinase 1 (zebrafish)                                                                                                                                                                   | Homo sapiens |
| 9321   | hypothetical LOC341378; thyroid hormone receptor interactor 11                                                                                                                                        | Homo sapiens |
| 1495   | catenin (cadherin-associated protein), alpha 1, 102kDa                                                                                                                                                | Homo sapiens |
| 23195  | MDN1, midasin homolog (yeast)                                                                                                                                                                         | Homo sapiens |
| 92755  | tubulin, beta; similar to tubulin, beta 5; tubulin, beta pseudogene 2; tubulin, beta pseudogene 1                                                                                                     | Homo sapiens |
| 647000 | tubulin, beta; similar to tubulin, beta 5; tubulin, beta pseudogene 2; tubulin, beta pseudogene 1                                                                                                     | Homo sapiens |
| 203068 | tubulin, beta; similar to tubulin, beta 5; tubulin, beta pseudogene 2; tubulin, beta pseudogene 1                                                                                                     | Homo sapiens |
| 442308 | tubulin, beta; similar to tubulin, beta 5; tubulin, beta pseudogene 2; tubulin, beta pseudogene 1                                                                                                     | Homo sapiens |
| 9124   | PDZ and LIM domain 1                                                                                                                                                                                  | Homo sapiens |
| 8027   | signal transducing adaptor molecule (SH3 domain and ITAM motif) 1                                                                                                                                     | Homo sapiens |
| 8663   | eukaryotic translation initiation factor 3, subunit C                                                                                                                                                 | Homo sapiens |
| 2752   | glutamate-ammonia ligase (glutamine synthetase)                                                                                                                                                       | Homo sapiens |
| 1690   | coagulation factor C homolog, cochlin (Limulus polyphemus)                                                                                                                                            | Homo sapiens |
| 54472  | toll interacting protein                                                                                                                                                                              | Homo sapiens |
| 5702   | proteasome (prosome, macropain) 26S subunit, ATPase, 3                                                                                                                                                | Homo sapiens |
| 55717  | bromodomain and WD repeat domain containing 2                                                                                                                                                         | Homo sapiens |
| 817    | calcium/calmodulin-dependent protein kinase II delta                                                                                                                                                  | Homo sapiens |
| 2959   | general transcription factor IIB                                                                                                                                                                      | Homo sapiens |
| 10426  | tubulin, gamma complex associated protein 3                                                                                                                                                           | Homo sapiens |
| 54433  | GAR1 ribonucleoprotein homolog (yeast)                                                                                                                                                                | Homo sapiens |
| 2935   | G1 to S phase transition 1                                                                                                                                                                            | Homo sapiens |
| 79612  | NMDA receptor regulated 1-like                                                                                                                                                                        | Homo sapiens |
| 7260   | tumor suppressing subtransferable candidate 1                                                                                                                                                         | Homo sapiens |
| 4853   | Notch homolog 2 (Drosophila)                                                                                                                                                                          | Homo sapiens |
| 22954  | tripartite motif-containing 32                                                                                                                                                                        | Homo sapiens |
| 292    | solute carrier family 25 (mitochondrial carrier; adenine nucleotide translocator), member 5; solute carrier family 25 (mitochondrial carrier; adenine nucleotide translocator), member 5 pseudogene 8 | Homo sapiens |
| 226    | aldolase A, fructose-bisphosphate                                                                                                                                                                     | Homo sapiens |
| 5704   | similar to 26S protease regulatory subunit 6B (MIP224) (MB67-interacting protein) (TAT-binding protein 7) (TBP-7); proteasome (prosome, macropain) 26S subunit, ATPase, 4                             | Homo sapiens |
| 2821   | glucose phosphate isomerase                                                                                                                                                                           | Homo sapiens |
| 1525   | coxsackie virus and adenovirus receptor pseudogene 2; coxsackie virus and adenovirus receptor                                                                                                         | Homo sapiens |
| 1104   | regulator of chromosome condensation 1; SNHG3-RCC1 readthrough transcript                                                                                                                             | Homo sapiens |
| 9584   | similar to RNA binding motif protein 39; RNA binding motif protein 39                                                                                                                                 | Homo sapiens |
| 80381  | CD276 molecule                                                                                                                                                                                        | Homo sapiens |
| 3093   | ubiquitin-conjugating enzyme E2K (UBC1 homolog, yeast)                                                                                                                                                | Homo sapiens |
| 5859   | glutamyl-tRNA synthetase                                                                                                                                                                              | Homo sapiens |
| 4240   | milk fat globule-EGF factor 8 protein                                                                                                                                                                 | Homo sapiens |
| 6240   | ribonucleotide reductase M1                                                                                                                                                                           | Homo sapiens |
| 5536   | protein phosphatase 5, catalytic subunit                                                                                                                                                              | Homo sapiens |
| 381    | ADP-ribosylation factor 5                                                                                                                                                                             | Homo sapiens |
| 7706   | tripartite motif-containing 25                                                                                                                                                                        | Homo sapiens |
| 4686   | nuclear cap binding protein subunit 1, 80kDa                                                                                                                                                          | Homo sapiens |
| 5693   | proteasome (prosome, macropain) subunit, beta type, 5                                                                                                                                                 | Homo sapiens |
| 3015   | H2A histone family, member Z                                                                                                                                                                          | Homo sapiens |
| 23450  | splicing factor 3b, subunit 3, 130kDa                                                                                                                                                                 | Homo sapiens |
| 5361   | plexin A1                                                                                                                                                                                             | Homo sapiens |
| 11331  | prohibitin 2                                                                                                                                                                                          | Homo sapiens |
| 8517   | inhibitor of kappa light polypeptide gene enhancer in B-cells, kinase gamma                                                                                                                           | Homo sapiens |
| 976    | CD97 molecule                                                                                                                                                                                         | Homo sapiens |
| 2058   | glutamyl-prolyl-tRNA synthetase                                                                                                                                                                       | Homo sapiens |
| 7874   | ubiquitin specific peptidase 7 (herpes virus-associated)                                                                                                                                              | Homo sapiens |
| 29127  | Rac GTPase activating protein 1 pseudogene; Rac GTPase activating protein 1                                                                                                                           | Homo sapiens |
| 5510   | protein phosphatase 1, regulatory (inhibitor) subunit 7                                                                                                                                               | Homo sapiens |
| 30845  | EH-domain containing 3                                                                                                                                                                                | Homo sapiens |
| 23077  | MYC binding protein 2                                                                                                                                                                                 | Homo sapiens |
| 2806   | glutamic-oxaloacetic transaminase 2, mitochondrial (aspartate aminotransferase 2)                                                                                                                     | Homo sapiens |
| 10131  | TNF receptor-associated protein 1                                                                                                                                                                     | Homo sapiens |
| 3416   | insulin-degrading enzyme                                                                                                                                                                              | Homo sapiens |
| 8449   | DEAH (Asp-Glu-Ala-His) box polypeptide 16                                                                                                                                                             | Homo sapiens |
| 51160  | vacuolar protein sorting 28 homolog (S. cerevisiae)                                                                                                                                                   | Homo sapiens |
| 55832  | cullin-associated and neddylation-dissociated 1                                                                                                                                                       | Homo sapiens |
| 8607   | RuvB-like 1 (E. coli)                                                                                                                                                                                 | Homo sapiens |
| 23382  | adenosylhomocysteinase-like 2                                                                                                                                                                         | Homo sapiens |
| 10963  | stress-induced-phosphoprotein 1                                                                                                                                                                       | Homo sapiens |
| 983    | cell division cycle 2, G1 to S and G2 to M                                                                                                                                                            | Homo sapiens |
| 7913   | DEK oncogene                                                                                                                                                                                          | Homo sapiens |
| 509    | ATP synthase, H+ transporting, mitochondrial F1 complex, gamma polypeptide 1                                                                                                                          | Homo sapiens |
| 3615   | IMP (inosine monophosphate) dehydrogenase 2                                                                                                                                                           | Homo sapiens |
| 25800  | solute carrier family 39 (zinc transporter), member 6                                                                                                                                                 | Homo sapiens |



|           |                                                                                                                                                                                                                      |              |
|-----------|----------------------------------------------------------------------------------------------------------------------------------------------------------------------------------------------------------------------|--------------|
| 6169      | ribosomal protein L38                                                                                                                                                                                                | Homo sapiens |
| 839       | caspase 6, apoptosis-related cysteine peptidase                                                                                                                                                                      | Homo sapiens |
| 10099     | tetraspanin 3                                                                                                                                                                                                        | Homo sapiens |
| 3303      | heat shock 70kDa protein 1A; heat shock 70kDa protein 1B                                                                                                                                                             | Homo sapiens |
| 3304      | heat shock 70kDa protein 1A; heat shock 70kDa protein 1B                                                                                                                                                             | Homo sapiens |
| 11261     | calcium binding protein P22                                                                                                                                                                                          | Homo sapiens |
| 23172     | family with sequence similarity 175, member B                                                                                                                                                                        | Homo sapiens |
| 4952      | oculocerebrorenal syndrome of Lowe                                                                                                                                                                                   | Homo sapiens |
| 9141      | programmed cell death 5                                                                                                                                                                                              | Homo sapiens |
| 5834      | phosphorylase, glycogen; brain                                                                                                                                                                                       | Homo sapiens |
| 9879      | DEAD (Asp-Glu-Ala-Asp) box polypeptide 46                                                                                                                                                                            | Homo sapiens |
| 93185     | immunoglobulin superfamily, member 8                                                                                                                                                                                 | Homo sapiens |
| 84747     | unc-119 homolog B (C. elegans)                                                                                                                                                                                       | Homo sapiens |
| 51010     | exosome component 3                                                                                                                                                                                                  | Homo sapiens |
| 9367      | RAB9A, member RAS oncogene family                                                                                                                                                                                    | Homo sapiens |
| 6207      | ribosomal protein S13 pseudogene 8; ribosomal protein S13; ribosomal protein S13 pseudogene 2                                                                                                                        | Homo sapiens |
| 64854     | ubiquitin specific peptidase 46                                                                                                                                                                                      | Homo sapiens |
| 4174      | minichromosome maintenance complex component 5                                                                                                                                                                       | Homo sapiens |
| 4190      | malate dehydrogenase 1, NAD (soluble)                                                                                                                                                                                | Homo sapiens |
| 4171      | minichromosome maintenance complex component 2                                                                                                                                                                       | Homo sapiens |
| 81609     | sorting nexin family member 27                                                                                                                                                                                       | Homo sapiens |
| 961       | CD47 molecule                                                                                                                                                                                                        | Homo sapiens |
| 2201      | fibrillin 2                                                                                                                                                                                                          | Homo sapiens |
| 85456     | tankyrase 1 binding protein 1, 182kDa                                                                                                                                                                                | Homo sapiens |
| 57544     | thioredoxin domain containing 16                                                                                                                                                                                     | Homo sapiens |
| 271       | adenosine monophosphate deaminase 2 (isoform L)                                                                                                                                                                      | Homo sapiens |
| 79598     | centrosomal protein 97kDa                                                                                                                                                                                            | Homo sapiens |
| 23325     | KIAA1033                                                                                                                                                                                                             | Homo sapiens |
| 55611     | OTU domain, ubiquitin aldehyde binding 1                                                                                                                                                                             | Homo sapiens |
| 8991      | selenium binding protein 1                                                                                                                                                                                           | Homo sapiens |
| 213       | albumin                                                                                                                                                                                                              | Homo sapiens |
| 23318     | zinc finger, CCHC domain containing 11                                                                                                                                                                               | Homo sapiens |
| 10594     | PRP8 pre-mRNA processing factor 8 homolog (S. cerevisiae)                                                                                                                                                            | Homo sapiens |
| 10015     | programmed cell death 6 interacting protein                                                                                                                                                                          | Homo sapiens |
| 771       | carbonic anhydrase XII                                                                                                                                                                                               | Homo sapiens |
| 5358      | plastin 3 (T isoform)                                                                                                                                                                                                | Homo sapiens |
| 3514      | similar to hCG26659; immunoglobulin kappa constant; similar to Ig kappa chain V-I region HK102 precursor                                                                                                             | Homo sapiens |
| 100130100 | similar to hCG26659; immunoglobulin kappa constant; similar to Ig kappa chain V-I region HK102 precursor                                                                                                             | Homo sapiens |
| 8499      | protein tyrosine phosphatase, receptor type, f polypeptide (PTPRF), interacting protein (liprin), alpha 2                                                                                                            | Homo sapiens |
| 6599      | SWI/SNF related, matrix associated, actin dependent regulator of chromatin, subfamily c, member 1                                                                                                                    | Homo sapiens |
| 51765     | serine/threonine protein kinase MST4                                                                                                                                                                                 | Homo sapiens |
| 81839     | vang-like 1 (van gogh, Drosophila)                                                                                                                                                                                   | Homo sapiens |
| 1479      | cleavage stimulation factor, 3' pre-rRNA, subunit 3, 77kDa                                                                                                                                                           | Homo sapiens |
| 1981      | eukaryotic translation initiation factor 4 gamma, 1                                                                                                                                                                  | Homo sapiens |
| 51593     | serrate RNA effector molecule homolog (Arabidopsis)                                                                                                                                                                  | Homo sapiens |
| 10092     | actin related protein 2/3 complex, subunit 5, 16kDa                                                                                                                                                                  | Homo sapiens |
| 4522      | methylenetetrahydrofolate dehydrogenase (NADP+ dependent) 1, methenyltetrahydrofolate cyclohydrolase, formyltetrahydrofolate synthetase                                                                              | Homo sapiens |
| 9475      | Rho-associated, coiled-coil containing protein kinase 2                                                                                                                                                              | Homo sapiens |
| 6210      | ribosomal protein S15a pseudogene 17; ribosomal protein S15a pseudogene 19; ribosomal protein S15a pseudogene 12; ribosomal protein S15a pseudogene 24; ribosomal protein S15a pseudogene 11; ribosomal protein S15a | Homo sapiens |
| 5516      | protein phosphatase 2 (formerly 2A), catalytic subunit, beta isoform                                                                                                                                                 | Homo sapiens |
| 5982      | replication factor C (activator 1) 2, 40kDa                                                                                                                                                                          | Homo sapiens |
| 5571      | protein kinase, AMP-activated, gamma 1 non-catalytic subunit                                                                                                                                                         | Homo sapiens |
| 3054      | host cell factor C1 (VP16-accessory protein)                                                                                                                                                                         | Homo sapiens |
| 7078      | TIMP metalloproteinase inhibitor 3                                                                                                                                                                                   | Homo sapiens |
| 10053     | adaptor-related protein complex 1, mu 2 subunit                                                                                                                                                                      | Homo sapiens |
| 23412     | COMM domain containing 3                                                                                                                                                                                             | Homo sapiens |
| 23039     | exportin 7                                                                                                                                                                                                           | Homo sapiens |
| 3920      | lysosomal-associated membrane protein 2                                                                                                                                                                              | Homo sapiens |
| 340348    | tetraspanin 33                                                                                                                                                                                                       | Homo sapiens |
| 8883      | NEDD8 activating enzyme E1 subunit 1                                                                                                                                                                                 | Homo sapiens |
| 4040      | low density lipoprotein receptor-related protein 6                                                                                                                                                                   | Homo sapiens |
| 50628     | gem (nuclear organelle) associated protein 4                                                                                                                                                                         | Homo sapiens |
| 6050      | ribonuclease/angiogenin inhibitor 1                                                                                                                                                                                  | Homo sapiens |
| 5683      | proteasome (prosome, macropain) subunit, alpha type, 2                                                                                                                                                               | Homo sapiens |
| 8476      | CDC42 binding protein kinase alpha (DMPK-like)                                                                                                                                                                       | Homo sapiens |
| 57175     | coronin, actin binding protein, 1B                                                                                                                                                                                   | Homo sapiens |
| 5700      | proteasome (prosome, macropain) 26S subunit, ATPase, 1; similar to protease (prosome, macropain) 26S subunit, ATPase 1                                                                                               | Homo sapiens |
| 2191      | fibroblast activation protein, alpha                                                                                                                                                                                 | Homo sapiens |
| 4734      | neural precursor cell expressed, developmentally down-regulated 4                                                                                                                                                    | Homo sapiens |
| 22884     | WD repeat domain 37                                                                                                                                                                                                  | Homo sapiens |
| 55041     | pleckstrin homology domain containing, family B (evectins) member 2                                                                                                                                                  | Homo sapiens |
| 144402    | copine VIII                                                                                                                                                                                                          | Homo sapiens |
| 6726      | signal recognition particle 9-like 1; signal recognition particle 9kDa                                                                                                                                               | Homo sapiens |
| 5226      | phosphogluconate dehydrogenase                                                                                                                                                                                       | Homo sapiens |
| 5931      | retinoblastoma binding protein 7                                                                                                                                                                                     | Homo sapiens |
| 754       | pituitary tumor-transforming 1 interacting protein                                                                                                                                                                   | Homo sapiens |
| 8773      | synaptosomal-associated protein, 23kDa                                                                                                                                                                               | Homo sapiens |
| 25824     | peroxiredoxin 5                                                                                                                                                                                                      | Homo sapiens |

|        |                                                                                                      |              |
|--------|------------------------------------------------------------------------------------------------------|--------------|
| 10556  | ribonuclease P/MRP 30kDa subunit                                                                     | Homo sapiens |
| 6634   | small nuclear ribonucleoprotein D3 polypeptide 18kDa                                                 | Homo sapiens |
| 23370  | Rho/Rac guanine nucleotide exchange factor (GEF) 18                                                  | Homo sapiens |
| 1642   | damage-specific DNA binding protein 1, 127kDa                                                        | Homo sapiens |
| 5714   | proteasome (prosome, macropain) 26S subunit, non-ATPase, 8                                           | Homo sapiens |
| 53615  | methyl-CpG binding domain protein 3                                                                  | Homo sapiens |
| 7264   | tissue specific transplantation antigen P35B                                                         | Homo sapiens |
| 8828   | neuropilin 2                                                                                         | Homo sapiens |
| 10466  | component of oligomeric golgi complex 5                                                              | Homo sapiens |
| 57551  | TAO kinase 1                                                                                         | Homo sapiens |
| 4904   | Y box binding protein 1                                                                              | Homo sapiens |
| 63893  | ubiquitin-conjugating enzyme E20                                                                     | Homo sapiens |
| 4249   | mannosyl (alpha-1,6-)-glycoprotein beta-1,6-N-acetyl-glucosaminyltransferase; hypothetical LOC151162 | Homo sapiens |
| 7443   | vaccinia related kinase 1                                                                            | Homo sapiens |
| 7398   | ubiquitin specific peptidase 1                                                                       | Homo sapiens |
| 7375   | ubiquitin specific peptidase 4 (proto-oncogene)                                                      | Homo sapiens |
| 30011  | SH3-domain kinase binding protein 1                                                                  | Homo sapiens |
| 56992  | kinesin family member 15                                                                             | Homo sapiens |
| 4478   | moesin                                                                                               | Homo sapiens |
| 2817   | glypican 1                                                                                           | Homo sapiens |
| 4017   | lysyl oxidase-like 2                                                                                 | Homo sapiens |
| 2590   | UDP-N-acetyl-alpha-D-galactosamine:polypeptide N-acetylgalactosaminyltransferase 2 (GalNAc-T2)       | Homo sapiens |
| 6499   | superkiller viralicidic activity 2-like (S. cerevisiae)                                              | Homo sapiens |
| 2264   | fibroblast growth factor receptor 4                                                                  | Homo sapiens |
| 257364 | sorting nexin 33                                                                                     | Homo sapiens |
| 8667   | eukaryotic translation initiation factor 3, subunit H                                                | Homo sapiens |
| 51429  | sorting nexin 9                                                                                      | Homo sapiens |
| 26052  | dynammin 3                                                                                           | Homo sapiens |
| 5356   | pleiotropic regulator 1 (PRL1 homolog, Arabidopsis)                                                  | Homo sapiens |
| 6223   | ribosomal protein S19 pseudogene 3; ribosomal protein S19                                            | Homo sapiens |
| 548596 | creatine kinase, mitochondrial 1A; creatine kinase, mitochondrial 1B                                 | Homo sapiens |
| 1159   | creatine kinase, mitochondrial 1A; creatine kinase, mitochondrial 1B                                 | Homo sapiens |
| 84034  | elastin microfibril interfacier 2                                                                    | Homo sapiens |
| 4691   | nucleolin                                                                                            | Homo sapiens |
| 7018   | transferrin                                                                                          | Homo sapiens |
| 6155   | ribosomal protein L27                                                                                | Homo sapiens |
| 4173   | minichromosome maintenance complex component 4                                                       | Homo sapiens |
| 5701   | proteasome (prosome, macropain) 26S subunit, ATPase, 2                                               | Homo sapiens |
| 5710   | proteasome (prosome, macropain) 26S subunit, non-ATPase, 4                                           | Homo sapiens |
| 5048   | platelet-activating factor acetylhydrolase, isoform 1b, subunit 1 (45kDa)                            | Homo sapiens |
| 7001   | peroxiredoxin 2                                                                                      | Homo sapiens |
| 5878   | RAB5C, member RAS oncogene family                                                                    | Homo sapiens |
| 10916  | melanoma antigen family D, 2                                                                         | Homo sapiens |
| 3485   | insulin-like growth factor binding protein 2, 36kDa                                                  | Homo sapiens |
| 11252  | protein kinase C and casein kinase substrate in neurons 2                                            | Homo sapiens |
| 375790 | agrin                                                                                                | Homo sapiens |
| 1289   | collagen, type V, alpha 1                                                                            | Homo sapiens |
