# Supplementary material for: Identification and Characterization of 293T Cell-Derived Exosomes by Profiling the Protein, mRNA and MicroRNA Components
Source: PubMed Central journal article supplement (PMC5029934; doi:10.1371/journal.pone.0163043), 2016-09-20
Supplement: pone.0163043.s004.pdf [file pone.0163043.s004.pdf]

| ENTREZ_GENE_ID | Name                                                                                                                                                                         | Species      |
|----------------|------------------------------------------------------------------------------------------------------------------------------------------------------------------------------|--------------|
| 63897          | HEAT repeat containing 6                                                                                                                                                     | Homo sapiens |
| 26057          | ankyrin repeat domain 17                                                                                                                                                     | Homo sapiens |
| 55295          | kelch-like 26 (Drosophila)                                                                                                                                                   | Homo sapiens |
| 5822           | PWP2 periodic tryptophan protein homolog (yeast)                                                                                                                             | Homo sapiens |
| 341315         | poly(A) binding protein, cytoplasmic pseudogene 5; poly(A) binding protein, cytoplasmic 1                                                                                    | Homo sapiens |
| 4753           | NEL-like 2 (chicken)                                                                                                                                                         | Homo sapiens |
| 100128526      | hypothetical LOC100128526; target of myb1 (chicken)                                                                                                                          | Homo sapiens |
| 64895          | poly(A) polymerase gamma                                                                                                                                                     | Homo sapiens |
| 57405          | SPC25, NDC80 kinetochore complex component, homolog (S. cerevisiae)                                                                                                          | Homo sapiens |
| 9282           | mediator complex subunit 14                                                                                                                                                  | Homo sapiens |
| 84057          | meiotic nuclear divisions 1 homolog (S. cerevisiae)                                                                                                                          | Homo sapiens |
| 5394           | exosome component 10                                                                                                                                                         | Homo sapiens |
| 81610          | family with sequence similarity 83, member D                                                                                                                                 | Homo sapiens |
| 400058         | makorin ring finger protein pseudogene 6; makorin ring finger protein 1                                                                                                      | Homo sapiens |
| 23424          | tudor domain containing 7                                                                                                                                                    | Homo sapiens |
| 155370         | Shwachman-Bodian-Diamond syndrome pseudogene; Shwachman-Bodian-Diamond syndrome                                                                                              | Homo sapiens |
| 100129553      | ribosomal protein L13a pseudogene 7; ribosomal protein L13a pseudogene 5; ribosomal protein L13a pseudogene 16; ribosomal protein L13a; ribosomal protein L13a pseudogene 18 | Homo sapiens |
| 284821         | ribosomal protein L13a pseudogene 7; ribosomal protein L13a pseudogene 5; ribosomal protein L13a pseudogene 16; ribosomal protein L13a; ribosomal protein L13a pseudogene 18 | Homo sapiens |
| 728658         | ribosomal protein L13a pseudogene 7; ribosomal protein L13a pseudogene 5; ribosomal protein L13a pseudogene 16; ribosomal protein L13a; ribosomal protein L13a pseudogene 18 | Homo sapiens |
| 402342         | ribosomal protein L13a pseudogene 7; ribosomal protein L13a pseudogene 5; ribosomal protein L13a pseudogene 16; ribosomal protein L13a; ribosomal protein L13a pseudogene 18 | Homo sapiens |
| 79187          | fibronectin type III and SPRY domain containing 1                                                                                                                            | Homo sapiens |
| 5789           | protein tyrosine phosphatase, receptor type, D                                                                                                                               | Homo sapiens |
| 653199         | family with sequence similarity 115, member A; family with sequence similarity 115, member B (pseudogene)                                                                    | Homo sapiens |
| 642443         | alcohol dehydrogenase 5 (class III), chi polypeptide, pseudogene 4; alcohol dehydrogenase 5 (class III), chi polypeptide                                                     | Homo sapiens |
| 7403           | lysine (K)-specific demethylase 6A                                                                                                                                           | Homo sapiens |
| 149224         | ribosomal protein S7; ribosomal protein S7 pseudogene 11; ribosomal protein S7 pseudogene 4; ribosomal protein S7 pseudogene 10                                              | Homo sapiens |
| 100128060      | ribosomal protein S7; ribosomal protein S7 pseudogene 11; ribosomal protein S7 pseudogene 4; ribosomal protein S7 pseudogene 10                                              | Homo sapiens |
| 644315         | ribosomal protein S7; ribosomal protein S7 pseudogene 11; ribosomal protein S7 pseudogene 4; ribosomal protein S7 pseudogene 10                                              | Homo sapiens |
| 283373         | ankyrin repeat domain 52                                                                                                                                                     | Homo sapiens |
| 654350         | ribosomal protein L9; ribosomal protein L9 pseudogene 25                                                                                                                     | Homo sapiens |
| 84301          | DDI1, DNA-damage inducible 1, homolog 2 (S. cerevisiae)                                                                                                                      | Homo sapiens |
| 8861           | LIM domain binding 1                                                                                                                                                         | Homo sapiens |
| 8100           | intraflagellar transport 88 homolog (Chlamydomonas)                                                                                                                          | Homo sapiens |
| 647033         | proliferation-associated 2G4, 38kDa; proliferation-associated 2G4 pseudogene 4                                                                                               | Homo sapiens |
| 8872           | cell division cycle 123 homolog (S. cerevisiae)                                                                                                                              | Homo sapiens |
| 7146           | tenascin XB; tenascin XA pseudogene                                                                                                                                          | Homo sapiens |
| 7148           | tenascin XB; tenascin XA pseudogene                                                                                                                                          | Homo sapiens |
| 80746          | tRNA splicing endonuclease 2 homolog (S. cerevisiae)                                                                                                                         | Homo sapiens |
| 5125           | proprotein convertase subtilisin/kexin type 5                                                                                                                                | Homo sapiens |
| 642132         | roundabout, axon guidance receptor, homolog 1 (Drosophila); similar to roundabout 1 isoform b                                                                                | Homo sapiens |
| 6091           | roundabout, axon guidance receptor, homolog 1 (Drosophila); similar to roundabout 1 isoform b                                                                                | Homo sapiens |
| 85377          | MICAL-like 1                                                                                                                                                                 | Homo sapiens |
| 81570          | ClpB caseinolytic peptidase B homolog (E. coli)                                                                                                                              | Homo sapiens |
| 728620         | ribosomal protein L7-like 1; ribosomal protein L7 pseudogene 14; ribosomal protein L7 pseudogene 21; ribosomal protein L7 pseudogene 22; ribosomal protein L7 pseudogene 46  | Homo sapiens |
| 642451         | ribosomal protein L7-like 1; ribosomal protein L7 pseudogene 14; ribosomal protein L7 pseudogene 21; ribosomal protein L7 pseudogene 22; ribosomal protein L7 pseudogene 46  | Homo sapiens |
| 729123         | ribosomal protein L7-like 1; ribosomal protein L7 pseudogene 14; ribosomal protein L7 pseudogene 21; ribosomal protein L7 pseudogene 22; ribosomal protein L7 pseudogene 46  | Homo sapiens |
| 100129743      | ribosomal protein L7-like 1; ribosomal protein L7 pseudogene 14; ribosomal protein L7 pseudogene 21; ribosomal protein L7 pseudogene 22; ribosomal protein L7 pseudogene 46  | Homo sapiens |
| 285855         | ribosomal protein L7-like 1; ribosomal protein L7 pseudogene 14; ribosomal protein L7 pseudogene 21; ribosomal protein L7 pseudogene 22; ribosomal protein L7 pseudogene 46  | Homo sapiens |
| 9202           | zinc finger, MYM-type 4                                                                                                                                                      | Homo sapiens |
| 26065          | LSM14A, SCD6 homolog A (S. cerevisiae)                                                                                                                                       | Homo sapiens |
| 84193          | SET domain containing 3                                                                                                                                                      | Homo sapiens |

|           |                                                                                                                                                                                                                                                     |              |
|-----------|-----------------------------------------------------------------------------------------------------------------------------------------------------------------------------------------------------------------------------------------------------|--------------|
| 9928      | kinesin family member 14                                                                                                                                                                                                                            | Homo sapiens |
| 9377      | cytochrome c oxidase subunit Va                                                                                                                                                                                                                     | Homo sapiens |
| 26043     | UBX domain protein 7                                                                                                                                                                                                                                | Homo sapiens |
| 60528     | elaC homolog 2 (E. coli)                                                                                                                                                                                                                            | Homo sapiens |
| 1300      | collagen, type X, alpha 1                                                                                                                                                                                                                           | Homo sapiens |
| 23118     | mitogen-activated protein kinase kinase kinase 7 interacting protein 2                                                                                                                                                                              | Homo sapiens |
| 6837      | mediator complex subunit 22                                                                                                                                                                                                                         | Homo sapiens |
| 79078     | chromosome 1 open reading frame 50                                                                                                                                                                                                                  | Homo sapiens |
| 1176      | adaptor-related protein complex 3, sigma 1 subunit                                                                                                                                                                                                  | Homo sapiens |
| 25793     | F-box protein 7                                                                                                                                                                                                                                     | Homo sapiens |
| 8637      | ankyrin repeat and KH domain containing 1; ANKHD1-EIF4EBP3 readthrough transcript; eukaryotic translation initiation factor 4E binding protein 3                                                                                                    | Homo sapiens |
| 54882     | ankyrin repeat and KH domain containing 1; ANKHD1-EIF4EBP3 readthrough transcript; eukaryotic translation initiation factor 4E binding protein 3                                                                                                    | Homo sapiens |
| 404734    | ankyrin repeat and KH domain containing 1; ANKHD1-EIF4EBP3 readthrough transcript; eukaryotic translation initiation factor 4E binding protein 3                                                                                                    | Homo sapiens |
| 22794     | cancer susceptibility candidate 3                                                                                                                                                                                                                   | Homo sapiens |
| 84376     | hook homolog 3 (Drosophila)                                                                                                                                                                                                                         | Homo sapiens |
| 652460    | similar to Plectin 1 (PLTN) (PCN) (Hemidesmosomal protein 1) (HD1); plectin 1, intermediate filament binding protein 500kDa                                                                                                                         | Homo sapiens |
| 23126     | pogo transposable element with ZNF domain                                                                                                                                                                                                           | Homo sapiens |
| 6936      | chromosome 2 open reading frame 3                                                                                                                                                                                                                   | Homo sapiens |
| 7515      | X-ray repair complementing defective repair in Chinese hamster cells 1                                                                                                                                                                              | Homo sapiens |
| 10749     | kinesin family member 1C                                                                                                                                                                                                                            | Homo sapiens |
| 730031    | similar to Afadin (Protein AF-6); myeloid/lymphoid or mixed-lineage leukemia (trithorax homolog, Drosophila); translocated to, 4                                                                                                                    | Homo sapiens |
| 64342     | HCLS1 binding protein 3                                                                                                                                                                                                                             | Homo sapiens |
| 9647      | protein phosphatase 1F (PP2C domain containing)                                                                                                                                                                                                     | Homo sapiens |
| 8242      | lysine (K)-specific demethylase 5C                                                                                                                                                                                                                  | Homo sapiens |
| 79068     | fat mass and obesity associated                                                                                                                                                                                                                     | Homo sapiens |
| 90826     | protein arginine methyltransferase 10 (putative)                                                                                                                                                                                                    | Homo sapiens |
| 9896      | FIG4 homolog (S. cerevisiae)                                                                                                                                                                                                                        | Homo sapiens |
| 79893     | gametogenetin binding protein 2                                                                                                                                                                                                                     | Homo sapiens |
| 6801      | striatin, calmodulin binding protein                                                                                                                                                                                                                | Homo sapiens |
| 1801      | DPH1 homolog (S. cerevisiae)                                                                                                                                                                                                                        | Homo sapiens |
| 150737    | tetratricopeptide repeat domain 30B                                                                                                                                                                                                                 | Homo sapiens |
| 389342    | ribosomal protein L10; ribosomal protein L10 pseudogene 15; ribosomal protein L10 pseudogene 6; ribosomal protein L10 pseudogene 16; ribosomal protein L10 pseudogene 9                                                                             | Homo sapiens |
| 100129975 | ribosomal protein L10; ribosomal protein L10 pseudogene 15; ribosomal protein L10 pseudogene 6; ribosomal protein L10 pseudogene 16; ribosomal protein L10 pseudogene 9                                                                             | Homo sapiens |
| 285176    | ribosomal protein L10; ribosomal protein L10 pseudogene 15; ribosomal protein L10 pseudogene 6; ribosomal protein L10 pseudogene 16; ribosomal protein L10 pseudogene 9                                                                             | Homo sapiens |
| 284393    | ribosomal protein L10; ribosomal protein L10 pseudogene 15; ribosomal protein L10 pseudogene 6; ribosomal protein L10 pseudogene 16; ribosomal protein L10 pseudogene 9                                                                             | Homo sapiens |
| 55095     | sterile alpha motif domain containing 4B                                                                                                                                                                                                            | Homo sapiens |
| 23678     | serum/glucocorticoid regulated kinase family, member 3                                                                                                                                                                                              | Homo sapiens |
| 154796    | angiomin                                                                                                                                                                                                                                            | Homo sapiens |
| 55325     | UFM1-specific peptidase 2                                                                                                                                                                                                                           | Homo sapiens |
| 23636     | nucleoporin 62kDa                                                                                                                                                                                                                                   | Homo sapiens |
| 4898      | nardilysin (N-arginine dibasic convertase)                                                                                                                                                                                                          | Homo sapiens |
| 10629     | TAF6-like RNA polymerase II, p300/CBP-associated factor (PCAF)-associated factor, 65kDa                                                                                                                                                             | Homo sapiens |
| 51096     | UTP18, small subunit (SSU) processome component, homolog (yeast)                                                                                                                                                                                    | Homo sapiens |
| 11167     | folliculin-like 1                                                                                                                                                                                                                                   | Homo sapiens |
| 9337      | CCR4-NOT transcription complex, subunit 8                                                                                                                                                                                                           | Homo sapiens |
| 200576    | phosphoinositide kinase, FYVE finger containing                                                                                                                                                                                                     | Homo sapiens |
| 116138    | kelch domain containing 3                                                                                                                                                                                                                           | Homo sapiens |
| 55621     | TRM1 tRNA methyltransferase 1 homolog (S. cerevisiae)                                                                                                                                                                                               | Homo sapiens |
| 3026      | hyaluronan binding protein 2                                                                                                                                                                                                                        | Homo sapiens |
| 221830    | TWIST neighbor                                                                                                                                                                                                                                      | Homo sapiens |
| 644029    | ribosomal protein L7a pseudogene 70; ribosomal protein L7a; ribosomal protein L7a pseudogene 30; ribosomal protein L7a pseudogene 66; ribosomal protein L7a pseudogene 27; ribosomal protein L7a pseudogene 11; ribosomal protein L7a pseudogene 62 | Homo sapiens |
| 152663    | ribosomal protein L7a pseudogene 70; ribosomal protein L7a; ribosomal protein L7a pseudogene 30; ribosomal protein L7a pseudogene 66; ribosomal protein L7a pseudogene 27; ribosomal protein L7a pseudogene 11; ribosomal protein L7a pseudogene 62 | Homo sapiens |
| 728139    | ribosomal protein L7a pseudogene 70; ribosomal protein L7a; ribosomal protein L7a pseudogene 30; ribosomal protein L7a pseudogene 66; ribosomal protein L7a pseudogene 27; ribosomal protein L7a pseudogene 11; ribosomal protein L7a pseudogene 62 | Homo sapiens |
| 728992    | ribosomal protein L7a pseudogene 70; ribosomal protein L7a; ribosomal protein L7a pseudogene 30; ribosomal protein L7a pseudogene 66; ribosomal protein L7a pseudogene 27; ribosomal protein L7a pseudogene 11; ribosomal protein L7a pseudogene 62 | Homo sapiens |

|           |                                                                                                                                                                                                                                                     |              |
|-----------|-----------------------------------------------------------------------------------------------------------------------------------------------------------------------------------------------------------------------------------------------------|--------------|
| 388474    | ribosomal protein L7a pseudogene 70; ribosomal protein L7a; ribosomal protein L7a pseudogene 30; ribosomal protein L7a pseudogene 66; ribosomal protein L7a pseudogene 27; ribosomal protein L7a pseudogene 11; ribosomal protein L7a pseudogene 62 | Homo sapiens |
| 441034    | ribosomal protein L7a pseudogene 70; ribosomal protein L7a; ribosomal protein L7a pseudogene 30; ribosomal protein L7a pseudogene 66; ribosomal protein L7a pseudogene 27; ribosomal protein L7a pseudogene 11; ribosomal protein L7a pseudogene 62 | Homo sapiens |
| 55102     | ATG2 autophagy related 2 homolog B ( <i>S. cerevisiae</i> )                                                                                                                                                                                         | Homo sapiens |
| 10622     | polymerase (RNA) III (DNA directed) polypeptide G (32kd)                                                                                                                                                                                            | Homo sapiens |
| 54468     | missing oocyte, meiosis regulator, homolog ( <i>Drosophila</i> )                                                                                                                                                                                    | Homo sapiens |
| 27342     | RAB guanine nucleotide exchange factor (GEF) 1                                                                                                                                                                                                      | Homo sapiens |
| 10577     | Niemann-Pick disease, type C2                                                                                                                                                                                                                       | Homo sapiens |
| 11180     | WD repeat domain 6                                                                                                                                                                                                                                  | Homo sapiens |
| 677797    | small nucleolar RNA, H/ACA box 7A; small nucleolar RNA, H/ACA box 7B; ribosomal protein L32                                                                                                                                                         | Homo sapiens |
| 619563    | small nucleolar RNA, H/ACA box 7A; small nucleolar RNA, H/ACA box 7B; ribosomal protein L32                                                                                                                                                         | Homo sapiens |
| 401115    | chromosome 4 open reading frame 48                                                                                                                                                                                                                  | Homo sapiens |
| 728599    | cytokine induced apoptosis inhibitor 1; cytokine induced apoptosis inhibitor 1 pseudogene                                                                                                                                                           | Homo sapiens |
| 57019     | cytokine induced apoptosis inhibitor 1; cytokine induced apoptosis inhibitor 1 pseudogene                                                                                                                                                           | Homo sapiens |
| 5818      | poliovirus receptor-related 1 (herpesvirus entry mediator C)                                                                                                                                                                                        | Homo sapiens |
| 51780     | lysine (K)-specific demethylase 3B                                                                                                                                                                                                                  | Homo sapiens |
| 51611     | DPH5 homolog ( <i>S. cerevisiae</i> )                                                                                                                                                                                                               | Homo sapiens |
| 80173     | intraflagellar transport 74 homolog ( <i>Chlamydomonas</i> )                                                                                                                                                                                        | Homo sapiens |
| 51091     | Sep (O-phosphoserine) tRNA:Sec (selenocysteine) tRNA synthase                                                                                                                                                                                       | Homo sapiens |
| 5426      | polymerase (DNA directed), epsilon                                                                                                                                                                                                                  | Homo sapiens |
| 5157      | platelet-derived growth factor receptor-like                                                                                                                                                                                                        | Homo sapiens |
| 407835    | mitogen-activated protein kinase kinase 2 pseudogene; mitogen-activated protein kinase kinase 2                                                                                                                                                     | Homo sapiens |
| 7342      | upstream binding protein 1 (LBP-1a)                                                                                                                                                                                                                 | Homo sapiens |
| 100129424 | ribosomal protein L19; ribosomal protein L19 pseudogene 12                                                                                                                                                                                          | Homo sapiens |
| 3654      | interleukin-1 receptor-associated kinase 1                                                                                                                                                                                                          | Homo sapiens |
| 285053    | ribosomal protein L18a pseudogene 6; ribosomal protein L18a                                                                                                                                                                                         | Homo sapiens |
| 388076    | ribosomal protein S8; ribosomal protein S8 pseudogene 8; ribosomal protein S8 pseudogene 10                                                                                                                                                         | Homo sapiens |
| 728553    | ribosomal protein S8; ribosomal protein S8 pseudogene 8; ribosomal protein S8 pseudogene 10                                                                                                                                                         | Homo sapiens |
| 57492     | AT rich interactive domain 1B (SWI1-like)                                                                                                                                                                                                           | Homo sapiens |
| 283106    | casein kinase 2, alpha 1 polypeptide pseudogene; casein kinase 2, alpha 1 polypeptide                                                                                                                                                               | Homo sapiens |
| 7536      | splicing factor 1                                                                                                                                                                                                                                   | Homo sapiens |
| 9295      | splicing factor, arginine/serine-rich 11                                                                                                                                                                                                            | Homo sapiens |
| 84991     | RNA binding motif protein 17                                                                                                                                                                                                                        | Homo sapiens |
| 57120     | golgi associated PDZ and coiled-coil motif containing                                                                                                                                                                                               | Homo sapiens |
| 283989    | tRNA splicing endonuclease 54 homolog ( <i>S. cerevisiae</i> )                                                                                                                                                                                      | Homo sapiens |
| 402100    | ribosomal protein L22 pseudogene 11; ribosomal protein L22                                                                                                                                                                                          | Homo sapiens |
| 8030      | coiled-coil domain containing 6                                                                                                                                                                                                                     | Homo sapiens |
| 23022     | palladin, cytoskeletal associated protein                                                                                                                                                                                                           | Homo sapiens |
| 55665     | up-regulated gene 4                                                                                                                                                                                                                                 | Homo sapiens |
| 2072      | excision repair cross-complementing rodent repair deficiency, complementation group 4                                                                                                                                                               | Homo sapiens |
| 55181     | chromosome 17 open reading frame 71                                                                                                                                                                                                                 | Homo sapiens |
| 4854      | Notch homolog 3 ( <i>Drosophila</i> )                                                                                                                                                                                                               | Homo sapiens |
| 23160     | WD repeat domain 43                                                                                                                                                                                                                                 | Homo sapiens |
| 124944    | chromosome 17 open reading frame 49                                                                                                                                                                                                                 | Homo sapiens |
| 84296     | GLNS complex subunit 4 (Sld5 homolog)                                                                                                                                                                                                               | Homo sapiens |
| 57221     | KIAA1244                                                                                                                                                                                                                                            | Homo sapiens |
| 90187     | elastin microfibril interfacier 3                                                                                                                                                                                                                   | Homo sapiens |
| 23210     | jumonji domain containing 6                                                                                                                                                                                                                         | Homo sapiens |
| 442578    | aminoacyl tRNA synthetase complex-interacting multifunctional protein 2; stromal antigen 3-like 3                                                                                                                                                   | Homo sapiens |
| 26993     | A kinase (PRKA) anchor protein 8-like                                                                                                                                                                                                               | Homo sapiens |
| 56950     | SET and MYND domain containing 2                                                                                                                                                                                                                    | Homo sapiens |
| 100093631 | general transcription factor II, i; general transcription factor II, i, pseudogene                                                                                                                                                                  | Homo sapiens |
| 645715    | eukaryotic translation elongation factor 1 alpha-like 7; eukaryotic translation elongation factor 1 alpha-like 3; similar to eukaryotic translation elongation factor 1 alpha 1; eukaryotic translation elongation factor 1 alpha 1                 | Homo sapiens |
| 441032    | eukaryotic translation elongation factor 1 alpha-like 7; eukaryotic translation elongation factor 1 alpha-like 3; similar to eukaryotic translation elongation factor 1 alpha 1; eukaryotic translation elongation factor 1 alpha 1                 | Homo sapiens |
| 23381     | Smg-5 homolog, nonsense mediated mRNA decay factor ( <i>C. elegans</i> )                                                                                                                                                                            | Homo sapiens |
| 729163    | fatty acid binding protein 5-like 2; fatty acid binding protein 5 (psoriasis-associated); fatty acid binding protein 5-like 8; fatty acid binding protein 5-like 7; fatty acid binding protein 5-like 9                                             | Homo sapiens |

|           |                                                                                                                                                                                                                |              |
|-----------|----------------------------------------------------------------------------------------------------------------------------------------------------------------------------------------------------------------|--------------|
| 642956    | fatty acid binding protein 5-like 2; fatty acid binding protein 5 (psoriasis-associated); fatty acid binding protein 5-like 8; fatty acid binding protein 5-like 7; fatty acid binding protein 5-like 9        | Homo sapiens |
| 728729    | fatty acid binding protein 5-like 2; fatty acid binding protein 5 (psoriasis-associated); fatty acid binding protein 5-like 8; fatty acid binding protein 5-like 7; fatty acid binding protein 5-like 9        | Homo sapiens |
| 644877    | similar to calyculin binding protein; calyculin binding protein                                                                                                                                                | Homo sapiens |
| 6654      | son of sevenless homolog 1 (Drosophila)                                                                                                                                                                        | Homo sapiens |
| 200316    | apolipoprotein B mRNA editing enzyme, catalytic polypeptide-like 3F                                                                                                                                            | Homo sapiens |
| 2045      | EPH receptor A7                                                                                                                                                                                                | Homo sapiens |
| 257160    | ring finger protein 214                                                                                                                                                                                        | Homo sapiens |
| 6650      | small optic lobes homolog (Drosophila)                                                                                                                                                                         | Homo sapiens |
| 219927    | mitochondrial ribosomal protein L21                                                                                                                                                                            | Homo sapiens |
| 51550     | cyclin-dependent kinase 2-interacting protein                                                                                                                                                                  | Homo sapiens |
| 10260     | DENN/MADD domain containing 4A                                                                                                                                                                                 | Homo sapiens |
| 148223    | chromosome 19 open reading frame 25                                                                                                                                                                            | Homo sapiens |
| 100133042 | glyceraldehyde-3-phosphate dehydrogenase-like 6; hypothetical protein LOC100133042; glyceraldehyde-3-phosphate dehydrogenase                                                                                   | Homo sapiens |
| 729403    | glyceraldehyde-3-phosphate dehydrogenase-like 6; hypothetical protein LOC100133042; glyceraldehyde-3-phosphate dehydrogenase                                                                                   | Homo sapiens |
| 7090      | transducin-like enhancer of split 3 (E(spl) homolog, Drosophila)                                                                                                                                               | Homo sapiens |
| 9836      | leucine carboxyl methyltransferase 2                                                                                                                                                                           | Homo sapiens |
| 10869     | ubiquitin specific peptidase 19                                                                                                                                                                                | Homo sapiens |
| 8635      | ribonuclease T2                                                                                                                                                                                                | Homo sapiens |
| 100130746 | AKT interacting protein; similar to AKT interacting protein                                                                                                                                                    | Homo sapiens |
| 64400     | AKT interacting protein; similar to AKT interacting protein                                                                                                                                                    | Homo sapiens |
| 7750      | zinc finger, MYM-type 2                                                                                                                                                                                        | Homo sapiens |
| 55248     | transmembrane protein 206                                                                                                                                                                                      | Homo sapiens |
| 10274     | stromal antigen 1                                                                                                                                                                                              | Homo sapiens |
| 653884    | FUS interacting protein (serine/arginine-rich) 1; similar to FUS interacting protein (serine-arginine rich) 1                                                                                                  | Homo sapiens |
| 800       | caldesmon 1                                                                                                                                                                                                    | Homo sapiens |
| 11020     | RAB, member of RAS oncogene family-like 4                                                                                                                                                                      | Homo sapiens |
| 10762     | nucleoporin 50kDa                                                                                                                                                                                              | Homo sapiens |
| 58155     | polypyrimidine tract binding protein 2                                                                                                                                                                         | Homo sapiens |
| 51428     | DEAD (Asp-Glu-Ala-Asp) box polypeptide 41                                                                                                                                                                      | Homo sapiens |
| 79871     | RNA polymerase II associated protein 2                                                                                                                                                                         | Homo sapiens |
| 652797    | similar to Pyruvate kinase, isozymes M1/M2 (Pyruvate kinase muscle isozyme) (Cytosolic thyroid hormone-binding protein) (CTHBP) (THBP1); pyruvate kinase, muscle                                               | Homo sapiens |
| 5001      | origin recognition complex, subunit 5-like (yeast)                                                                                                                                                             | Homo sapiens |
| 285829    | SMT3 suppressor of mif two 3 homolog 2 (S. cerevisiae) pseudogene; SMT3 suppressor of mif two 3 homolog 2 (S. cerevisiae); SMT3 suppressor of mif two 3 homolog 3 (S. cerevisiae)                              | Homo sapiens |
| 23061     | TBC1 domain family, member 9B (with GRAM domain)                                                                                                                                                               | Homo sapiens |
| 5585      | protein kinase N1                                                                                                                                                                                              | Homo sapiens |
| 729789    | ribosomal protein S15 pseudogene 5; ribosomal protein S15                                                                                                                                                      | Homo sapiens |
| 545       | ataxia telangiectasia and Rad3 related; similar to ataxia telangiectasia and Rad3 related protein                                                                                                              | Homo sapiens |
| 648152    | ataxia telangiectasia and Rad3 related; similar to ataxia telangiectasia and Rad3 related protein                                                                                                              | Homo sapiens |
| 651921    | ataxia telangiectasia and Rad3 related; similar to ataxia telangiectasia and Rad3 related protein                                                                                                              | Homo sapiens |
| 23613     | zinc finger, MYND-type containing 8                                                                                                                                                                            | Homo sapiens |
| 653631    | hypothetical LOC653631; hypothetical LOC646050; hypothetical LOC646890; axin interactor, dorsalization associated                                                                                              | Homo sapiens |
| 646050    | hypothetical LOC653631; hypothetical LOC646050; hypothetical LOC646890; axin interactor, dorsalization associated                                                                                              | Homo sapiens |
| 646890    | hypothetical LOC653631; hypothetical LOC646050; hypothetical LOC646890; axin interactor, dorsalization associated                                                                                              | Homo sapiens |
| 22848     | AP2 associated kinase 1                                                                                                                                                                                        | Homo sapiens |
| 23640     | HSPA (heat shock 70kDa) binding protein, cytoplasmic cochaperone 1                                                                                                                                             | Homo sapiens |
| 100133673 | tubulin, gamma 1; similar to Tubulin, gamma 1                                                                                                                                                                  | Homo sapiens |
| 26960     | neurobeachin                                                                                                                                                                                                   | Homo sapiens |
| 1454      | casein kinase 1, epsilon                                                                                                                                                                                       | Homo sapiens |
| 347292    | ribosomal protein L36; ribosomal protein L36 pseudogene 14                                                                                                                                                     | Homo sapiens |
| 64145     | zinc finger, FYVE domain containing 20                                                                                                                                                                         | Homo sapiens |
| 8139      | gigaxonin                                                                                                                                                                                                      | Homo sapiens |
| 6877      | TAF5 RNA polymerase II, TATA box binding protein (TBP)-associated factor, 100kDa                                                                                                                               | Homo sapiens |
| 54780     | non-SMC element 4 homolog A (S. cerevisiae)                                                                                                                                                                    | Homo sapiens |
| 57534     | mindbomb homolog 1 (Drosophila)                                                                                                                                                                                | Homo sapiens |
| 55764     | intraflagellar transport 122 homolog (Chlamydomonas)                                                                                                                                                           | Homo sapiens |
| 11325     | DEAD (Asp-Glu-Ala-Asp) box polypeptide 42                                                                                                                                                                      | Homo sapiens |
| 79912     | pyridine nucleotide-disulphide oxidoreductase domain 1                                                                                                                                                         | Homo sapiens |
| 26155     | nucleolar complex associated 2 homolog (S. cerevisiae)                                                                                                                                                         | Homo sapiens |
| 23560     | GTP binding protein 4                                                                                                                                                                                          | Homo sapiens |
| 100130802 | ribosomal protein L39 pseudogene 10; ribosomal protein L39 pseudogene 20; ribosomal protein L39 pseudogene 27; ribosomal protein L39; ribosomal protein L39 pseudogene 13; ribosomal protein L39 pseudogene 32 | Homo sapiens |

|           |                                                                                                                                                                                                                                              |              |
|-----------|----------------------------------------------------------------------------------------------------------------------------------------------------------------------------------------------------------------------------------------------|--------------|
| 6170      | ribosomal protein L39 pseudogene 10; ribosomal protein L39 pseudogene 20; ribosomal protein L39 pseudogene 27; ribosomal protein L39; ribosomal protein L39 pseudogene 13; ribosomal protein L39 pseudogene 32                               | Homo sapiens |
| 100131160 | ribosomal protein L39 pseudogene 10; ribosomal protein L39 pseudogene 20; ribosomal protein L39 pseudogene 27; ribosomal protein L39; ribosomal protein L39 pseudogene 13; ribosomal protein L39 pseudogene 32                               | Homo sapiens |
| 100131387 | ribosomal protein L39 pseudogene 10; ribosomal protein L39 pseudogene 20; ribosomal protein L39 pseudogene 27; ribosomal protein L39; ribosomal protein L39 pseudogene 13; ribosomal protein L39 pseudogene 32                               | Homo sapiens |
| 100129952 | ribosomal protein L39 pseudogene 10; ribosomal protein L39 pseudogene 20; ribosomal protein L39 pseudogene 27; ribosomal protein L39; ribosomal protein L39 pseudogene 13; ribosomal protein L39 pseudogene 32                               | Homo sapiens |
| 100133222 | ribosomal protein L39 pseudogene 10; ribosomal protein L39 pseudogene 20; ribosomal protein L39 pseudogene 27; ribosomal protein L39; ribosomal protein L39 pseudogene 13; ribosomal protein L39 pseudogene 32                               | Homo sapiens |
| 728698    | similar to eukaryotic translation initiation factor 4A; small nucleolar RNA, H/ACA box 67; eukaryotic translation initiation factor 4A, isoform 1                                                                                            | Homo sapiens |
| 26781     | similar to eukaryotic translation initiation factor 4A; small nucleolar RNA, H/ACA box 67; eukaryotic translation initiation factor 4A, isoform 1                                                                                            | Homo sapiens |
| 546       | alpha thalassemia/mental retardation syndrome X-linked (RAD54 homolog, <i>S. cerevisiae</i> )                                                                                                                                                | Homo sapiens |
| 5937      | RNA binding motif, single stranded interacting protein 1                                                                                                                                                                                     | Homo sapiens |
| 84002     | UDP-GlcNAc:betaGal beta-1,3-N-acetylglucosaminyltransferase 5                                                                                                                                                                                | Homo sapiens |
| 55757     | UDP-glucose ceramide glucosyltransferase-like 2                                                                                                                                                                                              | Homo sapiens |
| 440434    | hypothetical protein FLJ11822; aminopeptidase puromycin sensitive                                                                                                                                                                            | Homo sapiens |
| 93664     | Ca <sup>++</sup> -dependent secretion activator 2                                                                                                                                                                                            | Homo sapiens |
| 84889     | solute carrier family 7 (cationic amino acid transporter, y <sup>+</sup> system), member 3                                                                                                                                                   | Homo sapiens |
| 8896      | BUD31 homolog ( <i>S. cerevisiae</i> )                                                                                                                                                                                                       | Homo sapiens |
| 23291     | F-box and WD repeat domain containing 11                                                                                                                                                                                                     | Homo sapiens |
| 126792    | UDP-Gal:betaGal beta 1,3-galactosyltransferase polypeptide 6                                                                                                                                                                                 | Homo sapiens |
| 2186      | bromodomain PHD finger transcription factor                                                                                                                                                                                                  | Homo sapiens |
| 65080     | mitochondrial ribosomal protein L44                                                                                                                                                                                                          | Homo sapiens |
| 54205     | cytochrome c, somatic                                                                                                                                                                                                                        | Homo sapiens |
| 51367     | processing of precursor 5, ribonuclease P/MRP subunit ( <i>S. cerevisiae</i> )                                                                                                                                                               | Homo sapiens |
| 10076     | protein tyrosine phosphatase, receptor type, U                                                                                                                                                                                               | Homo sapiens |
| 5162      | pyruvate dehydrogenase (lipoamide) beta                                                                                                                                                                                                      | Homo sapiens |
| 648000    | ribosomal protein L7 pseudogene 26; ribosomal protein L7 pseudogene 16; ribosomal protein L7; ribosomal protein L7 pseudogene 32; ribosomal protein L7 pseudogene 23; ribosomal protein L7 pseudogene 24; ribosomal protein L7 pseudogene 20 | Homo sapiens |
| 728843    | ribosomal protein L7 pseudogene 26; ribosomal protein L7 pseudogene 16; ribosomal protein L7; ribosomal protein L7 pseudogene 32; ribosomal protein L7 pseudogene 23; ribosomal protein L7 pseudogene 24; ribosomal protein L7 pseudogene 20 | Homo sapiens |
| 729677    | ribosomal protein L7 pseudogene 26; ribosomal protein L7 pseudogene 16; ribosomal protein L7; ribosomal protein L7 pseudogene 32; ribosomal protein L7 pseudogene 23; ribosomal protein L7 pseudogene 24; ribosomal protein L7 pseudogene 20 | Homo sapiens |
| 728380    | ribosomal protein L7 pseudogene 26; ribosomal protein L7 pseudogene 16; ribosomal protein L7; ribosomal protein L7 pseudogene 32; ribosomal protein L7 pseudogene 23; ribosomal protein L7 pseudogene 24; ribosomal protein L7 pseudogene 20 | Homo sapiens |
| 100130892 | ribosomal protein L7 pseudogene 26; ribosomal protein L7 pseudogene 16; ribosomal protein L7; ribosomal protein L7 pseudogene 32; ribosomal protein L7 pseudogene 23; ribosomal protein L7 pseudogene 24; ribosomal protein L7 pseudogene 20 | Homo sapiens |
| 100127893 | ribosomal protein L7 pseudogene 26; ribosomal protein L7 pseudogene 16; ribosomal protein L7; ribosomal protein L7 pseudogene 32; ribosomal protein L7 pseudogene 23; ribosomal protein L7 pseudogene 24; ribosomal protein L7 pseudogene 20 | Homo sapiens |
| 286512    | similar to eukaryotic translation initiation factor 4A2; eukaryotic translation initiation factor 4A, isoform 2                                                                                                                              | Homo sapiens |
| 100133234 | SET binding factor 1; SET binding factor 1 pseudogene 1                                                                                                                                                                                      | Homo sapiens |
| 4216      | mitogen-activated protein kinase kinase kinase 4                                                                                                                                                                                             | Homo sapiens |
| 9785      | DEAH (Asp-Glu-Ala-His) box polypeptide 38                                                                                                                                                                                                    | Homo sapiens |
| 51397     | COMM domain containing 10                                                                                                                                                                                                                    | Homo sapiens |
| 58485     | trafficking protein particle complex 1                                                                                                                                                                                                       | Homo sapiens |
| 81050     | olfactory receptor, family 5, subfamily AC, member 2                                                                                                                                                                                         | Homo sapiens |
| 647150    | similar to ATP-binding cassette, sub-family E, member 1; ATP-binding cassette, sub-family E (OABP), member 1                                                                                                                                 | Homo sapiens |
| 8479      | HIRA interacting protein 3                                                                                                                                                                                                                   | Homo sapiens |
| 10621     | polymerase (RNA) III (DNA directed) polypeptide F, 39 kDa                                                                                                                                                                                    | Homo sapiens |
| 5469      | mediator complex subunit 1                                                                                                                                                                                                                   | Homo sapiens |
| 26528     | DAZ associated protein 1                                                                                                                                                                                                                     | Homo sapiens |
| 29062     | WD repeat domain 91                                                                                                                                                                                                                          | Homo sapiens |
| 54617     | IN080 homolog ( <i>S. cerevisiae</i> )                                                                                                                                                                                                       | Homo sapiens |
| 80007     | chromosome 10 open reading frame 88                                                                                                                                                                                                          | Homo sapiens |
| 701       | budding uninhibited by benzimidazoles 1 homolog beta (yeast)                                                                                                                                                                                 | Homo sapiens |
| 80144     | Fraser syndrome 1                                                                                                                                                                                                                            | Homo sapiens |

|           |                                                                                                                                                                                                                                                            |              |
|-----------|------------------------------------------------------------------------------------------------------------------------------------------------------------------------------------------------------------------------------------------------------------|--------------|
| 55683     | KIAA1310                                                                                                                                                                                                                                                   | Homo sapiens |
| 100133829 | similar to hCG1991431; similar to COMPase; ADAM metallopeptidase with thrombospondin type 1 motif, 7                                                                                                                                                       | Homo sapiens |
| 11173     | similar to hCG1991431; similar to COMPase; ADAM metallopeptidase with thrombospondin type 1 motif, 7                                                                                                                                                       | Homo sapiens |
| 642935    | similar to hCG1991431; similar to COMPase; ADAM metallopeptidase with thrombospondin type 1 motif, 7                                                                                                                                                       | Homo sapiens |
| 122553    | trafficking protein particle complex 6B                                                                                                                                                                                                                    | Homo sapiens |
| 29781     | non-SMC condensin II complex, subunit H2                                                                                                                                                                                                                   | Homo sapiens |
| 65220     | NAD kinase                                                                                                                                                                                                                                                 | Homo sapiens |
| 8208      | chromatin assembly factor 1, subunit B (p60)                                                                                                                                                                                                               | Homo sapiens |
| 644422    | splicing factor, arginine/serine-rich 6; similar to arginine/serine-rich splicing factor 6                                                                                                                                                                 | Homo sapiens |
| 130773    | ribosomal protein L23a pseudogene 63; ribosomal protein L23a pseudogene 75; ribosomal protein L23a pseudogene 37; ribosomal protein L23a pseudogene 65; ribosomal protein L23a pseudogene 43; ribosomal protein L23a pseudogene 44; ribosomal protein L23a | Homo sapiens |
| 729798    | ribosomal protein L23a pseudogene 63; ribosomal protein L23a pseudogene 75; ribosomal protein L23a pseudogene 37; ribosomal protein L23a pseudogene 65; ribosomal protein L23a pseudogene 43; ribosomal protein L23a pseudogene 44; ribosomal protein L23a | Homo sapiens |
| 389101    | ribosomal protein L23a pseudogene 63; ribosomal protein L23a pseudogene 75; ribosomal protein L23a pseudogene 37; ribosomal protein L23a pseudogene 65; ribosomal protein L23a pseudogene 43; ribosomal protein L23a pseudogene 44; ribosomal protein L23a | Homo sapiens |
| 728207    | ribosomal protein L23a pseudogene 63; ribosomal protein L23a pseudogene 75; ribosomal protein L23a pseudogene 37; ribosomal protein L23a pseudogene 65; ribosomal protein L23a pseudogene 43; ribosomal protein L23a pseudogene 44; ribosomal protein L23a | Homo sapiens |
| 440027    | ribosomal protein L23a pseudogene 63; ribosomal protein L23a pseudogene 75; ribosomal protein L23a pseudogene 37; ribosomal protein L23a pseudogene 65; ribosomal protein L23a pseudogene 43; ribosomal protein L23a pseudogene 44; ribosomal protein L23a | Homo sapiens |
| 391825    | ribosomal protein L23a pseudogene 63; ribosomal protein L23a pseudogene 75; ribosomal protein L23a pseudogene 37; ribosomal protein L23a pseudogene 65; ribosomal protein L23a pseudogene 43; ribosomal protein L23a pseudogene 44; ribosomal protein L23a | Homo sapiens |
| 100129500 | hypothetical LOC100129500; apolipoprotein E                                                                                                                                                                                                                | Homo sapiens |
| 4116      | mago-nashi homolog, proliferation-associated (Drosophila)                                                                                                                                                                                                  | Homo sapiens |
| 9972      | nucleoporin 153kDa                                                                                                                                                                                                                                         | Homo sapiens |
| 1948      | ephrin-B2                                                                                                                                                                                                                                                  | Homo sapiens |
| 158345    | ribosomal protein L4; ribosomal protein L4 pseudogene 5; ribosomal protein L4 pseudogene 4                                                                                                                                                                 | Homo sapiens |
| 647276    | ribosomal protein L4; ribosomal protein L4 pseudogene 5; ribosomal protein L4 pseudogene 4                                                                                                                                                                 | Homo sapiens |
| 150684    | copper metabolism (Murr1) domain containing 1                                                                                                                                                                                                              | Homo sapiens |
| 4502      | metallothionein 2A                                                                                                                                                                                                                                         | Homo sapiens |
| 6594      | SWI/SNF related, matrix associated, actin dependent regulator of chromatin, subfamily a, member 1                                                                                                                                                          | Homo sapiens |
| 84128     | WD repeat domain 75                                                                                                                                                                                                                                        | Homo sapiens |
| 7844      | vacuolar protein sorting 24 homolog (S. cerevisiae); ring finger protein 103                                                                                                                                                                               | Homo sapiens |
| 6885      | mitogen-activated protein kinase kinase kinase 7                                                                                                                                                                                                           | Homo sapiens |
| 11004     | kinesin family member 2C                                                                                                                                                                                                                                   | Homo sapiens |
| 23312     | Dmx-like 2                                                                                                                                                                                                                                                 | Homo sapiens |
| 9797      | TatD DNase domain containing 2                                                                                                                                                                                                                             | Homo sapiens |
| 1455      | casein kinase 1, gamma 2                                                                                                                                                                                                                                   | Homo sapiens |
| 79441     | HAUS augmin-like complex, subunit 3                                                                                                                                                                                                                        | Homo sapiens |
| 9817      | kelch-like ECH-associated protein 1                                                                                                                                                                                                                        | Homo sapiens |
| 92799     | SH3KBP1 binding protein 1                                                                                                                                                                                                                                  | Homo sapiens |
| 23287     | ATP/GTP binding protein 1                                                                                                                                                                                                                                  | Homo sapiens |
| 118426    | loss of heterozygosity, 12, chromosomal region 1                                                                                                                                                                                                           | Homo sapiens |
| 6873      | TAF2 RNA polymerase II, TATA box binding protein (TBP)-associated factor, 150kDa                                                                                                                                                                           | Homo sapiens |
| 80821     | DDHD domain containing 1                                                                                                                                                                                                                                   | Homo sapiens |
| 9094      | unc-119 homolog (C. elegans)                                                                                                                                                                                                                               | Homo sapiens |
| 9369      | neurexin 3                                                                                                                                                                                                                                                 | Homo sapiens |
| 285741    | similar to tumor protein, translationally-controlled 1; tumor protein, translationally-controlled 1                                                                                                                                                        | Homo sapiens |
| 389787    | similar to tumor protein, translationally-controlled 1; tumor protein, translationally-controlled 1                                                                                                                                                        | Homo sapiens |
| 25843     | MOB1, Mps One Binder kinase activator-like 3 (yeast)                                                                                                                                                                                                       | Homo sapiens |
| 4247      | mannosyl (alpha-1,6-)-glycoprotein beta-1,2-N-acetylglucosaminyltransferase                                                                                                                                                                                | Homo sapiens |
| 2581      | galactosylceramidase                                                                                                                                                                                                                                       | Homo sapiens |
| 79074     | chromosome 2 open reading frame 49                                                                                                                                                                                                                         | Homo sapiens |
| 29886     | sorting nexin 8                                                                                                                                                                                                                                            | Homo sapiens |
| 26058     | GRB10 interacting GYF protein 2                                                                                                                                                                                                                            | Homo sapiens |
| 203228    | chromosome 9 open reading frame 72                                                                                                                                                                                                                         | Homo sapiens |
| 79465     | UL16 binding protein 3                                                                                                                                                                                                                                     | Homo sapiens |
| 84196     | ubiquitin specific peptidase 48                                                                                                                                                                                                                            | Homo sapiens |
| 171568    | polymerase (RNA) III (DNA directed) polypeptide H (22.9kD)                                                                                                                                                                                                 | Homo sapiens |

|           |                                                                                                                                                                                                                                                                                                                            |              |
|-----------|----------------------------------------------------------------------------------------------------------------------------------------------------------------------------------------------------------------------------------------------------------------------------------------------------------------------------|--------------|
| 729991    | hypothetical protein LOC729991                                                                                                                                                                                                                                                                                             | Homo sapiens |
| 2975      | general transcription factor IIIC, polypeptide 1, alpha 220kDa                                                                                                                                                                                                                                                             | Homo sapiens |
| 100290337 | similar to damage-specific DNA binding protein 1                                                                                                                                                                                                                                                                           | Homo sapiens |
| 414153    | small nuclear ribonucleoprotein polypeptide E-like 1; small nuclear ribonucleoprotein polypeptide E; similar to hCG23490                                                                                                                                                                                                   | Homo sapiens |
| 100130109 | small nuclear ribonucleoprotein polypeptide E-like 1; small nuclear ribonucleoprotein polypeptide E; similar to hCG23490                                                                                                                                                                                                   | Homo sapiens |
| 91833     | WD repeat domain 20                                                                                                                                                                                                                                                                                                        | Homo sapiens |
| 9968      | mediator complex subunit 12                                                                                                                                                                                                                                                                                                | Homo sapiens |
| 8379      | MAD1 mitotic arrest deficient-like 1 (yeast)                                                                                                                                                                                                                                                                               | Homo sapiens |
| 246175    | CCR4-NOT transcription complex, subunit 6-like                                                                                                                                                                                                                                                                             | Homo sapiens |
| 5170      | 3-phosphoinositide dependent protein kinase-1                                                                                                                                                                                                                                                                              | Homo sapiens |
| 64320     | ring finger protein 25                                                                                                                                                                                                                                                                                                     | Homo sapiens |
| 1288      | collagen, type IV, alpha 6                                                                                                                                                                                                                                                                                                 | Homo sapiens |
| 643336    | cell division cycle 42 (GTP binding protein, 25kDa); cell division cycle 42 pseudogene 2                                                                                                                                                                                                                                   | Homo sapiens |
| 4702      | NADH dehydrogenase (ubiquinone) 1 alpha subcomplex, 8, 19kDa                                                                                                                                                                                                                                                               | Homo sapiens |
| 220323    | OAF homolog (Drosophila)                                                                                                                                                                                                                                                                                                   | Homo sapiens |
| 5558      | primase, DNA, polypeptide 2 (58kDa)                                                                                                                                                                                                                                                                                        | Homo sapiens |
| 5925      | retinoblastoma 1                                                                                                                                                                                                                                                                                                           | Homo sapiens |
| 11031     | RAB31, member RAS oncogene family                                                                                                                                                                                                                                                                                          | Homo sapiens |
| 80308     | FAD1 flavin adenine dinucleotide synthetase homolog (S. cerevisiae)                                                                                                                                                                                                                                                        | Homo sapiens |
| 90379     | chromosome 19 open reading frame 72                                                                                                                                                                                                                                                                                        | Homo sapiens |
| 5261      | phosphorylase kinase, gamma 2 (testis)                                                                                                                                                                                                                                                                                     | Homo sapiens |
| 4723      | NADH dehydrogenase (ubiquinone) flavoprotein 1, 51kDa                                                                                                                                                                                                                                                                      | Homo sapiens |
| 22926     | activating transcription factor 6                                                                                                                                                                                                                                                                                          | Homo sapiens |
| 10567     | Rab acceptor 1 (prenylated)                                                                                                                                                                                                                                                                                                | Homo sapiens |
| 81846     | SET binding factor 2                                                                                                                                                                                                                                                                                                       | Homo sapiens |
| 55135     | WD repeat containing, antisense to TP53                                                                                                                                                                                                                                                                                    | Homo sapiens |
| 10915     | transcription elongation regulator 1                                                                                                                                                                                                                                                                                       | Homo sapiens |
| 100130902 | thioredoxin reductase 1; hypothetical LOC100130902                                                                                                                                                                                                                                                                         | Homo sapiens |
| 55255     | WD repeat domain 41                                                                                                                                                                                                                                                                                                        | Homo sapiens |
| 7093      | tolloid-like 2                                                                                                                                                                                                                                                                                                             | Homo sapiens |
| 150472    | COBW domain containing 2                                                                                                                                                                                                                                                                                                   | Homo sapiens |
| 645870    | similar to barrier-to-autointegration factor; barrier to autointegration factor 1                                                                                                                                                                                                                                          | Homo sapiens |
| 114823    | leukocyte receptor cluster (LRC) member 8                                                                                                                                                                                                                                                                                  | Homo sapiens |
| 26268     | F-box protein 9                                                                                                                                                                                                                                                                                                            | Homo sapiens |
| 6835      | surfeit 2                                                                                                                                                                                                                                                                                                                  | Homo sapiens |
| 53371     | nucleoporin 54kDa                                                                                                                                                                                                                                                                                                          | Homo sapiens |
| 29924     | epsin 1                                                                                                                                                                                                                                                                                                                    | Homo sapiens |
| 55559     | three prime repair exonuclease 2; HAUS augmin-like complex, subunit 7                                                                                                                                                                                                                                                      | Homo sapiens |
| 11219     | three prime repair exonuclease 2; HAUS augmin-like complex, subunit 7                                                                                                                                                                                                                                                      | Homo sapiens |
| 9135      | rabaptin, RAB GTPase binding effector protein 1                                                                                                                                                                                                                                                                            | Homo sapiens |
| 100131572 | ribosomal protein S27 pseudogene 29; ribosomal protein S27 pseudogene 9; ribosomal protein S27 pseudogene 23; ribosomal protein S27 pseudogene 13; ribosomal protein S27; ribosomal protein S27 pseudogene 21; ribosomal protein S27 pseudogene 7; ribosomal protein S27 pseudogene 6; ribosomal protein S27 pseudogene 19 | Homo sapiens |
| 100132488 | ribosomal protein S27 pseudogene 29; ribosomal protein S27 pseudogene 9; ribosomal protein S27 pseudogene 23; ribosomal protein S27 pseudogene 13; ribosomal protein S27; ribosomal protein S27 pseudogene 21; ribosomal protein S27 pseudogene 7; ribosomal protein S27 pseudogene 6; ribosomal protein S27 pseudogene 19 | Homo sapiens |
| 100131905 | ribosomal protein S27 pseudogene 29; ribosomal protein S27 pseudogene 9; ribosomal protein S27 pseudogene 23; ribosomal protein S27 pseudogene 13; ribosomal protein S27; ribosomal protein S27 pseudogene 21; ribosomal protein S27 pseudogene 7; ribosomal protein S27 pseudogene 6; ribosomal protein S27 pseudogene 19 | Homo sapiens |
| 100130775 | ribosomal protein S27 pseudogene 29; ribosomal protein S27 pseudogene 9; ribosomal protein S27 pseudogene 23; ribosomal protein S27 pseudogene 13; ribosomal protein S27; ribosomal protein S27 pseudogene 21; ribosomal protein S27 pseudogene 7; ribosomal protein S27 pseudogene 6; ribosomal protein S27 pseudogene 19 | Homo sapiens |
| 100130070 | ribosomal protein S27 pseudogene 29; ribosomal protein S27 pseudogene 9; ribosomal protein S27 pseudogene 23; ribosomal protein S27 pseudogene 13; ribosomal protein S27; ribosomal protein S27 pseudogene 21; ribosomal protein S27 pseudogene 7; ribosomal protein S27 pseudogene 6; ribosomal protein S27 pseudogene 19 | Homo sapiens |
| 100129905 | ribosomal protein S27 pseudogene 29; ribosomal protein S27 pseudogene 9; ribosomal protein S27 pseudogene 23; ribosomal protein S27 pseudogene 13; ribosomal protein S27; ribosomal protein S27 pseudogene 21; ribosomal protein S27 pseudogene 7; ribosomal protein S27 pseudogene 6; ribosomal protein S27 pseudogene 19 | Homo sapiens |
| 100132291 | ribosomal protein S27 pseudogene 29; ribosomal protein S27 pseudogene 9; ribosomal protein S27 pseudogene 23; ribosomal protein S27 pseudogene 13; ribosomal protein S27; ribosomal protein S27 pseudogene 21; ribosomal protein S27 pseudogene 7; ribosomal protein S27 pseudogene 6; ribosomal protein S27 pseudogene 19 | Homo sapiens |

|           |                                                                                                                                                                                                                                                                                                                            |              |
|-----------|----------------------------------------------------------------------------------------------------------------------------------------------------------------------------------------------------------------------------------------------------------------------------------------------------------------------------|--------------|
| 100131787 | ribosomal protein S27 pseudogene 29; ribosomal protein S27 pseudogene 9; ribosomal protein S27 pseudogene 23; ribosomal protein S27 pseudogene 13; ribosomal protein S27; ribosomal protein S27 pseudogene 21; ribosomal protein S27 pseudogene 7; ribosomal protein S27 pseudogene 6; ribosomal protein S27 pseudogene 19 | Homo sapiens |
| 29945     | anaphase promoting complex subunit 4                                                                                                                                                                                                                                                                                       | Homo sapiens |
| 50859     | sparc/osteonectin, cwcv and kazal-like domains proteoglycan (testican) 3                                                                                                                                                                                                                                                   | Homo sapiens |
| 8241      | RNA binding motif protein 10                                                                                                                                                                                                                                                                                               | Homo sapiens |
| 57082     | cancer susceptibility candidate 5                                                                                                                                                                                                                                                                                          | Homo sapiens |
| 23767     | fibronectin leucine rich transmembrane protein 3                                                                                                                                                                                                                                                                           | Homo sapiens |
| 51646     | yippee-like 5 (Drosophila)                                                                                                                                                                                                                                                                                                 | Homo sapiens |
| 55330     | cappuccino homolog (mouse)                                                                                                                                                                                                                                                                                                 | Homo sapiens |
| 10714     | polymerase (DNA-directed), delta 3, accessory subunit                                                                                                                                                                                                                                                                      | Homo sapiens |
| 55631     | leucine rich repeat containing 40                                                                                                                                                                                                                                                                                          | Homo sapiens |
| 65083     | nucleolar protein family 6 (RNA-associated)                                                                                                                                                                                                                                                                                | Homo sapiens |
| 388907    | ribosomal protein L5 pseudogene 34; ribosomal protein L5 pseudogene 1; ribosomal protein L5                                                                                                                                                                                                                                | Homo sapiens |
| 647436    | ribosomal protein L5 pseudogene 34; ribosomal protein L5 pseudogene 1; ribosomal protein L5                                                                                                                                                                                                                                | Homo sapiens |
| 400013    | hypothetical gene supported by BC000665; t-complex 1                                                                                                                                                                                                                                                                       | Homo sapiens |
| 10413     | Yes-associated protein 1, 65kDa                                                                                                                                                                                                                                                                                            | Homo sapiens |
| 5296      | phosphoinositide-3-kinase, regulatory subunit 2 (beta)                                                                                                                                                                                                                                                                     | Homo sapiens |
| 9639      | Rho guanine nucleotide exchange factor (GEF) 10                                                                                                                                                                                                                                                                            | Homo sapiens |
| 7043      | transforming growth factor, beta 3                                                                                                                                                                                                                                                                                         | Homo sapiens |
| 54887     | UHRF1 binding protein 1                                                                                                                                                                                                                                                                                                    | Homo sapiens |
| 8482      | semaphorin 7A, GPI membrane anchor (John Milton Hagen blood group)                                                                                                                                                                                                                                                         | Homo sapiens |
| 55051     | chromosome 14 open reading frame 102                                                                                                                                                                                                                                                                                       | Homo sapiens |
| 23765     | interleukin 17 receptor A                                                                                                                                                                                                                                                                                                  | Homo sapiens |
| 60560     | MAK10 homolog, amino-acid N-acetyltransferase subunit (S. cerevisiae)                                                                                                                                                                                                                                                      | Homo sapiens |
| 348180    | chromosome 16 open reading frame 84                                                                                                                                                                                                                                                                                        | Homo sapiens |
| 51124     | immediate early response 3 interacting protein 1                                                                                                                                                                                                                                                                           | Homo sapiens |
| 100128766 | ribosomal protein L8; ribosomal protein L8 pseudogene 2                                                                                                                                                                                                                                                                    | Homo sapiens |
| 136227    | EMI domain containing 2                                                                                                                                                                                                                                                                                                    | Homo sapiens |
| 27238     | G patch domain and KOW motifs                                                                                                                                                                                                                                                                                              | Homo sapiens |
| 4015      | lysyl oxidase                                                                                                                                                                                                                                                                                                              | Homo sapiens |
| 8678      | beclin 1, autophagy related                                                                                                                                                                                                                                                                                                | Homo sapiens |
| 23242     | cordons-bleu homolog (mouse)                                                                                                                                                                                                                                                                                               | Homo sapiens |
| 8945      | beta-transducin repeat containing                                                                                                                                                                                                                                                                                          | Homo sapiens |
| 375298    | ceramide kinase-like                                                                                                                                                                                                                                                                                                       | Homo sapiens |
| 23065     | KIAA0090                                                                                                                                                                                                                                                                                                                   | Homo sapiens |
| 730107    | similar to Glycine cleavage system H protein, mitochondrial precursor; glycine cleavage system protein H (aminomethyl carrier); similar to Glycine cleavage system H protein, mitochondrial                                                                                                                                | Homo sapiens |
| 654085    | similar to Glycine cleavage system H protein, mitochondrial precursor; glycine cleavage system protein H (aminomethyl carrier); similar to Glycine cleavage system H protein, mitochondrial                                                                                                                                | Homo sapiens |
| 729080    | similar to Glycine cleavage system H protein, mitochondrial precursor; glycine cleavage system protein H (aminomethyl carrier); similar to Glycine cleavage system H protein, mitochondrial                                                                                                                                | Homo sapiens |
| 2653      | similar to Glycine cleavage system H protein, mitochondrial precursor; glycine cleavage system protein H (aminomethyl carrier); similar to Glycine cleavage system H protein, mitochondrial                                                                                                                                | Homo sapiens |
| 9070      | ash2 (absent, small, or homeotic)-like (Drosophila)                                                                                                                                                                                                                                                                        | Homo sapiens |
| 1107      | chromodomain helicase DNA binding protein 3                                                                                                                                                                                                                                                                                | Homo sapiens |
| 147179    | WAS/WASL interacting protein family, member 2                                                                                                                                                                                                                                                                              | Homo sapiens |
| 245711    | protein phosphatase 1, catalytic subunit, beta isoform; speedy homolog A (Xenopus laevis)                                                                                                                                                                                                                                  | Homo sapiens |
| 26130     | GTPase activating protein and VPS9 domains 1                                                                                                                                                                                                                                                                               | Homo sapiens |
| 30827     | CXXC finger 1 (PHD domain)                                                                                                                                                                                                                                                                                                 | Homo sapiens |
| 9612      | nuclear receptor co-repressor 2                                                                                                                                                                                                                                                                                            | Homo sapiens |
| 10642     | insulin-like growth factor 2 mRNA binding protein 1                                                                                                                                                                                                                                                                        | Homo sapiens |
| 399804    | nucleophosmin 1 (nucleolar phosphoprotein B23, numatrin) pseudogene 21; hypothetical LOC100131044; similar to nucleophosmin 1; nucleophosmin (nucleolar phosphoprotein B23, numatrin)                                                                                                                                      | Homo sapiens |
| 100129237 | nucleophosmin 1 (nucleolar phosphoprotein B23, numatrin) pseudogene 21; hypothetical LOC100131044; similar to nucleophosmin 1; nucleophosmin (nucleolar phosphoprotein B23, numatrin)                                                                                                                                      | Homo sapiens |
| 440577    | nucleophosmin 1 (nucleolar phosphoprotein B23, numatrin) pseudogene 21; hypothetical LOC100131044; similar to nucleophosmin 1; nucleophosmin (nucleolar phosphoprotein B23, numatrin)                                                                                                                                      | Homo sapiens |
| 729686    | nucleophosmin 1 (nucleolar phosphoprotein B23, numatrin) pseudogene 21; hypothetical LOC100131044; similar to nucleophosmin 1; nucleophosmin (nucleolar phosphoprotein B23, numatrin)                                                                                                                                      | Homo sapiens |
| 100131044 | nucleophosmin 1 (nucleolar phosphoprotein B23, numatrin) pseudogene 21; hypothetical LOC100131044; similar to nucleophosmin 1; nucleophosmin (nucleolar phosphoprotein B23, numatrin)                                                                                                                                      | Homo sapiens |
| 729342    | nucleophosmin 1 (nucleolar phosphoprotein B23, numatrin) pseudogene 21; hypothetical LOC100131044; similar to nucleophosmin 1; nucleophosmin (nucleolar phosphoprotein B23, numatrin)                                                                                                                                      | Homo sapiens |



|           |                                                                                                                                                                                           |              |
|-----------|-------------------------------------------------------------------------------------------------------------------------------------------------------------------------------------------|--------------|
| 729992    | similar to heat shock 70kD protein binding protein; suppression of tumorigenicity 13 (colon carcinoma) (Hsp70 interacting protein)                                                        | Homo sapiens |
| 344328    | similar to heat shock 70kD protein binding protein; suppression of tumorigenicity 13 (colon carcinoma) (Hsp70 interacting protein)                                                        | Homo sapiens |
| 388344    | ribosomal protein L13 pseudogene 12; ribosomal protein L13                                                                                                                                | Homo sapiens |
| 50804     | myelin expression factor 2                                                                                                                                                                | Homo sapiens |
| 84872     | zinc finger CCCH-type containing 10                                                                                                                                                       | Homo sapiens |
| 1730      | diaphanous homolog 2 (Drosophila)                                                                                                                                                         | Homo sapiens |
| 1616      | death-domain associated protein                                                                                                                                                           | Homo sapiens |
| 201965    | RWD domain containing 4A                                                                                                                                                                  | Homo sapiens |
| 51441     | YTH domain family, member 2                                                                                                                                                               | Homo sapiens |
| 79902     | nucleoporin 85kDa                                                                                                                                                                         | Homo sapiens |
| 11152     | WD repeat domain 45                                                                                                                                                                       | Homo sapiens |
| 305       | annexin A2 pseudogene 3; annexin A2; annexin A2 pseudogene 1                                                                                                                              | Homo sapiens |
| 51362     | cell division cycle 40 homolog (S. cerevisiae)                                                                                                                                            | Homo sapiens |
| 53981     | cleavage and polyadenylation specific factor 2, 100kDa                                                                                                                                    | Homo sapiens |
| 58527     | chromosome 6 open reading frame 115                                                                                                                                                       | Homo sapiens |
| 81556     | chromosome 15 open reading frame 44                                                                                                                                                       | Homo sapiens |
| 253943    | YTH domain family, member 3                                                                                                                                                               | Homo sapiens |
| 84343     | Hermansky-Pudlak syndrome 3                                                                                                                                                               | Homo sapiens |
| 10498     | coactivator-associated arginine methyltransferase 1                                                                                                                                       | Homo sapiens |
| 57680     | chromodomain helicase DNA binding protein 8                                                                                                                                               | Homo sapiens |
| 89891     | WD repeat domain 34                                                                                                                                                                       | Homo sapiens |
| 653506    | meteorin, glial cell differentiation regulator-like; similar to meteorin, glial cell differentiation regulator-like                                                                       | Homo sapiens |
| 642513    | similar to Potassium channel tetramerisation domain containing 9; potassium channel tetramerisation domain containing 9; similar to potassium channel tetramerisation domain containing 9 | Homo sapiens |
| 647013    | similar to Potassium channel tetramerisation domain containing 9; potassium channel tetramerisation domain containing 9; similar to potassium channel tetramerisation domain containing 9 | Homo sapiens |
| 54793     | similar to Potassium channel tetramerisation domain containing 9; potassium channel tetramerisation domain containing 9; similar to potassium channel tetramerisation domain containing 9 | Homo sapiens |
| 2146      | enhancer of zeste homolog 2 (Drosophila)                                                                                                                                                  | Homo sapiens |
| 9862      | mediator complex subunit 24                                                                                                                                                               | Homo sapiens |
| 60681     | FK506 binding protein 10, 65 kDa                                                                                                                                                          | Homo sapiens |
| 57186     | chromosome 20 open reading frame 74                                                                                                                                                       | Homo sapiens |
| 9093      | DnaJ (Hsp40) homolog, subfamily A, member 3                                                                                                                                               | Homo sapiens |
| 7189      | TNF receptor-associated factor 6                                                                                                                                                          | Homo sapiens |
| 23649     | polymerase (DNA directed), alpha 2 (70kD subunit)                                                                                                                                         | Homo sapiens |
| 23404     | exosome component 2                                                                                                                                                                       | Homo sapiens |
| 64785     | GLNS complex subunit 3 (Psf3 homolog)                                                                                                                                                     | Homo sapiens |
| 770       | carbonic anhydrase XI                                                                                                                                                                     | Homo sapiens |
| 3161      | hyaluronan-mediated motility receptor (RHAMM)                                                                                                                                             | Homo sapiens |
| 100132364 | NIN1/RPN12 binding protein 1 homolog (S. cerevisiae); hypothetical LOC100132364                                                                                                           | Homo sapiens |
| 28987     | NIN1/RPN12 binding protein 1 homolog (S. cerevisiae); hypothetical LOC100132364                                                                                                           | Homo sapiens |
| 8975      | ubiquitin specific peptidase 13 (isopeptidase T-3)                                                                                                                                        | Homo sapiens |
| 51019     | coiled-coil domain containing 53                                                                                                                                                          | Homo sapiens |
| 151176    | family with sequence similarity 132, member B                                                                                                                                             | Homo sapiens |
| 22879     | MON1 homolog B (yeast)                                                                                                                                                                    | Homo sapiens |
| 2009      | echinoderm microtubule associated protein like 1                                                                                                                                          | Homo sapiens |
| 84315     | MON1 homolog A (yeast)                                                                                                                                                                    | Homo sapiens |
| 55758     | REST corepressor 3                                                                                                                                                                        | Homo sapiens |
| 23264     | zinc finger CCCH-type containing 7B                                                                                                                                                       | Homo sapiens |
| 51008     | activating signal cointegrator 1 complex subunit 1                                                                                                                                        | Homo sapiens |
| 24139     | echinoderm microtubule associated protein like 2                                                                                                                                          | Homo sapiens |
| 54442     | potassium channel tetramerisation domain containing 5                                                                                                                                     | Homo sapiens |
| 3300      | DnaJ (Hsp40) homolog, subfamily B, member 2                                                                                                                                               | Homo sapiens |
| 51361     | hook homolog 1 (Drosophila)                                                                                                                                                               | Homo sapiens |
| 5210      | 6-phosphofructo-2-kinase/fructose-2,6-biphosphatase 4                                                                                                                                     | Homo sapiens |
| 25831     | HECT domain containing 1                                                                                                                                                                  | Homo sapiens |
| 55704     | coiled-coil domain containing 88A                                                                                                                                                         | Homo sapiens |
| 56896     | dihydropyrimidinase-like 5                                                                                                                                                                | Homo sapiens |
| 644390    | similar to heterogeneous nuclear ribonucleoprotein L-like; heterogeneous nuclear ribonucleoprotein L                                                                                      | Homo sapiens |
| 7158      | tumor protein p53 binding protein 1                                                                                                                                                       | Homo sapiens |
| 7248      | tuberous sclerosis 1                                                                                                                                                                      | Homo sapiens |
| 409       | arrestin, beta 2                                                                                                                                                                          | Homo sapiens |
| 10270     | A kinase (PRKA) anchor protein 8                                                                                                                                                          | Homo sapiens |
| 55090     | mediator complex subunit 9                                                                                                                                                                | Homo sapiens |
| 26098     | chromosome 10 open reading frame 137                                                                                                                                                      | Homo sapiens |
| 9330      | general transcription factor IIIC, polypeptide 3, 102kDa                                                                                                                                  | Homo sapiens |
| 9455      | homer homolog 2 (Drosophila)                                                                                                                                                              | Homo sapiens |
| 4350      | N-methylpurine-DNA glycosylase                                                                                                                                                            | Homo sapiens |
| 392437    | similar to ferritin, light polypeptide; ferritin, light polypeptide                                                                                                                       | Homo sapiens |
| 741       | zinc finger, HIT type 2                                                                                                                                                                   | Homo sapiens |
| 9701      | SAPS domain family, member 2                                                                                                                                                              | Homo sapiens |

|        |                                                                                                                                               |              |
|--------|-----------------------------------------------------------------------------------------------------------------------------------------------|--------------|
| 642546 | hexokinase 2 pseudogene; hexokinase 2                                                                                                         | Homo sapiens |
| 3099   | hexokinase 2 pseudogene; hexokinase 2                                                                                                         | Homo sapiens |
| 2175   | Fanconi anemia, complementation group A                                                                                                       | Homo sapiens |
| 55905  | ring finger protein 114                                                                                                                       | Homo sapiens |
| 4849   | CCR4-NOT transcription complex, subunit 3                                                                                                     | Homo sapiens |
| 55297  | coiled-coil domain containing 91                                                                                                              | Homo sapiens |
| 23557  | SNAP-associated protein                                                                                                                       | Homo sapiens |
| 54662  | TBC1 domain family, member 13                                                                                                                 | Homo sapiens |
| 57679  | amyotrophic lateral sclerosis 2 (juvenile)                                                                                                    | Homo sapiens |
| 5321   | phospholipase A2, group IVA (cytosolic, calcium-dependent)                                                                                    | Homo sapiens |
| 79658  | Rho GTPase activating protein 10                                                                                                              | Homo sapiens |
| 28981  | intraflagellar transport 81 homolog (Chlamydomonas)                                                                                           | Homo sapiens |
| 23276  | kelch-like 18 (Drosophila)                                                                                                                    | Homo sapiens |
| 729608 | brix domain containing 1 pseudogene; brix domain containing 1                                                                                 | Homo sapiens |
| 84154  | brix domain containing 1 pseudogene; brix domain containing 1                                                                                 | Homo sapiens |
| 23635  | single-stranded DNA binding protein 2                                                                                                         | Homo sapiens |
| 5439   | polymerase (RNA) II (DNA directed) polypeptide J, 13.3kDa                                                                                     | Homo sapiens |
| 23213  | sulfatase 1                                                                                                                                   | Homo sapiens |
| 84172  | polymerase (RNA) I polypeptide B, 128kDa                                                                                                      | Homo sapiens |
| 57560  | intraflagellar transport 80 homolog (Chlamydomonas)                                                                                           | Homo sapiens |
| 26472  | protein phosphatase 1, regulatory (inhibitor) subunit 14B                                                                                     | Homo sapiens |
| 55907  | cytidine monophosphate N-acetylneuraminic acid synthetase                                                                                     | Homo sapiens |
| 114883 | oxysterol binding protein-like 9                                                                                                              | Homo sapiens |
| 84864  | MYC induced nuclear antigen                                                                                                                   | Homo sapiens |
| 9818   | nucleoporin like 1                                                                                                                            | Homo sapiens |
| 9820   | cullin 7                                                                                                                                      | Homo sapiens |
| 92906  | heterogeneous nuclear ribonucleoprotein L-like                                                                                                | Homo sapiens |
| 149986 | LSM14B, SCD6 homolog B (S. cerevisiae)                                                                                                        | Homo sapiens |
| 197131 | ubiquitin protein ligase E3 component n-recognin 1                                                                                            | Homo sapiens |
| 5130   | phosphate cytidyltransferase 1, choline, alpha                                                                                                | Homo sapiens |
| 116988 | ArfGAP with GTPase domain, ankyrin repeat and PH domain 3                                                                                     | Homo sapiens |
| 4320   | matrix metalloproteinase 11 (stromelysin 3)                                                                                                   | Homo sapiens |
| 7756   | zinc finger protein 207                                                                                                                       | Homo sapiens |
| 79888  | lysophosphatidylcholine acyltransferase 1                                                                                                     | Homo sapiens |
| 91298  | chromosome 12 open reading frame 29                                                                                                           | Homo sapiens |
| 64792  | RAB, member RAS oncogene family-like 5                                                                                                        | Homo sapiens |
| 64802  | nicotinamide nucleotide adenyltransferase 1                                                                                                   | Homo sapiens |
| 56259  | catenin, beta like 1                                                                                                                          | Homo sapiens |
| 10516  | fibulin 5                                                                                                                                     | Homo sapiens |
| 64976  | mitochondrial ribosomal protein L40                                                                                                           | Homo sapiens |
| 51372  | coiled-coil domain containing 72; hypothetical LOC729973; hypothetical LOC728416                                                              | Homo sapiens |
| 728416 | coiled-coil domain containing 72; hypothetical LOC729973; hypothetical LOC728416                                                              | Homo sapiens |
| 729973 | coiled-coil domain containing 72; hypothetical LOC729973; hypothetical LOC728416                                                              | Homo sapiens |
| 1106   | chromodomain helicase DNA binding protein 2                                                                                                   | Homo sapiens |
| 55027  | HEAT repeat containing 3                                                                                                                      | Homo sapiens |
| 55667  | DENN/MADD domain containing 4C                                                                                                                | Homo sapiens |
| 29893  | PSMC3 interacting protein                                                                                                                     | Homo sapiens |
| 645381 | similar to transducin-like enhancer of split 1 (E(spl) homolog, Drosophila); transducin-like enhancer of split 1 (E(spl) homolog, Drosophila) | Homo sapiens |
| 7088   | similar to transducin-like enhancer of split 1 (E(spl) homolog, Drosophila); transducin-like enhancer of split 1 (E(spl) homolog, Drosophila) | Homo sapiens |
| 3908   | laminin, alpha 2                                                                                                                              | Homo sapiens |
| 399511 | transcription elongation factor A (SII), 1 pseudogene 2; transcription elongation factor A (SII), 1                                           | Homo sapiens |
| 1952   | cadherin, EGF LAG seven-pass G-type receptor 2 (flamingo homolog, Drosophila)                                                                 | Homo sapiens |
| 4355   | membrane protein, palmitoylated 2 (MAGUK p55 subfamily member 2)                                                                              | Homo sapiens |
| 9924   | PAN2 poly(A) specific ribonuclease subunit homolog (S. cerevisiae)                                                                            | Homo sapiens |
| 661    | polymerase (RNA) III (DNA directed) polypeptide D, 44kDa                                                                                      | Homo sapiens |
| 285590 | SH3 and PX domains 2B                                                                                                                         | Homo sapiens |
| 389842 | similar to RAN binding protein 1; RAN binding protein 1                                                                                       | Homo sapiens |
| 727803 | similar to RAN binding protein 1; RAN binding protein 1                                                                                       | Homo sapiens |
| 137133 | chromosome 8 open reading frame 62; phosphoserine aminotransferase 1                                                                          | Homo sapiens |
| 84312  | breast cancer metastasis-suppressor 1-like                                                                                                    | Homo sapiens |
| 51530  | zinc finger, C3HC-type containing 1                                                                                                           | Homo sapiens |
| 130617 | zinc finger, AN1-type domain 2B                                                                                                               | Homo sapiens |
| 112939 | nucleus accumbens associated 1, BEN and BTB (POZ) domain containing                                                                           | Homo sapiens |
| 55656  | integrator complex subunit 8                                                                                                                  | Homo sapiens |
| 23411  | sirtuin (silent mating type information regulation 2 homolog) 1 (S. cerevisiae)                                                               | Homo sapiens |
| 729389 | ribosomal protein S6 pseudogene 25; ribosomal protein S6; ribosomal protein S6 pseudogene 1                                                   | Homo sapiens |
| 440086 | ribosomal protein S6 pseudogene 25; ribosomal protein S6; ribosomal protein S6 pseudogene 1                                                   | Homo sapiens |
| 55183  | RAP1 interacting factor homolog (yeast)                                                                                                       | Homo sapiens |
| 547    | kinesin family member 1A                                                                                                                      | Homo sapiens |
| 51074  | APAF1 interacting protein; similar to APAF1 interacting protein                                                                               | Homo sapiens |



|           |                                                                                                                                                                                                                                                                                                                                                                                                                                                                                |              |
|-----------|--------------------------------------------------------------------------------------------------------------------------------------------------------------------------------------------------------------------------------------------------------------------------------------------------------------------------------------------------------------------------------------------------------------------------------------------------------------------------------|--------------|
| 728823    | ribosomal protein S26 pseudogene 38; ribosomal protein S26 pseudogene 39; ribosomal protein S26 pseudogene 35; ribosomal protein S26 pseudogene 31; ribosomal protein S26 pseudogene 20; ribosomal protein S26 pseudogene 54; ribosomal protein S26 pseudogene 2; ribosomal protein S26 pseudogene 53; ribosomal protein S26 pseudogene 25; ribosomal protein S26 pseudogene 50; ribosomal protein S26 pseudogene 6; ribosomal protein S26 pseudogene 8; ribosomal protein S26 | Homo sapiens |
| 644191    | ribosomal protein S26 pseudogene 38; ribosomal protein S26 pseudogene 39; ribosomal protein S26 pseudogene 35; ribosomal protein S26 pseudogene 31; ribosomal protein S26 pseudogene 20; ribosomal protein S26 pseudogene 54; ribosomal protein S26 pseudogene 2; ribosomal protein S26 pseudogene 53; ribosomal protein S26 pseudogene 25; ribosomal protein S26 pseudogene 50; ribosomal protein S26 pseudogene 6; ribosomal protein S26 pseudogene 8; ribosomal protein S26 | Homo sapiens |
| 10087     | collagen, type IV, alpha 3 (Goodpasture antigen) binding protein                                                                                                                                                                                                                                                                                                                                                                                                               | Homo sapiens |
| 11143     | MYST histone acetyltransferase 2; similar to MYST histone acetyltransferase 2                                                                                                                                                                                                                                                                                                                                                                                                  | Homo sapiens |
| 648927    | MYST histone acetyltransferase 2; similar to MYST histone acetyltransferase 2                                                                                                                                                                                                                                                                                                                                                                                                  | Homo sapiens |
| 23098     | sterile alpha and TIR motif containing 1                                                                                                                                                                                                                                                                                                                                                                                                                                       | Homo sapiens |
| 90459     | exoribonuclease 1                                                                                                                                                                                                                                                                                                                                                                                                                                                              | Homo sapiens |
| 10200     | M-phase phosphoprotein 6                                                                                                                                                                                                                                                                                                                                                                                                                                                       | Homo sapiens |
| 115106    | HAUS augmin-like complex, subunit 1                                                                                                                                                                                                                                                                                                                                                                                                                                            | Homo sapiens |
| 646780    | phosphorylase kinase, alpha 1 pseudogene 1; phosphorylase kinase, alpha 1 (muscle)                                                                                                                                                                                                                                                                                                                                                                                             | Homo sapiens |
| 8914      | timeless homolog (Drosophila)                                                                                                                                                                                                                                                                                                                                                                                                                                                  | Homo sapiens |
| 6311      | ataxin 2                                                                                                                                                                                                                                                                                                                                                                                                                                                                       | Homo sapiens |
| 5073      | poly(A)-specific ribonuclease (deadenylation nuclease)                                                                                                                                                                                                                                                                                                                                                                                                                         | Homo sapiens |
| 23310     | non-SMC condensin II complex, subunit D3                                                                                                                                                                                                                                                                                                                                                                                                                                       | Homo sapiens |
| 55602     | CDKN2A interacting protein                                                                                                                                                                                                                                                                                                                                                                                                                                                     | Homo sapiens |
| 285643    | kinesin family member 4B; kinesin family member 4A                                                                                                                                                                                                                                                                                                                                                                                                                             | Homo sapiens |
| 24147     | four jointed box 1 (Drosophila)                                                                                                                                                                                                                                                                                                                                                                                                                                                | Homo sapiens |
| 128240    | apolipoprotein A-I binding protein                                                                                                                                                                                                                                                                                                                                                                                                                                             | Homo sapiens |
| 652147    | similar to U5 snRNP-specific protein, 200 kDa; small nuclear ribonucleoprotein 200kDa (U5)                                                                                                                                                                                                                                                                                                                                                                                     | Homo sapiens |
| 8925      | hect (homologous to the E6-AP (UBE3A) carboxyl terminus) domain and RCC1 (CHC1)-like domain (RLD) 1                                                                                                                                                                                                                                                                                                                                                                            | Homo sapiens |
| 23192     | ATG4 autophagy related 4 homolog B (S. cerevisiae)                                                                                                                                                                                                                                                                                                                                                                                                                             | Homo sapiens |
| 5074      | PRKC, apoptosis, WTL, regulator                                                                                                                                                                                                                                                                                                                                                                                                                                                | Homo sapiens |
| 8672      | eukaryotic translation initiation factor 4 gamma, 3                                                                                                                                                                                                                                                                                                                                                                                                                            | Homo sapiens |
| 8646      | chordin                                                                                                                                                                                                                                                                                                                                                                                                                                                                        | Homo sapiens |
| 23259     | DDHD domain containing 2                                                                                                                                                                                                                                                                                                                                                                                                                                                       | Homo sapiens |
| 8940      | topoisomerase (DNA) III beta                                                                                                                                                                                                                                                                                                                                                                                                                                                   | Homo sapiens |
| 84930     | microtubule associated serine/threonine kinase-like                                                                                                                                                                                                                                                                                                                                                                                                                            | Homo sapiens |
| 55671     | SMEK homolog 1, suppressor of mekl (Dictyostelium)                                                                                                                                                                                                                                                                                                                                                                                                                             | Homo sapiens |
| 10605     | poly(A) binding protein interacting protein 1; similar to poly(A) binding protein interacting protein 1                                                                                                                                                                                                                                                                                                                                                                        | Homo sapiens |
| 645139    | poly(A) binding protein interacting protein 1; similar to poly(A) binding protein interacting protein 1                                                                                                                                                                                                                                                                                                                                                                        | Homo sapiens |
| 64084     | calsyntenin 2                                                                                                                                                                                                                                                                                                                                                                                                                                                                  | Homo sapiens |
| 54930     | HAUS augmin-like complex, subunit 4                                                                                                                                                                                                                                                                                                                                                                                                                                            | Homo sapiens |
| 60625     | DEAH (Asp-Glu-Ala-His) box polypeptide 35                                                                                                                                                                                                                                                                                                                                                                                                                                      | Homo sapiens |
| 79625     | chromosome 4 open reading frame 31                                                                                                                                                                                                                                                                                                                                                                                                                                             | Homo sapiens |
| 54797     | mediator complex subunit 18                                                                                                                                                                                                                                                                                                                                                                                                                                                    | Homo sapiens |
| 25938     | HEAT repeat containing 5A                                                                                                                                                                                                                                                                                                                                                                                                                                                      | Homo sapiens |
| 100133690 | hypothetical protein LOC100133690; activated leukocyte cell adhesion molecule                                                                                                                                                                                                                                                                                                                                                                                                  | Homo sapiens |
| 51592     | tripartite motif-containing 33                                                                                                                                                                                                                                                                                                                                                                                                                                                 | Homo sapiens |
| 28964     | G protein-coupled receptor kinase interacting ArfGAP 1                                                                                                                                                                                                                                                                                                                                                                                                                         | Homo sapiens |
| 9953      | heparan sulfate (glucosamine) 3-O-sulfotransferase 3B1                                                                                                                                                                                                                                                                                                                                                                                                                         | Homo sapiens |
| 1964      | eukaryotic translation initiation factor 1A, X-linked                                                                                                                                                                                                                                                                                                                                                                                                                          | Homo sapiens |
| 10565     | ADP-ribosylation factor guanine nucleotide-exchange factor 1(brefeldin A-inhibited)                                                                                                                                                                                                                                                                                                                                                                                            | Homo sapiens |
| 10687     | paraneoplastic antigen MA2                                                                                                                                                                                                                                                                                                                                                                                                                                                     | Homo sapiens |
| 112950    | mediator complex subunit 8                                                                                                                                                                                                                                                                                                                                                                                                                                                     | Homo sapiens |
| 85451     | unkempt homolog (Drosophila)                                                                                                                                                                                                                                                                                                                                                                                                                                                   | Homo sapiens |
| 79801     | SHC SH2-domain binding protein 1                                                                                                                                                                                                                                                                                                                                                                                                                                               | Homo sapiens |
| 22985     | apoptotic chromatin condensation inducer 1                                                                                                                                                                                                                                                                                                                                                                                                                                     | Homo sapiens |
| 55175     | kelch-like 11 (Drosophila)                                                                                                                                                                                                                                                                                                                                                                                                                                                     | Homo sapiens |
| 115098    | coiled-coil domain containing 124                                                                                                                                                                                                                                                                                                                                                                                                                                              | Homo sapiens |
| 55157     | aspartyl-tRNA synthetase 2, mitochondrial                                                                                                                                                                                                                                                                                                                                                                                                                                      | Homo sapiens |
| 54870     | glutamine-rich 1                                                                                                                                                                                                                                                                                                                                                                                                                                                               | Homo sapiens |
| 3661      | interferon regulatory factor 3                                                                                                                                                                                                                                                                                                                                                                                                                                                 | Homo sapiens |
| 64419     | myotubularin related protein 14                                                                                                                                                                                                                                                                                                                                                                                                                                                | Homo sapiens |
| 2976      | general transcription factor IIIc, polypeptide 2, beta 110kDa                                                                                                                                                                                                                                                                                                                                                                                                                  | Homo sapiens |
| 9100      | ubiquitin specific peptidase 10                                                                                                                                                                                                                                                                                                                                                                                                                                                | Homo sapiens |
| 9931      | helicase with zinc finger                                                                                                                                                                                                                                                                                                                                                                                                                                                      | Homo sapiens |
| 9394      | heparan sulfate 6-O-sulfotransferase 1                                                                                                                                                                                                                                                                                                                                                                                                                                         | Homo sapiens |
| 1388      | activating transcription factor 6 beta                                                                                                                                                                                                                                                                                                                                                                                                                                         | Homo sapiens |
| 7072      | TIA1 cytotoxic granule-associated RNA binding protein                                                                                                                                                                                                                                                                                                                                                                                                                          | Homo sapiens |







|           |                                                                                                                                                                                                                                                                                                                                                                                                                                                                                                                                                                                                                                                                                                                                                                                                                                                                                                                 |              |
|-----------|-----------------------------------------------------------------------------------------------------------------------------------------------------------------------------------------------------------------------------------------------------------------------------------------------------------------------------------------------------------------------------------------------------------------------------------------------------------------------------------------------------------------------------------------------------------------------------------------------------------------------------------------------------------------------------------------------------------------------------------------------------------------------------------------------------------------------------------------------------------------------------------------------------------------|--------------|
| 728693    | ribosomal protein L21 pseudogene 134; ribosomal protein L21 pseudogene 80; ribosomal protein L21 pseudogene 20; ribosomal protein L21 pseudogene 46; ribosomal protein L21 pseudogene 45; ribosomal protein L21 pseudogene 131; ribosomal protein L21 pseudogene 16; ribosomal protein L21 pseudogene 53; ribosomal protein L21 pseudogene 120; ribosomal protein L21 pseudogene 37; ribosomal protein L21 pseudogene 93; ribosomal protein L21 pseudogene 39; ribosomal protein L21 pseudogene 29; ribosomal protein L21 pseudogene 28; ribosomal protein L21 pseudogene 14; ribosomal protein L21 pseudogene 98; ribosomal protein L21 pseudogene 105; ribosomal protein L21 pseudogene 87; ribosomal protein L21 pseudogene 128; ribosomal protein L21 pseudogene 69; ribosomal protein L21 pseudogene 97; ribosomal protein L21; ribosomal protein L21 pseudogene 119; ribosomal protein L21 pseudogene 125 | Homo sapiens |
| 100129141 | ribosomal protein L21 pseudogene 134; ribosomal protein L21 pseudogene 80; ribosomal protein L21 pseudogene 20; ribosomal protein L21 pseudogene 46; ribosomal protein L21 pseudogene 45; ribosomal protein L21 pseudogene 131; ribosomal protein L21 pseudogene 16; ribosomal protein L21 pseudogene 53; ribosomal protein L21 pseudogene 120; ribosomal protein L21 pseudogene 37; ribosomal protein L21 pseudogene 93; ribosomal protein L21 pseudogene 39; ribosomal protein L21 pseudogene 29; ribosomal protein L21 pseudogene 28; ribosomal protein L21 pseudogene 14; ribosomal protein L21 pseudogene 98; ribosomal protein L21 pseudogene 105; ribosomal protein L21 pseudogene 87; ribosomal protein L21 pseudogene 128; ribosomal protein L21 pseudogene 69; ribosomal protein L21 pseudogene 97; ribosomal protein L21; ribosomal protein L21 pseudogene 119; ribosomal protein L21 pseudogene 125 | Homo sapiens |
| 645174    | ribosomal protein L21 pseudogene 134; ribosomal protein L21 pseudogene 80; ribosomal protein L21 pseudogene 20; ribosomal protein L21 pseudogene 46; ribosomal protein L21 pseudogene 45; ribosomal protein L21 pseudogene 131; ribosomal protein L21 pseudogene 16; ribosomal protein L21 pseudogene 53; ribosomal protein L21 pseudogene 120; ribosomal protein L21 pseudogene 37; ribosomal protein L21 pseudogene 93; ribosomal protein L21 pseudogene 39; ribosomal protein L21 pseudogene 29; ribosomal protein L21 pseudogene 28; ribosomal protein L21 pseudogene 14; ribosomal protein L21 pseudogene 98; ribosomal protein L21 pseudogene 105; ribosomal protein L21 pseudogene 87; ribosomal protein L21 pseudogene 128; ribosomal protein L21 pseudogene 69; ribosomal protein L21 pseudogene 97; ribosomal protein L21; ribosomal protein L21 pseudogene 119; ribosomal protein L21 pseudogene 125 | Homo sapiens |
| 440487    | ribosomal protein L21 pseudogene 134; ribosomal protein L21 pseudogene 80; ribosomal protein L21 pseudogene 20; ribosomal protein L21 pseudogene 46; ribosomal protein L21 pseudogene 45; ribosomal protein L21 pseudogene 131; ribosomal protein L21 pseudogene 16; ribosomal protein L21 pseudogene 53; ribosomal protein L21 pseudogene 120; ribosomal protein L21 pseudogene 37; ribosomal protein L21 pseudogene 93; ribosomal protein L21 pseudogene 39; ribosomal protein L21 pseudogene 29; ribosomal protein L21 pseudogene 28; ribosomal protein L21 pseudogene 14; ribosomal protein L21 pseudogene 98; ribosomal protein L21 pseudogene 105; ribosomal protein L21 pseudogene 87; ribosomal protein L21 pseudogene 128; ribosomal protein L21 pseudogene 69; ribosomal protein L21 pseudogene 97; ribosomal protein L21; ribosomal protein L21 pseudogene 119; ribosomal protein L21 pseudogene 125 | Homo sapiens |
| 642738    | ribosomal protein L21 pseudogene 134; ribosomal protein L21 pseudogene 80; ribosomal protein L21 pseudogene 20; ribosomal protein L21 pseudogene 46; ribosomal protein L21 pseudogene 45; ribosomal protein L21 pseudogene 131; ribosomal protein L21 pseudogene 16; ribosomal protein L21 pseudogene 53; ribosomal protein L21 pseudogene 120; ribosomal protein L21 pseudogene 37; ribosomal protein L21 pseudogene 93; ribosomal protein L21 pseudogene 39; ribosomal protein L21 pseudogene 29; ribosomal protein L21 pseudogene 28; ribosomal protein L21 pseudogene 14; ribosomal protein L21 pseudogene 98; ribosomal protein L21 pseudogene 105; ribosomal protein L21 pseudogene 87; ribosomal protein L21 pseudogene 128; ribosomal protein L21 pseudogene 69; ribosomal protein L21 pseudogene 97; ribosomal protein L21; ribosomal protein L21 pseudogene 119; ribosomal protein L21 pseudogene 125 | Homo sapiens |
| 113251    | La ribonucleoprotein domain family, member 4                                                                                                                                                                                                                                                                                                                                                                                                                                                                                                                                                                                                                                                                                                                                                                                                                                                                    | Homo sapiens |
| 2824      | glycoprotein M6B                                                                                                                                                                                                                                                                                                                                                                                                                                                                                                                                                                                                                                                                                                                                                                                                                                                                                                | Homo sapiens |
| 6830      | suppressor of Ty 6 homolog (S. cerevisiae)                                                                                                                                                                                                                                                                                                                                                                                                                                                                                                                                                                                                                                                                                                                                                                                                                                                                      | Homo sapiens |
| 26086     | G-protein signaling modulator 1 (AGS3-like, C. elegans)                                                                                                                                                                                                                                                                                                                                                                                                                                                                                                                                                                                                                                                                                                                                                                                                                                                         | Homo sapiens |
| 10600     | ubiquitin specific peptidase 16                                                                                                                                                                                                                                                                                                                                                                                                                                                                                                                                                                                                                                                                                                                                                                                                                                                                                 | Homo sapiens |
| 2177      | Fanconi anemia, complementation group D2                                                                                                                                                                                                                                                                                                                                                                                                                                                                                                                                                                                                                                                                                                                                                                                                                                                                        | Homo sapiens |
| 26145     | interferon regulatory factor 2 binding protein 1                                                                                                                                                                                                                                                                                                                                                                                                                                                                                                                                                                                                                                                                                                                                                                                                                                                                | Homo sapiens |
| 23283     | cleavage stimulation factor, 3' pre-RNA, subunit 2, 64kDa, tau variant                                                                                                                                                                                                                                                                                                                                                                                                                                                                                                                                                                                                                                                                                                                                                                                                                                          | Homo sapiens |
| 55707     | NECAP endocytosis associated 2                                                                                                                                                                                                                                                                                                                                                                                                                                                                                                                                                                                                                                                                                                                                                                                                                                                                                  | Homo sapiens |
| 7175      | translocated promoter region (to activated MET oncogene)                                                                                                                                                                                                                                                                                                                                                                                                                                                                                                                                                                                                                                                                                                                                                                                                                                                        | Homo sapiens |
| 64978     | mitochondrial ribosomal protein L38                                                                                                                                                                                                                                                                                                                                                                                                                                                                                                                                                                                                                                                                                                                                                                                                                                                                             | Homo sapiens |
| 692224    | FBXO22 opposite strand (non-protein coding); F-box protein 22                                                                                                                                                                                                                                                                                                                                                                                                                                                                                                                                                                                                                                                                                                                                                                                                                                                   | Homo sapiens |
| 11218     | DEAD (Asp-Glu-Ala-Asp) box polypeptide 20                                                                                                                                                                                                                                                                                                                                                                                                                                                                                                                                                                                                                                                                                                                                                                                                                                                                       | Homo sapiens |
| 649299    | ribosomal protein L36a pseudogene 51; ribosomal protein L36a pseudogene 37; ribosomal protein L36a pseudogene 49; heterogeneous nuclear ribonucleoprotein H2 (H <sup>2</sup> ); ribosomal protein L36a                                                                                                                                                                                                                                                                                                                                                                                                                                                                                                                                                                                                                                                                                                          | Homo sapiens |
| 729362    | ribosomal protein L36a pseudogene 51; ribosomal protein L36a pseudogene 37; ribosomal protein L36a pseudogene 49; heterogeneous nuclear ribonucleoprotein H2 (H <sup>2</sup> ); ribosomal protein L36a                                                                                                                                                                                                                                                                                                                                                                                                                                                                                                                                                                                                                                                                                                          | Homo sapiens |



|        |                                                                                                                                                                                                        |              |
|--------|--------------------------------------------------------------------------------------------------------------------------------------------------------------------------------------------------------|--------------|
| 284230 | ribosomal protein L36a pseudogene 51; ribosomal protein L36a pseudogene 37; ribosomal protein L36a pseudogene 49; heterogeneous nuclear ribonucleoprotein H2 (H <sup>1</sup> ); ribosomal protein L36a | Homo sapiens |
| 6173   | ribosomal protein L36a pseudogene 51; ribosomal protein L36a pseudogene 37; ribosomal protein L36a pseudogene 49; heterogeneous nuclear ribonucleoprotein H2 (H <sup>1</sup> ); ribosomal protein L36a | Homo sapiens |
| 23512  | suppressor of zeste 12 homolog (Drosophila)                                                                                                                                                            | Homo sapiens |
| 22992  | lysine (K)-specific demethylase 2A                                                                                                                                                                     | Homo sapiens |
| 387597 | immunoglobulin-like domain containing receptor 2                                                                                                                                                       | Homo sapiens |
| 55034  | molybdenum cofactor sulfurase                                                                                                                                                                          | Homo sapiens |
| 55787  | chromosome X open reading frame 15                                                                                                                                                                     | Homo sapiens |
| 388552 | biogenesis of lysosomal organelles complex-1, subunit 3                                                                                                                                                | Homo sapiens |
| 25904  | CCR4-NOT transcription complex, subunit 10                                                                                                                                                             | Homo sapiens |
| 9329   | general transcription factor IIIC, polypeptide 4, 90kDa                                                                                                                                                | Homo sapiens |
| 9736   | ubiquitin specific peptidase 34                                                                                                                                                                        | Homo sapiens |
| 2786   | guanine nucleotide binding protein (G protein), gamma 4                                                                                                                                                | Homo sapiens |
| 9644   | SH3 and PX domains 2A                                                                                                                                                                                  | Homo sapiens |
| 10898  | cleavage and polyadenylation specific factor 4, 30kDa                                                                                                                                                  | Homo sapiens |
| 8816   | WD repeat domain 22                                                                                                                                                                                    | Homo sapiens |
| 9730   | Vpr (HIV-1) binding protein                                                                                                                                                                            | Homo sapiens |
| 606551 | ubiquitin-conjugating enzyme E2M (UBC12 homolog, yeast); ubiquitin-conjugating enzyme E2M pseudogene 1                                                                                                 | Homo sapiens |
| 27097  | TAF5-like RNA polymerase II, p300/CBP-associated factor (PCAF)-associated factor, 65kDa                                                                                                                | Homo sapiens |
| 51668  | heat shock protein family B (small), member 11                                                                                                                                                         | Homo sapiens |
| 391370 | ribosomal protein S12; ribosomal protein S12 pseudogene 4; ribosomal protein S12 pseudogene 11; ribosomal protein S12 pseudogene 9                                                                     | Homo sapiens |
| 727997 | ribosomal protein S12; ribosomal protein S12 pseudogene 4; ribosomal protein S12 pseudogene 11; ribosomal protein S12 pseudogene 9                                                                     | Homo sapiens |
| 442270 | ribosomal protein S12; ribosomal protein S12 pseudogene 4; ribosomal protein S12 pseudogene 11; ribosomal protein S12 pseudogene 9                                                                     | Homo sapiens |
| 11169  | WD repeat and HMG-box DNA binding protein 1                                                                                                                                                            | Homo sapiens |
| 642395 | paraspeckle component 1; paraspeckle protein 1 pseudogene                                                                                                                                              | Homo sapiens |
| 4848   | CCR4-NOT transcription complex, subunit 2                                                                                                                                                              | Homo sapiens |
| 57553  | microtubule associated monooxygenase, calponin and LIM domain containing 3                                                                                                                             | Homo sapiens |
| 649    | bone morphogenetic protein 1                                                                                                                                                                           | Homo sapiens |
| 221937 | forkhead box K1                                                                                                                                                                                        | Homo sapiens |
| 55958  | kelch-like 9 (Drosophila)                                                                                                                                                                              | Homo sapiens |
| 1363   | carboxypeptidase E                                                                                                                                                                                     | Homo sapiens |
| 26577  | procollagen C-endopeptidase enhancer 2                                                                                                                                                                 | Homo sapiens |
| 8318   | CDC45 cell division cycle 45-like (S. cerevisiae)                                                                                                                                                      | Homo sapiens |
| 23248  | regulation of nuclear pre-mRNA domain containing 2                                                                                                                                                     | Homo sapiens |
| 705    | bystin-like                                                                                                                                                                                            | Homo sapiens |
| 8722   | cathepsin F                                                                                                                                                                                            | Homo sapiens |
| 23543  | RNA binding motif protein 9                                                                                                                                                                            | Homo sapiens |
| 54148  | mitochondrial ribosomal protein L39                                                                                                                                                                    | Homo sapiens |
| 645175 | mediator of cell motility 1; similar to mediator of cell motility 1                                                                                                                                    | Homo sapiens |
| 23299  | bicaudal D homolog 2 (Drosophila)                                                                                                                                                                      | Homo sapiens |
| 54970  | tetratricopeptide repeat domain 12                                                                                                                                                                     | Homo sapiens |
| 58496  | lymphocyte antigen 6 complex, locus G5B; casein kinase 2, beta polypeptide                                                                                                                             | Homo sapiens |
| 25819  | CCR4 carbon catabolite repression 4-like (S. cerevisiae)                                                                                                                                               | Homo sapiens |
| 55086  | chromosome X open reading frame 57                                                                                                                                                                     | Homo sapiens |
| 9470   | eukaryotic translation initiation factor 4E family member 2                                                                                                                                            | Homo sapiens |
| 9825   | spermatogenesis associated 2                                                                                                                                                                           | Homo sapiens |
| 133584 | EGF-like, fibronectin type III and laminin G domains                                                                                                                                                   | Homo sapiens |
| 64793  | coiled-coil domain containing 21                                                                                                                                                                       | Homo sapiens |
| 5970   | v-rel reticuloendotheliosis viral oncogene homolog A (avian)                                                                                                                                           | Homo sapiens |
| 374378 | UDP-N-acetyl-alpha-D-galactosamine:polypeptide N-acetylgalactosaminyltransferase-like 4                                                                                                                | Homo sapiens |
| 9112   | metastasis associated 1                                                                                                                                                                                | Homo sapiens |
| 115548 | FCH domain only 2                                                                                                                                                                                      | Homo sapiens |
| 23112  | trinucleotide repeat containing 6B                                                                                                                                                                     | Homo sapiens |
| 83443  | splicing factor 3b, subunit 5, 10kDa                                                                                                                                                                   | Homo sapiens |
| 6457   | SH3-domain GRB2-like 3                                                                                                                                                                                 | Homo sapiens |
| 1111   | CHK1 checkpoint homolog (S. pombe)                                                                                                                                                                     | Homo sapiens |
| 9816   | URB2 ribosome biogenesis 2 homolog (S. cerevisiae)                                                                                                                                                     | Homo sapiens |
| 1063   | centromere protein F, 350/400ka (mitosin)                                                                                                                                                              | Homo sapiens |
| 29088  | mitochondrial ribosomal protein L15                                                                                                                                                                    | Homo sapiens |
| 55132  | La ribonucleoprotein domain family, member 1B                                                                                                                                                          | Homo sapiens |
| 63894  | chromosome 14 open reading frame 133                                                                                                                                                                   | Homo sapiens |
| 59286  | ubiquitin-like 5                                                                                                                                                                                       | Homo sapiens |
| 92105  | integrator complex subunit 4                                                                                                                                                                           | Homo sapiens |
| 23351  | KIAA0323                                                                                                                                                                                               | Homo sapiens |
| 55291  | SAPS domain family, member 3                                                                                                                                                                           | Homo sapiens |
| 55154  | misato homolog 1 (Drosophila)                                                                                                                                                                          | Homo sapiens |
| 79724  | zinc finger protein 768                                                                                                                                                                                | Homo sapiens |
| 23186  | REST corepressor 1                                                                                                                                                                                     | Homo sapiens |
| 10209  | similar to eukaryotic translation initiation factor 1; eukaryotic translation initiation factor 1                                                                                                      | Homo sapiens |

|           |                                                                                                                                                                                                                                                                      |              |
|-----------|----------------------------------------------------------------------------------------------------------------------------------------------------------------------------------------------------------------------------------------------------------------------|--------------|
| 730144    | similar to eukaryotic translation initiation factor 1; eukaryotic translation initiation factor 1                                                                                                                                                                    | Homo sapiens |
| 60561     | RAD50 interactor 1                                                                                                                                                                                                                                                   | Homo sapiens |
| 79971     | G protein-coupled receptor 177                                                                                                                                                                                                                                       | Homo sapiens |
| 9700      | extra spindle pole bodies homolog 1 ( <i>S. cerevisiae</i> )                                                                                                                                                                                                         | Homo sapiens |
| 6238      | ribosome binding protein 1 homolog 180kDa (dog)                                                                                                                                                                                                                      | Homo sapiens |
| 387680    | family with sequence similarity 21, member B; family with sequence similarity 21, member A                                                                                                                                                                           | Homo sapiens |
| 55747     | family with sequence similarity 21, member B; family with sequence similarity 21, member A                                                                                                                                                                           | Homo sapiens |
| 1852      | dual specificity phosphatase 9                                                                                                                                                                                                                                       | Homo sapiens |
| 23173     | methionyl aminopeptidase 1                                                                                                                                                                                                                                           | Homo sapiens |
| 64426     | suppressor of defective silencing 3 homolog ( <i>S. cerevisiae</i> )                                                                                                                                                                                                 | Homo sapiens |
| 23132     | RAD54-like 2 ( <i>S. cerevisiae</i> )                                                                                                                                                                                                                                | Homo sapiens |
| 23511     | nucleoporin 188kDa                                                                                                                                                                                                                                                   | Homo sapiens |
| 727758    | similar to Rho-associated, coiled-coil containing protein kinase 1; Rho-associated, coiled-coil containing protein kinase 1                                                                                                                                          | Homo sapiens |
| 1744      | dihydrolipoamide S-succinyltransferase (E2 component of 2-oxo-glutarate complex); dihydrolipoamide S-succinyltransferase pseudogene (E2 component of 2-oxo-glutarate complex)                                                                                        | Homo sapiens |
| 100129808 | ribosomal protein L24; ribosomal protein L24 pseudogene 6                                                                                                                                                                                                            | Homo sapiens |
| 2197      | Finkel-Biskis-Reilly murine sarcoma virus (FBR-MuSV) ubiquitously expressed                                                                                                                                                                                          | Homo sapiens |
| 388556    | ribosomal protein S9; ribosomal protein S9 pseudogene 4                                                                                                                                                                                                              | Homo sapiens |
| 100131735 | similar to RNA binding motif protein, X-linked; similar to hCG2011544; RNA binding motif protein, X-linked                                                                                                                                                           | Homo sapiens |
| 100129585 | similar to RNA binding motif protein, X-linked; similar to hCG2011544; RNA binding motif protein, X-linked                                                                                                                                                           | Homo sapiens |
| 388275    | heterogeneous nuclear ribonucleoprotein A1-like 3; similar to heterogeneous nuclear ribonucleoprotein A1; heterogeneous nuclear ribonucleoprotein A1 pseudogene 2; heterogeneous nuclear ribonucleoprotein A1; heterogeneous nuclear ribonucleoprotein A1 pseudogene | Homo sapiens |
| 100131609 | heterogeneous nuclear ribonucleoprotein A1-like 3; similar to heterogeneous nuclear ribonucleoprotein A1; heterogeneous nuclear ribonucleoprotein A1 pseudogene 2; heterogeneous nuclear ribonucleoprotein A1; heterogeneous nuclear ribonucleoprotein A1 pseudogene | Homo sapiens |
| 664709    | heterogeneous nuclear ribonucleoprotein A1-like 3; similar to heterogeneous nuclear ribonucleoprotein A1; heterogeneous nuclear ribonucleoprotein A1 pseudogene 2; heterogeneous nuclear ribonucleoprotein A1; heterogeneous nuclear ribonucleoprotein A1 pseudogene | Homo sapiens |
| 645691    | heterogeneous nuclear ribonucleoprotein A1-like 3; similar to heterogeneous nuclear ribonucleoprotein A1; heterogeneous nuclear ribonucleoprotein A1 pseudogene 2; heterogeneous nuclear ribonucleoprotein A1; heterogeneous nuclear ribonucleoprotein A1 pseudogene | Homo sapiens |
| 728643    | heterogeneous nuclear ribonucleoprotein A1-like 3; similar to heterogeneous nuclear ribonucleoprotein A1; heterogeneous nuclear ribonucleoprotein A1 pseudogene 2; heterogeneous nuclear ribonucleoprotein A1; heterogeneous nuclear ribonucleoprotein A1 pseudogene | Homo sapiens |
| 644037    | heterogeneous nuclear ribonucleoprotein A1-like 3; similar to heterogeneous nuclear ribonucleoprotein A1; heterogeneous nuclear ribonucleoprotein A1 pseudogene 2; heterogeneous nuclear ribonucleoprotein A1; heterogeneous nuclear ribonucleoprotein A1 pseudogene | Homo sapiens |
| 51322     | WW domain containing adaptor with coiled-coil                                                                                                                                                                                                                        | Homo sapiens |
| 727761    | deoxythymidylate kinase (thymidylate kinase); similar to Deoxythymidylate kinase (thymidylate kinase)                                                                                                                                                                | Homo sapiens |
| 4440      | musashi homolog 1 ( <i>Drosophila</i> )                                                                                                                                                                                                                              | Homo sapiens |
| 170622    | COMM domain containing 6                                                                                                                                                                                                                                             | Homo sapiens |
| 114885    | oxysterol binding protein-like 11                                                                                                                                                                                                                                    | Homo sapiens |
| 96764     | trimethylguanosine synthase homolog ( <i>S. cerevisiae</i> )                                                                                                                                                                                                         | Homo sapiens |
| 4722      | NADH dehydrogenase (ubiquinone) Fe-S protein 3, 30kDa (NADH-coenzyme Q reductase)                                                                                                                                                                                    | Homo sapiens |
| 5436      | polymerase (RNA) II (DNA directed) polypeptide G                                                                                                                                                                                                                     | Homo sapiens |
| 10902     | bromodomain containing 8                                                                                                                                                                                                                                             | Homo sapiens |
| 100131693 | eukaryotic translation initiation factor 4E; similar to hCG1777996; similar to eukaryotic translation initiation factor 4E                                                                                                                                           | Homo sapiens |
| 100131565 | eukaryotic translation initiation factor 4E; similar to hCG1777996; similar to eukaryotic translation initiation factor 4E                                                                                                                                           | Homo sapiens |
| 10534     | Sjogren syndrome/scleroderma autoantigen 1                                                                                                                                                                                                                           | Homo sapiens |
| 55699     | isoleucyl-tRNA synthetase 2, mitochondrial                                                                                                                                                                                                                           | Homo sapiens |
| 54497     | HEAT repeat containing 5B                                                                                                                                                                                                                                            | Homo sapiens |
| 650638    | similar to signal recognition particle 54kDa; signal recognition particle 54kDa                                                                                                                                                                                      | Homo sapiens |
| 6419      | SET domain and mariner transposase fusion gene                                                                                                                                                                                                                       | Homo sapiens |
| 653879    | similar to Complement C3 precursor; complement component 3; hypothetical protein LOC100133511                                                                                                                                                                        | Homo sapiens |
| 100133511 | similar to Complement C3 precursor; complement component 3; hypothetical protein LOC100133511                                                                                                                                                                        | Homo sapiens |
| 9739      | SET domain containing 1A                                                                                                                                                                                                                                             | Homo sapiens |
| 151579    | basic leucine zipper and W2 domains 1 pseudogene 1; basic leucine zipper and W2 domains 1 like 1; basic leucine zipper and W2 domains 1                                                                                                                              | Homo sapiens |

|           |                                                                                                                                  |              |
|-----------|----------------------------------------------------------------------------------------------------------------------------------|--------------|
| 391592    | basic leucine zipper and W2 domains 1 pseudogene 1; basic leucine zipper and W2 domains 1 like 1;                                | Homo sapiens |
| 57572     | basic leucine zipper and W2 domains 1                                                                                            | Homo sapiens |
| 28991     | dedicator of cytokinesis 6                                                                                                       | Homo sapiens |
| 25847     | COMM domain containing 5                                                                                                         | Homo sapiens |
| 54480     | anaphase promoting complex subunit 13                                                                                            | Homo sapiens |
| 653450    | chondroitin sulfate glucuronyltransferase                                                                                        | Homo sapiens |
| 253725    | family with sequence similarity 21, member D; family with sequence similarity 21, member C                                       | Homo sapiens |
| 9910      | RAB GTPase activating protein 1-like                                                                                             | Homo sapiens |
| 1837      | dystrobrevin, alpha                                                                                                              | Homo sapiens |
| 23215     | BAT2 domain containing 1                                                                                                         | Homo sapiens |
| 22856     | chondroitin sulfate synthase 1                                                                                                   | Homo sapiens |
| 55319     | chromosome 4 open reading frame 43                                                                                               | Homo sapiens |
| 23326     | ubiquitin specific peptidase 22                                                                                                  | Homo sapiens |
| 84259     | DCN1, defective in cullin neddylation 1, domain containing 5 ( <i>S. cerevisiae</i> )                                            | Homo sapiens |
| 2131      | exostoses (multiple) 1                                                                                                           | Homo sapiens |
| 64093     | SPARC related modular calcium binding 1                                                                                          | Homo sapiens |
| 389901    | X-ray repair complementing defective repair in Chinese hamster cells 6; similar to ATP-dependent DNA helicase II, 70 kDa subunit | Homo sapiens |
| 27344     | proprotein convertase subtilisin/kexin type 1 inhibitor                                                                          | Homo sapiens |
| 50813     | COP9 constitutive photomorphogenic homolog subunit 7A ( <i>Arabidopsis</i> )                                                     | Homo sapiens |
| 65109     | UPF3 regulator of nonsense transcripts homolog B (yeast)                                                                         | Homo sapiens |
| 55174     | integrator complex subunit 10                                                                                                    | Homo sapiens |
| 647030    | eukaryotic translation elongation factor 1 beta 2; eukaryotic translation elongation factor 1 beta 2-like                        | Homo sapiens |
| 27433     | torsin family 2, member A                                                                                                        | Homo sapiens |
| 80328     | UL16 binding protein 2                                                                                                           | Homo sapiens |
| 90957     | DEAH (Asp-Glu-Ala-Asp/His) box polypeptide 57                                                                                    | Homo sapiens |
| 8434      | reversion-inducing-cysteine-rich protein with kazal motifs                                                                       | Homo sapiens |
| 723961    | insulin-like growth factor 2 (somatomedin A); insulin; INS-IGF2 readthrough transcript                                           | Homo sapiens |
| 9474      | ATG5 autophagy related 5 homolog ( <i>S. cerevisiae</i> )                                                                        | Homo sapiens |
| 9444      | quaking homolog, KH domain RNA binding (mouse)                                                                                   | Homo sapiens |
| 79033     | exoribonuclease 3                                                                                                                | Homo sapiens |
| 740       | mitochondrial ribosomal protein L49                                                                                              | Homo sapiens |
| 51299     | neuritin 1                                                                                                                       | Homo sapiens |
| 51366     | similar to E3 ubiquitin protein ligase, HECT domain containing, 1; ubiquitin protein ligase E3 component n-recogin 5             | Homo sapiens |
| 730429    | similar to E3 ubiquitin protein ligase, HECT domain containing, 1; ubiquitin protein ligase E3 component n-recogin 5             | Homo sapiens |
| 55432     | YOD1 OTU deubiquinating enzyme 1 homolog ( <i>S. cerevisiae</i> )                                                                | Homo sapiens |
| 4885      | neuronal pentraxin II                                                                                                            | Homo sapiens |
| 192669    | eukaryotic translation initiation factor 2C, 3                                                                                   | Homo sapiens |
| 100132779 | serine/arginine repetitive matrix 2; hypothetical LOC100132779                                                                   | Homo sapiens |
| 176       | aggrecan                                                                                                                         | Homo sapiens |
| 221935    | sidekick homolog 1, cell adhesion molecule (chicken); hypothetical LOC730351                                                     | Homo sapiens |
| 730351    | sidekick homolog 1, cell adhesion molecule (chicken); hypothetical LOC730351                                                     | Homo sapiens |
| 10078     | tumor suppressing subtransferable candidate 4                                                                                    | Homo sapiens |
| 54914     | KIAA1797                                                                                                                         | Homo sapiens |
| 100129652 | hypothetical protein LOC100129652; ezrin                                                                                         | Homo sapiens |
| 81557     | melanoma antigen family D, 4B; melanoma antigen family D, 4                                                                      | Homo sapiens |
| 728239    | melanoma antigen family D, 4B; melanoma antigen family D, 4                                                                      | Homo sapiens |
| 51070     | nitric oxide synthase interacting protein                                                                                        | Homo sapiens |
| 84126     | ATR interacting protein                                                                                                          | Homo sapiens |
| 7156      | topoisomerase (DNA) III alpha                                                                                                    | Homo sapiens |
| 441089    | similar to cofactor required for Spl transcriptional activation, subunit 8, 34kDa; mediator complex subunit 27; CRSP8 pseudogene | Homo sapiens |
| 100134189 | similar to cofactor required for Spl transcriptional activation, subunit 8, 34kDa; mediator complex subunit 27; CRSP8 pseudogene | Homo sapiens |
| 9442      | similar to cofactor required for Spl transcriptional activation, subunit 8, 34kDa; mediator complex subunit 27; CRSP8 pseudogene | Homo sapiens |
| 10454     | mitogen-activated protein kinase kinase 7 interacting protein 1                                                                  | Homo sapiens |
| 699       | budding uninhibited by benzimidazoles 1 homolog (yeast)                                                                          | Homo sapiens |
| 53917     | RAB24, member RAS oncogene family                                                                                                | Homo sapiens |
| 55197     | regulation of nuclear pre-mRNA domain containing 1A                                                                              | Homo sapiens |
| 394       | Rho GTPase activating protein 5                                                                                                  | Homo sapiens |
| 10196     | protein arginine methyltransferase 3                                                                                             | Homo sapiens |
| 6631      | small nuclear ribonucleoprotein polypeptide C                                                                                    | Homo sapiens |
| 84164     | activating signal cointegrator 1 complex subunit 2                                                                               | Homo sapiens |
| 642954    | hypothetical LOC642954; retinoblastoma binding protein 4                                                                         | Homo sapiens |
| 4236      | microfibrillar-associated protein 1                                                                                              | Homo sapiens |
| 10471     | prefoldin subunit 6                                                                                                              | Homo sapiens |
| 51182     | heat shock 70kDa protein 14                                                                                                      | Homo sapiens |
| 23405     | dicer 1, ribonuclease type III                                                                                                   | Homo sapiens |
| 10460     | transforming, acidic coiled-coil containing protein 3                                                                            | Homo sapiens |
| 4148      | matrilin 3                                                                                                                       | Homo sapiens |
| 84946     | similar to putative protein STRF7; LTV1 homolog ( <i>S. cerevisiae</i> )                                                         | Homo sapiens |
| 100128319 | similar to putative protein STRF7; LTV1 homolog ( <i>S. cerevisiae</i> )                                                         | Homo sapiens |

|           |                                                                                                                                                                          |              |
|-----------|--------------------------------------------------------------------------------------------------------------------------------------------------------------------------|--------------|
| 91775     | family with sequence similarity 55, member C                                                                                                                             | Homo sapiens |
| 7268      | tetratricopeptide repeat domain 4                                                                                                                                        | Homo sapiens |
| 54496     | protein arginine methyltransferase 7                                                                                                                                     | Homo sapiens |
| 55170     | protein arginine methyltransferase 6                                                                                                                                     | Homo sapiens |
| 9993      | DiGeorge syndrome critical region gene 2                                                                                                                                 | Homo sapiens |
| 7186      | TNF receptor-associated factor 2                                                                                                                                         | Homo sapiens |
| 284252    | potassium channel tetramerisation domain containing 1                                                                                                                    | Homo sapiens |
| 8506      | contactin associated protein 1                                                                                                                                           | Homo sapiens |
| 54963     | uridine-cytidine kinase 1-like 1                                                                                                                                         | Homo sapiens |
| 2968      | general transcription factor IIH, polypeptide 4, 52kDa                                                                                                                   | Homo sapiens |
| 90390     | mediator complex subunit 30                                                                                                                                              | Homo sapiens |
| 80013     | chromosome 10 open reading frame 97                                                                                                                                      | Homo sapiens |
| 9969      | mediator complex subunit 13                                                                                                                                              | Homo sapiens |
| 9562      | multiple inositol polyphosphate histidine phosphatase, 1                                                                                                                 | Homo sapiens |
| 26015     | RNA polymerase II associated protein 1                                                                                                                                   | Homo sapiens |
| 8805      | tripartite motif-containing 24                                                                                                                                           | Homo sapiens |
| 80279     | CDK5 regulatory subunit associated protein 3                                                                                                                             | Homo sapiens |
| 11222     | mitochondrial ribosomal protein L3                                                                                                                                       | Homo sapiens |
| 10848     | protein phosphatase 1, regulatory (inhibitor) subunit 13 like                                                                                                            | Homo sapiens |
| 64708     | COP9 constitutive photomorphogenic homolog subunit 7B (Arabidopsis)                                                                                                      | Homo sapiens |
| 85364     | zinc finger, CCHC domain containing 3                                                                                                                                    | Homo sapiens |
| 54505     | DEAH (Asp-Glu-Ala-His) box polypeptide 29                                                                                                                                | Homo sapiens |
| 9589      | Wilms tumor 1 associated protein                                                                                                                                         | Homo sapiens |
| 9469      | carbohydrate (chondroitin 6) sulfotransferase 3                                                                                                                          | Homo sapiens |
| 11041     | UDP-GlcNAc:betaGal beta-1,3-N-acetylglucosaminyltransferase 1; UDP-GlcNAc:betaGal beta-1,3-N-acetylglucosaminyltransferase 2                                             | Homo sapiens |
| 29066     | zinc finger CCCH-type containing 7A                                                                                                                                      | Homo sapiens |
| 5191      | peroxisomal biogenesis factor 7                                                                                                                                          | Homo sapiens |
| 54464     | 5'-3' exoribonuclease 1                                                                                                                                                  | Homo sapiens |
| 84461     | neuralized homolog 4 (Drosophila)                                                                                                                                        | Homo sapiens |
| 79699     | zyg-11 homolog B (C. elegans)                                                                                                                                            | Homo sapiens |
| 79184     | BRCA1/BRCA2-containing complex, subunit 3                                                                                                                                | Homo sapiens |
| 22911     | WD repeat domain 47                                                                                                                                                      | Homo sapiens |
| 55723     | ASF1 anti-silencing function 1 homolog B (S. cerevisiae)                                                                                                                 | Homo sapiens |
| 653881    | ribosomal protein L3; similar to 60S ribosomal protein L3 (L4)                                                                                                           | Homo sapiens |
| 100130561 | high-mobility group box 1; high-mobility group box 1-like 10                                                                                                             | Homo sapiens |
| 5427      | polymerase (DNA directed), epsilon 2 (p59 subunit)                                                                                                                       | Homo sapiens |
| 10607     | transducin (beta)-like 3                                                                                                                                                 | Homo sapiens |
| 23367     | La ribonucleoprotein domain family, member 1                                                                                                                             | Homo sapiens |
| 64431     | ARP6 actin-related protein 6 homolog (yeast)                                                                                                                             | Homo sapiens |
| 64754     | SET and MYND domain containing 3                                                                                                                                         | Homo sapiens |
| 57448     | baculoviral IAP repeat-containing 6                                                                                                                                      | Homo sapiens |
| 11321     | GPN-loop GTPase 1                                                                                                                                                        | Homo sapiens |
| 10934     | mortality factor 4; mortality factor 4 like 1                                                                                                                            | Homo sapiens |
| 10933     | mortality factor 4; mortality factor 4 like 1                                                                                                                            | Homo sapiens |
| 338761    | complement component 1, q subcomponent-like 4                                                                                                                            | Homo sapiens |
| 646966    | ribosomal protein L26 pseudogene 33; ribosomal protein L26; ribosomal protein L26 pseudogene 16; ribosomal protein L26 pseudogene 19; ribosomal protein L26 pseudogene 6 | Homo sapiens |
| 100131526 | ribosomal protein L26 pseudogene 33; ribosomal protein L26; ribosomal protein L26 pseudogene 16; ribosomal protein L26 pseudogene 19; ribosomal protein L26 pseudogene 6 | Homo sapiens |
| 441073    | ribosomal protein L26 pseudogene 33; ribosomal protein L26; ribosomal protein L26 pseudogene 16; ribosomal protein L26 pseudogene 19; ribosomal protein L26 pseudogene 6 | Homo sapiens |
| 100132547 | ribosomal protein L26 pseudogene 33; ribosomal protein L26; ribosomal protein L26 pseudogene 16; ribosomal protein L26 pseudogene 19; ribosomal protein L26 pseudogene 6 | Homo sapiens |
| 400011    | suppressor of Ty 16 homolog (S. cerevisiae); suppressor of Ty 16 homolog (S. cerevisiae) pseudogene                                                                      | Homo sapiens |
| 51371     | proteasome maturation protein                                                                                                                                            | Homo sapiens |
| 8726      | embryonic ectoderm development                                                                                                                                           | Homo sapiens |
| 8924      | hect domain and RLD 2                                                                                                                                                    | Homo sapiens |
| 4548      | 5-methyltetrahydrofolate-homocysteine methyltransferase                                                                                                                  | Homo sapiens |
| 84364     | ADP-ribosylation factor GTPase activating protein 2                                                                                                                      | Homo sapiens |
| 54915     | YTH domain family, member 1                                                                                                                                              | Homo sapiens |
| 10100     | tetraspanin 2                                                                                                                                                            | Homo sapiens |
| 10847     | Snf2-related CREBBP activator protein                                                                                                                                    | Homo sapiens |
| 11230     | PRA1 domain family, member 2                                                                                                                                             | Homo sapiens |
| 11340     | exosome component 8                                                                                                                                                      | Homo sapiens |
| 11135     | CDC42 effector protein (Rho GTPase binding) 1                                                                                                                            | Homo sapiens |
| 642590    | spermine synthase; similar to spermine synthase                                                                                                                          | Homo sapiens |
| 646347    | spermine synthase; similar to spermine synthase                                                                                                                          | Homo sapiens |
| 51126     | N-acetyltransferase 5 (GCN5-related, putative)                                                                                                                           | Homo sapiens |
| 1676      | DNA fragmentation factor, 45kDa, alpha polypeptide                                                                                                                       | Homo sapiens |
| 26523     | eukaryotic translation initiation factor 2C, 1                                                                                                                           | Homo sapiens |
| 25896     | integrator complex subunit 7                                                                                                                                             | Homo sapiens |
| 440275    | eukaryotic translation initiation factor 2 alpha kinase 4                                                                                                                | Homo sapiens |
| 222229    | leucine-rich repeats and WD repeat domain containing 1                                                                                                                   | Homo sapiens |
| 8106      | poly(A) binding protein, nuclear 1                                                                                                                                       | Homo sapiens |

|           |                                                                                                                                                                          |              |
|-----------|--------------------------------------------------------------------------------------------------------------------------------------------------------------------------|--------------|
| 54665     | round spermatid basic protein 1                                                                                                                                          | Homo sapiens |
| 100291837 | similar to ribosomal protein S21                                                                                                                                         | Homo sapiens |
| 55112     | WD repeat domain 60                                                                                                                                                      | Homo sapiens |
| 8536      | calcium/calmodulin-dependent protein kinase I                                                                                                                            | Homo sapiens |
| 4790      | nuclear factor of kappa light polypeptide gene enhancer in B-cells 1                                                                                                     | Homo sapiens |
| 8021      | nucleoporin 214kDa                                                                                                                                                       | Homo sapiens |
| 283237    | tetratricopeptide repeat domain 9C                                                                                                                                       | Homo sapiens |
| 287       | ankyrin 2, neuronal                                                                                                                                                      | Homo sapiens |
| 27042     | chromosome 1 open reading frame 107                                                                                                                                      | Homo sapiens |
| 2549      | GRB2-associated binding protein 1                                                                                                                                        | Homo sapiens |
| 100037280 | ubiquitin-conjugating enzyme E2D 3 (UBC4/5 homolog, yeast); ubiquitin-conjugating enzyme E2D 3 pseudogene                                                                | Homo sapiens |
| 9815      | G protein-coupled receptor kinase interacting ArfGAP 2                                                                                                                   | Homo sapiens |
| 64146     | peptide deformylase (mitochondrial); component of oligomeric golgi complex 8                                                                                             | Homo sapiens |
| 84342     | peptide deformylase (mitochondrial); component of oligomeric golgi complex 8                                                                                             | Homo sapiens |
| 80222     | threonyl-tRNA synthetase 2, mitochondrial (putative)                                                                                                                     | Homo sapiens |
| 80227     | proteasomal ATPase-associated factor 1                                                                                                                                   | Homo sapiens |
| 55054     | ATG16 autophagy related 16-like 1 ( <i>S. cerevisiae</i> )                                                                                                               | Homo sapiens |
| 653877    | similar to Down-regulated in metastasis protein (Key-1A6 protein) (Novel nucleolar protein 73) (NNP73); UTP20, small subunit (SSU) processome component, homolog (yeast) | Homo sapiens |
| 723972    | hepatopoietin PCn127; acidic (leucine-rich) nuclear phosphoprotein 32 family, member A                                                                                   | Homo sapiens |
| 22950     | solute carrier family 4 (anion exchanger), member 1, adaptor protein                                                                                                     | Homo sapiens |
| 84135     | UTP15, U3 small nucleolar ribonucleoprotein, homolog ( <i>S. cerevisiae</i> )                                                                                            | Homo sapiens |
| 6456      | SH3-domain GRB2-like 2                                                                                                                                                   | Homo sapiens |
| 93627     | TBC domain-containing protein kinase-like                                                                                                                                | Homo sapiens |
| 644063    | heterogeneous nuclear ribonucleoprotein K; similar to heterogeneous nuclear ribonucleoprotein K                                                                          | Homo sapiens |
| 79786     | kelch-like 36 ( <i>Drosophila</i> )                                                                                                                                      | Homo sapiens |
| 23049     | SMG1 homolog, phosphatidylinositol 3-kinase-related kinase ( <i>C. elegans</i> )                                                                                         | Homo sapiens |
| 651610    | similar to Serine-protein kinase ATM (Ataxia telangiectasia mutated) (A-T, mutated); ataxia telangiectasia mutated                                                       | Homo sapiens |
| 472       | similar to Serine-protein kinase ATM (Ataxia telangiectasia mutated) (A-T, mutated); ataxia telangiectasia mutated                                                       | Homo sapiens |
| 8019      | bromodomain containing 3                                                                                                                                                 | Homo sapiens |
| 4289      | muskelin 1, intracellular mediator containing kelch motifs                                                                                                               | Homo sapiens |
| 728642    | similar to cell division cycle 2-like 1 (PITSLRE proteins); cell division cycle 2-like 1 (PITSLRE proteins); cell division cycle 2-like 2 (PITSLRE proteins)             | Homo sapiens |
| 100133692 | similar to cell division cycle 2-like 1 (PITSLRE proteins); cell division cycle 2-like 1 (PITSLRE proteins); cell division cycle 2-like 2 (PITSLRE proteins)             | Homo sapiens |
| 197370    | non-SMC element 1 homolog ( <i>S. cerevisiae</i> )                                                                                                                       | Homo sapiens |
| 11080     | DnaJ (Hsp40) homolog, subfamily B, member 4                                                                                                                              | Homo sapiens |
| 9140      | ATG12 autophagy related 12 homolog ( <i>S. cerevisiae</i> )                                                                                                              | Homo sapiens |
| 727726    | similar to poly (ADP-ribose) glycohydrolase; poly (ADP-ribose) glycohydrolase                                                                                            | Homo sapiens |
| 8505      | similar to poly (ADP-ribose) glycohydrolase; poly (ADP-ribose) glycohydrolase                                                                                            | Homo sapiens |
| 79735     | TBC1 domain family, member 17                                                                                                                                            | Homo sapiens |
| 1029      | cyclin-dependent kinase inhibitor 2A (melanoma, p16, inhibits CDK4)                                                                                                      | Homo sapiens |
| 147700    | kinesin light chain 3                                                                                                                                                    | Homo sapiens |
| 5564      | protein kinase, AMP-activated, beta 1 non-catalytic subunit                                                                                                              | Homo sapiens |
| 4524      | 5,10-methylenetetrahydrofolate reductase (NADPH)                                                                                                                         | Homo sapiens |
| 55626     | autophagy/beclin-1 regulator 1                                                                                                                                           | Homo sapiens |
| 55072     | ring finger protein 31                                                                                                                                                   | Homo sapiens |
| 57646     | ubiquitin specific peptidase 28                                                                                                                                          | Homo sapiens |
| 100271831 | hypothetical LOC100271831; mitogen-activated protein kinase 3                                                                                                            | Homo sapiens |
| 55142     | HAUS augmin-like complex, subunit 2                                                                                                                                      | Homo sapiens |
| 79613     | transmembrane and coiled-coil domains 7                                                                                                                                  | Homo sapiens |
| 3092      | huntingtin interacting protein 1                                                                                                                                         | Homo sapiens |
| 5557      | primase, DNA, polypeptide 1 (49kDa)                                                                                                                                      | Homo sapiens |
| 57707     | KIAA1609                                                                                                                                                                 | Homo sapiens |
| 729494    | similar to actin related protein 2/3 complex subunit 3; hypothetical LOC729841; actin related protein 2/3 complex, subunit 3, 21kDa                                      | Homo sapiens |
| 729841    | similar to actin related protein 2/3 complex subunit 3; hypothetical LOC729841; actin related protein 2/3 complex, subunit 3, 21kDa                                      | Homo sapiens |
| 9360      | peptidylprolyl isomerase G (cyclophilin G)                                                                                                                               | Homo sapiens |
| 80306     | mediator complex subunit 28                                                                                                                                              | Homo sapiens |
| 79726     | WD repeat domain 59                                                                                                                                                      | Homo sapiens |
| 51626     | dynein, cytoplasmic 2, light intermediate chain 1                                                                                                                        | Homo sapiens |
| 51133     | potassium channel tetramerisation domain containing 3                                                                                                                    | Homo sapiens |
| 731751    | similar to protein kinase, DNA-activated, catalytic polypeptide; protein kinase, DNA-activated, catalytic polypeptide                                                    | Homo sapiens |
| 79577     | cell division cycle 73, Paf1/RNA polymerase II complex component, homolog ( <i>S. cerevisiae</i> )                                                                       | Homo sapiens |
| 91369     | ankyrin repeat domain 40                                                                                                                                                 | Homo sapiens |
| 55746     | nucleoporin 133kDa                                                                                                                                                       | Homo sapiens |
| 92104     | tetratricopeptide repeat domain 30A                                                                                                                                      | Homo sapiens |

|           |                                                                                                                                                                                           |              |
|-----------|-------------------------------------------------------------------------------------------------------------------------------------------------------------------------------------------|--------------|
| 85313     | peptidylprolyl isomerase (cyclophilin)-like 4                                                                                                                                             | Homo sapiens |
| 11065     | ubiquitin-conjugating enzyme E2C                                                                                                                                                          | Homo sapiens |
| 80020     | FAD-dependent oxidoreductase domain containing 2                                                                                                                                          | Homo sapiens |
| 51747     | cisplatin resistance-associated overexpressed protein                                                                                                                                     | Homo sapiens |
| 57539     | WD repeat domain 35                                                                                                                                                                       | Homo sapiens |
| 80304     | chromosome 2 open reading frame 44                                                                                                                                                        | Homo sapiens |
| 100131294 | RAB13, member RAS oncogene family; similar to hCG24991                                                                                                                                    | Homo sapiens |
| 84950     | PRP38 pre-mRNA processing factor 38 (yeast) domain containing A                                                                                                                           | Homo sapiens |
| 474383    | coagulation factor VIII-associated (intronic transcript) 2; coagulation factor VIII-associated (intronic transcript) 3; coagulation factor VIII-associated (intronic transcript) 1        | Homo sapiens |
| 8263      | coagulation factor VIII-associated (intronic transcript) 2; coagulation factor VIII-associated (intronic transcript) 3; coagulation factor VIII-associated (intronic transcript) 1        | Homo sapiens |
| 474384    | coagulation factor VIII-associated (intronic transcript) 2; coagulation factor VIII-associated (intronic transcript) 3; coagulation factor VIII-associated (intronic transcript) 1        | Homo sapiens |
| 10179     | RNA binding motif protein 7                                                                                                                                                               | Homo sapiens |
| 51742     | AT rich interactive domain 4B (RBP1-like)                                                                                                                                                 | Homo sapiens |
| 55759     | WD repeat domain 12                                                                                                                                                                       | Homo sapiens |
| 83667     | sestrin 2                                                                                                                                                                                 | Homo sapiens |
| 51003     | mediator complex subunit 31                                                                                                                                                               | Homo sapiens |
| 55206     | strawberry notch homolog 1 (Drosophila)                                                                                                                                                   | Homo sapiens |
| 51693     | trafficking protein particle complex 2-like                                                                                                                                               | Homo sapiens |
| 9456      | homer homolog 1 (Drosophila)                                                                                                                                                              | Homo sapiens |
| 1158      | creatine kinase, muscle                                                                                                                                                                   | Homo sapiens |
| 2332      | fragile X mental retardation 1                                                                                                                                                            | Homo sapiens |
| 100130107 | ribosomal protein S3A pseudogene 5; ribosomal protein S3a pseudogene 47; ribosomal protein S3a pseudogene 49; ribosomal protein S3A; hypothetical LOC100131699; hypothetical LOC100130107 | Homo sapiens |
| 146053    | ribosomal protein S3A pseudogene 5; ribosomal protein S3a pseudogene 47; ribosomal protein S3a pseudogene 49; ribosomal protein S3A; hypothetical LOC100131699; hypothetical LOC100130107 | Homo sapiens |
| 100131699 | ribosomal protein S3A pseudogene 5; ribosomal protein S3a pseudogene 47; ribosomal protein S3a pseudogene 49; ribosomal protein S3A; hypothetical LOC100131699; hypothetical LOC100130107 | Homo sapiens |
| 400652    | ribosomal protein S3A pseudogene 5; ribosomal protein S3a pseudogene 47; ribosomal protein S3a pseudogene 49; ribosomal protein S3A; hypothetical LOC100131699; hypothetical LOC100130107 | Homo sapiens |
| 439992    | ribosomal protein S3A pseudogene 5; ribosomal protein S3a pseudogene 47; ribosomal protein S3a pseudogene 49; ribosomal protein S3A; hypothetical LOC100131699; hypothetical LOC100130107 | Homo sapiens |
| 7092      | tolloid-like 1                                                                                                                                                                            | Homo sapiens |
| 25842     | ASF1 anti-silencing function 1 homolog A (S. cerevisiae)                                                                                                                                  | Homo sapiens |
| 23001     | WD repeat and FYVE domain containing 3                                                                                                                                                    | Homo sapiens |
| 7298      | thymidylate synthetase                                                                                                                                                                    | Homo sapiens |
| 10371     | sema domain, immunoglobulin domain (Ig), short basic domain, secreted, (semaphorin) 3A                                                                                                    | Homo sapiens |
| 731605    | similar to Bcl-2-associated transcription factor 1 (Btf); BCL2-associated transcription factor 1                                                                                          | Homo sapiens |
| 9774      | similar to Bcl-2-associated transcription factor 1 (Btf); BCL2-associated transcription factor 1                                                                                          | Homo sapiens |
| 3839      | karyopherin alpha 3 (importin alpha 4)                                                                                                                                                    | Homo sapiens |
| 55854     | zinc finger CCCH-type containing 15                                                                                                                                                       | Homo sapiens |
| 10914     | poly(A) polymerase alpha                                                                                                                                                                  | Homo sapiens |
| 10799     | ribonuclease P/MRP 40kDa subunit                                                                                                                                                          | Homo sapiens |
| 100129882 | ribosomal protein L31 pseudogene 49; ribosomal protein L31 pseudogene 17; ribosomal protein L31                                                                                           | Homo sapiens |
| 653773    | ribosomal protein L31 pseudogene 49; ribosomal protein L31 pseudogene 17; ribosomal protein L31                                                                                           | Homo sapiens |
| 253959    | GTPase activating Rap/RanGAP domain-like 1                                                                                                                                                | Homo sapiens |
| 54821     | excision repair cross-complementing rodent repair deficiency, complementation group 6-like                                                                                                | Homo sapiens |
| 9403      | 15 kDa selenoprotein                                                                                                                                                                      | Homo sapiens |
| 26019     | UPF2 regulator of nonsense transcripts homolog (yeast)                                                                                                                                    | Homo sapiens |
| 57508     | integrator complex subunit 2                                                                                                                                                              | Homo sapiens |
| 79023     | nucleoporin 37kDa                                                                                                                                                                         | Homo sapiens |
| 29079     | mediator complex subunit 4                                                                                                                                                                | Homo sapiens |
| 6198      | ribosomal protein S6 kinase, 70kDa, polypeptide 1                                                                                                                                         | Homo sapiens |
| 79719     | alpha- and gamma-adaptin-binding protein p34                                                                                                                                              | Homo sapiens |
| 55837     | E2F-associated phosphoprotein                                                                                                                                                             | Homo sapiens |
| 23074     | UHRF1 binding protein 1-like                                                                                                                                                              | Homo sapiens |
| 9873      | FCH and double SH3 domains 2                                                                                                                                                              | Homo sapiens |
| 55802     | DCP1 decapping enzyme homolog A (S. cerevisiae)                                                                                                                                           | Homo sapiens |
| 23527     | ArfGAP with coiled-coil, ankyrin repeat and PH domains 2                                                                                                                                  | Homo sapiens |
| 9026      | huntingtin interacting protein 1 related                                                                                                                                                  | Homo sapiens |
| 100132973 | similar to elongin C; transcription elongation factor B (SIII), polypeptide 1 (15kDa, elongin C)                                                                                          | Homo sapiens |
| 253714    | chromosome 6 open reading frame 167                                                                                                                                                       | Homo sapiens |
| 22828     | RNA binding motif protein 16                                                                                                                                                              | Homo sapiens |

|           |                                                                                                                                                                                                                                                                                                                                                                                                    |              |
|-----------|----------------------------------------------------------------------------------------------------------------------------------------------------------------------------------------------------------------------------------------------------------------------------------------------------------------------------------------------------------------------------------------------------|--------------|
| 6480      | ST6 beta-galactosamide alpha-2,6-sialyltransferase 1                                                                                                                                                                                                                                                                                                                                               | Homo sapiens |
| 23431     | adaptor-related protein complex 4, epsilon 1 subunit                                                                                                                                                                                                                                                                                                                                               | Homo sapiens |
| 9039      | ubiquitin-like modifier activating enzyme 3                                                                                                                                                                                                                                                                                                                                                        | Homo sapiens |
| 9779      | TBC1 domain family, member 5                                                                                                                                                                                                                                                                                                                                                                       | Homo sapiens |
| 22980     | transcription factor 25 (basic helix-loop-helix)                                                                                                                                                                                                                                                                                                                                                   | Homo sapiens |
| 29888     | striatin, calmodulin binding protein 4                                                                                                                                                                                                                                                                                                                                                             | Homo sapiens |
| 79677     | structural maintenance of chromosomes 6                                                                                                                                                                                                                                                                                                                                                            | Homo sapiens |
| 441228    | exportin, tRNA (nuclear export receptor for tRNAs); similar to Exportin-T (tRNA exportin) (Exportin(tRNA))                                                                                                                                                                                                                                                                                         | Homo sapiens |
| 6604      | SWI/SNF related, matrix associated, actin dependent regulator of chromatin, subfamily d, member 3                                                                                                                                                                                                                                                                                                  | Homo sapiens |
| 55127     | HEAT repeat containing 1                                                                                                                                                                                                                                                                                                                                                                           | Homo sapiens |
| 344593    | protein tyrosine phosphatase, non-receptor type 11; similar to protein tyrosine phosphatase, non-receptor type 11                                                                                                                                                                                                                                                                                  | Homo sapiens |
| 442113    | protein tyrosine phosphatase, non-receptor type 11; similar to protein tyrosine phosphatase, non-receptor type 11                                                                                                                                                                                                                                                                                  | Homo sapiens |
| 26091     | hect domain and RLD 4                                                                                                                                                                                                                                                                                                                                                                              | Homo sapiens |
| 56916     | SWI/SNF-related, matrix-associated actin-dependent regulator of chromatin, subfamily a, containing DEAD/H box 1                                                                                                                                                                                                                                                                                    | Homo sapiens |
| 374383    | hypothetical protein DKFZp686024166                                                                                                                                                                                                                                                                                                                                                                | Homo sapiens |
| 266722    | heparan sulfate 6-O-sulfotransferase 3                                                                                                                                                                                                                                                                                                                                                             | Homo sapiens |
| 5108      | pericentriolar material 1                                                                                                                                                                                                                                                                                                                                                                          | Homo sapiens |
| 9064      | mitogen-activated protein kinase kinase kinase 6                                                                                                                                                                                                                                                                                                                                                   | Homo sapiens |
| 644101    | similar to chromobox homolog 3; chromobox homolog 3 (HPI gamma homolog, Drosophila)                                                                                                                                                                                                                                                                                                                | Homo sapiens |
| 391358    | tRNA methyltransferase 11-2 homolog (S. cerevisiae); similar to CG12975                                                                                                                                                                                                                                                                                                                            | Homo sapiens |
| 149951    | COMM domain containing 7                                                                                                                                                                                                                                                                                                                                                                           | Homo sapiens |
| 11137     | PWP1 homolog (S. cerevisiae)                                                                                                                                                                                                                                                                                                                                                                       | Homo sapiens |
| 89890     | kelch repeat and BTB (POZ) domain containing 6                                                                                                                                                                                                                                                                                                                                                     | Homo sapiens |
| 10241     | calcium binding and coiled-coil domain 2                                                                                                                                                                                                                                                                                                                                                           | Homo sapiens |
| 653888    | actin related protein 2/3 complex, subunit 1B, 41kDa; similar to Actin-related protein 2/3 complex subunit 1B (ARP2/3 complex 41 kDa subunit) (p41-ARC)                                                                                                                                                                                                                                            | Homo sapiens |
| 140775    | Smith-Magenis syndrome chromosome region, candidate 8                                                                                                                                                                                                                                                                                                                                              | Homo sapiens |
| 57122     | nucleoporin 107kDa                                                                                                                                                                                                                                                                                                                                                                                 | Homo sapiens |
| 9325      | thyroid hormone receptor interactor 4                                                                                                                                                                                                                                                                                                                                                              | Homo sapiens |
| 9374      | palmitoyl-protein thioesterase 2                                                                                                                                                                                                                                                                                                                                                                   | Homo sapiens |
| 64132     | xylosyltransferase II                                                                                                                                                                                                                                                                                                                                                                              | Homo sapiens |
| 646483    | ribosomal protein L6 pseudogene 27; ribosomal protein L6 pseudogene 19; ribosomal protein L6; ribosomal protein L6 pseudogene 10                                                                                                                                                                                                                                                                   | Homo sapiens |
| 642828    | ribosomal protein L6 pseudogene 27; ribosomal protein L6 pseudogene 19; ribosomal protein L6; ribosomal protein L6 pseudogene 10                                                                                                                                                                                                                                                                   | Homo sapiens |
| 645387    | ribosomal protein L6 pseudogene 27; ribosomal protein L6 pseudogene 19; ribosomal protein L6; ribosomal protein L6 pseudogene 10                                                                                                                                                                                                                                                                   | Homo sapiens |
| 4884      | neuronal pentraxin I                                                                                                                                                                                                                                                                                                                                                                               | Homo sapiens |
| 729046    | ribosomal protein L17 pseudogene 22; ribosomal protein L17 pseudogene 36; ribosomal protein L17 pseudogene 20; similar to ribosomal protein L17; ribosomal protein L17 pseudogene 33; ribosomal protein L17 pseudogene 34; ribosomal protein L17 pseudogene 9; ribosomal protein L17; ribosomal protein L17 pseudogene 18; ribosomal protein L17 pseudogene 7; ribosomal protein L17 pseudogene 39 | Homo sapiens |
| 100129657 | ribosomal protein L17 pseudogene 22; ribosomal protein L17 pseudogene 36; ribosomal protein L17 pseudogene 20; similar to ribosomal protein L17; ribosomal protein L17 pseudogene 33; ribosomal protein L17 pseudogene 34; ribosomal protein L17 pseudogene 9; ribosomal protein L17; ribosomal protein L17 pseudogene 18; ribosomal protein L17 pseudogene 7; ribosomal protein L17 pseudogene 39 | Homo sapiens |
| 643863    | ribosomal protein L17 pseudogene 22; ribosomal protein L17 pseudogene 36; ribosomal protein L17 pseudogene 20; similar to ribosomal protein L17; ribosomal protein L17 pseudogene 33; ribosomal protein L17 pseudogene 34; ribosomal protein L17 pseudogene 9; ribosomal protein L17; ribosomal protein L17 pseudogene 18; ribosomal protein L17 pseudogene 7; ribosomal protein L17 pseudogene 39 | Homo sapiens |
| 100132742 | ribosomal protein L17 pseudogene 22; ribosomal protein L17 pseudogene 36; ribosomal protein L17 pseudogene 20; similar to ribosomal protein L17; ribosomal protein L17 pseudogene 33; ribosomal protein L17 pseudogene 34; ribosomal protein L17 pseudogene 9; ribosomal protein L17; ribosomal protein L17 pseudogene 18; ribosomal protein L17 pseudogene 7; ribosomal protein L17 pseudogene 39 | Homo sapiens |
| 729301    | ribosomal protein L17 pseudogene 22; ribosomal protein L17 pseudogene 36; ribosomal protein L17 pseudogene 20; similar to ribosomal protein L17; ribosomal protein L17 pseudogene 33; ribosomal protein L17 pseudogene 34; ribosomal protein L17 pseudogene 9; ribosomal protein L17; ribosomal protein L17 pseudogene 18; ribosomal protein L17 pseudogene 7; ribosomal protein L17 pseudogene 39 | Homo sapiens |

|        |                                                                                                                                                                                                                                                                                                                                                                                                    |              |
|--------|----------------------------------------------------------------------------------------------------------------------------------------------------------------------------------------------------------------------------------------------------------------------------------------------------------------------------------------------------------------------------------------------------|--------------|
| 727984 | ribosomal protein L17 pseudogene 22; ribosomal protein L17 pseudogene 36; ribosomal protein L17 pseudogene 20; similar to ribosomal protein L17; ribosomal protein L17 pseudogene 33; ribosomal protein L17 pseudogene 34; ribosomal protein L17 pseudogene 9; ribosomal protein L17; ribosomal protein L17 pseudogene 18; ribosomal protein L17 pseudogene 7; ribosomal protein L17 pseudogene 39 | Homo sapiens |
| 646909 | ribosomal protein L17 pseudogene 22; ribosomal protein L17 pseudogene 36; ribosomal protein L17 pseudogene 20; similar to ribosomal protein L17; ribosomal protein L17 pseudogene 33; ribosomal protein L17 pseudogene 34; ribosomal protein L17 pseudogene 9; ribosomal protein L17; ribosomal protein L17 pseudogene 18; ribosomal protein L17 pseudogene 7; ribosomal protein L17 pseudogene 39 | Homo sapiens |
| 645296 | ribosomal protein L17 pseudogene 22; ribosomal protein L17 pseudogene 36; ribosomal protein L17 pseudogene 20; similar to ribosomal protein L17; ribosomal protein L17 pseudogene 33; ribosomal protein L17 pseudogene 34; ribosomal protein L17 pseudogene 9; ribosomal protein L17; ribosomal protein L17 pseudogene 18; ribosomal protein L17 pseudogene 7; ribosomal protein L17 pseudogene 39 | Homo sapiens |
| 391655 | ribosomal protein L17 pseudogene 22; ribosomal protein L17 pseudogene 36; ribosomal protein L17 pseudogene 20; similar to ribosomal protein L17; ribosomal protein L17 pseudogene 33; ribosomal protein L17 pseudogene 34; ribosomal protein L17 pseudogene 9; ribosomal protein L17; ribosomal protein L17 pseudogene 18; ribosomal protein L17 pseudogene 7; ribosomal protein L17 pseudogene 39 | Homo sapiens |
| 729340 | ribosomal protein L17 pseudogene 22; ribosomal protein L17 pseudogene 36; ribosomal protein L17 pseudogene 20; similar to ribosomal protein L17; ribosomal protein L17 pseudogene 33; ribosomal protein L17 pseudogene 34; ribosomal protein L17 pseudogene 9; ribosomal protein L17; ribosomal protein L17 pseudogene 18; ribosomal protein L17 pseudogene 7; ribosomal protein L17 pseudogene 39 | Homo sapiens |
| 79586  | chondroitin polymerizing factor                                                                                                                                                                                                                                                                                                                                                                    | Homo sapiens |
| 24140  | FtsJ homolog 1 (E. coli)                                                                                                                                                                                                                                                                                                                                                                           | Homo sapiens |
| 64087  | methylcrotonoyl-Coenzyme A carboxylase 2 (beta)                                                                                                                                                                                                                                                                                                                                                    | Homo sapiens |
| 10403  | NDC80 homolog, kinetochore complex component (S. cerevisiae)                                                                                                                                                                                                                                                                                                                                       | Homo sapiens |
| 1657   | Dmx-like 1                                                                                                                                                                                                                                                                                                                                                                                         | Homo sapiens |
| 6119   | replication protein A3, 14kDa                                                                                                                                                                                                                                                                                                                                                                      | Homo sapiens |
| 5422   | polymerase (DNA directed), alpha 1, catalytic subunit                                                                                                                                                                                                                                                                                                                                              | Homo sapiens |
| 9684   | leucine rich repeat containing 14                                                                                                                                                                                                                                                                                                                                                                  | Homo sapiens |
| 55738  | ADP-ribosylation factor GTPase activating protein 1                                                                                                                                                                                                                                                                                                                                                | Homo sapiens |
| 652346 | promyelocytic leukemia; similar to promyelocytic leukemia protein isoform 1                                                                                                                                                                                                                                                                                                                        | Homo sapiens |
| 5371   | promyelocytic leukemia; similar to promyelocytic leukemia protein isoform 1                                                                                                                                                                                                                                                                                                                        | Homo sapiens |
| 1105   | chromodomain helicase DNA binding protein 1                                                                                                                                                                                                                                                                                                                                                        | Homo sapiens |
| 728532 | similar to dynein cytoplasmic 1 intermediate chain 2; dynein, cytoplasmic 1, intermediate chain 2                                                                                                                                                                                                                                                                                                  | Homo sapiens |
| 548645 | DnaJ (Hsp40) homolog, subfamily C , member 25; guanine nucleotide binding protein (G protein), gamma 10; DNAJC25-GNG10 readthrough transcript                                                                                                                                                                                                                                                      | Homo sapiens |
| 552891 | DnaJ (Hsp40) homolog, subfamily C , member 25; guanine nucleotide binding protein (G protein), gamma 10; DNAJC25-GNG10 readthrough transcript                                                                                                                                                                                                                                                      | Homo sapiens |
| 92675  | histidyl-tRNA synthetase 2, mitochondrial (putative); D-tyrosyl-tRNA deacylase 1 homolog (S. cerevisiae)                                                                                                                                                                                                                                                                                           | Homo sapiens |
| 55023  | pleckstrin homology domain interacting protein                                                                                                                                                                                                                                                                                                                                                     | Homo sapiens |
| 646791 | similar to Acidic leucine-rich nuclear phosphoprotein 32 family member B (PHAPI2 protein) (Silver-stainable protein SSP29) (Acidic protein rich in leucines); acidic (leucine-rich) nuclear phosphoprotein 32 family, member B                                                                                                                                                                     | Homo sapiens |
| 22902  | RUN and FYVE domain containing 3                                                                                                                                                                                                                                                                                                                                                                   | Homo sapiens |
| 79050  | nucleolar complex associated 4 homolog (S. cerevisiae)                                                                                                                                                                                                                                                                                                                                             | Homo sapiens |
| 5393   | exosome component 9                                                                                                                                                                                                                                                                                                                                                                                | Homo sapiens |
| 23063  | wings apart-like homolog (Drosophila)                                                                                                                                                                                                                                                                                                                                                              | Homo sapiens |
| 116966 | WD repeat domain 17                                                                                                                                                                                                                                                                                                                                                                                | Homo sapiens |
| 390284 | signal recognition particle 14kDa (homologous Alu RNA binding protein) pseudogene 1; signal recognition particle 14kDa (homologous Alu RNA binding protein)                                                                                                                                                                                                                                        | Homo sapiens |
| 8720   | membrane-bound transcription factor peptidase, site 1                                                                                                                                                                                                                                                                                                                                              | Homo sapiens |
| 80760  | inter-alpha (globulin) inhibitor H5                                                                                                                                                                                                                                                                                                                                                                | Homo sapiens |
| 55317  | chromosome 20 open reading frame 29                                                                                                                                                                                                                                                                                                                                                                | Homo sapiens |
| 55596  | zinc finger, CCHC domain containing 8                                                                                                                                                                                                                                                                                                                                                              | Homo sapiens |
| 10296  | macrophage erythroblast attacher                                                                                                                                                                                                                                                                                                                                                                   | Homo sapiens |
| 1340   | cytochrome c oxidase subunit Vib polypeptide 1 (ubiquitous)                                                                                                                                                                                                                                                                                                                                        | Homo sapiens |
| 3267   | ArfGAP with FG repeats 1                                                                                                                                                                                                                                                                                                                                                                           | Homo sapiens |
| 646766 | ribosomal protein L35; ribosomal protein L35 pseudogene 1; ribosomal protein L35 pseudogene 2                                                                                                                                                                                                                                                                                                      | Homo sapiens |
| 440737 | ribosomal protein L35; ribosomal protein L35 pseudogene 1; ribosomal protein L35 pseudogene 2                                                                                                                                                                                                                                                                                                      | Homo sapiens |
| 125950 | ribonucleoprotein, PTB-binding 1                                                                                                                                                                                                                                                                                                                                                                   | Homo sapiens |
| 10947  | adaptor-related protein complex 3, mu 2 subunit                                                                                                                                                                                                                                                                                                                                                    | Homo sapiens |
| 27429  | HtrA serine peptidase 2                                                                                                                                                                                                                                                                                                                                                                            | Homo sapiens |
| 55203  | leucine-rich repeat LGI family, member 2                                                                                                                                                                                                                                                                                                                                                           | Homo sapiens |
| 116461 | tRNA splicing endonuclease 15 homolog (S. cerevisiae)                                                                                                                                                                                                                                                                                                                                              | Homo sapiens |
| 5929   | retinoblastoma binding protein 5                                                                                                                                                                                                                                                                                                                                                                   | Homo sapiens |
| 390282 | eukaryotic translation initiation factor 3, subunit F; similar to hCG2040283                                                                                                                                                                                                                                                                                                                       | Homo sapiens |



|           |                                                                                                                                                                                                       |              |
|-----------|-------------------------------------------------------------------------------------------------------------------------------------------------------------------------------------------------------|--------------|
| 26160     | intraflagellar transport 172 homolog (Chlamydomonas)                                                                                                                                                  | Homo sapiens |
| 81608     | FIPI like 1 (S. cerevisiae)                                                                                                                                                                           | Homo sapiens |
| 10671     | dynactin 6                                                                                                                                                                                            | Homo sapiens |
| 727826    | ribosomal protein S11 pseudogene 5; ribosomal protein S11                                                                                                                                             | Homo sapiens |
| 286749    | stonin 1; STON1-GTF2A1L readthrough transcript; general transcription factor IIA, 1-like                                                                                                              | Homo sapiens |
| 11037     | stonin 1; STON1-GTF2A1L readthrough transcript; general transcription factor IIA, 1-like                                                                                                              | Homo sapiens |
| 11036     | stonin 1; STON1-GTF2A1L readthrough transcript; general transcription factor IIA, 1-like                                                                                                              | Homo sapiens |
| 5875      | Rab geranylgeranyltransferase, alpha subunit                                                                                                                                                          | Homo sapiens |
| 51631     | LUC7-like 2 (S. cerevisiae)                                                                                                                                                                           | Homo sapiens |
| 7328      | ubiquitin-conjugating enzyme E2H (UBC8 homolog, yeast)                                                                                                                                                | Homo sapiens |
| 6791      | aurora kinase A; aurora kinase A pseudogene 1                                                                                                                                                         | Homo sapiens |
| 6790      | aurora kinase A; aurora kinase A pseudogene 1                                                                                                                                                         | Homo sapiens |
| 114884    | oxysterol binding protein-like 10                                                                                                                                                                     | Homo sapiens |
| 5082      | phosducin-like                                                                                                                                                                                        | Homo sapiens |
| 10906     | TRAF-type zinc finger domain containing 1                                                                                                                                                             | Homo sapiens |
| 100130711 | similar to hCG1778032; RAB35, member RAS oncogene family                                                                                                                                              | Homo sapiens |
| 79058     | alveolar soft part sarcoma chromosome region, candidate 1                                                                                                                                             | Homo sapiens |
| 9913      | suppressor of Ty 7 (S. cerevisiae)-like                                                                                                                                                               | Homo sapiens |
| 83448     | pseudouridylyl synthase 7 homolog (S. cerevisiae)-like                                                                                                                                                | Homo sapiens |
| 4796      | nuclear factor of kappa light polypeptide gene enhancer in B-cells inhibitor-like 2                                                                                                                   | Homo sapiens |
| 54859     | chromosome 3 open reading frame 75                                                                                                                                                                    | Homo sapiens |
| 51098     | intraflagellar transport 52 homolog (Chlamydomonas)                                                                                                                                                   | Homo sapiens |
| 9158      | fibroblast growth factor (acidic) intracellular binding protein                                                                                                                                       | Homo sapiens |
| 732446    | similar to growth arrest-specific 6; growth arrest-specific 6                                                                                                                                         | Homo sapiens |
| 84062     | dystrobrevin binding protein 1                                                                                                                                                                        | Homo sapiens |
| 57452     | UDP-N-acetyl-alpha-D-galactosamine:polypeptide N-acetylgalactosaminyltransferase-like 1                                                                                                               | Homo sapiens |
| 205428    | chromosome 3 open reading frame 58                                                                                                                                                                    | Homo sapiens |
| 10283     | serologically defined colon cancer antigen 10                                                                                                                                                         | Homo sapiens |
| 9698      | pumilio homolog 1 (Drosophila)                                                                                                                                                                        | Homo sapiens |
| 90161     | heparan sulfate 6-O-sulfotransferase 2                                                                                                                                                                | Homo sapiens |
| 643949    | ribosomal protein, large, P2 pseudogene 3; ribosomal protein, large, P2                                                                                                                               | Homo sapiens |
| 131870    | nudix (nucleoside diphosphate linked moiety X)-type motif 16                                                                                                                                          | Homo sapiens |
| 341378    | hypothetical LOC341378; thyroid hormone receptor interactor 11                                                                                                                                        | Homo sapiens |
| 29919     | chromosome 18 open reading frame 8                                                                                                                                                                    | Homo sapiens |
| 55341     | large subunit GTPase 1 homolog (S. cerevisiae)                                                                                                                                                        | Homo sapiens |
| 64744     | small ArfGAP2                                                                                                                                                                                         | Homo sapiens |
| 25962     | KIAA1429                                                                                                                                                                                              | Homo sapiens |
| 64943     | 5'-nucleotidase domain containing 2                                                                                                                                                                   | Homo sapiens |
| 727896    | cysteine and histidine-rich domain (CHORD)-containing 1; cysteine and histidine-rich domain (CHORD)-containing 1 pseudogene                                                                           | Homo sapiens |
| 25942     | SIN3 homolog A, transcription regulator (yeast)                                                                                                                                                       | Homo sapiens |
| 134430    | WD repeat domain 36                                                                                                                                                                                   | Homo sapiens |
| 392301    | solute carrier family 25 (mitochondrial carrier; adenine nucleotide translocator), member 5; solute carrier family 25 (mitochondrial carrier; adenine nucleotide translocator), member 5 pseudogene 8 | Homo sapiens |
| 8905      | adaptor-related protein complex 1, sigma 2 subunit pseudogene; adaptor-related protein complex 1, sigma 2 subunit                                                                                     | Homo sapiens |
| 653653    | adaptor-related protein complex 1, sigma 2 subunit pseudogene; adaptor-related protein complex 1, sigma 2 subunit                                                                                     | Homo sapiens |
| 652826    | similar to 26S protease regulatory subunit 6B (MIP224) (MB67-interacting protein) (TAT-binding protein 7) (TBP-7); proteasome (prosome, macropain) 26S subunit, ATPase, 4                             | Homo sapiens |
| 55055     | Zwilch, kinetochore associated, homolog (Drosophila)                                                                                                                                                  | Homo sapiens |
| 7517      | X-ray repair complementing defective repair in Chinese hamster cells 3                                                                                                                                | Homo sapiens |
| 57464     | family with sequence similarity 40, member B                                                                                                                                                          | Homo sapiens |
| 646243    | coxsackie virus and adenovirus receptor pseudogene 2; coxsackie virus and adenovirus receptor                                                                                                         | Homo sapiens |
| 643167    | similar to RNA binding motif protein 39; RNA binding motif protein 39                                                                                                                                 | Homo sapiens |
| 751867    | regulator of chromosome condensation 1; SNHG3-RCC1 readthrough transcript                                                                                                                             | Homo sapiens |
| 6596      | helicase-like transcription factor                                                                                                                                                                    | Homo sapiens |
| 58497     | prune homolog (Drosophila)                                                                                                                                                                            | Homo sapiens |
| 23048     | formin binding protein 1                                                                                                                                                                              | Homo sapiens |
| 9735      | kinetochore associated 1                                                                                                                                                                              | Homo sapiens |
| 23595     | origin recognition complex, subunit 3-like (yeast)                                                                                                                                                    | Homo sapiens |
| 54552     | guanine nucleotide binding protein-like 3 (nucleolar)-like                                                                                                                                            | Homo sapiens |
| 5347      | polo-like kinase 1 (Drosophila)                                                                                                                                                                       | Homo sapiens |
| 25917     | THUMP domain containing 3                                                                                                                                                                             | Homo sapiens |
| 5612      | protein-kinase, interferon-inducible double stranded RNA dependent inhibitor, repressor of (P58 repressor)                                                                                            | Homo sapiens |
| 55011     | PIH1 domain containing 1                                                                                                                                                                              | Homo sapiens |
| 51808     | phosphorylated adaptor for RNA export                                                                                                                                                                 | Homo sapiens |
| 25885     | polymerase (RNA) I polypeptide A, 194kDa                                                                                                                                                              | Homo sapiens |
| 6595      | SWI/SNF related, matrix associated, actin dependent regulator of chromatin, subfamily a, member 2                                                                                                     | Homo sapiens |
| 283358    | beta-1,4-N-acetyl-galactosaminyl transferase 3                                                                                                                                                        | Homo sapiens |

|           |                                                                                                          |              |
|-----------|----------------------------------------------------------------------------------------------------------|--------------|
| 54534     | mitochondrial ribosomal protein L50                                                                      | Homo sapiens |
| 1478      | cleavage stimulation factor, 3' pre-RNA, subunit 2, 64kDa                                                | Homo sapiens |
| 9746      | calsyntenin 3                                                                                            | Homo sapiens |
| 7555      | CCHC-type zinc finger, nucleic acid binding protein                                                      | Homo sapiens |
| 644131    | similar to chaperonin containing TCP1, subunit 8 (theta); chaperonin containing TCP1, subunit 8 (theta)  | Homo sapiens |
| 5099      | protocadherin 7                                                                                          | Homo sapiens |
| 84916     | cirrhosis, autosomal recessive 1A (cirhin)                                                               | Homo sapiens |
| 83956     | Rac GTPase activating protein 1 pseudogene; Rac GTPase activating protein 1                              | Homo sapiens |
| 1838      | dystrobrevin, beta                                                                                       | Homo sapiens |
| 6827      | suppressor of Ty 4 homolog 1 ( <i>S. cerevisiae</i> )                                                    | Homo sapiens |
| 100133770 | hypothetical protein LOC100133770; vacuolar protein sorting 35 homolog ( <i>S. cerevisiae</i> )          | Homo sapiens |
| 9683      | NEDD4 binding protein 1                                                                                  | Homo sapiens |
| 157       | adrenergic, beta, receptor kinase 2                                                                      | Homo sapiens |
| 100293737 | similar to protein phosphatase 1 regulatory subunit 14B                                                  | Homo sapiens |
| 9882      | TBC1 domain family, member 4                                                                             | Homo sapiens |
| 728860    | karyopherin alpha 2 (RAG cohort 1, importin alpha 1); karyopherin alpha-2 subunit like                   | Homo sapiens |
| 119358    | small nuclear ribonucleoprotein D2 polypeptide 16.5kDa; similar to hCG2040270                            | Homo sapiens |
| 148113    | cartilage intermediate layer protein 2                                                                   | Homo sapiens |
| 79657     | RNA polymerase II associated protein 3                                                                   | Homo sapiens |
| 8458      | transcription termination factor, RNA polymerase II                                                      | Homo sapiens |
| 93323     | HAUS augmin-like complex, subunit 8                                                                      | Homo sapiens |
| 55179     | Fas apoptotic inhibitory molecule                                                                        | Homo sapiens |
| 3832      | kinesin family member 11                                                                                 | Homo sapiens |
| 892       | cyclin C                                                                                                 | Homo sapiens |
| 55818     | lysine (K)-specific demethylase 3A                                                                       | Homo sapiens |
| 80018     | chromosome 12 open reading frame 30                                                                      | Homo sapiens |
| 11319     | ecdysoneless homolog ( <i>Drosophila</i> )                                                               | Homo sapiens |
| 79018     | chromosome 17 open reading frame 39                                                                      | Homo sapiens |
| 9423      | netrin 1                                                                                                 | Homo sapiens |
| 10885     | WD repeat domain 3                                                                                       | Homo sapiens |
| 23130     | ATG2 autophagy related 2 homolog A ( <i>S. cerevisiae</i> )                                              | Homo sapiens |
| 10570     | dihydropyrimidinase-like 4                                                                               | Homo sapiens |
| 4745      | NEL-like 1 (chicken)                                                                                     | Homo sapiens |
| 55164     | SHQ1 homolog ( <i>S. cerevisiae</i> )                                                                    | Homo sapiens |
| 90293     | kelch-like 13 ( <i>Drosophila</i> )                                                                      | Homo sapiens |
| 642585    | voltage-dependent anion channel 1; similar to voltage-dependent anion channel 1                          | Homo sapiens |
| 90850     | zinc finger protein 598                                                                                  | Homo sapiens |
| 8148      | TAF15 RNA polymerase II, TATA box binding protein (TBP)-associated factor, 68kDa                         | Homo sapiens |
| 2962      | general transcription factor IIF, polypeptide 1, 74kDa                                                   | Homo sapiens |
| 11011     | tousled-like kinase 2                                                                                    | Homo sapiens |
| 79003     | MIS12, MIND kinetochore complex component, homolog ( <i>S. pombe</i> )                                   | Homo sapiens |
| 51164     | dynactin 4 (p62)                                                                                         | Homo sapiens |
| 91039     | dipeptidyl-peptidase 9                                                                                   | Homo sapiens |
| 57099     | apoptosis, caspase activation inhibitor                                                                  | Homo sapiens |
| 1982      | eukaryotic translation initiation factor 4 gamma, 2                                                      | Homo sapiens |
| 645630    | ribosomal protein S13 pseudogene 8; ribosomal protein S13; ribosomal protein S13 pseudogene 2            | Homo sapiens |
| 729236    | ribosomal protein S13 pseudogene 8; ribosomal protein S13; ribosomal protein S13 pseudogene 2            | Homo sapiens |
| 122830    | N-acetyltransferase 12 (GCN5-related, putative)                                                          | Homo sapiens |
| 28998     | mitochondrial ribosomal protein L13                                                                      | Homo sapiens |
| 55726     | chromosome 12 open reading frame 11                                                                      | Homo sapiens |
| 9648      | GRIP and coiled-coil domain containing 2                                                                 | Homo sapiens |
| 8120      | adaptor-related protein complex 3, beta 2 subunit                                                        | Homo sapiens |
| 124997    | WD repeat domain 81                                                                                      | Homo sapiens |
| 100134387 | similar to DEAH (Asp-Glu-Ala-His) box polypeptide 40; DEAH (Asp-Glu-Ala-His) box polypeptide 40          | Homo sapiens |
| 79665     | similar to DEAH (Asp-Glu-Ala-His) box polypeptide 40; DEAH (Asp-Glu-Ala-His) box polypeptide 40          | Homo sapiens |
| 79042     | tRNA splicing endonuclease 34 homolog ( <i>S. cerevisiae</i> )                                           | Homo sapiens |
| 54939     | COMM domain containing 4                                                                                 | Homo sapiens |
| 79047     | potassium channel tetramerisation domain containing 15                                                   | Homo sapiens |
| 9874      | tousled-like kinase 1                                                                                    | Homo sapiens |
| 389677    | RNA binding motif protein 12B                                                                            | Homo sapiens |
| 79109     | mitogen-activated protein kinase associated protein 1                                                    | Homo sapiens |
| 9530      | BCL2-associated athanogene 4                                                                             | Homo sapiens |
| 23085     | ELKS/RAB6-interacting/CAST family member 1                                                               | Homo sapiens |
| 374291    | NADH dehydrogenase (ubiquinone) Fe-S protein 7, 20kDa (NADH-coenzyme Q reductase)                        | Homo sapiens |
| 55114     | Rho GTPase activating protein 17                                                                         | Homo sapiens |
| 650405    | similar to hCG26659; immunoglobulin kappa constant; similar to Ig kappa chain V-I region HK102 precursor | Homo sapiens |
| 652493    | similar to hCG26659; immunoglobulin kappa constant; similar to Ig kappa chain V-I region HK102 precursor | Homo sapiens |

|           |                                                                                                                                                                                                                      |              |
|-----------|----------------------------------------------------------------------------------------------------------------------------------------------------------------------------------------------------------------------|--------------|
| 10978     | CLP1, cleavage and polyadenylation factor I subunit, homolog ( <i>S. cerevisiae</i> )                                                                                                                                | Homo sapiens |
| 51663     | zinc finger RNA binding protein                                                                                                                                                                                      | Homo sapiens |
| 79596     | ring finger protein 219                                                                                                                                                                                              | Homo sapiens |
| 79670     | zinc finger, CCHC domain containing 6                                                                                                                                                                                | Homo sapiens |
| 23114     | neurofascin homolog (chicken)                                                                                                                                                                                        | Homo sapiens |
| 140459    | ankyrin repeat and SOCS box-containing 6                                                                                                                                                                             | Homo sapiens |
| 5433      | polymerase (RNA) II (DNA directed) polypeptide D                                                                                                                                                                     | Homo sapiens |
| 50717     | WD repeat domain 42A                                                                                                                                                                                                 | Homo sapiens |
| 10523     | calcium homeostasis endoplasmic reticulum protein                                                                                                                                                                    | Homo sapiens |
| 51256     | TBC1 domain family, member 7                                                                                                                                                                                         | Homo sapiens |
| 646819    | ribosomal protein S15a pseudogene 17; ribosomal protein S15a pseudogene 19; ribosomal protein S15a pseudogene 12; ribosomal protein S15a pseudogene 24; ribosomal protein S15a pseudogene 11; ribosomal protein S15a | Homo sapiens |
| 644790    | ribosomal protein S15a pseudogene 17; ribosomal protein S15a pseudogene 19; ribosomal protein S15a pseudogene 12; ribosomal protein S15a pseudogene 24; ribosomal protein S15a pseudogene 11; ribosomal protein S15a | Homo sapiens |
| 648729    | ribosomal protein S15a pseudogene 17; ribosomal protein S15a pseudogene 19; ribosomal protein S15a pseudogene 12; ribosomal protein S15a pseudogene 24; ribosomal protein S15a pseudogene 11; ribosomal protein S15a | Homo sapiens |
| 391656    | ribosomal protein S15a pseudogene 17; ribosomal protein S15a pseudogene 19; ribosomal protein S15a pseudogene 12; ribosomal protein S15a pseudogene 24; ribosomal protein S15a pseudogene 11; ribosomal protein S15a | Homo sapiens |
| 100129243 | ribosomal protein S15a pseudogene 17; ribosomal protein S15a pseudogene 19; ribosomal protein S15a pseudogene 12; ribosomal protein S15a pseudogene 24; ribosomal protein S15a pseudogene 11; ribosomal protein S15a | Homo sapiens |
| 6249      | CAP-GLY domain containing linker protein 1                                                                                                                                                                           | Homo sapiens |
| 9551      | ATP synthase, H <sup>+</sup> transporting, mitochondrial F0 complex, subunit F2                                                                                                                                      | Homo sapiens |
| 160428    | aldehyde dehydrogenase 1 family, member L2                                                                                                                                                                           | Homo sapiens |
| 6788      | serine/threonine kinase 3 (STE20 homolog, yeast)                                                                                                                                                                     | Homo sapiens |
| 130507    | ubiquitin protein ligase E3 component n-recogin 3 (putative)                                                                                                                                                         | Homo sapiens |
| 253635    | coiled-coil domain containing 75                                                                                                                                                                                     | Homo sapiens |
| 83955     | nascent-polypeptide-associated complex alpha polypeptide pseudogene 1                                                                                                                                                | Homo sapiens |
| 1287      | collagen, type IV, alpha 5                                                                                                                                                                                           | Homo sapiens |
| 9055      | protein regulator of cytokinesis 1                                                                                                                                                                                   | Homo sapiens |
| 51586     | mediator complex subunit 15                                                                                                                                                                                          | Homo sapiens |
| 9440      | mediator complex subunit 17                                                                                                                                                                                          | Homo sapiens |
| 54517     | pseudouridylate synthase 7 homolog ( <i>S. cerevisiae</i> )                                                                                                                                                          | Homo sapiens |
| 51388     | nuclear import 7 homolog ( <i>S. cerevisiae</i> )                                                                                                                                                                    | Homo sapiens |
| 22920     | kinesin-associated protein 3                                                                                                                                                                                         | Homo sapiens |
| 5830      | peroxisomal biogenesis factor 5                                                                                                                                                                                      | Homo sapiens |
| 55636     | chromodomain helicase DNA binding protein 7                                                                                                                                                                          | Homo sapiens |
| 9801      | mitochondrial ribosomal protein L19                                                                                                                                                                                  | Homo sapiens |
| 100133898 | anaphase promoting complex subunit 1; similar to anaphase promoting complex subunit 1                                                                                                                                | Homo sapiens |
| 100133982 | anaphase promoting complex subunit 1; similar to anaphase promoting complex subunit 1                                                                                                                                | Homo sapiens |
| 57728     | WD repeat domain 19                                                                                                                                                                                                  | Homo sapiens |
| 643668    | proteasome (prosome, macropain) 26S subunit, ATPase, 1; similar to protease (prosome, macropain) 26S subunit, ATPase 1                                                                                               | Homo sapiens |
| 6046      | bromodomain containing 2                                                                                                                                                                                             | Homo sapiens |
| 83540     | NUF2, NDC80 kinetochore complex component, homolog ( <i>S. cerevisiae</i> )                                                                                                                                          | Homo sapiens |
| 23609     | makorin ring finger protein 2                                                                                                                                                                                        | Homo sapiens |
| 29959     | nuclear receptor binding protein 1                                                                                                                                                                                   | Homo sapiens |
| 653226    | signal recognition particle 9-like 1; signal recognition particle 9kDa                                                                                                                                               | Homo sapiens |
| 2803      | golgi autoantigen, golgin subfamily a, 4                                                                                                                                                                             | Homo sapiens |
| 51184     | GPN-loop GTPase 3                                                                                                                                                                                                    | Homo sapiens |
| 112970    | KTI12 homolog, chromatin associated ( <i>S. cerevisiae</i> )                                                                                                                                                         | Homo sapiens |
| 3988      | lipase A, lysosomal acid, cholesterol esterase                                                                                                                                                                       | Homo sapiens |
| 219743    | trypsin domain containing 1                                                                                                                                                                                          | Homo sapiens |
| 59277     | netrin 4                                                                                                                                                                                                             | Homo sapiens |
| 57570     | TRM5 tRNA methyltransferase 5 homolog ( <i>S. cerevisiae</i> )                                                                                                                                                       | Homo sapiens |
| 25853     | WD repeat domain 40A                                                                                                                                                                                                 | Homo sapiens |
| 7059      | thrombospondin 3                                                                                                                                                                                                     | Homo sapiens |
| 58986     | transmembrane protein 8A                                                                                                                                                                                             | Homo sapiens |
| 85441     | peroxisomal proliferator-activated receptor A interacting complex 285                                                                                                                                                | Homo sapiens |
| 10724     | meningioma expressed antigen 5 (hyaluronidase)                                                                                                                                                                       | Homo sapiens |
| 692312    | PPAN-P2RY11 readthrough transcript                                                                                                                                                                                   | Homo sapiens |
| 51517     | NCK interacting protein with SH3 domain                                                                                                                                                                              | Homo sapiens |
| 3550      | similar to CG18005; IK cytokine, down-regulator of HLA II                                                                                                                                                            | Homo sapiens |
| 644456    | similar to CG18005; IK cytokine, down-regulator of HLA II                                                                                                                                                            | Homo sapiens |
| 84321     | similar to THO complex 3; THO complex 3                                                                                                                                                                              | Homo sapiens |
| 728554    | similar to THO complex 3; THO complex 3                                                                                                                                                                              | Homo sapiens |
| 4928      | nucleoporin 98kDa                                                                                                                                                                                                    | Homo sapiens |
| 6609      | sphingomyelin phosphodiesterase 1, acid lysosomal                                                                                                                                                                    | Homo sapiens |
| 151162    | mannosyl (alpha-1,6)-glycoprotein beta-1,6-N-acetyl-glucosaminyltransferase; hypothetical LOC151162                                                                                                                  | Homo sapiens |
| 26292     | c-myc binding protein                                                                                                                                                                                                | Homo sapiens |
| 51773     | remodeling and spacing factor 1                                                                                                                                                                                      | Homo sapiens |
| 56006     | chromosome 19 open reading frame 61                                                                                                                                                                                  | Homo sapiens |
| 9500      | melanoma antigen family D, 1                                                                                                                                                                                         | Homo sapiens |

|           |                                                                                                                                                             |              |
|-----------|-------------------------------------------------------------------------------------------------------------------------------------------------------------|--------------|
| 9631      | nucleoporin 155kDa                                                                                                                                          | Homo sapiens |
| 284403    | WD repeat domain 62                                                                                                                                         | Homo sapiens |
| 10243     | gephyrin                                                                                                                                                    | Homo sapiens |
| 55827     | IQ motif and WD repeats 1                                                                                                                                   | Homo sapiens |
| 79829     | N-acetyltransferase 11 (GCN5-related, putative)                                                                                                             | Homo sapiens |
| 5886      | RAD23 homolog A ( <i>S. cerevisiae</i> )                                                                                                                    | Homo sapiens |
| 23587     | chromosome 17 open reading frame 81                                                                                                                         | Homo sapiens |
| 94104     | chromosome 21 open reading frame 66                                                                                                                         | Homo sapiens |
| 114880    | oxysterol binding protein-like 6                                                                                                                            | Homo sapiens |
| 51605     | tRNA methyltransferase 6 homolog ( <i>S. cerevisiae</i> )                                                                                                   | Homo sapiens |
| 223117    | sema domain, immunoglobulin domain (Ig), short basic domain, secreted, (semaphorin) 3D                                                                      | Homo sapiens |
| 55212     | Bardet-Biedl syndrome 7                                                                                                                                     | Homo sapiens |
| 8409      | ubiquitously-expressed transcript                                                                                                                           | Homo sapiens |
| 2647      | biogenesis of lysosomal organelles complex-1, subunit 1                                                                                                     | Homo sapiens |
| 80274     | signal peptide, CUB domain, EGF-like 1                                                                                                                      | Homo sapiens |
| 79989     | tetratricopeptide repeat domain 26                                                                                                                          | Homo sapiens |
| 51122     | COMM domain containing 2                                                                                                                                    | Homo sapiens |
| 1643      | damage-specific DNA binding protein 2, 48kDa                                                                                                                | Homo sapiens |
| 8725      | chromosome 19 open reading frame 2                                                                                                                          | Homo sapiens |
| 60682     | small ArfGAP 1                                                                                                                                              | Homo sapiens |
| 9212      | aurora kinase B                                                                                                                                             | Homo sapiens |
| 56339     | methyltransferase like 3                                                                                                                                    | Homo sapiens |
| 8266      | ubiquitin-like 4A                                                                                                                                           | Homo sapiens |
| 100131196 | ribosomal protein S25 pseudogene 8; ribosomal protein S25                                                                                                   | Homo sapiens |
| 55658     | ring finger protein 126                                                                                                                                     | Homo sapiens |
| 51260     | chromosome X open reading frame 26                                                                                                                          | Homo sapiens |
| 728953    | ribosomal protein S19 pseudogene 3; ribosomal protein S19                                                                                                   | Homo sapiens |
| 26031     | oxysterol binding protein-like 3                                                                                                                            | Homo sapiens |
| 56342     | peter pan homolog ( <i>Drosophila</i> )                                                                                                                     | Homo sapiens |
| 220134    | chromosome 18 open reading frame 24                                                                                                                         | Homo sapiens |
| 9855      | FERM, RhoGEF and pleckstrin domain protein 2                                                                                                                | Homo sapiens |
| 29099     | COMM domain containing 9                                                                                                                                    | Homo sapiens |
| 27075     | tetraspanin 13                                                                                                                                              | Homo sapiens |
| 26035     | glucuronic acid epimerase                                                                                                                                   | Homo sapiens |
| 8315      | BRCA1 associated protein                                                                                                                                    | Homo sapiens |
| 129831    | RNA binding motif protein 45                                                                                                                                | Homo sapiens |
| 288       | ankyrin 3, node of Ranvier (ankyrin G)                                                                                                                      | Homo sapiens |
| 2508      | ferritin, heavy polypeptide 1; ferritin, heavy polypeptide-like 16; similar to ferritin, heavy polypeptide 1; ferritin, heavy polypeptide-like 3 pseudogene | Homo sapiens |
| 2498      | ferritin, heavy polypeptide 1; ferritin, heavy polypeptide-like 16; similar to ferritin, heavy polypeptide 1; ferritin, heavy polypeptide-like 3 pseudogene | Homo sapiens |
| 729009    | ferritin, heavy polypeptide 1; ferritin, heavy polypeptide-like 16; similar to ferritin, heavy polypeptide 1; ferritin, heavy polypeptide-like 3 pseudogene | Homo sapiens |
| 115752    | DIS3 mitotic control homolog ( <i>S. cerevisiae</i> )-like                                                                                                  | Homo sapiens |
| 2130      | similar to Ewing sarcoma breakpoint region 1; Ewing sarcoma breakpoint region 1                                                                             | Homo sapiens |
| 284685    | similar to Ewing sarcoma breakpoint region 1; Ewing sarcoma breakpoint region 1                                                                             | Homo sapiens |
| 286826    | lin-9 homolog ( <i>C. elegans</i> )                                                                                                                         | Homo sapiens |
| 7024      | transcription factor CP2                                                                                                                                    | Homo sapiens |
| 90480     | growth arrest and DNA-damage-inducible, gamma interacting protein 1                                                                                         | Homo sapiens |
