# Supplementary material for: Identification and Characterization of 293T Cell-Derived Exosomes by Profiling the Protein, mRNA and MicroRNA Components
Source: PubMed Central journal article supplement (PMC5029934; doi:10.1371/journal.pone.0163043), 2016-09-20
Supplement: pone.0163043.s005.pdf [file pone.0163043.s005.pdf]

| ENTREZ_GENE_ID | Name                                                                                                                                                            | Species      |
|----------------|-----------------------------------------------------------------------------------------------------------------------------------------------------------------|--------------|
| 26057          | ankyrin repeat domain 17                                                                                                                                        | Homo sapiens |
| 29914          | UbiA prenyltransferase domain containing 1                                                                                                                      | Homo sapiens |
| 10845          | ClpX caseinolytic peptidase X homolog (E. coli)                                                                                                                 | Homo sapiens |
| 84942          | WD repeat domain 73                                                                                                                                             | Homo sapiens |
| 10081          | programmed cell death 7                                                                                                                                         | Homo sapiens |
| 145389         | solute carrier family 38, member 6                                                                                                                              | Homo sapiens |
| 79892          | chromosome 10 open reading frame 119                                                                                                                            | Homo sapiens |
| 200894         | ADP-ribosylation factor-like 13B                                                                                                                                | Homo sapiens |
| 64895          | poly(A) polymerase gamma                                                                                                                                        | Homo sapiens |
| 23394          | activity-dependent neuroprotector homeobox                                                                                                                      | Homo sapiens |
| 9282           | mediator complex subunit 14                                                                                                                                     | Homo sapiens |
| 5394           | exosome component 10                                                                                                                                            | Homo sapiens |
| 55252          | additional sex combs like 2 (Drosophila)                                                                                                                        | Homo sapiens |
| 100            | adenosine deaminase                                                                                                                                             | Homo sapiens |
| 317749         | dehydrogenase/reductase (SDR family) member 4 like 2                                                                                                            | Homo sapiens |
| 9778           | KIAA0232                                                                                                                                                        | Homo sapiens |
| 29094          | galectin-related protein                                                                                                                                        | Homo sapiens |
| 340542         | brain expressed, X-linked 5                                                                                                                                     | Homo sapiens |
| 54776          | protein phosphatase 1, regulatory (inhibitor) subunit 12C                                                                                                       | Homo sapiens |
| 9570           | golgi SNAP receptor complex member 2                                                                                                                            | Homo sapiens |
| 79854          | non-protein coding RNA 115                                                                                                                                      | Homo sapiens |
| 26093          | coiled-coil domain containing 9                                                                                                                                 | Homo sapiens |
| 128866         | chromatin modifying protein 4B                                                                                                                                  | Homo sapiens |
| 90121          | TSR2, 20S rRNA accumulation, homolog (S. cerevisiae)                                                                                                            | Homo sapiens |
| 64215          | DnaJ (Hsp40) homolog, subfamily C, member 1                                                                                                                     | Homo sapiens |
| 55151          | transmembrane protein 38B                                                                                                                                       | Homo sapiens |
| 2734           | golgi apparatus protein 1                                                                                                                                       | Homo sapiens |
| 55012          | protein phosphatase 2 (formerly 2A), regulatory subunit B'', gamma                                                                                              | Homo sapiens |
| 440295         | similar to golgi autoantigen, golgin subfamily a-like; hypothetical protein LOC440295; hypothetical LOC642346; golgin subfamily A member 6-like protein 10-like | Homo sapiens |
| 79590          | mitochondrial ribosomal protein L24                                                                                                                             | Homo sapiens |
| 5165           | pyruvate dehydrogenase kinase, isozyme 3                                                                                                                        | Homo sapiens |
| 10529          | nebullette                                                                                                                                                      | Homo sapiens |
| 388            | ras homolog gene family, member B                                                                                                                               | Homo sapiens |
| 286144         | chromosome 8 open reading frame 83                                                                                                                              | Homo sapiens |
| 100302285      | microRNA 1244                                                                                                                                                   | Homo sapiens |
| 254225         | ring finger protein 169                                                                                                                                         | Homo sapiens |
| 80853          | jumonji C domain containing histone demethylase 1 homolog D (S. cerevisiae)                                                                                     | Homo sapiens |
| 84181          | chromodomain helicase DNA binding protein 6                                                                                                                     | Homo sapiens |
| 79720          | vacuolar protein sorting 37 homolog B (S. cerevisiae)                                                                                                           | Homo sapiens |
| 26065          | LSM14A, SCD6 homolog A (S. cerevisiae)                                                                                                                          | Homo sapiens |
| 10291          | splicing factor 3a, subunit 1, 120kDa                                                                                                                           | Homo sapiens |
| 55119          | PRP38 pre-mRNA processing factor 38 (yeast) domain containing B                                                                                                 | Homo sapiens |
| 154743         | chromosome 7 open reading frame 60                                                                                                                              | Homo sapiens |
| 375190         | chromosome 2 open reading frame 84; hypothetical protein LOC375190                                                                                              | Homo sapiens |
| 55327          | lin-7 homolog C (C. elegans)                                                                                                                                    | Homo sapiens |
| 23658          | LSM5 homolog, U6 small nuclear RNA associated (S. cerevisiae)                                                                                                   | Homo sapiens |
| 57185          | NIPA-like domain containing 3                                                                                                                                   | Homo sapiens |
| 27333          | golgi integral membrane protein 4                                                                                                                               | Homo sapiens |
| 8050           | pyruvate dehydrogenase complex, component X                                                                                                                     | Homo sapiens |
| 22836          | Rho-related BTB domain containing 3                                                                                                                             | Homo sapiens |
| 26286          | ADP-ribosylation factor GTPase activating protein 3                                                                                                             | Homo sapiens |
| 10936          | G protein-coupled receptor 75                                                                                                                                   | Homo sapiens |
| 2992           | glycogenin 1                                                                                                                                                    | Homo sapiens |
| 25980          | chromosome 20 open reading frame 4                                                                                                                              | Homo sapiens |
| 89958          | chromosome 9 open reading frame 140                                                                                                                             | Homo sapiens |
| 79823          | chromosome 2 open reading frame 34                                                                                                                              | Homo sapiens |
| 6936           | chromosome 2 open reading frame 3                                                                                                                               | Homo sapiens |
| 8867           | synaptojanin 1                                                                                                                                                  | Homo sapiens |
| 51031          | glyoxalase domain containing 4                                                                                                                                  | Homo sapiens |
| 57215          | THAP domain containing 11                                                                                                                                       | Homo sapiens |
| 10449          | hypothetical LOC648603; acetyl-Coenzyme A acyltransferase 2                                                                                                     | Homo sapiens |
| 55810          | forkhead box J2                                                                                                                                                 | Homo sapiens |
| 6940           | zinc finger protein 354A                                                                                                                                        | Homo sapiens |
| 9480           | one cut homeobox 2                                                                                                                                              | Homo sapiens |
| 26115          | tetratricopeptide repeat, ankyrin repeat and coiled-coil containing 2                                                                                           | Homo sapiens |
| 84282          | ring finger protein 135                                                                                                                                         | Homo sapiens |
| 50515          | carbohydrate (chondroitin 4) sulfotransferase 11                                                                                                                | Homo sapiens |
| 100133660      | hypothetical LOC100133660                                                                                                                                       | Homo sapiens |
| 3799           | kinesin family member 5B                                                                                                                                        | Homo sapiens |
| 55812          | spermatogenesis associated 7                                                                                                                                    | Homo sapiens |
| 5495           | protein phosphatase 1B (formerly 2C), magnesium-dependent, beta isoform                                                                                         | Homo sapiens |
| 9349           | ribosomal protein L23 pseudogene 6; ribosomal protein L23                                                                                                       | Homo sapiens |
| 26999          | cytoplasmic FMRI interacting protein 2                                                                                                                          | Homo sapiens |
| 440248         | hect domain and RLD 2 pseudogene                                                                                                                                | Homo sapiens |
| 10641          | tumor suppressor candidate 4                                                                                                                                    | Homo sapiens |

|           |                                                                                                                                                                                                                                                     |              |
|-----------|-----------------------------------------------------------------------------------------------------------------------------------------------------------------------------------------------------------------------------------------------------|--------------|
| 4898      | nardilysin (N-arginine dibasic convertase)                                                                                                                                                                                                          | Homo sapiens |
| 10905     | mannosidase, alpha, class 1A, member 2                                                                                                                                                                                                              | Homo sapiens |
| 84305     | within bgcn homolog (Drosophila)                                                                                                                                                                                                                    | Homo sapiens |
| 114785    | methyl-CpG binding domain protein 6                                                                                                                                                                                                                 | Homo sapiens |
| 9929      | Josephin domain containing 1                                                                                                                                                                                                                        | Homo sapiens |
| 169200    | transmembrane protein 64                                                                                                                                                                                                                            | Homo sapiens |
| 64151     | non-SMC condensin I complex, subunit G                                                                                                                                                                                                              | Homo sapiens |
| 10527     | importin 7                                                                                                                                                                                                                                          | Homo sapiens |
| 528       | ATPase, H <sup>+</sup> transporting, lysosomal 42kDa, V1 subunit C1                                                                                                                                                                                 | Homo sapiens |
| 79672     | fructosamine 3 kinase related protein                                                                                                                                                                                                               | Homo sapiens |
| 7752      | zinc finger protein 200                                                                                                                                                                                                                             | Homo sapiens |
| 9364      | RAB28, member RAS oncogene family                                                                                                                                                                                                                   | Homo sapiens |
| 6130      | ribosomal protein L7a pseudogene 70; ribosomal protein L7a; ribosomal protein L7a pseudogene 30; ribosomal protein L7a pseudogene 66; ribosomal protein L7a pseudogene 27; ribosomal protein L7a pseudogene 11; ribosomal protein L7a pseudogene 62 | Homo sapiens |
| 25939     | SAM domain and HD domain 1                                                                                                                                                                                                                          | Homo sapiens |
| 10635     | RAD51 associated protein 1                                                                                                                                                                                                                          | Homo sapiens |
| 100292863 | similar to erlectin                                                                                                                                                                                                                                 | Homo sapiens |
| 7353      | ubiquitin fusion degradation 1 like (yeast)                                                                                                                                                                                                         | Homo sapiens |
| 339448    | chromosome 1 open reading frame 174                                                                                                                                                                                                                 | Homo sapiens |
| 7528      | YY1 transcription factor                                                                                                                                                                                                                            | Homo sapiens |
| 5908      | RAP1B, member of RAS oncogene family                                                                                                                                                                                                                | Homo sapiens |
| 153396    | transmembrane protein 161B                                                                                                                                                                                                                          | Homo sapiens |
| 57602     | ubiquitin specific peptidase 36                                                                                                                                                                                                                     | Homo sapiens |
| 7392      | upstream transcription factor 2, c-fos interacting                                                                                                                                                                                                  | Homo sapiens |
| 57019     | cytokine induced apoptosis inhibitor 1; cytokine induced apoptosis inhibitor 1 pseudogene                                                                                                                                                           | Homo sapiens |
| 10197     | proteasome (prosome, macropain) activator subunit 3 (PA28 gamma; Ki)                                                                                                                                                                                | Homo sapiens |
| 79183     | tocopherol (alpha) transfer protein-like                                                                                                                                                                                                            | Homo sapiens |
| 201475    | RAB12, member RAS oncogene family                                                                                                                                                                                                                   | Homo sapiens |
| 55744     | chromosome 7 open reading frame 44                                                                                                                                                                                                                  | Homo sapiens |
| 7342      | upstream binding protein 1 (LBP-1a)                                                                                                                                                                                                                 | Homo sapiens |
| 11097     | nucleoporin like 2                                                                                                                                                                                                                                  | Homo sapiens |
| 401166    | FLJ44896 protein                                                                                                                                                                                                                                    | Homo sapiens |
| 7692      | zinc finger protein 133                                                                                                                                                                                                                             | Homo sapiens |
| 3915      | laminin, gamma 1 (formerly LAMB2)                                                                                                                                                                                                                   | Homo sapiens |
| 29107     | NTF2-like export factor 1                                                                                                                                                                                                                           | Homo sapiens |
| 6342      | sterol carrier protein 2                                                                                                                                                                                                                            | Homo sapiens |
| 56970     | ataxin 7-like 3                                                                                                                                                                                                                                     | Homo sapiens |
| 4899      | nuclear respiratory factor 1                                                                                                                                                                                                                        | Homo sapiens |
| 1152      | creatine kinase, brain                                                                                                                                                                                                                              | Homo sapiens |
| 7536      | splicing factor 1                                                                                                                                                                                                                                   | Homo sapiens |
| 118460    | exosome component 6                                                                                                                                                                                                                                 | Homo sapiens |
| 7919      | HLA-B associated transcript 1                                                                                                                                                                                                                       | Homo sapiens |
| 11127     | kinesin family member 3A                                                                                                                                                                                                                            | Homo sapiens |
| 51001     | MTERF domain containing 1                                                                                                                                                                                                                           | Homo sapiens |
| 100288152 | hypothetical protein LOC100288152                                                                                                                                                                                                                   | Homo sapiens |
| 90639     | COX19 cytochrome c oxidase assembly homolog (S. cerevisiae)                                                                                                                                                                                         | Homo sapiens |
| 11101     | arginyltransferase 1                                                                                                                                                                                                                                | Homo sapiens |
| 54948     | mitochondrial ribosomal protein L16                                                                                                                                                                                                                 | Homo sapiens |
| 5496      | protein phosphatase 1G (formerly 2C), magnesium-dependent, gamma isoform                                                                                                                                                                            | Homo sapiens |
| 79701     | chromosome 17 open reading frame 101                                                                                                                                                                                                                | Homo sapiens |
| 55105     | G patch domain containing 2                                                                                                                                                                                                                         | Homo sapiens |
| 55973     | B-cell receptor-associated protein 29                                                                                                                                                                                                               | Homo sapiens |
| 284098    | phosphatidylinositol glycan anchor biosynthesis, class W                                                                                                                                                                                            | Homo sapiens |
| 2733      | GLE1 RNA export mediator homolog (yeast)                                                                                                                                                                                                            | Homo sapiens |
| 55181     | chromosome 17 open reading frame 71                                                                                                                                                                                                                 | Homo sapiens |
| 10672     | guanine nucleotide binding protein (G protein), alpha 13                                                                                                                                                                                            | Homo sapiens |
| 84964     | alkB, alkylation repair homolog 6 (E. coli)                                                                                                                                                                                                         | Homo sapiens |
| 57291     | KIAA0114                                                                                                                                                                                                                                            | Homo sapiens |
| 7095      | SEC62 homolog (S. cerevisiae)                                                                                                                                                                                                                       | Homo sapiens |
| 1195      | CDC-like kinase 1                                                                                                                                                                                                                                   | Homo sapiens |
| 29883     | CCR4-NOT transcription complex, subunit 7                                                                                                                                                                                                           | Homo sapiens |
| 25996     | REX2, RNA exonuclease 2 homolog (S. cerevisiae)                                                                                                                                                                                                     | Homo sapiens |
| 23210     | jumonji domain containing 6                                                                                                                                                                                                                         | Homo sapiens |
| 53335     | B-cell CLL/lymphoma 11A (zinc finger protein)                                                                                                                                                                                                       | Homo sapiens |
| 7748      | zinc finger protein 195                                                                                                                                                                                                                             | Homo sapiens |
| 831       | calpastatin                                                                                                                                                                                                                                         | Homo sapiens |
| 23381     | Smg-5 homolog, nonsense mediated mRNA decay factor (C. elegans)                                                                                                                                                                                     | Homo sapiens |
| 115123    | membrane-associated ring finger (C3HC4) 3                                                                                                                                                                                                           | Homo sapiens |
| 5096      | propionyl Coenzyme A carboxylase, beta polypeptide                                                                                                                                                                                                  | Homo sapiens |
| 26073     | polymerase (DNA-directed), delta interacting protein 2                                                                                                                                                                                              | Homo sapiens |
| 129401    | nucleoporin 35kDa                                                                                                                                                                                                                                   | Homo sapiens |
| 6650      | small optic lobes homolog (Drosophila)                                                                                                                                                                                                              | Homo sapiens |
| 84844     | PHD finger protein 5A                                                                                                                                                                                                                               | Homo sapiens |
| 148223    | chromosome 19 open reading frame 25                                                                                                                                                                                                                 | Homo sapiens |
| 1911      | polyhomeotic homolog 1B (Drosophila); polyhomeotic homolog 1 (Drosophila)                                                                                                                                                                           | Homo sapiens |

|        |                                                                                             |              |
|--------|---------------------------------------------------------------------------------------------|--------------|
| 65056  | GC-rich promoter binding protein 1                                                          | Homo sapiens |
| 54545  | myotubularin related protein 12                                                             | Homo sapiens |
| 55898  | unc-45 homolog A ( <i>C. elegans</i> )                                                      | Homo sapiens |
| 26260  | F-box protein 25                                                                            | Homo sapiens |
| 8760   | CDP-diacylglycerol synthase (phosphatidate cytidylyltransferase) 2                          | Homo sapiens |
| 3212   | homeobox B2                                                                                 | Homo sapiens |
| 9441   | mediator complex subunit 26                                                                 | Homo sapiens |
| 9371   | kinesin family member 3B                                                                    | Homo sapiens |
| 54840  | aprataxin                                                                                   | Homo sapiens |
| 7750   | zinc finger, MYM-type 2                                                                     | Homo sapiens |
| 51657  | serine/threonine/tyrosine interacting-like 1                                                | Homo sapiens |
| 10274  | stromal antigen 1                                                                           | Homo sapiens |
| 137492 | vacuolar protein sorting 37 homolog A ( <i>S. cerevisiae</i> )                              | Homo sapiens |
| 153579 | butyrophilin-like 9                                                                         | Homo sapiens |
| 4149   | MYC associated factor X                                                                     | Homo sapiens |
| 8813   | dolichyl-phosphate mannosyltransferase polypeptide 1, catalytic subunit                     | Homo sapiens |
| 57482  | KIAA1211                                                                                    | Homo sapiens |
| 2020   | engrailed homeobox 2                                                                        | Homo sapiens |
| 90933  | tripartite motif-containing 41                                                              | Homo sapiens |
| 22903  | BTB (POZ) domain containing 3                                                               | Homo sapiens |
| 374986 | family with sequence similarity 73, member A                                                | Homo sapiens |
| 5001   | origin recognition complex, subunit 5-like (yeast)                                          | Homo sapiens |
| 706    | translocator protein (18kDa)                                                                | Homo sapiens |
| 84307  | zinc finger protein 397                                                                     | Homo sapiens |
| 1124   | chimerin (chimaerin) 2                                                                      | Homo sapiens |
| 6897   | threonyl-tRNA synthetase                                                                    | Homo sapiens |
| 142678 | mindbomb homolog 2 ( <i>Drosophila</i> )                                                    | Homo sapiens |
| 51422  | protein kinase, AMP-activated, gamma 2 non-catalytic subunit                                | Homo sapiens |
| 51095  | tRNA nucleotidyl transferase, CCA-adding, 1                                                 | Homo sapiens |
| 54471  | Smith-Magenis syndrome chromosome region, candidate 7-like                                  | Homo sapiens |
| 613037 | nuclear pore complex interacting protein pseudogene                                         | Homo sapiens |
| 348995 | nucleoporin 43kDa                                                                           | Homo sapiens |
| 55177  | family with sequence similarity 82, member A2                                               | Homo sapiens |
| 192683 | secretory carrier membrane protein 5                                                        | Homo sapiens |
| 84284  | chromosome 1 open reading frame 57                                                          | Homo sapiens |
| 203427 | solute carrier family 25, member 43                                                         | Homo sapiens |
| 26960  | neurobeachin                                                                                | Homo sapiens |
| 81563  | chromosome 1 open reading frame 21                                                          | Homo sapiens |
| 7923   | hydroxysteroid (17-beta) dehydrogenase 8                                                    | Homo sapiens |
| 54470  | similar to armadillo repeat containing, X-linked 6; armadillo repeat containing, X-linked 6 | Homo sapiens |
| 9819   | TSC22 domain family, member 2                                                               | Homo sapiens |
| 10907  | thioredoxin-like 4A                                                                         | Homo sapiens |
| 5903   | RAN binding protein 2                                                                       | Homo sapiens |
| 23560  | GTP binding protein 4                                                                       | Homo sapiens |
| 3043   | hemoglobin, beta                                                                            | Homo sapiens |
| 23376  | KIAA0776                                                                                    | Homo sapiens |
| 1633   | deoxycytidine kinase                                                                        | Homo sapiens |
| 55780  | chromosome 6 open reading frame 70                                                          | Homo sapiens |
| 5937   | RNA binding motif, single stranded interacting protein 1                                    | Homo sapiens |
| 7343   | upstream binding transcription factor, RNA polymerase I                                     | Homo sapiens |
| 54431  | DnaJ (Hsp40) homolog, subfamily C, member 10                                                | Homo sapiens |
| 5223   | phosphoglycerate mutase 1 (brain)                                                           | Homo sapiens |
| 9520   | hypothetical protein FLJ11822; aminopeptidase puromycin sensitive                           | Homo sapiens |
| 25956  | SEC31 homolog B ( <i>S. cerevisiae</i> )                                                    | Homo sapiens |
| 57688  | zinc finger, SWIM-type containing 6                                                         | Homo sapiens |
| 9184   | budding uninhibited by benzimidazoles 3 homolog (yeast)                                     | Homo sapiens |
| 80264  | zinc finger protein 430                                                                     | Homo sapiens |
| 51805  | coenzyme Q3 homolog, methyltransferase ( <i>S. cerevisiae</i> )                             | Homo sapiens |
| 967    | CD63 molecule                                                                               | Homo sapiens |
| 126789 | pseudouridylate synthase-like 1                                                             | Homo sapiens |
| 8896   | BUD31 homolog ( <i>S. cerevisiae</i> )                                                      | Homo sapiens |
| 284184 | chromosome 17 open reading frame 89                                                         | Homo sapiens |
| 1540   | cyldromatosis (turban tumor syndrome)                                                       | Homo sapiens |
| 30851  | Tax1 (human T-cell leukemia virus type 1) binding protein 3                                 | Homo sapiens |
| 535    | ATPase, H <sup>+</sup> transporting, lysosomal V0 subunit a1                                | Homo sapiens |
| 10664  | CCCTC-binding factor (zinc finger protein)                                                  | Homo sapiens |
| 54205  | cytochrome c, somatic                                                                       | Homo sapiens |
| 7988   | zinc finger protein 212                                                                     | Homo sapiens |
| 57610  | RAN binding protein 10                                                                      | Homo sapiens |
| 51094  | adiponectin receptor 1                                                                      | Homo sapiens |
| 23475  | quinolinate phosphoribosyltransferase                                                       | Homo sapiens |
| 84967  | LSM10, U7 small nuclear RNA associated                                                      | Homo sapiens |
| 51440  | hippocalcin like 4                                                                          | Homo sapiens |
| 5527   | protein phosphatase 2, regulatory subunit B', gamma isoform                                 | Homo sapiens |
| 58485  | trafficking protein particle complex 1                                                      | Homo sapiens |
| 79680  | chromosome 22 open reading frame 29                                                         | Homo sapiens |

|           |                                                                                                                                                                                                                                                            |              |
|-----------|------------------------------------------------------------------------------------------------------------------------------------------------------------------------------------------------------------------------------------------------------------|--------------|
| 7013      | similar to telomeric repeat binding factor (NIMA-interacting) 1; telomeric repeat binding factor (NIMA-interacting) 1; telomeric repeat binding factor (NIMA-interacting) 1<br>pseudogene                                                                  | Homo sapiens |
| 388969    | chromosome 2 open reading frame 68                                                                                                                                                                                                                         | Homo sapiens |
| 7332      | ubiquitin-conjugating enzyme E2L 3                                                                                                                                                                                                                         | Homo sapiens |
| 83742     | hypothetical LOC100270710; MARVEL domain containing 1                                                                                                                                                                                                      | Homo sapiens |
| 133015    | PARK2 co-regulated-like                                                                                                                                                                                                                                    | Homo sapiens |
| 55625     | zinc finger, DHHC-type containing 7                                                                                                                                                                                                                        | Homo sapiens |
| 55773     | TBC1 domain family, member 23                                                                                                                                                                                                                              | Homo sapiens |
| 283209    | phosphoglucomutase 2-like 1                                                                                                                                                                                                                                | Homo sapiens |
| 26503     | solute carrier family 17 (anion/sugar transporter), member 5                                                                                                                                                                                               | Homo sapiens |
| 9703      | KIAA0100                                                                                                                                                                                                                                                   | Homo sapiens |
| 1979      | eukaryotic translation initiation factor 4E binding protein 2                                                                                                                                                                                              | Homo sapiens |
| 8777      | multiple PDZ domain protein                                                                                                                                                                                                                                | Homo sapiens |
| 148423    | chromosome 1 open reading frame 52                                                                                                                                                                                                                         | Homo sapiens |
| 100134361 | similar to hCG1811002                                                                                                                                                                                                                                      | Homo sapiens |
| 122769    | peptidylprolyl isomerase (cyclophilin)-like 5                                                                                                                                                                                                              | Homo sapiens |
| 9326      | zinc finger, HIT type 3                                                                                                                                                                                                                                    | Homo sapiens |
| 54971     | BTG3 associated nuclear protein                                                                                                                                                                                                                            | Homo sapiens |
| 66005     | chitinase domain containing 1                                                                                                                                                                                                                              | Homo sapiens |
| 6147      | ribosomal protein L23a pseudogene 63; ribosomal protein L23a pseudogene 75; ribosomal protein L23a pseudogene 37; ribosomal protein L23a pseudogene 65; ribosomal protein L23a pseudogene 43; ribosomal protein L23a pseudogene 44; ribosomal protein L23a | Homo sapiens |
| 26056     | RAB11 family interacting protein 5 (class I)                                                                                                                                                                                                               | Homo sapiens |
| 4116      | mago-nashi homolog, proliferation-associated (Drosophila)                                                                                                                                                                                                  | Homo sapiens |
| 117177    | RAB3A interacting protein (rabin3)                                                                                                                                                                                                                         | Homo sapiens |
| 152217    | hypothetical LOC152217                                                                                                                                                                                                                                     | Homo sapiens |
| 327       | N-acylaminoacyl-peptide hydrolase                                                                                                                                                                                                                          | Homo sapiens |
| 6594      | SWI/SNF related, matrix associated, actin dependent regulator of chromatin, subfamily a, member 1                                                                                                                                                          | Homo sapiens |
| 3843      | importin 5                                                                                                                                                                                                                                                 | Homo sapiens |
| 256586    | LysM, putative peptidoglycan-binding, domain containing 2                                                                                                                                                                                                  | Homo sapiens |
| 6533      | solute carrier family 6 (neurotransmitter transporter, taurine), member 6                                                                                                                                                                                  | Homo sapiens |
| 11160     | ER lipid raft associated 2                                                                                                                                                                                                                                 | Homo sapiens |
| 6651      | SON DNA binding protein                                                                                                                                                                                                                                    | Homo sapiens |
| 643253    | chaperonin containing TCP1, subunit 6 (zeta) pseudogene 1                                                                                                                                                                                                  | Homo sapiens |
| 23235     | salt-inducible kinase 2                                                                                                                                                                                                                                    | Homo sapiens |
| 144203    | ovostatin; ovostatin 2                                                                                                                                                                                                                                     | Homo sapiens |
| 7086      | transketolase                                                                                                                                                                                                                                              | Homo sapiens |
| 9797      | TatD DNase domain containing 2                                                                                                                                                                                                                             | Homo sapiens |
| 2631      | glioblastoma amplified sequence                                                                                                                                                                                                                            | Homo sapiens |
| 64897     | chromosome 12 open reading frame 43                                                                                                                                                                                                                        | Homo sapiens |
| 54149     | chromosome 21 open reading frame 91                                                                                                                                                                                                                        | Homo sapiens |
| 150590    | chromosome 2 open reading frame 15                                                                                                                                                                                                                         | Homo sapiens |
| 23287     | ATP/GTP binding protein 1                                                                                                                                                                                                                                  | Homo sapiens |
| 293       | solute carrier family 25 (mitochondrial carrier; adenine nucleotide translocator), member 6                                                                                                                                                                | Homo sapiens |
| 57575     | protocadherin 10                                                                                                                                                                                                                                           | Homo sapiens |
| 643155    | chromosome 5 open reading frame 43                                                                                                                                                                                                                         | Homo sapiens |
| 51125     | golgi autoantigen, golgin subfamily a, 7                                                                                                                                                                                                                   | Homo sapiens |
| 54187     | N-acetylneuraminic acid synthase                                                                                                                                                                                                                           | Homo sapiens |
| 8888      | minichromosome maintenance complex component 3 associated protein                                                                                                                                                                                          | Homo sapiens |
| 27330     | ribosomal protein S6 kinase, 90kDa, polypeptide 6                                                                                                                                                                                                          | Homo sapiens |
| 81539     | solute carrier family 38, member 1                                                                                                                                                                                                                         | Homo sapiens |
| 9117      | SEC22 vesicle trafficking protein homolog C (S. cerevisiae)                                                                                                                                                                                                | Homo sapiens |
| 84789     | hypothetical protein MGC2889                                                                                                                                                                                                                               | Homo sapiens |
| 83544     | dynein, axonemal, light chain 1                                                                                                                                                                                                                            | Homo sapiens |
| 26128     | KIAA1279                                                                                                                                                                                                                                                   | Homo sapiens |
| 11144     | DMC1 dosage suppressor of mck1 homolog, meiosis-specific homologous recombination (yeast)                                                                                                                                                                  | Homo sapiens |
| 50848     | F11 receptor                                                                                                                                                                                                                                               | Homo sapiens |
| 220988    | heterogeneous nuclear ribonucleoprotein A3                                                                                                                                                                                                                 | Homo sapiens |
| 25900     | intermediate filament family orphan 1                                                                                                                                                                                                                      | Homo sapiens |
| 140461    | ankyrin repeat and SOCS box-containing 8                                                                                                                                                                                                                   | Homo sapiens |
| 5311      | polycystic kidney disease 2 (autosomal dominant)                                                                                                                                                                                                           | Homo sapiens |
| 195827    | chromosome 9 open reading frame 21                                                                                                                                                                                                                         | Homo sapiens |
| 767811    | H2B histone family, member X, pseudogene                                                                                                                                                                                                                   | Homo sapiens |
| 121260    | solute carrier family 15, member 4                                                                                                                                                                                                                         | Homo sapiens |
| 51496     | CTD (carboxy-terminal domain, RNA polymerase II, polypeptide A) small phosphatase like 2                                                                                                                                                                   | Homo sapiens |
| 51389     | RWD domain containing 1-like 1; RWD domain containing 1                                                                                                                                                                                                    | Homo sapiens |
| 80346     | receptor accessory protein 4                                                                                                                                                                                                                               | Homo sapiens |
| 79469     | deleted in lymphocytic leukemia 2 (non-protein coding); deleted in lymphocytic leukemia 2-like                                                                                                                                                             | Homo sapiens |
| 8847      | deleted in lymphocytic leukemia 2 (non-protein coding); deleted in lymphocytic leukemia 2-like                                                                                                                                                             | Homo sapiens |
| 91801     | alkB, alkylation repair homolog 8 (E. coli)                                                                                                                                                                                                                | Homo sapiens |
| 400999    | hypothetical gene supported by AK124342                                                                                                                                                                                                                    | Homo sapiens |

|        |                                                                                                                                                                                             |              |
|--------|---------------------------------------------------------------------------------------------------------------------------------------------------------------------------------------------|--------------|
| 5464   | pyrophosphatase (inorganic) 1                                                                                                                                                               | Homo sapiens |
| 9732   | dedicator of cytokinesis 4                                                                                                                                                                  | Homo sapiens |
| 54995  | 3-oxoacyl-ACP synthase, mitochondrial                                                                                                                                                       | Homo sapiens |
| 92370  | acid phosphatase-like 2                                                                                                                                                                     | Homo sapiens |
| 253827 | methionine sulfoxide reductase B3                                                                                                                                                           | Homo sapiens |
| 84617  | tubulin, beta 6                                                                                                                                                                             | Homo sapiens |
| 23190  | UBX domain protein 4                                                                                                                                                                        | Homo sapiens |
| 6722   | serum response factor (c-fos serum response element-binding transcription factor)                                                                                                           | Homo sapiens |
| 7107   | G protein-coupled receptor 137B                                                                                                                                                             | Homo sapiens |
| 23588  | kelch domain containing 2                                                                                                                                                                   | Homo sapiens |
| 80308  | FAD1 flavin adenine dinucleotide synthetase homolog (S. cerevisiae)                                                                                                                         | Homo sapiens |
| 9658   | zinc finger protein 516                                                                                                                                                                     | Homo sapiens |
| 55610  | coiled-coil domain containing 132                                                                                                                                                           | Homo sapiens |
| 6135   | ribosomal protein L11                                                                                                                                                                       | Homo sapiens |
| 55278  | glutamyl-tRNA synthase (glutamine-hydrolyzing)-like 1                                                                                                                                       | Homo sapiens |
| 51193  | zinc finger protein 639                                                                                                                                                                     | Homo sapiens |
| 2081   | endoplasmic reticulum to nucleus signaling 1                                                                                                                                                | Homo sapiens |
| 10915  | transcription elongation regulator 1                                                                                                                                                        | Homo sapiens |
| 55135  | WD repeat containing, antisense to TP53                                                                                                                                                     | Homo sapiens |
| 51172  | N-acetylglucosamine-1-phosphodiester alpha-N-acetylglucosaminidase                                                                                                                          | Homo sapiens |
| 64784  | CREB regulated transcription coactivator 3                                                                                                                                                  | Homo sapiens |
| 26149  | zinc finger protein 658                                                                                                                                                                     | Homo sapiens |
| 138716 | chromosome 9 open reading frame 23                                                                                                                                                          | Homo sapiens |
| 5270   | serpin peptidase inhibitor, clade E (nexin, plasminogen activator inhibitor type 1), member 2                                                                                               | Homo sapiens |
| 51006  | solute carrier family 35, member C2                                                                                                                                                         | Homo sapiens |
| 493754 | RAB guanine nucleotide exchange factor (GEF) 1 pseudogene                                                                                                                                   | Homo sapiens |
| 92259  | mitochondrial ribosomal protein S36                                                                                                                                                         | Homo sapiens |
| 114932 | Morf4 family associated protein 1-like 1                                                                                                                                                    | Homo sapiens |
| 645460 | hypothetical LOC645460                                                                                                                                                                      | Homo sapiens |
| 64110  | melanoma antigen family F, 1                                                                                                                                                                | Homo sapiens |
| 7227   | trichorhinophalangeal syndrome I                                                                                                                                                            | Homo sapiens |
| 57082  | cancer susceptibility candidate 5                                                                                                                                                           | Homo sapiens |
| 23767  | fibronectin leucine rich transmembrane protein 3                                                                                                                                            | Homo sapiens |
| 9253   | numb homolog (Drosophila)-like                                                                                                                                                              | Homo sapiens |
| 55454  | chondroitin sulfate N-acetylgalactosaminyltransferase 2; novel protein similar to chondroitin sulfate GalNAcT-2 (GALNAcT-2)                                                                 | Homo sapiens |
| 23091  | zinc finger CCCH-type containing 13                                                                                                                                                         | Homo sapiens |
| 56650  | claudin domain containing 1                                                                                                                                                                 | Homo sapiens |
| 10399  | guanine nucleotide binding protein (G protein), beta polypeptide 2-like 1                                                                                                                   | Homo sapiens |
| 9639   | Rho guanine nucleotide exchange factor (GEF) 10                                                                                                                                             | Homo sapiens |
| 22843  | protein phosphatase 1E (PP2C domain containing)                                                                                                                                             | Homo sapiens |
| 5717   | proteasome (prosome, macropain) 26S subunit, non-ATPase, 11                                                                                                                                 | Homo sapiens |
| 23710  | GABA(A) receptors associated protein like 3 (pseudogene); GABA(A) receptor-associated protein like 1                                                                                        | Homo sapiens |
| 23766  | GABA(A) receptors associated protein like 3 (pseudogene); GABA(A) receptor-associated protein like 1                                                                                        | Homo sapiens |
| 54815  | GATA zinc finger domain containing 2A                                                                                                                                                       | Homo sapiens |
| 51124  | immediate early response 3 interacting protein 1                                                                                                                                            | Homo sapiens |
| 5782   | protein tyrosine phosphatase, non-receptor type 12                                                                                                                                          | Homo sapiens |
| 55869  | histone deacetylase 8                                                                                                                                                                       | Homo sapiens |
| 2122   | ecotropic viral integration site 1                                                                                                                                                          | Homo sapiens |
| 140890 | splicing factor, arginine/serine-rich 12                                                                                                                                                    | Homo sapiens |
| 55068  | ecto-NOX disulfide-thiol exchanger 1                                                                                                                                                        | Homo sapiens |
| 1727   | cytochrome b5 reductase 3                                                                                                                                                                   | Homo sapiens |
| 2653   | similar to Glycine cleavage system H protein, mitochondrial precursor; glycine cleavage system protein H (aminomethyl carrier); similar to Glycine cleavage system H protein, mitochondrial | Homo sapiens |
| 26275  | 3-hydroxyisobutyryl-Coenzyme A hydrolase                                                                                                                                                    | Homo sapiens |
| 405    | aryl hydrocarbon receptor nuclear translocator                                                                                                                                              | Homo sapiens |
| 9612   | nuclear receptor co-repressor 2                                                                                                                                                             | Homo sapiens |
| 10642  | insulin-like growth factor 2 mRNA binding protein 1                                                                                                                                         | Homo sapiens |
| 253260 | RPTOR independent companion of MTOR, complex 2                                                                                                                                              | Homo sapiens |
| 3312   | heat shock 70kDa protein 8                                                                                                                                                                  | Homo sapiens |
| 3417   | isocitrate dehydrogenase 1 (NADP+), soluble                                                                                                                                                 | Homo sapiens |
| 9352   | thioredoxin-like 1                                                                                                                                                                          | Homo sapiens |
| 6767   | similar to heat shock 70kD protein binding protein; suppression of tumorigenicity 13 (colon carcinoma) (Hsp70 interacting protein)                                                          | Homo sapiens |
| 4869   | nucleophosmin 1 (nucleolar phosphoprotein B23, numatrin) pseudogene 21; hypothetical LOC100131044; similar to nucleophosmin 1; nucleophosmin (nucleolar phosphoprotein B23, numatrin)       | Homo sapiens |
| 57634  | E1A binding protein p40                                                                                                                                                                     | Homo sapiens |
| 317762 | coiled-coil domain containing 85C                                                                                                                                                           | Homo sapiens |
| 79818  | zinc finger protein 552                                                                                                                                                                     | Homo sapiens |
| 5955   | reticulocalbin 2, EF-hand calcium binding domain                                                                                                                                            | Homo sapiens |
| 117583 | par-3 partitioning defective 3 homolog B (C. elegans)                                                                                                                                       | Homo sapiens |
| 51111  | suppressor of variegation 4-20 homolog 1 (Drosophila)                                                                                                                                       | Homo sapiens |

|        |                                                                                                                                                                          |              |
|--------|--------------------------------------------------------------------------------------------------------------------------------------------------------------------------|--------------|
| 23131  | G patch domain containing 8                                                                                                                                              | Homo sapiens |
| 6591   | snail homolog 2 (Drosophila)                                                                                                                                             | Homo sapiens |
| 84262  | proteasome (prosome, macropain) assembly chaperone 3                                                                                                                     | Homo sapiens |
| 93487  | mitogen-activated protein kinase 1 interacting protein 1-like                                                                                                            | Homo sapiens |
| 6159   | ribosomal protein L29 pseudogene 9; ribosomal protein L29 pseudogene 12; ribosomal protein L29 pseudogene 11; ribosomal protein L29; ribosomal protein L29 pseudogene 26 | Homo sapiens |
| 79583  | hypothetical protein FLJ22167                                                                                                                                            | Homo sapiens |
| 5357   | plastin 1 (I isoform)                                                                                                                                                    | Homo sapiens |
| 3764   | potassium inwardly-rectifying channel, subfamily J, member 8                                                                                                             | Homo sapiens |
| 79902  | nucleoporin 85kDa                                                                                                                                                        | Homo sapiens |
| 5681   | protein serine kinase H1                                                                                                                                                 | Homo sapiens |
| 1595   | cytochrome P450, family 51, subfamily A, polypeptide 1                                                                                                                   | Homo sapiens |
| 10440  | translocase of inner mitochondrial membrane 17 homolog A (yeast)                                                                                                         | Homo sapiens |
| 401152 | chromosome 4 open reading frame 3                                                                                                                                        | Homo sapiens |
| 79065  | ATG9 autophagy related 9 homolog A (S. cerevisiae)                                                                                                                       | Homo sapiens |
| 51304  | zinc finger, DHHC-type containing 3                                                                                                                                      | Homo sapiens |
| 10244  | Rab9 effector protein with kelch motifs                                                                                                                                  | Homo sapiens |
| 64841  | glucosamine-phosphate N-acetyltransferase 1                                                                                                                              | Homo sapiens |
| 196527 | anoctamin 6                                                                                                                                                              | Homo sapiens |
| 79676  | 2-oxoglutarate and iron-dependent oxygenase domain containing 2                                                                                                          | Homo sapiens |
| 55793  | family with sequence similarity 63, member A                                                                                                                             | Homo sapiens |
| 9690   | ubiquitin protein ligase E3C                                                                                                                                             | Homo sapiens |
| 51282  | SCAN domain containing 1                                                                                                                                                 | Homo sapiens |
| 65993  | mitochondrial ribosomal protein S34                                                                                                                                      | Homo sapiens |
| 1499   | catenin (cadherin-associated protein), beta 1, 88kDa                                                                                                                     | Homo sapiens |
| 131118 | similar to translocase of the inner mitochondrial membrane 14; DnaJ (Hsp40) homolog, subfamily C, member 19                                                              | Homo sapiens |
| 57186  | chromosome 20 open reading frame 74                                                                                                                                      | Homo sapiens |
| 10294  | DnaJ (Hsp40) homolog, subfamily A, member 2                                                                                                                              | Homo sapiens |
| 58528  | Ras-related GTP binding D                                                                                                                                                | Homo sapiens |
| 79632  | family with sequence similarity 184, member A                                                                                                                            | Homo sapiens |
| 138199 | chromosome 9 open reading frame 41                                                                                                                                       | Homo sapiens |
| 149371 | exocyst complex component 8                                                                                                                                              | Homo sapiens |
| 25907  | transmembrane protein 158                                                                                                                                                | Homo sapiens |
| 5932   | retinoblastoma binding protein 8                                                                                                                                         | Homo sapiens |
| 8675   | syntaxin 16                                                                                                                                                              | Homo sapiens |
| 3161   | hyaluronan-mediated motility receptor (RHAMM)                                                                                                                            | Homo sapiens |
| 79161  | chromosome 7 open reading frame 23                                                                                                                                       | Homo sapiens |
| 2273   | four and a half LIM domains 1                                                                                                                                            | Homo sapiens |
| 5432   | polymerase (RNA) II (DNA directed) polypeptide C, 33kDa                                                                                                                  | Homo sapiens |
| 65998  | hypothetical protein LOC65998                                                                                                                                            | Homo sapiens |
| 10042  | HMG box domain containing 4                                                                                                                                              | Homo sapiens |
| 5786   | protein tyrosine phosphatase, receptor type, A                                                                                                                           | Homo sapiens |
| 3280   | hairy and enhancer of split 1, (Drosophila)                                                                                                                              | Homo sapiens |
| 9793   | cytoskeleton associated protein 5                                                                                                                                        | Homo sapiens |
| 727751 | hypothetical LOC727751; hypothetical LOC729353                                                                                                                           | Homo sapiens |
| 4208   | myocyte enhancer factor 2C                                                                                                                                               | Homo sapiens |
| 2017   | cortactin                                                                                                                                                                | Homo sapiens |
| 1746   | distal-less homeobox 2                                                                                                                                                   | Homo sapiens |
| 5454   | POU class 3 homeobox 2                                                                                                                                                   | Homo sapiens |
| 80184  | centrosomal protein 290kDa                                                                                                                                               | Homo sapiens |
| 79717  | phosphopantothencysteine synthetase                                                                                                                                      | Homo sapiens |
| 9653   | heparan sulfate 2-O-sulfotransferase 1                                                                                                                                   | Homo sapiens |
| 129642 | membrane bound O-acyltransferase domain containing 2                                                                                                                     | Homo sapiens |
| 10051  | structural maintenance of chromosomes 4                                                                                                                                  | Homo sapiens |
| 3300   | DnaJ (Hsp40) homolog, subfamily B, member 2                                                                                                                              | Homo sapiens |
| 10890  | RAB10, member RAS oncogene family                                                                                                                                        | Homo sapiens |
| 84947  | serine active site containing 1                                                                                                                                          | Homo sapiens |
| 55704  | coiled-coil domain containing 88A                                                                                                                                        | Homo sapiens |
| 522    | ATP synthase, H <sup>+</sup> transporting, mitochondrial F0 complex, subunit F6                                                                                          | Homo sapiens |
| 55090  | mediator complex subunit 9                                                                                                                                               | Homo sapiens |
| 8398   | phospholipase A2, group VI (cytosolic, calcium-independent)                                                                                                              | Homo sapiens |
| 26098  | chromosome 10 open reading frame 137                                                                                                                                     | Homo sapiens |
| 10490  | vesicle transport through interaction with t-SNAREs homolog 1B (yeast)                                                                                                   | Homo sapiens |
| 51029  | PPPDE peptidase domain containing 1                                                                                                                                      | Homo sapiens |
| 9455   | homer homolog 2 (Drosophila)                                                                                                                                             | Homo sapiens |
| 2744   | glutaminase                                                                                                                                                              | Homo sapiens |
| 55722  | centrosomal protein 72kDa                                                                                                                                                | Homo sapiens |
| 2512   | similar to ferritin, light polypeptide; ferritin, light polypeptide                                                                                                      | Homo sapiens |
| 4921   | discoidin domain receptor tyrosine kinase 2                                                                                                                              | Homo sapiens |
| 64421  | DNA cross-link repair 1C (PSO2 homolog, S. cerevisiae)                                                                                                                   | Homo sapiens |
| 7837   | peroxidasin homolog (Drosophila)                                                                                                                                         | Homo sapiens |
| 7587   | zinc finger protein 37A                                                                                                                                                  | Homo sapiens |
| 80110  | zinc finger protein 61A                                                                                                                                                  | Homo sapiens |
| 11100  | heterogeneous nuclear ribonucleoprotein U-like 1                                                                                                                         | Homo sapiens |
| 118987 | PDZ domain containing 8                                                                                                                                                  | Homo sapiens |
| 9324   | high mobility group nucleosomal binding domain 3                                                                                                                         | Homo sapiens |

|           |                                                                                                     |              |
|-----------|-----------------------------------------------------------------------------------------------------|--------------|
| 25864     | abhydrolase domain containing 14A                                                                   | Homo sapiens |
| 84766     | EF-hand calcium binding domain 4B                                                                   | Homo sapiens |
| 54726     | OTU domain containing 4                                                                             | Homo sapiens |
| 26156     | ribosomal L1 domain containing 1                                                                    | Homo sapiens |
| 51520     | leucyl-tRNA synthetase                                                                              | Homo sapiens |
| 85476     | G elongation factor, mitochondrial 1                                                                | Homo sapiens |
| 83693     | hydroxysteroid dehydrogenase like 1                                                                 | Homo sapiens |
| 201283    | hypothetical protein FLJ32065                                                                       | Homo sapiens |
| 57560     | intraflagellar transport 80 homolog (Chlamydomonas)                                                 | Homo sapiens |
| 6741      | Sjogren syndrome antigen B (autoantigen La)                                                         | Homo sapiens |
| 135295    | serine-arginine repressor protein (35 kDa)                                                          | Homo sapiens |
| 64324     | nuclear receptor binding SET domain protein 1                                                       | Homo sapiens |
| 641638    | small nucleolar RNA host gene 6 (non-protein coding)                                                | Homo sapiens |
| 100288618 | hypothetical protein LOC100288618                                                                   | Homo sapiens |
| 80228     | ORAI calcium release-activated calcium modulator 2                                                  | Homo sapiens |
| 51134     | coiled-coil domain containing 41                                                                    | Homo sapiens |
| 349075    | zinc finger protein 713                                                                             | Homo sapiens |
| 116988    | ArfGAP with GTPase domain, ankyrin repeat and PH domain 3                                           | Homo sapiens |
| 100129405 | misato homolog 2 pseudogene                                                                         | Homo sapiens |
| 6924      | transcription elongation factor B (SIII), polypeptide 3 (110kDa, elongin A)                         | Homo sapiens |
| 54059     | chromosome 21 open reading frame 57                                                                 | Homo sapiens |
| 351       | amyloid beta (A4) precursor protein                                                                 | Homo sapiens |
| 10548     | transmembrane 9 superfamily member 1                                                                | Homo sapiens |
| 375484    | chromosome 5 open reading frame 25                                                                  | Homo sapiens |
| 3925      | stathmin 1                                                                                          | Homo sapiens |
| 10150     | muscleblind-like 2 (Drosophila)                                                                     | Homo sapiens |
| 81831     | neuropilin (NRP) and tolloid (TLL)-like 2                                                           | Homo sapiens |
| 3217      | homeobox B7                                                                                         | Homo sapiens |
| 10926     | DBF4 homolog (S. cerevisiae)                                                                        | Homo sapiens |
| 123263    | mitochondrial methionyl-tRNA formyltransferase                                                      | Homo sapiens |
| 283232    | transmembrane protein 80                                                                            | Homo sapiens |
| 222389    | BEN domain containing 7                                                                             | Homo sapiens |
| 8554      | protein inhibitor of activated STAT, 1                                                              | Homo sapiens |
| 10054     | ubiquitin-like modifier activating enzyme 2                                                         | Homo sapiens |
| 80273     | GrpE-like 1, mitochondrial (E. coli)                                                                | Homo sapiens |
| 55100     | WD repeat domain 70                                                                                 | Homo sapiens |
| 6917      | transcription elongation factor A (SII), 1 pseudogene 2; transcription elongation factor A (SII), 1 | Homo sapiens |
| 9802      | DAZ associated protein 2                                                                            | Homo sapiens |
| 79760     | gem (nuclear organelle) associated protein 7                                                        | Homo sapiens |
| 1738      | dihydrolipoamide dehydrogenase                                                                      | Homo sapiens |
| 4800      | nuclear transcription factor Y, alpha                                                               | Homo sapiens |
| 285590    | SH3 and PX domains 2B                                                                               | Homo sapiens |
| 5902      | similar to RAN binding protein 1; RAN binding protein 1                                             | Homo sapiens |
| 10526     | importin 8                                                                                          | Homo sapiens |
| 84312     | breast cancer metastasis-suppressor 1-like                                                          | Homo sapiens |
| 6683      | spastin                                                                                             | Homo sapiens |
| 55316     | radical S-adenosyl methionine domain containing 1                                                   | Homo sapiens |
| 55892     | myoneurin                                                                                           | Homo sapiens |
| 1267      | 2',3'-cyclic nucleotide 3' phosphodiesterase                                                        | Homo sapiens |
| 56288     | par-3 partitioning defective 3 homolog (C. elegans)                                                 | Homo sapiens |
| 85025     | transmembrane protein 60                                                                            | Homo sapiens |
| 54955     | chromosome 1 open reading frame 109                                                                 | Homo sapiens |
| 1155      | tubulin folding cofactor B                                                                          | Homo sapiens |
| 286148    | dpy-19-like 4 (C. elegans)                                                                          | Homo sapiens |
| 4953      | ornithine decarboxylase 1                                                                           | Homo sapiens |
| 10497     | unc-13 homolog B (C. elegans)                                                                       | Homo sapiens |
| 5708      | proteasome (prosome, macropain) 26S subunit, non-ATPase, 2                                          | Homo sapiens |
| 5411      | pinin, desmosome associated protein                                                                 | Homo sapiens |
| 79595     | Sin3A-associated protein, 130kDa                                                                    | Homo sapiens |
| 55031     | ubiquitin specific peptidase 47                                                                     | Homo sapiens |
| 10330     | canopy 2 homolog (zebrafish)                                                                        | Homo sapiens |
| 64783     | RNA binding motif protein 15                                                                        | Homo sapiens |
| 2517      | fucosidase, alpha-L- 1, tissue                                                                      | Homo sapiens |
| 57001     | ACN9 homolog (S. cerevisiae)                                                                        | Homo sapiens |
| 7290      | HIR histone cell cycle regulation defective homolog A (S. cerevisiae)                               | Homo sapiens |
| 8519      | interferon induced transmembrane protein 1 (9-27)                                                   | Homo sapiens |
| 729967    | MORN repeat containing 2                                                                            | Homo sapiens |
| 55250     | elongation protein 2 homolog (S. cerevisiae)                                                        | Homo sapiens |
| 51809     | UDP-N-acetyl-alpha-D-galactosamine:polypeptide N-acetylgalactosaminyltransferase 7 (GalNAc-T7)      | Homo sapiens |
| 90459     | exoribonuclease 1                                                                                   | Homo sapiens |
| 1040      | CDP-diacylglycerol synthase (phosphatidate cytidyltransferase) 1                                    | Homo sapiens |
| 90416     | chromosome 15 open reading frame 57                                                                 | Homo sapiens |
| 4929      | nuclear receptor subfamily 4, group A, member 2                                                     | Homo sapiens |
| 83606     | chromosome 22 open reading frame 13                                                                 | Homo sapiens |
| 9443      | mediator complex subunit 7                                                                          | Homo sapiens |

|        |                                                                                                             |              |
|--------|-------------------------------------------------------------------------------------------------------------|--------------|
| 7917   | HLA-B associated transcript 3                                                                               | Homo sapiens |
| 5576   | protein kinase, cAMP-dependent, regulatory, type II, alpha                                                  | Homo sapiens |
| 81566  | cysteine-serine-rich nuclear protein 2                                                                      | Homo sapiens |
| 6670   | Sp3 transcription factor                                                                                    | Homo sapiens |
| 3069   | high density lipoprotein binding protein                                                                    | Homo sapiens |
| 57600  | folliculin interacting protein 2                                                                            | Homo sapiens |
| 1051   | CCAAT/enhancer binding protein (C/EBP), beta                                                                | Homo sapiens |
| 51170  | hydroxysteroid (17-beta) dehydrogenase 11                                                                   | Homo sapiens |
| 83941  | TM2 domain containing 1                                                                                     | Homo sapiens |
| 79091  | chromosome 16 open reading frame 68                                                                         | Homo sapiens |
| 123920 | CKLF-like MARVEL transmembrane domain containing 3                                                          | Homo sapiens |
| 5074   | PRKC, apoptosis, WT1, regulator                                                                             | Homo sapiens |
| 579    | NK3 homeobox 2                                                                                              | Homo sapiens |
| 1602   | dachshund homolog 1 (Drosophila)                                                                            | Homo sapiens |
| 9491   | proteasome (prosome, macropain) inhibitor subunit 1 (PI31)                                                  | Homo sapiens |
| 54996  | MOCO sulphurase C-terminal domain containing 2                                                              | Homo sapiens |
| 4712   | NADH dehydrogenase (ubiquinone) 1 beta subcomplex, 6, 17kDa                                                 | Homo sapiens |
| 23259  | DDHD domain containing 2                                                                                    | Homo sapiens |
| 51706  | cytochrome b5 reductase 1                                                                                   | Homo sapiens |
| 400949 | FKSG49                                                                                                      | Homo sapiens |
| 10059  | dynamain 1-like                                                                                             | Homo sapiens |
| 9213   | xenotropic and polytropic retrovirus receptor                                                               | Homo sapiens |
| 169714 | quiescin Q6 sulfhydryl oxidase 2                                                                            | Homo sapiens |
| 1938   | eukaryotic translation elongation factor 2                                                                  | Homo sapiens |
| 2109   | electron-transfer-flavoprotein, beta polypeptide                                                            | Homo sapiens |
| 54797  | mediator complex subunit 18                                                                                 | Homo sapiens |
| 27095  | trafficking protein particle complex 3                                                                      | Homo sapiens |
| 25938  | HEAT repeat containing 5A                                                                                   | Homo sapiens |
| 139596 | uracil phosphoribosyltransferase (FUR1) homolog (S. cerevisiae)                                             | Homo sapiens |
| 57466  | splicing factor, arginine/serine-rich 15                                                                    | Homo sapiens |
| 56919  | DEAH (Asp-Glu-Ala-His) box polypeptide 33                                                                   | Homo sapiens |
| 23102  | TBC1 domain family, member 2B                                                                               | Homo sapiens |
| 51592  | tripartite motif-containing 33                                                                              | Homo sapiens |
| 10165  | solute carrier family 25, member 13 (citrin)                                                                | Homo sapiens |
| 6541   | solute carrier family 7 (cationic amino acid transporter, y+ system), member 1                              | Homo sapiens |
| 3840   | karyopherin alpha 4 (importin alpha 3)                                                                      | Homo sapiens |
| 83608  | chromosome 18 open reading frame 21                                                                         | Homo sapiens |
| 51121  | ribosomal protein L26-like 1                                                                                | Homo sapiens |
| 151230 | kelch-like 23 (Drosophila)                                                                                  | Homo sapiens |
| 10229  | coenzyme Q7 homolog, ubiquinone (yeast)                                                                     | Homo sapiens |
| 10565  | ADP-ribosylation factor guanine nucleotide-exchange factor 1 (brefeldin A-inhibited)                        | Homo sapiens |
| 3074   | hexosaminidase B (beta polypeptide)                                                                         | Homo sapiens |
| 441366 | hypothetical gene supported by BX538329                                                                     | Homo sapiens |
| 4012   | leucyl/cystinyl aminopeptidase                                                                              | Homo sapiens |
| 3609   | interleukin enhancer binding factor 3, 90kDa                                                                | Homo sapiens |
| 6636   | small nuclear ribonucleoprotein polypeptide F                                                               | Homo sapiens |
| 3622   | inhibitor of growth family, member 2                                                                        | Homo sapiens |
| 81853  | transmembrane protein 14D; transmembrane protein 14B                                                        | Homo sapiens |
| 79134  | transmembrane protein 185B (pseudogene)                                                                     | Homo sapiens |
| 57606  | SLAIN motif family, member 2                                                                                | Homo sapiens |
| 5208   | 6-phosphofructo-2-kinase/fructose-2,6-bisphosphatase 2                                                      | Homo sapiens |
| 55740  | enabled homolog (Drosophila)                                                                                | Homo sapiens |
| 143888 | KDEL (Lys-Asp-Glu-Leu) containing 2                                                                         | Homo sapiens |
| 29082  | chromatin modifying protein 4A                                                                              | Homo sapiens |
| 644246 | hypothetical protein LOC644246                                                                              | Homo sapiens |
| 286097 | EF-hand domain family, member A2                                                                            | Homo sapiens |
| 26207  | phosphatidylinositol transfer protein, cytoplasmic 1                                                        | Homo sapiens |
| 5202   | prefoldin subunit 2                                                                                         | Homo sapiens |
| 149832 | hypothetical protein LOC149832                                                                              | Homo sapiens |
| 9208   | leucine rich repeat (in FLII) interacting protein 1                                                         | Homo sapiens |
| 8690   | jerky homolog-like (mouse)                                                                                  | Homo sapiens |
| 55669  | mitofusin 1                                                                                                 | Homo sapiens |
| 81611  | acidic (leucine-rich) nuclear phosphoprotein 32 family, member E                                            | Homo sapiens |
| 92482  | non-protein coding RNA 81                                                                                   | Homo sapiens |
| 57118  | calcium/calmodulin-dependent protein kinase ID                                                              | Homo sapiens |
| 644511 | ribosomal protein L13a pseudogene 6                                                                         | Homo sapiens |
| 9824   | Rho GTPase activating protein 11B; Rho GTPase activating protein 11A                                        | Homo sapiens |
| 7072   | TIA1 cytotoxic granule-associated RNA binding protein                                                       | Homo sapiens |
| 85440  | dedicator of cytokinesis 7                                                                                  | Homo sapiens |
| 84084  | RAB6C, member RAS oncogene family; RAB6A, member RAS oncogene family; hypothetical LOC100130819; RAB6C-like | Homo sapiens |
| 5870   | RAB6C, member RAS oncogene family; RAB6A, member RAS oncogene family; hypothetical LOC100130819; RAB6C-like | Homo sapiens |
| 5877   | RAB interacting factor                                                                                      | Homo sapiens |
| 135293 | peptidase M20 domain containing 2                                                                           | Homo sapiens |
| 118429 | anthrax toxin receptor 2                                                                                    | Homo sapiens |
| 80255  | solute carrier family 35, member F5                                                                         | Homo sapiens |



|           |                                                                                                                                                                                                                                                                                                                                                                                                                                                                                                                                                                                                                                                                                                                                                                                                                                                                                                                 |              |
|-----------|-----------------------------------------------------------------------------------------------------------------------------------------------------------------------------------------------------------------------------------------------------------------------------------------------------------------------------------------------------------------------------------------------------------------------------------------------------------------------------------------------------------------------------------------------------------------------------------------------------------------------------------------------------------------------------------------------------------------------------------------------------------------------------------------------------------------------------------------------------------------------------------------------------------------|--------------|
| 6144      | ribosomal protein L21 pseudogene 134; ribosomal protein L21 pseudogene 80; ribosomal protein L21 pseudogene 20; ribosomal protein L21 pseudogene 46; ribosomal protein L21 pseudogene 45; ribosomal protein L21 pseudogene 131; ribosomal protein L21 pseudogene 16; ribosomal protein L21 pseudogene 53; ribosomal protein L21 pseudogene 120; ribosomal protein L21 pseudogene 37; ribosomal protein L21 pseudogene 93; ribosomal protein L21 pseudogene 39; ribosomal protein L21 pseudogene 29; ribosomal protein L21 pseudogene 28; ribosomal protein L21 pseudogene 14; ribosomal protein L21 pseudogene 98; ribosomal protein L21 pseudogene 105; ribosomal protein L21 pseudogene 87; ribosomal protein L21 pseudogene 128; ribosomal protein L21 pseudogene 69; ribosomal protein L21 pseudogene 97; ribosomal protein L21; ribosomal protein L21 pseudogene 119; ribosomal protein L21 pseudogene 125 | Homo sapiens |
| 84725     | pleckstrin homology domain containing, family A (phosphoinositide binding specific) member 8                                                                                                                                                                                                                                                                                                                                                                                                                                                                                                                                                                                                                                                                                                                                                                                                                    | Homo sapiens |
| 113251    | La ribonucleoprotein domain family, member 4                                                                                                                                                                                                                                                                                                                                                                                                                                                                                                                                                                                                                                                                                                                                                                                                                                                                    | Homo sapiens |
| 266655    | non-protein coding RNA 94                                                                                                                                                                                                                                                                                                                                                                                                                                                                                                                                                                                                                                                                                                                                                                                                                                                                                       | Homo sapiens |
| 79872     | Cas-Br-M (murine) ecotropic retroviral transforming sequence-like 1                                                                                                                                                                                                                                                                                                                                                                                                                                                                                                                                                                                                                                                                                                                                                                                                                                             | Homo sapiens |
| 3998      | lectin, mannose-binding, 1                                                                                                                                                                                                                                                                                                                                                                                                                                                                                                                                                                                                                                                                                                                                                                                                                                                                                      | Homo sapiens |
| 23170     | tubulin tyrosine ligase-like family, member 12                                                                                                                                                                                                                                                                                                                                                                                                                                                                                                                                                                                                                                                                                                                                                                                                                                                                  | Homo sapiens |
| 10550     | ADP-ribosylation-like factor 6 interacting protein 5                                                                                                                                                                                                                                                                                                                                                                                                                                                                                                                                                                                                                                                                                                                                                                                                                                                            | Homo sapiens |
| 138311    | family with sequence similarity 69, member B                                                                                                                                                                                                                                                                                                                                                                                                                                                                                                                                                                                                                                                                                                                                                                                                                                                                    | Homo sapiens |
| 7678      | zinc finger protein 124                                                                                                                                                                                                                                                                                                                                                                                                                                                                                                                                                                                                                                                                                                                                                                                                                                                                                         | Homo sapiens |
| 1958      | early growth response 1                                                                                                                                                                                                                                                                                                                                                                                                                                                                                                                                                                                                                                                                                                                                                                                                                                                                                         | Homo sapiens |
| 54902     | tetratricopeptide repeat domain 19                                                                                                                                                                                                                                                                                                                                                                                                                                                                                                                                                                                                                                                                                                                                                                                                                                                                              | Homo sapiens |
| 51643     | transmembrane BAX inhibitor motif containing 4                                                                                                                                                                                                                                                                                                                                                                                                                                                                                                                                                                                                                                                                                                                                                                                                                                                                  | Homo sapiens |
| 163259    | DENN/MADD domain containing 2C                                                                                                                                                                                                                                                                                                                                                                                                                                                                                                                                                                                                                                                                                                                                                                                                                                                                                  | Homo sapiens |
| 6166      | ribosomal protein L36a-like                                                                                                                                                                                                                                                                                                                                                                                                                                                                                                                                                                                                                                                                                                                                                                                                                                                                                     | Homo sapiens |
| 51734     | selenoprotein X, 1                                                                                                                                                                                                                                                                                                                                                                                                                                                                                                                                                                                                                                                                                                                                                                                                                                                                                              | Homo sapiens |
| 90268     | family with sequence similarity 105, member B                                                                                                                                                                                                                                                                                                                                                                                                                                                                                                                                                                                                                                                                                                                                                                                                                                                                   | Homo sapiens |
| 57474     | zinc finger protein 490                                                                                                                                                                                                                                                                                                                                                                                                                                                                                                                                                                                                                                                                                                                                                                                                                                                                                         | Homo sapiens |
| 51201     | zinc finger, DHHC-type containing 2                                                                                                                                                                                                                                                                                                                                                                                                                                                                                                                                                                                                                                                                                                                                                                                                                                                                             | Homo sapiens |
| 221785    | zinc finger protein 498                                                                                                                                                                                                                                                                                                                                                                                                                                                                                                                                                                                                                                                                                                                                                                                                                                                                                         | Homo sapiens |
| 9126      | structural maintenance of chromosomes 3                                                                                                                                                                                                                                                                                                                                                                                                                                                                                                                                                                                                                                                                                                                                                                                                                                                                         | Homo sapiens |
| 9810      | ring finger protein 40                                                                                                                                                                                                                                                                                                                                                                                                                                                                                                                                                                                                                                                                                                                                                                                                                                                                                          | Homo sapiens |
| 84986     | Rho GTPase activating protein 19                                                                                                                                                                                                                                                                                                                                                                                                                                                                                                                                                                                                                                                                                                                                                                                                                                                                                | Homo sapiens |
| 9675      | KIAA0406                                                                                                                                                                                                                                                                                                                                                                                                                                                                                                                                                                                                                                                                                                                                                                                                                                                                                                        | Homo sapiens |
| 7569      | zinc finger protein 182                                                                                                                                                                                                                                                                                                                                                                                                                                                                                                                                                                                                                                                                                                                                                                                                                                                                                         | Homo sapiens |
| 133522    | peroxisome proliferator-activated receptor gamma, coactivator 1 beta                                                                                                                                                                                                                                                                                                                                                                                                                                                                                                                                                                                                                                                                                                                                                                                                                                            | Homo sapiens |
| 2926      | G-rich RNA sequence binding factor 1                                                                                                                                                                                                                                                                                                                                                                                                                                                                                                                                                                                                                                                                                                                                                                                                                                                                            | Homo sapiens |
| 9926      | lysophosphatidylglycerol acyltransferase 1                                                                                                                                                                                                                                                                                                                                                                                                                                                                                                                                                                                                                                                                                                                                                                                                                                                                      | Homo sapiens |
| 51535     | periphilin 1                                                                                                                                                                                                                                                                                                                                                                                                                                                                                                                                                                                                                                                                                                                                                                                                                                                                                                    | Homo sapiens |
| 9730      | Vpr (HIV-1) binding protein                                                                                                                                                                                                                                                                                                                                                                                                                                                                                                                                                                                                                                                                                                                                                                                                                                                                                     | Homo sapiens |
| 100101467 | zinc finger protein 397 opposite strand                                                                                                                                                                                                                                                                                                                                                                                                                                                                                                                                                                                                                                                                                                                                                                                                                                                                         | Homo sapiens |
| 7553      | zinc finger protein 7                                                                                                                                                                                                                                                                                                                                                                                                                                                                                                                                                                                                                                                                                                                                                                                                                                                                                           | Homo sapiens |
| 51668     | heat shock protein family B (small), member 11                                                                                                                                                                                                                                                                                                                                                                                                                                                                                                                                                                                                                                                                                                                                                                                                                                                                  | Homo sapiens |
| 6418      | SET nuclear oncogene; similar to SET translocation                                                                                                                                                                                                                                                                                                                                                                                                                                                                                                                                                                                                                                                                                                                                                                                                                                                              | Homo sapiens |
| 9863      | membrane associated guanylate kinase, WW and PDZ domain containing 2                                                                                                                                                                                                                                                                                                                                                                                                                                                                                                                                                                                                                                                                                                                                                                                                                                            | Homo sapiens |
| 51633     | OTU domain containing 6B                                                                                                                                                                                                                                                                                                                                                                                                                                                                                                                                                                                                                                                                                                                                                                                                                                                                                        | Homo sapiens |
| 2117      | ets variant 3                                                                                                                                                                                                                                                                                                                                                                                                                                                                                                                                                                                                                                                                                                                                                                                                                                                                                                   | Homo sapiens |
| 80755     | alanyl-tRNA synthetase domain containing 1                                                                                                                                                                                                                                                                                                                                                                                                                                                                                                                                                                                                                                                                                                                                                                                                                                                                      | Homo sapiens |
| 51072     | mediator of cell motility 1; similar to mediator of cell motility 1                                                                                                                                                                                                                                                                                                                                                                                                                                                                                                                                                                                                                                                                                                                                                                                                                                             | Homo sapiens |
| 54148     | mitochondrial ribosomal protein L39                                                                                                                                                                                                                                                                                                                                                                                                                                                                                                                                                                                                                                                                                                                                                                                                                                                                             | Homo sapiens |
| 83549     | uridine-cytidine kinase 1                                                                                                                                                                                                                                                                                                                                                                                                                                                                                                                                                                                                                                                                                                                                                                                                                                                                                       | Homo sapiens |
| 1200      | tripeptidyl peptidase I                                                                                                                                                                                                                                                                                                                                                                                                                                                                                                                                                                                                                                                                                                                                                                                                                                                                                         | Homo sapiens |
| 196047    | EMX2 opposite strand (non-protein coding)                                                                                                                                                                                                                                                                                                                                                                                                                                                                                                                                                                                                                                                                                                                                                                                                                                                                       | Homo sapiens |
| 9470      | eukaryotic translation initiation factor 4E family member 2                                                                                                                                                                                                                                                                                                                                                                                                                                                                                                                                                                                                                                                                                                                                                                                                                                                     | Homo sapiens |
| 10252     | sprouty homolog 1, antagonist of FGF signaling (Drosophila)                                                                                                                                                                                                                                                                                                                                                                                                                                                                                                                                                                                                                                                                                                                                                                                                                                                     | Homo sapiens |
| 83451     | abhydrolase domain containing 11                                                                                                                                                                                                                                                                                                                                                                                                                                                                                                                                                                                                                                                                                                                                                                                                                                                                                | Homo sapiens |
| 54585     | leucine zipper transcription factor-like 1                                                                                                                                                                                                                                                                                                                                                                                                                                                                                                                                                                                                                                                                                                                                                                                                                                                                      | Homo sapiens |
| 285958    | chromosome 7 open reading frame 40                                                                                                                                                                                                                                                                                                                                                                                                                                                                                                                                                                                                                                                                                                                                                                                                                                                                              | Homo sapiens |
| 11266     | dual specificity phosphatase 12                                                                                                                                                                                                                                                                                                                                                                                                                                                                                                                                                                                                                                                                                                                                                                                                                                                                                 | Homo sapiens |
| 79706     | PRKR interacting protein 1 (IL11 inducible)                                                                                                                                                                                                                                                                                                                                                                                                                                                                                                                                                                                                                                                                                                                                                                                                                                                                     | Homo sapiens |
| 5046      | proprotein convertase subtilisin/kexin type 6                                                                                                                                                                                                                                                                                                                                                                                                                                                                                                                                                                                                                                                                                                                                                                                                                                                                   | Homo sapiens |
| 10360     | nucleophosmin/nucleoplasm, 3                                                                                                                                                                                                                                                                                                                                                                                                                                                                                                                                                                                                                                                                                                                                                                                                                                                                                    | Homo sapiens |
| 7422      | vascular endothelial growth factor A                                                                                                                                                                                                                                                                                                                                                                                                                                                                                                                                                                                                                                                                                                                                                                                                                                                                            | Homo sapiens |
| 1063      | centromere protein F, 350/400ka (mitosin)                                                                                                                                                                                                                                                                                                                                                                                                                                                                                                                                                                                                                                                                                                                                                                                                                                                                       | Homo sapiens |
| 10329     | transmembrane protein 5                                                                                                                                                                                                                                                                                                                                                                                                                                                                                                                                                                                                                                                                                                                                                                                                                                                                                         | Homo sapiens |
| 5832      | aldehyde dehydrogenase 18 family, member A1                                                                                                                                                                                                                                                                                                                                                                                                                                                                                                                                                                                                                                                                                                                                                                                                                                                                     | Homo sapiens |
| 10733     | polo-like kinase 4 (Drosophila)                                                                                                                                                                                                                                                                                                                                                                                                                                                                                                                                                                                                                                                                                                                                                                                                                                                                                 | Homo sapiens |
| 84132     | ubiquitin specific peptidase 42                                                                                                                                                                                                                                                                                                                                                                                                                                                                                                                                                                                                                                                                                                                                                                                                                                                                                 | Homo sapiens |
| 285672    | SFRS12-interacting protein 1; family with sequence similarity 159, member B                                                                                                                                                                                                                                                                                                                                                                                                                                                                                                                                                                                                                                                                                                                                                                                                                                     | Homo sapiens |
| 160897    | G protein-coupled receptor 180                                                                                                                                                                                                                                                                                                                                                                                                                                                                                                                                                                                                                                                                                                                                                                                                                                                                                  | Homo sapiens |
| 27130     | inversin                                                                                                                                                                                                                                                                                                                                                                                                                                                                                                                                                                                                                                                                                                                                                                                                                                                                                                        | Homo sapiens |
| 9454      | homer homolog 3 (Drosophila)                                                                                                                                                                                                                                                                                                                                                                                                                                                                                                                                                                                                                                                                                                                                                                                                                                                                                    | Homo sapiens |
| 55154     | misato homolog 1 (Drosophila)                                                                                                                                                                                                                                                                                                                                                                                                                                                                                                                                                                                                                                                                                                                                                                                                                                                                                   | Homo sapiens |
| 134147    | carboxymethylenebutenolidase homolog (Pseudomonas)                                                                                                                                                                                                                                                                                                                                                                                                                                                                                                                                                                                                                                                                                                                                                                                                                                                              | Homo sapiens |
| 23186     | REST corepressor 1                                                                                                                                                                                                                                                                                                                                                                                                                                                                                                                                                                                                                                                                                                                                                                                                                                                                                              | Homo sapiens |
| 7804      | low density lipoprotein receptor-related protein 8, apolipoprotein e receptor                                                                                                                                                                                                                                                                                                                                                                                                                                                                                                                                                                                                                                                                                                                                                                                                                                   | Homo sapiens |

|        |                                                                                                                                                                                                                                                                               |              |
|--------|-------------------------------------------------------------------------------------------------------------------------------------------------------------------------------------------------------------------------------------------------------------------------------|--------------|
| 10695  | canopy 3 homolog (zebrafish)                                                                                                                                                                                                                                                  | Homo sapiens |
| 875    | cystathionine-beta-synthase                                                                                                                                                                                                                                                   | Homo sapiens |
| 51727  | cytidine monophosphate (UMP-CMP) kinase 1, cytosolic                                                                                                                                                                                                                          | Homo sapiens |
| 6745   | signal sequence receptor, alpha                                                                                                                                                                                                                                               | Homo sapiens |
| 1743   | dihydrolipoamide S-succinyltransferase (E2 component of 2-oxo-glutarate complex);<br>dihydrolipoamide S-succinyltransferase pseudogene (E2 component of 2-oxo-glutarate complex)                                                                                              | Homo sapiens |
| 146223 | CKLF-like MARVEL transmembrane domain containing 4                                                                                                                                                                                                                            | Homo sapiens |
| 26271  | F-box protein 5                                                                                                                                                                                                                                                               | Homo sapiens |
| 7157   | tumor protein p53                                                                                                                                                                                                                                                             | Homo sapiens |
| 728643 | heterogeneous nuclear ribonucleoprotein A1-like 3; similar to heterogeneous nuclear<br>ribonucleoprotein A1; heterogeneous nuclear ribonucleoprotein A1 pseudogene 2;<br>heterogeneous nuclear ribonucleoprotein A1; heterogeneous nuclear ribonucleoprotein A1<br>pseudogene | Homo sapiens |
| 664709 | heterogeneous nuclear ribonucleoprotein A1-like 3; similar to heterogeneous nuclear<br>ribonucleoprotein A1; heterogeneous nuclear ribonucleoprotein A1 pseudogene 2;<br>heterogeneous nuclear ribonucleoprotein A1; heterogeneous nuclear ribonucleoprotein A1<br>pseudogene | Homo sapiens |
| 3178   | heterogeneous nuclear ribonucleoprotein A1-like 3; similar to heterogeneous nuclear<br>ribonucleoprotein A1; heterogeneous nuclear ribonucleoprotein A1 pseudogene 2;<br>heterogeneous nuclear ribonucleoprotein A1; heterogeneous nuclear ribonucleoprotein A1<br>pseudogene | Homo sapiens |
| 133619 | proline-rich coiled-coil 1                                                                                                                                                                                                                                                    | Homo sapiens |
| 146542 | zinc finger protein 688; zinc finger protein 785                                                                                                                                                                                                                              | Homo sapiens |
| 3420   | isocitrate dehydrogenase 3 (NAD+) beta                                                                                                                                                                                                                                        | Homo sapiens |
| 1841   | deoxythymidylate kinase (thymidylate kinase); similar to Deoxythymidylate kinase<br>(thymidylate kinase)                                                                                                                                                                      | Homo sapiens |
| 400410 | suppressor of tumorigenicity 20                                                                                                                                                                                                                                               | Homo sapiens |
| 11030  | RNA binding protein with multiple splicing                                                                                                                                                                                                                                    | Homo sapiens |
| 347734 | solute carrier family 35, member B2                                                                                                                                                                                                                                           | Homo sapiens |
| 847    | catalase                                                                                                                                                                                                                                                                      | Homo sapiens |
| 96764  | trimethylguanosine synthase homolog (S. cerevisiae)                                                                                                                                                                                                                           | Homo sapiens |
| 4722   | NADH dehydrogenase (ubiquinone) Fe-S protein 3, 30kDa (NADH-coenzyme Q reductase)                                                                                                                                                                                             | Homo sapiens |
| 10768  | adenosylhomocysteinase-like 1                                                                                                                                                                                                                                                 | Homo sapiens |
| 23657  | solute carrier family 7, (cationic amino acid transporter, y+ system) member 11                                                                                                                                                                                               | Homo sapiens |
| 9939   | RNA binding motif protein 8A                                                                                                                                                                                                                                                  | Homo sapiens |
| 10126  | dynein, axonemal, light chain 4                                                                                                                                                                                                                                               | Homo sapiens |
| 6233   | ribosomal protein S27a pseudogene 12; ribosomal protein S27a; ribosomal protein S27a<br>pseudogene 11; ribosomal protein S27a pseudogene 16                                                                                                                                   | Homo sapiens |
| 25909  | AT hook containing transcription factor 1; AT hook containing transcription factor 1<br>pseudogene                                                                                                                                                                            | Homo sapiens |
| 5457   | POU class 4 homeobox 1                                                                                                                                                                                                                                                        | Homo sapiens |
| 1557   | cytochrome P450, family 2, subfamily C, polypeptide 19                                                                                                                                                                                                                        | Homo sapiens |
| 50810  | hepatoma-derived growth factor, related protein 3                                                                                                                                                                                                                             | Homo sapiens |
| 5638   | proline rich Gla (G-carboxyglutamic acid) 1                                                                                                                                                                                                                                   | Homo sapiens |
| 27249  | methylmalonic aciduria (cobalamin deficiency) cblD type, with homocystinuria                                                                                                                                                                                                  | Homo sapiens |
| 257396 | hypothetical protein LOC257396                                                                                                                                                                                                                                                | Homo sapiens |
| 7596   | zinc finger protein 45                                                                                                                                                                                                                                                        | Homo sapiens |
| 54014  | bromodomain and WD repeat domain containing 1                                                                                                                                                                                                                                 | Homo sapiens |
| 84933  | chromosome 8 open reading frame 76                                                                                                                                                                                                                                            | Homo sapiens |
| 29889  | guanine nucleotide binding protein-like 2 (nucleolar)                                                                                                                                                                                                                         | Homo sapiens |
| 4783   | nuclear factor, interleukin 3 regulated                                                                                                                                                                                                                                       | Homo sapiens |
| 8295   | transformation/transcription domain-associated protein                                                                                                                                                                                                                        | Homo sapiens |
| 55071  | chromosome 9 open reading frame 40                                                                                                                                                                                                                                            | Homo sapiens |
| 64207  | chromosome 14 open reading frame 4                                                                                                                                                                                                                                            | Homo sapiens |
| 8526   | diacylglycerol kinase, epsilon 64kDa                                                                                                                                                                                                                                          | Homo sapiens |
| 10298  | p21 protein (Cdc42/Rac)-activated kinase 4                                                                                                                                                                                                                                    | Homo sapiens |
| 4199   | malic enzyme 1, NADP(+)-dependent, cytosolic                                                                                                                                                                                                                                  | Homo sapiens |
| 654342 | lymphocyte-specific protein 1 pseudogene                                                                                                                                                                                                                                      | Homo sapiens |
| 645166 | lymphocyte-specific protein 1 pseudogene                                                                                                                                                                                                                                      | Homo sapiens |
| 2149   | coagulation factor II (thrombin) receptor                                                                                                                                                                                                                                     | Homo sapiens |
| 1837   | dystrobrevin, alpha                                                                                                                                                                                                                                                           | Homo sapiens |
| 11052  | cleavage and polyadenylation specific factor 6, 68kDa                                                                                                                                                                                                                         | Homo sapiens |
| 22856  | chondroitin sulfate synthase 1                                                                                                                                                                                                                                                | Homo sapiens |
| 5141   | phosphodiesterase 4A, cAMP-specific (phosphodiesterase E2 dunce homolog, Drosophila)                                                                                                                                                                                          | Homo sapiens |
| 51060  | thioredoxin domain containing 12 (endoplasmic reticulum)                                                                                                                                                                                                                      | Homo sapiens |
| 91404  | SEC14 and spectrin domains 1                                                                                                                                                                                                                                                  | Homo sapiens |
| 84259  | DCN1, defective in cullin neddylation 1, domain containing 5 (S. cerevisiae)                                                                                                                                                                                                  | Homo sapiens |
| 2547   | X-ray repair complementing defective repair in Chinese hamster cells 6; similar to ATP-<br>dependent DNA helicase II, 70 kDa subunit                                                                                                                                          | Homo sapiens |
| 8502   | plakophilin 4                                                                                                                                                                                                                                                                 | Homo sapiens |
| 8503   | phosphoinositide-3-kinase, regulatory subunit 3 (gamma)                                                                                                                                                                                                                       | Homo sapiens |
| 59338  | pleckstrin homology domain containing, family A (phosphoinositide binding specific) member<br>1                                                                                                                                                                               | Homo sapiens |
| 54811  | zinc finger protein 562                                                                                                                                                                                                                                                       | Homo sapiens |
| 84897  | transforming growth factor beta regulator 1                                                                                                                                                                                                                                   | Homo sapiens |
| 245812 | canopy 4 homolog (zebrafish)                                                                                                                                                                                                                                                  | Homo sapiens |

|        |                                                                                                  |              |
|--------|--------------------------------------------------------------------------------------------------|--------------|
| 23594  | origin recognition complex, subunit 6 like (yeast)                                               | Homo sapiens |
| 84901  | nuclear factor of activated T-cells, cytoplasmic, calcineurin-dependent 2 interacting protein    | Homo sapiens |
| 4507   | methylthioadenosine phosphorylase                                                                | Homo sapiens |
| 6224   | ribosomal protein S20                                                                            | Homo sapiens |
| 8480   | RAE1 RNA export 1 homolog (S. pombe)                                                             | Homo sapiens |
| 440026 | transmembrane protein 41B                                                                        | Homo sapiens |
| 128439 | small nucleolar RNA host gene 11 (non-protein coding)                                            | Homo sapiens |
| 26100  | WD repeat domain, phosphoinositide interacting 2                                                 | Homo sapiens |
| 2990   | glucuronidase, beta                                                                              | Homo sapiens |
| 6642   | sorting nexin 1                                                                                  | Homo sapiens |
| 51104  | family with sequence similarity 108, member B1                                                   | Homo sapiens |
| 23306  | transmembrane protein 194A                                                                       | Homo sapiens |
| 2161   | coagulation factor XII (Hageman factor)                                                          | Homo sapiens |
| 7111   | tropomodulin 1                                                                                   | Homo sapiens |
| 55432  | YOD1 OTU deubiquinating enzyme 1 homolog (S. cerevisiae)                                         | Homo sapiens |
| 10614  | hexamethylene bis-acetamide inducible 1                                                          | Homo sapiens |
| 79031  | phosducin-like 3 pseudogene; phosducin-like 3                                                    | Homo sapiens |
| 285359 | phosducin-like 3 pseudogene; phosducin-like 3                                                    | Homo sapiens |
| 64282  | PAP associated domain containing 5                                                               | Homo sapiens |
| 54914  | KIAA1797                                                                                         | Homo sapiens |
| 57102  | chromosome 12 open reading frame 40; chromosome 12 open reading frame 4                          | Homo sapiens |
| 255758 | Tctex1 domain containing 2                                                                       | Homo sapiens |
| 56521  | DnaJ (Hsp40) homolog, subfamily C, member 12                                                     | Homo sapiens |
| 2869   | G protein-coupled receptor kinase 5                                                              | Homo sapiens |
| 120103 | solute carrier family 36 (proton/amino acid symporter), member 4                                 | Homo sapiens |
| 10018  | BCL2-like 11 (apoptosis facilitator)                                                             | Homo sapiens |
| 10400  | phosphatidylethanolamine N-methyltransferase                                                     | Homo sapiens |
| 53917  | RAB24, member RAS oncogene family                                                                | Homo sapiens |
| 55850  | unconventional SNARE in the ER 1 homolog (S. cerevisiae)                                         | Homo sapiens |
| 29925  | GDP-mannose pyrophosphorylase B                                                                  | Homo sapiens |
| 6443   | sarcoglycan, beta (43kDa dystrophin-associated glycoprotein)                                     | Homo sapiens |
| 4835   | NAD(P)H dehydrogenase, quinone 2                                                                 | Homo sapiens |
| 57179  | KIAA1191                                                                                         | Homo sapiens |
| 26468  | LIM homeobox 6                                                                                   | Homo sapiens |
| 84656  | cytokine-like nuclear factor n-pac                                                               | Homo sapiens |
| 112495 | general transcription factor IIIC, polypeptide 6, alpha 35kDa                                    | Homo sapiens |
| 51204  | coiled-coil domain containing 44                                                                 | Homo sapiens |
| 79736  | chromosome 17 open reading frame 42                                                              | Homo sapiens |
| 5928   | hypothetical LOC642954; retinoblastoma binding protein 4                                         | Homo sapiens |
| 64395  | germ cell-less homolog 1 (Drosophila)-like; germ cell-less homolog 1 (Drosophila)                | Homo sapiens |
| 64396  | germ cell-less homolog 1 (Drosophila)-like; germ cell-less homolog 1 (Drosophila)                | Homo sapiens |
| 54499  | transmembrane and coiled-coil domains 1                                                          | Homo sapiens |
| 4701   | NADH dehydrogenase (ubiquinone) 1 alpha subcomplex, 7, 14.5kDa                                   | Homo sapiens |
| 192670 | eukaryotic translation initiation factor 2C, 4                                                   | Homo sapiens |
| 9191   | death effector domain containing                                                                 | Homo sapiens |
| 599    | BCL2-like 2                                                                                      | Homo sapiens |
| 6749   | structure specific recognition protein 1                                                         | Homo sapiens |
| 833    | cysteinyl-tRNA synthetase                                                                        | Homo sapiens |
| 57017  | coenzyme Q9 homolog (S. cerevisiae)                                                              | Homo sapiens |
| 26064  | retinoic acid induced 14                                                                         | Homo sapiens |
| 54557  | small glutamine-rich tetratricopeptide repeat (TPR)-containing, beta                             | Homo sapiens |
| 5867   | RAB4A, member RAS oncogene family                                                                | Homo sapiens |
| 7458   | eukaryotic translation initiation factor 4H                                                      | Homo sapiens |
| 2037   | erythrocyte membrane protein band 4.1-like 2                                                     | Homo sapiens |
| 10052  | gap junction protein, gamma 1, 45kDa                                                             | Homo sapiens |
| 11138  | TBC1 domain family, member 8 (with GRAM domain)                                                  | Homo sapiens |
| 90390  | mediator complex subunit 30                                                                      | Homo sapiens |
| 51128  | SAR1 homolog B (S. cerevisiae)                                                                   | Homo sapiens |
| 9969   | mediator complex subunit 13                                                                      | Homo sapiens |
| 353376 | transmembrane emp24 protein transport domain containing 7; toll-like receptor adaptor molecule 2 | Homo sapiens |
| 51014  | transmembrane emp24 protein transport domain containing 7; toll-like receptor adaptor molecule 2 | Homo sapiens |
| 6500   | S-phase kinase-associated protein 1                                                              | Homo sapiens |
| 4150   | MYC-associated zinc finger protein (purine-binding transcription factor)                         | Homo sapiens |
| 27005  | ubiquitin specific peptidase 21                                                                  | Homo sapiens |
| 10040  | target of mybl (chicken)-like 1                                                                  | Homo sapiens |
| 440944 | hypothetical LOC440944                                                                           | Homo sapiens |
| 5191   | peroxisomal biogenesis factor 7                                                                  | Homo sapiens |
| 54464  | 5'-3' exoribonuclease 1                                                                          | Homo sapiens |
| 4735   | septin 2                                                                                         | Homo sapiens |
| 2745   | glutaredoxin (thioltransferase)                                                                  | Homo sapiens |
| 9794   | mastermind-like 1 (Drosophila)                                                                   | Homo sapiens |
| 2947   | glutathione S-transferase mu 3 (brain)                                                           | Homo sapiens |
| 57026  | pyridoxal (pyridoxine, vitamin B6) phosphatase                                                   | Homo sapiens |
| 54332  | ganglioside-induced differentiation-associated protein 1                                         | Homo sapiens |

|        |                                                                        |              |
|--------|------------------------------------------------------------------------|--------------|
| 51726  | DnaJ (Hsp40) homolog, subfamily B, member 11                           | Homo sapiens |
| 27236  | ADP-ribosylation factor interacting protein 1                          | Homo sapiens |
| 64225  | atlastin GTPase 2                                                      | Homo sapiens |
| 54434  | slingshot homolog 1 (Drosophila)                                       | Homo sapiens |
| 8237   | ubiquitin specific peptidase 11                                        | Homo sapiens |
| 6902   | tubulin folding cofactor A                                             | Homo sapiens |
| 540    | ATPase, Cu <sup>++</sup> transporting, beta polypeptide                | Homo sapiens |
| 8602   | NOPI4 nucleolar protein homolog (yeast)                                | Homo sapiens |
| 57727  | nuclear receptor coactivator 5                                         | Homo sapiens |
| 4733   | developmentally regulated GTP binding protein 1                        | Homo sapiens |
| 123606 | non imprinted in Prader-Willi/Angelman syndrome 1                      | Homo sapiens |
| 23288  | IQ motif containing E                                                  | Homo sapiens |
| 51660  | brain protein 44-like                                                  | Homo sapiens |
| 4548   | 5-methyltetrahydrofolate-homocysteine methyltransferase                | Homo sapiens |
| 55871  | COBW domain containing 6; COBW domain containing 1                     | Homo sapiens |
| 644019 | COBW domain containing 6; COBW domain containing 1                     | Homo sapiens |
| 10969  | EBNA1 binding protein 2                                                | Homo sapiens |
| 29123  | ankyrin repeat domain 11; hypothetical protein LOC100128265            | Homo sapiens |
| 8674   | vesicle-associated membrane protein 4                                  | Homo sapiens |
| 54913  | ribonuclease P/MRP 25kDa subunit                                       | Homo sapiens |
| 11340  | exosome component 8                                                    | Homo sapiens |
| 10248  | processing of precursor 7, ribonuclease P/MRP subunit (S. cerevisiae)  | Homo sapiens |
| 9859   | centrosomal protein 170kDa                                             | Homo sapiens |
| 129787 | transmembrane protein 18                                               | Homo sapiens |
| 25896  | integrator complex subunit 7                                           | Homo sapiens |
| 284161 | glycerophosphodiester phosphodiesterase domain containing 1            | Homo sapiens |
| 23295  | mahogunin, ring finger 1                                               | Homo sapiens |
| 5894   | v-raf-1 murine leukemia viral oncogene homolog 1                       | Homo sapiens |
| 8851   | cyclin-dependent kinase 5, regulatory subunit 1 (p35)                  | Homo sapiens |
| 25814  | ataxin 10                                                              | Homo sapiens |
| 200185 | keratinocyte associated protein 2                                      | Homo sapiens |
| 148304 | chromosome 1 open reading frame 74                                     | Homo sapiens |
| 26578  | osteoclast stimulating factor 1                                        | Homo sapiens |
| 51341  | zinc finger and BTB domain containing 7A                               | Homo sapiens |
| 57415  | chromosome 3 open reading frame 14                                     | Homo sapiens |
| 79157  | major facilitator superfamily domain containing 11                     | Homo sapiens |
| 9815   | G protein-coupled receptor kinase interacting ArfGAP 2                 | Homo sapiens |
| 84545  | mitochondrial ribosomal protein L43                                    | Homo sapiens |
| 27020  | neuroplastin                                                           | Homo sapiens |
| 1482   | NK2 transcription factor related, locus 5 (Drosophila)                 | Homo sapiens |
| 253738 | early B-cell factor 3                                                  | Homo sapiens |
| 222255 | ataxin 7-like 1                                                        | Homo sapiens |
| 255488 | ring finger protein 144B                                               | Homo sapiens |
| 7516   | X-ray repair complementing defective repair in Chinese hamster cells 2 | Homo sapiens |
| 55692  | LUC7-like (S. cerevisiae)                                              | Homo sapiens |
| 8799   | peroxisomal biogenesis factor 11 beta                                  | Homo sapiens |
| 80224  | nucleotide binding protein-like                                        | Homo sapiens |
| 4430   | myosin IB                                                              | Homo sapiens |
| 10623  | polymerase (RNA) III (DNA directed) polypeptide C (62kD)               | Homo sapiens |
| 2958   | general transcription factor IIA, 2, 12kDa                             | Homo sapiens |
| 54542  | ring finger and CCCH-type zinc finger domains 2                        | Homo sapiens |
| 3708   | inositol 1,4,5-triphosphate receptor, type 1                           | Homo sapiens |
| 1029   | cyclin-dependent kinase inhibitor 2A (melanoma, p16, inhibits CDK4)    | Homo sapiens |
| 152815 | THAP domain containing 6                                               | Homo sapiens |
| 7580   | zinc finger protein 32                                                 | Homo sapiens |
| 8804   | cellular repressor of E1A-stimulated genes 1                           | Homo sapiens |
| 81706  | protein phosphatase 1, regulatory (inhibitor) subunit 14C              | Homo sapiens |
| 4524   | 5,10-methylenetetrahydrofolate reductase (NADPH)                       | Homo sapiens |
| 10112  | kinesin family member 20A                                              | Homo sapiens |
| 1854   | deoxyuridine triphosphatase                                            | Homo sapiens |
| 23234  | DnaJ (Hsp40) homolog, subfamily C, member 9                            | Homo sapiens |
| 253558 | lysocardiolipin acyltransferase 1                                      | Homo sapiens |
| 2717   | galactosidase, alpha                                                   | Homo sapiens |
| 23309  | SIN3 homolog B, transcription regulator (yeast)                        | Homo sapiens |
| 5719   | proteasome (prosome, macropain) 26S subunit, non-ATPase, 13            | Homo sapiens |
| 9994   | caspase 8 associated protein 2                                         | Homo sapiens |
| 9759   | histone deacetylase 4                                                  | Homo sapiens |
| 4601   | MAX interactor 1                                                       | Homo sapiens |
| 51747  | cisplatin resistance-associated overexpressed protein                  | Homo sapiens |
| 1387   | CREB binding protein                                                   | Homo sapiens |
| 5872   | RAB13, member RAS oncogene family; similar to hCG24991                 | Homo sapiens |
| 84302  | chromosome 9 open reading frame 125                                    | Homo sapiens |
| 55161  | transmembrane protein 33                                               | Homo sapiens |
| 83667  | sestrin 2                                                              | Homo sapiens |
| 440348 | nuclear pore complex interacting protein-like 2                        | Homo sapiens |
| 23067  | SET domain containing 1B                                               | Homo sapiens |
| 55280  | CWF19-like 1, cell cycle control (S. pombe)                            | Homo sapiens |

|        |                                                                                                                                                                                                                                                                 |              |
|--------|-----------------------------------------------------------------------------------------------------------------------------------------------------------------------------------------------------------------------------------------------------------------|--------------|
| 122809 | suppressor of cytokine signaling 4                                                                                                                                                                                                                              | Homo sapiens |
| 159371 | transmembrane protein 20                                                                                                                                                                                                                                        | Homo sapiens |
| 7337   | ubiquitin protein ligase E3A                                                                                                                                                                                                                                    | Homo sapiens |
| 27077  | B9 protein domain 1                                                                                                                                                                                                                                             | Homo sapiens |
| 9774   | similar to Bcl-2-associated transcription factor 1 (Btf); BCL2-associated transcription factor 1                                                                                                                                                                | Homo sapiens |
| 139322 | apolipoprotein O-like                                                                                                                                                                                                                                           | Homo sapiens |
| 9741   | lysosomal protein transmembrane 4 alpha                                                                                                                                                                                                                         | Homo sapiens |
| 9858   | KIAA0649                                                                                                                                                                                                                                                        | Homo sapiens |
| 84858  | zinc finger protein 503                                                                                                                                                                                                                                         | Homo sapiens |
| 376693 | ribosomal protein S10; ribosomal protein S10 pseudogene 4; ribosomal protein S10 pseudogene 11; ribosomal protein S10 pseudogene 22; ribosomal protein S10 pseudogene 7; ribosomal protein S10 pseudogene 13                                                    | Homo sapiens |
| 6204   | ribosomal protein S10; ribosomal protein S10 pseudogene 4; ribosomal protein S10 pseudogene 11; ribosomal protein S10 pseudogene 22; ribosomal protein S10 pseudogene 7; ribosomal protein S10 pseudogene 13                                                    | Homo sapiens |
| 2057   | erythropoietin receptor                                                                                                                                                                                                                                         | Homo sapiens |
| 11165  | nudix (nucleoside diphosphate linked moiety X)-type motif 3                                                                                                                                                                                                     | Homo sapiens |
| 10914  | poly(A) polymerase alpha                                                                                                                                                                                                                                        | Homo sapiens |
| 642869 | SET translocation (myeloid leukemia-associated) pseudogene                                                                                                                                                                                                      | Homo sapiens |
| 387263 | chromosome 6 open reading frame 120                                                                                                                                                                                                                             | Homo sapiens |
| 84456  | 1(3)mbt-like 3 (Drosophila)                                                                                                                                                                                                                                     | Homo sapiens |
| 253959 | GTPase activating Rap/RanGAP domain-like 1                                                                                                                                                                                                                      | Homo sapiens |
| 9403   | 15 kDa selenoprotein                                                                                                                                                                                                                                            | Homo sapiens |
| 80349  | WD repeat domain 61                                                                                                                                                                                                                                             | Homo sapiens |
| 57508  | integrator complex subunit 2                                                                                                                                                                                                                                    | Homo sapiens |
| 781    | calcium channel, voltage-dependent, alpha 2/delta subunit 1                                                                                                                                                                                                     | Homo sapiens |
| 26003  | golgi reassembly stacking protein 2, 55kDa                                                                                                                                                                                                                      | Homo sapiens |
| 26049  | family with sequence similarity 169, member A                                                                                                                                                                                                                   | Homo sapiens |
| 79719  | alpha- and gamma-adaptin-binding protein p34                                                                                                                                                                                                                    | Homo sapiens |
| 5428   | polymerase (DNA directed), gamma                                                                                                                                                                                                                                | Homo sapiens |
| 148362 | chromosome 1 open reading frame 58                                                                                                                                                                                                                              | Homo sapiens |
| 79086  | chromosome 19 open reading frame 42                                                                                                                                                                                                                             | Homo sapiens |
| 55632  | G2/M-phase specific E3 ubiquitin ligase                                                                                                                                                                                                                         | Homo sapiens |
| 55245  | ubiquinol-cytochrome c reductase complex chaperone                                                                                                                                                                                                              | Homo sapiens |
| 5911   | RAP2A, member of RAS oncogene family                                                                                                                                                                                                                            | Homo sapiens |
| 7064   | thimet oligopeptidase 1                                                                                                                                                                                                                                         | Homo sapiens |
| 221154 | EF-hand domain family, member A1                                                                                                                                                                                                                                | Homo sapiens |
| 3329   | heat shock 60kDa protein 1 (chaperonin) pseudogene 5; heat shock 60kDa protein 1 (chaperonin) pseudogene 6; heat shock 60kDa protein 1 (chaperonin) pseudogene 1; heat shock 60kDa protein 1 (chaperonin) pseudogene 4; heat shock 60kDa protein 1 (chaperonin) | Homo sapiens |
| 11057  | abhydrolase domain containing 2                                                                                                                                                                                                                                 | Homo sapiens |
| 55143  | cell division cycle associated 8                                                                                                                                                                                                                                | Homo sapiens |
| 22980  | transcription factor 25 (basic helix-loop-helix)                                                                                                                                                                                                                | Homo sapiens |
| 643836 | zinc finger protein 62 homolog (mouse)                                                                                                                                                                                                                          | Homo sapiens |
| 5610   | eukaryotic translation initiation factor 2-alpha kinase 2                                                                                                                                                                                                       | Homo sapiens |
| 6150   | mitochondrial ribosomal protein L23                                                                                                                                                                                                                             | Homo sapiens |
| 7991   | tumor suppressor candidate 3                                                                                                                                                                                                                                    | Homo sapiens |
| 148789 | beta-1,3-N-acetylgalactosaminyltransferase 2                                                                                                                                                                                                                    | Homo sapiens |
| 27106  | arrestin domain containing 2                                                                                                                                                                                                                                    | Homo sapiens |
| 9737   | G protein-coupled receptor associated sorting protein 1                                                                                                                                                                                                         | Homo sapiens |
| 11260  | exportin, tRNA (nuclear export receptor for tRNAs); similar to Exportin-T (tRNA exportin) (Exportin(tRNA))                                                                                                                                                      | Homo sapiens |
| 29928  | translocase of inner mitochondrial membrane 22 homolog (yeast)                                                                                                                                                                                                  | Homo sapiens |
| 3133   | major histocompatibility complex, class I, E                                                                                                                                                                                                                    | Homo sapiens |
| 79896  | threonine synthase-like 1 (S. cerevisiae)                                                                                                                                                                                                                       | Homo sapiens |
| 143187 | vesicle transport through interaction with t-SNAREs homolog 1A (yeast)                                                                                                                                                                                          | Homo sapiens |
| 10096  | ARP3 actin-related protein 3 homolog (yeast)                                                                                                                                                                                                                    | Homo sapiens |
| 824    | calpain 2, (m/II) large subunit                                                                                                                                                                                                                                 | Homo sapiens |
| 54704  | pyruvate dehydrogenase phosphatase catalytic subunit 1                                                                                                                                                                                                          | Homo sapiens |
| 80179  | myosin XIX                                                                                                                                                                                                                                                      | Homo sapiens |
| 23483  | TDP-glucose 4,6-dehydratase                                                                                                                                                                                                                                     | Homo sapiens |
| 56967  | chromosome 14 open reading frame 132                                                                                                                                                                                                                            | Homo sapiens |
| 6429   | splicing factor, arginine/serine-rich 4                                                                                                                                                                                                                         | Homo sapiens |
| 2683   | UDP-Gal:betaGlcNAc beta 1,4- galactosyltransferase, polypeptide 1                                                                                                                                                                                               | Homo sapiens |
| 5609   | mitogen-activated protein kinase kinase 7                                                                                                                                                                                                                       | Homo sapiens |
| 9592   | immediate early response 2                                                                                                                                                                                                                                      | Homo sapiens |
| 9821   | RB1-inducible coiled-coil 1                                                                                                                                                                                                                                     | Homo sapiens |
| 6119   | replication protein A3, 14kDa                                                                                                                                                                                                                                   | Homo sapiens |
| 55323  | La ribonucleoprotein domain family, member 6                                                                                                                                                                                                                    | Homo sapiens |
| 84520  | chromosome 14 open reading frame 142                                                                                                                                                                                                                            | Homo sapiens |
| 8895   | copine III                                                                                                                                                                                                                                                      | Homo sapiens |
| 158506 | zinc finger protein 645                                                                                                                                                                                                                                         | Homo sapiens |
| 7009   | transmembrane BAX inhibitor motif containing 6                                                                                                                                                                                                                  | Homo sapiens |
| 10479  | solute carrier family 9 (sodium/hydrogen exchanger), member 6                                                                                                                                                                                                   | Homo sapiens |
| 118924 | chromosome 10 open reading frame 4                                                                                                                                                                                                                              | Homo sapiens |

|        |                                                                                                                                                                                                                                |              |
|--------|--------------------------------------------------------------------------------------------------------------------------------------------------------------------------------------------------------------------------------|--------------|
| 10541  | similar to Acidic leucine-rich nuclear phosphoprotein 32 family member B (PHAPI2 protein) (Silver-stainable protein SSP29) (Acidic protein rich in leucines); acidic (leucine-rich) nuclear phosphoprotein 32 family, member B | Homo sapiens |
| 54799  | mbt domain containing 1                                                                                                                                                                                                        | Homo sapiens |
| 84311  | mitochondrial ribosomal protein L45                                                                                                                                                                                            | Homo sapiens |
| 7027   | transcription factor Dp-1                                                                                                                                                                                                      | Homo sapiens |
| 152100 | COX assembly mitochondrial protein homolog (S. cerevisiae)                                                                                                                                                                     | Homo sapiens |
| 8720   | membrane-bound transcription factor peptidase, site 1                                                                                                                                                                          | Homo sapiens |
| 4351   | mannose phosphate isomerase                                                                                                                                                                                                    | Homo sapiens |
| 51118  | UTP11-like, U3 small nucleolar ribonucleoprotein, (yeast)                                                                                                                                                                      | Homo sapiens |
| 1212   | clathrin, light chain (Lcb)                                                                                                                                                                                                    | Homo sapiens |
| 3418   | isocitrate dehydrogenase 2 (NADP+), mitochondrial                                                                                                                                                                              | Homo sapiens |
| 56922  | methylcrotonoyl-Coenzyme A carboxylase 1 (alpha)                                                                                                                                                                               | Homo sapiens |
| 57515  | serine incorporator 1                                                                                                                                                                                                          | Homo sapiens |
| 54553  | hypothetical protein DKFZP434I0714                                                                                                                                                                                             | Homo sapiens |
| 27429  | HtrA serine peptidase 2                                                                                                                                                                                                        | Homo sapiens |
| 387921 | NHL repeat containing 3                                                                                                                                                                                                        | Homo sapiens |
| 23390  | zinc finger, DHHC-type containing 17                                                                                                                                                                                           | Homo sapiens |
| 26097  | chromosome 1 open reading frame 77                                                                                                                                                                                             | Homo sapiens |
| 64422  | ATG3 autophagy related 3 homolog (S. cerevisiae)                                                                                                                                                                               | Homo sapiens |
| 6744   | sperm specific antigen 2                                                                                                                                                                                                       | Homo sapiens |
| 7444   | vaccinia related kinase 2                                                                                                                                                                                                      | Homo sapiens |
| 25798  | brain protein I3; brain protein I3 pseudogene 1                                                                                                                                                                                | Homo sapiens |
| 113174 | serum amyloid A-like 1                                                                                                                                                                                                         | Homo sapiens |
| 115209 | OMA1 homolog, zinc metallopeptidase (S. cerevisiae)                                                                                                                                                                            | Homo sapiens |
| 3201   | homeobox A4                                                                                                                                                                                                                    | Homo sapiens |
| 84068  | solute carrier family 10 (sodium/bile acid cotransporter family), member 7                                                                                                                                                     | Homo sapiens |
| 10671  | dynactin 6                                                                                                                                                                                                                     | Homo sapiens |
| 116154 | phosphatase and actin regulator 3                                                                                                                                                                                              | Homo sapiens |
| 9738   | CP110 protein                                                                                                                                                                                                                  | Homo sapiens |
| 23185  | La ribonucleoprotein domain family, member 4B                                                                                                                                                                                  | Homo sapiens |
| 6790   | aurora kinase A; aurora kinase A pseudogene 1                                                                                                                                                                                  | Homo sapiens |
| 554282 | family with sequence similarity 72, member C                                                                                                                                                                                   | Homo sapiens |
| 34     | acyl-Coenzyme A dehydrogenase, C-4 to C-12 straight chain                                                                                                                                                                      | Homo sapiens |
| 84838  | zinc finger protein 496                                                                                                                                                                                                        | Homo sapiens |
| 54906  | chromosome 10 open reading frame 18                                                                                                                                                                                            | Homo sapiens |
| 10175  | cornichon homolog (Drosophila)                                                                                                                                                                                                 | Homo sapiens |
| 6653   | sortilin-related receptor, L (DLR class) A repeats-containing                                                                                                                                                                  | Homo sapiens |
| 9088   | protein kinase, membrane associated tyrosine/threonine 1                                                                                                                                                                       | Homo sapiens |
| 79982  | DnaJ (Hsp40) homolog, subfamily B, member 14                                                                                                                                                                                   | Homo sapiens |
| 10283  | serologically defined colon cancer antigen 10                                                                                                                                                                                  | Homo sapiens |
| 5570   | protein kinase (cAMP-dependent, catalytic) inhibitor beta                                                                                                                                                                      | Homo sapiens |
| 5412   | ubiquitin-like 3                                                                                                                                                                                                               | Homo sapiens |
| 84859  | leucine-rich repeats and calponin homology (CH) domain containing 3                                                                                                                                                            | Homo sapiens |
| 57555  | neuroligin 2                                                                                                                                                                                                                   | Homo sapiens |
| 90161  | heparan sulfate 6-O-sulfotransferase 2                                                                                                                                                                                         | Homo sapiens |
| 51621  | Kruppel-like factor 13                                                                                                                                                                                                         | Homo sapiens |
| 27069  | growth hormone inducible transmembrane protein                                                                                                                                                                                 | Homo sapiens |
| 22897  | centrosomal protein 164kDa                                                                                                                                                                                                     | Homo sapiens |
| 27112  | family with sequence similarity 155, member B                                                                                                                                                                                  | Homo sapiens |
| 51155  | hematological and neurological expressed 1                                                                                                                                                                                     | Homo sapiens |
| 116442 | RAB39B, member RAS oncogene family                                                                                                                                                                                             | Homo sapiens |
| 7169   | tropomyosin 2 (beta)                                                                                                                                                                                                           | Homo sapiens |
| 3094   | histidine triad nucleotide binding protein 1                                                                                                                                                                                   | Homo sapiens |
| 113278 | chromosome 20 open reading frame 54                                                                                                                                                                                            | Homo sapiens |
| 54916  | chromosome 14 open reading frame 101                                                                                                                                                                                           | Homo sapiens |
| 26046  | ring finger protein 160                                                                                                                                                                                                        | Homo sapiens |
| 2764   | glia maturation factor, beta                                                                                                                                                                                                   | Homo sapiens |
| 221150 | chromosome 13 open reading frame 3                                                                                                                                                                                             | Homo sapiens |
| 4831   | non-metastatic cells 1, protein (NM23A) expressed in; NME1-NME2 readthrough transcript;                                                                                                                                        | Homo sapiens |
|        | non-metastatic cells 2, protein (NM23B) expressed in                                                                                                                                                                           |              |
| 4830   | non-metastatic cells 1, protein (NM23A) expressed in; NME1-NME2 readthrough transcript;                                                                                                                                        | Homo sapiens |
|        | non-metastatic cells 2, protein (NM23B) expressed in                                                                                                                                                                           |              |
| 654364 | non-metastatic cells 1, protein (NM23A) expressed in; NME1-NME2 readthrough transcript;                                                                                                                                        | Homo sapiens |
|        | non-metastatic cells 2, protein (NM23B) expressed in                                                                                                                                                                           |              |
| 55803  | ArfGAP with dual PH domains 2                                                                                                                                                                                                  | Homo sapiens |
| 727936 | glycosyltransferase 8 domain containing 4                                                                                                                                                                                      | Homo sapiens |
| 11161  | chromosome 14 open reading frame 1                                                                                                                                                                                             | Homo sapiens |
| 10121  | ARPI actin-related protein 1 homolog A, contractin alpha (yeast)                                                                                                                                                               | Homo sapiens |
| 9860   | leucine-rich repeats and immunoglobulin-like domains 2                                                                                                                                                                         | Homo sapiens |
| 26297  | secretion regulating guanine nucleotide exchange factor                                                                                                                                                                        | Homo sapiens |
| 57541  | zinc finger protein 398                                                                                                                                                                                                        | Homo sapiens |
| 8613   | phosphatidic acid phosphatase type 2B                                                                                                                                                                                          | Homo sapiens |
| 116984 | ArfGAP with RhoGAP domain, ankyrin repeat and PH domain 2                                                                                                                                                                      | Homo sapiens |
| 10006  | abl-interactor 1                                                                                                                                                                                                               | Homo sapiens |
| 10652  | YKT6 v-SNARE homolog (S. cerevisiae)                                                                                                                                                                                           | Homo sapiens |
| 401466 | chromosome 8 open reading frame 59                                                                                                                                                                                             | Homo sapiens |

|           |                                                                                                                                                                                     |              |
|-----------|-------------------------------------------------------------------------------------------------------------------------------------------------------------------------------------|--------------|
| 23117     | nuclear pore complex interacting protein-like 3; similar to Uncharacterized protein KIAA0220                                                                                        | Homo sapiens |
| 100132247 | nuclear pore complex interacting protein-like 3; similar to Uncharacterized protein KIAA0220                                                                                        | Homo sapiens |
| 6772      | signal transducer and activator of transcription 1, 91kDa                                                                                                                           | Homo sapiens |
| 26267     | F-box protein 10                                                                                                                                                                    | Homo sapiens |
| 8454      | cullin 1                                                                                                                                                                            | Homo sapiens |
| 201895    | chromosome 4 open reading frame 34                                                                                                                                                  | Homo sapiens |
| 100127983 | hypothetical protein LOC100127983                                                                                                                                                   | Homo sapiens |
| 51503     | CWC15 spliceosome-associated protein homolog (S. cerevisiae)                                                                                                                        | Homo sapiens |
| 95681     | testis specific, 14                                                                                                                                                                 | Homo sapiens |
| 8624      | proteasome (prosome, macropain) assembly chaperone 1                                                                                                                                | Homo sapiens |
| 342371    | ataxin 1-like                                                                                                                                                                       | Homo sapiens |
| 64762     | hypothetical protein LOC100130616; family with sequence similarity 59, member A                                                                                                     | Homo sapiens |
| 29101     | SSU72 RNA polymerase II CTD phosphatase homolog (S. cerevisiae)                                                                                                                     | Homo sapiens |
| 29058     | hypothetical LOC642975; chromosome 20 open reading frame 30                                                                                                                         | Homo sapiens |
| 1545      | cytochrome P450, family 1, subfamily B, polypeptide 1                                                                                                                               | Homo sapiens |
| 10057     | ATP-binding cassette, sub-family C (CFTR/MRP), member 5                                                                                                                             | Homo sapiens |
| 64844     | membrane-associated ring finger (C3HC4) 7                                                                                                                                           | Homo sapiens |
| 10598     | AHA1, activator of heat shock 90kDa protein ATPase homolog 1 (yeast)                                                                                                                | Homo sapiens |
| 8411      | early endosome antigen 1                                                                                                                                                            | Homo sapiens |
| 23406     | coactosin-like 1 (Dictyostelium)                                                                                                                                                    | Homo sapiens |
| 864       | runt-related transcription factor 3                                                                                                                                                 | Homo sapiens |
| 64417     | chromosome 5 open reading frame 28                                                                                                                                                  | Homo sapiens |
| 84925     | disrupted in renal carcinoma 2                                                                                                                                                      | Homo sapiens |
| 4774      | nuclear factor I/A                                                                                                                                                                  | Homo sapiens |
| 1650      | dolichyl-diphosphooligosaccharide-protein glycosyltransferase                                                                                                                       | Homo sapiens |
| 6256      | retinoid X receptor, alpha                                                                                                                                                          | Homo sapiens |
| 6675      | UDP-N-acetylglucosamine pyrophosphorylase 1                                                                                                                                         | Homo sapiens |
| 64781     | ceramide kinase                                                                                                                                                                     | Homo sapiens |
| 9921      | ring finger protein 10                                                                                                                                                              | Homo sapiens |
| 25851     | tectonin beta-propeller repeat containing 1                                                                                                                                         | Homo sapiens |
| 388650    | family with sequence similarity 69, member A                                                                                                                                        | Homo sapiens |
| 6253      | reticulon 2                                                                                                                                                                         | Homo sapiens |
| 51575     | similar to ABT1-associated protein; ESF1, nucleolar pre-rRNA processing protein, homolog (S. cerevisiae)                                                                            | Homo sapiens |
| 51278     | immediate early response 5                                                                                                                                                          | Homo sapiens |
| 160857    | coiled-coil domain containing 122                                                                                                                                                   | Homo sapiens |
| 54543     | translocase of outer mitochondrial membrane 7 homolog (yeast)                                                                                                                       | Homo sapiens |
| 53354     | pantothenate kinase 1                                                                                                                                                               | Homo sapiens |
| 1072      | cofilin 1 (non-muscle)                                                                                                                                                              | Homo sapiens |
| 80018     | chromosome 12 open reading frame 30                                                                                                                                                 | Homo sapiens |
| 10745     | putative homeodomain transcription factor 1                                                                                                                                         | Homo sapiens |
| 367       | androgen receptor                                                                                                                                                                   | Homo sapiens |
| 8218      | clathrin, heavy chain-like 1                                                                                                                                                        | Homo sapiens |
| 79018     | chromosome 17 open reading frame 39                                                                                                                                                 | Homo sapiens |
| 54556     | inhibitor of growth family, member 3                                                                                                                                                | Homo sapiens |
| 4697      | NADH dehydrogenase (ubiquinone) 1 alpha subcomplex, 4, 9kDa                                                                                                                         | Homo sapiens |
| 23315     | solute carrier family 9 (sodium/hydrogen exchanger), member 8                                                                                                                       | Homo sapiens |
| 23347     | structural maintenance of chromosomes flexible hinge domain containing 1                                                                                                            | Homo sapiens |
| 84661     | dpy-30 homolog (C. elegans)                                                                                                                                                         | Homo sapiens |
| 51406     | nucleolar protein 7, 27kDa                                                                                                                                                          | Homo sapiens |
| 260294    | NOL1/NOP2/Sun domain family, member 5C                                                                                                                                              | Homo sapiens |
| 11011     | tousled-like kinase 2                                                                                                                                                               | Homo sapiens |
| 84210     | hCG2042718; chromosome 21 open reading frame 81; ankyrin repeat domain 20 family, member A1; ankyrin repeat domain 20 family, member A3; ankyrin repeat domain 20 family, member A2 | Homo sapiens |
| 441430    | hCG2042718; chromosome 21 open reading frame 81; ankyrin repeat domain 20 family, member A1; ankyrin repeat domain 20 family, member A3; ankyrin repeat domain 20 family, member A2 | Homo sapiens |
| 441425    | hCG2042718; chromosome 21 open reading frame 81; ankyrin repeat domain 20 family, member A1; ankyrin repeat domain 20 family, member A3; ankyrin repeat domain 20 family, member A2 | Homo sapiens |
| 391267    | hCG2042718; chromosome 21 open reading frame 81; ankyrin repeat domain 20 family, member A1; ankyrin repeat domain 20 family, member A3; ankyrin repeat domain 20 family, member A2 | Homo sapiens |
| 6397      | SEC14-like 1 (S. cerevisiae); SEC14-like 1 pseudogene                                                                                                                               | Homo sapiens |
| 1982      | eukaryotic translation initiation factor 4 gamma, 2                                                                                                                                 | Homo sapiens |
| 122830    | N-acetyltransferase 12 (GCN5-related, putative)                                                                                                                                     | Homo sapiens |
| 28998     | mitochondrial ribosomal protein L13                                                                                                                                                 | Homo sapiens |
| 8535      | chromobox homolog 4 (Pc class homolog, Drosophila)                                                                                                                                  | Homo sapiens |
| 382       | ADP-ribosylation factor 6                                                                                                                                                           | Homo sapiens |
| 7494      | X-box binding protein 1                                                                                                                                                             | Homo sapiens |
| 79649     | MAP7 domain containing 3                                                                                                                                                            | Homo sapiens |
| 23122     | cytoplasmic linker associated protein 2                                                                                                                                             | Homo sapiens |
| 10475     | tripartite motif-containing 38                                                                                                                                                      | Homo sapiens |
| 8892      | eukaryotic translation initiation factor 2B, subunit 2 beta, 39kDa                                                                                                                  | Homo sapiens |

|           |                                                                                                                                                    |              |
|-----------|----------------------------------------------------------------------------------------------------------------------------------------------------|--------------|
| 389677    | RNA binding motif protein 12B                                                                                                                      | Homo sapiens |
| 79109     | mitogen-activated protein kinase associated protein 1                                                                                              | Homo sapiens |
| 55450     | calcium/calmodulin-dependent protein kinase II inhibitor 1                                                                                         | Homo sapiens |
| 729453    | PMS2 postmeiotic segregation increased 2 ( <i>S. cerevisiae</i> )-like                                                                             | Homo sapiens |
| 488       | ATPase, Ca <sup>++</sup> transporting, cardiac muscle, slow twitch 2                                                                               | Homo sapiens |
| 29780     | parvin, beta                                                                                                                                       | Homo sapiens |
| 100049716 | hypothetical protein LOC100049716                                                                                                                  | Homo sapiens |
| 64777     | required for meiotic nuclear division 5 homolog B ( <i>S. cerevisiae</i> )                                                                         | Homo sapiens |
| 1445      | c-src tyrosine kinase                                                                                                                              | Homo sapiens |
| 79932     | KIAA0319-like                                                                                                                                      | Homo sapiens |
| 55544     | RNA binding motif protein 38                                                                                                                       | Homo sapiens |
| 4094      | v-maf musculoaponeurotic fibrosarcoma oncogene homolog (avian)                                                                                     | Homo sapiens |
| 22827     | poly-U binding splicing factor 60KDa                                                                                                               | Homo sapiens |
| 114882    | oxysterol binding protein-like 8                                                                                                                   | Homo sapiens |
| 143903    | layilin                                                                                                                                            | Homo sapiens |
| 54808     | dymeclin                                                                                                                                           | Homo sapiens |
| 56478     | eukaryotic translation initiation factor 4E nuclear import factor 1                                                                                | Homo sapiens |
| 51663     | zinc finger RNA binding protein                                                                                                                    | Homo sapiens |
| 79596     | ring finger protein 219                                                                                                                            | Homo sapiens |
| 11179     | zinc finger protein 277                                                                                                                            | Homo sapiens |
| 391356    | chromosome 2 open reading frame 79                                                                                                                 | Homo sapiens |
| 91746     | YTH domain containing 1                                                                                                                            | Homo sapiens |
| 339803    | hypothetical protein LOC339803                                                                                                                     | Homo sapiens |
| 140690    | CCCTC-binding factor (zinc finger protein)-like                                                                                                    | Homo sapiens |
| 323       | amyloid beta (A4) precursor protein-binding, family B, member 2                                                                                    | Homo sapiens |
| 4747      | neurofilament, light polypeptide                                                                                                                   | Homo sapiens |
| 51720     | ubiquitin interaction motif containing 1                                                                                                           | Homo sapiens |
| 7520      | X-ray repair complementing defective repair in Chinese hamster cells 5 (double-strand-break rejoining)                                             | Homo sapiens |
| 677778    | small Cajal body-specific RNA 15                                                                                                                   | Homo sapiens |
| 10098     | tetraspanin 5                                                                                                                                      | Homo sapiens |
| 6788      | serine/threonine kinase 3 (STE20 homolog, yeast)                                                                                                   | Homo sapiens |
| 83593     | Ras association (RalGDS/AF-6) domain family member 5                                                                                               | Homo sapiens |
| 22861     | NLR family, pyrin domain containing 1                                                                                                              | Homo sapiens |
| 900       | cyclin G1                                                                                                                                          | Homo sapiens |
| 9949      | Alport syndrome, mental retardation, midface hypoplasia and elliptocytosis chromosomal region gene 1                                               | Homo sapiens |
| 10972     | transmembrane emp24-like trafficking protein 10 (yeast)                                                                                            | Homo sapiens |
| 83737     | itchy E3 ubiquitin protein ligase homolog (mouse)                                                                                                  | Homo sapiens |
| 10048     | RAN binding protein 9                                                                                                                              | Homo sapiens |
| 8225      | GTP binding protein 6 (putative)                                                                                                                   | Homo sapiens |
| 83540     | NUF2, NDC80 kinetochore complex component, homolog ( <i>S. cerevisiae</i> )                                                                        | Homo sapiens |
| 404266    | hypothetical LOC404266                                                                                                                             | Homo sapiens |
| 26502     | nuclear prelamin A recognition factor                                                                                                              | Homo sapiens |
| 7574      | zinc finger protein 26                                                                                                                             | Homo sapiens |
| 10983     | cyclin I                                                                                                                                           | Homo sapiens |
| 23534     | transportin 3                                                                                                                                      | Homo sapiens |
| 3988      | lipase A, lysosomal acid, cholesterol esterase                                                                                                     | Homo sapiens |
| 57570     | TRM5 tRNA methyltransferase 5 homolog ( <i>S. cerevisiae</i> )                                                                                     | Homo sapiens |
| 25853     | WD repeat domain 40A                                                                                                                               | Homo sapiens |
| 79866     | chromosome 13 open reading frame 34                                                                                                                | Homo sapiens |
| 2778      | GNAS complex locus                                                                                                                                 | Homo sapiens |
| 81545     | F-box protein 38                                                                                                                                   | Homo sapiens |
| 128308    | mitochondrial ribosomal protein L55                                                                                                                | Homo sapiens |
| 10975     | ubiquinol-cytochrome c reductase, 6.4kDa subunit                                                                                                   | Homo sapiens |
| 2619      | growth arrest-specific 1                                                                                                                           | Homo sapiens |
| 57609     | DIP2 disco-interacting protein 2 homolog B ( <i>Drosophila</i> )                                                                                   | Homo sapiens |
| 29083     | GTP-binding protein 8 (putative)                                                                                                                   | Homo sapiens |
| 7572      | zinc finger protein 24                                                                                                                             | Homo sapiens |
| 51637     | chromosome 14 open reading frame 166                                                                                                               | Homo sapiens |
| 51517     | NCK interacting protein with SH3 domain                                                                                                            | Homo sapiens |
| 63941     | N-terminal EF-hand calcium binding protein 3                                                                                                       | Homo sapiens |
| 2770      | guanine nucleotide binding protein (G protein), alpha inhibiting activity polypeptide 1                                                            | Homo sapiens |
| 6526      | solute carrier family 5 (sodium/myo-inositol cotransporter), member 3                                                                              | Homo sapiens |
| 84321     | similar to THO complex 3; THO complex 3                                                                                                            | Homo sapiens |
| 728554    | similar to THO complex 3; THO complex 3                                                                                                            | Homo sapiens |
| 10396     | ATPase, aminophospholipid transporter (APLT), class I, type 8A, member 1                                                                           | Homo sapiens |
| 3215      | homeobox B5                                                                                                                                        | Homo sapiens |
| 2644      | GTP cyclohydrolase I feedback regulator                                                                                                            | Homo sapiens |
| 11039     | glucuronidase, beta pseudogene                                                                                                                     | Homo sapiens |
| 3021      | H3 histone, family 3B (H3.3B); H3 histone, family 3A pseudogene; H3 histone, family 3A; similar to H3 histone, family 3B; similar to histone H3.3B | Homo sapiens |
| 440926    | H3 histone, family 3B (H3.3B); H3 histone, family 3A pseudogene; H3 histone, family 3A; similar to H3 histone, family 3B; similar to histone H3.3B | Homo sapiens |
| 3020      | H3 histone, family 3B (H3.3B); H3 histone, family 3A pseudogene; H3 histone, family 3A; similar to H3 histone, family 3B; similar to histone H3.3B | Homo sapiens |
| 738       | chromosome 11 open reading frame2                                                                                                                  | Homo sapiens |



|        |                                                                                                                                                                              |              |
|--------|------------------------------------------------------------------------------------------------------------------------------------------------------------------------------|--------------|
| 583    | Bardet-Biedl syndrome 2                                                                                                                                                      | Homo sapiens |
| 29934  | sorting nexin 12                                                                                                                                                             | Homo sapiens |
| 143884 | CWF19-like 2, cell cycle control (S. pombe)                                                                                                                                  | Homo sapiens |
| 55212  | Bardet-Biedl syndrome 7                                                                                                                                                      | Homo sapiens |
| 132321 | chromosome 4 open reading frame 33                                                                                                                                           | Homo sapiens |
| 5879   | ras-related C3 botulinum toxin substrate 1 (rho family, small GTP binding protein Rac1)                                                                                      | Homo sapiens |
| 5862   | RAB2A, member RAS oncogene family                                                                                                                                            | Homo sapiens |
| 57763  | ankyrin repeat, family A (RFXANK-like), 2                                                                                                                                    | Homo sapiens |
| 147184 | transmembrane protein 99                                                                                                                                                     | Homo sapiens |
| 6446   | serum/glucocorticoid regulated kinase 1                                                                                                                                      | Homo sapiens |
| 140460 | ankyrin repeat and SOCS box-containing 7                                                                                                                                     | Homo sapiens |
| 26136  | testis derived transcript (3 LIM domains)                                                                                                                                    | Homo sapiens |
| 23760  | phosphatidylinositol transfer protein, beta                                                                                                                                  | Homo sapiens |
| 118    | adducin 1 (alpha)                                                                                                                                                            | Homo sapiens |
| 165324 | UBX domain protein 2A                                                                                                                                                        | Homo sapiens |
| 22937  | SREBF chaperone                                                                                                                                                              | Homo sapiens |
| 6230   | ribosomal protein S25 pseudogene 8; ribosomal protein S25                                                                                                                    | Homo sapiens |
| 23093  | tubulin tyrosine ligase-like family, member 5                                                                                                                                | Homo sapiens |
| 23261  | calmodulin binding transcription activator 1                                                                                                                                 | Homo sapiens |
| 3014   | H2A histone family, member X                                                                                                                                                 | Homo sapiens |
| 1937   | eukaryotic translation elongation factor 1 gamma                                                                                                                             | Homo sapiens |
| 4001   | lamin B1                                                                                                                                                                     | Homo sapiens |
| 7855   | frizzled homolog 5 (Drosophila)                                                                                                                                              | Homo sapiens |
| 2296   | forkhead box C1                                                                                                                                                              | Homo sapiens |
| 2495   | ferritin, heavy polypeptide 1; ferritin, heavy polypeptide-like 16; similar to ferritin, heavy polypeptide 1; ferritin, heavy polypeptide-like 3 pseudogene                  | Homo sapiens |
| 81929  | SEH1-like (S. cerevisiae)                                                                                                                                                    | Homo sapiens |
| 54830  | nucleoporin 62kDa C-terminal like                                                                                                                                            | Homo sapiens |
| 11345  | GABA(A) receptor-associated protein-like 2                                                                                                                                   | Homo sapiens |
| 23633  | karyopherin alpha 6 (importin alpha 7)                                                                                                                                       | Homo sapiens |
| 8204   | nuclear receptor interacting protein 1                                                                                                                                       | Homo sapiens |
| 4716   | NADH dehydrogenase (ubiquinone) 1 beta subcomplex, 10, 22kDa                                                                                                                 | Homo sapiens |
| 253143 | chromosome 22 open reading frame 30                                                                                                                                          | Homo sapiens |
| 23590  | prenyl (decaprenyl) diphosphate synthase, subunit 1                                                                                                                          | Homo sapiens |
| 92342  | chromosome 1 open reading frame 156                                                                                                                                          | Homo sapiens |
| 205251 | non-protein coding RNA 116                                                                                                                                                   | Homo sapiens |
| 51390  | androgen-induced 1                                                                                                                                                           | Homo sapiens |
| 29070  | coiled-coil domain containing 113                                                                                                                                            | Homo sapiens |
| 91663  | myeloid-associated differentiation marker                                                                                                                                    | Homo sapiens |
| 8428   | serine/threonine kinase 24 (STE20 homolog, yeast)                                                                                                                            | Homo sapiens |
| 659    | bone morphogenetic protein receptor, type II (serine/threonine kinase)                                                                                                       | Homo sapiens |
| 890    | cyclin A2                                                                                                                                                                    | Homo sapiens |
| 2002   | ELK1, member of ETS oncogene family                                                                                                                                          | Homo sapiens |
| 662    | BCL2/adenovirus E1B 19kDa interacting protein 1                                                                                                                              | Homo sapiens |
| 51119  | Shwachman-Bodian-Diamond syndrome pseudogene; Shwachman-Bodian-Diamond syndrome                                                                                              | Homo sapiens |
| 155370 | Shwachman-Bodian-Diamond syndrome pseudogene; Shwachman-Bodian-Diamond syndrome                                                                                              | Homo sapiens |
| 728658 | ribosomal protein L13a pseudogene 7; ribosomal protein L13a pseudogene 5; ribosomal protein L13a pseudogene 16; ribosomal protein L13a; ribosomal protein L13a pseudogene 18 | Homo sapiens |
| 23521  | ribosomal protein L13a pseudogene 7; ribosomal protein L13a pseudogene 5; ribosomal protein L13a pseudogene 16; ribosomal protein L13a; ribosomal protein L13a pseudogene 18 | Homo sapiens |
| 51202  | DEAD (Asp-Glu-Ala-Asp) box polypeptide 47                                                                                                                                    | Homo sapiens |
| 9905   | small G protein signaling modulator 2                                                                                                                                        | Homo sapiens |
| 11049  | YDD19 protein                                                                                                                                                                | Homo sapiens |
| 1836   | solute carrier family 26 (sulfate transporter), member 2                                                                                                                     | Homo sapiens |
| 144577 | chromosome 12 open reading frame 66                                                                                                                                          | Homo sapiens |
| 5584   | protein kinase C, iota                                                                                                                                                       | Homo sapiens |
| 5705   | proteasome (prosome, macropain) 26S subunit, ATPase, 5                                                                                                                       | Homo sapiens |
| 51264  | mitochondrial ribosomal protein L27                                                                                                                                          | Homo sapiens |
| 587    | branched chain aminotransferase 2, mitochondrial                                                                                                                             | Homo sapiens |
| 127018 | lysophospholipase-like 1                                                                                                                                                     | Homo sapiens |
| 65999  | leucine rich repeat containing 61                                                                                                                                            | Homo sapiens |
| 6133   | ribosomal protein L9; ribosomal protein L9 pseudogene 25                                                                                                                     | Homo sapiens |
| 8031   | nuclear receptor coactivator 4                                                                                                                                               | Homo sapiens |
| 84938  | ATG4 autophagy related 4 homolog C (S. cerevisiae)                                                                                                                           | Homo sapiens |
| 8861   | LIM domain binding 1                                                                                                                                                         | Homo sapiens |
| 9841   | zinc finger and BTB domain containing 24                                                                                                                                     | Homo sapiens |
| 3628   | inositol polyphosphate-1-phosphatase                                                                                                                                         | Homo sapiens |
| 56954  | nitrilase family, member 2                                                                                                                                                   | Homo sapiens |
| 8872   | cell division cycle 123 homolog (S. cerevisiae)                                                                                                                              | Homo sapiens |
| 5125   | proprotein convertase subtilisin/kexin type 5                                                                                                                                | Homo sapiens |
| 85377  | MICAL-like 1                                                                                                                                                                 | Homo sapiens |
| 84923  | family with sequence similarity 104, member A                                                                                                                                | Homo sapiens |
| 221294 | 5'-nucleotidase domain containing 1                                                                                                                                          | Homo sapiens |
| 9202   | zinc finger, MYM-type 4                                                                                                                                                      | Homo sapiens |
| 162681 | chromosome 18 open reading frame 54                                                                                                                                          | Homo sapiens |
| 284058 | KIAA1267                                                                                                                                                                     | Homo sapiens |
| 25901  | coiled-coil domain containing 28A                                                                                                                                            | Homo sapiens |

|           |                                                                                                                                            |              |
|-----------|--------------------------------------------------------------------------------------------------------------------------------------------|--------------|
| 23362     | pleckstrin and Sec7 domain containing 3                                                                                                    | Homo sapiens |
| 55863     | transmembrane protein 126B                                                                                                                 | Homo sapiens |
| 6925      | transcription factor 4                                                                                                                     | Homo sapiens |
| 145748    | LysM, putative peptidoglycan-binding, domain containing 4                                                                                  | Homo sapiens |
| 163126    | EP300 interacting inhibitor of differentiation 2                                                                                           | Homo sapiens |
| 10421     | CD2 (cytoplasmic tail) binding protein 2                                                                                                   | Homo sapiens |
| 6782      | heat shock protein 70kDa family, member 13                                                                                                 | Homo sapiens |
| 54751     | filamin binding LIM protein 1                                                                                                              | Homo sapiens |
| 81579     | phospholipase A2, group X1IA                                                                                                               | Homo sapiens |
| 51326     | ADP-ribosylation factor-like 17 pseudogene 1; ADP-ribosylation factor-like 17                                                              | Homo sapiens |
| 10428     | craniofacial development protein 1                                                                                                         | Homo sapiens |
| 4756      | neogenin homolog 1 (chicken)                                                                                                               | Homo sapiens |
| 10749     | kinesin family member 1C                                                                                                                   | Homo sapiens |
| 201164    | phospholipase D family, member 6                                                                                                           | Homo sapiens |
| 3954      | leucine zipper-EF-hand containing transmembrane protein 1                                                                                  | Homo sapiens |
| 9978      | ring-box 1                                                                                                                                 | Homo sapiens |
| 10961     | endoplasmic reticulum protein 29                                                                                                           | Homo sapiens |
| 6929      | transcription factor 3 (E2A immunoglobulin enhancer binding factors E12/E47)                                                               | Homo sapiens |
| 9670      | importin 13                                                                                                                                | Homo sapiens |
| 79602     | adiponectin receptor 2                                                                                                                     | Homo sapiens |
| 9668      | zinc finger protein 432                                                                                                                    | Homo sapiens |
| 9647      | protein phosphatase 1F (PP2C domain containing)                                                                                            | Homo sapiens |
| 100132356 | hypothetical protein LOC100132356                                                                                                          | Homo sapiens |
| 7182      | nuclear receptor subfamily 2, group C, member 2                                                                                            | Homo sapiens |
| 389765    | similar to KIF27C                                                                                                                          | Homo sapiens |
| 5783      | protein tyrosine phosphatase, non-receptor type 13 (APO-1/CD95 (Fas)-associated phosphatase)                                               | Homo sapiens |
| 254170    | F-box protein 33                                                                                                                           | Homo sapiens |
| 26175     | chromosome 14 open reading frame 109                                                                                                       | Homo sapiens |
| 27250     | programmed cell death 4 (neoplastic transformation inhibitor)                                                                              | Homo sapiens |
| 23678     | serum/glucocorticoid regulated kinase family, member 3                                                                                     | Homo sapiens |
| 92806     | hypothetical protein MGC16385                                                                                                              | Homo sapiens |
| 55700     | MAP7 domain containing 1                                                                                                                   | Homo sapiens |
| 6322      | sex comb on midleg-like 1 (Drosophila)                                                                                                     | Homo sapiens |
| 728661    | similar to solute carrier family 35, member E2                                                                                             | Homo sapiens |
| 94103     | ORM1-like 3 (S. cerevisiae)                                                                                                                | Homo sapiens |
| 26001     | ring finger protein 167                                                                                                                    | Homo sapiens |
| 55527     | fem-1 homolog a (C. elegans); similar to fem-1 homolog a (C.elegans); similar to fem-1 homolog a                                           | Homo sapiens |
| 8504      | peroxisomal biogenesis factor 3                                                                                                            | Homo sapiens |
| 5795      | protein tyrosine phosphatase, receptor type, J                                                                                             | Homo sapiens |
| 5015      | orthodenticle homeobox 2                                                                                                                   | Homo sapiens |
| 3198      | homeobox A1                                                                                                                                | Homo sapiens |
| 200576    | phosphoinositide kinase, FYVE finger containing                                                                                            | Homo sapiens |
| 4361      | MRE11 meiotic recombination 11 homolog A (S. cerevisiae)                                                                                   | Homo sapiens |
| 25994     | similar to HIG1 domain family, member 1A; HIG1 hypoxia inducible domain family, member 1A; HIG1 hypoxia inducible domain family, member 1D | Homo sapiens |
| 23176     | septin 8                                                                                                                                   | Homo sapiens |
| 23286     | WW and C2 domain containing 1                                                                                                              | Homo sapiens |
| 22894     | DIS3 mitotic control homolog (S. cerevisiae)                                                                                               | Homo sapiens |
| 253782    | LAG1 homolog, ceramide synthase 6                                                                                                          | Homo sapiens |
| 79828     | methyltransferase like 8                                                                                                                   | Homo sapiens |
| 221830    | TWIST neighbor                                                                                                                             | Homo sapiens |
| 8034      | solute carrier family 25 (mitochondrial carrier; Graves disease autoantigen), member 16                                                    | Homo sapiens |
| 7705      | zinc finger protein 146                                                                                                                    | Homo sapiens |
| 22929     | selenophosphate synthetase 1; similar to selenophosphate synthetase 1                                                                      | Homo sapiens |
| 7170      | tropomyosin 3                                                                                                                              | Homo sapiens |
| 117247    | solute carrier family 16, member 10 (aromatic amino acid transporter)                                                                      | Homo sapiens |
| 7511      | X-prolyl aminopeptidase (aminopeptidase P) 1, soluble                                                                                      | Homo sapiens |
| 84081     | coiled-coil domain containing 55                                                                                                           | Homo sapiens |
| 83699     | SH3 domain binding glutamic acid-rich protein like 2                                                                                       | Homo sapiens |
| 196294    | IMP1 inner mitochondrial membrane peptidase-like (S. cerevisiae)                                                                           | Homo sapiens |
| 5501      | protein phosphatase 1, catalytic subunit, gamma isoform                                                                                    | Homo sapiens |
| 55116     | transmembrane protein 39B                                                                                                                  | Homo sapiens |
| 55783     | FtsJ methyltransferase domain containing 1                                                                                                 | Homo sapiens |
| 51100     | SH3-domain GRB2-like endophilin B1                                                                                                         | Homo sapiens |
| 3654      | interleukin-1 receptor-associated kinase 1                                                                                                 | Homo sapiens |
| 9812      | KIAA0141                                                                                                                                   | Homo sapiens |
| 6142      | ribosomal protein L18a pseudogene 6; ribosomal protein L18a                                                                                | Homo sapiens |
| 842       | caspase 9, apoptosis-related cysteine peptidase                                                                                            | Homo sapiens |
| 10525     | hypoxia up-regulated 1                                                                                                                     | Homo sapiens |
| 8487      | survival of motor neuron protein interacting protein 1                                                                                     | Homo sapiens |
| 9667      | scaffold attachment factor B2                                                                                                              | Homo sapiens |
| 6934      | transcription factor 7-like 2 (T-cell specific, HMG-box)                                                                                   | Homo sapiens |
| 6416      | mitogen-activated protein kinase kinase 4                                                                                                  | Homo sapiens |
| 7728      | zinc finger protein 175                                                                                                                    | Homo sapiens |
| 1912      | polyhomeotic homolog 2 (Drosophila)                                                                                                        | Homo sapiens |

|        |                                                                                                                                                                                   |              |
|--------|-----------------------------------------------------------------------------------------------------------------------------------------------------------------------------------|--------------|
| 203286 | ankyrin repeat and sterile alpha motif domain containing 6                                                                                                                        | Homo sapiens |
| 400    | ADP-ribosylation factor-like 1                                                                                                                                                    | Homo sapiens |
| 10723  | solute carrier family 12 (potassium/chloride transporters), member 7                                                                                                              | Homo sapiens |
| 57511  | component of oligomeric golgi complex 6                                                                                                                                           | Homo sapiens |
| 55165  | centrosomal protein 55kDa                                                                                                                                                         | Homo sapiens |
| 57862  | zinc finger protein 410                                                                                                                                                           | Homo sapiens |
| 388722 | chromosome 1 open reading frame 53                                                                                                                                                | Homo sapiens |
| 6992   | protein phosphatase 1, regulatory (inhibitor) subunit 11                                                                                                                          | Homo sapiens |
| 23463  | isoprenylcysteine carboxyl methyltransferase                                                                                                                                      | Homo sapiens |
| 5599   | mitogen-activated protein kinase 8                                                                                                                                                | Homo sapiens |
| 2671   | growth factor, augments liver regeneration                                                                                                                                        | Homo sapiens |
| 5690   | proteasome (prosome, macropain) subunit, beta type, 2                                                                                                                             | Homo sapiens |
| 10362  | high-mobility group 20B                                                                                                                                                           | Homo sapiens |
| 56950  | SET and MYND domain containing 2                                                                                                                                                  | Homo sapiens |
| 6453   | intersectin 1 (SH3 domain protein)                                                                                                                                                | Homo sapiens |
| 22976  | PAX interacting (with transcription-activation domain) protein 1                                                                                                                  | Homo sapiens |
| 8819   | Sin3A-associated protein, 30kDa                                                                                                                                                   | Homo sapiens |
| 390535 | golgi autoantigen, golgin subfamily a, 8E                                                                                                                                         | Homo sapiens |
| 285148 | isoamyl acetate-hydrolyzing esterase 1 homolog (S. cerevisiae)                                                                                                                    | Homo sapiens |
| 339983 | N-acetyltransferase 8-like (GCN5-related, putative)                                                                                                                               | Homo sapiens |
| 7626   | zinc finger protein 75D                                                                                                                                                           | Homo sapiens |
| 2045   | EPH receptor A7                                                                                                                                                                   | Homo sapiens |
| 254042 | methionine aminopeptidase 1D                                                                                                                                                      | Homo sapiens |
| 58490  | regulation of nuclear pre-mRNA domain containing 1B                                                                                                                               | Homo sapiens |
| 4189   | DnaJ (Hsp40) homolog, subfamily B, member 9                                                                                                                                       | Homo sapiens |
| 255252 | leucine rich repeat containing 57                                                                                                                                                 | Homo sapiens |
| 79754  | ankyrin repeat and SOCS box-containing 13                                                                                                                                         | Homo sapiens |
| 137964 | 1-acylglycerol-3-phosphate O-acyltransferase 6 (lysophosphatidic acid acyltransferase, zeta)                                                                                      | Homo sapiens |
| 222068 | transmembrane emp24 protein transport domain containing 4                                                                                                                         | Homo sapiens |
| 25888  | zinc finger protein 473                                                                                                                                                           | Homo sapiens |
| 8407   | transgelin 2                                                                                                                                                                      | Homo sapiens |
| 54537  | family with sequence similarity 35, member A                                                                                                                                      | Homo sapiens |
| 8463   | TEA domain family member 2                                                                                                                                                        | Homo sapiens |
| 57222  | endoplasmic reticulum-golgi intermediate compartment (ERGIC) 1                                                                                                                    | Homo sapiens |
| 50999  | transmembrane emp24 protein transport domain containing 5                                                                                                                         | Homo sapiens |
| 79903  | N-acetyltransferase 15 (GCN5-related, putative)                                                                                                                                   | Homo sapiens |
| 646903 | hypothetical LOC646903                                                                                                                                                            | Homo sapiens |
| 10443  | NEDD4 binding protein 2-like 2                                                                                                                                                    | Homo sapiens |
| 79877  | dephospho-CoA kinase domain containing                                                                                                                                            | Homo sapiens |
| 51295  | ECSIT homolog (Drosophila)                                                                                                                                                        | Homo sapiens |
| 7782   | solute carrier family 30 (zinc transporter), member 4                                                                                                                             | Homo sapiens |
| 22916  | nuclear cap binding protein subunit 2, 20kDa                                                                                                                                      | Homo sapiens |
| 196513 | DCP1 decapping enzyme homolog B (S. cerevisiae)                                                                                                                                   | Homo sapiens |
| 6926   | T-box 3                                                                                                                                                                           | Homo sapiens |
| 6612   | SMT3 suppressor of mif two 3 homolog 2 (S. cerevisiae) pseudogene; SMT3 suppressor of mif two 3 homolog 2 (S. cerevisiae); SMT3 suppressor of mif two 3 homolog 3 (S. cerevisiae) | Homo sapiens |
| 6613   | SMT3 suppressor of mif two 3 homolog 2 (S. cerevisiae) pseudogene; SMT3 suppressor of mif two 3 homolog 2 (S. cerevisiae); SMT3 suppressor of mif two 3 homolog 3 (S. cerevisiae) | Homo sapiens |
| 50854  | chromosome 6 open reading frame 48; small nucleolar RNA, C/D box 52                                                                                                               | Homo sapiens |
| 11328  | FK506 binding protein 9, 63 kDa                                                                                                                                                   | Homo sapiens |
| 7091   | transducin-like enhancer of split 4 (E(spl) homolog, Drosophila)                                                                                                                  | Homo sapiens |
| 6314   | ataxin 7                                                                                                                                                                          | Homo sapiens |
| 23613  | zinc finger, MYND-type containing 8                                                                                                                                               | Homo sapiens |
| 162073 | inositol 1,4,5-triphosphate receptor interacting protein-like 2                                                                                                                   | Homo sapiens |
| 55904  | myeloid/lymphoid or mixed-lineage leukemia 5 (trithorax homolog, Drosophila)                                                                                                      | Homo sapiens |
| 7283   | tubulin, gamma 1; similar to Tubulin, gamma 1                                                                                                                                     | Homo sapiens |
| 10484  | Sec23 homolog A (S. cerevisiae)                                                                                                                                                   | Homo sapiens |
| 80342  | TRAF3 interacting protein 3                                                                                                                                                       | Homo sapiens |
| 6777   | signal transducer and activator of transcription 5B                                                                                                                               | Homo sapiens |
| 84245  | methylthioribose-1-phosphate isomerase homolog (S. cerevisiae)                                                                                                                    | Homo sapiens |
| 54780  | non-SMC element 4 homolog A (S. cerevisiae)                                                                                                                                       | Homo sapiens |
| 54708  | membrane-associated ring finger (C3HC4) 5                                                                                                                                         | Homo sapiens |
| 51315  | lysine-rich coiled-coil 1                                                                                                                                                         | Homo sapiens |
| 79912  | pyridine nucleotide-disulphide oxidoreductase domain 1                                                                                                                            | Homo sapiens |
| 92249  | hypothetical LOC92249                                                                                                                                                             | Homo sapiens |
| 2627   | GATA binding protein 6                                                                                                                                                            | Homo sapiens |
| 56848  | sphingosine kinase 2                                                                                                                                                              | Homo sapiens |
| 57730  | similar to KIAA1641; similar to ankyrin repeat domain 26; ankyrin repeat domain 36B                                                                                               | Homo sapiens |
| 1973   | similar to eukaryotic translation initiation factor 4A; small nucleolar RNA, H/ACA box 67; eukaryotic translation initiation factor 4A, isoform 1                                 | Homo sapiens |
| 140606 | selenoprotein M                                                                                                                                                                   | Homo sapiens |
| 83855  | Kruppel-like factor 16                                                                                                                                                            | Homo sapiens |
| 25792  | CDKN1A interacting zinc finger protein 1                                                                                                                                          | Homo sapiens |
| 10721  | polymerase (DNA directed), theta                                                                                                                                                  | Homo sapiens |

|        |                                                                                                                                                                                                                                              |              |
|--------|----------------------------------------------------------------------------------------------------------------------------------------------------------------------------------------------------------------------------------------------|--------------|
| 56681  | SAR1 homolog A ( <i>S. cerevisiae</i> )                                                                                                                                                                                                      | Homo sapiens |
| 55146  | zinc finger, DHHC-type containing 4                                                                                                                                                                                                          | Homo sapiens |
| 338758 | hypothetical protein LOC338758                                                                                                                                                                                                               | Homo sapiens |
| 283683 | hypothetical protein LOC283683                                                                                                                                                                                                               | Homo sapiens |
| 51526  | chromosome 20 open reading frame 111                                                                                                                                                                                                         | Homo sapiens |
| 80205  | chromodomain helicase DNA binding protein 9                                                                                                                                                                                                  | Homo sapiens |
| 26519  | translocase of inner mitochondrial membrane 10 homolog (yeast)                                                                                                                                                                               | Homo sapiens |
| 11118  | butyrophilin, subfamily 3, member A2                                                                                                                                                                                                         | Homo sapiens |
| 7866   | interferon-related developmental regulator 2                                                                                                                                                                                                 | Homo sapiens |
| 29843  | SUMO1/sentrin specific peptidase 1                                                                                                                                                                                                           | Homo sapiens |
| 25865  | protein kinase D2                                                                                                                                                                                                                            | Homo sapiens |
| 4950   | occludin pseudogene; occludin                                                                                                                                                                                                                | Homo sapiens |
| 6217   | ribosomal protein S16 pseudogene 1; ribosomal protein S16 pseudogene 10; ribosomal protein S16                                                                                                                                               | Homo sapiens |
| 4087   | SMAD family member 2                                                                                                                                                                                                                         | Homo sapiens |
| 55969  | chromosome 20 open reading frame 24                                                                                                                                                                                                          | Homo sapiens |
| 83641  | family with sequence similarity 107, member B                                                                                                                                                                                                | Homo sapiens |
| 653519 | G protein-coupled receptor 89C; G protein-coupled receptor 89B; G protein-coupled receptor 89A                                                                                                                                               | Homo sapiens |
| 728932 | G protein-coupled receptor 89C; G protein-coupled receptor 89B; G protein-coupled receptor 89A                                                                                                                                               | Homo sapiens |
| 51463  | G protein-coupled receptor 89C; G protein-coupled receptor 89B; G protein-coupled receptor 89A                                                                                                                                               | Homo sapiens |
| 10691  | glucocorticoid modulatory element binding protein 1                                                                                                                                                                                          | Homo sapiens |
| 163049 | zinc finger protein 791                                                                                                                                                                                                                      | Homo sapiens |
| 152926 | protein phosphatase 1K (PP2C domain containing)                                                                                                                                                                                              | Homo sapiens |
| 116540 | mitochondrial ribosomal protein L53                                                                                                                                                                                                          | Homo sapiens |
| 109    | adenylate cyclase 3                                                                                                                                                                                                                          | Homo sapiens |
| 8985   | procollagen-lysine, 2-oxoglutarate 5-dioxygenase 3                                                                                                                                                                                           | Homo sapiens |
| 6129   | ribosomal protein L7 pseudogene 26; ribosomal protein L7 pseudogene 16; ribosomal protein L7; ribosomal protein L7 pseudogene 32; ribosomal protein L7 pseudogene 23; ribosomal protein L7 pseudogene 24; ribosomal protein L7 pseudogene 20 | Homo sapiens |
| 8848   | TSC22 domain family, member 1                                                                                                                                                                                                                | Homo sapiens |
| 134549 | shroom family member 1                                                                                                                                                                                                                       | Homo sapiens |
| 4731   | NADH dehydrogenase (ubiquinone) flavoprotein 3, 10kDa                                                                                                                                                                                        | Homo sapiens |
| 387338 | NOL1/NOP2/Sun domain family, member 4                                                                                                                                                                                                        | Homo sapiens |
| 83658  | dynein, light chain, roadblock-type 1                                                                                                                                                                                                        | Homo sapiens |
| 64222  | torsin family 3, member A                                                                                                                                                                                                                    | Homo sapiens |
| 254295 | phytanoyl-CoA dioxygenase domain containing 1                                                                                                                                                                                                | Homo sapiens |
| 29062  | WD repeat domain 91                                                                                                                                                                                                                          | Homo sapiens |
| 197335 | WD repeat domain 90                                                                                                                                                                                                                          | Homo sapiens |
| 9643   | mortality factor 4 like 2                                                                                                                                                                                                                    | Homo sapiens |
| 23616  | SH3-domain binding protein 1                                                                                                                                                                                                                 | Homo sapiens |
| 158293 | family with sequence similarity 120A opposite strand                                                                                                                                                                                         | Homo sapiens |
| 144699 | F-box and leucine-rich repeat protein 14                                                                                                                                                                                                     | Homo sapiens |
| 23612  | pleckstrin homology-like domain, family A, member 3                                                                                                                                                                                          | Homo sapiens |
| 9315   | chromosome 5 open reading frame 13                                                                                                                                                                                                           | Homo sapiens |
| 117143 | transcriptional adaptor 1 (HFI1 homolog, yeast)-like                                                                                                                                                                                         | Homo sapiens |
| 4678   | nuclear autoantigenic sperm protein (histone-binding)                                                                                                                                                                                        | Homo sapiens |
| 8574   | aldo-keto reductase family 7, member A2 (aflatoxin aldehyde reductase)                                                                                                                                                                       | Homo sapiens |
| 84516  | dynactin 5 (p25)                                                                                                                                                                                                                             | Homo sapiens |
| 414777 | HLA complex group 18                                                                                                                                                                                                                         | Homo sapiens |
| 55683  | KIAA1310                                                                                                                                                                                                                                     | Homo sapiens |
| 6832   | suppressor of var1, 3-like 1 ( <i>S. cerevisiae</i> )                                                                                                                                                                                        | Homo sapiens |
| 81555  | Yip1 domain family, member 5                                                                                                                                                                                                                 | Homo sapiens |
| 54856  | YY1 associated protein 1; gon-4-like ( <i>C. elegans</i> )                                                                                                                                                                                   | Homo sapiens |
| 55249  | YY1 associated protein 1; gon-4-like ( <i>C. elegans</i> )                                                                                                                                                                                   | Homo sapiens |
| 84274  | coenzyme Q5 homolog, methyltransferase ( <i>S. cerevisiae</i> )                                                                                                                                                                              | Homo sapiens |
| 8192   | ClpP caseinolytic peptidase, ATP-dependent, proteolytic subunit homolog ( <i>E. coli</i> )                                                                                                                                                   | Homo sapiens |
| 63916  | engulfment and cell motility 2                                                                                                                                                                                                               | Homo sapiens |
| 6662   | SRY (sex determining region Y)-box 9                                                                                                                                                                                                         | Homo sapiens |
| 9972   | nucleoporin 153kDa                                                                                                                                                                                                                           | Homo sapiens |
| 11073  | topoisomerase (DNA) II binding protein 1                                                                                                                                                                                                     | Homo sapiens |
| 54741  | leptin receptor overlapping transcript                                                                                                                                                                                                       | Homo sapiens |
| 78988  | mitochondrial ribosomal protein 63                                                                                                                                                                                                           | Homo sapiens |
| 1869   | E2F transcription factor 1                                                                                                                                                                                                                   | Homo sapiens |
| 80824  | dual specificity phosphatase 16                                                                                                                                                                                                              | Homo sapiens |
| 9069   | claudin 12                                                                                                                                                                                                                                   | Homo sapiens |
| 9128   | PRP4 pre-mRNA processing factor 4 homolog (yeast)                                                                                                                                                                                            | Homo sapiens |
| 663    | BCL2/adenovirus E1B 19kDa interacting protein 2                                                                                                                                                                                              | Homo sapiens |
| 51652  | vacuolar protein sorting 24 homolog ( <i>S. cerevisiae</i> ); ring finger protein 103                                                                                                                                                        | Homo sapiens |
| 7844   | vacuolar protein sorting 24 homolog ( <i>S. cerevisiae</i> ); ring finger protein 103                                                                                                                                                        | Homo sapiens |
| 121441 | neural precursor cell expressed, developmentally down-regulated 1                                                                                                                                                                            | Homo sapiens |
| 9685   | clathrin interactor 1                                                                                                                                                                                                                        | Homo sapiens |
| 150274 | HscB iron-sulfur cluster co-chaperone homolog ( <i>E. coli</i> )                                                                                                                                                                             | Homo sapiens |
| 9955   | heparan sulfate (glucosamine) 3-O-sulfotransferase 3A1                                                                                                                                                                                       | Homo sapiens |
| 28977  | mitochondrial ribosomal protein L42                                                                                                                                                                                                          | Homo sapiens |

|        |                                                                                                                                                                                                              |              |
|--------|--------------------------------------------------------------------------------------------------------------------------------------------------------------------------------------------------------------|--------------|
| 11034  | destrin (actin depolymerizing factor)                                                                                                                                                                        | Homo sapiens |
| 11176  | bromodomain adjacent to zinc finger domain, 2A                                                                                                                                                               | Homo sapiens |
| 128869 | phosphatidylinositol glycan anchor biosynthesis, class U                                                                                                                                                     | Homo sapiens |
| 8609   | Kruppel-like factor 7 (ubiquitous)                                                                                                                                                                           | Homo sapiens |
| 27440  | cat eye syndrome chromosome region, candidate 5                                                                                                                                                              | Homo sapiens |
| 7321   | ubiquitin-conjugating enzyme E2D 1 (UBC4/5 homolog, yeast)                                                                                                                                                   | Homo sapiens |
| 253461 | zinc finger and BTB domain containing 38                                                                                                                                                                     | Homo sapiens |
| 9748   | STE20-like kinase (yeast)                                                                                                                                                                                    | Homo sapiens |
| 5111   | proliferating cell nuclear antigen                                                                                                                                                                           | Homo sapiens |
| 23528  | zinc finger protein 281                                                                                                                                                                                      | Homo sapiens |
| 64743  | WD repeat domain 13                                                                                                                                                                                          | Homo sapiens |
| 51649  | mitochondrial ribosomal protein S23                                                                                                                                                                          | Homo sapiens |
| 55900  | zinc finger protein 302                                                                                                                                                                                      | Homo sapiens |
| 4247   | mannosyl (alpha-1,6-)-glycoprotein beta-1,2-N-acetylglucosaminyltransferase                                                                                                                                  | Homo sapiens |
| 9692   | KIAA0391                                                                                                                                                                                                     | Homo sapiens |
| 3398   | inhibitor of DNA binding 2, dominant negative helix-loop-helix protein                                                                                                                                       | Homo sapiens |
| 26058  | GRB10 interacting GYF protein 2                                                                                                                                                                              | Homo sapiens |
| 51654  | CDK5 regulatory subunit associated protein 1                                                                                                                                                                 | Homo sapiens |
| 11282  | mannosyl (alpha-1,3-)-glycoprotein beta-1,4-N-acetylglucosaminyltransferase, isozyme B                                                                                                                       | Homo sapiens |
| 26520  | translocase of inner mitochondrial membrane 9 homolog (yeast)                                                                                                                                                | Homo sapiens |
| 353    | adenine phosphoribosyltransferase                                                                                                                                                                            | Homo sapiens |
| 1611   | death-associated protein                                                                                                                                                                                     | Homo sapiens |
| 196    | aryl hydrocarbon receptor                                                                                                                                                                                    | Homo sapiens |
| 9711   | KIAA0226                                                                                                                                                                                                     | Homo sapiens |
| 9652   | tetratricopeptide repeat domain 37                                                                                                                                                                           | Homo sapiens |
| 52     | acid phosphatase 1, soluble                                                                                                                                                                                  | Homo sapiens |
| 9294   | sphingosine-1-phosphate receptor 2                                                                                                                                                                           | Homo sapiens |
| 153768 | PRELI domain containing 2                                                                                                                                                                                    | Homo sapiens |
| 79145  | coiled-coil-helix-coiled-coil-helix domain containing 7                                                                                                                                                      | Homo sapiens |
| 85013  | transmembrane protein 128                                                                                                                                                                                    | Homo sapiens |
| 54458  | proline rich 13                                                                                                                                                                                              | Homo sapiens |
| 23254  | kazrin                                                                                                                                                                                                       | Homo sapiens |
| 64689  | golgi reassembly stacking protein 1, 65kDa                                                                                                                                                                   | Homo sapiens |
| 157922 | calmodulin regulated spectrin-associated protein 1                                                                                                                                                           | Homo sapiens |
| 27102  | eukaryotic translation initiation factor 2-alpha kinase 1                                                                                                                                                    | Homo sapiens |
| 55680  | RUN and FYVE domain containing 2                                                                                                                                                                             | Homo sapiens |
| 998    | cell division cycle 42 (GTP binding protein, 25kDa); cell division cycle 42 pseudogene 2                                                                                                                     | Homo sapiens |
| 677    | zinc finger protein 36, C3H type-like 1                                                                                                                                                                      | Homo sapiens |
| 4781   | nuclear factor I/B                                                                                                                                                                                           | Homo sapiens |
| 8507   | ectodermal-neural cortex (with BTB-like domain)                                                                                                                                                              | Homo sapiens |
| 3704   | inosine triphosphatase (nucleoside triphosphate pyrophosphatase)                                                                                                                                             | Homo sapiens |
| 84271  | polymerase (DNA-directed), delta interacting protein 3                                                                                                                                                       | Homo sapiens |
| 1802   | DPH2 homolog (S. cerevisiae)                                                                                                                                                                                 | Homo sapiens |
| 115201 | ATG4 autophagy related 4 homolog A (S. cerevisiae)                                                                                                                                                           | Homo sapiens |
| 113179 | adenosine deaminase, tRNA-specific 3, TAD3 homolog (S. cerevisiae)                                                                                                                                           | Homo sapiens |
| 9451   | eukaryotic translation initiation factor 2-alpha kinase 3                                                                                                                                                    | Homo sapiens |
| 50861  | stathmin-like 3                                                                                                                                                                                              | Homo sapiens |
| 2632   | glucan (1,4-alpha-), branching enzyme 1                                                                                                                                                                      | Homo sapiens |
| 7483   | wingless-type MMTV integration site family, member 9A                                                                                                                                                        | Homo sapiens |
| 403    | ADP-ribosylation factor-like 3                                                                                                                                                                               | Homo sapiens |
| 163778 | small proline-rich protein 4                                                                                                                                                                                 | Homo sapiens |
| 80745  | THUMP domain containing 2                                                                                                                                                                                    | Homo sapiens |
| 4968   | 8-oxoguanine DNA glycosylase                                                                                                                                                                                 | Homo sapiens |
| 439949 | hypothetical protein LOC439949                                                                                                                                                                               | Homo sapiens |
| 6138   | ribosomal protein L15 pseudogene 22; ribosomal protein L15 pseudogene 18; ribosomal protein L15 pseudogene 17; ribosomal protein L15 pseudogene 3; ribosomal protein L15 pseudogene 7; ribosomal protein L15 | Homo sapiens |
| 6990   | dynein, light chain, Tctex-type 3                                                                                                                                                                            | Homo sapiens |
| 57003  | coiled-coil domain containing 47                                                                                                                                                                             | Homo sapiens |
| 94056  | synapse associated protein 1, SAP47 homolog (Drosophila)                                                                                                                                                     | Homo sapiens |
| 23788  | mitochondrial carrier homolog 2 (C. elegans)                                                                                                                                                                 | Homo sapiens |
| 119559 | sideroflexin 4                                                                                                                                                                                               | Homo sapiens |
| 54920  | dihydrouridine synthase 2-like, SMM1 homolog (S. cerevisiae)                                                                                                                                                 | Homo sapiens |
| 26268  | F-box protein 9                                                                                                                                                                                              | Homo sapiens |
| 136647 | chromosome 7 open reading frame 11                                                                                                                                                                           | Homo sapiens |
| 55839  | centromere protein N                                                                                                                                                                                         | Homo sapiens |
| 9130   | family with sequence similarity 50, member A                                                                                                                                                                 | Homo sapiens |
| 83461  | cell division cycle associated 3                                                                                                                                                                             | Homo sapiens |
| 388796 | hypothetical LOC388796                                                                                                                                                                                       | Homo sapiens |
| 262    | adenosylmethionine decarboxylase 1                                                                                                                                                                           | Homo sapiens |
| 3239   | homeobox D13                                                                                                                                                                                                 | Homo sapiens |
| 157753 | transmembrane protein 74                                                                                                                                                                                     | Homo sapiens |
| 9135   | rabaptin, RAB GTPase binding effector protein 1                                                                                                                                                              | Homo sapiens |
| 5723   | phosphoserine phosphatase-like; phosphoserine phosphatase                                                                                                                                                    | Homo sapiens |
| 282991 | biogenesis of lysosomal organelles complex-1, subunit 2                                                                                                                                                      | Homo sapiens |
| 84912  | solute carrier family 35, member B4                                                                                                                                                                          | Homo sapiens |

|        |                                                                                                                           |              |
|--------|---------------------------------------------------------------------------------------------------------------------------|--------------|
| 2224   | farnesyl diphosphate synthase (farnesyl pyrophosphate synthetase, dimethylallyltranstransferase, geranyltranstransferase) | Homo sapiens |
| 124808 | coiled-coil domain containing 43                                                                                          | Homo sapiens |
| 26580  | Bernardinelli-Seip congenital lipodystrophy 2 (seipin)                                                                    | Homo sapiens |
| 132789 | glucosamine-6-phosphate deaminase 2                                                                                       | Homo sapiens |
| 10437  | interferon, gamma-inducible protein 30                                                                                    | Homo sapiens |
| 154661 | RUN domain containing 3B                                                                                                  | Homo sapiens |
| 7172   | thiopurine S-methyltransferase                                                                                            | Homo sapiens |
| 5250   | solute carrier family 25 (mitochondrial carrier; phosphate carrier), member 3                                             | Homo sapiens |
| 1725   | deoxyhypusine synthase                                                                                                    | Homo sapiens |
| 57579  | family with sequence similarity 135, member A                                                                             | Homo sapiens |
| 23303  | kinesin family member 13B                                                                                                 | Homo sapiens |
| 55631  | leucine rich repeat containing 40                                                                                         | Homo sapiens |
| 22876  | inositol polyphosphate-5-phosphatase F                                                                                    | Homo sapiens |
| 84316  | LSM domain containing 1                                                                                                   | Homo sapiens |
| 10463  | solute carrier family 30 (zinc transporter), member 9                                                                     | Homo sapiens |
| 10424  | progesterone receptor membrane component 2                                                                                | Homo sapiens |
| 1716   | deoxyguanosine kinase                                                                                                     | Homo sapiens |
| 23507  | leucine rich repeat containing 8 family, member B                                                                         | Homo sapiens |
| 7162   | trophoblast glycoprotein                                                                                                  | Homo sapiens |
| 9731   | KIAA0562                                                                                                                  | Homo sapiens |
| 4983   | oligophrenin 1                                                                                                            | Homo sapiens |
| 23387  | serine/threonine-protein kinase QSK                                                                                       | Homo sapiens |
| 375704 | energy homeostasis associated                                                                                             | Homo sapiens |
| 60485  | salvador homolog 1 (Drosophila)                                                                                           | Homo sapiens |
| 7130   | tumor necrosis factor, alpha-induced protein 6                                                                            | Homo sapiens |
| 1058   | centromere protein A                                                                                                      | Homo sapiens |
| 55425  | KIAA1704                                                                                                                  | Homo sapiens |
| 28970  | chromosome 11 open reading frame 54                                                                                       | Homo sapiens |
| 6120   | rcRPE; ribulose-5-phosphate-3-epimerase                                                                                   | Homo sapiens |
| 5034   | prolyl 4-hydroxylase, beta polypeptide                                                                                    | Homo sapiens |
| 118487 | coiled-coil-helix-coiled-coil-helix domain containing 1                                                                   | Homo sapiens |
| 23065  | KIAA0090                                                                                                                  | Homo sapiens |
| 23054  | nuclear receptor coactivator 6                                                                                            | Homo sapiens |
| 60343  | family with sequence similarity 3, member A                                                                               | Homo sapiens |
| 8703   | UDP-Gal:betaGlcNAc beta 1,4- galactosyltransferase, polypeptide 3                                                         | Homo sapiens |
| 55486  | presenilin associated, rhomboid-like                                                                                      | Homo sapiens |
| 10808  | heat shock 105kDa/110kDa protein 1                                                                                        | Homo sapiens |
| 114825 | PWWP domain containing 2A                                                                                                 | Homo sapiens |
| 23641  | leucine zipper, down-regulated in cancer 1                                                                                | Homo sapiens |
| 5252   | PHD finger protein 1                                                                                                      | Homo sapiens |
| 112616 | CKLF-like MARVEL transmembrane domain containing 7                                                                        | Homo sapiens |
| 201965 | RWD domain containing 4A                                                                                                  | Homo sapiens |
| 5434   | polymerase (RNA) II (DNA directed) polypeptide E, 25kDa                                                                   | Homo sapiens |
| 1070   | centrin, EF-hand protein, 3 (CDC31 homolog, yeast)                                                                        | Homo sapiens |
| 6513   | solute carrier family 2 (facilitated glucose transporter), member 1                                                       | Homo sapiens |
| 5203   | prefoldin subunit 4                                                                                                       | Homo sapiens |
| 2218   | fukutin                                                                                                                   | Homo sapiens |
| 51375  | sorting nexin 7                                                                                                           | Homo sapiens |
| 4508   | Cytochrome c oxidase subunit 3; ATP synthase subunit a; ATP synthase protein 8                                            | Homo sapiens |
| 30837  | suppressor of cytokine signaling 7                                                                                        | Homo sapiens |
| 5725   | polypyrimidine tract binding protein 1                                                                                    | Homo sapiens |
| 26354  | guanine nucleotide binding protein-like 3 (nucleolar)                                                                     | Homo sapiens |
| 53981  | cleavage and polyadenylation specific factor 2, 100kDa                                                                    | Homo sapiens |
| 5213   | phosphofructokinase, muscle                                                                                               | Homo sapiens |
| 9620   | cadherin, EGF LAG seven-pass G-type receptor 1 (flamingo homolog, Drosophila)                                             | Homo sapiens |
| 8732   | RNA guanylyltransferase and 5'-phosphatase                                                                                | Homo sapiens |
| 2957   | general transcription factor IIA, 1, 19/37kDa                                                                             | Homo sapiens |
| 253868 | chromosome 20 open reading frame 200                                                                                      | Homo sapiens |
| 23786  | BCL2-like 13 (apoptosis facilitator)                                                                                      | Homo sapiens |
| 80167  | chromosome 4 open reading frame 29                                                                                        | Homo sapiens |
| 134429 | StAR-related lipid transfer (START) domain containing 4                                                                   | Homo sapiens |
| 157247 | hypothetical protein MGC27345                                                                                             | Homo sapiens |
| 85459  | KIAA1731                                                                                                                  | Homo sapiens |
| 8569   | MAP kinase interacting serine/threonine kinase 1                                                                          | Homo sapiens |
| 84299  | chromosome 17 open reading frame 37                                                                                       | Homo sapiens |
| 57089  | ectonucleoside triphosphate diphosphohydrolase 7                                                                          | Homo sapiens |
| 23404  | exosome component 2                                                                                                       | Homo sapiens |
| 2649   | nuclear receptor subfamily 6, group A, member 1                                                                           | Homo sapiens |
| 155435 | RNA binding motif protein 33                                                                                              | Homo sapiens |
| 28987  | NIN1/RPN12 binding protein 1 homolog (S. cerevisiae); hypothetical LOC100132364                                           | Homo sapiens |
| 9833   | maternal embryonic leucine zipper kinase                                                                                  | Homo sapiens |
| 29086  | chromosome 19 open reading frame 62                                                                                       | Homo sapiens |
| 83989  | family with sequence similarity 172, member A                                                                             | Homo sapiens |
| 5613   | protein kinase, X-linked                                                                                                  | Homo sapiens |
| 23683  | protein kinase D3                                                                                                         | Homo sapiens |
| 126382 | nuclear receptor 2C2-associated protein                                                                                   | Homo sapiens |

|        |                                                                                      |              |
|--------|--------------------------------------------------------------------------------------|--------------|
| 4670   | heterogeneous nuclear ribonucleoprotein M                                            | Homo sapiens |
| 3226   | homeobox C10                                                                         | Homo sapiens |
| 1665   | DEAH (Asp-Glu-Ala-His) box polypeptide 15                                            | Homo sapiens |
| 131566 | discoidin, CUB and LCCL domain containing 2                                          | Homo sapiens |
| 1875   | E2F transcription factor 5, p130-binding                                             | Homo sapiens |
| 128061 | chromosome 1 open reading frame 131                                                  | Homo sapiens |
| 93973  | ARP8 actin-related protein 8 homolog (yeast)                                         | Homo sapiens |
| 7248   | tuberous sclerosis 1                                                                 | Homo sapiens |
| 8836   | gamma-glutamyl hydrolase (conjugase, folylpolyglutamyl hydrolase)                    | Homo sapiens |
| 283742 | family with sequence similarity 98, member B                                         | Homo sapiens |
| 23064  | senataxin                                                                            | Homo sapiens |
| 3396   | immature colon carcinoma transcript 1                                                | Homo sapiens |
| 254048 | ubiuclen 2                                                                           | Homo sapiens |
| 9477   | mediator complex subunit 20                                                          | Homo sapiens |
| 51398  | chromosome 19 open reading frame 56                                                  | Homo sapiens |
| 11033  | ArfGAP with dual PH domains 1                                                        | Homo sapiens |
| 9701   | SAPS domain family, member 2                                                         | Homo sapiens |
| 3099   | hexokinase 2 pseudogene; hexokinase 2                                                | Homo sapiens |
| 162967 | zinc finger protein 320                                                              | Homo sapiens |
| 5522   | protein phosphatase 2 (formerly 2A), regulatory subunit B, gamma isoform             | Homo sapiens |
| 7314   | ubiquitin B                                                                          | Homo sapiens |
| 55729  | activating transcription factor 7 interacting protein                                | Homo sapiens |
| 494143 | ChaC, cation transport regulator homolog 2 (E. coli)                                 | Homo sapiens |
| 87     | actinin, alpha 1                                                                     | Homo sapiens |
| 54662  | TBC1 domain family, member 13                                                        | Homo sapiens |
| 5577   | protein kinase, cAMP-dependent, regulatory, type II, beta                            | Homo sapiens |
| 55379  | leucine rich repeat containing 59                                                    | Homo sapiens |
| 57679  | amyotrophic lateral sclerosis 2 (juvenile)                                           | Homo sapiens |
| 908    | chaperonin containing TCP1, subunit 6A (zeta 1)                                      | Homo sapiens |
| 22870  | SAPS domain family, member 1                                                         | Homo sapiens |
| 28981  | intraflagellar transport 81 homolog (Chlamydomonas)                                  | Homo sapiens |
| 114794 | extracellular leucine-rich repeat and fibronectin type III domain containing 2       | Homo sapiens |
| 84172  | polymerase (RNA) I polypeptide B, 128kDa                                             | Homo sapiens |
| 79080  | coiled-coil domain containing 86                                                     | Homo sapiens |
| 7465   | WEE1 homolog (S. pombe)                                                              | Homo sapiens |
| 114883 | oxysterol binding protein-like 9                                                     | Homo sapiens |
| 140901 | serine/threonine kinase 35                                                           | Homo sapiens |
| 80318  | G kinase anchoring protein 1                                                         | Homo sapiens |
| 200942 | kelch domain containing 8B                                                           | Homo sapiens |
| 7485   | tryptophan rich basic protein                                                        | Homo sapiens |
| 203414 | chromosome X open reading frame 24                                                   | Homo sapiens |
| 57209  | zinc finger protein 248                                                              | Homo sapiens |
| 135112 | nuclear receptor coactivator 7                                                       | Homo sapiens |
| 5130   | phosphate cytidyltransferase 1, choline, alpha                                       | Homo sapiens |
| 55035  | nucleolar protein 8                                                                  | Homo sapiens |
| 11059  | WW domain containing E3 ubiquitin protein ligase 1                                   | Homo sapiens |
| 11232  | polymerase (DNA directed), gamma 2, accessory subunit                                | Homo sapiens |
| 51479  | ankyrin repeat and FYVE domain containing 1                                          | Homo sapiens |
| 650794 | similar to FRAS1 related extracellular matrix protein 2                              | Homo sapiens |
| 25978  | chromatin modifying protein 2B                                                       | Homo sapiens |
| 80351  | tankyrase, TRF1-interacting ankyrin-related ADP-ribose polymerase 2                  | Homo sapiens |
| 5395   | PMS2 postmeiotic segregation increased 2 (S. cerevisiae)                             | Homo sapiens |
| 9380   | glyoxylate reductase/hydroxypyruvate reductase                                       | Homo sapiens |
| 128387 | TatD DNase domain containing 3                                                       | Homo sapiens |
| 10927  | spindlin 1                                                                           | Homo sapiens |
| 64976  | mitochondrial ribosomal protein L40                                                  | Homo sapiens |
| 54802  | tRNA isopentenyltransferase 1                                                        | Homo sapiens |
| 84187  | transmembrane protein 164                                                            | Homo sapiens |
| 25804  | LSM4 homolog, U6 small nuclear RNA associated (S. cerevisiae)                        | Homo sapiens |
| 51205  | acid phosphatase 6, lysophosphatidic                                                 | Homo sapiens |
| 283455 | kinase suppressor of ras 2                                                           | Homo sapiens |
| 54880  | BCL6 co-repressor                                                                    | Homo sapiens |
| 224    | aldehyde dehydrogenase 3 family, member A2                                           | Homo sapiens |
| 387893 | SET domain containing (lysine methyltransferase) 8                                   | Homo sapiens |
| 29980  | downstream neighbor of SON                                                           | Homo sapiens |
| 4809   | NHP2 non-histone chromosome protein 2-like 1 (S. cerevisiae)                         | Homo sapiens |
| 3276   | protein arginine methyltransferase 1                                                 | Homo sapiens |
| 51092  | SID1 transmembrane family, member 2                                                  | Homo sapiens |
| 474170 | leucine rich repeat containing 37, member A2                                         | Homo sapiens |
| 51530  | zinc finger, C3HC-type containing 1                                                  | Homo sapiens |
| 112939 | nucleus accumbens associated 1, BEN and BTB (POZ) domain containing                  | Homo sapiens |
| 391632 | olfactory receptor, family 7, subfamily E, member 35 pseudogene                      | Homo sapiens |
| 23411  | sirtuin (silent mating type information regulation 2 homolog) 1 (S. cerevisiae)      | Homo sapiens |
| 8491   | mitogen-activated protein kinase kinase kinase kinase 3                              | Homo sapiens |
| 116832 | ribosomal protein L39-like                                                           | Homo sapiens |
| 55814  | B double prime 1, subunit of RNA polymerase III transcription initiation factor IIIB | Homo sapiens |
| 1486   | chitinase, di-N-acetyl-                                                              | Homo sapiens |

|        |                                                                                                                                                                                         |              |
|--------|-----------------------------------------------------------------------------------------------------------------------------------------------------------------------------------------|--------------|
| 6194   | ribosomal protein S6 pseudogene 25; ribosomal protein S6; ribosomal protein S6 pseudogene 1                                                                                             | Homo sapiens |
| 51074  | APAF1 interacting protein; similar to APAF1 interacting protein                                                                                                                         | Homo sapiens |
| 10389  | sex comb on midleg-like 2 (Drosophila)                                                                                                                                                  | Homo sapiens |
| 51439  | family with sequence similarity 8, member A1                                                                                                                                            | Homo sapiens |
| 22820  | coatomer protein complex, subunit gamma                                                                                                                                                 | Homo sapiens |
| 81628  | TSC22 domain family, member 4                                                                                                                                                           | Homo sapiens |
| 25886  | WD repeat domain 51A                                                                                                                                                                    | Homo sapiens |
| 1121   | choroideremia (Rab escort protein 1)                                                                                                                                                    | Homo sapiens |
| 10069  | RWD domain containing 2B                                                                                                                                                                | Homo sapiens |
| 10465  | peptidylprolyl isomerase H (cyclophilin H)                                                                                                                                              | Homo sapiens |
| 25801  | grancalcin, EF-hand calcium binding protein                                                                                                                                             | Homo sapiens |
| 90410  | intraflagellar transport 20 homolog (Chlamydomonas)                                                                                                                                     | Homo sapiens |
| 10935  | peroxiredoxin 3                                                                                                                                                                         | Homo sapiens |
| 9933   | KIAA0020                                                                                                                                                                                | Homo sapiens |
| 23266  | latrophilin 2                                                                                                                                                                           | Homo sapiens |
| 646762 | hypothetical LOC646762                                                                                                                                                                  | Homo sapiens |
| 80895  | integrin-linked kinase-associated serine/threonine phosphatase 2C                                                                                                                       | Homo sapiens |
| 55171  | TBCC domain containing 1                                                                                                                                                                | Homo sapiens |
| 55156  | armadillo repeat containing 1                                                                                                                                                           | Homo sapiens |
| 6432   | splicing factor, arginine/serine-rich 7, 35kDa                                                                                                                                          | Homo sapiens |
| 9941   | endo/exonuclease (5'-3'), endonuclease G-like                                                                                                                                           | Homo sapiens |
| 23272  | chromosome 3 open reading frame 63                                                                                                                                                      | Homo sapiens |
| 354    | kallikrein-related peptidase 3                                                                                                                                                          | Homo sapiens |
| 7082   | tight junction protein 1 (zona occludens 1)                                                                                                                                             | Homo sapiens |
| 166815 | tigger transposable element derived 2                                                                                                                                                   | Homo sapiens |
| 3607   | forkhead box K2                                                                                                                                                                         | Homo sapiens |
| 285830 | hypothetical LOC285830                                                                                                                                                                  | Homo sapiens |
| 8925   | hect (homologous to the E6-AP (UBE3A) carboxyl terminus) domain and RCC1 (CHC1)-like domain (RLD) 1                                                                                     | Homo sapiens |
| 23020  | similar to U5 snRNP-specific protein, 200 kDa; small nuclear ribonucleoprotein 200kDa (U5)                                                                                              | Homo sapiens |
| 388327 | chromosome 17 open reading frame 100                                                                                                                                                    | Homo sapiens |
| 387763 | hypothetical protein LOC387763                                                                                                                                                          | Homo sapiens |
| 8682   | phosphoprotein enriched in astrocytes 15                                                                                                                                                | Homo sapiens |
| 4710   | hypothetical gene supported by AF044957; NM_004547; NADH dehydrogenase (ubiquinone) 1 beta subcomplex, 4, 15kDa                                                                         | Homo sapiens |
| 84930  | microtubule associated serine/threonine kinase-like                                                                                                                                     | Homo sapiens |
| 28958  | coiled-coil domain containing 56                                                                                                                                                        | Homo sapiens |
| 4709   | NADH dehydrogenase (ubiquinone) 1 beta subcomplex, 3, 12kDa                                                                                                                             | Homo sapiens |
| 3235   | homeobox D9                                                                                                                                                                             | Homo sapiens |
| 1265   | calponin 2                                                                                                                                                                              | Homo sapiens |
| 10090  | uronyl-2-sulfotransferase                                                                                                                                                               | Homo sapiens |
| 396    | Rho GDP dissociation inhibitor (GDI) alpha                                                                                                                                              | Homo sapiens |
| 9410   | small nuclear ribonucleoprotein 40kDa (U5)                                                                                                                                              | Homo sapiens |
| 10687  | paraneoplastic antigen MA2                                                                                                                                                              | Homo sapiens |
| 51253  | mitochondrial ribosomal protein L37                                                                                                                                                     | Homo sapiens |
| 120    | adducin 3 (gamma)                                                                                                                                                                       | Homo sapiens |
| 85451  | unkempt homolog (Drosophila)                                                                                                                                                            | Homo sapiens |
| 514    | ATP synthase, H <sup>+</sup> transporting, mitochondrial F1 complex, epsilon subunit pseudogene 2; ATP synthase, H <sup>+</sup> transporting, mitochondrial F1 complex, epsilon subunit | Homo sapiens |
| 2135   | exostoses (multiple)-like 2                                                                                                                                                             | Homo sapiens |
| 55157  | aspartyl-tRNA synthetase 2, mitochondrial                                                                                                                                               | Homo sapiens |
| 285282 | RAB, member of RAS oncogene family-like 3                                                                                                                                               | Homo sapiens |
| 6646   | sterol O-acyltransferase 1                                                                                                                                                              | Homo sapiens |
| 284370 | zinc finger protein 615                                                                                                                                                                 | Homo sapiens |
| 444    | aspartate beta-hydroxylase                                                                                                                                                              | Homo sapiens |
| 55186  | solute carrier family 25, member 36                                                                                                                                                     | Homo sapiens |
| 80145  | THO complex 7 homolog (Drosophila)                                                                                                                                                      | Homo sapiens |
| 55081  | intraflagellar transport 57 homolog (Chlamydomonas)                                                                                                                                     | Homo sapiens |
| 152579 | secl family domain containing 2                                                                                                                                                         | Homo sapiens |
| 3480   | insulin-like growth factor 1 receptor                                                                                                                                                   | Homo sapiens |
| 26009  | zinc finger, ZZ-type containing 3                                                                                                                                                       | Homo sapiens |
| 26168  | SUMO1/sentrin/SMT3 specific peptidase 3                                                                                                                                                 | Homo sapiens |
| 25870  | sulfatase modifying factor 2                                                                                                                                                            | Homo sapiens |
| 5087   | pre-B-cell leukemia homeobox 1                                                                                                                                                          | Homo sapiens |
| 55686  | melanoregulin                                                                                                                                                                           | Homo sapiens |
| 493869 | glutathione peroxidase 8 (putative)                                                                                                                                                     | Homo sapiens |
| 163081 | zinc finger protein 567                                                                                                                                                                 | Homo sapiens |
| 25     | c-abl oncogene 1, receptor tyrosine kinase                                                                                                                                              | Homo sapiens |
| 1741   | discs, large homolog 3 (Drosophila)                                                                                                                                                     | Homo sapiens |
| 117178 | synovial sarcoma, X breakpoint 2 interacting protein                                                                                                                                    | Homo sapiens |
| 8209   | chromosome 21 open reading frame 33                                                                                                                                                     | Homo sapiens |
| 283267 | hypothetical LOC283267                                                                                                                                                                  | Homo sapiens |
| 339175 | methyltransferase like 2A                                                                                                                                                               | Homo sapiens |
| 2782   | guanine nucleotide binding protein (G protein), beta polypeptide 1                                                                                                                      | Homo sapiens |
| 57826  | RAP2C, member of RAS oncogene family                                                                                                                                                    | Homo sapiens |



|        |                                                                                          |              |
|--------|------------------------------------------------------------------------------------------|--------------|
| 5984   | replication factor C (activator 1) 4, 37kDa                                              | Homo sapiens |
| 10600  | ubiquitin specific peptidase 16                                                          | Homo sapiens |
| 5569   | protein kinase (cAMP-dependent, catalytic) inhibitor alpha                               | Homo sapiens |
| 113201 | cancer susceptibility candidate 4                                                        | Homo sapiens |
| 246243 | ribonuclease H1                                                                          | Homo sapiens |
| 23283  | cleavage stimulation factor, 3' pre-RNA, subunit 2, 64kDa, tau variant                   | Homo sapiens |
| 5589   | protein kinase C substrate 80K-H                                                         | Homo sapiens |
| 26088  | golgi associated, gamma adaptin ear containing, ARF binding protein 1                    | Homo sapiens |
| 257397 | mitogen-activated protein kinase kinase kinase 7 interacting protein 3                   | Homo sapiens |
| 80314  | enhancer of polycomb homolog 1 (Drosophila)                                              | Homo sapiens |
| 3070   | helicase, lymphoid-specific                                                              | Homo sapiens |
| 158427 | chromosome 9 open reading frame 97                                                       | Homo sapiens |
| 11218  | DEAD (Asp-Glu-Ala-Asp) box polypeptide 20                                                | Homo sapiens |
| 9373   | phospholipase A2-activating protein                                                      | Homo sapiens |
| 9991   | ROD1 regulator of differentiation 1 (S. pombe)                                           | Homo sapiens |
| 29965  | chromosome 16 open reading frame 5                                                       | Homo sapiens |
| 1203   | ceroid-lipofuscinosis, neuronal 5                                                        | Homo sapiens |
| 441194 | PMS2 C-terminal like pseudogene                                                          | Homo sapiens |
| 51203  | nucleolar and spindle associated protein 1                                               | Homo sapiens |
| 79844  | zinc finger, DHHC-type containing 11                                                     | Homo sapiens |
| 10105  | peptidylprolyl isomerase F                                                               | Homo sapiens |
| 55230  | ubiquitin specific peptidase 40                                                          | Homo sapiens |
| 23358  | ubiquitin specific peptidase 24                                                          | Homo sapiens |
| 9736   | ubiquitin specific peptidase 34                                                          | Homo sapiens |
| 57223  | SMEK homolog 2, suppressor of mek1 (Dictyostelium)                                       | Homo sapiens |
| 84273  | chromosome 4 open reading frame 14                                                       | Homo sapiens |
| 163051 | zinc finger protein 709                                                                  | Homo sapiens |
| 51107  | anterior pharynx defective 1 homolog A (C. elegans)                                      | Homo sapiens |
| 79172  | centromere protein 0                                                                     | Homo sapiens |
| 1600   | disabled homolog 1 (Drosophila)                                                          | Homo sapiens |
| 6468   | F-box and WD repeat domain containing 4                                                  | Homo sapiens |
| 1788   | DNA (cytosine-5)-methyltransferase 3 alpha                                               | Homo sapiens |
| 8464   | suppressor of Ty 3 homolog (S. cerevisiae)                                               | Homo sapiens |
| 493911 | phosphatase, orphan 2                                                                    | Homo sapiens |
| 58477  | signal recognition particle receptor, B subunit                                          | Homo sapiens |
| 7534   | tyrosine 3-monooxygenase/tryptophan 5-monooxygenase activation protein, zeta polypeptide | Homo sapiens |
| 10300  | katanin p80 (WD repeat containing) subunit B 1                                           | Homo sapiens |
| 80097  | family with sequence similarity 128, member B                                            | Homo sapiens |
| 123283 | threonyl-tRNA synthetase-like 2                                                          | Homo sapiens |
| 55193  | polybromo 1                                                                              | Homo sapiens |
| 130589 | galactose mutarotase (aldose 1-epimerase)                                                | Homo sapiens |
| 221937 | forkhead box K1                                                                          | Homo sapiens |
| 8462   | Kruppel-like factor 11                                                                   | Homo sapiens |
| 54893  | myotubularin related protein 10                                                          | Homo sapiens |
| 5277   | phosphatidylinositol glycan anchor biosynthesis, class A                                 | Homo sapiens |
| 26577  | procollagen C-endopeptidase enhancer 2                                                   | Homo sapiens |
| 57338  | junctophilin 3                                                                           | Homo sapiens |
| 10945  | KDEL (Lys-Asp-Glu-Leu) endoplasmic reticulum protein retention receptor 1                | Homo sapiens |
| 50814  | NAD(P) dependent steroid dehydrogenase-like                                              | Homo sapiens |
| 10654  | phosphomevalonate kinase                                                                 | Homo sapiens |
| 5440   | polymerase (RNA) II (DNA directed) polypeptide K, 7.0kDa                                 | Homo sapiens |
| 79874  | rabaptin, RAB GTPase binding effector protein 2                                          | Homo sapiens |
| 54832  | vacuolar protein sorting 13 homolog C (S. cerevisiae)                                    | Homo sapiens |
| 23626  | SPO11 meiotic protein covalently bound to DSB homolog (S. cerevisiae)                    | Homo sapiens |
| 55578  | family with sequence similarity 48, member A                                             | Homo sapiens |
| 5441   | polymerase (RNA) II (DNA directed) polypeptide L, 7.6kDa                                 | Homo sapiens |
| 84294  | UTP23, small subunit (SSU) processome component, homolog (yeast)                         | Homo sapiens |
| 26022  | similar to transmembrane protein 98; transmembrane protein 98                            | Homo sapiens |
| 138050 | heparan-alpha-glucosaminide N-acetyltransferase                                          | Homo sapiens |
| 5049   | platelet-activating factor acetylhydrolase, isoform Ib, subunit 2 (30kDa)                | Homo sapiens |
| 64065  | PERP, TP53 apoptosis effector                                                            | Homo sapiens |
| 55437  | STE20-related kinase adaptor beta                                                        | Homo sapiens |
| 283454 | hypothetical protein LOC283454                                                           | Homo sapiens |
| 55086  | chromosome X open reading frame 57                                                       | Homo sapiens |
| 91942  | NADH dehydrogenase (ubiquinone) 1 alpha subcomplex, assembly factor 2                    | Homo sapiens |
| 55257  | chromosome 20 open reading frame 20                                                      | Homo sapiens |
| 1537   | cytochrome c-1                                                                           | Homo sapiens |
| 30061  | solute carrier family 40 (iron-regulated transporter), member 1                          | Homo sapiens |
| 5532   | protein phosphatase 3 (formerly 2B), catalytic subunit, beta isoform                     | Homo sapiens |
| 63826  | serine racemase                                                                          | Homo sapiens |
| 10651  | metaxin 2                                                                                | Homo sapiens |
| 26224  | F-box and leucine-rich repeat protein 3                                                  | Homo sapiens |
| 84865  | coiled-coil domain containing 142                                                        | Homo sapiens |
| 116064 | leucine rich repeat containing 58                                                        | Homo sapiens |
| 79364  | ZXD family zinc finger C                                                                 | Homo sapiens |
| 7114   | thymosin-like 2 (pseudogene); thymosin-like 1 (pseudogene); thymosin beta 4, X-linked    | Homo sapiens |
| 9753   | zinc finger and SCAN domain containing 12                                                | Homo sapiens |

|        |                                                                                                                                          |              |
|--------|------------------------------------------------------------------------------------------------------------------------------------------|--------------|
| 55291  | SAPS domain family, member 3                                                                                                             | Homo sapiens |
| 164    | adaptor-related protein complex 1, gamma 1 subunit                                                                                       | Homo sapiens |
| 57414  | rhomboid domain containing 2                                                                                                             | Homo sapiens |
| 144404 | transmembrane protein L20B                                                                                                               | Homo sapiens |
| 6738   | TROVE domain family, member 2                                                                                                            | Homo sapiens |
| 9790   | BMS1 homolog, ribosome assembly protein (yeast) pseudogene; BMS1 homolog, ribosome assembly protein (yeast)                              | Homo sapiens |
| 112487 | chromosome 14 open reading frame 126                                                                                                     | Homo sapiens |
| 55846  | integrin alpha FG-GAP repeat containing 2                                                                                                | Homo sapiens |
| 23363  | obscurin-like 1                                                                                                                          | Homo sapiens |
| 91433  | RCC1 domain containing 1                                                                                                                 | Homo sapiens |
| 473    | arginine-glutamic acid dipeptide (RE) repeats                                                                                            | Homo sapiens |
| 79085  | solute carrier family 25 (mitochondrial carrier; phosphate carrier), member 23                                                           | Homo sapiens |
| 64981  | mitochondrial ribosomal protein L34                                                                                                      | Homo sapiens |
| 57643  | zinc finger, SWIM-type containing 5                                                                                                      | Homo sapiens |
| 6818   | sulfotransferase family, cytosolic, 1A, phenol-preferring, member 4; sulfotransferase family, cytosolic, 1A, phenol-preferring, member 3 | Homo sapiens |
| 445329 | sulfotransferase family, cytosolic, 1A, phenol-preferring, member 4; sulfotransferase family, cytosolic, 1A, phenol-preferring, member 3 | Homo sapiens |
| 118812 | MORN repeat containing 4                                                                                                                 | Homo sapiens |
| 10616  | RanBP-type and C3HC4-type zinc finger containing 1                                                                                       | Homo sapiens |
| 26278  | spastic ataxia of Charlevoix-Saguenay (sacsin)                                                                                           | Homo sapiens |
| 5537   | protein phosphatase 6, catalytic subunit                                                                                                 | Homo sapiens |
| 57396  | CDC-like kinase 4                                                                                                                        | Homo sapiens |
| 51186  | WW domain binding protein 5                                                                                                              | Homo sapiens |
| 9241   | noggin                                                                                                                                   | Homo sapiens |
| 57821  | chromosome 1 open reading frame 114                                                                                                      | Homo sapiens |
| 84230  | leucine rich repeat containing 8 family, member C                                                                                        | Homo sapiens |
| 3187   | heterogeneous nuclear ribonucleoprotein H1 (H)                                                                                           | Homo sapiens |
| 114799 | establishment of cohesion 1 homolog 1 (S. cerevisiae)                                                                                    | Homo sapiens |
| 51460  | Scm-like with four mbt domains 1                                                                                                         | Homo sapiens |
| 59336  | PR domain containing 13                                                                                                                  | Homo sapiens |
| 84791  | chromosome 1 open reading frame 97                                                                                                       | Homo sapiens |
| 989    | septin 7                                                                                                                                 | Homo sapiens |
| 55833  | ubiquitin associated protein 2                                                                                                           | Homo sapiens |
| 8754   | ADAM metallopeptidase domain 9 (meltrin gamma)                                                                                           | Homo sapiens |
| 11153  | FIC domain containing                                                                                                                    | Homo sapiens |
| 55531  | ELMO/CED-12 domain containing 1                                                                                                          | Homo sapiens |
| 4649   | myosin IXA                                                                                                                               | Homo sapiens |
| 147727 | hypothetical LOC147727                                                                                                                   | Homo sapiens |
| 253725 | family with sequence similarity 21, member D; family with sequence similarity 21, member C                                               | Homo sapiens |
| 653450 | family with sequence similarity 21, member D; family with sequence similarity 21, member C                                               | Homo sapiens |
| 10783  | NIMA (never in mitosis gene a)-related kinase 6                                                                                          | Homo sapiens |
| 9910   | RAB GTPase activating protein 1-like                                                                                                     | Homo sapiens |
| 23215  | BAT2 domain containing 1                                                                                                                 | Homo sapiens |
| 5562   | protein kinase, AMP-activated, alpha 1 catalytic subunit                                                                                 | Homo sapiens |
| 25874  | brain protein 44                                                                                                                         | Homo sapiens |
| 79016  | DET1 and DDB1 associated 1                                                                                                               | Homo sapiens |
| 643911 | hCG1815491                                                                                                                               | Homo sapiens |
| 84895  | family with sequence similarity 73, member B                                                                                             | Homo sapiens |
| 5709   | proteasome (prosome, macropain) 26S subunit, non-ATPase, 3                                                                               | Homo sapiens |
| 475    | ATX1 antioxidant protein 1 homolog (yeast)                                                                                               | Homo sapiens |
| 2737   | GLI family zinc finger 3                                                                                                                 | Homo sapiens |
| 4902   | neurturin                                                                                                                                | Homo sapiens |
| 1431   | citrate synthase                                                                                                                         | Homo sapiens |
| 7586   | zinc finger with KRAB and SCAN domains 1                                                                                                 | Homo sapiens |
| 1174   | adaptor-related protein complex 1, sigma 1 subunit                                                                                       | Homo sapiens |
| 7390   | uroporphyrinogen III synthase                                                                                                            | Homo sapiens |
| 7621   | zinc finger protein 70                                                                                                                   | Homo sapiens |
| 54977  | solute carrier family 25, member 38                                                                                                      | Homo sapiens |
| 10302  | small nuclear RNA activating complex, polypeptide 5, 19kDa                                                                               | Homo sapiens |
| 64429  | zinc finger, DHHC-type containing 6                                                                                                      | Homo sapiens |
| 3156   | 3-hydroxy-3-methylglutaryl-Coenzyme A reductase                                                                                          | Homo sapiens |
| 2923   | protein disulfide isomerase family A, member 3                                                                                           | Homo sapiens |
| 27034  | acyl-Coenzyme A dehydrogenase family, member 8                                                                                           | Homo sapiens |
| 55959  | sulfatase 2                                                                                                                              | Homo sapiens |
| 55239  | 2-oxoglutarate and iron-dependent oxygenase domain containing 1                                                                          | Homo sapiens |
| 64983  | mitochondrial ribosomal protein L32                                                                                                      | Homo sapiens |
| 85462  | FH2 domain containing 1                                                                                                                  | Homo sapiens |
| 29102  | ribonuclease type III, nuclear                                                                                                           | Homo sapiens |
| 10286  | breast carcinoma amplified sequence 2                                                                                                    | Homo sapiens |
| 51366  | similar to E3 ubiquitin protein ligase, HECT domain containing, 1; ubiquitin protein ligase E3 component n-recogin 5                     | Homo sapiens |
| 7181   | nuclear receptor subfamily 2, group C, member 1                                                                                          | Homo sapiens |
| 79850  | family with sequence similarity 57, member A                                                                                             | Homo sapiens |

|        |                                                                                                               |              |
|--------|---------------------------------------------------------------------------------------------------------------|--------------|
| 51474  | LIM domain and actin binding 1                                                                                | Homo sapiens |
| 8854   | aldehyde dehydrogenase 1 family, member A2                                                                    | Homo sapiens |
| 139231 | chromosome X open reading frame 39                                                                            | Homo sapiens |
| 56180  | motile sperm domain containing 1                                                                              | Homo sapiens |
| 55705  | importin 9                                                                                                    | Homo sapiens |
| 4828   | neuromedin B                                                                                                  | Homo sapiens |
| 55917  | CTTNBP2 N-terminal like                                                                                       | Homo sapiens |
| 114926 | chromosome 8 open reading frame 40                                                                            | Homo sapiens |
| 49856  | WD repeat domain 8                                                                                            | Homo sapiens |
| 11258  | dynactin 3 (p22)                                                                                              | Homo sapiens |
| 92399  | mitochondrial ribosome recycling factor                                                                       | Homo sapiens |
| 1810   | down-regulator of transcription 1, TBP-binding (negative cofactor 2)                                          | Homo sapiens |
| 55197  | regulation of nuclear pre-mRNA domain containing 1A                                                           | Homo sapiens |
| 572558 | hypothetical locus LOC572558                                                                                  | Homo sapiens |
| 57109  | REX4, RNA exonuclease 4 homolog (S. cerevisiae)                                                               | Homo sapiens |
| 394    | Rho GTPase activating protein 5                                                                               | Homo sapiens |
| 6631   | small nuclear ribonucleoprotein polypeptide C                                                                 | Homo sapiens |
| 51182  | heat shock 70kDa protein 14                                                                                   | Homo sapiens |
| 79177  | zinc finger protein 576                                                                                       | Homo sapiens |
| 27309  | zinc finger protein 330                                                                                       | Homo sapiens |
| 84890  | 2-aminoethanethiol (cysteamine) dioxygenase                                                                   | Homo sapiens |
| 10267  | receptor (G protein-coupled) activity modifying protein 1                                                     | Homo sapiens |
| 10806  | serologically defined colon cancer antigen 8                                                                  | Homo sapiens |
| 400073 | chromosome 12 open reading frame 76                                                                           | Homo sapiens |
| 23405  | dicer 1, ribonuclease type III                                                                                | Homo sapiens |
| 166379 | Bardet-Biedl syndrome 12                                                                                      | Homo sapiens |
| 51083  | galanin prepropeptide                                                                                         | Homo sapiens |
| 3910   | laminin, alpha 4                                                                                              | Homo sapiens |
| 23673  | syntaxin 12                                                                                                   | Homo sapiens |
| 55666  | nuclear protein localization 4 homolog (S. cerevisiae)                                                        | Homo sapiens |
| 6421   | splicing factor proline/glutamine-rich (polypyrimidine tract binding protein associated)                      | Homo sapiens |
| 55170  | protein arginine methyltransferase 6                                                                          | Homo sapiens |
| 2885   | growth factor receptor-bound protein 2                                                                        | Homo sapiens |
| 348162 | hypothetical protein 348162                                                                                   | Homo sapiens |
| 7549   | zinc finger protein 2                                                                                         | Homo sapiens |
| 10151  | heterogeneous nuclear ribonucleoprotein A3 pseudogene 1                                                       | Homo sapiens |
| 58508  | myeloid/lymphoid or mixed-lineage leukemia 3                                                                  | Homo sapiens |
| 5881   | ras-related C3 botulinum toxin substrate 3 (rho family, small GTP binding protein Rac3)                       | Homo sapiens |
| 55274  | PHD finger protein 10                                                                                         | Homo sapiens |
| 29803  | replication initiator 1                                                                                       | Homo sapiens |
| 51499  | TP53 regulated inhibitor of apoptosis 1                                                                       | Homo sapiens |
| 9553   | mitochondrial ribosomal protein L33                                                                           | Homo sapiens |
| 207    | v-akt murine thymoma viral oncogene homolog 1                                                                 | Homo sapiens |
| 90693  | coiled-coil domain containing 126                                                                             | Homo sapiens |
| 79699  | zyg-11 homolog B (C. elegans)                                                                                 | Homo sapiens |
| 79184  | BRCA1/BRCA2-containing complex, subunit 3                                                                     | Homo sapiens |
| 401504 | hypothetical gene supported by AK091718                                                                       | Homo sapiens |
| 6191   | ribosomal protein S4X pseudogene 6; ribosomal protein S4X pseudogene 13; ribosomal protein S4, X-linked       | Homo sapiens |
| 5579   | protein kinase C, beta                                                                                        | Homo sapiens |
| 57678  | glycerol-3-phosphate acyltransferase, mitochondrial                                                           | Homo sapiens |
| 56994  | choline phosphotransferase 1                                                                                  | Homo sapiens |
| 84749  | ubiquitin specific peptidase 30                                                                               | Homo sapiens |
| 55635  | DEP domain containing 1                                                                                       | Homo sapiens |
| 6988   | T-cell leukemia translocation altered gene                                                                    | Homo sapiens |
| 54784  | alkB, alkylation repair homolog 4 (E. coli)                                                                   | Homo sapiens |
| 55283  | mucoilin 3                                                                                                    | Homo sapiens |
| 57448  | baculoviral IAP repeat-containing 6                                                                           | Homo sapiens |
| 142    | poly (ADP-ribose) polymerase 1                                                                                | Homo sapiens |
| 51371  | proteasome maturation protein                                                                                 | Homo sapiens |
| 112597 | hypothetical LOC541471; non-protein coding RNA 152                                                            | Homo sapiens |
| 541471 | hypothetical LOC541471; non-protein coding RNA 152                                                            | Homo sapiens |
| 3981   | ligase IV, DNA, ATP-dependent                                                                                 | Homo sapiens |
| 90362  | family with sequence similarity 110, member B                                                                 | Homo sapiens |
| 11154  | adaptor-related protein complex 4, sigma 1 subunit                                                            | Homo sapiens |
| 10100  | tetraspanin 2                                                                                                 | Homo sapiens |
| 199692 | zinc finger protein 627                                                                                       | Homo sapiens |
| 23366  | KIAA0895                                                                                                      | Homo sapiens |
| 6183   | mitochondrial ribosomal protein S12                                                                           | Homo sapiens |
| 256435 | ST6 (alpha-N-acetyl-neuraminyl-2,3-beta-galactosyl-1,3)-N-acetylgalactosaminide alpha-2,6-sialyltransferase 3 | Homo sapiens |
| 55844  | protein phosphatase 2, regulatory subunit B, delta isoform                                                    | Homo sapiens |
| 7368   | UDP glycosyltransferase 8                                                                                     | Homo sapiens |
| 57695  | ubiquitin specific peptidase 37                                                                               | Homo sapiens |
| 23071  | endoplasmic reticulum protein 44                                                                              | Homo sapiens |
| 3336   | heat shock 10kDa protein 1 (chaperonin 10)                                                                    | Homo sapiens |
| 23301  | EH domain binding protein 1                                                                                   | Homo sapiens |

|        |                                                                                                                                                              |              |
|--------|--------------------------------------------------------------------------------------------------------------------------------------------------------------|--------------|
| 8473   | O-linked N-acetylglucosamine (GlcNAc) transferase (UDP-N-acetylglucosamine:polypeptide-N-acetylglucosaminyl transferase)                                     | Homo sapiens |
| 1415   | crystallin, beta B2                                                                                                                                          | Homo sapiens |
| 63971  | kinesin family member 13A                                                                                                                                    | Homo sapiens |
| 51430  | chromosome 1 open reading frame 9                                                                                                                            | Homo sapiens |
| 23660  | zinc finger with KRAB and SCAN domains 5                                                                                                                     | Homo sapiens |
| 65980  | bromodomain containing 9                                                                                                                                     | Homo sapiens |
| 11332  | acyl-CoA thioesterase 7                                                                                                                                      | Homo sapiens |
| 121355 | gametocyte specific factor 1                                                                                                                                 | Homo sapiens |
| 10155  | tripartite motif-containing 28                                                                                                                               | Homo sapiens |
| 11108  | PR domain containing 4                                                                                                                                       | Homo sapiens |
| 8543   | LIM domain only 4                                                                                                                                            | Homo sapiens |
| 406991 | microRNA 21                                                                                                                                                  | Homo sapiens |
| 374969 | coiled-coil domain containing 23                                                                                                                             | Homo sapiens |
| 115939 | chromosome 16 open reading frame 42                                                                                                                          | Homo sapiens |
| 1452   | casein kinase 1, alpha 1                                                                                                                                     | Homo sapiens |
| 158586 | zinc finger, X-linked, duplicated B                                                                                                                          | Homo sapiens |
| 84342  | peptide deformylase (mitochondrial); component of oligomeric golgi complex 8                                                                                 | Homo sapiens |
| 64146  | peptide deformylase (mitochondrial); component of oligomeric golgi complex 8                                                                                 | Homo sapiens |
| 50484  | ribonucleotide reductase M2 B (TP53 inducible)                                                                                                               | Homo sapiens |
| 29979  | ubiquilin 1                                                                                                                                                  | Homo sapiens |
| 1870   | E2F transcription factor 2                                                                                                                                   | Homo sapiens |
| 122525 | chromosome 14 open reading frame 28                                                                                                                          | Homo sapiens |
| 84750  | fucosyltransferase 10 (alpha (1,3) fucosyltransferase)                                                                                                       | Homo sapiens |
| 8125   | hepatopoietin PCn127; acidic (leucine-rich) nuclear phosphoprotein 32 family, member A                                                                       | Homo sapiens |
| 84135  | UTP15, U3 small nucleolar ribonucleoprotein, homolog (S. cerevisiae)                                                                                         | Homo sapiens |
| 4714   | NADH dehydrogenase (ubiquinone) 1 beta subcomplex, 8, 19kDa                                                                                                  | Homo sapiens |
| 54733  | solute carrier family 35, member F2                                                                                                                          | Homo sapiens |
| 56257  | methylphosphate capping enzyme                                                                                                                               | Homo sapiens |
| 10212  | DEAD (Asp-Glu-Ala-Asp) box polypeptide 39                                                                                                                    | Homo sapiens |
| 23049  | SMG1 homolog, phosphatidylinositol 3-kinase-related kinase (C. elegans)                                                                                      | Homo sapiens |
| 729570 | hypothetical LOC729570                                                                                                                                       | Homo sapiens |
| 5707   | proteasome (prosome, macropain) 26S subunit, non-ATPase, 1                                                                                                   | Homo sapiens |
| 55761  | tetratricopeptide repeat domain 17                                                                                                                           | Homo sapiens |
| 84146  | zinc finger protein 644                                                                                                                                      | Homo sapiens |
| 728642 | similar to cell division cycle 2-like 1 (PITSLRE proteins); cell division cycle 2-like 1 (PITSLRE proteins); cell division cycle 2-like 2 (PITSLRE proteins) | Homo sapiens |
| 55334  | solute carrier family 39 (zinc transporter), member 9                                                                                                        | Homo sapiens |
| 439911 | hypothetical gene supported by NM_194304                                                                                                                     | Homo sapiens |
| 29767  | tropomodulin 2 (neuronal)                                                                                                                                    | Homo sapiens |
| 6647   | superoxide dismutase 1, soluble                                                                                                                              | Homo sapiens |
| 25913  | POT1 protection of telomeres 1 homolog (S. pombe)                                                                                                            | Homo sapiens |
| 9140   | ATG12 autophagy related 12 homolog (S. cerevisiae)                                                                                                           | Homo sapiens |
| 84823  | lamin B2                                                                                                                                                     | Homo sapiens |
| 5873   | RAB27A, member RAS oncogene family                                                                                                                           | Homo sapiens |
| 29927  | Sec61 alpha 1 subunit (S. cerevisiae)                                                                                                                        | Homo sapiens |
| 54438  | glucose-fructose oxidoreductase domain containing 1                                                                                                          | Homo sapiens |
| 10409  | brain abundant, membrane attached signal protein 1                                                                                                           | Homo sapiens |
| 7936   | RD RNA binding protein                                                                                                                                       | Homo sapiens |
| 5564   | protein kinase, AMP-activated, beta 1 non-catalytic subunit                                                                                                  | Homo sapiens |
| 79966  | stearoyl-CoA desaturase 5                                                                                                                                    | Homo sapiens |
| 10199  | M-phase phosphoprotein 10 (U3 small nucleolar ribonucleoprotein)                                                                                             | Homo sapiens |
| 4751   | NIMA (never in mitosis gene a)-related kinase 2                                                                                                              | Homo sapiens |
| 267004 | piggyBac transposable element derived 3                                                                                                                      | Homo sapiens |
| 3092   | huntingtin interacting protein 1                                                                                                                             | Homo sapiens |
| 9360   | peptidylprolyl isomerase G (cyclophilin G)                                                                                                                   | Homo sapiens |
| 90231  | KIAA2013; hypothetical LOC728138                                                                                                                             | Homo sapiens |
| 51626  | dynein, cytoplasmic 2, light intermediate chain 1                                                                                                            | Homo sapiens |
| 51133  | potassium channel tetramerisation domain containing 3                                                                                                        | Homo sapiens |
| 5591   | similar to protein kinase, DNA-activated, catalytic polypeptide; protein kinase, DNA-activated, catalytic polypeptide                                        | Homo sapiens |
| 79577  | cell division cycle 73, Paf1/RNA polymerase II complex component, homolog (S. cerevisiae)                                                                    | Homo sapiens |
| 7852   | chemokine (C-X-C motif) receptor 4                                                                                                                           | Homo sapiens |
| 91369  | ankyrin repeat domain 40                                                                                                                                     | Homo sapiens |
| 23244  | PDS5, regulator of cohesion maintenance, homolog A (S. cerevisiae)                                                                                           | Homo sapiens |
| 57539  | WD repeat domain 35                                                                                                                                          | Homo sapiens |
| 399491 | GPS, PLAT and transmembrane domain-containing protein                                                                                                        | Homo sapiens |
| 57669  | erythrocyte membrane protein band 4.1 like 5                                                                                                                 | Homo sapiens |
| 440354 | PI-3-kinase-related kinase SMG-1 pseudogene                                                                                                                  | Homo sapiens |
| 595101 | PI-3-kinase-related kinase SMG-1 pseudogene                                                                                                                  | Homo sapiens |
| 389    | ras homolog gene family, member C                                                                                                                            | Homo sapiens |
| 55920  | regulator of chromosome condensation 2                                                                                                                       | Homo sapiens |
| 79135  | apolipoprotein 0                                                                                                                                             | Homo sapiens |
| 54664  | transmembrane protein 106B                                                                                                                                   | Homo sapiens |
| 51742  | AT rich interactive domain 4B (RBP1-like)                                                                                                                    | Homo sapiens |
| 79621  | ribonuclease H2, subunit B                                                                                                                                   | Homo sapiens |

|        |                                                                                                                                                         |              |
|--------|---------------------------------------------------------------------------------------------------------------------------------------------------------|--------------|
| 123016 | tetratricopeptide repeat domain 8                                                                                                                       | Homo sapiens |
| 55975  | kelch-like 7 (Drosophila)                                                                                                                               | Homo sapiens |
| 4092   | SMAD family member 7                                                                                                                                    | Homo sapiens |
| 79794  | chromosome 12 open reading frame 49                                                                                                                     | Homo sapiens |
| 9397   | N-myristoyltransferase 2                                                                                                                                | Homo sapiens |
| 23229  | Cdc42 guanine nucleotide exchange factor (GEF) 9; hypothetical protein LOC100134381                                                                     | Homo sapiens |
| 23001  | WD repeat and FYVE domain containing 3                                                                                                                  | Homo sapiens |
| 5306   | phosphatidylinositol transfer protein, alpha                                                                                                            | Homo sapiens |
| 8930   | methyl-CpG binding domain protein 4                                                                                                                     | Homo sapiens |
| 25902  | methylenetetrahydrofolate dehydrogenase (NADP+ dependent) 1-like                                                                                        | Homo sapiens |
| 23647  | ADP-ribosylation factor interacting protein 2                                                                                                           | Homo sapiens |
| 54583  | egl nine homolog 1 (C. elegans)                                                                                                                         | Homo sapiens |
| 57690  | trinucleotide repeat containing 6C                                                                                                                      | Homo sapiens |
| 3326   | heat shock protein 90kDa alpha (cytosolic), class B member 1                                                                                            | Homo sapiens |
| 8897   | myotubularin related protein 3                                                                                                                          | Homo sapiens |
| 142891 | sterile alpha motif domain containing 8                                                                                                                 | Homo sapiens |
| 133308 | Na+/H+ exchanger domain containing 2                                                                                                                    | Homo sapiens |
| 84908  | family with sequence similarity 136, member A                                                                                                           | Homo sapiens |
| 4298   | myeloid/lymphoid or mixed-lineage leukemia (trithorax homolog, Drosophila); translocated to, 1                                                          | Homo sapiens |
| 57798  | GATA zinc finger domain containing 1                                                                                                                    | Homo sapiens |
| 84240  | zinc finger, CCHC domain containing 9                                                                                                                   | Homo sapiens |
| 79023  | nucleoporin 37kDa                                                                                                                                       | Homo sapiens |
| 79133  | chromosome 20 open reading frame 7                                                                                                                      | Homo sapiens |
| 255967 | PAN3 poly(A) specific ribonuclease subunit homolog (S. cerevisiae)                                                                                      | Homo sapiens |
| 4067   | v-yes-1 Yamaguchi sarcoma viral related oncogene homolog                                                                                                | Homo sapiens |
| 6185   | ribophorin II                                                                                                                                           | Homo sapiens |
| 79081  | chromosome 11 open reading frame 48                                                                                                                     | Homo sapiens |
| 55435  | chromosome 4 open reading frame 16                                                                                                                      | Homo sapiens |
| 6389   | succinate dehydrogenase complex, subunit A, flavoprotein (Fp)                                                                                           | Homo sapiens |
| 51493  | chromosome 22 open reading frame 28                                                                                                                     | Homo sapiens |
| 65117  | arginine/serine-rich coiled-coil 2                                                                                                                      | Homo sapiens |
| 4335   | MAX binding protein                                                                                                                                     | Homo sapiens |
| 9552   | sperm associated antigen 7                                                                                                                              | Homo sapiens |
| 4711   | NADH dehydrogenase (ubiquinone) 1 beta subcomplex, 5, 16kDa                                                                                             | Homo sapiens |
| 30000  | transportin 2                                                                                                                                           | Homo sapiens |
| 10061  | ATP-binding cassette, sub-family F (GCN20), member 2                                                                                                    | Homo sapiens |
| 1946   | ephrin-A5                                                                                                                                               | Homo sapiens |
| 64772  | endo-beta-N-acetylglucosaminidase                                                                                                                       | Homo sapiens |
| 5718   | proteasome (prosome, macropain) 26S subunit, non-ATPase, 12                                                                                             | Homo sapiens |
| 178    | amylo-1, 6-glucosidase, 4-alpha-glucanotransferase                                                                                                      | Homo sapiens |
| 132320 | sodium channel and clathrin linker 1                                                                                                                    | Homo sapiens |
| 26127  | FGFR1 oncogene partner 2                                                                                                                                | Homo sapiens |
| 6845   | vesicle-associated membrane protein 7                                                                                                                   | Homo sapiens |
| 55148  | ubiquitin protein ligase E3 component n-recogin 7 (putative)                                                                                            | Homo sapiens |
| 10535  | ribonuclease H2, subunit A                                                                                                                              | Homo sapiens |
| 518    | ATP synthase, H+ transporting, mitochondrial FO complex, subunit C3 (subunit 9)                                                                         | Homo sapiens |
| 23029  | RNA binding motif protein 34                                                                                                                            | Homo sapiens |
| 55002  | transmembrane and coiled-coil domains 3                                                                                                                 | Homo sapiens |
| 5468   | peroxisome proliferator-activated receptor gamma                                                                                                        | Homo sapiens |
| 375260 | WAS protein family homolog 3 pseudogene; WAS protein family homolog 2 pseudogene; WAS protein family homolog 1; WAS protein family homolog 5 pseudogene | Homo sapiens |
| 653635 | WAS protein family homolog 3 pseudogene; WAS protein family homolog 2 pseudogene; WAS protein family homolog 1; WAS protein family homolog 5 pseudogene | Homo sapiens |
| 374666 | WAS protein family homolog 3 pseudogene; WAS protein family homolog 2 pseudogene; WAS protein family homolog 1; WAS protein family homolog 5 pseudogene | Homo sapiens |
| 10390  | choline/ethanolamine phosphotransferase 1                                                                                                               | Homo sapiens |
| 8943   | adaptor-related protein complex 3, delta 1 subunit                                                                                                      | Homo sapiens |
| 55893  | zinc finger protein 395                                                                                                                                 | Homo sapiens |
| 4947   | ornithine decarboxylase antizyme 2                                                                                                                      | Homo sapiens |
| 9791   | phosphatidylserine synthase 1                                                                                                                           | Homo sapiens |
| 23137  | structural maintenance of chromosomes 5                                                                                                                 | Homo sapiens |
| 25936  | NSL1, MIND kinetochore complex component, homolog (S. cerevisiae)                                                                                       | Homo sapiens |
| 8481   | oral-facial-digital syndrome 1                                                                                                                          | Homo sapiens |
| 64949  | mitochondrial ribosomal protein S26                                                                                                                     | Homo sapiens |
| 84267  | chromosome 9 open reading frame 64                                                                                                                      | Homo sapiens |
| 7247   | translin                                                                                                                                                | Homo sapiens |
| 26092  | torsin A interacting protein 1                                                                                                                          | Homo sapiens |
| 144108 | SPT2, Suppressor of Ty, domain containing 1 (S. cerevisiae)                                                                                             | Homo sapiens |
| 51504  | tRNA methyltransferase 11-2 homolog (S. cerevisiae); similar to CG12975                                                                                 | Homo sapiens |
| 80312  | tet oncogene 1                                                                                                                                          | Homo sapiens |
| 55684  | chromosome 9 open reading frame 86                                                                                                                      | Homo sapiens |
| 80135  | brix domain containing 5                                                                                                                                | Homo sapiens |
| 51678  | membrane protein, palmitoylated 6 (MAGUK p55 subfamily member 6)                                                                                        | Homo sapiens |
| 140775 | Smith-Magenis syndrome chromosome region, candidate 8                                                                                                   | Homo sapiens |
| 57122  | nucleoporin 107kDa                                                                                                                                      | Homo sapiens |
| 4676   | nucleosome assembly protein 1-like 4                                                                                                                    | Homo sapiens |

|           |                                                                                                                               |              |
|-----------|-------------------------------------------------------------------------------------------------------------------------------|--------------|
| 898       | cyclin E1                                                                                                                     | Homo sapiens |
| 64397     | zinc finger protein 106 homolog (mouse)                                                                                       | Homo sapiens |
| 55109     | angiogenic factor with G patch and FHA domains 1                                                                              | Homo sapiens |
| 27031     | nephronophthisis 3 (adolescent); acyl-Coenzyme A dehydrogenase family, member 11                                              | Homo sapiens |
| 84129     | nephronophthisis 3 (adolescent); acyl-Coenzyme A dehydrogenase family, member 11                                              | Homo sapiens |
| 64924     | solute carrier family 30 (zinc transporter), member 5                                                                         | Homo sapiens |
| 23645     | protein phosphatase 1, regulatory (inhibitor) subunit 15A                                                                     | Homo sapiens |
| 445571    | COBW domain containing 5; similar to COBW domain containing 1; COBW domain containing 7; COBW domain containing 3             | Homo sapiens |
| 728013    | COBW domain containing 5; similar to COBW domain containing 1; COBW domain containing 7; COBW domain containing 3             | Homo sapiens |
| 220869    | COBW domain containing 5; similar to COBW domain containing 1; COBW domain containing 7; COBW domain containing 3             | Homo sapiens |
| 57509     | mitochondrial tumor suppressor 1                                                                                              | Homo sapiens |
| 27291     | chromosome 10 open reading frame 28                                                                                           | Homo sapiens |
| 8704      | UDP-Gal:betaGlcNAc beta 1,4- galactosyltransferase, polypeptide 2                                                             | Homo sapiens |
| 51512     | G-2 and S-phase expressed 1                                                                                                   | Homo sapiens |
| 28966     | sorting nexin 24                                                                                                              | Homo sapiens |
| 6944      | vacuolar protein sorting 72 homolog (S. cerevisiae)                                                                           | Homo sapiens |
| 57700     | family with sequence similarity 160, member B1                                                                                | Homo sapiens |
| 9761      | malectin                                                                                                                      | Homo sapiens |
| 55317     | chromosome 20 open reading frame 29                                                                                           | Homo sapiens |
| 84952     | cingulin-like 1                                                                                                               | Homo sapiens |
| 54998     | aurora kinase A interacting protein 1                                                                                         | Homo sapiens |
| 205564    | SUMO1/sentrin specific peptidase 5                                                                                            | Homo sapiens |
| 24149     | zinc finger protein 318                                                                                                       | Homo sapiens |
| 348093    | RNA binding protein with multiple splicing 2                                                                                  | Homo sapiens |
| 85301     | collagen, type XXVII, alpha 1                                                                                                 | Homo sapiens |
| 2936      | glutathione reductase                                                                                                         | Homo sapiens |
| 51272     | blocked early in transport 1 homolog (S. cerevisiae)-like                                                                     | Homo sapiens |
| 6715      | steroid-5-alpha-reductase, alpha polypeptide 1 (3-oxo-5 alpha-steroid delta 4-dehydrogenase alpha 1)                          | Homo sapiens |
| 8666      | eukaryotic translation initiation factor 3, subunit G                                                                         | Homo sapiens |
| 5987      | tripartite motif-containing 27                                                                                                | Homo sapiens |
| 8846      | alkB, alkylation repair homolog 1 (E. coli)                                                                                   | Homo sapiens |
| 113246    | chromosome 12 open reading frame 57                                                                                           | Homo sapiens |
| 9792      | SERTA domain containing 2                                                                                                     | Homo sapiens |
| 389072    | pleckstrin homology domain containing, family M, member 3                                                                     | Homo sapiens |
| 7328      | ubiquitin-conjugating enzyme E2H (UBC8 homolog, yeast)                                                                        | Homo sapiens |
| 5082      | phosducin-like                                                                                                                | Homo sapiens |
| 81620     | chromatin licensing and DNA replication factor 1                                                                              | Homo sapiens |
| 26146     | TNF receptor-associated factor 3 interacting protein 1                                                                        | Homo sapiens |
| 9158      | fibroblast growth factor (acidic) intracellular binding protein                                                               | Homo sapiens |
| 670       | biphenyl hydrolase-like (serine hydrolase)                                                                                    | Homo sapiens |
| 80789     | integrator complex subunit 5                                                                                                  | Homo sapiens |
| 22877     | MLX interacting protein                                                                                                       | Homo sapiens |
| 131870    | nudix (nucleoside diphosphate linked moiety X)-type motif 16                                                                  | Homo sapiens |
| 23195     | MDN1, midasin homolog (yeast)                                                                                                 | Homo sapiens |
| 134145    | family with sequence similarity 173, member B                                                                                 | Homo sapiens |
| 5702      | proteasome (prosome, macropain) 26S subunit, ATPase, 3                                                                        | Homo sapiens |
| 26524     | LATS, large tumor suppressor, homolog 2 (Drosophila)                                                                          | Homo sapiens |
| 79056     | proline rich Gla (G-carboxyglutamic acid) 4 (transmembrane)                                                                   | Homo sapiens |
| 51018     | ribosomal RNA processing 15 homolog (S. cerevisiae)                                                                           | Homo sapiens |
| 55032     | solute carrier family 35, member A5                                                                                           | Homo sapiens |
| 2959      | general transcription factor IIB                                                                                              | Homo sapiens |
| 5939      | RNA binding motif, single stranded interacting protein 2; RNA binding motif, single stranded interacting protein 2 pseudogene | Homo sapiens |
| 339123    | jumonji domain containing 8                                                                                                   | Homo sapiens |
| 56895     | 1-acylglycerol-3-phosphate O-acyltransferase 4 (lysophosphatidic acid acyltransferase, delta)                                 | Homo sapiens |
| 7014      | telomeric repeat binding factor 2                                                                                             | Homo sapiens |
| 4853      | Notch homolog 2 (Drosophila)                                                                                                  | Homo sapiens |
| 64343     | 5-azacytidine induced 2                                                                                                       | Homo sapiens |
| 23566     | lysophosphatidic acid receptor 3                                                                                              | Homo sapiens |
| 22954     | tripartite motif-containing 32                                                                                                | Homo sapiens |
| 226       | aldolase A, fructose-bisphosphate                                                                                             | Homo sapiens |
| 4708      | NADH dehydrogenase (ubiquinone) 1 beta subcomplex, 2, 8kDa                                                                    | Homo sapiens |
| 7410      | vav 2 guanine nucleotide exchange factor                                                                                      | Homo sapiens |
| 9584      | similar to RNA binding motif protein 39; RNA binding motif protein 39                                                         | Homo sapiens |
| 29080     | coiled-coil domain containing 59                                                                                              | Homo sapiens |
| 84458     | ligand dependent nuclear receptor corepressor                                                                                 | Homo sapiens |
| 100128731 | dolichyl-diphosphooligosaccharide--protein glycosyltransferase subunit 4                                                      | Homo sapiens |
| 728888    | similar to acyl-CoA synthetase medium-chain family member 2                                                                   | Homo sapiens |
| 84285     | eukaryotic translation initiation factor 1A domain containing                                                                 | Homo sapiens |
| 64418     | transmembrane protein 168                                                                                                     | Homo sapiens |
| 79038     | zinc finger, FYVE domain containing 21                                                                                        | Homo sapiens |
| 55794     | DEAD (Asp-Glu-Ala-Asp) box polypeptide 28                                                                                     | Homo sapiens |

|        |                                                                                                                                                   |              |
|--------|---------------------------------------------------------------------------------------------------------------------------------------------------|--------------|
| 91252  | solute carrier family 39 (zinc transporter), member 13                                                                                            | Homo sapiens |
| 7706   | tripartite motif-containing 25                                                                                                                    | Homo sapiens |
| 389541 | chromosome 7 open reading frame 59                                                                                                                | Homo sapiens |
| 54926  | ubiquitin-conjugating enzyme E2R 2                                                                                                                | Homo sapiens |
| 116496 | family with sequence similarity 129, member A                                                                                                     | Homo sapiens |
| 4686   | nuclear cap binding protein subunit 1, 80kDa                                                                                                      | Homo sapiens |
| 23450  | splicing factor 3b, subunit 3, 130kDa                                                                                                             | Homo sapiens |
| 8493   | protein phosphatase 1D magnesium-dependent, delta isoform                                                                                         | Homo sapiens |
| 10634  | growth arrest-specific 2 like 1                                                                                                                   | Homo sapiens |
| 7874   | ubiquitin specific peptidase 7 (herpes virus-associated)                                                                                          | Homo sapiens |
| 84916  | cirrhosis, autosomal recessive 1A (cirhin)                                                                                                        | Homo sapiens |
| 1978   | eukaryotic translation initiation factor 4E binding protein 1                                                                                     | Homo sapiens |
| 85379  | KIAA1671 protein                                                                                                                                  | Homo sapiens |
| 730094 | chromosome 16 open reading frame 52                                                                                                               | Homo sapiens |
| 7764   | zinc finger protein 217                                                                                                                           | Homo sapiens |
| 689    | basic transcription factor 3; basic transcription factor 3, like 1 pseudogene                                                                     | Homo sapiens |
| 80194  | transmembrane protein 134                                                                                                                         | Homo sapiens |
| 6942   | transcription factor 20 (AR1)                                                                                                                     | Homo sapiens |
| 5533   | protein phosphatase 3 (formerly 2B), catalytic subunit, gamma isoform                                                                             | Homo sapiens |
| 6049   | ring finger protein (C3H2C3 type) 6                                                                                                               | Homo sapiens |
| 55832  | cullin-associated and neddylation-dissociated 1                                                                                                   | Homo sapiens |
| 7015   | telomerase reverse transcriptase                                                                                                                  | Homo sapiens |
| 220594 | TL132 protein                                                                                                                                     | Homo sapiens |
| 79751  | solute carrier family 25 (mitochondrial carrier: glutamate), member 22                                                                            | Homo sapiens |
| 54476  | ring finger protein 216                                                                                                                           | Homo sapiens |
| 55818  | lysine (K)-specific demethylase 3A                                                                                                                | Homo sapiens |
| 7905   | receptor accessory protein 5                                                                                                                      | Homo sapiens |
| 11319  | ecdysoneless homolog (Drosophila)                                                                                                                 | Homo sapiens |
| 6169   | ribosomal protein L38                                                                                                                             | Homo sapiens |
| 22841  | RAB11 family interacting protein 2 (class I)                                                                                                      | Homo sapiens |
| 378938 | metastasis associated lung adenocarcinoma transcript 1 (non-protein coding)                                                                       | Homo sapiens |
| 81488  | glutamate receptor, ionotropic, N-methyl D-aspartate-like 1B; glutamate receptor, ionotropic, N-methyl D-aspartate-like 1A; GRINL1A complex locus | Homo sapiens |
| 145781 | glutamate receptor, ionotropic, N-methyl D-aspartate-like 1B; glutamate receptor, ionotropic, N-methyl D-aspartate-like 1A; GRINL1A complex locus | Homo sapiens |
| 10570  | dihydropyrimidinase-like 4                                                                                                                        | Homo sapiens |
| 11261  | calcium binding protein P22                                                                                                                       | Homo sapiens |
| 60673  | chromosome 12 open reading frame 44                                                                                                               | Homo sapiens |
| 2962   | general transcription factor IIF, polypeptide 1, 74kDa                                                                                            | Homo sapiens |
| 2184   | fumarylacetoacetate hydrolase (fumarylacetoacetase)                                                                                               | Homo sapiens |
| 91461  | protein kinase-like protein Sgk493                                                                                                                | Homo sapiens |
| 29081  | methyltransferase like 5                                                                                                                          | Homo sapiens |
| 51042  | zinc finger protein 593                                                                                                                           | Homo sapiens |
| 4174   | minichromosome maintenance complex component 5                                                                                                    | Homo sapiens |
| 6048   | ring finger protein 5; ring finger protein 5 pseudogene 1                                                                                         | Homo sapiens |
| 80212  | coiled-coil domain containing 92                                                                                                                  | Homo sapiens |
| 79665  | similar to DEAH (Asp-Glu-Ala-His) box polypeptide 40; DEAH (Asp-Glu-Ala-His) box polypeptide 40                                                   | Homo sapiens |
| 10741  | retinoblastoma binding protein 9                                                                                                                  | Homo sapiens |
| 79042  | tRNA splicing endonuclease 34 homolog (S. cerevisiae)                                                                                             | Homo sapiens |
| 78996  | chromosome 7 open reading frame 49                                                                                                                | Homo sapiens |
| 10597  | trafficking protein particle complex 2; trafficking protein particle complex 2 pseudogene 1                                                       | Homo sapiens |
| 6399   | trafficking protein particle complex 2; trafficking protein particle complex 2 pseudogene 1                                                       | Homo sapiens |
| 29957  | solute carrier family 25 (mitochondrial carrier; phosphate carrier), member 24                                                                    | Homo sapiens |
| 55608  | ankyrin repeat domain 10                                                                                                                          | Homo sapiens |
| 79675  | FAST kinase domains 1                                                                                                                             | Homo sapiens |
| 79191  | iroquois homeobox 3                                                                                                                               | Homo sapiens |
| 3237   | homeobox D11                                                                                                                                      | Homo sapiens |
| 1201   | ceroid-lipofuscinosis, neuronal 3                                                                                                                 | Homo sapiens |
| 22944  | KIN, antigenic determinant of recA protein homolog (mouse)                                                                                        | Homo sapiens |
| 29090  | chromosome 18 open reading frame 55                                                                                                               | Homo sapiens |
| 9355   | LIM homeobox 2                                                                                                                                    | Homo sapiens |
| 51593  | serrate RNA effector molecule homolog (Arabidopsis)                                                                                               | Homo sapiens |
| 5480   | peptidylprolyl isomerase C (cyclophilin C)                                                                                                        | Homo sapiens |
| 51199  | ninein (GSK3B interacting protein)                                                                                                                | Homo sapiens |
| 375346 | transmembrane protein 110; musculoskeletal, embryonic nuclear protein 1                                                                           | Homo sapiens |
| 9475   | Rho-associated, coiled-coil containing protein kinase 2                                                                                           | Homo sapiens |
| 3028   | hydroxysteroid (17-beta) dehydrogenase 10                                                                                                         | Homo sapiens |
| 5516   | protein phosphatase 2 (formerly 2A), catalytic subunit, beta isoform                                                                              | Homo sapiens |
| 81037  | CLPTM1-like                                                                                                                                       | Homo sapiens |
| 3054   | host cell factor C1 (VP16-accessory protein)                                                                                                      | Homo sapiens |
| 572    | BCL2-associated agonist of cell death                                                                                                             | Homo sapiens |
| 130507 | ubiquitin protein ligase E3 component n-recognin 3 (putative)                                                                                     | Homo sapiens |
| 79817  | MOB1, Mps One Binder kinase activator-like 2B (yeast)                                                                                             | Homo sapiens |
| 25807  | rhomboid domain containing 3                                                                                                                      | Homo sapiens |

|           |                                                                                                                                                                                                  |              |
|-----------|--------------------------------------------------------------------------------------------------------------------------------------------------------------------------------------------------|--------------|
| 27        | v-abl Abelson murine leukemia viral oncogene homolog 2 (arg, Abelson-related gene)                                                                                                               | Homo sapiens |
| 5292      | pim-1 oncogene                                                                                                                                                                                   | Homo sapiens |
| 3920      | lysosomal-associated membrane protein 2                                                                                                                                                          | Homo sapiens |
| 3281      | heat shock factor binding protein 1                                                                                                                                                              | Homo sapiens |
| 11191     | phosphatase and tensin homolog; phosphatase and tensin homolog pseudogene 1                                                                                                                      | Homo sapiens |
| 5728      | phosphatase and tensin homolog; phosphatase and tensin homolog pseudogene 1                                                                                                                      | Homo sapiens |
| 4752      | NIMA (never in mitosis gene a)-related kinase 3                                                                                                                                                  | Homo sapiens |
| 9801      | mitochondrial ribosomal protein L19                                                                                                                                                              | Homo sapiens |
| 8476      | CDC42 binding protein kinase alpha (DMPK-like)                                                                                                                                                   | Homo sapiens |
| 5700      | proteasome (prosome, macropain) 26S subunit, ATPase, 1; similar to protease (prosome, macropain) 26S subunit, ATPase 1                                                                           | Homo sapiens |
| 4718      | NADH dehydrogenase (ubiquinone) 1, subcomplex unknown, 2, 14.5kDa                                                                                                                                | Homo sapiens |
| 728825    | similar to SMT3 suppressor of mif two 3 homolog 2 pseudogene                                                                                                                                     | Homo sapiens |
| 25914     | rotatin                                                                                                                                                                                          | Homo sapiens |
| 6726      | signal recognition particle 9-like 1; signal recognition particle 9kDa                                                                                                                           | Homo sapiens |
| 219743    | trypsin domain containing 1                                                                                                                                                                      | Homo sapiens |
| 64121     | Ras-related GTP binding C                                                                                                                                                                        | Homo sapiens |
| 100101267 | POM121 membrane glycoprotein C; POM121 membrane glycoprotein B (pseudogene)                                                                                                                      | Homo sapiens |
| 503639    | double homeobox A pseudogene 10                                                                                                                                                                  | Homo sapiens |
| 2189      | Fanconi anemia, complementation group G                                                                                                                                                          | Homo sapiens |
| 26036     | zinc finger protein 451                                                                                                                                                                          | Homo sapiens |
| 54465     | Ewing tumor-associated antigen 1                                                                                                                                                                 | Homo sapiens |
| 23370     | Rho/Rac guanine nucleotide exchange factor (GEF) 18                                                                                                                                              | Homo sapiens |
| 10245     | translocase of inner mitochondrial membrane 17 homolog B (yeast)                                                                                                                                 | Homo sapiens |
| 26119     | low density lipoprotein receptor adaptor protein 1                                                                                                                                               | Homo sapiens |
| 51560     | RAB6B, member RAS oncogene family                                                                                                                                                                | Homo sapiens |
| 6304      | SATB homeobox 1                                                                                                                                                                                  | Homo sapiens |
| 5714      | proteasome (prosome, macropain) 26S subunit, non-ATPase, 8                                                                                                                                       | Homo sapiens |
| 55813     | UTP6, small subunit (SSU) processome component, homolog (yeast)                                                                                                                                  | Homo sapiens |
| 26355     | family with sequence similarity 162, member A                                                                                                                                                    | Homo sapiens |
| 221002    | RasGEF domain family, member 1A                                                                                                                                                                  | Homo sapiens |
| 53615     | methyl-CpG binding domain protein 3                                                                                                                                                              | Homo sapiens |
| 400961    | poly(A) binding protein interacting protein 2B                                                                                                                                                   | Homo sapiens |
| 79884     | microtubule-associated protein 9                                                                                                                                                                 | Homo sapiens |
| 10466     | component of oligomeric golgi complex 5                                                                                                                                                          | Homo sapiens |
| 51234     | transmembrane protein 85                                                                                                                                                                         | Homo sapiens |
| 83903     | germ cell associated 2 (haspin)                                                                                                                                                                  | Homo sapiens |
| 7443      | vaccinia related kinase 1                                                                                                                                                                        | Homo sapiens |
| 51614     | ERGIC and golgi 3                                                                                                                                                                                | Homo sapiens |
| 4695      | NADH dehydrogenase (ubiquinone) 1 alpha subcomplex, 2, 8kDa                                                                                                                                      | Homo sapiens |
| 80154     | hypothetical LOC80154                                                                                                                                                                            | Homo sapiens |
| 145553    | magnesium-dependent phosphatase 1                                                                                                                                                                | Homo sapiens |
| 90809     | transmembrane protein 55B                                                                                                                                                                        | Homo sapiens |
| 5889      | RAD51 homolog C (S. cerevisiae)                                                                                                                                                                  | Homo sapiens |
| 8409      | ubiquitously-expressed transcript                                                                                                                                                                | Homo sapiens |
| 55603     | family with sequence similarity 46, member A                                                                                                                                                     | Homo sapiens |
| 51659     | GINS complex subunit 2 (Psf2 homolog)                                                                                                                                                            | Homo sapiens |
| 79989     | tetratricopeptide repeat domain 26                                                                                                                                                               | Homo sapiens |
| 339500    | zinc finger protein 678                                                                                                                                                                          | Homo sapiens |
| 1643      | damage-specific DNA binding protein 2, 48kDa                                                                                                                                                     | Homo sapiens |
| 84336     | transmembrane protein 101                                                                                                                                                                        | Homo sapiens |
| 114805    | UDP-N-acetyl-alpha-D-galactosamine:polypeptide N-acetylgalactosaminyltransferase 13 (GalNAc-T13); UDP-N-acetyl-alpha-D-galactosamine:polypeptide N-acetylgalactosaminyltransferase 1 (GalNAc-T1) | Homo sapiens |
| 2589      | UDP-N-acetyl-alpha-D-galactosamine:polypeptide N-acetylgalactosaminyltransferase 13 (GalNAc-T13); UDP-N-acetyl-alpha-D-galactosamine:polypeptide N-acetylgalactosaminyltransferase 1 (GalNAc-T1) | Homo sapiens |
| 9212      | aurora kinase B                                                                                                                                                                                  | Homo sapiens |
| 9187      | solute carrier family 24 (sodium/potassium/calcium exchanger), member 1                                                                                                                          | Homo sapiens |
| 5356      | pleiotropic regulator 1 (PRL1 homolog, Arabidopsis)                                                                                                                                              | Homo sapiens |
| 100288939 | similar to hCG1987955                                                                                                                                                                            | Homo sapiens |
| 79894     | zinc finger protein 672; hypothetical LOC100130262                                                                                                                                               | Homo sapiens |
| 51260     | chromosome X open reading frame 26                                                                                                                                                               | Homo sapiens |
| 548596    | creatine kinase, mitochondrial 1A; creatine kinase, mitochondrial 1B                                                                                                                             | Homo sapiens |
| 1159      | creatine kinase, mitochondrial 1A; creatine kinase, mitochondrial 1B                                                                                                                             | Homo sapiens |
| 4691      | nucleolin                                                                                                                                                                                        | Homo sapiens |
| 50937     | Cdon homolog (mouse)                                                                                                                                                                             | Homo sapiens |
| 91316     | glucuronidase, beta/ immunoglobulin lambda-like polypeptide 1 pseudogene                                                                                                                         | Homo sapiens |
| 6299      | sal-like 1 (Drosophila)                                                                                                                                                                          | Homo sapiens |
| 26636     | olfactory receptor, family 7, subfamily E, member 37 pseudogene                                                                                                                                  | Homo sapiens |
| 7001      | peroxiredoxin 2                                                                                                                                                                                  | Homo sapiens |
| 3652      | intracisternal A particle-promoted polypeptide                                                                                                                                                   | Homo sapiens |
| 6919      | transcription elongation factor A (SII), 2                                                                                                                                                       | Homo sapiens |
| 129831    | RNA binding motif protein 45                                                                                                                                                                     | Homo sapiens |
| 56851     | chromosome 15 open reading frame 24                                                                                                                                                              | Homo sapiens |
| 23184     | mesoderm development candidate 2                                                                                                                                                                 | Homo sapiens |
| 65988     | zinc finger protein 747                                                                                                                                                                          | Homo sapiens |



|           |                                                                                                                                                                            |              |
|-----------|----------------------------------------------------------------------------------------------------------------------------------------------------------------------------|--------------|
| 29028     | ATPase family, AAA domain containing 2                                                                                                                                     | Homo sapiens |
| 637       | BH3 interacting domain death agonist                                                                                                                                       | Homo sapiens |
| 100287482 | similar to hCG2038584                                                                                                                                                      | Homo sapiens |
| 23204     | ADP-ribosylation factor-like 6 interacting protein 1                                                                                                                       | Homo sapiens |
| 26986     | poly(A) binding protein, cytoplasmic pseudogene 5; poly(A) binding protein, cytoplasmic 1                                                                                  | Homo sapiens |
| 11072     | dual specificity phosphatase 14                                                                                                                                            | Homo sapiens |
| 144717    | family with sequence similarity 109, member A                                                                                                                              | Homo sapiens |
| 51661     | FK506 binding protein 7                                                                                                                                                    | Homo sapiens |
| 23167     | EFR3 homolog A ( <i>S. cerevisiae</i> )                                                                                                                                    | Homo sapiens |
| 353274    | zinc finger protein 445                                                                                                                                                    | Homo sapiens |
| 55914     | erbB2 interacting protein                                                                                                                                                  | Homo sapiens |
| 4121      | mannosidase, alpha, class 1A, member 1                                                                                                                                     | Homo sapiens |
| 384       | arginase, type II                                                                                                                                                          | Homo sapiens |
| 23608     | makorin ring finger protein pseudogene 6; makorin ring finger protein 1                                                                                                    | Homo sapiens |
| 6760      | synovial sarcoma translocation, chromosome 18                                                                                                                              | Homo sapiens |
| 115416    | chromosome 7 open reading frame 30                                                                                                                                         | Homo sapiens |
| 5515      | protein phosphatase 2 (formerly 2A), catalytic subunit, alpha isoform                                                                                                      | Homo sapiens |
| 128       | alcohol dehydrogenase 5 (class III), chi polypeptide, pseudogene 4; alcohol dehydrogenase 5 (class III), chi polypeptide                                                   | Homo sapiens |
| 65977     | pleckstrin homology domain containing, family A (phosphoinositide binding specific) member 3                                                                               | Homo sapiens |
| 221687    | ring finger protein 182                                                                                                                                                    | Homo sapiens |
| 8655      | dynein, light chain, LC8-type 1                                                                                                                                            | Homo sapiens |
| 7205      | thyroid hormone receptor interactor 6                                                                                                                                      | Homo sapiens |
| 818       | calcium/calmodulin-dependent protein kinase II gamma                                                                                                                       | Homo sapiens |
| 23567     | zinc finger protein 346                                                                                                                                                    | Homo sapiens |
| 5685      | proteasome (prosome, macropain) subunit, alpha type, 4                                                                                                                     | Homo sapiens |
| 63915     | thioredoxin domain containing 5 (endoplasmic reticulum); muted homolog (mouse)                                                                                             | Homo sapiens |
| 81567     | thioredoxin domain containing 5 (endoplasmic reticulum); muted homolog (mouse)                                                                                             | Homo sapiens |
| 283489    | zinc finger protein 828                                                                                                                                                    | Homo sapiens |
| 25771     | TBC1 domain family, member 22A                                                                                                                                             | Homo sapiens |
| 23464     | glycine C-acetyltransferase (2-amino-3-ketobutyrate coenzyme A ligase)                                                                                                     | Homo sapiens |
| 80746     | tRNA splicing endonuclease 2 homolog ( <i>S. cerevisiae</i> )                                                                                                              | Homo sapiens |
| 55571     | chromosome 2 open reading frame 29                                                                                                                                         | Homo sapiens |
| 3035      | histidyl-tRNA synthetase                                                                                                                                                   | Homo sapiens |
| 51194     | importin 11                                                                                                                                                                | Homo sapiens |
| 25912     | chromosome 1 open reading frame 43                                                                                                                                         | Homo sapiens |
| 197320    | zinc finger protein 778                                                                                                                                                    | Homo sapiens |
| 7381      | similar to ubiquinol-cytochrome c reductase binding protein; ubiquinol-cytochrome c reductase binding protein pseudogene; ubiquinol-cytochrome c reductase binding protein | Homo sapiens |
| 9377      | cytochrome c oxidase subunit Va                                                                                                                                            | Homo sapiens |
| 81552     | similar to EGFR-coamplified and overexpressed protein; EGFR-coamplified and overexpressed protein                                                                          | Homo sapiens |
| 7982      | suppression of tumorigenicity 7                                                                                                                                            | Homo sapiens |
| 84939     | melanoma associated antigen (mutated) 1                                                                                                                                    | Homo sapiens |
| 1902      | lysophosphatidic acid receptor 1                                                                                                                                           | Homo sapiens |
| 552889    | hypothetical protein LOC552889                                                                                                                                             | Homo sapiens |
| 54921     | CTF8, chromosome transmission fidelity factor 8 homolog ( <i>S. cerevisiae</i> )                                                                                           | Homo sapiens |
| 5965      | RecQ protein-like (DNA helicase Q1-like)                                                                                                                                   | Homo sapiens |
| 139818    | dedicator of cytokinesis 11                                                                                                                                                | Homo sapiens |
| 1176      | adaptor-related protein complex 3, sigma 1 subunit                                                                                                                         | Homo sapiens |
| 54882     | ankyrin repeat and KH domain containing 1; ANKHD1-EIF4EBP3 readthrough transcript; eukaryotic translation initiation factor 4E binding protein 3                           | Homo sapiens |
| 404734    | ankyrin repeat and KH domain containing 1; ANKHD1-EIF4EBP3 readthrough transcript; eukaryotic translation initiation factor 4E binding protein 3                           | Homo sapiens |
| 84376     | hook homolog 3 ( <i>Drosophila</i> )                                                                                                                                       | Homo sapiens |
| 51529     | anaphase promoting complex subunit 11                                                                                                                                      | Homo sapiens |
| 4609      | v-myc myelocytomatosis viral oncogene homolog (avian)                                                                                                                      | Homo sapiens |
| 31        | acetyl-Coenzyme A carboxylase alpha                                                                                                                                        | Homo sapiens |
| 55176     | Sec61 alpha 2 subunit ( <i>S. cerevisiae</i> )                                                                                                                             | Homo sapiens |
| 115207    | potassium channel tetramerisation domain containing 12                                                                                                                     | Homo sapiens |
| 116987    | ArfGAP with GTPase domain, ankyrin repeat and PH domain 1                                                                                                                  | Homo sapiens |
| 10221     | tribbles homolog 1 ( <i>Drosophila</i> )                                                                                                                                   | Homo sapiens |
| 51015     | isochorismatase domain containing 1                                                                                                                                        | Homo sapiens |
| 51690     | LSM7 homolog, U6 small nuclear RNA associated ( <i>S. cerevisiae</i> )                                                                                                     | Homo sapiens |
| 124637    | cytochrome b5 domain containing 1                                                                                                                                          | Homo sapiens |
| 6392      | similar to succinate dehydrogenase complex, subunit D, integral membrane protein; succinate dehydrogenase complex, subunit D, integral membrane protein                    | Homo sapiens |
| 92106     | oxidoreductase NAD-binding domain containing 1                                                                                                                             | Homo sapiens |
| 79068     | fat mass and obesity associated                                                                                                                                            | Homo sapiens |
| 1612      | death-associated protein kinase 1                                                                                                                                          | Homo sapiens |
| 9830      | tripartite motif-containing 14                                                                                                                                             | Homo sapiens |
| 23197     | Fas associated factor family member 2                                                                                                                                      | Homo sapiens |
| 4512      | Cytochrome c oxidase subunit 1                                                                                                                                             | Homo sapiens |
| 80232     | WD repeat domain 26                                                                                                                                                        | Homo sapiens |
| 64081     | phenazine biosynthesis-like protein domain containing                                                                                                                      | Homo sapiens |

|           |                                                                                                                                      |              |
|-----------|--------------------------------------------------------------------------------------------------------------------------------------|--------------|
| 23636     | nucleoporin 62kDa                                                                                                                    | Homo sapiens |
| 6789      | serine/threonine kinase 4                                                                                                            | Homo sapiens |
| 154807    | vitamin K epoxide reductase complex, subunit 1-like 1                                                                                | Homo sapiens |
| 1892      | enoyl Coenzyme A hydratase, short chain, 1, mitochondrial                                                                            | Homo sapiens |
| 51096     | UTP18, small subunit (SSU) processome component, homolog (yeast)                                                                     | Homo sapiens |
| 9337      | CCR4-NOT transcription complex, subunit 8                                                                                            | Homo sapiens |
| 57706     | DENN/MADD domain containing 1A                                                                                                       | Homo sapiens |
| 2014      | epithelial membrane protein 3                                                                                                        | Homo sapiens |
| 56655     | polymerase (DNA-directed), epsilon 4 (p12 subunit)                                                                                   | Homo sapiens |
| 79959     | centrosomal protein 76kDa                                                                                                            | Homo sapiens |
| 9807      | inositol hexakisphosphate kinase 1                                                                                                   | Homo sapiens |
| 1315      | coatamer protein complex, subunit beta 1                                                                                             | Homo sapiens |
| 140739    | ubiquitin-conjugating enzyme E2F (putative)                                                                                          | Homo sapiens |
| 54468     | missing oocyte, meiosis regulator, homolog (Drosophila)                                                                              | Homo sapiens |
| 10577     | Niemann-Pick disease, type C2                                                                                                        | Homo sapiens |
| 55153     | SDAI domain containing 1                                                                                                             | Homo sapiens |
| 905       | cyclin T2                                                                                                                            | Homo sapiens |
| 2767      | guanine nucleotide binding protein (G protein), alpha 11 (Gq class)                                                                  | Homo sapiens |
| 84295     | PHD finger protein 6                                                                                                                 | Homo sapiens |
| 159090    | family with sequence similarity 122B                                                                                                 | Homo sapiens |
| 10736     | SIX homeobox 2                                                                                                                       | Homo sapiens |
| 51611     | DPH5 homolog (S. cerevisiae)                                                                                                         | Homo sapiens |
| 58526     | MIDI interacting protein 1 (gastrulation specific G12 homolog (zebrafish))                                                           | Homo sapiens |
| 5605      | mitogen-activated protein kinase kinase 2 pseudogene; mitogen-activated protein kinase kinase 2                                      | Homo sapiens |
| 2961      | general transcription factor IIE, polypeptide 2, beta 34kDa                                                                          | Homo sapiens |
| 6004      | regulator of G-protein signaling 16                                                                                                  | Homo sapiens |
| 55696     | RNA binding motif protein 22                                                                                                         | Homo sapiens |
| 4277      | MHC class I polypeptide-related sequence B                                                                                           | Homo sapiens |
| 100134445 | hypothetical LOC100134445                                                                                                            | Homo sapiens |
| 7718      | zinc finger protein 165                                                                                                              | Homo sapiens |
| 64753     | coiled-coil domain containing 136                                                                                                    | Homo sapiens |
| 131544    | beta-gamma crystallin domain containing 3                                                                                            | Homo sapiens |
| 400236    | hypothetical LOC400236                                                                                                               | Homo sapiens |
| 3613      | inositol (myo)-1(or 4)-monophosphatase 2                                                                                             | Homo sapiens |
| 402483    | hypothetical LOC402483; similar to capicua-like protein/double homeodomain 4 fusion protein                                          | Homo sapiens |
| 100129502 | hypothetical protein LOC100129502                                                                                                    | Homo sapiens |
| 196528    | AT rich interactive domain 2 (ARID, RFX-like)                                                                                        | Homo sapiens |
| 57120     | golgi associated PDZ and coiled-coil motif containing                                                                                | Homo sapiens |
| 2274      | four and a half LIM domains 2                                                                                                        | Homo sapiens |
| 25821     | mitochondrial translation optimization 1 homolog (S. cerevisiae)                                                                     | Homo sapiens |
| 3032      | hydroxyacyl-Coenzyme A dehydrogenase/3-ketoacyl-Coenzyme A thiolase/enoyl-Coenzyme A hydratase (trifunctional protein), beta subunit | Homo sapiens |
| 84310     | chromosome 7 open reading frame 50                                                                                                   | Homo sapiens |
| 2072      | excision repair cross-complementing rodent repair deficiency, complementation group 4                                                | Homo sapiens |
| 5205      | ATPase, class I, type 8B, member 1                                                                                                   | Homo sapiens |
| 123879    | DCN1, defective in cullin neddylation 1, domain containing 3 (S. cerevisiae)                                                         | Homo sapiens |
| 10007     | glucosamine-6-phosphate deaminase 1                                                                                                  | Homo sapiens |
| 10602     | CDC42 effector protein (Rho GTPase binding) 3                                                                                        | Homo sapiens |
| 221079    | ADP-ribosylation factor-like 5B                                                                                                      | Homo sapiens |
| 811       | calreticulin                                                                                                                         | Homo sapiens |
| 1054      | CCAAT/enhancer binding protein (C/EBP), gamma                                                                                        | Homo sapiens |
| 92305     | transmembrane protein 129                                                                                                            | Homo sapiens |
| 7257      | translin-associated factor X                                                                                                         | Homo sapiens |
| 1028      | cyclin-dependent kinase inhibitor 1C (p57, Kip2)                                                                                     | Homo sapiens |
| 79075     | defective in sister chromatid cohesion 1 homolog (S. cerevisiae)                                                                     | Homo sapiens |
| 283659    | protogenin homolog (Gallus gallus)                                                                                                   | Homo sapiens |
| 29115     | SAP30 binding protein                                                                                                                | Homo sapiens |
| 3875      | keratin 18; keratin 18 pseudogene 26; keratin 18 pseudogene 19                                                                       | Homo sapiens |
| 2969      | general transcription factor II, i; general transcription factor II, i, pseudogene                                                   | Homo sapiens |
| 100093631 | general transcription factor II, i; general transcription factor II, i, pseudogene                                                   | Homo sapiens |
| 103       | adenosine deaminase, RNA-specific                                                                                                    | Homo sapiens |
| 8508      | nipsnap homolog 1 (C. elegans)                                                                                                       | Homo sapiens |
| 3183      | heterogeneous nuclear ribonucleoprotein C (C1/C2)                                                                                    | Homo sapiens |
| 9317      | phosphotriesterase related                                                                                                           | Homo sapiens |
| 379025    | hypothetical LOC379025                                                                                                               | Homo sapiens |
| 57412     | arsenic (+3 oxidation state) methyltransferase                                                                                       | Homo sapiens |
| 23506     | KIAA0240                                                                                                                             | Homo sapiens |
| 83857     | transmembrane and tetratricopeptide repeat containing 1                                                                              | Homo sapiens |
| 6746      | signal sequence receptor, beta (translocon-associated protein beta)                                                                  | Homo sapiens |
| 10001     | mediator complex subunit 6                                                                                                           | Homo sapiens |
| 550643    | hypothetical LOC550643                                                                                                               | Homo sapiens |
| 119504    | chromosome 10 open reading frame 104                                                                                                 | Homo sapiens |
| 79918     | SET domain containing 6                                                                                                              | Homo sapiens |
| 387082    | SMT3 suppressor of mif two 3 homolog 4 (S. cerevisiae)                                                                               | Homo sapiens |
| 80823     | basic helix-loop-helix domain containing, class B, 9                                                                                 | Homo sapiens |

|        |                                                                                                      |              |
|--------|------------------------------------------------------------------------------------------------------|--------------|
| 8539   | API5-like 1; apoptosis inhibitor 5                                                                   | Homo sapiens |
| 1459   | casein kinase 2, alpha prime polypeptide                                                             | Homo sapiens |
| 1073   | cofilin 2 (muscle)                                                                                   | Homo sapiens |
| 6426   | splicing factor, arginine/serine-rich 1                                                              | Homo sapiens |
| 23677  | SH3-domain binding protein 4                                                                         | Homo sapiens |
| 65979  | phosphatase and actin regulator 4                                                                    | Homo sapiens |
| 51495  | protein tyrosine phosphatase-like A domain containing 1                                              | Homo sapiens |
| 56260  | chromosome 8 open reading frame 44                                                                   | Homo sapiens |
| 8635   | ribonuclease T2                                                                                      | Homo sapiens |
| 90861  | hematological and neurological expressed 1-like                                                      | Homo sapiens |
| 126003 | trafficking protein particle complex 5                                                               | Homo sapiens |
| 57819  | LSM2 homolog, U6 small nuclear RNA associated ( <i>S. cerevisiae</i> )                               | Homo sapiens |
| 55074  | oxidation resistance 1                                                                               | Homo sapiens |
| 55248  | transmembrane protein 206                                                                            | Homo sapiens |
| 6341   | SCO cytochrome oxidase deficient homolog 1 (yeast)                                                   | Homo sapiens |
| 5154   | platelet-derived growth factor alpha polypeptide                                                     | Homo sapiens |
| 10422  | UBA domain containing 1                                                                              | Homo sapiens |
| 91860  | calmodulin-like 4                                                                                    | Homo sapiens |
| 329    | baculoviral IAP repeat-containing 2                                                                  | Homo sapiens |
| 79871  | RNA polymerase II associated protein 2                                                               | Homo sapiens |
| 7150   | topoisomerase (DNA) I                                                                                | Homo sapiens |
| 5204   | prefoldin subunit 5                                                                                  | Homo sapiens |
| 7289   | tubby like protein 3                                                                                 | Homo sapiens |
| 55860  | actin-related protein 10 homolog ( <i>S. cerevisiae</i> )                                            | Homo sapiens |
| 10606  | phosphoribosylaminoimidazole carboxylase, phosphoribosylaminoimidazole succinocarboxamide synthetase | Homo sapiens |
| 23252  | OTU domain containing 3                                                                              | Homo sapiens |
| 545    | ataxia telangiectasia and Rad3 related; similar to ataxia telangiectasia and Rad3 related protein    | Homo sapiens |
| 6209   | ribosomal protein S15 pseudogene 5; ribosomal protein S15                                            | Homo sapiens |
| 55719  | family with sequence similarity 178, member A                                                        | Homo sapiens |
| 9666   | DAZ interacting protein 3, zinc finger                                                               | Homo sapiens |
| 22848  | AP2 associated kinase 1                                                                              | Homo sapiens |
| 728936 | neuroblastoma breakpoint family, member 16                                                           | Homo sapiens |
| 79637  | armadillo repeat containing 7                                                                        | Homo sapiens |
| 5627   | protein S (alpha)                                                                                    | Homo sapiens |
| 54951  | COMM domain containing 8                                                                             | Homo sapiens |
| 9232   | pituitary tumor-transforming 1; pituitary tumor-transforming 2                                       | Homo sapiens |
| 64718  | unkempt homolog ( <i>Drosophila</i> )-like                                                           | Homo sapiens |
| 64145  | zinc finger, FYVE domain containing 20                                                               | Homo sapiens |
| 23214  | exportin 6                                                                                           | Homo sapiens |
| 140609 | NIMA (never in mitosis gene a)-related kinase 7                                                      | Homo sapiens |
| 115024 | 5'-nucleotidase, cytosolic III-like                                                                  | Homo sapiens |
| 9274   | B-cell CLL/lymphoma 7C                                                                               | Homo sapiens |
| 54602  | Nedd4 family interacting protein 2                                                                   | Homo sapiens |
| 79155  | TNFAIP3 interacting protein 2                                                                        | Homo sapiens |
| 27043  | proline, glutamate and leucine rich protein 1                                                        | Homo sapiens |
| 152503 | SH3 domain containing 19                                                                             | Homo sapiens |
| 4681   | neuroblastoma, suppression of tumorigenicity 1                                                       | Homo sapiens |
| 8664   | eukaryotic translation initiation factor 3, subunit D                                                | Homo sapiens |
| 255231 | mucolipin 2                                                                                          | Homo sapiens |
| 54888  | NOL1/NOP2/Sun domain family, member 2                                                                | Homo sapiens |
| 30834  | zinc ribbon domain containing 1                                                                      | Homo sapiens |
| 3182   | heterogeneous nuclear ribonucleoprotein A/B                                                          | Homo sapiens |
| 23576  | dimethylarginine dimethylaminohydrolase 1                                                            | Homo sapiens |
| 9950   | golgi autoantigen, golgin subfamily a, 5                                                             | Homo sapiens |
| 645676 | hypothetical LOC645676                                                                               | Homo sapiens |
| 23383  | KIAA0892                                                                                             | Homo sapiens |
| 57473  | zinc finger protein 512B                                                                             | Homo sapiens |
| 253650 | ankyrin repeat domain 18A                                                                            | Homo sapiens |
| 375056 | melanoma inhibitory activity family, member 3                                                        | Homo sapiens |
| 7329   | ubiquitin-conjugating enzyme E2I (UBC9 homolog, yeast)                                               | Homo sapiens |
| 3204   | homeobox A7                                                                                          | Homo sapiens |
| 139341 | FUN14 domain containing 1                                                                            | Homo sapiens |
| 57787  | MAP/microtubule affinity-regulating kinase 4                                                         | Homo sapiens |
| 126792 | UDP-Gal:betaGal beta 1,3-galactosyltransferase polypeptide 6                                         | Homo sapiens |
| 2186   | bromodomain PHD finger transcription factor                                                          | Homo sapiens |
| 92689  | family with sequence similarity 114, member A1                                                       | Homo sapiens |
| 10576  | chaperonin containing TCP1, subunit 2 (beta)                                                         | Homo sapiens |
| 54861  | SNF related kinase                                                                                   | Homo sapiens |
| 84440  | RAB11 family interacting protein 4 (class II)                                                        | Homo sapiens |
| 23410  | sirtuin (silent mating type information regulation 2 homolog) 3 ( <i>S. cerevisiae</i> )             | Homo sapiens |
| 55204  | golgi phosphoprotein 3-like                                                                          | Homo sapiens |
| 54890  | alkB, alkylation repair homolog 5 ( <i>E. coli</i> )                                                 | Homo sapiens |
| 5479   | peptidylprolyl isomerase B (cyclophilin B)                                                           | Homo sapiens |
| 29970  | schwannomin interacting protein 1                                                                    | Homo sapiens |

|           |                                                                                                                                                                                                                                                                                                                                               |              |
|-----------|-----------------------------------------------------------------------------------------------------------------------------------------------------------------------------------------------------------------------------------------------------------------------------------------------------------------------------------------------|--------------|
| 60481     | ELOVL family member 5, elongation of long chain fatty acids (FEN1/Elo2, SUR4/Elo3-like, yeast)                                                                                                                                                                                                                                                | Homo sapiens |
| 80817     | KIAA1712                                                                                                                                                                                                                                                                                                                                      | Homo sapiens |
| 65084     | transmembrane protein 135                                                                                                                                                                                                                                                                                                                     | Homo sapiens |
| 55901     | thrombospondin, type I, domain containing 1                                                                                                                                                                                                                                                                                                   | Homo sapiens |
| 112770    | chromosome 1 open reading frame 85                                                                                                                                                                                                                                                                                                            | Homo sapiens |
| 64147     | kinesin family member 9                                                                                                                                                                                                                                                                                                                       | Homo sapiens |
| 90333     | zinc finger protein 468                                                                                                                                                                                                                                                                                                                       | Homo sapiens |
| 54617     | INO80 homolog (S. cerevisiae)                                                                                                                                                                                                                                                                                                                 | Homo sapiens |
| 9014      | TATA box binding protein (TBP)-associated factor, RNA polymerase I, B, 63kDa                                                                                                                                                                                                                                                                  | Homo sapiens |
| 54566     | erythrocyte membrane protein band 4.1 like 4B                                                                                                                                                                                                                                                                                                 | Homo sapiens |
| 64398     | membrane protein, palmitoylated 5 (MAGUK p55 subfamily member 5)                                                                                                                                                                                                                                                                              | Homo sapiens |
| 80007     | chromosome 10 open reading frame 88                                                                                                                                                                                                                                                                                                           | Homo sapiens |
| 997       | cell division cycle 34 homolog (S. cerevisiae)                                                                                                                                                                                                                                                                                                | Homo sapiens |
| 81669     | cyclin L2; chemokine (C-C motif) receptor 6                                                                                                                                                                                                                                                                                                   | Homo sapiens |
| 4048      | leukotriene A4 hydrolase                                                                                                                                                                                                                                                                                                                      | Homo sapiens |
| 8992      | ATPase, H <sup>+</sup> transporting, lysosomal 9kDa, V0 subunit e1                                                                                                                                                                                                                                                                            | Homo sapiens |
| 55014     | syntaxin 17                                                                                                                                                                                                                                                                                                                                   | Homo sapiens |
| 9601      | protein disulfide isomerase family A, member 4                                                                                                                                                                                                                                                                                                | Homo sapiens |
| 55657     | zinc finger protein 692                                                                                                                                                                                                                                                                                                                       | Homo sapiens |
| 28512     | NFKB inhibitor interacting Ras-like 1                                                                                                                                                                                                                                                                                                         | Homo sapiens |
| 51123     | zinc finger protein 706                                                                                                                                                                                                                                                                                                                       | Homo sapiens |
| 6880      | TAF9 RNA polymerase II, TATA box binding protein (TBP)-associated factor, 32kDa                                                                                                                                                                                                                                                               | Homo sapiens |
| 6431      | splicing factor, arginine/serine-rich 6; similar to arginine/serine-rich splicing factor 6                                                                                                                                                                                                                                                    | Homo sapiens |
| 83480     | pseudouridylate synthase 3                                                                                                                                                                                                                                                                                                                    | Homo sapiens |
| 23474     | ethylmalonic encephalopathy 1                                                                                                                                                                                                                                                                                                                 | Homo sapiens |
| 150684    | copper metabolism (Murr1) domain containing 1                                                                                                                                                                                                                                                                                                 | Homo sapiens |
| 23774     | bromodomain containing 1                                                                                                                                                                                                                                                                                                                      | Homo sapiens |
| 10767     | HBS1-like (S. cerevisiae)                                                                                                                                                                                                                                                                                                                     | Homo sapiens |
| 4595      | mutY homolog (E. coli)                                                                                                                                                                                                                                                                                                                        | Homo sapiens |
| 4801      | nuclear transcription factor Y, beta                                                                                                                                                                                                                                                                                                          | Homo sapiens |
| 324       | adenomatous polyposis coli                                                                                                                                                                                                                                                                                                                    | Homo sapiens |
| 112936    | vacuolar protein sorting 26 homolog B (S. pombe)                                                                                                                                                                                                                                                                                              | Homo sapiens |
| 832       | capping protein (actin filament) muscle Z-line, beta                                                                                                                                                                                                                                                                                          | Homo sapiens |
| 55585     | ubiquitin-conjugating enzyme E2Q family member 1                                                                                                                                                                                                                                                                                              | Homo sapiens |
| 56672     | chromosome 11 open reading frame 17                                                                                                                                                                                                                                                                                                           | Homo sapiens |
| 728498    | similar to Golgin subfamily A member 8-like protein 2; Golgin subfamily A member 8-like protein 1; Golgin subfamily A member 8-like protein 3; golgi autoantigen, golgin subfamily a, 9 pseudogene; similar to golgi autoantigen, golgin subfamily a, 8E                                                                                      | Homo sapiens |
| 401022    | hypothetical LOC401022                                                                                                                                                                                                                                                                                                                        | Homo sapiens |
| 55285     | RNA binding motif protein 41                                                                                                                                                                                                                                                                                                                  | Homo sapiens |
| 1455      | casein kinase 1, gamma 2                                                                                                                                                                                                                                                                                                                      | Homo sapiens |
| 9255      | aminoacyl tRNA synthetase complex-interacting multifunctional protein 1                                                                                                                                                                                                                                                                       | Homo sapiens |
| 8611      | phosphatidic acid phosphatase type 2A                                                                                                                                                                                                                                                                                                         | Homo sapiens |
| 23499     | microtubule-actin crosslinking factor 1                                                                                                                                                                                                                                                                                                       | Homo sapiens |
| 3909      | laminin, alpha 3                                                                                                                                                                                                                                                                                                                              | Homo sapiens |
| 400506    | chromosome 16 open reading frame 88                                                                                                                                                                                                                                                                                                           | Homo sapiens |
| 7351      | uncoupling protein 2 (mitochondrial, proton carrier)                                                                                                                                                                                                                                                                                          | Homo sapiens |
| 50618     | intersectin 2                                                                                                                                                                                                                                                                                                                                 | Homo sapiens |
| 56987     | bobby sox homolog (Drosophila)                                                                                                                                                                                                                                                                                                                | Homo sapiens |
| 80821     | DDHD domain containing 1                                                                                                                                                                                                                                                                                                                      | Homo sapiens |
| 10000     | v-akt murine thymoma viral oncogene homolog 3 (protein kinase B, gamma)                                                                                                                                                                                                                                                                       | Homo sapiens |
| 8936      | WAS protein family, member 1                                                                                                                                                                                                                                                                                                                  | Homo sapiens |
| 84266     | alkB, alkylation repair homolog 7 (E. coli)                                                                                                                                                                                                                                                                                                   | Homo sapiens |
| 54849     | differentially expressed in FDCP 8 homolog (mouse)                                                                                                                                                                                                                                                                                            | Homo sapiens |
| 55825     | peroxisomal trans-2-enoyl-CoA reductase                                                                                                                                                                                                                                                                                                       | Homo sapiens |
| 6566      | solute carrier family 16, member 1 (monocarboxylic acid transporter 1)                                                                                                                                                                                                                                                                        | Homo sapiens |
| 121642    | alkB, alkylation repair homolog 2 (E. coli)                                                                                                                                                                                                                                                                                                   | Homo sapiens |
| 84196     | ubiquitin specific peptidase 48                                                                                                                                                                                                                                                                                                               | Homo sapiens |
| 1031      | cyclin-dependent kinase inhibitor 2C (p18, inhibits CDK4)                                                                                                                                                                                                                                                                                     | Homo sapiens |
| 9659      | hypothetical protein LOC100134230; similar to KIAA0454 protein; similar to phosphodiesterase 4D interacting protein isoform 2; phosphodiesterase 4D interacting protein                                                                                                                                                                       | Homo sapiens |
| 123207    | chromosome 15 open reading frame 40                                                                                                                                                                                                                                                                                                           | Homo sapiens |
| 100132884 | hypothetical protein LOC100132884                                                                                                                                                                                                                                                                                                             | Homo sapiens |
| 8364      | histone cluster 1, H4l; histone cluster 1, H4k; histone cluster 4, H4; histone cluster 1, H4h; histone cluster 1, H4j; histone cluster 1, H4i; histone cluster 1, H4d; histone cluster 1, H4c; histone cluster 1, H4f; histone cluster 1, H4e; histone cluster 1, H4b; histone cluster 1, H4a; histone cluster 2, H4a; histone cluster 2, H4b | Homo sapiens |
| 10066     | secretory carrier membrane protein 2                                                                                                                                                                                                                                                                                                          | Homo sapiens |
| 10228     | syntaxin 6                                                                                                                                                                                                                                                                                                                                    | Homo sapiens |
| 6635      | small nuclear ribonucleoprotein polypeptide E-like 1; small nuclear ribonucleoprotein polypeptide E; similar to hCG23490                                                                                                                                                                                                                      | Homo sapiens |
| 139285    | family with sequence similarity 123B                                                                                                                                                                                                                                                                                                          | Homo sapiens |
| 283687    | chromosome 15 open reading frame 37                                                                                                                                                                                                                                                                                                           | Homo sapiens |
| 3572      | interleukin 6 signal transducer (gp130, oncostatin M receptor)                                                                                                                                                                                                                                                                                | Homo sapiens |

|           |                                                                                                                                                                                                                                                                                                                            |              |
|-----------|----------------------------------------------------------------------------------------------------------------------------------------------------------------------------------------------------------------------------------------------------------------------------------------------------------------------------|--------------|
| 26122     | enhancer of polycomb homolog 2 ( <i>Drosophila</i> )                                                                                                                                                                                                                                                                       | Homo sapiens |
| 317671    | Rieske (Fe-S) domain containing                                                                                                                                                                                                                                                                                            | Homo sapiens |
| 152559    | progesterone and adiponectin receptor family member III                                                                                                                                                                                                                                                                    | Homo sapiens |
| 55113     | XK, Kell blood group complex subunit-related family, member 8                                                                                                                                                                                                                                                              | Homo sapiens |
| 56907     | spire homolog 1 ( <i>Drosophila</i> )                                                                                                                                                                                                                                                                                      | Homo sapiens |
| 5423      | polymerase (DNA directed), beta                                                                                                                                                                                                                                                                                            | Homo sapiens |
| 261729    | six transmembrane epithelial antigen of the prostate 2                                                                                                                                                                                                                                                                     | Homo sapiens |
| 10982     | microtubule-associated protein, RP/EB family, member 2                                                                                                                                                                                                                                                                     | Homo sapiens |
| 55768     | N-glycanase 1                                                                                                                                                                                                                                                                                                              | Homo sapiens |
| 84937     | zinc and ring finger 1                                                                                                                                                                                                                                                                                                     | Homo sapiens |
| 4723      | NADH dehydrogenase (ubiquinone) flavoprotein 1, 51kDa                                                                                                                                                                                                                                                                      | Homo sapiens |
| 5080      | paired box 6                                                                                                                                                                                                                                                                                                               | Homo sapiens |
| 8880      | far upstream element (FUSE) binding protein 1                                                                                                                                                                                                                                                                              | Homo sapiens |
| 22926     | activating transcription factor 6                                                                                                                                                                                                                                                                                          | Homo sapiens |
| 5236      | phosphoglucomutase 1                                                                                                                                                                                                                                                                                                       | Homo sapiens |
| 27346     | transmembrane protein 97                                                                                                                                                                                                                                                                                                   | Homo sapiens |
| 10166     | solute carrier family 25 (mitochondrial carrier; ornithine transporter) member 15                                                                                                                                                                                                                                          | Homo sapiens |
| 9656      | mediator of DNA-damage checkpoint 1                                                                                                                                                                                                                                                                                        | Homo sapiens |
| 8233      | zinc finger (CCCH type), RNA-binding motif and serine/arginine rich 2                                                                                                                                                                                                                                                      | Homo sapiens |
| 5694      | proteasome (prosome, macropain) subunit, beta type, 6                                                                                                                                                                                                                                                                      | Homo sapiens |
| 3030      | hydroxyacyl-Coenzyme A dehydrogenase/3-ketoacyl-Coenzyme A thiolase/enoyl-Coenzyme A hydratase (trifunctional protein), alpha subunit                                                                                                                                                                                      | Homo sapiens |
| 1112      | forkhead box N3                                                                                                                                                                                                                                                                                                            | Homo sapiens |
| 23028     | lysine (K)-specific demethylase 1                                                                                                                                                                                                                                                                                          | Homo sapiens |
| 79002     | chromosome 19 open reading frame 43                                                                                                                                                                                                                                                                                        | Homo sapiens |
| 84987     | chromosome 12 open reading frame 62                                                                                                                                                                                                                                                                                        | Homo sapiens |
| 100286793 | hypothetical LOC100286793                                                                                                                                                                                                                                                                                                  | Homo sapiens |
| 2005      | ELK4, ETS-domain protein (SRF accessory protein 1)                                                                                                                                                                                                                                                                         | Homo sapiens |
| 28992     | MACRO domain containing 1                                                                                                                                                                                                                                                                                                  | Homo sapiens |
| 283820    | NODAL modulator 3; NODAL modulator 1; NODAL modulator 2                                                                                                                                                                                                                                                                    | Homo sapiens |
| 23420     | NODAL modulator 3; NODAL modulator 1; NODAL modulator 2                                                                                                                                                                                                                                                                    | Homo sapiens |
| 408050    | NODAL modulator 3; NODAL modulator 1; NODAL modulator 2                                                                                                                                                                                                                                                                    | Homo sapiens |
| 10189     | THO complex 4                                                                                                                                                                                                                                                                                                              | Homo sapiens |
| 55559     | three prime repair exonuclease 2; HAUS augmin-like complex, subunit 7                                                                                                                                                                                                                                                      | Homo sapiens |
| 11219     | three prime repair exonuclease 2; HAUS augmin-like complex, subunit 7                                                                                                                                                                                                                                                      | Homo sapiens |
| 6232      | ribosomal protein S27 pseudogene 29; ribosomal protein S27 pseudogene 9; ribosomal protein S27 pseudogene 23; ribosomal protein S27 pseudogene 13; ribosomal protein S27; ribosomal protein S27 pseudogene 21; ribosomal protein S27 pseudogene 7; ribosomal protein S27 pseudogene 6; ribosomal protein S27 pseudogene 19 | Homo sapiens |
| 29945     | anaphase promoting complex subunit 4                                                                                                                                                                                                                                                                                       | Homo sapiens |
| 55662     | hypoxia inducible factor 1, alpha subunit inhibitor                                                                                                                                                                                                                                                                        | Homo sapiens |
| 11102     | ribonuclease P/MRP 14kDa subunit                                                                                                                                                                                                                                                                                           | Homo sapiens |
| 51209     | RAB9B, member RAS oncogene family                                                                                                                                                                                                                                                                                          | Homo sapiens |
| 644096    | succinate dehydrogenase complex assembly factor 1                                                                                                                                                                                                                                                                          | Homo sapiens |
| 7325      | ubiquitin-conjugating enzyme E2E 2 (UBC4/5 homolog, yeast)                                                                                                                                                                                                                                                                 | Homo sapiens |
| 85463     | zinc finger CCCH-type containing 12C                                                                                                                                                                                                                                                                                       | Homo sapiens |
| 9870      | KIAA0317                                                                                                                                                                                                                                                                                                                   | Homo sapiens |
| 28985     | malignant T cell amplified sequence 1                                                                                                                                                                                                                                                                                      | Homo sapiens |
| 10531     | pitrilysin metalloproteinase 1                                                                                                                                                                                                                                                                                             | Homo sapiens |
| 8443      | glyceronephosphate O-acyltransferase                                                                                                                                                                                                                                                                                       | Homo sapiens |
| 10147     | splicing factor, arginine/serine-rich 14                                                                                                                                                                                                                                                                                   | Homo sapiens |
| 54801     | HAUS augmin-like complex, subunit 6                                                                                                                                                                                                                                                                                        | Homo sapiens |
| 1398      | v-crk sarcoma virus CT10 oncogene homolog (avian)                                                                                                                                                                                                                                                                          | Homo sapiens |
| 7849      | paired box 8                                                                                                                                                                                                                                                                                                               | Homo sapiens |
| 506       | ATP synthase, H <sup>+</sup> transporting, mitochondrial F1 complex, beta polypeptide                                                                                                                                                                                                                                      | Homo sapiens |
| 4860      | nucleoside phosphorylase                                                                                                                                                                                                                                                                                                   | Homo sapiens |
| 27163     | N-acylglutamine acid amidase                                                                                                                                                                                                                                                                                               | Homo sapiens |
| 9409      | peroxisomal biogenesis factor 16                                                                                                                                                                                                                                                                                           | Homo sapiens |
| 54887     | UHRF1 binding protein 1                                                                                                                                                                                                                                                                                                    | Homo sapiens |
| 53838     | chromosome 11 open reading frame 24                                                                                                                                                                                                                                                                                        | Homo sapiens |
| 114876    | oxysterol binding protein-like 1A                                                                                                                                                                                                                                                                                          | Homo sapiens |
| 80728     | KIAA1688 protein                                                                                                                                                                                                                                                                                                           | Homo sapiens |
| 60560     | MAK10 homolog, amino-acid N-acetyltransferase subunit ( <i>S. cerevisiae</i> )                                                                                                                                                                                                                                             | Homo sapiens |
| 7378      | uridine phosphorylase 1                                                                                                                                                                                                                                                                                                    | Homo sapiens |
| 994       | cell division cycle 25 homolog B ( <i>S. pombe</i> )                                                                                                                                                                                                                                                                       | Homo sapiens |
| 1652      | D-dopachrome tautomerase                                                                                                                                                                                                                                                                                                   | Homo sapiens |
| 29095     | ORM1-like 2 ( <i>S. cerevisiae</i> )                                                                                                                                                                                                                                                                                       | Homo sapiens |
| 2799      | glucosamine (N-acetyl)-6-sulfatase                                                                                                                                                                                                                                                                                         | Homo sapiens |
| 79956     | endoplasmic reticulum metalloproteinase 1                                                                                                                                                                                                                                                                                  | Homo sapiens |
| 27238     | G patch domain and KOW motifs                                                                                                                                                                                                                                                                                              | Homo sapiens |
| 55855     | family with sequence similarity 45, member B                                                                                                                                                                                                                                                                               | Homo sapiens |
| 64863     | methyltransferase like 4                                                                                                                                                                                                                                                                                                   | Homo sapiens |
| 65996     | hypothetical LOC65996                                                                                                                                                                                                                                                                                                      | Homo sapiens |
| 57496     | MKL/myocardin-like 2                                                                                                                                                                                                                                                                                                       | Homo sapiens |
| 147179    | WAS/WASL interacting protein family, member 2                                                                                                                                                                                                                                                                              | Homo sapiens |
| 84289     | inhibitor of growth family, member 5                                                                                                                                                                                                                                                                                       | Homo sapiens |
| 889       | KRIT1, ankyrin repeat containing                                                                                                                                                                                                                                                                                           | Homo sapiens |

|        |                                                                                                                                                                                           |              |
|--------|-------------------------------------------------------------------------------------------------------------------------------------------------------------------------------------------|--------------|
| 154215 | Na <sup>+</sup> /K <sup>+</sup> transporting ATPase interacting 2                                                                                                                         | Homo sapiens |
| 79979  | TRM2 tRNA methyltransferase 2 homolog B ( <i>S. cerevisiae</i> )                                                                                                                          | Homo sapiens |
| 11183  | mitogen-activated protein kinase kinase kinase kinase 5                                                                                                                                   | Homo sapiens |
| 168455 | hypothetical protein FLJ36031                                                                                                                                                             | Homo sapiens |
| 4076   | cell cycle associated protein 1                                                                                                                                                           | Homo sapiens |
| 163486 | DENN/MADD domain containing 1B                                                                                                                                                            | Homo sapiens |
| 9482   | syntaxin 8                                                                                                                                                                                | Homo sapiens |
| 5936   | RNA binding motif protein 14; RNA binding motif protein 4                                                                                                                                 | Homo sapiens |
| 10432  | RNA binding motif protein 14; RNA binding motif protein 4                                                                                                                                 | Homo sapiens |
| 3482   | insulin-like growth factor 2 receptor                                                                                                                                                     | Homo sapiens |
| 60592  | short coiled-coil protein                                                                                                                                                                 | Homo sapiens |
| 317    | apoptotic peptidase activating factor 1                                                                                                                                                   | Homo sapiens |
| 27335  | eukaryotic translation initiation factor 3, subunit K                                                                                                                                     | Homo sapiens |
| 79833  | gem (nuclear organelle) associated protein 6                                                                                                                                              | Homo sapiens |
| 55180  | lines homolog 1 ( <i>Drosophila</i> )                                                                                                                                                     | Homo sapiens |
| 27430  | methionine adenosyltransferase II, beta                                                                                                                                                   | Homo sapiens |
| 23193  | glucosidase, alpha; neutral AB                                                                                                                                                            | Homo sapiens |
| 9203   | zinc finger, MYM-type 3                                                                                                                                                                   | Homo sapiens |
| 10011  | steroid receptor RNA activator 1                                                                                                                                                          | Homo sapiens |
| 374354 | NHL repeat containing 2                                                                                                                                                                   | Homo sapiens |
| 647979 | hypothetical LOC647979                                                                                                                                                                    | Homo sapiens |
| 7541   | zinc finger protein 161 homolog (mouse)                                                                                                                                                   | Homo sapiens |
| 10498  | coactivator-associated arginine methyltransferase 1                                                                                                                                       | Homo sapiens |
| 54764  | zinc finger, RAN-binding domain containing 1                                                                                                                                              | Homo sapiens |
| 286827 | tripartite motif-containing 59                                                                                                                                                            | Homo sapiens |
| 23157  | septin 6                                                                                                                                                                                  | Homo sapiens |
| 389421 | lin-28 homolog B ( <i>C. elegans</i> )                                                                                                                                                    | Homo sapiens |
| 9577   | brain and reproductive organ-expressed (TNFRSF1A modulator)                                                                                                                               | Homo sapiens |
| 728568 | chromosome 12 open reading frame 73                                                                                                                                                       | Homo sapiens |
| 54793  | similar to Potassium channel tetramerisation domain containing 9; potassium channel tetramerisation domain containing 9; similar to potassium channel tetramerisation domain containing 9 | Homo sapiens |
| 9862   | mediator complex subunit 24                                                                                                                                                               | Homo sapiens |
| 463    | zinc finger homeobox 3; hypothetical LOC100132068                                                                                                                                         | Homo sapiens |
| 51109  | retinol dehydrogenase 11 (all-trans/9-cis/11-cis)                                                                                                                                         | Homo sapiens |
| 55352  | chromosome 17 open reading frame 79                                                                                                                                                       | Homo sapiens |
| 3265   | v-Ha-ras Harvey rat sarcoma viral oncogene homolog                                                                                                                                        | Homo sapiens |
| 19     | ATP-binding cassette, sub-family A (ABC1), member 1                                                                                                                                       | Homo sapiens |
| 390    | Rho family GTPase 3                                                                                                                                                                       | Homo sapiens |
| 5295   | phosphoinositide-3-kinase, regulatory subunit 1 (alpha)                                                                                                                                   | Homo sapiens |
| 54877  | zinc finger, CCHC domain containing 2                                                                                                                                                     | Homo sapiens |
| 9550   | ATPase, H <sup>+</sup> transporting, lysosomal 13kDa, V1 subunit G1                                                                                                                       | Homo sapiens |
| 770    | carbonic anhydrase XI                                                                                                                                                                     | Homo sapiens |
| 221120 | alkB, alkylation repair homolog 3 ( <i>E. coli</i> )                                                                                                                                      | Homo sapiens |
| 2669   | GTP binding protein overexpressed in skeletal muscle                                                                                                                                      | Homo sapiens |
| 54934  | chromosome 12 open reading frame 41                                                                                                                                                       | Homo sapiens |
| 23     | ATP-binding cassette, sub-family F (GCN20), member 1                                                                                                                                      | Homo sapiens |
| 137682 | chromosome 8 open reading frame 38                                                                                                                                                        | Homo sapiens |
| 27252  | kelch-like 20 ( <i>Drosophila</i> )                                                                                                                                                       | Homo sapiens |
| 10163  | WAS protein family, member 2                                                                                                                                                              | Homo sapiens |
| 8907   | adaptor-related protein complex 1, mu 1 subunit                                                                                                                                           | Homo sapiens |
| 5806   | pentraxin-related gene, rapidly induced by IL-1 beta                                                                                                                                      | Homo sapiens |
| 145508 | chromosome 14 open reading frame 145                                                                                                                                                      | Homo sapiens |
| 79009  | DEAD (Asp-Glu-Ala-Asp) box polypeptide 50                                                                                                                                                 | Homo sapiens |
| 553115 | penta-EF-hand domain containing 1                                                                                                                                                         | Homo sapiens |
| 2009   | echinoderm microtubule associated protein like 1                                                                                                                                          | Homo sapiens |
| 112479 | exoribonuclease 2                                                                                                                                                                         | Homo sapiens |
| 3688   | integrin, beta 1 (fibronectin receptor, beta polypeptide, antigen CD29 includes MDF2, MSK12)                                                                                              | Homo sapiens |
| 399474 | transmembrane protein 200B                                                                                                                                                                | Homo sapiens |
| 2132   | exostoses (multiple) 2                                                                                                                                                                    | Homo sapiens |
| 10130  | protein disulfide isomerase family A, member 6                                                                                                                                            | Homo sapiens |
| 4125   | mannosidase, alpha, class 2B, member 1                                                                                                                                                    | Homo sapiens |
| 1173   | adaptor-related protein complex 2, mu 1 subunit                                                                                                                                           | Homo sapiens |
| 55743  | checkpoint with forkhead and ring finger domains                                                                                                                                          | Homo sapiens |
| 1456   | casein kinase 1, gamma 3                                                                                                                                                                  | Homo sapiens |
| 6158   | ribosomal protein L28                                                                                                                                                                     | Homo sapiens |
| 4134   | microtubule-associated protein 4                                                                                                                                                          | Homo sapiens |
| 51361  | hook homolog 1 ( <i>Drosophila</i> )                                                                                                                                                      | Homo sapiens |
| 150275 | coiled-coil domain containing 117                                                                                                                                                         | Homo sapiens |
| 10818  | fibroblast growth factor receptor substrate 2                                                                                                                                             | Homo sapiens |
| 138639 | protein tyrosine phosphatase domain containing 1                                                                                                                                          | Homo sapiens |
| 163590 | torsin A interacting protein 2                                                                                                                                                            | Homo sapiens |
| 6815   | serine/threonine/tyrosine interacting protein                                                                                                                                             | Homo sapiens |
| 84707  | brain expressed X-linked 2                                                                                                                                                                | Homo sapiens |
| 10495  | ecto-NOX disulfide-thiol exchanger 2                                                                                                                                                      | Homo sapiens |
| 10929  | splicing factor, arginine/serine-rich 2B                                                                                                                                                  | Homo sapiens |

|           |                                                                                                        |              |
|-----------|--------------------------------------------------------------------------------------------------------|--------------|
| 4350      | N-methylpurine-DNA glycosylase                                                                         | Homo sapiens |
| 116143    | WD repeat domain 92                                                                                    | Homo sapiens |
| 10499     | nuclear receptor coactivator 2                                                                         | Homo sapiens |
| 84668     | family with sequence similarity 126, member A                                                          | Homo sapiens |
| 54958     | transmembrane protein 160                                                                              | Homo sapiens |
| 91966     | chromosome X open reading frame 40A; chromosome X open reading frame 40B                               | Homo sapiens |
| 541578    | chromosome X open reading frame 40A; chromosome X open reading frame 40B                               | Homo sapiens |
| 8140      | solute carrier family 7 (cationic amino acid transporter, y+ system), member 5                         | Homo sapiens |
| 144455    | E2F transcription factor 7                                                                             | Homo sapiens |
| 10788     | IQ motif containing GTPase activating protein 2                                                        | Homo sapiens |
| 25937     | WW domain containing transcription regulator 1                                                         | Homo sapiens |
| 10169     | chromosome 15 open reading frame 63; small EDRK-rich factor 2                                          | Homo sapiens |
| 25764     | chromosome 15 open reading frame 63; small EDRK-rich factor 2                                          | Homo sapiens |
| 6584      | solute carrier family 22 (organic cation/carnitine transporter), member 5                              | Homo sapiens |
| 134553    | chromosome 5 open reading frame 24                                                                     | Homo sapiens |
| 57683     | zinc finger, DBF-type containing 2                                                                     | Homo sapiens |
| 84324     | SAP domain containing ribonucleoprotein                                                                | Homo sapiens |
| 9421      | heart and neural crest derivatives expressed 1                                                         | Homo sapiens |
| 57148     | KIAA1219                                                                                               | Homo sapiens |
| 81554     | RCC1-like G exchanging factor-like; Williams-Beuren syndrome chromosome region 16                      | Homo sapiens |
| 23635     | single-stranded DNA binding protein 2                                                                  | Homo sapiens |
| 23213     | sulfatase 1                                                                                            | Homo sapiens |
| 2874      | G protein pathway suppressor 2                                                                         | Homo sapiens |
| 54981     | chromosome 9 open reading frame 95                                                                     | Homo sapiens |
| 26472     | protein phosphatase 1, regulatory (inhibitor) subunit 14B                                              | Homo sapiens |
| 55907     | cytidine monophosphate N-acetylneuraminic acid synthetase                                              | Homo sapiens |
| 23255     | KIAA0802                                                                                               | Homo sapiens |
| 2079      | enhancer of rudimentary homolog (Drosophila)                                                           | Homo sapiens |
| 439       | arsA arsenite transporter, ATP-binding, homolog 1 (bacterial)                                          | Homo sapiens |
| 9818      | nucleoporin like 1                                                                                     | Homo sapiens |
| 5635      | phosphoribosyl pyrophosphate synthetase-associated protein 1                                           | Homo sapiens |
| 4707      | NADH dehydrogenase (ubiquinone) 1 beta subcomplex, 1, 7kDa                                             | Homo sapiens |
| 81544     | glycerophosphodiester phosphodiesterase domain containing 5                                            | Homo sapiens |
| 1432      | mitogen-activated protein kinase 14                                                                    | Homo sapiens |
| 390916    | nudix (nucleoside diphosphate linked moiety X)-type motif 19                                           | Homo sapiens |
| 950       | scavenger receptor class B, member 2                                                                   | Homo sapiens |
| 7270      | transcription termination factor, RNA polymerase I                                                     | Homo sapiens |
| 55954     | zinc finger, matrin type 5                                                                             | Homo sapiens |
| 81889     | fumarylacetoacetate hydrolase domain containing 1                                                      | Homo sapiens |
| 79888     | lysophosphatidylcholine acyltransferase 1                                                              | Homo sapiens |
| 868       | Cas-Br-M (murine) ecotropic retroviral transforming sequence b                                         | Homo sapiens |
| 57142     | reticulon 4                                                                                            | Homo sapiens |
| 64792     | RAB, member RAS oncogene family-like 5                                                                 | Homo sapiens |
| 728613    | programmed cell death 6 pseudogene                                                                     | Homo sapiens |
| 57176     | valyl-tRNA synthetase 2, mitochondrial (putative)                                                      | Homo sapiens |
| 29978     | ubiquilin 2                                                                                            | Homo sapiens |
| 26273     | F-box protein 3                                                                                        | Homo sapiens |
| 63933     | coiled-coil domain containing 90A                                                                      | Homo sapiens |
| 51108     | methyltransferase like 9                                                                               | Homo sapiens |
| 389856    | ubiquitin specific peptidase 27, X-linked                                                              | Homo sapiens |
| 51320     | mex-3 homolog C (C. elegans)                                                                           | Homo sapiens |
| 100130837 | hypothetical LOC100130837                                                                              | Homo sapiens |
| 51372     | coiled-coil domain containing 72; hypothetical LOC729973; hypothetical LOC728416                       | Homo sapiens |
| 58513     | epidermal growth factor receptor pathway substrate 15-like 1                                           | Homo sapiens |
| 220074    | leucine rich transmembrane and O-methyltransferase domain containing                                   | Homo sapiens |
| 346689    | killer cell lectin-like receptor subfamily G, member 2                                                 | Homo sapiens |
| 55027     | HEAT repeat containing 3                                                                               | Homo sapiens |
| 9522      | secretory carrier membrane protein 1                                                                   | Homo sapiens |
| 84798     | chromosome 19 open reading frame 48                                                                    | Homo sapiens |
| 113130    | cell division cycle associated 5                                                                       | Homo sapiens |
| 2063      | nuclear receptor subfamily 2, group F, member 6                                                        | Homo sapiens |
| 7779      | solute carrier family 30 (zinc transporter), member 1                                                  | Homo sapiens |
| 137695    | transmembrane protein 68                                                                               | Homo sapiens |
| 124512    | chromosome 17 open reading frame 95                                                                    | Homo sapiens |
| 9044      | BTAFl RNA polymerase II, B-TFIID transcription factor-associated, 170kDa (Mot1 homolog, S. cerevisiae) | Homo sapiens |
| 4799      | nuclear transcription factor, X-box binding 1                                                          | Homo sapiens |
| 29097     | cornichon homolog 4 (Drosophila)                                                                       | Homo sapiens |
| 50865     | heme binding protein 1                                                                                 | Homo sapiens |
| 644613    | hypothetical protein LOC644613                                                                         | Homo sapiens |
| 100287628 | hypothetical protein LOC100287628                                                                      | Homo sapiens |
| 151987    | protein phosphatase 4, regulatory subunit 2                                                            | Homo sapiens |
| 140691    | tripartite motif-containing 69                                                                         | Homo sapiens |
| 56997     | chaperone, ABC1 activity of bcl complex homolog (S. pombe)                                             | Homo sapiens |
| 9657      | IQ motif containing B1                                                                                 | Homo sapiens |
| 5106      | phosphoenolpyruvate carboxykinase 2 (mitochondrial)                                                    | Homo sapiens |
| 100287171 | similar to WAS protein family homolog 1                                                                | Homo sapiens |

|        |                                                                                                  |              |
|--------|--------------------------------------------------------------------------------------------------|--------------|
| 4318   | matrix metallopeptidase 9 (gelatinase B, 92kDa gelatinase, 92kDa type IV collagenase)            | Homo sapiens |
| 124411 | zinc finger protein 720                                                                          | Homo sapiens |
| 9775   | eukaryotic translation initiation factor 4A, isoform 3                                           | Homo sapiens |
| 55004  | chromosome 11 open reading frame 59                                                              | Homo sapiens |
| 90007  | midnolin                                                                                         | Homo sapiens |
| 125150 | zinc finger, SWIM-type containing 7                                                              | Homo sapiens |
| 23011  | RAB21, member RAS oncogene family                                                                | Homo sapiens |
| 9538   | etoposide induced 2.4 mRNA                                                                       | Homo sapiens |
| 56948  | short chain dehydrogenase/reductase family 39U, member 1                                         | Homo sapiens |
| 10087  | collagen, type IV, alpha 3 (Goodpasture antigen) binding protein                                 | Homo sapiens |
| 55222  | leucine rich repeat containing 20                                                                | Homo sapiens |
| 63917  | UDP-N-acetyl-alpha-D-galactosamine:polypeptide N-acetylgalactosaminyltransferase 11 (GalNAc-T11) | Homo sapiens |
| 50640  | patatin-like phospholipase domain containing 8                                                   | Homo sapiens |
| 157506 | retinol dehydrogenase 10 (all-trans)                                                             | Homo sapiens |
| 115106 | HAUS augmin-like complex, subunit 1                                                              | Homo sapiens |
| 6047   | ring finger protein 4; hypothetical LOC644006                                                    | Homo sapiens |
| 58517  | RNA binding motif protein 25                                                                     | Homo sapiens |
| 2519   | fucosidase, alpha-L- 2, plasma                                                                   | Homo sapiens |
| 85403  | ELL associated factor 1                                                                          | Homo sapiens |
| 23505  | transmembrane protein 131                                                                        | Homo sapiens |
| 6648   | superoxide dismutase 2, mitochondrial                                                            | Homo sapiens |
| 5073   | poly(A)-specific ribonuclease (deadenylation nuclease)                                           | Homo sapiens |
| 23310  | non-SMC condensin II complex, subunit D3                                                         | Homo sapiens |
| 58488  | phosphatidylcholine transfer protein                                                             | Homo sapiens |
| 3930   | lamin B receptor                                                                                 | Homo sapiens |
| 55602  | CDKN2A interacting protein                                                                       | Homo sapiens |
| 6874   | TAF4 RNA polymerase II, TATA box binding protein (TBP)-associated factor, 135kDa                 | Homo sapiens |
| 4775   | nuclear factor of activated T-cells, cytoplasmic, calcineurin-dependent 3                        | Homo sapiens |
| 24137  | kinesin family member 4B; kinesin family member 4A                                               | Homo sapiens |
| 22863  | KIAA0831                                                                                         | Homo sapiens |
| 79991  | oligonucleotide/oligosaccharide-binding fold containing 1                                        | Homo sapiens |
| 83605  | cerebral cavernous malformation 2                                                                | Homo sapiens |
| 8028   | myeloid/lymphoid or mixed-lineage leukemia (trithorax homolog, Drosophila); translocated to, 10  | Homo sapiens |
| 63976  | PR domain containing 16                                                                          | Homo sapiens |
| 64118  | dihydrouridine synthase 1-like (S. cerevisiae)                                                   | Homo sapiens |
| 4131   | microtubule-associated protein 1B                                                                | Homo sapiens |
| 9877   | zinc finger CCCH-type containing 11A                                                             | Homo sapiens |
| 55671  | SMEK homolog 1, suppressor of mek1 (Dictyostelium)                                               | Homo sapiens |
| 9343   | elongation factor Tu GTP binding domain containing 2                                             | Homo sapiens |
| 79140  | coiled-coil domain containing 28B                                                                | Homo sapiens |
| 81688  | chromosome 6 open reading frame 62                                                               | Homo sapiens |
| 39     | acetyl-Coenzyme A acetyltransferase 2                                                            | Homo sapiens |
| 60386  | solute carrier family 25 (mitochondrial thiamine pyrophosphate carrier), member 19               | Homo sapiens |
| 22809  | activating transcription factor 5                                                                | Homo sapiens |
| 23435  | TAR DNA binding protein                                                                          | Homo sapiens |
| 9682   | lysine (K)-specific demethylase 4A                                                               | Homo sapiens |
| 9953   | heparan sulfate (glucosamine) 3-O-sulfotransferase 3B1                                           | Homo sapiens |
| 23518  | R3H domain containing 1                                                                          | Homo sapiens |
| 1964   | eukaryotic translation initiation factor 1A, X-linked                                            | Homo sapiens |
| 23443  | solute carrier family 35 (UDP-N-acetylglucosamine (UDP-GlcNAc) transporter), member A3           | Homo sapiens |
| 3735   | lysyl-tRNA synthetase                                                                            | Homo sapiens |
| 165055 | coiled-coil domain containing 138                                                                | Homo sapiens |
| 3207   | homeobox A11                                                                                     | Homo sapiens |
| 22880  | MORC family CW-type zinc finger 2                                                                | Homo sapiens |
| 84527  | zinc finger protein 559                                                                          | Homo sapiens |
| 440400 | ribonuclease, RNase K                                                                            | Homo sapiens |
| 346887 | similar to solute carrier family 16 (monocarboxylic acid transporters), member 14                | Homo sapiens |
| 80742  | proline rich 3                                                                                   | Homo sapiens |
| 8879   | sphingosine-1-phosphate lyase 1                                                                  | Homo sapiens |
| 55168  | mitochondrial ribosomal protein S18A                                                             | Homo sapiens |
| 63931  | mitochondrial ribosomal protein S14                                                              | Homo sapiens |
| 10778  | zinc finger protein 271                                                                          | Homo sapiens |
| 2976   | general transcription factor IIIC, polypeptide 2, beta 110kDa                                    | Homo sapiens |
| 2091   | fibrillarin                                                                                      | Homo sapiens |
| 55661  | DEAD (Asp-Glu-Ala-Asp) box polypeptide 27                                                        | Homo sapiens |
| 285381 | DPH3, KTI11 homolog (S. cerevisiae); DPH3B, KTI11 homolog B (S. cerevisiae)                      | Homo sapiens |
| 59343  | SUMO1/sentrin/SMT3 specific peptidase 2                                                          | Homo sapiens |
| 63939  | chromosome 20 open reading frame 177                                                             | Homo sapiens |
| 25946  | zinc finger protein 385A                                                                         | Homo sapiens |
| 6100   | retinitis pigmentosa 9 (autosomal dominant)                                                      | Homo sapiens |
| 84168  | anthrax toxin receptor 1                                                                         | Homo sapiens |
| 285193 | dual specificity phosphatase 28                                                                  | Homo sapiens |
| 84650  | emopamil binding protein-like                                                                    | Homo sapiens |
| 26099  | chromosome 1 open reading frame 144                                                              | Homo sapiens |
| 204    | adenylate kinase 2                                                                               | Homo sapiens |



|           |                                                                                                                                                                                                        |              |
|-----------|--------------------------------------------------------------------------------------------------------------------------------------------------------------------------------------------------------|--------------|
| 891       | cyclin B1                                                                                                                                                                                              | Homo sapiens |
| 2305      | forkhead box M1                                                                                                                                                                                        | Homo sapiens |
| 11171     | serine/threonine kinase receptor associated protein                                                                                                                                                    | Homo sapiens |
| 90355     | chromosome 5 open reading frame 30                                                                                                                                                                     | Homo sapiens |
| 29072     | SET domain containing 2                                                                                                                                                                                | Homo sapiens |
| 25828     | thioredoxin 2                                                                                                                                                                                          | Homo sapiens |
| 8898      | myotubularin related protein 2                                                                                                                                                                         | Homo sapiens |
| 80198     | MUS81 endonuclease homolog (S. cerevisiae)                                                                                                                                                             | Homo sapiens |
| 1027      | cyclin-dependent kinase inhibitor 1B (p27, Kip1)                                                                                                                                                       | Homo sapiens |
| 400579    | FLJ35934 protein                                                                                                                                                                                       | Homo sapiens |
| 10313     | reticulon 3                                                                                                                                                                                            | Homo sapiens |
| 60488     | mitochondrial ribosomal protein S35                                                                                                                                                                    | Homo sapiens |
| 8677      | syntaxin 10                                                                                                                                                                                            | Homo sapiens |
| 7799      | PR domain containing 2, with ZNF domain                                                                                                                                                                | Homo sapiens |
| 51699     | vacuolar protein sorting 29 homolog (S. cerevisiae)                                                                                                                                                    | Homo sapiens |
| 10201     | non-metastatic cells 6, protein expressed in (nucleoside-diphosphate kinase)                                                                                                                           | Homo sapiens |
| 9439      | mediator complex subunit 23                                                                                                                                                                            | Homo sapiens |
| 100131755 | similar to hCG1792883                                                                                                                                                                                  | Homo sapiens |
| 55238     | solute carrier family 38, member 7                                                                                                                                                                     | Homo sapiens |
| 23451     | splicing factor 3b, subunit 1, 155kDa                                                                                                                                                                  | Homo sapiens |
| 10826     | chromosome 5 open reading frame 4                                                                                                                                                                      | Homo sapiens |
| 3188      | ribosomal protein L36a pseudogene 51; ribosomal protein L36a pseudogene 37; ribosomal protein L36a pseudogene 49; heterogeneous nuclear ribonucleoprotein H2 (H <sup>2</sup> ); ribosomal protein L36a | Homo sapiens |
| 6173      | ribosomal protein L36a pseudogene 51; ribosomal protein L36a pseudogene 37; ribosomal protein L36a pseudogene 49; heterogeneous nuclear ribonucleoprotein H2 (H <sup>2</sup> ); ribosomal protein L36a | Homo sapiens |
| 79848     | centrosome and spindle pole associated protein 1                                                                                                                                                       | Homo sapiens |
| 7812      | cold shock domain containing E1, RNA-binding                                                                                                                                                           | Homo sapiens |
| 22992     | lysine (K)-specific demethylase 2A                                                                                                                                                                     | Homo sapiens |
| 80324     | pseudouridylyl synthase 1                                                                                                                                                                              | Homo sapiens |
| 23398     | peptidylprolyl isomerase domain and WD repeat containing 1                                                                                                                                             | Homo sapiens |
| 9329      | general transcription factor IIIC, polypeptide 4, 90kDa                                                                                                                                                | Homo sapiens |
| 4140      | MAP/microtubule affinity-regulating kinase 3                                                                                                                                                           | Homo sapiens |
| 51582     | antizyme inhibitor 1                                                                                                                                                                                   | Homo sapiens |
| 2193      | phenylalanyl-tRNA synthetase, alpha subunit                                                                                                                                                            | Homo sapiens |
| 9510      | ADAM metalloproteinase with thrombospondin type 1 motif, 1                                                                                                                                             | Homo sapiens |
| 339005    | similar to WAS protein homolog associated with actin, golgi membranes and microtubules; WAS protein homolog associated with actin, golgi membranes and microtubules-like 1                             | Homo sapiens |
| 56063     | chromosome 1 open reading frame 91                                                                                                                                                                     | Homo sapiens |
| 5691      | proteasome (prosome, macropain) subunit, beta type, 3                                                                                                                                                  | Homo sapiens |
| 129531    | MIT, microtubule interacting and transport, domain containing 1                                                                                                                                        | Homo sapiens |
| 7050      | TGFB-induced factor homeobox 1                                                                                                                                                                         | Homo sapiens |
| 9040      | ubiquitin-conjugating enzyme E2M (UBC12 homolog, yeast); ubiquitin-conjugating enzyme E2M pseudogene 1                                                                                                 | Homo sapiens |
| 10247     | heat-responsive protein 12                                                                                                                                                                             | Homo sapiens |
| 10073     | snurportin 1                                                                                                                                                                                           | Homo sapiens |
| 151011    | septin 10                                                                                                                                                                                              | Homo sapiens |
| 54961     | slingshot homolog 3 (Drosophila)                                                                                                                                                                       | Homo sapiens |
| 54826     | gypsy retrotransposon integrase 1                                                                                                                                                                      | Homo sapiens |
| 1363      | carboxypeptidase E                                                                                                                                                                                     | Homo sapiens |
| 862       | runt-related transcription factor 1; translocated to, 1 (cyclin D-related)                                                                                                                             | Homo sapiens |
| 9375      | transmembrane 9 superfamily member 2                                                                                                                                                                   | Homo sapiens |
| 51076     | cutC copper transporter homolog (E. coli)                                                                                                                                                              | Homo sapiens |
| 5796      | protein tyrosine phosphatase, receptor type, K                                                                                                                                                         | Homo sapiens |
| 56731     | SLC2A4 regulator                                                                                                                                                                                       | Homo sapiens |
| 92092     | zinc finger CCCH-type, antiviral 1-like                                                                                                                                                                | Homo sapiens |
| 7068      | thyroid hormone receptor, beta (erythroblastic leukemia viral (v-erb-a) oncogene homolog 2, avian)                                                                                                     | Homo sapiens |
| 65059     | Ras association (RalGDS/AF-6) and pleckstrin homology domains 1                                                                                                                                        | Homo sapiens |
| 10810     | WAS protein family, member 3                                                                                                                                                                           | Homo sapiens |
| 467       | activating transcription factor 3                                                                                                                                                                      | Homo sapiens |
| 88455     | ankyrin repeat domain 13A                                                                                                                                                                              | Homo sapiens |
| 3394      | interferon regulatory factor 8                                                                                                                                                                         | Homo sapiens |
| 150678    | myeloma overexpressed 2                                                                                                                                                                                | Homo sapiens |
| 9318      | COP9 constitutive photomorphogenic homolog subunit 2 (Arabidopsis)                                                                                                                                     | Homo sapiens |
| 339324    | zinc finger protein 260                                                                                                                                                                                | Homo sapiens |
| 132949    | aminoadipate-semialdehyde dehydrogenase                                                                                                                                                                | Homo sapiens |
| 53918     | pelota homolog (Drosophila)                                                                                                                                                                            | Homo sapiens |
| 10827     | family with sequence similarity 114, member A2                                                                                                                                                         | Homo sapiens |
| 25880     | transmembrane protein 186                                                                                                                                                                              | Homo sapiens |
| 7251      | tumor susceptibility gene 101                                                                                                                                                                          | Homo sapiens |
| 2290      | forkhead box G1                                                                                                                                                                                        | Homo sapiens |
| 23078     | KIAA0564                                                                                                                                                                                               | Homo sapiens |
| 54941     | ring finger protein 125                                                                                                                                                                                | Homo sapiens |
| 114804    | ring finger protein 157                                                                                                                                                                                | Homo sapiens |
| 441733    | protein kinase, X-linked, pseudogene 1                                                                                                                                                                 | Homo sapiens |

|        |                                                                                                                   |              |
|--------|-------------------------------------------------------------------------------------------------------------------|--------------|
| 79001  | vitamin K epoxide reductase complex, subunit 1                                                                    | Homo sapiens |
| 6879   | TAF7 RNA polymerase II, TATA box binding protein (TBP)-associated factor, 55kDa                                   | Homo sapiens |
| 23545  | ATPase, H <sup>+</sup> transporting, lysosomal V0 subunit a2                                                      | Homo sapiens |
| 645566 | hypothetical LOC645566                                                                                            | Homo sapiens |
| 9275   | B-cell CLL/lymphoma 7B                                                                                            | Homo sapiens |
| 79810  | pentatricopeptide repeat domain 2                                                                                 | Homo sapiens |
| 55069  | chromosome 7 open reading frame 42                                                                                | Homo sapiens |
| 114088 | tripartite motif-containing 9                                                                                     | Homo sapiens |
| 23446  | solute carrier family 44, member 1                                                                                | Homo sapiens |
| 1111   | CHK1 checkpoint homolog (S. pombe)                                                                                | Homo sapiens |
| 8467   | SWI/SNF related, matrix associated, actin dependent regulator of chromatin, subfamily a, member 5                 | Homo sapiens |
| 55132  | La ribonucleoprotein domain family, member 1B                                                                     | Homo sapiens |
| 56261  | hypothetical protein KIAA1434                                                                                     | Homo sapiens |
| 6495   | SIX homeobox 1                                                                                                    | Homo sapiens |
| 6627   | small nuclear ribonucleoprotein polypeptide A'                                                                    | Homo sapiens |
| 29116  | myosin regulatory light chain interacting protein                                                                 | Homo sapiens |
| 23351  | KIAA0323                                                                                                          | Homo sapiens |
| 27338  | ubiquitin-conjugating enzyme E2S                                                                                  | Homo sapiens |
| 5478   | similar to TRIMCyp; peptidylprolyl isomerase A (cyclophilin A); peptidylprolyl isomerase A (cyclophilin A)-like 3 | Homo sapiens |
| 26277  | TERF1 (TRF1)-interacting nuclear factor 2                                                                         | Homo sapiens |
| 113829 | solute carrier family 35, member A4                                                                               | Homo sapiens |
| 51497  | TH1-like (Drosophila)                                                                                             | Homo sapiens |
| 54677  | carnitine O-octanoyltransferase                                                                                   | Homo sapiens |
| 23548  | tetratricopeptide repeat domain 33                                                                                | Homo sapiens |
| 283508 | hypothetical protein LOC283508                                                                                    | Homo sapiens |
| 84246  | mediator complex subunit 10                                                                                       | Homo sapiens |
| 91687  | centromere protein L                                                                                              | Homo sapiens |
| 23173  | methionyl aminopeptidase 1                                                                                        | Homo sapiens |
| 151009 | hypothetical LOC151009                                                                                            | Homo sapiens |
| 8881   | cell division cycle 16 homolog (S. cerevisiae)                                                                    | Homo sapiens |
| 1861   | torsin family 1, member A (torsin A)                                                                              | Homo sapiens |
| 54443  | anillin, actin binding protein                                                                                    | Homo sapiens |
| 4520   | metal-regulatory transcription factor 1                                                                           | Homo sapiens |
| 3551   | inhibitor of kappa light polypeptide gene enhancer in B-cells, kinase beta                                        | Homo sapiens |
| 126308 | MOB1, Mps One Binder kinase activator-like 2A (yeast)                                                             | Homo sapiens |
| 27235  | coenzyme Q2 homolog, prenyltransferase (yeast)                                                                    | Homo sapiens |
| 387066 | small nucleolar RNA host gene 5 (non-protein coding)                                                              | Homo sapiens |
| 113000 | RNA pseudouridylate synthase domain containing 1                                                                  | Homo sapiens |
| 54753  | zinc finger protein 853                                                                                           | Homo sapiens |
| 339229 | chromosome 17 open reading frame 90                                                                               | Homo sapiens |
| 9261   | mitogen-activated protein kinase-activated protein kinase 2                                                       | Homo sapiens |
| 400916 | coiled-coil-helix-coiled-coil-helix domain containing 10                                                          | Homo sapiens |
| 51030  | family with sequence similarity 18, member B2; family with sequence similarity 18, member B                       | Homo sapiens |
| 5436   | polymerase (RNA) II (DNA directed) polypeptide G                                                                  | Homo sapiens |
| 22881  | ankyrin repeat domain 6                                                                                           | Homo sapiens |
| 9887   | Smg-7 homolog, nonsense mediated mRNA decay factor (C. elegans)                                                   | Homo sapiens |
| 11212  | proline synthetase co-transcribed homolog (bacterial)                                                             | Homo sapiens |
| 1797   | dom-3 homolog Z (C. elegans)                                                                                      | Homo sapiens |
| 23471  | translocation associated membrane protein 1                                                                       | Homo sapiens |
| 7813   | ecotropic viral integration site 5                                                                                | Homo sapiens |
| 84293  | chromosome 10 open reading frame 58; chromosome 10 open reading frame 57                                          | Homo sapiens |
| 221895 | JAZF zinc finger 1                                                                                                | Homo sapiens |
| 81025  | gap junction protein, alpha 9, 59kDa                                                                              | Homo sapiens |
| 3213   | homeobox B3                                                                                                       | Homo sapiens |
| 16     | alanyl-tRNA synthetase                                                                                            | Homo sapiens |
| 28991  | COMM domain containing 5                                                                                          | Homo sapiens |
| 23432  | G protein-coupled receptor 161                                                                                    | Homo sapiens |
| 9716   | aquarius homolog (mouse)                                                                                          | Homo sapiens |
| 7514   | exportin 1 (CRM1 homolog, yeast)                                                                                  | Homo sapiens |
| 25847  | anaphase promoting complex subunit 13                                                                             | Homo sapiens |
| 199990 | chromosome 1 open reading frame 86                                                                                | Homo sapiens |
| 83940  | TatD DNase domain containing 1                                                                                    | Homo sapiens |
| 9586   | cAMP responsive element binding protein 5                                                                         | Homo sapiens |
| 51271  | ubiquitin associated protein 1                                                                                    | Homo sapiens |
| 51427  | zinc finger protein 107                                                                                           | Homo sapiens |
| 79682  | MLF1 interacting protein                                                                                          | Homo sapiens |
| 1108   | chromodomain helicase DNA binding protein 4                                                                       | Homo sapiens |
| 1508   | cathepsin B                                                                                                       | Homo sapiens |
| 79813  | euchromatic histone-lysine N-methyltransferase 1                                                                  | Homo sapiens |
| 10632  | ATP synthase, H <sup>+</sup> transporting, mitochondrial F0 complex, subunit G                                    | Homo sapiens |
| 79834  | NKF3 kinase family member                                                                                         | Homo sapiens |
| 23224  | spectrin repeat containing, nuclear envelope 2                                                                    | Homo sapiens |
| 23705  | cell adhesion molecule 1                                                                                          | Homo sapiens |
| 8731   | RNA (guanine-7-) methyltransferase                                                                                | Homo sapiens |

|        |                                                                                                                                                                          |              |
|--------|--------------------------------------------------------------------------------------------------------------------------------------------------------------------------|--------------|
| 740    | mitochondrial ribosomal protein L49                                                                                                                                      | Homo sapiens |
| 23433  | ras homolog gene family, member Q; similar to small GTP binding protein TC10                                                                                             | Homo sapiens |
| 8036   | soc-2 suppressor of clear homolog (C. elegans)                                                                                                                           | Homo sapiens |
| 51569  | ubiquitin-fold modifier 1                                                                                                                                                | Homo sapiens |
| 9650   | mitochondrial fission regulator 1                                                                                                                                        | Homo sapiens |
| 7704   | zinc finger and BTB domain containing 16                                                                                                                                 | Homo sapiens |
| 8540   | alkylglycerone phosphate synthase                                                                                                                                        | Homo sapiens |
| 9448   | mitogen-activated protein kinase kinase kinase kinase 4                                                                                                                  | Homo sapiens |
| 54510  | protocadherin 18                                                                                                                                                         | Homo sapiens |
| 79685  | SAP30-like                                                                                                                                                               | Homo sapiens |
| 51070  | nitric oxide synthase interacting protein                                                                                                                                | Homo sapiens |
| 84524  | zinc finger CCCH-type containing 8                                                                                                                                       | Homo sapiens |
| 79084  | WD repeat domain 77                                                                                                                                                      | Homo sapiens |
| 5770   | protein tyrosine phosphatase, non-receptor type 1                                                                                                                        | Homo sapiens |
| 5435   | polymerase (RNA) II (DNA directed) polypeptide F                                                                                                                         | Homo sapiens |
| 23140  | zinc finger, ZZ-type with EF-hand domain 1                                                                                                                               | Homo sapiens |
| 54812  | aftiphilin                                                                                                                                                               | Homo sapiens |
| 79921  | transcription elongation factor A (SII)-like 4                                                                                                                           | Homo sapiens |
| 1954   | multiple EGF-like-domains 8                                                                                                                                              | Homo sapiens |
| 3454   | interferon (alpha, beta and omega) receptor 1                                                                                                                            | Homo sapiens |
| 11311  | vacuolar protein sorting 45 homolog (S. cerevisiae)                                                                                                                      | Homo sapiens |
| 80209  | chromosome 13 open reading frame 23                                                                                                                                      | Homo sapiens |
| 10026  | phosphatidylinositol glycan anchor biosynthesis, class K                                                                                                                 | Homo sapiens |
| 7073   | TIAl cytotoxic granule-associated RNA binding protein-like 1                                                                                                             | Homo sapiens |
| 57799  | RAB40C, member RAS oncogene family                                                                                                                                       | Homo sapiens |
| 55967  | NADH dehydrogenase (ubiquinone) 1 alpha subcomplex, 12                                                                                                                   | Homo sapiens |
| 3992   | fatty acid desaturase 1                                                                                                                                                  | Homo sapiens |
| 2788   | guanine nucleotide binding protein (G protein), gamma 7                                                                                                                  | Homo sapiens |
| 8772   | Fas (TNFRSF6)-associated via death domain                                                                                                                                | Homo sapiens |
| 1849   | dual specificity phosphatase 7                                                                                                                                           | Homo sapiens |
| 10093  | tubulin tyrosine ligase-like family, member 3; actin related protein 2/3 complex, subunit 4, 20kDa                                                                       | Homo sapiens |
| 3423   | iduronate 2-sulfatase                                                                                                                                                    | Homo sapiens |
| 9497   | solute carrier family 4, sodium bicarbonate cotransporter, member 7                                                                                                      | Homo sapiens |
| 9993   | DiGeorge syndrome critical region gene 2                                                                                                                                 | Homo sapiens |
| 284252 | potassium channel tetramerisation domain containing 1                                                                                                                    | Homo sapiens |
| 55198  | adaptor protein, phosphotyrosine interaction, PH domain and leucine zipper containing 2                                                                                  | Homo sapiens |
| 79101  | TATA box binding protein (TBP)-associated factor, RNA polymerase I, D, 41kDa; small nucleolar RNA, H/ACA box 32; small nucleolar RNA, H/ACA box 25                       | Homo sapiens |
| 9562   | multiple inositol polyphosphate histidine phosphatase, 1                                                                                                                 | Homo sapiens |
| 57103  | chromosome 12 open reading frame 5                                                                                                                                       | Homo sapiens |
| 567    | beta-2-microglobulin                                                                                                                                                     | Homo sapiens |
| 55339  | WD repeat domain 33                                                                                                                                                      | Homo sapiens |
| 6117   | replication protein A1, 70kDa                                                                                                                                            | Homo sapiens |
| 2720   | galactosidase, beta 1                                                                                                                                                    | Homo sapiens |
| 1008   | cadherin 10, type 2 (T2-cadherin)                                                                                                                                        | Homo sapiens |
| 7327   | ubiquitin-conjugating enzyme E2G 2 (UBC7 homolog, yeast)                                                                                                                 | Homo sapiens |
| 54505  | DEAH (Asp-Glu-Ala-His) box polypeptide 29                                                                                                                                | Homo sapiens |
| 5682   | proteasome (prosome, macropain) subunit, alpha type, 1                                                                                                                   | Homo sapiens |
| 27109  | ATP synthase, H+ transporting, mitochondrial F0 complex, subunit s (factor B)                                                                                            | Homo sapiens |
| 9469   | carbohydrate (chondroitin 6) sulfotransferase 3                                                                                                                          | Homo sapiens |
| 56475  | reprimin, TP53 dependent G2 arrest mediator candidate                                                                                                                    | Homo sapiens |
| 54477  | pleckstrin homology domain containing, family A member 5                                                                                                                 | Homo sapiens |
| 55735  | DnaJ (Hsp40) homolog, subfamily C, member 11                                                                                                                             | Homo sapiens |
| 51360  | membrane-bound transcription factor peptidase, site 2                                                                                                                    | Homo sapiens |
| 92609  | translocase of inner mitochondrial membrane 50 homolog (S. cerevisiae)                                                                                                   | Homo sapiens |
| 5427   | polymerase (DNA directed), epsilon 2 (p59 subunit)                                                                                                                       | Homo sapiens |
| 8085   | myeloid/lymphoid or mixed-lineage leukemia 2                                                                                                                             | Homo sapiens |
| 81572  | p53 and DNA-damage regulated 1                                                                                                                                           | Homo sapiens |
| 128486 | fat storage-inducing transmembrane protein 2                                                                                                                             | Homo sapiens |
| 55627  | sphingomyelin phosphodiesterase 4, neutral membrane (neutral sphingomyelinase-3)                                                                                         | Homo sapiens |
| 1020   | cyclin-dependent kinase 5                                                                                                                                                | Homo sapiens |
| 221477 | chromosome 6 open reading frame 89                                                                                                                                       | Homo sapiens |
| 115426 | ubiquitin-like with PHD and ring finger domains 2                                                                                                                        | Homo sapiens |
| 10884  | mitochondrial ribosomal protein S30                                                                                                                                      | Homo sapiens |
| 26276  | vacuolar protein sorting 33 homolog B (yeast)                                                                                                                            | Homo sapiens |
| 6154   | ribosomal protein L26 pseudogene 33; ribosomal protein L26; ribosomal protein L26 pseudogene 16; ribosomal protein L26 pseudogene 19; ribosomal protein L26 pseudogene 6 | Homo sapiens |
| 29098  | RAN guanine nucleotide release factor                                                                                                                                    | Homo sapiens |
| 8726   | embryonic ectoderm development                                                                                                                                           | Homo sapiens |
| 55695  | NOL1/NOP2/Sun domain family, member 5                                                                                                                                    | Homo sapiens |
| 10681  | guanine nucleotide binding protein (G protein), beta 5                                                                                                                   | Homo sapiens |
| 8924   | hect domain and RLD 2                                                                                                                                                    | Homo sapiens |
| 84364  | ADP-ribosylation factor GTPase activating protein 2                                                                                                                      | Homo sapiens |
| 6558   | solute carrier family 12 (sodium/potassium/chloride transporters), member 2                                                                                              | Homo sapiens |
| 6687   | spastic paraplegia 7 (pure and complicated autosomal recessive)                                                                                                          | Homo sapiens |
| 51307  | family with sequence similarity 53, member C                                                                                                                             | Homo sapiens |

|        |                                                                                                                                                                                    |              |
|--------|------------------------------------------------------------------------------------------------------------------------------------------------------------------------------------|--------------|
| 3295   | hydroxysteroid (17-beta) dehydrogenase 4                                                                                                                                           | Homo sapiens |
| 284106 | CDGSH iron sulfur domain 3                                                                                                                                                         | Homo sapiens |
| 51126  | N-acetyltransferase 5 (GCN5-related, putative)                                                                                                                                     | Homo sapiens |
| 6611   | spermine synthase; similar to spermine synthase                                                                                                                                    | Homo sapiens |
| 2044   | EPH receptor A5                                                                                                                                                                    | Homo sapiens |
| 27297  | CGRP receptor component                                                                                                                                                            | Homo sapiens |
| 8106   | poly(A) binding protein, nuclear 1                                                                                                                                                 | Homo sapiens |
| 92014  | mitochondrial carrier triple repeat 1                                                                                                                                              | Homo sapiens |
| 619423 | family with sequence similarity 85, member A                                                                                                                                       | Homo sapiens |
| 55137  | fidgetin                                                                                                                                                                           | Homo sapiens |
| 154881 | potassium channel tetramerisation domain containing 7                                                                                                                              | Homo sapiens |
| 55830  | glycosyltransferase 8 domain containing 1                                                                                                                                          | Homo sapiens |
| 58190  | CTD (carboxy-terminal domain, RNA polymerase II, polypeptide A) small phosphatase 1                                                                                                | Homo sapiens |
| 54462  | KIAA1128                                                                                                                                                                           | Homo sapiens |
| 60684  | chromosome 4 open reading frame 41                                                                                                                                                 | Homo sapiens |
| 6015   | ring finger protein 1                                                                                                                                                              | Homo sapiens |
| 27153  | zinc finger protein 777                                                                                                                                                            | Homo sapiens |
| 64771  | chromosome 6 open reading frame 106                                                                                                                                                | Homo sapiens |
| 53340  | sperm autoantigenic protein 17                                                                                                                                                     | Homo sapiens |
| 574029 | dual specificity phosphatase 5 pseudogene                                                                                                                                          | Homo sapiens |
| 80227  | proteasomal ATPase-associated factor 1                                                                                                                                             | Homo sapiens |
| 11334  | tumor suppressor candidate 2                                                                                                                                                       | Homo sapiens |
| 56254  | ring finger protein 20                                                                                                                                                             | Homo sapiens |
| 501    | aldehyde dehydrogenase 7 family, member A1                                                                                                                                         | Homo sapiens |
| 22950  | solute carrier family 4 (anion exchanger), member 1, adaptor protein                                                                                                               | Homo sapiens |
| 10746  | mitogen-activated protein kinase kinase kinase 2                                                                                                                                   | Homo sapiens |
| 9053   | microtubule-associated protein 7                                                                                                                                                   | Homo sapiens |
| 23336  | synemin, intermediate filament protein                                                                                                                                             | Homo sapiens |
| 23596  | opsin 3                                                                                                                                                                            | Homo sapiens |
| 2618   | phosphoribosylglycinamide formyltransferase, phosphoribosylglycinamide synthetase, phosphoribosylaminoimidazole synthetase                                                         | Homo sapiens |
| 57037  | ankyrin repeat and MYND domain containing 2                                                                                                                                        | Homo sapiens |
| 55216  | chromosome 11 open reading frame 57                                                                                                                                                | Homo sapiens |
| 91368  | CDKN2A interacting protein N-terminal like                                                                                                                                         | Homo sapiens |
| 8019   | bromodomain containing 3                                                                                                                                                           | Homo sapiens |
| 3516   | recombination signal binding protein for immunoglobulin kappa J region                                                                                                             | Homo sapiens |
| 4289   | muskelin 1, intracellular mediator containing kelch motifs                                                                                                                         | Homo sapiens |
| 113402 | SFT2 domain containing 1                                                                                                                                                           | Homo sapiens |
| 22906  | trafficking protein, kinesin binding 1                                                                                                                                             | Homo sapiens |
| 9891   | NUAK family, SNF1-like kinase, 1                                                                                                                                                   | Homo sapiens |
| 9787   | discs, large (Drosophila) homolog-associated protein 5                                                                                                                             | Homo sapiens |
| 27347  | serine threonine kinase 39 (STE20/SPS1 homolog, yeast)                                                                                                                             | Homo sapiens |
| 9927   | mitofusin 2                                                                                                                                                                        | Homo sapiens |
| 440104 | hypothetical LOC440104                                                                                                                                                             | Homo sapiens |
| 2997   | glycogen synthase 1 (muscle)                                                                                                                                                       | Homo sapiens |
| 85236  | histone cluster 1, H2bk                                                                                                                                                            | Homo sapiens |
| 7582   | zinc finger protein 33B                                                                                                                                                            | Homo sapiens |
| 7417   | voltage-dependent anion channel 2                                                                                                                                                  | Homo sapiens |
| 55897  | mesoderm posterior 1 homolog (mouse)                                                                                                                                               | Homo sapiens |
| 128637 | TBC1 domain family, member 20                                                                                                                                                      | Homo sapiens |
| 9143   | synaptogyrin 3                                                                                                                                                                     | Homo sapiens |
| 585    | Bardet-Biedl syndrome 4                                                                                                                                                            | Homo sapiens |
| 54549  | sidekick homolog 2 (chicken)                                                                                                                                                       | Homo sapiens |
| 2887   | growth factor receptor-bound protein 10                                                                                                                                            | Homo sapiens |
| 2534   | FYN oncogene related to SRC, FGR, YES                                                                                                                                              | Homo sapiens |
| 1371   | coproporphyrinogen oxidase                                                                                                                                                         | Homo sapiens |
| 57707  | KIAA1609                                                                                                                                                                           | Homo sapiens |
| 7067   | thyroid hormone receptor, alpha (erythroblastic leukemia viral (v-erb-a) oncogene homolog, avian)                                                                                  | Homo sapiens |
| 25977  | NECAP endocytosis associated 1                                                                                                                                                     | Homo sapiens |
| 57180  | ARP3 actin-related protein 3 homolog B (yeast)                                                                                                                                     | Homo sapiens |
| 6905   | tubulin folding cofactor E                                                                                                                                                         | Homo sapiens |
| 64968  | mitochondrial ribosomal protein S6                                                                                                                                                 | Homo sapiens |
| 84612  | par-6 partitioning defective 6 homolog beta (C. elegans)                                                                                                                           | Homo sapiens |
| 286052 | hypothetical protein LOC286052                                                                                                                                                     | Homo sapiens |
| 112398 | egl nine homolog 2 (C. elegans)                                                                                                                                                    | Homo sapiens |
| 26953  | RAN binding protein 6                                                                                                                                                              | Homo sapiens |
| 7737   | ring finger protein 113A                                                                                                                                                           | Homo sapiens |
| 55326  | 1-acylglycerol-3-phosphate 0-acyltransferase 5 (lysophosphatidic acid acyltransferase, epsilon)                                                                                    | Homo sapiens |
| 4074   | mannose-6-phosphate receptor (cation dependent)                                                                                                                                    | Homo sapiens |
| 1062   | centromere protein E, 312kDa                                                                                                                                                       | Homo sapiens |
| 84950  | PRP38 pre-mRNA processing factor 38 (yeast) domain containing A                                                                                                                    | Homo sapiens |
| 8263   | coagulation factor VIII-associated (intronic transcript) 2; coagulation factor VIII-associated (intronic transcript) 3; coagulation factor VIII-associated (intronic transcript) 1 | Homo sapiens |

|           |                                                                                                                                                                                                                                                                                                                                                                                                                                                                    |              |
|-----------|--------------------------------------------------------------------------------------------------------------------------------------------------------------------------------------------------------------------------------------------------------------------------------------------------------------------------------------------------------------------------------------------------------------------------------------------------------------------|--------------|
| 474383    | coagulation factor VIII-associated (intronic transcript) 2; coagulation factor VIII-associated (intronic transcript) 3; coagulation factor VIII-associated (intronic transcript) 1                                                                                                                                                                                                                                                                                 | Homo sapiens |
| 474384    | coagulation factor VIII-associated (intronic transcript) 2; coagulation factor VIII-associated (intronic transcript) 3; coagulation factor VIII-associated (intronic transcript) 1                                                                                                                                                                                                                                                                                 | Homo sapiens |
| 64776     | chromosome 11 open reading frame 1                                                                                                                                                                                                                                                                                                                                                                                                                                 | Homo sapiens |
| 91749     | KIAA1919                                                                                                                                                                                                                                                                                                                                                                                                                                                           | Homo sapiens |
| 92815     | histone cluster 3, H2a                                                                                                                                                                                                                                                                                                                                                                                                                                             | Homo sapiens |
| 56882     | CDC42 small effector 1                                                                                                                                                                                                                                                                                                                                                                                                                                             | Homo sapiens |
| 28957     | mitochondrial ribosomal protein S28                                                                                                                                                                                                                                                                                                                                                                                                                                | Homo sapiens |
| 79930     | docking protein 3                                                                                                                                                                                                                                                                                                                                                                                                                                                  | Homo sapiens |
| 10036     | chromatin assembly factor 1, subunit A (p150)                                                                                                                                                                                                                                                                                                                                                                                                                      | Homo sapiens |
| 60487     | tRNA methyltransferase 11 homolog ( <i>S. cerevisiae</i> )                                                                                                                                                                                                                                                                                                                                                                                                         | Homo sapiens |
| 667       | dystonin                                                                                                                                                                                                                                                                                                                                                                                                                                                           | Homo sapiens |
| 4050      | lymphotoxin beta (TNF superfamily, member 3)                                                                                                                                                                                                                                                                                                                                                                                                                       | Homo sapiens |
| 51693     | trafficking protein particle complex 2-like                                                                                                                                                                                                                                                                                                                                                                                                                        | Homo sapiens |
| 6189      | ribosomal protein S3A pseudogene 5; ribosomal protein S3a pseudogene 47; ribosomal protein S3a pseudogene 49; ribosomal protein S3A; hypothetical LOC100131699; hypothetical LOC100130107                                                                                                                                                                                                                                                                          | Homo sapiens |
| 7371      | uridine-cytidine kinase 2                                                                                                                                                                                                                                                                                                                                                                                                                                          | Homo sapiens |
| 79886     | chromosome 9 open reading frame 82                                                                                                                                                                                                                                                                                                                                                                                                                                 | Homo sapiens |
| 84919     | protein phosphatase 1, regulatory (inhibitor) subunit 15B                                                                                                                                                                                                                                                                                                                                                                                                          | Homo sapiens |
| 84255     | solute carrier family 37 (glycerol-3-phosphate transporter), member 3                                                                                                                                                                                                                                                                                                                                                                                              | Homo sapiens |
| 283635    | family with sequence similarity 177, member A1                                                                                                                                                                                                                                                                                                                                                                                                                     | Homo sapiens |
| 84549     | MAK16 homolog ( <i>S. cerevisiae</i> )                                                                                                                                                                                                                                                                                                                                                                                                                             | Homo sapiens |
| 440675    | neuroblastoma breakpoint family, member 15; neuroblastoma breakpoint family, member 14; neuroblastoma breakpoint family, member 9; neuroblastoma breakpoint family, member 11; neuroblastoma breakpoint family, member 11-like; neuroblastoma breakpoint family, member 10; neuroblastoma breakpoint family, member 12; neuroblastoma breakpoint family, member 20; neuroblastoma breakpoint family, member 1; KIAA1245; neuroblastoma breakpoint family, member 8 | Homo sapiens |
| 55672     | neuroblastoma breakpoint family, member 15; neuroblastoma breakpoint family, member 14; neuroblastoma breakpoint family, member 9; neuroblastoma breakpoint family, member 11; neuroblastoma breakpoint family, member 11-like; neuroblastoma breakpoint family, member 10; neuroblastoma breakpoint family, member 12; neuroblastoma breakpoint family, member 20; neuroblastoma breakpoint family, member 1; KIAA1245; neuroblastoma breakpoint family, member 8 | Homo sapiens |
| 284565    | neuroblastoma breakpoint family, member 15; neuroblastoma breakpoint family, member 14; neuroblastoma breakpoint family, member 9; neuroblastoma breakpoint family, member 11; neuroblastoma breakpoint family, member 11-like; neuroblastoma breakpoint family, member 10; neuroblastoma breakpoint family, member 12; neuroblastoma breakpoint family, member 20; neuroblastoma breakpoint family, member 1; KIAA1245; neuroblastoma breakpoint family, member 8 | Homo sapiens |
| 728841    | neuroblastoma breakpoint family, member 15; neuroblastoma breakpoint family, member 14; neuroblastoma breakpoint family, member 9; neuroblastoma breakpoint family, member 11; neuroblastoma breakpoint family, member 11-like; neuroblastoma breakpoint family, member 10; neuroblastoma breakpoint family, member 12; neuroblastoma breakpoint family, member 20; neuroblastoma breakpoint family, member 1; KIAA1245; neuroblastoma breakpoint family, member 8 | Homo sapiens |
| 200030    | neuroblastoma breakpoint family, member 15; neuroblastoma breakpoint family, member 14; neuroblastoma breakpoint family, member 9; neuroblastoma breakpoint family, member 11; neuroblastoma breakpoint family, member 11-like; neuroblastoma breakpoint family, member 10; neuroblastoma breakpoint family, member 12; neuroblastoma breakpoint family, member 20; neuroblastoma breakpoint family, member 1; KIAA1245; neuroblastoma breakpoint family, member 8 | Homo sapiens |
| 100132406 | neuroblastoma breakpoint family, member 15; neuroblastoma breakpoint family, member 14; neuroblastoma breakpoint family, member 9; neuroblastoma breakpoint family, member 11; neuroblastoma breakpoint family, member 11-like; neuroblastoma breakpoint family, member 10; neuroblastoma breakpoint family, member 12; neuroblastoma breakpoint family, member 20; neuroblastoma breakpoint family, member 1; KIAA1245; neuroblastoma breakpoint family, member 8 | Homo sapiens |
| 400818    | neuroblastoma breakpoint family, member 15; neuroblastoma breakpoint family, member 14; neuroblastoma breakpoint family, member 9; neuroblastoma breakpoint family, member 11; neuroblastoma breakpoint family, member 11-like; neuroblastoma breakpoint family, member 10; neuroblastoma breakpoint family, member 12; neuroblastoma breakpoint family, member 20; neuroblastoma breakpoint family, member 1; KIAA1245; neuroblastoma breakpoint family, member 8 | Homo sapiens |
| 728912    | neuroblastoma breakpoint family, member 15; neuroblastoma breakpoint family, member 14; neuroblastoma breakpoint family, member 9; neuroblastoma breakpoint family, member 11; neuroblastoma breakpoint family, member 11-like; neuroblastoma breakpoint family, member 10; neuroblastoma breakpoint family, member 12; neuroblastoma breakpoint family, member 20; neuroblastoma breakpoint family, member 1; KIAA1245; neuroblastoma breakpoint family, member 8 | Homo sapiens |

|           |                                                                                                                                                                                                                                                                                                                                                                                                                                                                    |              |
|-----------|--------------------------------------------------------------------------------------------------------------------------------------------------------------------------------------------------------------------------------------------------------------------------------------------------------------------------------------------------------------------------------------------------------------------------------------------------------------------|--------------|
| 25832     | neuroblastoma breakpoint family, member 15; neuroblastoma breakpoint family, member 14; neuroblastoma breakpoint family, member 9; neuroblastoma breakpoint family, member 11; neuroblastoma breakpoint family, member 11-like; neuroblastoma breakpoint family, member 10; neuroblastoma breakpoint family, member 12; neuroblastoma breakpoint family, member 20; neuroblastoma breakpoint family, member 1; KIAA1245; neuroblastoma breakpoint family, member 8 | Homo sapiens |
| 23271     | calmodulin regulated spectrin-associated protein 1-like 1                                                                                                                                                                                                                                                                                                                                                                                                          | Homo sapiens |
| 54821     | excision repair cross-complementing rodent repair deficiency, complementation group 6-like                                                                                                                                                                                                                                                                                                                                                                         | Homo sapiens |
| 3097      | human immunodeficiency virus type I enhancer binding protein 2                                                                                                                                                                                                                                                                                                                                                                                                     | Homo sapiens |
| 26019     | UPF2 regulator of nonsense transcripts homolog (yeast)                                                                                                                                                                                                                                                                                                                                                                                                             | Homo sapiens |
| 2967      | general transcription factor IIH, polypeptide 3, 34kDa                                                                                                                                                                                                                                                                                                                                                                                                             | Homo sapiens |
| 91603     | zinc finger protein 830                                                                                                                                                                                                                                                                                                                                                                                                                                            | Homo sapiens |
| 129685    | TAF8 RNA polymerase II, TATA box binding protein (TBP)-associated factor, 43kDa                                                                                                                                                                                                                                                                                                                                                                                    | Homo sapiens |
| 2034      | endothelial PAS domain protein 1                                                                                                                                                                                                                                                                                                                                                                                                                                   | Homo sapiens |
| 55837     | E2F-associated phosphoprotein                                                                                                                                                                                                                                                                                                                                                                                                                                      | Homo sapiens |
| 221960    | chromosome 7 open reading frame 28A; similar to Chromosome 7 open reading frame 28B; chromosome 7 open reading frame 28B                                                                                                                                                                                                                                                                                                                                           | Homo sapiens |
| 51622     | chromosome 7 open reading frame 28A; similar to Chromosome 7 open reading frame 28B; chromosome 7 open reading frame 28B                                                                                                                                                                                                                                                                                                                                           | Homo sapiens |
| 51056     | leucine aminopeptidase 3                                                                                                                                                                                                                                                                                                                                                                                                                                           | Homo sapiens |
| 25852     | armadillo repeat containing 8                                                                                                                                                                                                                                                                                                                                                                                                                                      | Homo sapiens |
| 3320      | heat shock protein 90kDa alpha (cytosolic), class A member 2; heat shock protein 90kDa alpha (cytosolic), class A member 1                                                                                                                                                                                                                                                                                                                                         | Homo sapiens |
| 51176     | lymphoid enhancer-binding factor 1                                                                                                                                                                                                                                                                                                                                                                                                                                 | Homo sapiens |
| 55272     | IMP3, U3 small nucleolar ribonucleoprotein, homolog (yeast)                                                                                                                                                                                                                                                                                                                                                                                                        | Homo sapiens |
| 3984      | LIM domain kinase 1                                                                                                                                                                                                                                                                                                                                                                                                                                                | Homo sapiens |
| 375061    | family with sequence similarity 89, member A                                                                                                                                                                                                                                                                                                                                                                                                                       | Homo sapiens |
| 260425    | membrane associated guanylate kinase, WW and PDZ domain containing 3                                                                                                                                                                                                                                                                                                                                                                                               | Homo sapiens |
| 9320      | thyroid hormone receptor interactor 12                                                                                                                                                                                                                                                                                                                                                                                                                             | Homo sapiens |
| 51248     | PDZ domain containing 11                                                                                                                                                                                                                                                                                                                                                                                                                                           | Homo sapiens |
| 7345      | ubiquitin carboxyl-terminal esterase L1 (ubiquitin thiolesterase)                                                                                                                                                                                                                                                                                                                                                                                                  | Homo sapiens |
| 51218     | glutaredoxin 5                                                                                                                                                                                                                                                                                                                                                                                                                                                     | Homo sapiens |
| 7320      | ubiquitin-conjugating enzyme E2B (RAD6 homolog)                                                                                                                                                                                                                                                                                                                                                                                                                    | Homo sapiens |
| 8803      | succinate-CoA ligase, ADP-forming, beta subunit                                                                                                                                                                                                                                                                                                                                                                                                                    | Homo sapiens |
| 653061    | similar to Golgin subfamily A member 8-like protein 1                                                                                                                                                                                                                                                                                                                                                                                                              | Homo sapiens |
| 23265     | exocyst complex component 7                                                                                                                                                                                                                                                                                                                                                                                                                                        | Homo sapiens |
| 23510     | potassium channel tetramerisation domain containing 2                                                                                                                                                                                                                                                                                                                                                                                                              | Homo sapiens |
| 9039      | ubiquitin-like modifier activating enzyme 3                                                                                                                                                                                                                                                                                                                                                                                                                        | Homo sapiens |
| 3705      | inositol 1,3,4-triphosphate 5/6 kinase                                                                                                                                                                                                                                                                                                                                                                                                                             | Homo sapiens |
| 79020     | chromosome 7 open reading frame 25                                                                                                                                                                                                                                                                                                                                                                                                                                 | Homo sapiens |
| 23034     | sterile alpha motif domain containing 4A                                                                                                                                                                                                                                                                                                                                                                                                                           | Homo sapiens |
| 100287676 | hypothetical protein LOC100287676                                                                                                                                                                                                                                                                                                                                                                                                                                  | Homo sapiens |
| 1         | alpha-1-B glycoprotein                                                                                                                                                                                                                                                                                                                                                                                                                                             | Homo sapiens |
| 51601     | lipoyltransferase 1                                                                                                                                                                                                                                                                                                                                                                                                                                                | Homo sapiens |
| 9533      | polymerase (RNA) I polypeptide C, 30kDa                                                                                                                                                                                                                                                                                                                                                                                                                            | Homo sapiens |
| 55127     | HEAT repeat containing 1                                                                                                                                                                                                                                                                                                                                                                                                                                           | Homo sapiens |
| 728233    | phosphatidylinositol 4-kinase, catalytic, alpha pseudogene 1                                                                                                                                                                                                                                                                                                                                                                                                       | Homo sapiens |
| 25925     | zinc finger protein 521                                                                                                                                                                                                                                                                                                                                                                                                                                            | Homo sapiens |
| 79609     | chromosome 14 open reading frame 138                                                                                                                                                                                                                                                                                                                                                                                                                               | Homo sapiens |
| 4603      | v-myb myeloblastosis viral oncogene homolog (avian)-like 1                                                                                                                                                                                                                                                                                                                                                                                                         | Homo sapiens |
| 2963      | general transcription factor IIF, polypeptide 2, 30kDa                                                                                                                                                                                                                                                                                                                                                                                                             | Homo sapiens |
| 79582     | sperm associated antigen 16                                                                                                                                                                                                                                                                                                                                                                                                                                        | Homo sapiens |
| 57583     | transmembrane protein 181                                                                                                                                                                                                                                                                                                                                                                                                                                          | Homo sapiens |
| 6643      | sorting nexin 2                                                                                                                                                                                                                                                                                                                                                                                                                                                    | Homo sapiens |
| 166378    | spermatogenesis associated 5                                                                                                                                                                                                                                                                                                                                                                                                                                       | Homo sapiens |
| 10487     | CAP, adenylate cyclase-associated protein 1 (yeast)                                                                                                                                                                                                                                                                                                                                                                                                                | Homo sapiens |
| 6051      | arginyl aminopeptidase (aminopeptidase B)                                                                                                                                                                                                                                                                                                                                                                                                                          | Homo sapiens |
| 84133     | zinc and ring finger 3                                                                                                                                                                                                                                                                                                                                                                                                                                             | Homo sapiens |
| 56267     | cysteine conjugate-beta lyase 2                                                                                                                                                                                                                                                                                                                                                                                                                                    | Homo sapiens |
| 8604      | solute carrier family 25 (mitochondrial carrier, Aralar), member 12                                                                                                                                                                                                                                                                                                                                                                                                | Homo sapiens |
| 3712      | isovaleryl Coenzyme A dehydrogenase                                                                                                                                                                                                                                                                                                                                                                                                                                | Homo sapiens |
| 9200      | protein tyrosine phosphatase-like (proline instead of catalytic arginine), member A                                                                                                                                                                                                                                                                                                                                                                                | Homo sapiens |
| 441024    | methylenetetrahydrofolate dehydrogenase (NADP+ dependent) 2-like                                                                                                                                                                                                                                                                                                                                                                                                   | Homo sapiens |
| 64087     | methylcrotonoyl-Coenzyme A carboxylase 2 (beta)                                                                                                                                                                                                                                                                                                                                                                                                                    | Homo sapiens |
| 10194     | teashirt zinc finger homeobox 1                                                                                                                                                                                                                                                                                                                                                                                                                                    | Homo sapiens |
| 83931     | serine/threonine kinase 40                                                                                                                                                                                                                                                                                                                                                                                                                                         | Homo sapiens |
| 285367    | RNA pseudouridylate synthase domain containing 3                                                                                                                                                                                                                                                                                                                                                                                                                   | Homo sapiens |
| 4839      | NOP2 nucleolar protein homolog (yeast)                                                                                                                                                                                                                                                                                                                                                                                                                             | Homo sapiens |
| 1781      | similar to dynein cytoplasmic 1 intermediate chain 2; dynein, cytoplasmic 1, intermediate chain 2                                                                                                                                                                                                                                                                                                                                                                  | Homo sapiens |
| 11051     | nudix (nucleoside diphosphate linked moiety X)-type motif 21                                                                                                                                                                                                                                                                                                                                                                                                       | Homo sapiens |
| 57216     | vang-like 2 (van gogh, Drosophila)                                                                                                                                                                                                                                                                                                                                                                                                                                 | Homo sapiens |
| 23554     | tetraspanin 12                                                                                                                                                                                                                                                                                                                                                                                                                                                     | Homo sapiens |
| 6793      | serine/threonine kinase 10                                                                                                                                                                                                                                                                                                                                                                                                                                         | Homo sapiens |
| 746       | chromosome 11 open reading frame 10                                                                                                                                                                                                                                                                                                                                                                                                                                | Homo sapiens |
| 5611      | DnaJ (Hsp40) homolog, subfamily C, member 3                                                                                                                                                                                                                                                                                                                                                                                                                        | Homo sapiens |

|           |                                                                                                                                                                                                      |              |
|-----------|------------------------------------------------------------------------------------------------------------------------------------------------------------------------------------------------------|--------------|
| 5774      | protein tyrosine phosphatase, non-receptor type 3                                                                                                                                                    | Homo sapiens |
| 6747      | signal sequence receptor, gamma (translocon-associated protein gamma)                                                                                                                                | Homo sapiens |
| 27315     | post-GPI attachment to proteins 2                                                                                                                                                                    | Homo sapiens |
| 10296     | macrophage erythroblast attacher                                                                                                                                                                     | Homo sapiens |
| 201973    | coiled-coil domain containing 111                                                                                                                                                                    | Homo sapiens |
| 120534    | chromosome 11 open reading frame 46                                                                                                                                                                  | Homo sapiens |
| 54453     | Ras and Rab interactor 2                                                                                                                                                                             | Homo sapiens |
| 56995     | tubby like protein 4                                                                                                                                                                                 | Homo sapiens |
| 55353     | lysosomal protein transmembrane 4 beta                                                                                                                                                               | Homo sapiens |
| 8874      | Rho guanine nucleotide exchange factor (GEF) 7                                                                                                                                                       | Homo sapiens |
| 5756      | twinfilin, actin-binding protein, homolog 1 (Drosophila)                                                                                                                                             | Homo sapiens |
| 2787      | guanine nucleotide binding protein (G protein), gamma 5                                                                                                                                              | Homo sapiens |
| 23014     | F-box protein 21                                                                                                                                                                                     | Homo sapiens |
| 5684      | proteasome (prosome, macropain) subunit, alpha type, 3                                                                                                                                               | Homo sapiens |
| 5784      | protein tyrosine phosphatase, non-receptor type 14                                                                                                                                                   | Homo sapiens |
| 23365     | Rho guanine nucleotide exchange factor (GEF) 12                                                                                                                                                      | Homo sapiens |
| 51542     | vacuolar protein sorting 54 homolog (S. cerevisiae)                                                                                                                                                  | Homo sapiens |
| 5929      | retinoblastoma binding protein 5                                                                                                                                                                     | Homo sapiens |
| 5621      | prion protein                                                                                                                                                                                        | Homo sapiens |
| 9673      | solute carrier family 25, member 44                                                                                                                                                                  | Homo sapiens |
| 58486     | zinc finger, BED-type containing 5                                                                                                                                                                   | Homo sapiens |
| 6205      | ribosomal protein S11 pseudogene 5; ribosomal protein S11                                                                                                                                            | Homo sapiens |
| 56889     | transmembrane 9 superfamily member 3                                                                                                                                                                 | Homo sapiens |
| 145270    | proline rich membrane anchor 1                                                                                                                                                                       | Homo sapiens |
| 54904     | Wolf-Hirschhorn syndrome candidate 1-like 1                                                                                                                                                          | Homo sapiens |
| 6167      | ribosomal protein L37                                                                                                                                                                                | Homo sapiens |
| 51631     | LUC7-like 2 (S. cerevisiae)                                                                                                                                                                          | Homo sapiens |
| 130916    | MTERF domain containing 2                                                                                                                                                                            | Homo sapiens |
| 653308    | N-acylsphingosine amidohydrolase (non-lysosomal ceramidase) 2B                                                                                                                                       | Homo sapiens |
| 10906     | TRAF-type zinc finger domain containing 1                                                                                                                                                            | Homo sapiens |
| 26750     | ribosomal protein S6 kinase, 52kDa, polypeptide 1                                                                                                                                                    | Homo sapiens |
| 56270     | WDR45-like                                                                                                                                                                                           | Homo sapiens |
| 352909    | chromosome 19 open reading frame 51                                                                                                                                                                  | Homo sapiens |
| 7266      | DnaJ (Hsp40) homolog, subfamily C, member 7                                                                                                                                                          | Homo sapiens |
| 5217      | profilin 2                                                                                                                                                                                           | Homo sapiens |
| 5324      | pleiomorphic adenoma gene 1                                                                                                                                                                          | Homo sapiens |
| 100287015 | hypothetical protein LOC100287015                                                                                                                                                                    | Homo sapiens |
| 7071      | Kruppel-like factor 10                                                                                                                                                                               | Homo sapiens |
| 23008     | kelch domain containing 10                                                                                                                                                                           | Homo sapiens |
| 6218      | ribosomal protein S17                                                                                                                                                                                | Homo sapiens |
| 2483      | FSHD region gene 1                                                                                                                                                                                   | Homo sapiens |
| 865       | core-binding factor, beta subunit                                                                                                                                                                    | Homo sapiens |
| 7531      | similar to 14-3-3 protein epsilon (14-3-3E) (Mitochondrial import stimulation factor L subunit) (MSF L); tyrosine 3-monooxygenase/tryptophan 5-monooxygenase activation protein, epsilon polypeptide | Homo sapiens |
| 5588      | protein kinase C, theta                                                                                                                                                                              | Homo sapiens |
| 788       | solute carrier family 25 (carnitine/acylcarnitine translocase), member 20                                                                                                                            | Homo sapiens |
| 65991     | FUN14 domain containing 2                                                                                                                                                                            | Homo sapiens |
| 8073      | protein tyrosine phosphatase type IVA, member 2                                                                                                                                                      | Homo sapiens |
| 1718      | 24-dehydrocholesterol reductase                                                                                                                                                                      | Homo sapiens |
| 6996      | similar to G/T mismatch-specific thymine DNA glycosylase; thymine-DNA glycosylase                                                                                                                    | Homo sapiens |
| 3251      | hypoxanthine phosphoribosyltransferase 1                                                                                                                                                             | Homo sapiens |
| 64943     | 5'-nucleotidase domain containing 2                                                                                                                                                                  | Homo sapiens |
| 10273     | STIP1 homology and U-box containing protein 1                                                                                                                                                        | Homo sapiens |
| 2040      | stomatin                                                                                                                                                                                             | Homo sapiens |
| 9125      | RCD1 required for cell differentiation1 homolog (S. pombe)                                                                                                                                           | Homo sapiens |
| 51277     | DnaJ (Hsp40) homolog, subfamily C, member 27                                                                                                                                                         | Homo sapiens |
| 1825      | desmocollin 3                                                                                                                                                                                        | Homo sapiens |
| 339344    | Myb-related transcription factor, partner of profilin                                                                                                                                                | Homo sapiens |
| 93594     | WD repeat domain 67                                                                                                                                                                                  | Homo sapiens |
| 159013    | chromosome X open reading frame 38                                                                                                                                                                   | Homo sapiens |
| 55796     | muscleblind-like 3 (Drosophila)                                                                                                                                                                      | Homo sapiens |
| 27183     | vacuolar protein sorting 4 homolog A (S. cerevisiae)                                                                                                                                                 | Homo sapiens |
| 6836      | surfeit 4                                                                                                                                                                                            | Homo sapiens |
| 55638     | Golgi-localized protein                                                                                                                                                                              | Homo sapiens |
| 5050      | platelet-activating factor acetylhydrolase, isoform Ib, subunit 3 (29kDa)                                                                                                                            | Homo sapiens |
| 55819     | ring finger protein 130                                                                                                                                                                              | Homo sapiens |
| 100294402 | similar to single Ig IL-1R-related molecule                                                                                                                                                          | Homo sapiens |
| 2070      | eyes absent homolog 4 (Drosophila)                                                                                                                                                                   | Homo sapiens |
| 10213     | proteasome (prosome, macropain) 26S subunit, non-ATPase, 14                                                                                                                                          | Homo sapiens |
| 23048     | formin binding protein 1                                                                                                                                                                             | Homo sapiens |
| 100131017 | zinc finger protein 316                                                                                                                                                                              | Homo sapiens |
| 146057    | tau tubulin kinase 2                                                                                                                                                                                 | Homo sapiens |
| 5062      | p21 protein (Cdc42/Rac)-activated kinase 2                                                                                                                                                           | Homo sapiens |
| 94239     | H2A histone family, member V                                                                                                                                                                         | Homo sapiens |
| 9217      | VAMP (vesicle-associated membrane protein)-associated protein B and C                                                                                                                                | Homo sapiens |
| 7372      | uridine monophosphate synthetase                                                                                                                                                                     | Homo sapiens |

|           |                                                                                                         |              |
|-----------|---------------------------------------------------------------------------------------------------------|--------------|
| 9827      | RGPI retrograde golgi transport homolog ( <i>S. cerevisiae</i> )                                        | Homo sapiens |
| 10717     | adaptor-related protein complex 4, beta 1 subunit                                                       | Homo sapiens |
| 27248     | chromosome 2 open reading frame 30                                                                      | Homo sapiens |
| 7360      | UDP-glucose pyrophosphorylase 2                                                                         | Homo sapiens |
| 57532     | nuclear fragile X mental retardation protein interacting protein 2                                      | Homo sapiens |
| 131583    | family with sequence similarity 43, member A                                                            | Homo sapiens |
| 25917     | THUMP domain containing 3                                                                               | Homo sapiens |
| 55703     | polymerase (RNA) III (DNA directed) polypeptide B                                                       | Homo sapiens |
| 51808     | phosphorylated adaptor for RNA export                                                                   | Homo sapiens |
| 1316      | Kruppel-like factor 6                                                                                   | Homo sapiens |
| 55011     | PIH1 domain containing 1                                                                                | Homo sapiens |
| 6491      | SCL/TAL1 interrupting locus                                                                             | Homo sapiens |
| 114049    | Williams Beuren syndrome chromosome region 22                                                           | Homo sapiens |
| 9943      | oxidative-stress responsive 1                                                                           | Homo sapiens |
| 100288693 | hypothetical protein LOC100288693                                                                       | Homo sapiens |
| 6001      | regulator of G-protein signaling 10                                                                     | Homo sapiens |
| 2971      | general transcription factor IIIA                                                                       | Homo sapiens |
| 51274     | Kruppel-like factor 3 (basic)                                                                           | Homo sapiens |
| 9521      | eukaryotic translation elongation factor 1 epsilon 1                                                    | Homo sapiens |
| 219771    | cyclin Y                                                                                                | Homo sapiens |
| 2314      | flightless I homolog ( <i>Drosophila</i> )                                                              | Homo sapiens |
| 100093630 | small nucleolar RNA host gene 8 (non-protein coding)                                                    | Homo sapiens |
| 29923     | chromosome 7 open reading frame 68                                                                      | Homo sapiens |
| 10210     | topoisomerase I binding, arginine/serine-rich                                                           | Homo sapiens |
| 4636      | myosin, light chain 5, regulatory                                                                       | Homo sapiens |
| 7168      | tropomyosin 1 (alpha)                                                                                   | Homo sapiens |
| 10694     | similar to chaperonin containing TCP1, subunit 8 (theta); chaperonin containing TCP1, subunit 8 (theta) | Homo sapiens |
| 10713     | ubiquitin specific peptidase 39                                                                         | Homo sapiens |
| 100131801 | similar to hCG2036585                                                                                   | Homo sapiens |
| 79022     | transmembrane protein 106C                                                                              | Homo sapiens |
| 155400    | NOL1/NOP2/Sun domain family, member 5B                                                                  | Homo sapiens |
| 9918      | non-SMC condensin I complex, subunit D2                                                                 | Homo sapiens |
| 25871     | chromosome 3 open reading frame 17                                                                      | Homo sapiens |
| 55737     | hypothetical protein LOC100133770; vacuolar protein sorting 35 homolog ( <i>S. cerevisiae</i> )         | Homo sapiens |
| 221302    | zinc finger with UFMI-specific peptidase domain                                                         | Homo sapiens |
| 64864     | regulatory factor X, 7                                                                                  | Homo sapiens |
| 5431      | polymerase (RNA) II (DNA directed) polypeptide B, 140kDa                                                | Homo sapiens |
| 1632      | dodecenoyl-Coenzyme A delta isomerase (3,2 trans-enoyl-Coenzyme A isomerase)                            | Homo sapiens |
| 439921    | matrix-remodelling associated 7                                                                         | Homo sapiens |
| 7316      | ubiquitin C                                                                                             | Homo sapiens |
| 116068    | LysM, putative peptidoglycan-binding, domain containing 3                                               | Homo sapiens |
| 25825     | beta-site APP-cleaving enzyme 2                                                                         | Homo sapiens |
| 157       | adrenergic, beta, receptor kinase 2                                                                     | Homo sapiens |
| 28996     | homeodomain interacting protein kinase 2; similar to homeodomain interacting protein kinase 2           | Homo sapiens |
| 7695      | zinc finger protein 136                                                                                 | Homo sapiens |
| 79657     | RNA polymerase II associated protein 3                                                                  | Homo sapiens |
| 54855     | family with sequence similarity 46, member C                                                            | Homo sapiens |
| 8458      | transcription termination factor, RNA polymerase II                                                     | Homo sapiens |
| 64208     | popeye domain containing 3                                                                              | Homo sapiens |
| 10807     | serologically defined colon cancer antigen 3; similar to Serologically defined colon cancer antigen 3   | Homo sapiens |
| 4700      | NADH dehydrogenase (ubiquinone) 1 alpha subcomplex, 6, 14kDa                                            | Homo sapiens |
| 6405      | sema domain, immunoglobulin domain (Ig), short basic domain, secreted, (semaphorin) 3F                  | Homo sapiens |
| 440253    | WAS protein homolog associated with actin, golgi membranes and microtubules-like 2 (pseudogene)         | Homo sapiens |
| 334       | amyloid beta (A4) precursor-like protein 2                                                              | Homo sapiens |
| 10901     | dehydrogenase/reductase (SDR family) member 4                                                           | Homo sapiens |
| 645745    | metallothionein 1 pseudogene 2                                                                          | Homo sapiens |
| 3987      | LIM and senescent cell antigen-like domains 1                                                           | Homo sapiens |
| 150776    | sphingomyelin phosphodiesterase 4, neutral membrane pseudogene                                          | Homo sapiens |
| 9240      | paraneoplastic antigen MA1                                                                              | Homo sapiens |
| 153527    | zinc finger, matrin type 2                                                                              | Homo sapiens |
| 8834      | transmembrane protein 11                                                                                | Homo sapiens |
| 64332     | nuclear factor of kappa light polypeptide gene enhancer in B-cells inhibitor, zeta                      | Homo sapiens |
| 57110     | HRAS-like suppressor                                                                                    | Homo sapiens |
| 55251     | protein-L-isoaspartate (D-aspartate) O-methyltransferase domain containing 2                            | Homo sapiens |
| 9990      | solute carrier family 12 (potassium/chloride transporters), member 6                                    | Homo sapiens |
| 5499      | protein phosphatase 1, catalytic subunit, alpha isoform                                                 | Homo sapiens |
| 90293     | kelch-like 13 ( <i>Drosophila</i> )                                                                     | Homo sapiens |
| 10682     | emopamil binding protein (sterol isomerase)                                                             | Homo sapiens |
| 10327     | aldo-keto reductase family 1, member A1 (aldehyde reductase)                                            | Homo sapiens |
| 5143      | phosphodiesterase 4C, cAMP-specific (phosphodiesterase E1 dunce homolog, <i>Drosophila</i> )            | Homo sapiens |
| 1329      | cytochrome c oxidase subunit Vb                                                                         | Homo sapiens |
| 8148      | TAF15 RNA polymerase II, TATA box binding protein (TBP)-associated factor, 68kDa                        | Homo sapiens |
| 1737      | dihydrolipoamide S-acetyltransferase                                                                    | Homo sapiens |



|           |                                                                                           |              |
|-----------|-------------------------------------------------------------------------------------------|--------------|
| 51068     | NMD3 homolog ( <i>S. cerevisiae</i> )                                                     | Homo sapiens |
| 51028     | vacuolar protein sorting 36 homolog ( <i>S. cerevisiae</i> )                              | Homo sapiens |
| 256987    | serine incorporator 5                                                                     | Homo sapiens |
| 51164     | dynactin 4 (p62)                                                                          | Homo sapiens |
| 57099     | apoptosis, caspase activation inhibitor                                                   | Homo sapiens |
| 26084     | Src homology 3 domain-containing guanine nucleotide exchange factor                       | Homo sapiens |
| 51013     | exosome component 1                                                                       | Homo sapiens |
| 85465     | selenoprotein I                                                                           | Homo sapiens |
| 388962    | similar to bolA-like 3; bolA homolog 3 ( <i>E. coli</i> )                                 | Homo sapiens |
| 54344     | dolichyl-phosphate mannosyltransferase polypeptide 3                                      | Homo sapiens |
| 5820      | Pvt1 oncogene (non-protein coding)                                                        | Homo sapiens |
| 64766     | S100P binding protein                                                                     | Homo sapiens |
| 26574     | apoptosis antagonizing transcription factor                                               | Homo sapiens |
| 55726     | chromosome 12 open reading frame 11                                                       | Homo sapiens |
| 60496     | aminoadipate-semialdehyde dehydrogenase-phosphopantetheinyl transferase                   | Homo sapiens |
| 9648      | GRIP and coiled-coil domain containing 2                                                  | Homo sapiens |
| 51701     | nemo-like kinase                                                                          | Homo sapiens |
| 2648      | K(lysine) acetyltransferase 2A                                                            | Homo sapiens |
| 79571     | GRIP and coiled-coil domain containing 1                                                  | Homo sapiens |
| 9221      | nucleolar and coiled-body phosphoprotein 1                                                | Homo sapiens |
| 10971     | tyrosine 3-monooxygenase/tryptophan 5-monooxygenase activation protein, theta polypeptide | Homo sapiens |
| 57494     | ribosomal modification protein rimK-like family member B                                  | Homo sapiens |
| 162427    | family with sequence similarity 134, member C                                             | Homo sapiens |
| 25782     | RAB3 GTPase activating protein subunit 2 (non-catalytic)                                  | Homo sapiens |
| 151188    | ADP-ribosylation-like factor 6 interacting protein 6                                      | Homo sapiens |
| 23245     | astrotactin 2                                                                             | Homo sapiens |
| 402       | ADP-ribosylation factor-like 2                                                            | Homo sapiens |
| 10024     | trophinin associated protein (tastin)                                                     | Homo sapiens |
| 9306      | suppressor of cytokine signaling 6                                                        | Homo sapiens |
| 285074    | anaphase promoting complex subunit 1 pseudogene                                           | Homo sapiens |
| 51236     | chromosome 8 open reading frame 30A                                                       | Homo sapiens |
| 51501     | chromosome 11 open reading frame 73                                                       | Homo sapiens |
| 80148     | PQ loop repeat containing 1                                                               | Homo sapiens |
| 201626    | phosphodiesterase 12                                                                      | Homo sapiens |
| 9517      | serine palmitoyltransferase, long chain base subunit 2                                    | Homo sapiens |
| 2195      | FAT tumor suppressor homolog 1 ( <i>Drosophila</i> )                                      | Homo sapiens |
| 164832    | LON peptidase N-terminal domain and ring finger 2                                         | Homo sapiens |
| 59342     | serine carboxypeptidase 1                                                                 | Homo sapiens |
| 10675     | chondroitin sulfate proteoglycan 5 (neuroglycan C)                                        | Homo sapiens |
| 55852     | testis expressed 2                                                                        | Homo sapiens |
| 10978     | CLPL, cleavage and polyadenylation factor I subunit, homolog ( <i>S. cerevisiae</i> )     | Homo sapiens |
| 2526      | fucosyltransferase 4 (alpha (1,3) fucosyltransferase, myeloid-specific)                   | Homo sapiens |
| 23401     | frequently rearranged in advanced T-cell lymphomas 2                                      | Homo sapiens |
| 25797     | glutaminyl-peptide cyclotransferase                                                       | Homo sapiens |
| 2965      | general transcription factor IIH, polypeptide 1, 62kDa                                    | Homo sapiens |
| 79142     | PHD finger protein 23                                                                     | Homo sapiens |
| 23582     | cyclin D-type binding-protein 1                                                           | Homo sapiens |
| 1491      | cystathionase (cystathionine gamma-lyase)                                                 | Homo sapiens |
| 140459    | ankyrin repeat and SOCS box-containing 6                                                  | Homo sapiens |
| 51256     | TBC1 domain family, member 7                                                              | Homo sapiens |
| 127703    | chromosome 1 open reading frame 216                                                       | Homo sapiens |
| 166968    | mesoderm induction early response 1, family member 3                                      | Homo sapiens |
| 57048     | phospholipid scramblase 3                                                                 | Homo sapiens |
| 83892     | potassium channel tetramerisation domain containing 10                                    | Homo sapiens |
| 51586     | mediator complex subunit 15                                                               | Homo sapiens |
| 150223    | YdjC homolog (bacterial)                                                                  | Homo sapiens |
| 92344     | golgin, RAB6-interacting                                                                  | Homo sapiens |
| 54517     | pseudouridylylase synthase 7 homolog ( <i>S. cerevisiae</i> )                             | Homo sapiens |
| 4354      | membrane protein, palmitoylated 1, 55kDa                                                  | Homo sapiens |
| 100129792 | coiled-coil domain containing 152                                                         | Homo sapiens |
| 10544     | protein C receptor, endothelial (EPCR)                                                    | Homo sapiens |
| 10142     | A kinase (PRKA) anchor protein (yotiao) 9                                                 | Homo sapiens |
| 9019      | myelin protein zero-like 1                                                                | Homo sapiens |
| 55847     | CDGSH iron sulfur domain 1                                                                | Homo sapiens |
| 51184     | GPN-loop GTPase 3                                                                         | Homo sapiens |
| 112970    | KTI12 homolog, chromatin associated ( <i>S. cerevisiae</i> )                              | Homo sapiens |
| 51097     | saccharopine dehydrogenase (putative)                                                     | Homo sapiens |
| 5546      | papillary renal cell carcinoma (translocation-associated)                                 | Homo sapiens |
| 85461     | tetratricopeptide repeat, ankyrin repeat and coiled-coil containing 1                     | Homo sapiens |
| 91661     | zinc finger protein 765                                                                   | Homo sapiens |
| 149603    | ring finger protein 187                                                                   | Homo sapiens |
| 127933    | U2AF homology motif (UHM) kinase 1                                                        | Homo sapiens |
| 5792      | protein tyrosine phosphatase, receptor type, F                                            | Homo sapiens |
| 8723      | sorting nexin 4                                                                           | Homo sapiens |
| 10726     | nuclear distribution gene C homolog ( <i>A. nidulans</i> )                                | Homo sapiens |
| 4811      | nidogen 1                                                                                 | Homo sapiens |

|           |                                                                                                                                                                                                                                   |              |
|-----------|-----------------------------------------------------------------------------------------------------------------------------------------------------------------------------------------------------------------------------------|--------------|
| 1207      | chloride channel, nucleotide-sensitive, 1A                                                                                                                                                                                        | Homo sapiens |
| 11149     | blood vessel epicardial substance                                                                                                                                                                                                 | Homo sapiens |
| 9768      | KIAA0101                                                                                                                                                                                                                          | Homo sapiens |
| 90736     | family with sequence similarity 104, member B                                                                                                                                                                                     | Homo sapiens |
| 80012     | polyhomeotic homolog 3 (Drosophila)                                                                                                                                                                                               | Homo sapiens |
| 51773     | remodeling and spacing factor 1                                                                                                                                                                                                   | Homo sapiens |
| 10892     | mucosa associated lymphoid tissue lymphoma translocation gene 1                                                                                                                                                                   | Homo sapiens |
| 113419    | testis expressed 261                                                                                                                                                                                                              | Homo sapiens |
| 151246    | shugoshin-like 2 (S. pombe)                                                                                                                                                                                                       | Homo sapiens |
| 27018     | nerve growth factor receptor (TNFRSF16) associated protein 1                                                                                                                                                                      | Homo sapiens |
| 7873      | mesencephalic astrocyte-derived neurotrophic factor                                                                                                                                                                               | Homo sapiens |
| 8824      | carboxylesterase 2 (intestine, liver)                                                                                                                                                                                             | Homo sapiens |
| 115509    | zinc finger protein 689                                                                                                                                                                                                           | Homo sapiens |
| 54765     | tripartite motif-containing 44                                                                                                                                                                                                    | Homo sapiens |
| 94104     | chromosome 21 open reading frame 66                                                                                                                                                                                               | Homo sapiens |
| 56888     | potassium channel modulatory factor 1                                                                                                                                                                                             | Homo sapiens |
| 51605     | tRNA methyltransferase 6 homolog (S. cerevisiae)                                                                                                                                                                                  | Homo sapiens |
| 6497      | v-ski sarcoma viral oncogene homolog (avian)                                                                                                                                                                                      | Homo sapiens |
| 7690      | zinc finger protein 131                                                                                                                                                                                                           | Homo sapiens |
| 10419     | protein arginine methyltransferase 5                                                                                                                                                                                              | Homo sapiens |
| 22931     | RAB18, member RAS oncogene family                                                                                                                                                                                                 | Homo sapiens |
| 84992     | phosphatidylinositol glycan anchor biosynthesis, class Y                                                                                                                                                                          | Homo sapiens |
| 54535     | coiled-coil alpha-helical rod protein 1                                                                                                                                                                                           | Homo sapiens |
| 9655      | suppressor of cytokine signaling 5                                                                                                                                                                                                | Homo sapiens |
| 10472     | zinc finger protein 238                                                                                                                                                                                                           | Homo sapiens |
| 533       | ATPase, H <sup>+</sup> transporting, lysosomal 21kDa, V0 subunit b                                                                                                                                                                | Homo sapiens |
| 66036     | myotubularin related protein 9                                                                                                                                                                                                    | Homo sapiens |
| 2033      | E1A binding protein p300                                                                                                                                                                                                          | Homo sapiens |
| 64745     | methyltransferase 11 domain containing 1; similar to methyltransferase 11 domain containing 1 isoform 2                                                                                                                           | Homo sapiens |
| 10284     | Sin3A-associated protein, 18kDa                                                                                                                                                                                                   | Homo sapiens |
| 6787      | NIMA (never in mitosis gene a)-related kinase 4                                                                                                                                                                                   | Homo sapiens |
| 283768    | golgi autoantigen, golgin subfamily a, 8D; golgi autoantigen, golgin subfamily a, 8C; similar to Golgin subfamily A member 8-like protein 1; golgi autoantigen, golgin subfamily a, 8F; golgi autoantigen, golgin subfamily a, 8G | Homo sapiens |
| 729786    | golgi autoantigen, golgin subfamily a, 8D; golgi autoantigen, golgin subfamily a, 8C; similar to Golgin subfamily A member 8-like protein 1; golgi autoantigen, golgin subfamily a, 8F; golgi autoantigen, golgin subfamily a, 8G | Homo sapiens |
| 100132979 | golgi autoantigen, golgin subfamily a, 8D; golgi autoantigen, golgin subfamily a, 8C; similar to Golgin subfamily A member 8-like protein 1; golgi autoantigen, golgin subfamily a, 8F; golgi autoantigen, golgin subfamily a, 8G | Homo sapiens |
| 23059     | clusterin associated protein 1                                                                                                                                                                                                    | Homo sapiens |
| 10640     | exocyst complex component 5                                                                                                                                                                                                       | Homo sapiens |
| 29099     | COMM domain containing 9                                                                                                                                                                                                          | Homo sapiens |
| 3177      | solute carrier family 29 (nucleoside transporters), member 2                                                                                                                                                                      | Homo sapiens |
| 10512     | sema domain, immunoglobulin domain (Ig), short basic domain, secreted, (semaphorin) 3C                                                                                                                                            | Homo sapiens |
| 5933      | retinoblastoma-like 1 (p107)                                                                                                                                                                                                      | Homo sapiens |
| 152485    | zinc finger protein 827                                                                                                                                                                                                           | Homo sapiens |
| 26035     | glucuronic acid epimerase                                                                                                                                                                                                         | Homo sapiens |
| 4675      | nucleosome assembly protein 1-like 3                                                                                                                                                                                              | Homo sapiens |
| 91875     | tetratricopeptide repeat domain 5                                                                                                                                                                                                 | Homo sapiens |
| 124044    | spermatogenesis associated 2-like                                                                                                                                                                                                 | Homo sapiens |
| 729810    | hypothetical protein LOC729810                                                                                                                                                                                                    | Homo sapiens |
| 23414     | zinc finger protein, multitype 2                                                                                                                                                                                                  | Homo sapiens |
| 285598    | ADP-ribosylation factor-like 10                                                                                                                                                                                                   | Homo sapiens |
| 1122      | choroideremia-like (Rab escort protein 2)                                                                                                                                                                                         | Homo sapiens |
| 91419     | XRCC6 binding protein 1                                                                                                                                                                                                           | Homo sapiens |
| 10459     | MAD2 mitotic arrest deficient-like 2 (yeast)                                                                                                                                                                                      | Homo sapiens |
| 10949     | heterogeneous nuclear ribonucleoprotein A0                                                                                                                                                                                        | Homo sapiens |
| 4753      | NEL-like 2 (chicken)                                                                                                                                                                                                              | Homo sapiens |
| 65003     | mitochondrial ribosomal protein L11                                                                                                                                                                                               | Homo sapiens |
| 9709      | homocysteine-inducible, endoplasmic reticulum stress-inducible, ubiquitin-like domain member 1                                                                                                                                    | Homo sapiens |
| 57405     | SPC25, NDC80 kinetochore complex component, homolog (S. cerevisiae)                                                                                                                                                               | Homo sapiens |
| 6868      | ADAM metallopeptidase domain 17                                                                                                                                                                                                   | Homo sapiens |
| 5253      | PHD finger protein 2                                                                                                                                                                                                              | Homo sapiens |
| 37        | acyl-Coenzyme A dehydrogenase, very long chain                                                                                                                                                                                    | Homo sapiens |
| 81610     | family with sequence similarity 83, member D                                                                                                                                                                                      | Homo sapiens |
| 64928     | mitochondrial ribosomal protein L14                                                                                                                                                                                               | Homo sapiens |
| 2553      | GA binding protein transcription factor, beta subunit 1                                                                                                                                                                           | Homo sapiens |
| 25959     | KN motif and ankyrin repeat domains 2                                                                                                                                                                                             | Homo sapiens |
| 90407     | transmembrane protein 41A                                                                                                                                                                                                         | Homo sapiens |
| 529       | ATPase, H <sup>+</sup> transporting, lysosomal 31kDa, V1 subunit E1                                                                                                                                                               | Homo sapiens |
| 757       | transmembrane protein 50B                                                                                                                                                                                                         | Homo sapiens |
| 29798     | hypothetical LOC642669; chromosome 2 open reading frame 27A; hypothetical LOC644525                                                                                                                                               | Homo sapiens |
| 55622     | tetratricopeptide repeat domain 27                                                                                                                                                                                                | Homo sapiens |
| 55145     | THAP domain containing, apoptosis associated protein 1                                                                                                                                                                            | Homo sapiens |

|        |                                                                                                                                     |              |
|--------|-------------------------------------------------------------------------------------------------------------------------------------|--------------|
| 2043   | EPH receptor A4                                                                                                                     | Homo sapiens |
| 8702   | UDP-Gal:betaGlcNAc beta 1,4- galactosyltransferase, polypeptide 4                                                                   | Homo sapiens |
| 283373 | ankyrin repeat domain 52                                                                                                            | Homo sapiens |
| 3419   | isocitrate dehydrogenase 3 (NAD+) alpha                                                                                             | Homo sapiens |
| 206358 | solute carrier family 36 (proton/amino acid symporter), member 1                                                                    | Homo sapiens |
| 55039  | tRNA methyltransferase 12 homolog (S. cerevisiae)                                                                                   | Homo sapiens |
| 285237 | chromosome 3 open reading frame 38                                                                                                  | Homo sapiens |
| 9637   | fasciculation and elongation protein zeta 2 (zygin II)                                                                              | Homo sapiens |
| 10728  | prostaglandin E synthase 3 (cytosolic)                                                                                              | Homo sapiens |
| 200734 | sprouty-related, EVH1 domain containing 2                                                                                           | Homo sapiens |
| 27336  | HIV-1 Tat specific factor 1                                                                                                         | Homo sapiens |
| 200728 | transmembrane protein 17                                                                                                            | Homo sapiens |
| 4594   | methylmalonyl Coenzyme A mutase                                                                                                     | Homo sapiens |
| 56894  | 1-acylglycerol-3-phosphate O-acyltransferase 3                                                                                      | Homo sapiens |
| 84280  | BTB (POZ) domain containing 10                                                                                                      | Homo sapiens |
| 6837   | mediator complex subunit 22                                                                                                         | Homo sapiens |
| 286205 | chromosome 9 open reading frame 126                                                                                                 | Homo sapiens |
| 22794  | cancer susceptibility candidate 3                                                                                                   | Homo sapiens |
| 143384 | chromosome 10 open reading frame 46                                                                                                 | Homo sapiens |
| 643837 | hypothetical LOC643837                                                                                                              | Homo sapiens |
| 55128  | tripartite motif-containing 68                                                                                                      | Homo sapiens |
| 7515   | X-ray repair complementing defective repair in Chinese hamster cells 1                                                              | Homo sapiens |
| 64759  | tensin 3                                                                                                                            | Homo sapiens |
| 4301   | similar to Afadin (Protein AF-6); myeloid/lymphoid or mixed-lineage leukemia (trithorax homolog, Drosophila); translocated to, 4    | Homo sapiens |
| 6164   | ribosomal protein L34                                                                                                               | Homo sapiens |
| 51490  | chromosome 9 open reading frame 114                                                                                                 | Homo sapiens |
| 3953   | leptin receptor                                                                                                                     | Homo sapiens |
| 64412  | GDNF-inducible zinc finger protein 1                                                                                                | Homo sapiens |
| 134728 | interleukin-1 receptor-associated kinase 1 binding protein 1                                                                        | Homo sapiens |
| 284702 | chromosome 1 open reading frame 199                                                                                                 | Homo sapiens |
| 6666   | SRY (sex determining region Y)-box 12                                                                                               | Homo sapiens |
| 220972 | membrane-associated ring finger (C3HC4) 8                                                                                           | Homo sapiens |
| 1983   | eukaryotic translation initiation factor 5                                                                                          | Homo sapiens |
| 55957  | lin-37 homolog (C. elegans)                                                                                                         | Homo sapiens |
| 5524   | protein phosphatase 2A activator, regulatory subunit 4                                                                              | Homo sapiens |
| 10436  | EMG1 nucleolar protein homolog (S. cerevisiae)                                                                                      | Homo sapiens |
| 23513  | scribbled homolog (Drosophila)                                                                                                      | Homo sapiens |
| 79443  | FYVE and coiled-coil domain containing 1                                                                                            | Homo sapiens |
| 267    | autocrine motility factor receptor                                                                                                  | Homo sapiens |
| 27086  | forkhead box P1                                                                                                                     | Homo sapiens |
| 653464 | SLIT-ROBO Rho GTPase activating protein 2 pseudogene 1                                                                              | Homo sapiens |
| 59274  | mesoderm development candidate 1                                                                                                    | Homo sapiens |
| 55066  | pyruvate dehydrogenase phosphatase regulatory subunit                                                                               | Homo sapiens |
| 9771   | Rap guanine nucleotide exchange factor (GEF) 5                                                                                      | Homo sapiens |
| 11167  | follistatin-like 1                                                                                                                  | Homo sapiens |
| 55870  | ash1 (absent, small, or homeotic)-like (Drosophila)                                                                                 | Homo sapiens |
| 80254  | centrosomal protein 63kDa                                                                                                           | Homo sapiens |
| 116138 | kelch domain containing 3                                                                                                           | Homo sapiens |
| 79660  | protein phosphatase 1, regulatory (inhibitor) subunit 3B                                                                            | Homo sapiens |
| 57698  | KIAA1598                                                                                                                            | Homo sapiens |
| 830    | capping protein (actin filament) muscle Z-line, alpha 2                                                                             | Homo sapiens |
| 26521  | similar to translocase of inner mitochondrial membrane 8 homolog B; translocase of inner mitochondrial membrane 8 homolog B (yeast) | Homo sapiens |
| 7275   | tubby homolog (mouse)                                                                                                               | Homo sapiens |
| 3631   | inositol polyphosphate-4-phosphatase, type I, 107kDa                                                                                | Homo sapiens |
| 51167  | cytochrome b5 reductase 4                                                                                                           | Homo sapiens |
| 5906   | RAP1A, member of RAS oncogene family                                                                                                | Homo sapiens |
| 51250  | chromosome 6 open reading frame 203                                                                                                 | Homo sapiens |
| 92181  | ubiquitin domain containing 2                                                                                                       | Homo sapiens |
| 22982  | DIP2 disco-interacting protein 2 homolog C (Drosophila)                                                                             | Homo sapiens |
| 27342  | RAB guanine nucleotide exchange factor (GEF) 1                                                                                      | Homo sapiens |
| 85315  | progesterone and adipoQ receptor family member VIII                                                                                 | Homo sapiens |
| 231    | aldo-keto reductase family 1, member B1 (aldose reductase)                                                                          | Homo sapiens |
| 54495  | thioredoxin-related transmembrane protein 3                                                                                         | Homo sapiens |
| 10152  | abl interactor 2                                                                                                                    | Homo sapiens |
| 23397  | non-SMC condensin I complex, subunit H                                                                                              | Homo sapiens |
| 7707   | zinc finger protein 148                                                                                                             | Homo sapiens |
| 92912  | ubiquitin-conjugating enzyme E2Q family member 2                                                                                    | Homo sapiens |
| 643988 | hypothetical LOC643988                                                                                                              | Homo sapiens |
| 115196 | zinc finger protein 554                                                                                                             | Homo sapiens |
| 56890  | Mdm1 nuclear protein homolog (mouse)                                                                                                | Homo sapiens |
| 11257  | TP53 target 1 (non-protein coding)                                                                                                  | Homo sapiens |
| 78994  | proline rich 14                                                                                                                     | Homo sapiens |
| 53339  | BTB (POZ) domain containing 1                                                                                                       | Homo sapiens |
| 7993   | UBX domain protein 8                                                                                                                | Homo sapiens |
| 6143   | ribosomal protein L19; ribosomal protein L19 pseudogene 12                                                                          | Homo sapiens |

|           |                                                                                                                                                                                                                                     |              |
|-----------|-------------------------------------------------------------------------------------------------------------------------------------------------------------------------------------------------------------------------------------|--------------|
| 79733     | E2F transcription factor 8                                                                                                                                                                                                          | Homo sapiens |
| 23042     | pyridoxal-dependent decarboxylase domain containing 1                                                                                                                                                                               | Homo sapiens |
| 6202      | ribosomal protein S8; ribosomal protein S8 pseudogene 8; ribosomal protein S8 pseudogene 10                                                                                                                                         | Homo sapiens |
| 64795     | required for meiotic nuclear division 5 homolog A ( <i>S. cerevisiae</i> )                                                                                                                                                          | Homo sapiens |
| 51642     | mitochondrial ribosomal protein L48                                                                                                                                                                                                 | Homo sapiens |
| 10513     | amyloid beta precursor protein (cytoplasmic tail) binding protein 2                                                                                                                                                                 | Homo sapiens |
| 1153      | cold inducible RNA binding protein                                                                                                                                                                                                  | Homo sapiens |
| 54107     | polymerase (DNA directed), epsilon 3 (p17 subunit)                                                                                                                                                                                  | Homo sapiens |
| 79072     | FAST kinase domains 3                                                                                                                                                                                                               | Homo sapiens |
| 6655      | son of sevenless homolog 2 ( <i>Drosophila</i> )                                                                                                                                                                                    | Homo sapiens |
| 56648     | eukaryotic translation initiation factor 5A2                                                                                                                                                                                        | Homo sapiens |
| 100289210 | hypothetical protein LOC100289210                                                                                                                                                                                                   | Homo sapiens |
| 167153    | PAP associated domain containing 4                                                                                                                                                                                                  | Homo sapiens |
| 29994     | bromodomain adjacent to zinc finger domain, 2B                                                                                                                                                                                      | Homo sapiens |
| 84991     | RNA binding motif protein 17                                                                                                                                                                                                        | Homo sapiens |
| 9295      | splicing factor, arginine/serine-rich 11                                                                                                                                                                                            | Homo sapiens |
| 5094      | poly(rC) binding protein 2                                                                                                                                                                                                          | Homo sapiens |
| 202       | absent in melanoma 1                                                                                                                                                                                                                | Homo sapiens |
| 54756     | interleukin 17 receptor D                                                                                                                                                                                                           | Homo sapiens |
| 6146      | ribosomal protein L22 pseudogene 11; ribosomal protein L22                                                                                                                                                                          | Homo sapiens |
| 6478      | seven in absentia homolog 2 ( <i>Drosophila</i> )                                                                                                                                                                                   | Homo sapiens |
| 7754      | zinc finger protein 204 pseudogene                                                                                                                                                                                                  | Homo sapiens |
| 84677     | Down syndrome critical region gene 8                                                                                                                                                                                                | Homo sapiens |
| 83607     | AMME chromosomal region gene 1-like                                                                                                                                                                                                 | Homo sapiens |
| 7159      | tumor protein p53 binding protein, 2                                                                                                                                                                                                | Homo sapiens |
| 307       | annexin A4                                                                                                                                                                                                                          | Homo sapiens |
| 124944    | chromosome 17 open reading frame 49                                                                                                                                                                                                 | Homo sapiens |
| 80267     | ER degradation enhancer, mannosidase alpha-like 3                                                                                                                                                                                   | Homo sapiens |
| 84296     | GINS complex subunit 4 (Sld5 homolog)                                                                                                                                                                                               | Homo sapiens |
| 80854     | SET domain containing (lysine methyltransferase) 7                                                                                                                                                                                  | Homo sapiens |
| 28951     | tribbles homolog 2 ( <i>Drosophila</i> )                                                                                                                                                                                            | Homo sapiens |
| 91754     | NIMA (never in mitosis gene a)- related kinase 9                                                                                                                                                                                    | Homo sapiens |
| 29946     | SERTA domain containing 3                                                                                                                                                                                                           | Homo sapiens |
| 23108     | GTPase activating Rap/RanGAP domain-like 4                                                                                                                                                                                          | Homo sapiens |
| 8882      | zinc finger protein 259                                                                                                                                                                                                             | Homo sapiens |
| 259266    | asp (abnormal spindle) homolog, microcephaly associated ( <i>Drosophila</i> )                                                                                                                                                       | Homo sapiens |
| 10559     | solute carrier family 35 (CMP-sialic acid transporter), member A1                                                                                                                                                                   | Homo sapiens |
| 222546    | regulatory factor X, 6                                                                                                                                                                                                              | Homo sapiens |
| 84817     | thioredoxin domain containing 17                                                                                                                                                                                                    | Homo sapiens |
| 5565      | protein kinase, AMP-activated, beta 2 non-catalytic subunit                                                                                                                                                                         | Homo sapiens |
| 441032    | eukaryotic translation elongation factor 1 alpha-like 7; eukaryotic translation elongation factor 1 alpha-like 3; similar to eukaryotic translation elongation factor 1 alpha 1; eukaryotic translation elongation factor 1 alpha 1 | Homo sapiens |
| 1915      | eukaryotic translation elongation factor 1 alpha-like 7; eukaryotic translation elongation factor 1 alpha-like 3; similar to eukaryotic translation elongation factor 1 alpha 1; eukaryotic translation elongation factor 1 alpha 1 | Homo sapiens |
| 10311     | Down syndrome critical region gene 3                                                                                                                                                                                                | Homo sapiens |
| 5775      | protein tyrosine phosphatase, non-receptor type 4 (megakaryocyte)                                                                                                                                                                   | Homo sapiens |
| 1407      | cryptochrome 1 (photolyase-like)                                                                                                                                                                                                    | Homo sapiens |
| 2171      | fatty acid binding protein 5-like 2; fatty acid binding protein 5 (psoriasis-associated); fatty acid binding protein 5-like 8; fatty acid binding protein 5-like 7; fatty acid binding protein 5-like 9                             | Homo sapiens |
| 57150     | chromosome 6 open reading frame 162                                                                                                                                                                                                 | Homo sapiens |
| 80045     | G protein-coupled receptor 157                                                                                                                                                                                                      | Homo sapiens |
| 51259     | transmembrane protein 216                                                                                                                                                                                                           | Homo sapiens |
| 8446      | dual specificity phosphatase 11 (RNA/RNP complex 1-interacting)                                                                                                                                                                     | Homo sapiens |
| 3151      | hypothetical LOC729505; similar to hCG2040565; high-mobility group nucleosomal binding domain 2; similar to high-mobility group nucleosomal binding domain 2                                                                        | Homo sapiens |
| 1774      | deoxyribonuclease I-like 1                                                                                                                                                                                                          | Homo sapiens |
| 4536      | NADH-ubiquinone oxidoreductase chain 2                                                                                                                                                                                              | Homo sapiens |
| 79053     | asparagine-linked glycosylation 8, alpha-1,3-glucosyltransferase homolog ( <i>S. cerevisiae</i> )                                                                                                                                   | Homo sapiens |
| 29761     | ubiquitin specific peptidase 25                                                                                                                                                                                                     | Homo sapiens |
| 158       | adenylosuccinate lyase                                                                                                                                                                                                              | Homo sapiens |
| 9513      | fragile X mental retardation, autosomal homolog 2                                                                                                                                                                                   | Homo sapiens |
| 10181     | RNA binding motif protein 5                                                                                                                                                                                                         | Homo sapiens |
| 171546    | chromosome 14 open reading frame 147                                                                                                                                                                                                | Homo sapiens |
| 8451      | cullin 4A                                                                                                                                                                                                                           | Homo sapiens |
| 64400     | AKT interacting protein; similar to AKT interacting protein                                                                                                                                                                         | Homo sapiens |
| 554203    | alanyl-tRNA synthetase domain containing 1 pseudogene                                                                                                                                                                               | Homo sapiens |
| 131076    | coiled-coil domain containing 58                                                                                                                                                                                                    | Homo sapiens |
| 339263    | chromosome 17 open reading frame 51                                                                                                                                                                                                 | Homo sapiens |
| 51081     | mitochondrial ribosomal protein S7                                                                                                                                                                                                  | Homo sapiens |
| 84450     | zinc finger protein 512                                                                                                                                                                                                             | Homo sapiens |
| 116843    | chromosome 6 open reading frame 192                                                                                                                                                                                                 | Homo sapiens |
| 4296      | mitogen-activated protein kinase kinase kinase 11                                                                                                                                                                                   | Homo sapiens |
| 23196     | family with sequence similarity 120A                                                                                                                                                                                                | Homo sapiens |

|        |                                                                                                                                                                                                                |              |
|--------|----------------------------------------------------------------------------------------------------------------------------------------------------------------------------------------------------------------|--------------|
| 375133 | phosphatidylinositol 4-kinase, catalytic, alpha pseudogene 2                                                                                                                                                   | Homo sapiens |
| 11020  | RAB, member of RAS oncogene family-like 4                                                                                                                                                                      | Homo sapiens |
| 10762  | nucleoporin 50kDa                                                                                                                                                                                              | Homo sapiens |
| 58155  | polypyrimidine tract binding protein 2                                                                                                                                                                         | Homo sapiens |
| 51428  | DEAD (Asp-Glu-Ala-Asp) box polypeptide 41                                                                                                                                                                      | Homo sapiens |
| 71     | actin, gamma 1                                                                                                                                                                                                 | Homo sapiens |
| 65124  | ankyrin repeat domain 57                                                                                                                                                                                       | Homo sapiens |
| 7164   | tumor protein D52-like 1                                                                                                                                                                                       | Homo sapiens |
| 55711  | fatty acyl CoA reductase 2                                                                                                                                                                                     | Homo sapiens |
| 28972  | signal peptidase complex subunit 1 homolog (S. cerevisiae)                                                                                                                                                     | Homo sapiens |
| 11124  | Fas (TNFRSF6) associated factor 1                                                                                                                                                                              | Homo sapiens |
| 22864  | R3H domain containing 2                                                                                                                                                                                        | Homo sapiens |
| 79664  | NMDA receptor regulated 2                                                                                                                                                                                      | Homo sapiens |
| 54454  | ATPase family, AAA domain containing 2B                                                                                                                                                                        | Homo sapiens |
| 51132  | ring finger protein, LIM domain interacting; similar to ring finger protein (C3H2C3 type) 6                                                                                                                    | Homo sapiens |
| 90196  | SYS1 Golgi-localized integral membrane protein homolog (S. cerevisiae)                                                                                                                                         | Homo sapiens |
| 10787  | NCK-associated protein 1                                                                                                                                                                                       | Homo sapiens |
| 1454   | casein kinase 1, epsilon                                                                                                                                                                                       | Homo sapiens |
| 51227  | phosphatidylinositol glycan anchor biosynthesis, class P                                                                                                                                                       | Homo sapiens |
| 25873  | ribosomal protein L36; ribosomal protein L36 pseudogene 14                                                                                                                                                     | Homo sapiens |
| 23203  | peptidase (mitochondrial processing) alpha                                                                                                                                                                     | Homo sapiens |
| 6877   | TAF5 RNA polymerase II, TATA box binding protein (TBP)-associated factor, 100kDa                                                                                                                               | Homo sapiens |
| 286319 | tumor suppressor candidate 1                                                                                                                                                                                   | Homo sapiens |
| 84522  | jagunal homolog 1 (Drosophila)                                                                                                                                                                                 | Homo sapiens |
| 7003   | TEA domain family member 1 (SV40 transcriptional enhancer factor)                                                                                                                                              | Homo sapiens |
| 27327  | trinucleotide repeat containing 6A                                                                                                                                                                             | Homo sapiens |
| 728875 | hypothetical LOC728875                                                                                                                                                                                         | Homo sapiens |
| 222658 | potassium channel tetramerisation domain containing 20                                                                                                                                                         | Homo sapiens |
| 91012  | LAG1 homolog, ceramide synthase 5                                                                                                                                                                              | Homo sapiens |
| 5297   | phosphatidylinositol 4-kinase, catalytic, alpha                                                                                                                                                                | Homo sapiens |
| 6170   | ribosomal protein L39 pseudogene 10; ribosomal protein L39 pseudogene 20; ribosomal protein L39 pseudogene 27; ribosomal protein L39; ribosomal protein L39 pseudogene 13; ribosomal protein L39 pseudogene 32 | Homo sapiens |
| 9898   | ubiquitin associated protein 2-like                                                                                                                                                                            | Homo sapiens |
| 23392  | KIAA0368                                                                                                                                                                                                       | Homo sapiens |
| 999    | cadherin 1, type 1, E-cadherin (epithelial)                                                                                                                                                                    | Homo sapiens |
| 84002  | UDP-GlcNAc:betaGal beta-1,3-N-acetylglucosaminyltransferase 5                                                                                                                                                  | Homo sapiens |
| 51303  | FK506 binding protein 11, 19 kDa                                                                                                                                                                               | Homo sapiens |
| 1192   | chloride intracellular channel 1                                                                                                                                                                               | Homo sapiens |
| 5425   | polymerase (DNA directed), delta 2, regulatory subunit 50kDa                                                                                                                                                   | Homo sapiens |
| 56900  | transmembrane protein 167B                                                                                                                                                                                     | Homo sapiens |
| 55573  | CDV3 homolog (mouse)                                                                                                                                                                                           | Homo sapiens |
| 91768  | Cdk5 and Abl enzyme substrate 1                                                                                                                                                                                | Homo sapiens |
| 6908   | TATA box binding protein                                                                                                                                                                                       | Homo sapiens |
| 148203 | zinc finger protein 738                                                                                                                                                                                        | Homo sapiens |
| 23480  | Sec61 gamma subunit                                                                                                                                                                                            | Homo sapiens |
| 166336 | prickle homolog 2 (Drosophila)                                                                                                                                                                                 | Homo sapiens |
| 9015   | TATA box binding protein (TBP)-associated factor, RNA polymerase I, A, 48kDa                                                                                                                                   | Homo sapiens |
| 152137 | coiled-coil domain containing 50                                                                                                                                                                               | Homo sapiens |
| 23341  | DnaJ (Hsp40) homolog, subfamily C, member 16                                                                                                                                                                   | Homo sapiens |
| 55706  | transmembrane protein 48                                                                                                                                                                                       | Homo sapiens |
| 8439   | neutral sphingomyelinase (N-SMase) activation associated factor                                                                                                                                                | Homo sapiens |
| 5954   | reticulocalbin 1, EF-hand calcium binding domain                                                                                                                                                               | Homo sapiens |
| 51367  | processing of precursor 5, ribonuclease P/MRP subunit (S. cerevisiae)                                                                                                                                          | Homo sapiens |
| 673    | v-raf murine sarcoma viral oncogene homolog B1                                                                                                                                                                 | Homo sapiens |
| 9270   | integrin beta 1 binding protein 1                                                                                                                                                                              | Homo sapiens |
| 51397  | COMM domain containing 10                                                                                                                                                                                      | Homo sapiens |
| 55646  | Lyl antibody reactive homolog (mouse)                                                                                                                                                                          | Homo sapiens |
| 6059   | similar to ATP-binding cassette, sub-family E, member 1; ATP-binding cassette, sub-family E (OABP), member 1                                                                                                   | Homo sapiens |
| 6717   | sorcin                                                                                                                                                                                                         | Homo sapiens |
| 6773   | signal transducer and activator of transcription 2, 113kDa                                                                                                                                                     | Homo sapiens |
| 10775  | processing of precursor 4, ribonuclease P/MRP subunit (S. cerevisiae)                                                                                                                                          | Homo sapiens |
| 5469   | mediator complex subunit 1                                                                                                                                                                                     | Homo sapiens |
| 154043 | membrane associated guanylate kinase, WW and PDZ domain containing 1; CNKSR family member 3                                                                                                                    | Homo sapiens |
| 9223   | membrane associated guanylate kinase, WW and PDZ domain containing 1; CNKSR family member 3                                                                                                                    | Homo sapiens |
| 26528  | DAZ associated protein 1                                                                                                                                                                                       | Homo sapiens |
| 617    | ECS1-like (yeast)                                                                                                                                                                                              | Homo sapiens |
| 10395  | deleted in liver cancer 1                                                                                                                                                                                      | Homo sapiens |
| 205717 | KIAA2018                                                                                                                                                                                                       | Homo sapiens |
| 285268 | zinc finger protein 621                                                                                                                                                                                        | Homo sapiens |
| 4293   | mitogen-activated protein kinase kinase kinase 9                                                                                                                                                               | Homo sapiens |
| 23515  | MORC family CW-type zinc finger 3                                                                                                                                                                              | Homo sapiens |
| 6293   | vacuolar protein sorting 52 homolog (S. cerevisiae)                                                                                                                                                            | Homo sapiens |

|           |                                                                                                                                                      |              |
|-----------|------------------------------------------------------------------------------------------------------------------------------------------------------|--------------|
| 257068    | pleckstrin homology-like domain, family B, member 2; phosphatidylinositol-specific phospholipase C, X domain containing 2                            | Homo sapiens |
| 90102     | pleckstrin homology-like domain, family B, member 2; phosphatidylinositol-specific phospholipase C, X domain containing 2                            | Homo sapiens |
| 23097     | cell division cycle 2-like 6 (CDK8-like)                                                                                                             | Homo sapiens |
| 988       | CDC5 cell division cycle 5-like (S. pombe)                                                                                                           | Homo sapiens |
| 65220     | NAD kinase                                                                                                                                           | Homo sapiens |
| 26272     | F-box protein 4                                                                                                                                      | Homo sapiens |
| 55650     | phosphatidylinositol glycan anchor biosynthesis, class V                                                                                             | Homo sapiens |
| 83637     | zinc finger, MIZ-type containing 2                                                                                                                   | Homo sapiens |
| 6546      | solute carrier family 8 (sodium/calcium exchanger), member 1                                                                                         | Homo sapiens |
| 1948      | ephrin-B2                                                                                                                                            | Homo sapiens |
| 4738      | neural precursor cell expressed, developmentally down-regulated 8; similar to neural precursor cell expressed, developmentally down-regulated gene 8 | Homo sapiens |
| 6124      | ribosomal protein L4; ribosomal protein L4 pseudogene 5; ribosomal protein L4 pseudogene 4                                                           | Homo sapiens |
| 5689      | proteasome (prosome, macropain) subunit, beta type, 1                                                                                                | Homo sapiens |
| 96610     | BMS1 homolog, ribosome assembly protein (yeast) pseudogene                                                                                           | Homo sapiens |
| 340719    | nanos homolog 1 (Drosophila)                                                                                                                         | Homo sapiens |
| 79089     | transmembrane and ubiquitin-like domain containing 2                                                                                                 | Homo sapiens |
| 54968     | transmembrane protein 70                                                                                                                             | Homo sapiens |
| 328       | APEX nuclease (multifunctional DNA repair enzyme) 1                                                                                                  | Homo sapiens |
| 5201      | prefoldin subunit 1                                                                                                                                  | Homo sapiens |
| 8239      | ubiquitin specific peptidase 9, X-linked                                                                                                             | Homo sapiens |
| 100272147 | mature T-cell proliferation 1 neighbor; mature T-cell proliferation 1                                                                                | Homo sapiens |
| 30001     | ER01-like (S. cerevisiae)                                                                                                                            | Homo sapiens |
| 4233      | met proto-oncogene (hepatocyte growth factor receptor)                                                                                               | Homo sapiens |
| 55749     | cell division cycle and apoptosis regulator 1                                                                                                        | Homo sapiens |
| 6667      | Sp1 transcription factor                                                                                                                             | Homo sapiens |
| 25974     | methylmalonic aciduria (cobalamin deficiency) cb1C type, with homocystinuria                                                                         | Homo sapiens |
| 57459     | GATA zinc finger domain containing 2B                                                                                                                | Homo sapiens |
| 84064     | haloacid dehalogenase-like hydrolase domain containing 2                                                                                             | Homo sapiens |
| 84971     | ATG4 autophagy related 4 homolog D (S. cerevisiae)                                                                                                   | Homo sapiens |
| 51449     | prenylcysteine oxidase 1                                                                                                                             | Homo sapiens |
| 79029     | spermatogenesis associated 5-like 1                                                                                                                  | Homo sapiens |
| 4221      | multiple endocrine neoplasia I                                                                                                                       | Homo sapiens |
| 55009     | chromosome 19 open reading frame 24                                                                                                                  | Homo sapiens |
| 22927     | hyaluronan binding protein 4                                                                                                                         | Homo sapiens |
| 7178      | similar to tumor protein, translationally-controlled 1; tumor protein, translationally-controlled 1                                                  | Homo sapiens |
| 57403     | RAB22A, member RAS oncogene family                                                                                                                   | Homo sapiens |
| 150864    | family with sequence similarity 117, member B                                                                                                        | Homo sapiens |
| 25806     | ventral anterior homeobox 2                                                                                                                          | Homo sapiens |
| 22878     | KIAA1012                                                                                                                                             | Homo sapiens |
| 222161    | hypothetical protein DKFZp586I1420                                                                                                                   | Homo sapiens |
| 498       | ATP synthase, H+ transporting, mitochondrial F1 complex, alpha subunit 1, cardiac muscle                                                             | Homo sapiens |
| 5836      | phosphorylase, glycogen, liver                                                                                                                       | Homo sapiens |
| 60685     | zinc finger, AN1-type domain 3                                                                                                                       | Homo sapiens |
| 10987     | COP9 constitutive photomorphogenic homolog subunit 5 (Arabidopsis)                                                                                   | Homo sapiens |
| 51114     | zinc finger, DHHC-type containing 9                                                                                                                  | Homo sapiens |
| 1488      | C-terminal binding protein 2                                                                                                                         | Homo sapiens |
| 223       | aldehyde dehydrogenase 9 family, member A1                                                                                                           | Homo sapiens |
| 7561      | zinc finger protein 14                                                                                                                               | Homo sapiens |
| 51317     | PHD finger protein 21A                                                                                                                               | Homo sapiens |
| 91734     | isopentenyl-diphosphate delta isomerase 2                                                                                                            | Homo sapiens |
| 91057     | coiled-coil domain containing 34                                                                                                                     | Homo sapiens |
| 23468     | chromobox homolog 5 (HP1 alpha homolog, Drosophila)                                                                                                  | Homo sapiens |
| 1955      | multiple EGF-like-domains 9                                                                                                                          | Homo sapiens |
| 125058    | TBC1 domain family, member 16                                                                                                                        | Homo sapiens |
| 124801    | LSM12 homolog (S. cerevisiae)                                                                                                                        | Homo sapiens |
| 858       | caveolin 2                                                                                                                                           | Homo sapiens |
| 7307      | U2 small nuclear RNA auxiliary factor 1                                                                                                              | Homo sapiens |
| 56658     | tripartite motif-containing 39                                                                                                                       | Homo sapiens |
| 7994      | MYST histone acetyltransferase (monocytic leukemia) 3                                                                                                | Homo sapiens |
| 56061     | ubiquitin family domain containing 1                                                                                                                 | Homo sapiens |
| 64747     | major facilitator superfamily domain containing 1                                                                                                    | Homo sapiens |
| 4702      | NADH dehydrogenase (ubiquinone) 1 alpha subcomplex, 8, 19kDa                                                                                         | Homo sapiens |
| 51258     | mitochondrial ribosomal protein L51                                                                                                                  | Homo sapiens |
| 9782      | matrin 3                                                                                                                                             | Homo sapiens |
| 11031     | RAB31, member RAS oncogene family                                                                                                                    | Homo sapiens |
| 55075     | uveal autoantigen with coiled-coil domains and ankyrin repeats                                                                                       | Homo sapiens |
| 51651     | peptidyl-tRNA hydrolase 2                                                                                                                            | Homo sapiens |
| 1500      | catenin (cadherin-associated protein), delta 1                                                                                                       | Homo sapiens |
| 6780      | staufer, RNA binding protein, homolog 1 (Drosophila)                                                                                                 | Homo sapiens |
| 29766     | tropomodulin 3 (ubiquitous)                                                                                                                          | Homo sapiens |
| 6923      | transcription elongation factor B (SIII), polypeptide 2 (18kDa, elongin B)                                                                           | Homo sapiens |
| 7074      | T-cell lymphoma invasion and metastasis 1                                                                                                            | Homo sapiens |

|           |                                                                                             |              |
|-----------|---------------------------------------------------------------------------------------------|--------------|
| 64105     | centromere protein K                                                                        | Homo sapiens |
| 10236     | heterogeneous nuclear ribonucleoprotein R                                                   | Homo sapiens |
| 80028     | F-box and leucine-rich repeat protein 18                                                    | Homo sapiens |
| 150472    | COBW domain containing 2                                                                    | Homo sapiens |
| 1266      | calponin 3, acidic                                                                          | Homo sapiens |
| 79776     | zinc finger homeobox 4                                                                      | Homo sapiens |
| 8815      | similar to barrier-to-autointegration factor; barrier to autointegration factor 1           | Homo sapiens |
| 134353    | LSM11, U7 small nuclear RNA associated                                                      | Homo sapiens |
| 10966     | RAB40B, member RAS oncogene family                                                          | Homo sapiens |
| 53371     | nucleoporin 54kDa                                                                           | Homo sapiens |
| 84437     | KIAA1826                                                                                    | Homo sapiens |
| 100131262 | hypothetical LOC100131262                                                                   | Homo sapiens |
| 55856     | acyl-CoA thioesterase 13                                                                    | Homo sapiens |
| 286077    | family with sequence similarity 83, member H                                                | Homo sapiens |
| 8394      | phosphatidylinositol-4-phosphate 5-kinase, type I, alpha                                    | Homo sapiens |
| 28978     | transmembrane protein 14A                                                                   | Homo sapiens |
| 51646     | yippee-like 5 (Drosophila)                                                                  | Homo sapiens |
| 9686      | vestigial like 4 (Drosophila)                                                               | Homo sapiens |
| 10714     | polymerase (DNA-directed), delta 3, accessory subunit                                       | Homo sapiens |
| 5366      | phorbol-12-myristate-13-acetate-induced protein 1                                           | Homo sapiens |
| 11267     | SNF8, ESCRT-II complex subunit, homolog (S. cerevisiae)                                     | Homo sapiens |
| 11162     | nudix (nucleoside diphosphate linked moiety X)-type motif 6                                 | Homo sapiens |
| 5926      | AT rich interactive domain 4A (RBP1-like)                                                   | Homo sapiens |
| 9883      | POM121 membrane glycoprotein (rat)                                                          | Homo sapiens |
| 672       | breast cancer 1, early onset                                                                | Homo sapiens |
| 654       | bone morphogenetic protein 6                                                                | Homo sapiens |
| 6125      | ribosomal protein L5 pseudogene 34; ribosomal protein L5 pseudogene 1; ribosomal protein L5 | Homo sapiens |
| 84861     | kelch-like 22 (Drosophila)                                                                  | Homo sapiens |
| 7503      | X (inactive)-specific transcript (non-protein coding)                                       | Homo sapiens |
| 84328     | leucine zipper and CTNNBIP1 domain containing                                               | Homo sapiens |
| 29068     | zinc finger and BTB domain containing 44                                                    | Homo sapiens |
| 83479     | DEAD (Asp-Glu-Ala-Asp) box polypeptide 59                                                   | Homo sapiens |
| 339231    | ADP-ribosylation factor-like 16                                                             | Homo sapiens |
| 55226     | N-acetyltransferase 10 (GCN5-related)                                                       | Homo sapiens |
| 51603     | methyltransferase like 13                                                                   | Homo sapiens |
| 3221      | homeobox C4                                                                                 | Homo sapiens |
| 79573     | tetratricopeptide repeat domain 13                                                          | Homo sapiens |
| 79169     | chromosome 1 open reading frame 35                                                          | Homo sapiens |
| 8739      | harakiri, BCL2 interacting protein (contains only BHF3 domain)                              | Homo sapiens |
| 51374     | chromosome 2 open reading frame 28                                                          | Homo sapiens |
| 605       | B-cell CLL/lymphoma 7A                                                                      | Homo sapiens |
| 2247      | fibroblast growth factor 2 (basic)                                                          | Homo sapiens |
| 90338     | zinc finger protein 160                                                                     | Homo sapiens |
| 7163      | tumor protein D52                                                                           | Homo sapiens |
| 5376      | peripheral myelin protein 22                                                                | Homo sapiens |
| 5500      | protein phosphatase 1, catalytic subunit, beta isoform; speedy homolog A (Xenopus laevis)   | Homo sapiens |
| 158358    | KIAA2026                                                                                    | Homo sapiens |
| 54942     | chromosome 9 open reading frame 6                                                           | Homo sapiens |
| 25923     | atlastin GTPase 3                                                                           | Homo sapiens |
| 204851    | homeodomain interacting protein kinase 1                                                    | Homo sapiens |
| 284361    | chromosome 19 open reading frame 63                                                         | Homo sapiens |
| 6137      | ribosomal protein L13 pseudogene 12; ribosomal protein L13                                  | Homo sapiens |
| 8520      | histone acetyltransferase 1                                                                 | Homo sapiens |
| 10973     | activating signal cointegrator 1 complex subunit 3                                          | Homo sapiens |
| 9218      | VAMP (vesicle-associated membrane protein)-associated protein A, 33kDa                      | Homo sapiens |
| 27247     | NFU1 iron-sulfur cluster scaffold homolog (S. cerevisiae)                                   | Homo sapiens |
| 51012     | slowmo homolog 2 (Drosophila)                                                               | Homo sapiens |
| 54925     | zinc finger protein 434                                                                     | Homo sapiens |
| 56893     | ubiquilin 4                                                                                 | Homo sapiens |
| 286109    | hypothetical protein LOC286109                                                              | Homo sapiens |
| 25970     | SH2B adaptor protein 1                                                                      | Homo sapiens |
| 54851     | ankyrin repeat domain 49                                                                    | Homo sapiens |
| 91137     | solute carrier family 25, member 46                                                         | Homo sapiens |
| 9640      | zinc finger protein 592                                                                     | Homo sapiens |
| 302       | annexin A2 pseudogene 3; annexin A2; annexin A2 pseudogene 1                                | Homo sapiens |
| 58527     | chromosome 6 open reading frame 115                                                         | Homo sapiens |
| 8864      | period homolog 2 (Drosophila)                                                               | Homo sapiens |
| 9669      | eukaryotic translation initiation factor 5B                                                 | Homo sapiens |
| 7770      | zinc finger protein 227                                                                     | Homo sapiens |
| 29110     | TANK-binding kinase 1                                                                       | Homo sapiens |
| 90141     | chromosome 14 open reading frame 143                                                        | Homo sapiens |
| 123803    | N-terminal asparagine amidase                                                               | Homo sapiens |
| 116228    | family with sequence similarity 36, member A                                                | Homo sapiens |
| 55670     | peroxisomal biogenesis factor 26                                                            | Homo sapiens |
| 4729      | NADH dehydrogenase (ubiquinone) flavoprotein 2, 24kDa                                       | Homo sapiens |

|           |                                                                                                                                       |              |
|-----------|---------------------------------------------------------------------------------------------------------------------------------------|--------------|
| 80124     | valosin containing protein (p97)/p47 complex interacting protein 1                                                                    | Homo sapiens |
| 58493     | chromosome 9 open reading frame 80                                                                                                    | Homo sapiens |
| 57680     | chromodomain helicase DNA binding protein 8                                                                                           | Homo sapiens |
| 10282     | hypothetical protein LOC100128542; blocked early in transport 1 homolog (S. cerevisiae)                                               | Homo sapiens |
| 57162     | pellino homolog 1 (Drosophila)                                                                                                        | Homo sapiens |
| 89891     | WD repeat domain 34                                                                                                                   | Homo sapiens |
| 2146      | enhancer of zeste homolog 2 (Drosophila)                                                                                              | Homo sapiens |
| 7220      | transient receptor potential cation channel, subfamily C, member 1                                                                    | Homo sapiens |
| 23360     | formin binding protein 4                                                                                                              | Homo sapiens |
| 170960    | zinc finger protein 721                                                                                                               | Homo sapiens |
| 8648      | nuclear receptor coactivator 1                                                                                                        | Homo sapiens |
| 494513    | deafness, autosomal recessive 59                                                                                                      | Homo sapiens |
| 6652      | sorbitol dehydrogenase                                                                                                                | Homo sapiens |
| 84340     | G elongation factor, mitochondrial 2                                                                                                  | Homo sapiens |
| 22934     | ribose 5-phosphate isomerase A                                                                                                        | Homo sapiens |
| 10144     | family with sequence similarity 13, member A                                                                                          | Homo sapiens |
| 728392    | hypothetical protein LOC728392                                                                                                        | Homo sapiens |
| 4698      | NADH dehydrogenase (ubiquinone) 1 alpha subcomplex, 5, 13kDa                                                                          | Homo sapiens |
| 140823    | reactive oxygen species modulator 1                                                                                                   | Homo sapiens |
| 24139     | echinoderm microtubule associated protein like 2                                                                                      | Homo sapiens |
| 29128     | ubiquitin-like with PHD and ring finger domains 1                                                                                     | Homo sapiens |
| 8452      | cullin 3                                                                                                                              | Homo sapiens |
| 8065      | cullin 5                                                                                                                              | Homo sapiens |
| 476       | ATPase, Na <sup>+</sup> /K <sup>+</sup> transporting, alpha 1 polypeptide                                                             | Homo sapiens |
| 25831     | HECT domain containing 1                                                                                                              | Homo sapiens |
| 2023      | enolase 1, (alpha)                                                                                                                    | Homo sapiens |
| 4513      | Cytochrome c oxidase subunit 2                                                                                                        | Homo sapiens |
| 7414      | vinculin                                                                                                                              | Homo sapiens |
| 10609     | synaptonemal complex protein SC65                                                                                                     | Homo sapiens |
| 23403     | F-box protein 46                                                                                                                      | Homo sapiens |
| 10116     | fem-1 homolog b (C. elegans)                                                                                                          | Homo sapiens |
| 9276      | coatomer protein complex, subunit beta 2 (beta prime)                                                                                 | Homo sapiens |
| 100287616 | hypothetical protein LOC100287616                                                                                                     | Homo sapiens |
| 5898      | v-ral simian leukemia viral oncogene homolog A (ras related)                                                                          | Homo sapiens |
| 440983    | hypothetical gene supported by BC066916                                                                                               | Homo sapiens |
| 4286      | microphthalmia-associated transcription factor                                                                                        | Homo sapiens |
| 1349      | cytochrome c oxidase subunit VIIb                                                                                                     | Homo sapiens |
| 84333     | polycomb group ring finger 5                                                                                                          | Homo sapiens |
| 5471      | phosphoribosyl pyrophosphate amidotransferase                                                                                         | Homo sapiens |
| 5601      | mitogen-activated protein kinase 9                                                                                                    | Homo sapiens |
| 84056     | katanin p60 subunit A-like 1                                                                                                          | Homo sapiens |
| 9134      | cyclin E2                                                                                                                             | Homo sapiens |
| 158135    | tubulin tyrosine ligase-like family, member 11                                                                                        | Homo sapiens |
| 29890     | RNA binding motif protein 15B                                                                                                         | Homo sapiens |
| 79589     | ring finger protein 128                                                                                                               | Homo sapiens |
| 83732     | RIO kinase 1 (yeast)                                                                                                                  | Homo sapiens |
| 92140     | metadherin                                                                                                                            | Homo sapiens |
| 154791    | chromosome 7 open reading frame 55                                                                                                    | Homo sapiens |
| 10423     | CDP-diacylglycerol--inositol 3-phosphatidyltransferase (phosphatidylinositol synthase)                                                | Homo sapiens |
| 9786      | KIAA0586                                                                                                                              | Homo sapiens |
| 120526    | DnaJ (Hsp40) homolog, subfamily C, member 24                                                                                          | Homo sapiens |
| 440672    | nudix (nucleoside diphosphate linked moiety X)-type motif 4; nudix (nucleoside diphosphate linked moiety X)-type motif 4 pseudogene 1 | Homo sapiens |
| 11163     | nudix (nucleoside diphosphate linked moiety X)-type motif 4; nudix (nucleoside diphosphate linked moiety X)-type motif 4 pseudogene 1 | Homo sapiens |
| 23276     | kelch-like 18 (Drosophila)                                                                                                            | Homo sapiens |
| 55331     | alkaline ceramidase 3                                                                                                                 | Homo sapiens |
| 9847      | KIAA0528                                                                                                                              | Homo sapiens |
| 10478     | solute carrier family 25 (mitochondrial carrier; peroxisomal membrane protein, 34kDa), member 17                                      | Homo sapiens |
| 642477    | hypothetical LOC642477; hypothetical LOC400879                                                                                        | Homo sapiens |
| 55205     | similar to zinc finger protein 347; zinc finger protein 532                                                                           | Homo sapiens |
| 64946     | centromere protein H                                                                                                                  | Homo sapiens |
| 60509     | ATP/GTP binding protein-like 5                                                                                                        | Homo sapiens |
| 92906     | heterogeneous nuclear ribonucleoprotein L-like                                                                                        | Homo sapiens |
| 4200      | malic enzyme 2, NAD(+)-dependent, mitochondrial                                                                                       | Homo sapiens |
| 1351      | cytochrome c oxidase subunit 8A (ubiquitous)                                                                                          | Homo sapiens |
| 114793    | formin-like 2                                                                                                                         | Homo sapiens |
| 7756      | zinc finger protein 207                                                                                                               | Homo sapiens |
| 5151      | phosphodiesterase 8A                                                                                                                  | Homo sapiens |
| 84320     | acyl-Coenzyme A binding domain containing 6                                                                                           | Homo sapiens |
| 85437     | zinc finger CCHC-type and RNA binding motif 1                                                                                         | Homo sapiens |
| 3985      | LIM domain kinase 2                                                                                                                   | Homo sapiens |
| 157769    | family with sequence similarity 91, member A1                                                                                         | Homo sapiens |
| 284232    | ankyrin repeat domain 20 family, member A2 pseudogene; ankyrin repeat domain 20B; ankyrin repeat domain 20 family, member A4          | Homo sapiens |



|        |                                                                                                                                                                                                              |              |
|--------|--------------------------------------------------------------------------------------------------------------------------------------------------------------------------------------------------------------|--------------|
| 728747 | ankyrin repeat domain 20 family, member A2 pseudogene; ankyrin repeat domain 20B; ankyrin repeat domain 20 family, member A4                                                                                 | Homo sapiens |
| 23592  | LEM domain containing 3                                                                                                                                                                                      | Homo sapiens |
| 91298  | chromosome 12 open reading frame 29                                                                                                                                                                          | Homo sapiens |
| 534    | ATPase, H <sup>+</sup> transporting, lysosomal 13kDa, V1 subunit G2                                                                                                                                          | Homo sapiens |
| 23741  | EP300 interacting inhibitor of differentiation 1                                                                                                                                                             | Homo sapiens |
| 4673   | nucleosome assembly protein 1-like 1                                                                                                                                                                         | Homo sapiens |
| 8406   | sushi-repeat-containing protein, X-linked                                                                                                                                                                    | Homo sapiens |
| 128153 | spermatogenesis associated 17                                                                                                                                                                                | Homo sapiens |
| 10180  | RNA binding motif protein 6                                                                                                                                                                                  | Homo sapiens |
| 8573   | calcium/calmodulin-dependent serine protein kinase (MAGUK family)                                                                                                                                            | Homo sapiens |
| 7184   | heat shock protein 90kDa beta (Grp94), member 1                                                                                                                                                              | Homo sapiens |
| 6016   | Ras-like without CAAX 1                                                                                                                                                                                      | Homo sapiens |
| 1416   | crystallin, beta B2 pseudogene 1                                                                                                                                                                             | Homo sapiens |
| 56983  | KTEL (Lys-Tyr-Glu-Leu) containing 1                                                                                                                                                                          | Homo sapiens |
| 25998  | inhibitor of Bruton agammaglobulinemia tyrosine kinase                                                                                                                                                       | Homo sapiens |
| 10776  | cAMP-regulated phosphoprotein 19 pseudogene; cAMP-regulated phosphoprotein, 19kDa                                                                                                                            | Homo sapiens |
| 29893  | PSMC3 interacting protein                                                                                                                                                                                    | Homo sapiens |
| 8724   | sorting nexin 3                                                                                                                                                                                              | Homo sapiens |
| 51319  | arginine/serine-rich coiled-coil 1                                                                                                                                                                           | Homo sapiens |
| 7088   | similar to transducin-like enhancer of split 1 (E(sp1) homolog, Drosophila); transducin-like enhancer of split 1 (E(sp1) homolog, Drosophila)                                                                | Homo sapiens |
| 641977 | septin 13                                                                                                                                                                                                    | Homo sapiens |
| 55848  | chromosome 9 open reading frame 46                                                                                                                                                                           | Homo sapiens |
| 221710 | hypothetical protein LOC221710                                                                                                                                                                               | Homo sapiens |
| 57704  | glucosidase, beta (bile acid) 2                                                                                                                                                                              | Homo sapiens |
| 4026   | LIM domain containing preferred translocation partner in lipoma                                                                                                                                              | Homo sapiens |
| 29904  | eukaryotic elongation factor-2 kinase                                                                                                                                                                        | Homo sapiens |
| 1939   | ligatin                                                                                                                                                                                                      | Homo sapiens |
| 5228   | placental growth factor                                                                                                                                                                                      | Homo sapiens |
| 56005  | chromosome 19 open reading frame 10                                                                                                                                                                          | Homo sapiens |
| 81573  | ankyrin repeat domain 13C                                                                                                                                                                                    | Homo sapiens |
| 9097   | ubiquitin specific peptidase 14 (tRNA-guanine transglycosylase)                                                                                                                                              | Homo sapiens |
| 55971  | BAIL-associated protein 2-like 1                                                                                                                                                                             | Homo sapiens |
| 51571  | family with sequence similarity 49, member B                                                                                                                                                                 | Homo sapiens |
| 342357 | zinc finger with KRAB and SCAN domains 2                                                                                                                                                                     | Homo sapiens |
| 283578 | transmembrane emp24 protein transport domain containing 8                                                                                                                                                    | Homo sapiens |
| 5298   | phosphatidylinositol 4-kinase, catalytic, beta                                                                                                                                                               | Homo sapiens |
| 513    | ATP synthase, H <sup>+</sup> transporting, mitochondrial F1 complex, delta subunit                                                                                                                           | Homo sapiens |
| 5810   | RADI homolog (S. pombe)                                                                                                                                                                                      | Homo sapiens |
| 9909   | DENN/MADD domain containing 4B                                                                                                                                                                               | Homo sapiens |
| 904    | cyclin T1                                                                                                                                                                                                    | Homo sapiens |
| 126626 | GA binding protein transcription factor, beta subunit 2                                                                                                                                                      | Homo sapiens |
| 728340 | general transcription factor IIH, polypeptide 2, 44kDa; general transcription factor IIH, polypeptide 2C; general transcription factor IIH, polypeptide 2B; general transcription factor IIH, polypeptide 2D | Homo sapiens |
| 653238 | general transcription factor IIH, polypeptide 2, 44kDa; general transcription factor IIH, polypeptide 2C; general transcription factor IIH, polypeptide 2B; general transcription factor IIH, polypeptide 2D | Homo sapiens |
| 2966   | general transcription factor IIH, polypeptide 2, 44kDa; general transcription factor IIH, polypeptide 2C; general transcription factor IIH, polypeptide 2B; general transcription factor IIH, polypeptide 2D | Homo sapiens |
| 730394 | general transcription factor IIH, polypeptide 2, 44kDa; general transcription factor IIH, polypeptide 2C; general transcription factor IIH, polypeptide 2B; general transcription factor IIH, polypeptide 2D | Homo sapiens |
| 55076  | transmembrane protein 45A                                                                                                                                                                                    | Homo sapiens |
| 8546   | adaptor-related protein complex 3, beta 1 subunit                                                                                                                                                            | Homo sapiens |
| 23466  | chromobox homolog 6                                                                                                                                                                                          | Homo sapiens |
| 55781  | RIO kinase 2 (yeast)                                                                                                                                                                                         | Homo sapiens |
| 539    | ATP synthase, H <sup>+</sup> transporting, mitochondrial F1 complex, O subunit                                                                                                                               | Homo sapiens |
| 55190  | nudix (nucleoside diphosphate linked moiety X)-type motif 11                                                                                                                                                 | Homo sapiens |
| 22846  | vasohibin 1                                                                                                                                                                                                  | Homo sapiens |
| 7019   | transcription factor A, mitochondrial                                                                                                                                                                        | Homo sapiens |
| 4218   | RAB8A, member RAS oncogene family                                                                                                                                                                            | Homo sapiens |
| 2562   | gamma-aminobutyric acid (GABA) A receptor, beta 3                                                                                                                                                            | Homo sapiens |
| 9528   | transmembrane protein 59                                                                                                                                                                                     | Homo sapiens |
| 26147  | PHD finger protein 19                                                                                                                                                                                        | Homo sapiens |
| 2107   | eukaryotic translation termination factor 1                                                                                                                                                                  | Homo sapiens |
| 1314   | coatamer protein complex, subunit alpha                                                                                                                                                                      | Homo sapiens |
| 90135  | BTB (POZ) domain containing 6                                                                                                                                                                                | Homo sapiens |
| 10200  | M-phase phosphoprotein 6                                                                                                                                                                                     | Homo sapiens |
| 4191   | malate dehydrogenase 2, NAD (mitochondrial)                                                                                                                                                                  | Homo sapiens |
| 23304  | ubiquitin protein ligase E3 component n-recognin 2                                                                                                                                                           | Homo sapiens |
| 55862  | enoyl Coenzyme A hydratase domain containing 1                                                                                                                                                               | Homo sapiens |
| 84681  | histidine triad nucleotide binding protein 2                                                                                                                                                                 | Homo sapiens |
| 64860  | armadillo repeat containing, X-linked 5                                                                                                                                                                      | Homo sapiens |
| 390980 | zinc finger protein 805                                                                                                                                                                                      | Homo sapiens |

|           |                                                                                                                              |              |
|-----------|------------------------------------------------------------------------------------------------------------------------------|--------------|
| 55857     | non-protein coding RNA 153                                                                                                   | Homo sapiens |
| 134492    | NudC domain containing 2                                                                                                     | Homo sapiens |
| 26090     | abhydrolase domain containing 12                                                                                             | Homo sapiens |
| 25921     | zinc finger, DHHC-type containing 5                                                                                          | Homo sapiens |
| 8914      | timeless homolog (Drosophila)                                                                                                | Homo sapiens |
| 5303      | protein (peptidylprolyl cis/trans isomerase) NIMA-interacting, 4 (parvulin)                                                  | Homo sapiens |
| 6311      | ataxin 2                                                                                                                     | Homo sapiens |
| 11112     | 3-hydroxyisobutyrate dehydrogenase                                                                                           | Homo sapiens |
| 55333     | synaptojanin 2 binding protein                                                                                               | Homo sapiens |
| 283431    | growth arrest-specific 2 like 3                                                                                              | Homo sapiens |
| 11217     | A kinase (PRKA) anchor protein 2; paralemmin 2; PALM2-AKAP2 readthrough transcript                                           | Homo sapiens |
| 445815    | A kinase (PRKA) anchor protein 2; paralemmin 2; PALM2-AKAP2 readthrough transcript                                           | Homo sapiens |
| 65005     | mitochondrial ribosomal protein L9                                                                                           | Homo sapiens |
| 51377     | ubiquitin carboxyl-terminal hydrolase L5                                                                                     | Homo sapiens |
| 23192     | ATG4 autophagy related 4 homolog B (S. cerevisiae)                                                                           | Homo sapiens |
| 84247     | leucine zipper, down-regulated in cancer 1-like                                                                              | Homo sapiens |
| 55166     | centromere protein Q                                                                                                         | Homo sapiens |
| 58516     | similar to hCG2020539; family with sequence similarity 60, member A; similar to family with sequence similarity 60, member A | Homo sapiens |
| 283927    | nudix (nucleoside diphosphate linked moiety X)-type motif 7                                                                  | Homo sapiens |
| 28973     | mitochondrial ribosomal protein S18B                                                                                         | Homo sapiens |
| 90874     | hypothetical LOC100130667; zinc finger protein 697                                                                           | Homo sapiens |
| 10605     | poly(A) binding protein interacting protein 1; similar to poly(A) binding protein interacting protein 1                      | Homo sapiens |
| 57696     | DEAD (Asp-Glu-Ala-Asp) box polypeptide 55                                                                                    | Homo sapiens |
| 65057     | adrenocortical dysplasia homolog (mouse)                                                                                     | Homo sapiens |
| 83394     | PITPNM family member 3                                                                                                       | Homo sapiens |
| 1513      | cathepsin K                                                                                                                  | Homo sapiens |
| 55607     | protein phosphatase 1, regulatory (inhibitor) subunit 9A                                                                     | Homo sapiens |
| 6817      | sulfotransferase family, cytosolic, 1A, phenol-preferring, member 1                                                          | Homo sapiens |
| 10928     | hypothetical LOC100129773; ralA binding protein 1                                                                            | Homo sapiens |
| 8301      | phosphatidylinositol binding clathrin assembly protein                                                                       | Homo sapiens |
| 131474    | coiled-coil-helix-coiled-coil-helix domain containing 4                                                                      | Homo sapiens |
| 6385      | syndecan 4                                                                                                                   | Homo sapiens |
| 2308      | forkhead box O1                                                                                                              | Homo sapiens |
| 23423     | transmembrane emp24 protein transport domain containing 3                                                                    | Homo sapiens |
| 29990     | paired immunoglobulin-like type 2 receptor beta                                                                              | Homo sapiens |
| 214       | hypothetical protein LOC100133690; activated leukocyte cell adhesion molecule                                                | Homo sapiens |
| 6659      | SRY (sex determining region Y)-box 4                                                                                         | Homo sapiens |
| 9284      | nuclear pore complex interacting protein                                                                                     | Homo sapiens |
| 159       | adenylosuccinate synthase                                                                                                    | Homo sapiens |
| 22909     | myotubularin related protein 15                                                                                              | Homo sapiens |
| 51143     | dynein, cytoplasmic 1, light intermediate chain 1                                                                            | Homo sapiens |
| 175       | aspartylglucosaminidase                                                                                                      | Homo sapiens |
| 196394    | antagonist of mitotic exit network 1 homolog (S. cerevisiae)                                                                 | Homo sapiens |
| 29        | active BCR-related gene                                                                                                      | Homo sapiens |
| 6932      | transcription factor 7 (T-cell specific, HMG-box)                                                                            | Homo sapiens |
| 57480     | pleckstrin homology domain containing, family G (with RhoGef domain) member 1                                                | Homo sapiens |
| 84888     | signal peptide peptidase-like 2A                                                                                             | Homo sapiens |
| 55739     | carbohydrate kinase domain containing                                                                                        | Homo sapiens |
| 3661      | interferon regulatory factor 3                                                                                               | Homo sapiens |
| 158747    | motile sperm domain containing 2                                                                                             | Homo sapiens |
| 157378    | transmembrane protein 65                                                                                                     | Homo sapiens |
| 100287932 | similar to translocase of inner mitochondrial membrane 23 (yeast) homolog                                                    | Homo sapiens |
| 3005      | H1 histone family, member 0                                                                                                  | Homo sapiens |
| 51804     | SIX homeobox 4                                                                                                               | Homo sapiens |
| 9931      | helicase with zinc finger                                                                                                    | Homo sapiens |
| 9394      | heparan sulfate 6-O-sulfotransferase 1                                                                                       | Homo sapiens |
| 55752     | septin 11                                                                                                                    | Homo sapiens |
| 25934     | nipsnap homolog 3A (C. elegans)                                                                                              | Homo sapiens |
| 6734      | signal recognition particle receptor (docking protein)                                                                       | Homo sapiens |
| 10645     | calcium/calmodulin-dependent protein kinase kinase 2, beta                                                                   | Homo sapiens |
| 118980    | sideroflexin 2                                                                                                               | Homo sapiens |
| 23177     | centrosomal protein 68kDa                                                                                                    | Homo sapiens |
| 8545      | CGG triplet repeat binding protein 1                                                                                         | Homo sapiens |
| 8325      | frizzled homolog 8 (Drosophila)                                                                                              | Homo sapiens |
| 30968     | stomatin (EPB72)-like 2                                                                                                      | Homo sapiens |
| 26205     | glucocorticoid modulatory element binding protein 2                                                                          | Homo sapiens |
| 155061    | zinc finger protein 746                                                                                                      | Homo sapiens |
| 55734     | zinc finger protein 64 homolog (mouse)                                                                                       | Homo sapiens |
| 23456     | ATP-binding cassette, sub-family B (MDR/TAP), member 10                                                                      | Homo sapiens |
| 115294    | protein-L-isoaspartate (D-aspartate) O-methyltransferase domain containing 1                                                 | Homo sapiens |
| 1534      | cytochrome b-561                                                                                                             | Homo sapiens |
| 2177      | Fanconi anemia, complementation group D2                                                                                     | Homo sapiens |
| 10988     | methionyl aminopeptidase 2                                                                                                   | Homo sapiens |
| 6182      | mitochondrial ribosomal protein L12                                                                                          | Homo sapiens |
| 53344     | cysteine-rich hydrophobic domain 1                                                                                           | Homo sapiens |

|        |                                                                                                                                                                                                                                                   |              |
|--------|---------------------------------------------------------------------------------------------------------------------------------------------------------------------------------------------------------------------------------------------------|--------------|
| 4267   | CD99 molecule                                                                                                                                                                                                                                     | Homo sapiens |
| 6883   | TAF12 RNA polymerase II, TATA box binding protein (TBP)-associated factor, 20kDa                                                                                                                                                                  | Homo sapiens |
| 7175   | translocated promoter region (to activated MET oncogene)                                                                                                                                                                                          | Homo sapiens |
| 11043  | midline 2                                                                                                                                                                                                                                         | Homo sapiens |
| 26048  | zinc finger protein 500                                                                                                                                                                                                                           | Homo sapiens |
| 23512  | suppressor of zeste 12 homolog (Drosophila)                                                                                                                                                                                                       | Homo sapiens |
| 10838  | zinc finger protein 275                                                                                                                                                                                                                           | Homo sapiens |
| 28989  | methyltransferase like 11A                                                                                                                                                                                                                        | Homo sapiens |
| 55015  | PRP39 pre-mRNA processing factor 39 homolog (S. cerevisiae)                                                                                                                                                                                       | Homo sapiens |
| 23338  | PHD finger protein 15                                                                                                                                                                                                                             | Homo sapiens |
| 2786   | guanine nucleotide binding protein (G protein), gamma 4                                                                                                                                                                                           | Homo sapiens |
| 150928 | prothymosin, alpha pseudogene 5                                                                                                                                                                                                                   | Homo sapiens |
| 6136   | ribosomal protein L12 pseudogene 2; ribosomal protein L12 pseudogene 32; ribosomal protein L12 pseudogene 35; ribosomal protein L12 pseudogene 19; ribosomal protein L12 pseudogene 6; ribosomal protein L12; ribosomal protein L12 pseudogene 14 | Homo sapiens |
| 5993   | regulatory factor X, 5 (influences HLA class II expression)                                                                                                                                                                                       | Homo sapiens |
| 10591  | chromosome 6 open reading frame 108                                                                                                                                                                                                               | Homo sapiens |
| 3216   | homeobox B6                                                                                                                                                                                                                                       | Homo sapiens |
| 29078  | NADH dehydrogenase (ubiquinone) 1 alpha subcomplex, assembly factor 4; similar to HSPC125                                                                                                                                                         | Homo sapiens |
| 9183   | ZW10, kinetochore associated, homolog (Drosophila)                                                                                                                                                                                                | Homo sapiens |
| 4437   | mutS homolog 3 (E. coli)                                                                                                                                                                                                                          | Homo sapiens |
| 10128  | leucine-rich PPR-motif containing                                                                                                                                                                                                                 | Homo sapiens |
| 4719   | NADH dehydrogenase (ubiquinone) Fe-S protein 1, 75kDa (NADH-coenzyme Q reductase)                                                                                                                                                                 | Homo sapiens |
| 80010  | RMI1, RecQ mediated genome instability 1, homolog (S. cerevisiae)                                                                                                                                                                                 | Homo sapiens |
| 259282 | biorientation of chromosomes in cell division 1-like                                                                                                                                                                                              | Homo sapiens |
| 219    | aldehyde dehydrogenase 1 family, member B1                                                                                                                                                                                                        | Homo sapiens |
| 389834 | ankyrin repeat domain 57 pseudogene                                                                                                                                                                                                               | Homo sapiens |
| 2297   | forkhead box D1                                                                                                                                                                                                                                   | Homo sapiens |
| 6617   | small nuclear RNA activating complex, polypeptide 1, 43kDa                                                                                                                                                                                        | Homo sapiens |
| 10617  | STAM binding protein                                                                                                                                                                                                                              | Homo sapiens |
| 23189  | KN motif and ankyrin repeat domains 1; similar to ankyrin repeat domain protein 15 isoform b                                                                                                                                                      | Homo sapiens |
| 65095  | KRI1 homolog (S. cerevisiae)                                                                                                                                                                                                                      | Homo sapiens |
| 85015  | ubiquitin specific peptidase 45                                                                                                                                                                                                                   | Homo sapiens |
| 29855  | ubinuclein 1                                                                                                                                                                                                                                      | Homo sapiens |
| 55958  | kelch-like 9 (Drosophila)                                                                                                                                                                                                                         | Homo sapiens |
| 94274  | protein phosphatase 1, regulatory (inhibitor) subunit 14A                                                                                                                                                                                         | Homo sapiens |
| 29789  | Obg-like ATPase 1                                                                                                                                                                                                                                 | Homo sapiens |
| 1808   | dihydropyrimidinase-like 2                                                                                                                                                                                                                        | Homo sapiens |
| 3189   | heterogeneous nuclear ribonucleoprotein H3 (2H9)                                                                                                                                                                                                  | Homo sapiens |
| 57721  | methyltransferase like 14                                                                                                                                                                                                                         | Homo sapiens |
| 4820   | natural killer-tumor recognition sequence                                                                                                                                                                                                         | Homo sapiens |
| 29902  | chromosome 12 open reading frame 24                                                                                                                                                                                                               | Homo sapiens |
| 5066   | peptidylglycine alpha-amidating monooxygenase                                                                                                                                                                                                     | Homo sapiens |
| 79692  | zinc finger protein 322A                                                                                                                                                                                                                          | Homo sapiens |
| 93129  | ORAI calcium release-activated calcium modulator 3                                                                                                                                                                                                | Homo sapiens |
| 55048  | vacuolar protein sorting 37 homolog C (S. cerevisiae)                                                                                                                                                                                             | Homo sapiens |
| 1871   | E2F transcription factor 3                                                                                                                                                                                                                        | Homo sapiens |
| 51547  | sirtuin (silent mating type information regulation 2 homolog) 7 (S. cerevisiae)                                                                                                                                                                   | Homo sapiens |
| 3927   | LIM and SH3 protein 1                                                                                                                                                                                                                             | Homo sapiens |
| 10638  | S-phase response (cyclin related)                                                                                                                                                                                                                 | Homo sapiens |
| 79618  | homeobox containing 1                                                                                                                                                                                                                             | Homo sapiens |
| 30815  | ST6 (alpha-N-acetylneuraminyl-2,3-beta-galactosyl-1,3)-N-acetylgalactosaminide alpha-2,6-sialyltransferase 6                                                                                                                                      | Homo sapiens |
| 11079  | RER1 retention in endoplasmic reticulum 1 homolog (S. cerevisiae)                                                                                                                                                                                 | Homo sapiens |
| 29035  | chromosome 16 open reading frame 72                                                                                                                                                                                                               | Homo sapiens |
| 10342  | TRK-fused gene                                                                                                                                                                                                                                    | Homo sapiens |
| 5695   | proteasome (prosome, macropain) subunit, beta type, 7                                                                                                                                                                                             | Homo sapiens |
| 4832   | non-metastatic cells 3, protein expressed in                                                                                                                                                                                                      | Homo sapiens |
| 51514  | denticleless homolog (Drosophila)                                                                                                                                                                                                                 | Homo sapiens |
| 54108  | chromatin accessibility complex 1                                                                                                                                                                                                                 | Homo sapiens |
| 11320  | mannosyl (alpha-1,3)-glycoprotein beta-1,4-N-acetylglucosaminyltransferase, isozyme A                                                                                                                                                             | Homo sapiens |
| 6721   | sterol regulatory element binding transcription factor 2                                                                                                                                                                                          | Homo sapiens |
| 253832 | zinc finger, DHHC-type containing 20                                                                                                                                                                                                              | Homo sapiens |
| 23522  | MYST histone acetyltransferase (monocytic leukemia) 4                                                                                                                                                                                             | Homo sapiens |
| 211    | aminolevulinate, delta-, synthase 1                                                                                                                                                                                                               | Homo sapiens |
| 29088  | mitochondrial ribosomal protein L15                                                                                                                                                                                                               | Homo sapiens |
| 7627   | zinc finger protein 75a                                                                                                                                                                                                                           | Homo sapiens |
| 147991 | dpy-19-like 3 (C. elegans)                                                                                                                                                                                                                        | Homo sapiens |
| 51035  | UBX domain protein 1                                                                                                                                                                                                                              | Homo sapiens |
| 6282   | S100 calcium binding protein A11; S100 calcium binding protein A11 pseudogene                                                                                                                                                                     | Homo sapiens |
| 1512   | cathepsin H                                                                                                                                                                                                                                       | Homo sapiens |
| 54962  | TIMELESS interacting protein                                                                                                                                                                                                                      | Homo sapiens |
| 1647   | growth arrest and DNA-damage-inducible, alpha                                                                                                                                                                                                     | Homo sapiens |
| 9169   | splicing factor, arginine/serine-rich 2, interacting protein                                                                                                                                                                                      | Homo sapiens |
| 81559  | tripartite motif-containing 11                                                                                                                                                                                                                    | Homo sapiens |

|           |                                                                                                                                 |              |
|-----------|---------------------------------------------------------------------------------------------------------------------------------|--------------|
| 10427     | SEC24 family, member B ( <i>S. cerevisiae</i> )                                                                                 | Homo sapiens |
| 727910    | TLC domain containing 2                                                                                                         | Homo sapiens |
| 283131    | non-protein coding RNA 84                                                                                                       | Homo sapiens |
| 6238      | ribosome binding protein 1 homolog 180kDa (dog)                                                                                 | Homo sapiens |
| 55747     | family with sequence similarity 21, member B; family with sequence similarity 21, member A                                      | Homo sapiens |
| 387680    | family with sequence similarity 21, member B; family with sequence similarity 21, member A                                      | Homo sapiens |
| 64426     | suppressor of defective silencing 3 homolog ( <i>S. cerevisiae</i> )                                                            | Homo sapiens |
| 1843      | dual specificity phosphatase 1                                                                                                  | Homo sapiens |
| 23132     | RAD54-like 2 ( <i>S. cerevisiae</i> )                                                                                           | Homo sapiens |
| 23511     | nucleoporin 188kDa                                                                                                              | Homo sapiens |
| 10558     | serine palmitoyltransferase, long chain base subunit 1                                                                          | Homo sapiens |
| 55750     | acylglycerol kinase                                                                                                             | Homo sapiens |
| 23327     | neural precursor cell expressed, developmentally down-regulated 4-like                                                          | Homo sapiens |
| 94081     | sideroflexin 1                                                                                                                  | Homo sapiens |
| 144245    | asparagine-linked glycosylation 10, alpha-1,2-glucosyltransferase homolog B (yeast)                                             | Homo sapiens |
| 390066    | olfactory receptor, family 52, subfamily D, member 1                                                                            | Homo sapiens |
| 1390      | cAMP responsive element modulator                                                                                               | Homo sapiens |
| 9555      | H2A histone family, member Y                                                                                                    | Homo sapiens |
| 10643     | insulin-like growth factor 2 mRNA binding protein 3                                                                             | Homo sapiens |
| 9917      | family with sequence similarity 20, member B                                                                                    | Homo sapiens |
| 26010     | spermatogenesis associated, serine-rich 2-like                                                                                  | Homo sapiens |
| 51079     | NADH dehydrogenase (ubiquinone) 1 alpha subcomplex, 13                                                                          | Homo sapiens |
| 10735     | stromal antigen 2                                                                                                               | Homo sapiens |
| 51280     | golgi membrane protein 1                                                                                                        | Homo sapiens |
| 4215      | mitogen-activated protein kinase kinase kinase 3                                                                                | Homo sapiens |
| 170622    | COMM domain containing 6                                                                                                        | Homo sapiens |
| 27107     | zinc finger and BTB domain containing 11                                                                                        | Homo sapiens |
| 10038     | poly (ADP-ribose) polymerase 2                                                                                                  | Homo sapiens |
| 10412     | hypothetical gene supported by NM_014886; TGF beta-inducible nuclear protein 1; similar to TGF beta-inducible nuclear protein 1 | Homo sapiens |
| 54737     | M-phase phosphoprotein 8                                                                                                        | Homo sapiens |
| 90806     | angel homolog 2 ( <i>Drosophila</i> )                                                                                           | Homo sapiens |
| 64750     | SMAD specific E3 ubiquitin protein ligase 2                                                                                     | Homo sapiens |
| 7871      | sarcolemma associated protein                                                                                                   | Homo sapiens |
| 1977      | eukaryotic translation initiation factor 4E; similar to hCG1777996; similar to eukaryotic translation initiation factor 4E      | Homo sapiens |
| 2194      | fatty acid synthase                                                                                                             | Homo sapiens |
| 4086      | SMAD family member 1                                                                                                            | Homo sapiens |
| 55699     | isoleucyl-tRNA synthetase 2, mitochondrial                                                                                      | Homo sapiens |
| 56947     | mitochondrial fission factor                                                                                                    | Homo sapiens |
| 6729      | similar to signal recognition particle 54kDa; signal recognition particle 54kDa                                                 | Homo sapiens |
| 7155      | topoisomerase (DNA) II beta 180kDa                                                                                              | Homo sapiens |
| 57092     | PEST proteolytic signal containing nuclear protein                                                                              | Homo sapiens |
| 1213      | clathrin, heavy chain (Hc)                                                                                                      | Homo sapiens |
| 8891      | eukaryotic translation initiation factor 2B, subunit 3 gamma, 58kDa                                                             | Homo sapiens |
| 375       | ADP-ribosylation factor 1                                                                                                       | Homo sapiens |
| 84268     | RPA interacting protein                                                                                                         | Homo sapiens |
| 23035     | PH domain and leucine rich repeat protein phosphatase 2                                                                         | Homo sapiens |
| 2131      | exostoses (multiple) 1                                                                                                          | Homo sapiens |
| 388695    | LysM, putative peptidoglycan-binding, domain containing 1                                                                       | Homo sapiens |
| 146909    | kinesin family member 18B                                                                                                       | Homo sapiens |
| 23648     | single stranded DNA binding protein 3; hypothetical LOC100131851                                                                | Homo sapiens |
| 54492     | neutralized homolog 1B ( <i>Drosophila</i> )                                                                                    | Homo sapiens |
| 91647     | ATP synthase mitochondrial F1 complex assembly factor 2                                                                         | Homo sapiens |
| 7187      | TNF receptor-associated factor 3                                                                                                | Homo sapiens |
| 100271836 | SMG1 homolog, phosphatidylinositol 3-kinase-related kinase pseudogene                                                           | Homo sapiens |
| 49854     | zinc finger protein 295                                                                                                         | Homo sapiens |
| 80218     | N-acetyltransferase 13 (GCN5-related)                                                                                           | Homo sapiens |
| 23478     | SEC11 homolog A ( <i>S. cerevisiae</i> )                                                                                        | Homo sapiens |
| 91752     | zinc finger protein 804A                                                                                                        | Homo sapiens |
| 10540     | dynactin 2 (p50)                                                                                                                | Homo sapiens |
| 3831      | kinesin light chain 1                                                                                                           | Homo sapiens |
| 8434      | reversion-inducing-cysteine-rich protein with kazal motifs                                                                      | Homo sapiens |
| 5686      | proteasome (prosome, macropain) subunit, alpha type, 5                                                                          | Homo sapiens |
| 55147     | RNA binding motif protein 23                                                                                                    | Homo sapiens |
| 10560     | solute carrier family 19 (thiamine transporter), member 2                                                                       | Homo sapiens |
| 8976      | Wiskott-Aldrich syndrome-like                                                                                                   | Homo sapiens |
| 3313      | heat shock 70kDa protein 9 (mortalin)                                                                                           | Homo sapiens |
| 201266    | solute carrier family 39 (metal ion transporter), member 11                                                                     | Homo sapiens |
| 2665      | GDP dissociation inhibitor 2                                                                                                    | Homo sapiens |
| 9444      | quaking homolog, KH domain RNA binding (mouse)                                                                                  | Homo sapiens |
| 57507     | zinc finger protein 608                                                                                                         | Homo sapiens |
| 25961     | nudix (nucleoside diphosphate linked moiety X)-type motif 13                                                                    | Homo sapiens |
| 2261      | fibroblast growth factor receptor 3                                                                                             | Homo sapiens |
| 221322    | chromosome 6 open reading frame 170                                                                                             | Homo sapiens |

|           |                                                                                                                              |              |
|-----------|------------------------------------------------------------------------------------------------------------------------------|--------------|
| 100129361 | similar to mCG115122                                                                                                         | Homo sapiens |
| 54884     | retinol saturase (all-trans-retinol 13,14-reductase)                                                                         | Homo sapiens |
| 23479     | iron-sulfur cluster scaffold homolog (E. coli)                                                                               | Homo sapiens |
| 9197      | solute carrier family 33 (acetyl-CoA transporter), member 1                                                                  | Homo sapiens |
| 10957     | proline-rich nuclear receptor coactivator 1                                                                                  | Homo sapiens |
| 64963     | mitochondrial ribosomal protein S11                                                                                          | Homo sapiens |
| 3149      | similar to high mobility group box 3; high-mobility group box 3                                                              | Homo sapiens |
| 9693      | Rap guanine nucleotide exchange factor (GEF) 2; similar to RAPGEF2 protein                                                   | Homo sapiens |
| 51299     | neurtin 1                                                                                                                    | Homo sapiens |
| 23279     | nucleoporin 160kDa                                                                                                           | Homo sapiens |
| 23787     | mitochondrial carrier homolog 1 (C. elegans)                                                                                 | Homo sapiens |
| 10956     | osteosarcoma amplified 9, endoplasmic reticulum associated protein                                                           | Homo sapiens |
| 79980     | DSN1, MIND kinetochore complex component, homolog (S. cerevisiae)                                                            | Homo sapiens |
| 5128      | PCTAIRE protein kinase 2                                                                                                     | Homo sapiens |
| 4093      | SMAD family member 9                                                                                                         | Homo sapiens |
| 650655    | ATP-binding cassette, sub-family A (ABC1), member 17 (pseudogene)                                                            | Homo sapiens |
| 55366     | leucine-rich repeat-containing G protein-coupled receptor 4                                                                  | Homo sapiens |
| 57617     | vacuolar protein sorting 18 homolog (S. cerevisiae)                                                                          | Homo sapiens |
| 2850      | G protein-coupled receptor 27                                                                                                | Homo sapiens |
| 119016    | ArfGAP with GTPase domain, ankyrin repeat and PH domain 4; ArfGAP with GTPase domain, ankyrin repeat and PH domain 6         | Homo sapiens |
| 26148     | chromosome 10 open reading frame 12                                                                                          | Homo sapiens |
| 6711      | spectrin, beta, non-erythrocytic 1                                                                                           | Homo sapiens |
| 4836      | N-myristoyltransferase 1                                                                                                     | Homo sapiens |
| 9231      | discs, large homolog 5 (Drosophila)                                                                                          | Homo sapiens |
| 55294     | F-box and WD repeat domain containing 7                                                                                      | Homo sapiens |
| 55038     | cell division cycle associated 4                                                                                             | Homo sapiens |
| 1677      | DNA fragmentation factor, 40kDa, beta polypeptide (caspase-activated DNase)                                                  | Homo sapiens |
| 84164     | activating signal cointegrator 1 complex subunit 2                                                                           | Homo sapiens |
| 4236      | microfibrillar-associated protein 1                                                                                          | Homo sapiens |
| 11130     | ZW10 interactor                                                                                                              | Homo sapiens |
| 401207    | hypothetical protein LOC401207                                                                                               | Homo sapiens |
| 84138     | solute carrier family 7, member 6 opposite strand                                                                            | Homo sapiens |
| 7402      | utrophin                                                                                                                     | Homo sapiens |
| 3033      | hydroxyacyl-Coenzyme A dehydrogenase                                                                                         | Homo sapiens |
| 100128737 | hypothetical LOC100128737                                                                                                    | Homo sapiens |
| 91775     | family with sequence similarity 55, member C                                                                                 | Homo sapiens |
| 83636     | chromosome 19 open reading frame 12                                                                                          | Homo sapiens |
| 7268      | tetratricopeptide repeat domain 4                                                                                            | Homo sapiens |
| 83642     | selenoprotein 0                                                                                                              | Homo sapiens |
| 2697      | gap junction protein, alpha 1, 43kDa                                                                                         | Homo sapiens |
| 10569     | SLU7 splicing factor homolog (S. cerevisiae)                                                                                 | Homo sapiens |
| 1660      | DEAH (Asp-Glu-Ala-His) box polypeptide 9                                                                                     | Homo sapiens |
| 23386     | NudC domain containing 3                                                                                                     | Homo sapiens |
| 93624     | transcriptional adaptor 2 (ADA2 homolog, yeast)-beta                                                                         | Homo sapiens |
| 6509      | solute carrier family 1 (glutamate/neutral amino acid transporter), member 4                                                 | Homo sapiens |
| 65108     | MARCKS-like 1                                                                                                                | Homo sapiens |
| 3459      | interferon gamma receptor 1                                                                                                  | Homo sapiens |
| 57665     | retinol dehydrogenase 14 (all-trans/9-cis/11-cis); 5'-nucleotidase, cytosolic IB                                             | Homo sapiens |
| 3455      | interferon (alpha, beta and omega) receptor 2                                                                                | Homo sapiens |
| 57335     | zinc finger protein 286A                                                                                                     | Homo sapiens |
| 10193     | ring finger protein 41                                                                                                       | Homo sapiens |
| 23395     | leucyl-tRNA synthetase 2, mitochondrial                                                                                      | Homo sapiens |
| 84910     | transmembrane protein 87B                                                                                                    | Homo sapiens |
| 29880     | asparagine-linked glycosylation 5, dolichyl-phosphate beta-glucosyltransferase homolog (S. cerevisiae)                       | Homo sapiens |
| 441094    | hypothetical LOC441094                                                                                                       | Homo sapiens |
| 23764     | v-maf musculoaponeurotic fibrosarcoma oncogene homolog F (avian)                                                             | Homo sapiens |
| 80174     | DBF4 homolog B (S. cerevisiae)                                                                                               | Homo sapiens |
| 9589      | Wilms tumor 1 associated protein                                                                                             | Homo sapiens |
| 11041     | UDP-GlcNAc:betaGal beta-1,3-N-acetylglucosaminyltransferase 1; UDP-GlcNAc:betaGal beta-1,3-N-acetylglucosaminyltransferase 2 | Homo sapiens |
| 3200      | homeobox A3                                                                                                                  | Homo sapiens |
| 729680    | hypothetical protein LOC729680                                                                                               | Homo sapiens |
| 345757    | family with sequence similarity 174, member A                                                                                | Homo sapiens |
| 55120     | Fanconi anemia, complementation group L                                                                                      | Homo sapiens |
| 22911     | WD repeat domain 47                                                                                                          | Homo sapiens |
| 10140     | transducer of ERBB2, 1                                                                                                       | Homo sapiens |
| 1903      | sphingosine-1-phosphate receptor 3                                                                                           | Homo sapiens |
| 56255     | thioredoxin-related transmembrane protein 4                                                                                  | Homo sapiens |
| 51567     | TRAF and TNF receptor associated protein                                                                                     | Homo sapiens |
| 10482     | nuclear RNA export factor 1                                                                                                  | Homo sapiens |
| 81873     | actin related protein 2/3 complex, subunit 5-like                                                                            | Homo sapiens |
| 1123      | chimerin (chimaerin) 1                                                                                                       | Homo sapiens |
| 254863    | chromosome 17 open reading frame 61                                                                                          | Homo sapiens |
| 728689    | eukaryotic translation initiation factor 3, subunit C-like                                                                   | Homo sapiens |
| 118424    | ubiquitin-conjugating enzyme E2, J2 (UBC6 homolog, yeast)                                                                    | Homo sapiens |

|           |                                                                                                                                                                                                              |              |
|-----------|--------------------------------------------------------------------------------------------------------------------------------------------------------------------------------------------------------------|--------------|
| 10933     | mortality factor 4; mortality factor 4 like 1                                                                                                                                                                | Homo sapiens |
| 10934     | mortality factor 4; mortality factor 4 like 1                                                                                                                                                                | Homo sapiens |
| 92856     | IMP4, U3 small nucleolar ribonucleoprotein, homolog (yeast)                                                                                                                                                  | Homo sapiens |
| 23484     | leptin receptor overlapping transcript-like 1                                                                                                                                                                | Homo sapiens |
| 55884     | WD repeat and SOCS box-containing 2                                                                                                                                                                          | Homo sapiens |
| 4694      | NADH dehydrogenase (ubiquinone) 1 alpha subcomplex, 1, 7.5kDa                                                                                                                                                | Homo sapiens |
| 27345     | potassium large conductance calcium-activated channel, subfamily M, beta member 4                                                                                                                            | Homo sapiens |
| 4713      | NADH dehydrogenase (ubiquinone) 1 beta subcomplex, 7, 18kDa                                                                                                                                                  | Homo sapiens |
| 283450    | chromosome 12 open reading frame 51                                                                                                                                                                          | Homo sapiens |
| 51759     | chromosome 9 open reading frame 78                                                                                                                                                                           | Homo sapiens |
| 2868      | G protein-coupled receptor kinase 4                                                                                                                                                                          | Homo sapiens |
| 9543      | immunoglobulin superfamily, DCC subclass, member 3                                                                                                                                                           | Homo sapiens |
| 100288778 | similar to WAS protein family homolog 1                                                                                                                                                                      | Homo sapiens |
| 2802      | golgi autoantigen, golgin subfamily a, 3                                                                                                                                                                     | Homo sapiens |
| 57654     | KIAA1530                                                                                                                                                                                                     | Homo sapiens |
| 340591    | carbonic anhydrase VB pseudogene                                                                                                                                                                             | Homo sapiens |
| 1000      | cadherin 2, type 1, N-cadherin (neuronal)                                                                                                                                                                    | Homo sapiens |
| 123811    | chromosome 16 open reading frame 63                                                                                                                                                                          | Homo sapiens |
| 1211      | clathrin, light chain (Lca)                                                                                                                                                                                  | Homo sapiens |
| 7267      | tetratricopeptide repeat domain 3; tetratricopeptide repeat domain 3-like                                                                                                                                    | Homo sapiens |
| 54665     | round spermatid basic protein 1                                                                                                                                                                              | Homo sapiens |
| 56943     | enhancer of yellow 2 homolog (Drosophila)                                                                                                                                                                    | Homo sapiens |
| 8658      | tankyrase, TRF1-interacting ankyrin-related ADP-ribose polymerase                                                                                                                                            | Homo sapiens |
| 64770     | coiled-coil domain containing 14                                                                                                                                                                             | Homo sapiens |
| 283237    | tetratricopeptide repeat domain 9C                                                                                                                                                                           | Homo sapiens |
| 27042     | chromosome 1 open reading frame 107                                                                                                                                                                          | Homo sapiens |
| 65055     | receptor accessory protein 1                                                                                                                                                                                 | Homo sapiens |
| 91748     | chromosome 14 open reading frame 43                                                                                                                                                                          | Homo sapiens |
| 3632      | inositol polyphosphate-5-phosphatase, 40kDa                                                                                                                                                                  | Homo sapiens |
| 84061     | magnesium transporter 1                                                                                                                                                                                      | Homo sapiens |
| 5989      | regulatory factor X, 1 (influences HLA class II expression)                                                                                                                                                  | Homo sapiens |
| 221443    | chromosome 6 open reading frame 130                                                                                                                                                                          | Homo sapiens |
| 29087     | thymocyte nuclear protein 1                                                                                                                                                                                  | Homo sapiens |
| 83985     | spinster homolog 1 (Drosophila)                                                                                                                                                                              | Homo sapiens |
| 5901      | RAN, member RAS oncogene family                                                                                                                                                                              | Homo sapiens |
| 79630     | chromosome 1 open reading frame 54                                                                                                                                                                           | Homo sapiens |
| 11157     | LSM6 homolog, U6 small nuclear RNA associated (S. cerevisiae)                                                                                                                                                | Homo sapiens |
| 51181     | dicarbonyl/L-xylulose reductase                                                                                                                                                                              | Homo sapiens |
| 56311     | ankyrin repeat domain 7                                                                                                                                                                                      | Homo sapiens |
| 5930      | retinoblastoma binding protein 6                                                                                                                                                                             | Homo sapiens |
| 3190      | heterogeneous nuclear ribonucleoprotein K; similar to heterogeneous nuclear ribonucleoprotein K                                                                                                              | Homo sapiens |
| 79770     | thioredoxin domain containing 15                                                                                                                                                                             | Homo sapiens |
| 51510     | chromatin modifying protein 5                                                                                                                                                                                | Homo sapiens |
| 8131      | chromosome 16 open reading frame 35                                                                                                                                                                          | Homo sapiens |
| 51645     | peptidylprolyl isomerase (cyclophilin)-like 1                                                                                                                                                                | Homo sapiens |
| 4238      | microfibrillar-associated protein 3                                                                                                                                                                          | Homo sapiens |
| 374395    | transmembrane protein 179B                                                                                                                                                                                   | Homo sapiens |
| 55753     | oxoglutarate dehydrogenase-like                                                                                                                                                                              | Homo sapiens |
| 9783      | regulating synaptic membrane exocytosis 3                                                                                                                                                                    | Homo sapiens |
| 5245      | prohibitin                                                                                                                                                                                                   | Homo sapiens |
| 9948      | WD repeat domain 1                                                                                                                                                                                           | Homo sapiens |
| 4628      | myosin, heavy chain 10, non-muscle                                                                                                                                                                           | Homo sapiens |
| 9702      | centrosomal protein 57kDa                                                                                                                                                                                    | Homo sapiens |
| 7571      | zinc finger protein 23 (KOX 16)                                                                                                                                                                              | Homo sapiens |
| 284273    | zinc binding alcohol dehydrogenase domain containing 2                                                                                                                                                       | Homo sapiens |
| 25796     | 6-phosphogluconolactonase                                                                                                                                                                                    | Homo sapiens |
| 55681     | SCY1-like 2 (S. cerevisiae)                                                                                                                                                                                  | Homo sapiens |
| 653252    | translocase of inner mitochondrial membrane 23 homolog (yeast); translocase of inner mitochondrial membrane 23 homolog B (yeast)                                                                             | Homo sapiens |
| 57646     | ubiquitin specific peptidase 28                                                                                                                                                                              | Homo sapiens |
| 23199     | KIAA0182                                                                                                                                                                                                     | Homo sapiens |
| 55142     | HAUS augmin-like complex, subunit 2                                                                                                                                                                          | Homo sapiens |
| 26121     | PRP31 pre-mRNA processing factor 31 homolog (S. cerevisiae)                                                                                                                                                  | Homo sapiens |
| 8562      | density-regulated protein                                                                                                                                                                                    | Homo sapiens |
| 348801    | leukemia NUP98 fusion partner 1                                                                                                                                                                              | Homo sapiens |
| 5557      | primase, DNA, polypeptide 1 (49kDa)                                                                                                                                                                          | Homo sapiens |
| 10857     | progesterone receptor membrane component 1                                                                                                                                                                   | Homo sapiens |
| 6235      | ribosomal protein S29 pseudogene 11; ribosomal protein S29 pseudogene 16; ribosomal protein S29 pseudogene 17; ribosomal protein S29 pseudogene 3; ribosomal protein S29 pseudogene 9; ribosomal protein S29 | Homo sapiens |
| 57234     | family with sequence similarity 91, member A2                                                                                                                                                                | Homo sapiens |
| 55791     | chromosome 1 open reading frame 103                                                                                                                                                                          | Homo sapiens |
| 29966     | striatin, calmodulin binding protein 3                                                                                                                                                                       | Homo sapiens |
| 122509    | interferon, alpha-inducible protein 27-like 1                                                                                                                                                                | Homo sapiens |
| 1653      | DEAD (Asp-Glu-Ala-Asp) box polypeptide 1                                                                                                                                                                     | Homo sapiens |
| 51065     | ribosomal protein S27-like                                                                                                                                                                                   | Homo sapiens |

|           |                                                                                                                 |              |
|-----------|-----------------------------------------------------------------------------------------------------------------|--------------|
| 51762     | RAB8B, member RAS oncogene family                                                                               | Homo sapiens |
| 728411    | glucuronidase, beta-like 2; glucuronidase, beta pseudogene                                                      | Homo sapiens |
| 375513    | glucuronidase, beta-like 2; glucuronidase, beta pseudogene                                                      | Homo sapiens |
| 23361     | zinc finger protein 629                                                                                         | Homo sapiens |
| 3720      | jumonji, AT rich interactive domain 2                                                                           | Homo sapiens |
| 113115    | family with sequence similarity 54, member A                                                                    | Homo sapiens |
| 9168      | thymosin beta 10                                                                                                | Homo sapiens |
| 2879      | glutathione peroxidase 4 (phospholipid hydroperoxidase)                                                         | Homo sapiens |
| 821       | calnexin                                                                                                        | Homo sapiens |
| 25898     | ring finger and CHY zinc finger domain containing 1                                                             | Homo sapiens |
| 10179     | RNA binding motif protein 7                                                                                     | Homo sapiens |
| 7716      | vascular endothelial zinc finger 1                                                                              | Homo sapiens |
| 162       | adaptor-related protein complex 1, beta 1 subunit                                                               | Homo sapiens |
| 1017      | cyclin-dependent kinase 2                                                                                       | Homo sapiens |
| 283377    | SPRY domain containing 4                                                                                        | Homo sapiens |
| 26509     | myoferlin                                                                                                       | Homo sapiens |
| 2332      | fragile X mental retardation 1                                                                                  | Homo sapiens |
| 25777     | unc-84 homolog B ( <i>C. elegans</i> )                                                                          | Homo sapiens |
| 10097     | ARP2 actin-related protein 2 homolog (yeast)                                                                    | Homo sapiens |
| 7546      | Zic family member 2 (odd-paired homolog, <i>Drosophila</i> )                                                    | Homo sapiens |
| 388677    | Notch homolog 2 ( <i>Drosophila</i> ) N-terminal like                                                           | Homo sapiens |
| 2677      | gamma-glutamyl carboxylase                                                                                      | Homo sapiens |
| 401505    | translocase of outer mitochondrial membrane 5 homolog (yeast)                                                   | Homo sapiens |
| 55108     | BSD domain containing 1                                                                                         | Homo sapiens |
| 2254      | fibroblast growth factor 9 (glia-activating factor)                                                             | Homo sapiens |
| 221272    | hypothetical LOC221272                                                                                          | Homo sapiens |
| 26258     | pallidin homolog (mouse)                                                                                        | Homo sapiens |
| 6198      | ribosomal protein S6 kinase, 70kDa, polypeptide 1                                                               | Homo sapiens |
| 152006    | ring finger protein 38                                                                                          | Homo sapiens |
| 1604      | CD55 molecule, decay accelerating factor for complement (Cromer blood group)                                    | Homo sapiens |
| 90488     | chromosome 12 open reading frame 23                                                                             | Homo sapiens |
| 26517     | translocase of inner mitochondrial membrane 13 homolog (yeast)                                                  | Homo sapiens |
| 23111     | spastic paraplegia 20 (Troyer syndrome)                                                                         | Homo sapiens |
| 29901     | SAC3 domain containing 1                                                                                        | Homo sapiens |
| 51528     | chromosome 14 open reading frame 100                                                                            | Homo sapiens |
| 221061    | family with sequence similarity 171, member A1                                                                  | Homo sapiens |
| 22921     | methionine sulfoxide reductase B2                                                                               | Homo sapiens |
| 11275     | kelch-like 2, Mayven ( <i>Drosophila</i> )                                                                      | Homo sapiens |
| 377       | ADP-ribosylation factor 3                                                                                       | Homo sapiens |
| 4162      | melanoma cell adhesion molecule                                                                                 | Homo sapiens |
| 84881     | RNA pseudouridylate synthase domain containing 4                                                                | Homo sapiens |
| 10217     | CTD (carboxy-terminal domain, RNA polymerase II, polypeptide A) small phosphatase-like                          | Homo sapiens |
| 83460     | transmembrane protein 93                                                                                        | Homo sapiens |
| 132720    | chromosome 4 open reading frame 32                                                                              | Homo sapiens |
| 9779      | TBC1 domain family, member 5                                                                                    | Homo sapiens |
| 22823     | metal response element binding transcription factor 2                                                           | Homo sapiens |
| 990       | cell division cycle 6 homolog ( <i>S. cerevisiae</i> )                                                          | Homo sapiens |
| 9361      | lon peptidase 1, mitochondrial                                                                                  | Homo sapiens |
| 11329     | serine/threonine kinase 38                                                                                      | Homo sapiens |
| 4927      | nucleoporin 88kDa                                                                                               | Homo sapiens |
| 5868      | RAB5A, member RAS oncogene family                                                                               | Homo sapiens |
| 10208     | ubiquitin specific peptidase like 1                                                                             | Homo sapiens |
| 4000      | lamin A/C                                                                                                       | Homo sapiens |
| 729288    | zinc finger protein 286B                                                                                        | Homo sapiens |
| 26091     | hect domain and RLD 4                                                                                           | Homo sapiens |
| 64786     | TBC1 domain family, member 15                                                                                   | Homo sapiens |
| 56916     | SWI/SNF-related, matrix-associated actin-dependent regulator of chromatin, subfamily a, containing DEAD/H box 1 | Homo sapiens |
| 5108      | pericentriolar material 1                                                                                       | Homo sapiens |
| 6510      | solute carrier family 1 (neutral amino acid transporter), member 5                                              | Homo sapiens |
| 11335     | similar to chromobox homolog 3; chromobox homolog 3 (HP1 gamma homolog, <i>Drosophila</i> )                     | Homo sapiens |
| 9341      | vesicle-associated membrane protein 3 (cellubrevin)                                                             | Homo sapiens |
| 284926    | hypothetical protein LOC284926                                                                                  | Homo sapiens |
| 89890     | kelch repeat and BTB (POZ) domain containing 6                                                                  | Homo sapiens |
| 2339      | farnesyltransferase, CAAX box, alpha                                                                            | Homo sapiens |
| 6748      | signal sequence receptor, delta (translocon-associated protein delta)                                           | Homo sapiens |
| 51251     | 5'-nucleotidase, cytosolic III                                                                                  | Homo sapiens |
| 10611     | PDZ and LIM domain 5                                                                                            | Homo sapiens |
| 89796     | neuron navigator 1                                                                                              | Homo sapiens |
| 25830     | sulfotransferase family 4A, member 1                                                                            | Homo sapiens |
| 85352     | KIAA1644                                                                                                        | Homo sapiens |
| 5597      | mitogen-activated protein kinase 6                                                                              | Homo sapiens |
| 7385      | ubiquinol-cytochrome c reductase core protein II                                                                | Homo sapiens |
| 10062     | nuclear receptor subfamily 1, group H, member 3                                                                 | Homo sapiens |
| 100130219 | similar to hCG2041987                                                                                           | Homo sapiens |
| 2050      | EPH receptor B4                                                                                                 | Homo sapiens |
| 10793     | zinc finger protein 273                                                                                         | Homo sapiens |

|           |                                                                                                                                                                                                                                                                                                                                                                                                    |              |
|-----------|----------------------------------------------------------------------------------------------------------------------------------------------------------------------------------------------------------------------------------------------------------------------------------------------------------------------------------------------------------------------------------------------------|--------------|
| 6139      | ribosomal protein L17 pseudogene 22; ribosomal protein L17 pseudogene 36; ribosomal protein L17 pseudogene 20; similar to ribosomal protein L17; ribosomal protein L17 pseudogene 33; ribosomal protein L17 pseudogene 34; ribosomal protein L17 pseudogene 9; ribosomal protein L17; ribosomal protein L17 pseudogene 18; ribosomal protein L17 pseudogene 7; ribosomal protein L17 pseudogene 39 | Homo sapiens |
| 2222      | farnesyl-diphosphate farnesyltransferase 1                                                                                                                                                                                                                                                                                                                                                         | Homo sapiens |
| 11159     | RAB, member of RAS oncogene family-like 2A                                                                                                                                                                                                                                                                                                                                                         | Homo sapiens |
| 64328     | exportin 4                                                                                                                                                                                                                                                                                                                                                                                         | Homo sapiens |
| 57587     | KIAA1430                                                                                                                                                                                                                                                                                                                                                                                           | Homo sapiens |
| 163859    | chromosome 1 open reading frame 55                                                                                                                                                                                                                                                                                                                                                                 | Homo sapiens |
| 5978      | RE1-silencing transcription factor                                                                                                                                                                                                                                                                                                                                                                 | Homo sapiens |
| 100288092 | hypothetical protein LOC100288092                                                                                                                                                                                                                                                                                                                                                                  | Homo sapiens |
| 100129550 | hypothetical LOC100129550                                                                                                                                                                                                                                                                                                                                                                          | Homo sapiens |
| 368       | ATP-binding cassette, sub-family C, member 6 pseudogene 2; ATP-binding cassette, sub-family C (CFTR/MRP), member 6                                                                                                                                                                                                                                                                                 | Homo sapiens |
| 55182     | ring finger protein 220                                                                                                                                                                                                                                                                                                                                                                            | Homo sapiens |
| 23165     | nucleoporin 205kDa                                                                                                                                                                                                                                                                                                                                                                                 | Homo sapiens |
| 6727      | signal recognition particle 14kDa (homologous Alu RNA binding protein) pseudogene 1; signal recognition particle 14kDa (homologous Alu RNA binding protein)                                                                                                                                                                                                                                        | Homo sapiens |
| 84790     | tubulin, alpha 1c                                                                                                                                                                                                                                                                                                                                                                                  | Homo sapiens |
| 9695      | ER degradation enhancer, mannosidase alpha-like 1                                                                                                                                                                                                                                                                                                                                                  | Homo sapiens |
| 11224     | ribosomal protein L35; ribosomal protein L35 pseudogene 1; ribosomal protein L35 pseudogene 2                                                                                                                                                                                                                                                                                                      | Homo sapiens |
| 55233     | MOB1, Mps One Binder kinase activator-like 1B (yeast)                                                                                                                                                                                                                                                                                                                                              | Homo sapiens |
| 10904     | bladder cancer associated protein                                                                                                                                                                                                                                                                                                                                                                  | Homo sapiens |
| 1827      | regulator of calcineurin 1                                                                                                                                                                                                                                                                                                                                                                         | Homo sapiens |
| 664       | BCL2/adenovirus E1B 19kDa interacting protein 3                                                                                                                                                                                                                                                                                                                                                    | Homo sapiens |
| 10613     | ER lipid raft associated 1                                                                                                                                                                                                                                                                                                                                                                         | Homo sapiens |
| 9525      | vacuolar protein sorting 4 homolog B ( <i>S. cerevisiae</i> )                                                                                                                                                                                                                                                                                                                                      | Homo sapiens |
| 1184      | chloride channel 5                                                                                                                                                                                                                                                                                                                                                                                 | Homo sapiens |
| 10146     | GTPase activating protein (SH3 domain) binding protein 1                                                                                                                                                                                                                                                                                                                                           | Homo sapiens |
| 112942    | coiled-coil domain containing 104                                                                                                                                                                                                                                                                                                                                                                  | Homo sapiens |
| 112858    | TP53 regulating kinase                                                                                                                                                                                                                                                                                                                                                                             | Homo sapiens |
| 23313     | chromosome 22 open reading frame 9                                                                                                                                                                                                                                                                                                                                                                 | Homo sapiens |
| 1829      | desmoglein 2                                                                                                                                                                                                                                                                                                                                                                                       | Homo sapiens |
| 6196      | ribosomal protein S6 kinase, 90kDa, polypeptide 2; hypothetical LOC100127984                                                                                                                                                                                                                                                                                                                       | Homo sapiens |
| 84100     | ADP-ribosylation factor-like 6                                                                                                                                                                                                                                                                                                                                                                     | Homo sapiens |
| 10944     | chromosome 11 open reading frame 58 pseudogene; chromosome 11 open reading frame 58                                                                                                                                                                                                                                                                                                                | Homo sapiens |
| 51077     | FCF1 small subunit (SSU) processome component homolog ( <i>S. cerevisiae</i> )                                                                                                                                                                                                                                                                                                                     | Homo sapiens |
| 8665      | eukaryotic translation initiation factor 3, subunit F; similar to hCG2040283                                                                                                                                                                                                                                                                                                                       | Homo sapiens |
| 54813     | kelch-like 28 ( <i>Drosophila</i> )                                                                                                                                                                                                                                                                                                                                                                | Homo sapiens |
| 7386      | ubiquinol-cytochrome c reductase, Rieske iron-sulfur polypeptide-like 1; ubiquinol-cytochrome c reductase, Rieske iron-sulfur polypeptide 1                                                                                                                                                                                                                                                        | Homo sapiens |
| 54621     | hypothetical protein FLJ20674                                                                                                                                                                                                                                                                                                                                                                      | Homo sapiens |
| 1635      | dCMP deaminase                                                                                                                                                                                                                                                                                                                                                                                     | Homo sapiens |
| 84140     | family with sequence similarity 161, member A                                                                                                                                                                                                                                                                                                                                                      | Homo sapiens |
| 27253     | protocadherin 17                                                                                                                                                                                                                                                                                                                                                                                   | Homo sapiens |
| 10308     | zinc finger protein 267                                                                                                                                                                                                                                                                                                                                                                            | Homo sapiens |
| 11037     | stonin 1; STON1-GTF2A1L readthrough transcript; general transcription factor IIA, 1-like                                                                                                                                                                                                                                                                                                           | Homo sapiens |
| 54994     | chromosome 20 open reading frame 11                                                                                                                                                                                                                                                                                                                                                                | Homo sapiens |
| 7020      | transcription factor AP-2 alpha (activating enhancer binding protein 2 alpha)                                                                                                                                                                                                                                                                                                                      | Homo sapiens |
| 10020     | glucosamine (UDP-N-acetyl)-2-epimerase/N-acetylmannosamine kinase                                                                                                                                                                                                                                                                                                                                  | Homo sapiens |
| 100288911 | hypothetical protein LOC100288911                                                                                                                                                                                                                                                                                                                                                                  | Homo sapiens |
| 9831      | zinc finger protein 623                                                                                                                                                                                                                                                                                                                                                                            | Homo sapiens |
| 728489    | DNL-type zinc finger                                                                                                                                                                                                                                                                                                                                                                               | Homo sapiens |
| 9913      | suppressor of Ty 7 ( <i>S. cerevisiae</i> )-like                                                                                                                                                                                                                                                                                                                                                   | Homo sapiens |
| 79158     | N-acetylglucosamine-1-phosphate transferase, alpha and beta subunits                                                                                                                                                                                                                                                                                                                               | Homo sapiens |
| 154150    | hepatoma derived growth factor-like 1                                                                                                                                                                                                                                                                                                                                                              | Homo sapiens |
| 134510    | ubiquitin-like domain containing CTD phosphatase 1                                                                                                                                                                                                                                                                                                                                                 | Homo sapiens |
| 5660      | prosaposin                                                                                                                                                                                                                                                                                                                                                                                         | Homo sapiens |
| 7037      | transferrin receptor (p90, CD71)                                                                                                                                                                                                                                                                                                                                                                   | Homo sapiens |
| 11193     | WW domain binding protein 4 (formin binding protein 21)                                                                                                                                                                                                                                                                                                                                            | Homo sapiens |
| 56957     | OTU domain containing 7B                                                                                                                                                                                                                                                                                                                                                                           | Homo sapiens |
| 55215     | Fanconi anemia, complementation group I                                                                                                                                                                                                                                                                                                                                                            | Homo sapiens |
| 9698      | pumilio homolog 1 ( <i>Drosophila</i> )                                                                                                                                                                                                                                                                                                                                                            | Homo sapiens |
| 50488     | misshapen-like kinase 1 (zebrafish)                                                                                                                                                                                                                                                                                                                                                                | Homo sapiens |
| 170850    | potassium voltage-gated channel, subfamily G, member 3                                                                                                                                                                                                                                                                                                                                             | Homo sapiens |
| 6891      | transporter 2, ATP-binding cassette, sub-family B (MDR/TAP)                                                                                                                                                                                                                                                                                                                                        | Homo sapiens |
| 8027      | signal transducing adaptor molecule (SH3 domain and ITAM motif) 1                                                                                                                                                                                                                                                                                                                                  | Homo sapiens |
| 100290215 | similar to actin-related protein 3-beta                                                                                                                                                                                                                                                                                                                                                            | Homo sapiens |
| 60436     | TGFB-induced factor homeobox 2                                                                                                                                                                                                                                                                                                                                                                     | Homo sapiens |
| 79188     | transmembrane protein 43                                                                                                                                                                                                                                                                                                                                                                           | Homo sapiens |
| 8349      | histone cluster 2, H2be                                                                                                                                                                                                                                                                                                                                                                            | Homo sapiens |
| 55717     | bromodomain and WD repeat domain containing 2                                                                                                                                                                                                                                                                                                                                                      | Homo sapiens |
| 817       | calcium/calmodulin-dependent protein kinase II delta                                                                                                                                                                                                                                                                                                                                               | Homo sapiens |
| 387640    | chromosome 10 open reading frame 140                                                                                                                                                                                                                                                                                                                                                               | Homo sapiens |
| 7918      | HLA-B associated transcript 4                                                                                                                                                                                                                                                                                                                                                                      | Homo sapiens |



|        |                                                                                                                   |              |
|--------|-------------------------------------------------------------------------------------------------------------------|--------------|
| 9131   | apoptosis-inducing factor, mitochondrion-associated, 1                                                            | Homo sapiens |
| 2935   | G1 to S phase transition 1                                                                                        | Homo sapiens |
| 5042   | poly(A) binding protein, cytoplasmic 3                                                                            | Homo sapiens |
| 90441  | zinc finger protein 622                                                                                           | Homo sapiens |
| 7625   | zinc finger protein 74                                                                                            | Homo sapiens |
| 25820  | ariadne homolog, ubiquitin-conjugating enzyme E2 binding protein, 1 (Drosophila)                                  | Homo sapiens |
| 9412   | mediator complex subunit 21                                                                                       | Homo sapiens |
| 27089  | ubiquinol-cytochrome c reductase, complex III subunit VII, 9.5kDa                                                 | Homo sapiens |
| 8099   | cyclin-dependent kinase 2 associated protein 1                                                                    | Homo sapiens |
| 147841 | SPC24, NDC80 kinetochore complex component, homolog (S. cerevisiae)                                               | Homo sapiens |
| 4850   | CCR4-NOT transcription complex, subunit 4                                                                         | Homo sapiens |
| 148479 | PHD finger protein 13                                                                                             | Homo sapiens |
| 8905   | adaptor-related protein complex 1, sigma 2 subunit pseudogene; adaptor-related protein complex 1, sigma 2 subunit | Homo sapiens |
| 387647 | patched domain containing 3 pseudogene                                                                            | Homo sapiens |
| 79048  | SECIS binding protein 2                                                                                           | Homo sapiens |
| 58497  | prune homolog (Drosophila)                                                                                        | Homo sapiens |
| 23595  | origin recognition complex, subunit 3-like (yeast)                                                                | Homo sapiens |
| 54552  | guanine nucleotide binding protein-like 3 (nucleolar)-like                                                        | Homo sapiens |
| 219333 | ubiquitin specific peptidase 12                                                                                   | Homo sapiens |
| 3093   | ubiquitin-conjugating enzyme E2K (UBC1 homolog, yeast)                                                            | Homo sapiens |
| 11062  | dihydrouridine synthase 4-like (S. cerevisiae)                                                                    | Homo sapiens |
| 645323 | hypothetical LOC645323; microRNA 9-2                                                                              | Homo sapiens |
| 5612   | protein-kinase, interferon-inducible double stranded RNA dependent inhibitor, repressor of (P58 repressor)        | Homo sapiens |
| 23142  | DCN1, defective in cullin neddylation 1, domain containing 4 (S. cerevisiae)                                      | Homo sapiens |
| 9849   | zinc finger protein 518A                                                                                          | Homo sapiens |
| 54386  | telomeric repeat binding factor 2, interacting protein                                                            | Homo sapiens |
| 10668  | cell growth regulator with ring finger domain 1                                                                   | Homo sapiens |
| 644068 | ribosomal protein S14 pseudogene 3                                                                                | Homo sapiens |
| 381    | ADP-ribosylation factor 5                                                                                         | Homo sapiens |
| 6595   | SWI/SNF related, matrix associated, actin dependent regulator of chromatin, subfamily a, member 2                 | Homo sapiens |
| 5693   | proteasome (prosome, macropain) subunit, beta type, 5                                                             | Homo sapiens |
| 9556   | chromosome 14 open reading frame 2                                                                                | Homo sapiens |
| 9781   | ring finger protein 144A                                                                                          | Homo sapiens |
| 3015   | H2A histone family, member Z                                                                                      | Homo sapiens |
| 51306  | family with sequence similarity 13, member B                                                                      | Homo sapiens |
| 93134  | zinc finger protein 561; zinc finger protein 812                                                                  | Homo sapiens |
| 57478  | ubiquitin specific peptidase 31                                                                                   | Homo sapiens |
| 7976   | frizzled homolog 3 (Drosophila)                                                                                   | Homo sapiens |
| 2058   | glutamyl-prolyl-tRNA synthetase                                                                                   | Homo sapiens |
| 4706   | NADH dehydrogenase (ubiquinone) 1, alpha/beta subcomplex, 1, 8kDa                                                 | Homo sapiens |
| 5510   | protein phosphatase 1, regulatory (inhibitor) subunit 7                                                           | Homo sapiens |
| 8727   | catenin (cadherin-associated protein), alpha-like 1                                                               | Homo sapiens |
| 79447  | chromosome 16 open reading frame 53                                                                               | Homo sapiens |
| 84669  | similar to TBC1 domain family, member 3; ubiquitin specific peptidase 32                                          | Homo sapiens |
| 85358  | SH3 and multiple ankyrin repeat domains 3                                                                         | Homo sapiens |
| 22862  | fibronectin type III domain containing 3A                                                                         | Homo sapiens |
| 6018   | rearranged L-myc fusion                                                                                           | Homo sapiens |
| 388591 | ring finger protein 207                                                                                           | Homo sapiens |
| 1182   | chloride channel 3                                                                                                | Homo sapiens |
| 57724  | KIAA1632                                                                                                          | Homo sapiens |
| 23002  | dishevelled associated activator of morphogenesis 1                                                               | Homo sapiens |
| 54987  | chromosome 1 open reading frame 123                                                                               | Homo sapiens |
| 54931  | RNA (guanine-9-) methyltransferase domain containing 1                                                            | Homo sapiens |
| 8607   | RuvB-like 1 (E. coli)                                                                                             | Homo sapiens |
| 222166 | chromosome 7 open reading frame 41                                                                                | Homo sapiens |
| 892    | cyclin C                                                                                                          | Homo sapiens |
| 55835  | centromere protein J                                                                                              | Homo sapiens |
| 57761  | tribbles homolog 3 (Drosophila)                                                                                   | Homo sapiens |
| 636    | bicaudal D homolog 1 (Drosophila)                                                                                 | Homo sapiens |
| 25800  | solute carrier family 39 (zinc transporter), member 6                                                             | Homo sapiens |
| 399948 | chromosome 11 open reading frame 92                                                                               | Homo sapiens |
| 161436 | echinoderm microtubule associated protein like 5                                                                  | Homo sapiens |
| 9031   | bromodomain adjacent to zinc finger domain, 1B                                                                    | Homo sapiens |
| 29929  | asparagine-linked glycosylation 6, alpha-1,3-glucosyltransferase homolog (S. cerevisiae)                          | Homo sapiens |
| 10962  | myeloid/lymphoid or mixed-lineage leukemia (trithorax homolog, Drosophila); translocated to, 11                   | Homo sapiens |
| 64768  | inositol 1,3,4,5,6-pentakisphosphate 2-kinase                                                                     | Homo sapiens |
| 8630   | hydroxysteroid (17-beta) dehydrogenase 6 homolog (mouse)                                                          | Homo sapiens |
| 57458  | transmembrane and coiled-coil domain family 3                                                                     | Homo sapiens |
| 55164  | SHQ1 homolog (S. cerevisiae)                                                                                      | Homo sapiens |
| 9308   | CD83 molecule                                                                                                     | Homo sapiens |
| 3225   | homeobox C9                                                                                                       | Homo sapiens |
| 4952   | oculocerebrorenal syndrome of Lowe                                                                                | Homo sapiens |
| 25957  | splicing factor, arginine/serine-rich 18                                                                          | Homo sapiens |

|        |                                                                                                                                                                                                                      |              |
|--------|----------------------------------------------------------------------------------------------------------------------------------------------------------------------------------------------------------------------|--------------|
| 9141   | programmed cell death 5                                                                                                                                                                                              | Homo sapiens |
| 797    | calcitonin-related polypeptide beta                                                                                                                                                                                  | Homo sapiens |
| 79003  | MIS12, MIND kinetochore complex component, homolog (S. pombe)                                                                                                                                                        | Homo sapiens |
| 79073  | transmembrane protein 109                                                                                                                                                                                            | Homo sapiens |
| 1059   | centromere protein B, 80kDa                                                                                                                                                                                          | Homo sapiens |
| 6574   | solute carrier family 20 (phosphate transporter), member 1                                                                                                                                                           | Homo sapiens |
| 84747  | unc-119 homolog B (C. elegans)                                                                                                                                                                                       | Homo sapiens |
| 51010  | exosome component 3                                                                                                                                                                                                  | Homo sapiens |
| 6207   | ribosomal protein S13 pseudogene 8; ribosomal protein S13; ribosomal protein S13 pseudogene 2                                                                                                                        | Homo sapiens |
| 64854  | ubiquitin specific peptidase 46                                                                                                                                                                                      | Homo sapiens |
| 157574 | F-box protein 16                                                                                                                                                                                                     | Homo sapiens |
| 10384  | butyrophilin, subfamily 3, member A3                                                                                                                                                                                 | Homo sapiens |
| 653121 | zinc finger and BTB domain containing 8A                                                                                                                                                                             | Homo sapiens |
| 23099  | zinc finger and BTB domain containing 43                                                                                                                                                                             | Homo sapiens |
| 54206  | ERBB receptor feedback inhibitor 1                                                                                                                                                                                   | Homo sapiens |
| 81689  | iron-sulfur cluster assembly 1 homolog (S. cerevisiae)                                                                                                                                                               | Homo sapiens |
| 5192   | peroxisomal biogenesis factor 10                                                                                                                                                                                     | Homo sapiens |
| 4171   | minichromosome maintenance complex component 2                                                                                                                                                                       | Homo sapiens |
| 728026 | hypothetical LOC728026; prothymosin, alpha; hypothetical gene supported by BC013859; prothymosin, alpha pseudogene 4 (gene sequence 112)                                                                             | Homo sapiens |
| 441454 | hypothetical LOC728026; prothymosin, alpha; hypothetical gene supported by BC013859; prothymosin, alpha pseudogene 4 (gene sequence 112)                                                                             | Homo sapiens |
| 5757   | hypothetical LOC728026; prothymosin, alpha; hypothetical gene supported by BC013859; prothymosin, alpha pseudogene 4 (gene sequence 112)                                                                             | Homo sapiens |
| 57050  | UTP3, small subunit (SSU) processome component, homolog (S. cerevisiae)                                                                                                                                              | Homo sapiens |
| 57585  | Crm, cramped-like (Drosophila)                                                                                                                                                                                       | Homo sapiens |
| 2201   | fibrillin 2                                                                                                                                                                                                          | Homo sapiens |
| 57801  | hairy and enhancer of split 4 (Drosophila)                                                                                                                                                                           | Homo sapiens |
| 60493  | FAST kinase domains 5                                                                                                                                                                                                | Homo sapiens |
| 79598  | centrosomal protein 97kDa                                                                                                                                                                                            | Homo sapiens |
| 55611  | OTU domain, ubiquitin aldehyde binding 1                                                                                                                                                                             | Homo sapiens |
| 6938   | transcription factor 12                                                                                                                                                                                              | Homo sapiens |
| 57786  | hypothetical LOC389458; RB-associated KRAB zinc finger                                                                                                                                                               | Homo sapiens |
| 85415  | rhopilin, Rho GTPase binding protein 2; similar to rhophilin, Rho GTPase binding protein 2                                                                                                                           | Homo sapiens |
| 150726 | F-box protein 41                                                                                                                                                                                                     | Homo sapiens |
| 8837   | CASP8 and FADD-like apoptosis regulator                                                                                                                                                                              | Homo sapiens |
| 644353 | zinc finger, CCHC domain containing 18                                                                                                                                                                               | Homo sapiens |
| 10653  | serine peptidase inhibitor, Kunitz type, 2                                                                                                                                                                           | Homo sapiens |
| 81856  | zinc finger protein 611                                                                                                                                                                                              | Homo sapiens |
| 10594  | PRP8 pre-mRNA processing factor 8 homolog (S. cerevisiae)                                                                                                                                                            | Homo sapiens |
| 257218 | SNF2 histone linker PHD RING helicase                                                                                                                                                                                | Homo sapiens |
| 4946   | ornithine decarboxylase antizyme 1                                                                                                                                                                                   | Homo sapiens |
| 91272  | biorientation of chromosomes in cell division 1                                                                                                                                                                      | Homo sapiens |
| 55114  | Rho GTPase activating protein 17                                                                                                                                                                                     | Homo sapiens |
| 10015  | programmed cell death 6 interacting protein                                                                                                                                                                          | Homo sapiens |
| 771    | carbonic anhydrase XII                                                                                                                                                                                               | Homo sapiens |
| 5358   | plastin 3 (T isoform)                                                                                                                                                                                                | Homo sapiens |
| 64172  | O-sialoglycoprotein endopeptidase-like 1                                                                                                                                                                             | Homo sapiens |
| 4726   | NADH dehydrogenase (ubiquinone) Fe-S protein 6, 13kDa (NADH-coenzyme Q reductase)                                                                                                                                    | Homo sapiens |
| 84153  | ribonuclease H2, subunit C                                                                                                                                                                                           | Homo sapiens |
| 6599   | SWI/SNF related, matrix associated, actin dependent regulator of chromatin, subfamily c, member 1                                                                                                                    | Homo sapiens |
| 26053  | autism susceptibility candidate 2                                                                                                                                                                                    | Homo sapiens |
| 1981   | eukaryotic translation initiation factor 4 gamma, 1                                                                                                                                                                  | Homo sapiens |
| 81839  | vang-like 1 (van gogh, Drosophila)                                                                                                                                                                                   | Homo sapiens |
| 222236 | N-acyl phosphatidylethanolamine phospholipase D                                                                                                                                                                      | Homo sapiens |
| 7543   | zinc finger protein, X-linked                                                                                                                                                                                        | Homo sapiens |
| 10092  | actin related protein 2/3 complex, subunit 5, 16kDa                                                                                                                                                                  | Homo sapiens |
| 4522   | methylenetetrahydrofolate dehydrogenase (NADP+ dependent) 1, methenyltetrahydrofolate cyclohydrolase, formyltetrahydrofolate synthetase                                                                              | Homo sapiens |
| 90271  | chromosome 10 open reading frame 75                                                                                                                                                                                  | Homo sapiens |
| 5433   | polymerase (RNA) II (DNA directed) polypeptide D                                                                                                                                                                     | Homo sapiens |
| 22834  | zinc finger protein 652                                                                                                                                                                                              | Homo sapiens |
| 8527   | diacylglycerol kinase, delta 130kDa                                                                                                                                                                                  | Homo sapiens |
| 50717  | WD repeat domain 42A                                                                                                                                                                                                 | Homo sapiens |
| 64979  | mitochondrial ribosomal protein L36                                                                                                                                                                                  | Homo sapiens |
| 6210   | ribosomal protein S15a pseudogene 17; ribosomal protein S15a pseudogene 19; ribosomal protein S15a pseudogene 12; ribosomal protein S15a pseudogene 24; ribosomal protein S15a pseudogene 11; ribosomal protein S15a | Homo sapiens |
| 23262  | histidine acid phosphatase domain containing 1                                                                                                                                                                       | Homo sapiens |
| 5571   | protein kinase, AMP-activated, gamma 1 non-catalytic subunit                                                                                                                                                         | Homo sapiens |
| 160428 | aldehyde dehydrogenase 1 family, member L2                                                                                                                                                                           | Homo sapiens |
| 130535 | potassium channel tetramerisation domain containing 18                                                                                                                                                               | Homo sapiens |
| 64927  | tetratricopeptide repeat domain 23                                                                                                                                                                                   | Homo sapiens |
| 253635 | coiled-coil domain containing 75                                                                                                                                                                                     | Homo sapiens |

|           |                                                                                                      |              |
|-----------|------------------------------------------------------------------------------------------------------|--------------|
| 1287      | collagen, type IV, alpha 5                                                                           | Homo sapiens |
| 23379     | KIAA0947                                                                                             | Homo sapiens |
| 56937     | prostate transmembrane protein, androgen induced 1                                                   | Homo sapiens |
| 8883      | NEDD8 activating enzyme E1 subunit 1                                                                 | Homo sapiens |
| 154467    | chromosome 6 open reading frame 129                                                                  | Homo sapiens |
| 22920     | kinesin-associated protein 3                                                                         | Homo sapiens |
| 5830      | peroxisomal biogenesis factor 5                                                                      | Homo sapiens |
| 2319      | flotillin 2                                                                                          | Homo sapiens |
| 5683      | proteasome (prosome, macropain) subunit, alpha type, 2                                               | Homo sapiens |
| 51292     | guanosine monophosphate reductase 2                                                                  | Homo sapiens |
| 79064     | transmembrane protein 223                                                                            | Homo sapiens |
| 7384      | ubiquinol-cytochrome c reductase core protein I                                                      | Homo sapiens |
| 836       | caspase 3, apoptosis-related cysteine peptidase                                                      | Homo sapiens |
| 2803      | golgi autoantigen, golgin subfamily a, 4                                                             | Homo sapiens |
| 5226      | phosphogluconate dehydrogenase                                                                       | Homo sapiens |
| 11235     | programmed cell death 10                                                                             | Homo sapiens |
| 55588     | mediator complex subunit 29                                                                          | Homo sapiens |
| 5931      | retinoblastoma binding protein 7                                                                     | Homo sapiens |
| 8323      | frizzled homolog 6 (Drosophila)                                                                      | Homo sapiens |
| 79768     | chromosome 15 open reading frame 29                                                                  | Homo sapiens |
| 148189    | hypothetical LOC148189                                                                               | Homo sapiens |
| 8773      | synaptosomal-associated protein, 23kDa                                                               | Homo sapiens |
| 6634      | small nuclear ribonucleoprotein D3 polypeptide 18kDa                                                 | Homo sapiens |
| 10556     | ribonuclease P/MRP 30kDa subunit                                                                     | Homo sapiens |
| 1642      | damage-specific DNA binding protein 1, 127kDa                                                        | Homo sapiens |
| 3134      | major histocompatibility complex, class I, F                                                         | Homo sapiens |
| 55026     | family with sequence similarity 70, member A                                                         | Homo sapiens |
| 57551     | TAO kinase 1                                                                                         | Homo sapiens |
| 4904      | Y box binding protein 1                                                                              | Homo sapiens |
| 125144    | chromosome 17 open reading frame 45                                                                  | Homo sapiens |
| 63893     | ubiquitin-conjugating enzyme E20                                                                     | Homo sapiens |
| 4928      | nucleoporin 98kDa                                                                                    | Homo sapiens |
| 151162    | mannosyl (alpha-1,6-)-glycoprotein beta-1,6-N-acetyl-glucosaminyltransferase; hypothetical LOC151162 | Homo sapiens |
| 4249      | mannosyl (alpha-1,6-)-glycoprotein beta-1,6-N-acetyl-glucosaminyltransferase; hypothetical LOC151162 | Homo sapiens |
| 64782     | apoptosis enhancing nuclease                                                                         | Homo sapiens |
| 4205      | myocyte enhancer factor 2A                                                                           | Homo sapiens |
| 84327     | zinc finger, BED-type containing 3                                                                   | Homo sapiens |
| 3785      | potassium voltage-gated channel, KQT-like subfamily, member 2                                        | Homo sapiens |
| 3858      | keratin 10                                                                                           | Homo sapiens |
| 10243     | gephyrin                                                                                             | Homo sapiens |
| 29887     | sorting nexin 10                                                                                     | Homo sapiens |
| 30011     | SH3-domain kinase binding protein 1                                                                  | Homo sapiens |
| 56992     | kinesin family member 15                                                                             | Homo sapiens |
| 79829     | N-acetyltransferase 11 (GCN5-related, putative)                                                      | Homo sapiens |
| 5721      | proteasome (prosome, macropain) activator subunit 2 (PA28 beta)                                      | Homo sapiens |
| 6882      | TAF11 RNA polymerase II, TATA box binding protein (TBP)-associated factor, 28kDa                     | Homo sapiens |
| 84809     | ciliary rootlet coiled-coil, rootletin-like 1                                                        | Homo sapiens |
| 54463     | family with sequence similarity 134, member B                                                        | Homo sapiens |
| 147081    | chromosome 17 open reading frame 69                                                                  | Homo sapiens |
| 4717      | NADH dehydrogenase (ubiquinone) 1, subcomplex unknown, 1, 6kDa                                       | Homo sapiens |
| 2590      | UDP-N-acetyl-alpha-D-galactosamine:polypeptide N-acetylgalactosaminyltransferase 2 (GalNAc-T2)       | Homo sapiens |
| 51122     | COMM domain containing 2                                                                             | Homo sapiens |
| 100288142 | similar to neuroblastoma breakpoint family, member 10                                                | Homo sapiens |
| 6935      | zinc finger E-box binding homeobox 1                                                                 | Homo sapiens |
| 257364    | sorting nexin 33                                                                                     | Homo sapiens |
| 22928     | selenophosphate synthetase 2                                                                         | Homo sapiens |
| 8667      | eukaryotic translation initiation factor 3, subunit H                                                | Homo sapiens |
| 80339     | patatin-like phospholipase domain containing 3                                                       | Homo sapiens |
| 23219     | F-box protein 28                                                                                     | Homo sapiens |
| 79868     | asparagine-linked glycosylation 13 homolog (S. cerevisiae)                                           | Homo sapiens |
| 4258      | microsomal glutathione S-transferase 2                                                               | Homo sapiens |
| 8266      | ubiquitin-like 4A                                                                                    | Homo sapiens |
| 23015     | golgi autoantigen, golgin subfamily a, 8B; golgi autoantigen, golgin subfamily a, 8A                 | Homo sapiens |
| 192286    | HIG1 hypoxia inducible domain family, member 2A                                                      | Homo sapiens |
| 4864      | Niemann-Pick disease, type C1                                                                        | Homo sapiens |
| 768211    | RELT-like 1                                                                                          | Homo sapiens |
| 25949     | SYF2 homolog, RNA splicing factor (S. cerevisiae)                                                    | Homo sapiens |
| 6155      | ribosomal protein L27                                                                                | Homo sapiens |
| 4173      | minichromosome maintenance complex component 4                                                       | Homo sapiens |
| 64764     | cAMP responsive element binding protein 3-like 2                                                     | Homo sapiens |
| 5710      | proteasome (prosome, macropain) 26S subunit, non-ATPase, 4                                           | Homo sapiens |
| 10916     | melanoma antigen family D, 2                                                                         | Homo sapiens |
| 3485      | insulin-like growth factor binding protein 2, 36kDa                                                  | Homo sapiens |
| 288       | ankyrin 3, node of Ranvier (ankyrin G)                                                               | Homo sapiens |

|           |                                                                                                                                                                                                                                                            |              |
|-----------|------------------------------------------------------------------------------------------------------------------------------------------------------------------------------------------------------------------------------------------------------------|--------------|
| 3841      | karyopherin alpha 5 (importin alpha 6)                                                                                                                                                                                                                     | Homo sapiens |
| 56935     | hypothetical LOC728675; chromosome 11 open reading frame 75                                                                                                                                                                                                | Homo sapiens |
| 10951     | chromobox homolog 1 (HP1 beta homolog Drosophila )                                                                                                                                                                                                         | Homo sapiens |
| 84959     | ubiquitin associated and SH3 domain containing, B                                                                                                                                                                                                          | Homo sapiens |
| 894       | cyclin D2                                                                                                                                                                                                                                                  | Homo sapiens |
| 4863      | nuclear protein, ataxia-telangiectasia locus                                                                                                                                                                                                               | Homo sapiens |
| 7024      | transcription factor CP2                                                                                                                                                                                                                                   | Homo sapiens |
| 1951      | solute carrier family 26, member 6; cadherin, EGF LAG seven-pass G-type receptor 3 (flamingo homolog, Drosophila)                                                                                                                                          | Homo sapiens |
| 130355    | chromosome 2 open reading frame 76                                                                                                                                                                                                                         | Homo sapiens |
| 57129     | mitochondrial ribosomal protein L47                                                                                                                                                                                                                        | Homo sapiens |
| 54800     | kelch-like 24 (Drosophila)                                                                                                                                                                                                                                 | Homo sapiens |
| 23421     | integrin beta 3 binding protein (beta3-endonexin)                                                                                                                                                                                                          | Homo sapiens |
| 5985      | replication factor C (activator 1) 5, 36.5kDa                                                                                                                                                                                                              | Homo sapiens |
| 1130      | lysosomal trafficking regulator                                                                                                                                                                                                                            | Homo sapiens |
| 9923      | zinc finger and BTB domain containing 40                                                                                                                                                                                                                   | Homo sapiens |
| 26589     | mitochondrial ribosomal protein L46                                                                                                                                                                                                                        | Homo sapiens |
| 57510     | exportin 5                                                                                                                                                                                                                                                 | Homo sapiens |
| 91151     | tigger transposable element derived 7                                                                                                                                                                                                                      | Homo sapiens |
| 7584      | zinc finger protein 35                                                                                                                                                                                                                                     | Homo sapiens |
| 54820     | nudE nuclear distribution gene E homolog 1 (A. nidulans)                                                                                                                                                                                                   | Homo sapiens |
| 93550     | AN1, ubiquitin-like, homolog (Xenopus laevis)                                                                                                                                                                                                              | Homo sapiens |
| 9747      | family with sequence similarity 115, member A; family with sequence similarity 115, member B (pseudogene)                                                                                                                                                  | Homo sapiens |
| 6201      | ribosomal protein S7; ribosomal protein S7 pseudogene 11; ribosomal protein S7 pseudogene 4; ribosomal protein S7 pseudogene 10                                                                                                                            | Homo sapiens |
| 5101      | protocadherin 9                                                                                                                                                                                                                                            | Homo sapiens |
| 6502      | S-phase kinase-associated protein 2 (p45)                                                                                                                                                                                                                  | Homo sapiens |
| 4176      | minichromosome maintenance complex component 7                                                                                                                                                                                                             | Homo sapiens |
| 255877    | B-cell CLL/lymphoma 6, member B (zinc finger protein)                                                                                                                                                                                                      | Homo sapiens |
| 55968     | NSFL1 (p97) cofactor (p47)                                                                                                                                                                                                                                 | Homo sapiens |
| 373156    | glutathione S-transferase kappa 1                                                                                                                                                                                                                          | Homo sapiens |
| 7475      | wingless-type MMTV integration site family, member 6                                                                                                                                                                                                       | Homo sapiens |
| 147015    | dehydrogenase/reductase (SDR family) member 13                                                                                                                                                                                                             | Homo sapiens |
| 6091      | roundabout, axon guidance receptor, homolog 1 (Drosophila); similar to roundabout 1 isoform b                                                                                                                                                              | Homo sapiens |
| 285190    | RANBP2-like and GRIP domain containing 5; RANBP2-like and GRIP domain containing 4; RANBP2-like and GRIP domain containing 3; RANBP2-like and GRIP domain containing 8; RANBP2-like and GRIP domain containing 7; RANBP2-like and GRIP domain containing 6 | Homo sapiens |
| 729540    | RANBP2-like and GRIP domain containing 5; RANBP2-like and GRIP domain containing 4; RANBP2-like and GRIP domain containing 3; RANBP2-like and GRIP domain containing 8; RANBP2-like and GRIP domain containing 7; RANBP2-like and GRIP domain containing 6 | Homo sapiens |
| 727851    | RANBP2-like and GRIP domain containing 5; RANBP2-like and GRIP domain containing 4; RANBP2-like and GRIP domain containing 3; RANBP2-like and GRIP domain containing 8; RANBP2-like and GRIP domain containing 7; RANBP2-like and GRIP domain containing 6 | Homo sapiens |
| 84220     | RANBP2-like and GRIP domain containing 5; RANBP2-like and GRIP domain containing 4; RANBP2-like and GRIP domain containing 3; RANBP2-like and GRIP domain containing 8; RANBP2-like and GRIP domain containing 7; RANBP2-like and GRIP domain containing 6 | Homo sapiens |
| 387707    | coiled-coil and C2 domain containing 2B                                                                                                                                                                                                                    | Homo sapiens |
| 5927      | lysine (K)-specific demethylase 5A                                                                                                                                                                                                                         | Homo sapiens |
| 84236     | rhomboid domain containing 1                                                                                                                                                                                                                               | Homo sapiens |
| 80775     | transmembrane protein 177                                                                                                                                                                                                                                  | Homo sapiens |
| 55916     | nuclear transport factor 2-like export factor 2                                                                                                                                                                                                            | Homo sapiens |
| 23300     | ATM interactor                                                                                                                                                                                                                                             | Homo sapiens |
| 79078     | chromosome 1 open reading frame 50                                                                                                                                                                                                                         | Homo sapiens |
| 25793     | F-box protein 7                                                                                                                                                                                                                                            | Homo sapiens |
| 133418    | embigin homolog (mouse)                                                                                                                                                                                                                                    | Homo sapiens |
| 58478     | enolase-phosphatase 1                                                                                                                                                                                                                                      | Homo sapiens |
| 51283     | bifunctional apoptosis regulator                                                                                                                                                                                                                           | Homo sapiens |
| 8933      | family with sequence similarity 127, member A                                                                                                                                                                                                              | Homo sapiens |
| 10955     | serine incorporator 3                                                                                                                                                                                                                                      | Homo sapiens |
| 966       | CD59 molecule, complement regulatory protein                                                                                                                                                                                                               | Homo sapiens |
| 153241    | centrosomal protein 120kDa                                                                                                                                                                                                                                 | Homo sapiens |
| 219654    | zinc finger, CCHC domain containing 24                                                                                                                                                                                                                     | Homo sapiens |
| 23181     | DIP2 disco-interacting protein 2 homolog A (Drosophila)                                                                                                                                                                                                    | Homo sapiens |
| 8763      | CD164 molecule, sialomucin                                                                                                                                                                                                                                 | Homo sapiens |
| 9896      | FIG4 homolog (S. cerevisiae)                                                                                                                                                                                                                               | Homo sapiens |
| 79738     | Bardet-Biedl syndrome 10                                                                                                                                                                                                                                   | Homo sapiens |
| 100131067 | hypothetical protein LOC100131067                                                                                                                                                                                                                          | Homo sapiens |
| 1831      | TSC22 domain family, member 3; GRAM domain containing 4                                                                                                                                                                                                    | Homo sapiens |
| 22998     | LIM and calponin homology domains 1                                                                                                                                                                                                                        | Homo sapiens |
| 26234     | F-box and leucine-rich repeat protein 5                                                                                                                                                                                                                    | Homo sapiens |
| 222484    | ligand of numb-protein X 2                                                                                                                                                                                                                                 | Homo sapiens |
| 3234      | homeobox D8                                                                                                                                                                                                                                                | Homo sapiens |
| 23642     | small nucleolar RNA host gene 1 (non-protein coding)                                                                                                                                                                                                       | Homo sapiens |
| 200081    | taxilin alpha                                                                                                                                                                                                                                              | Homo sapiens |
| 1629      | dihydrolipoamide branched chain transacylase E2                                                                                                                                                                                                            | Homo sapiens |

|        |                                                                                                                                 |              |
|--------|---------------------------------------------------------------------------------------------------------------------------------|--------------|
| 63877  | chromosome 10 open reading frame 84                                                                                             | Homo sapiens |
| 83439  | transcription factor 7-like 1 (T-cell specific, HMG-box)                                                                        | Homo sapiens |
| 145567 | tetratricopeptide repeat domain 7B                                                                                              | Homo sapiens |
| 6867   | transforming, acidic coiled-coil containing protein 1                                                                           | Homo sapiens |
| 55102  | ATG2 autophagy related 2 homolog B ( <i>S. cerevisiae</i> )                                                                     | Homo sapiens |
| 5283   | phosphatidylinositol glycan anchor biosynthesis, class H                                                                        | Homo sapiens |
| 22837  | COBL-like 1                                                                                                                     | Homo sapiens |
| 4674   | nucleosome assembly protein 1-like 2                                                                                            | Homo sapiens |
| 643224 | tubulin, beta 8 pseudogene                                                                                                      | Homo sapiens |
| 401115 | chromosome 4 open reading frame 48                                                                                              | Homo sapiens |
| 151963 | chromosome 3 open reading frame 59                                                                                              | Homo sapiens |
| 3068   | hepatoma-derived growth factor (high-mobility group protein 1-like)                                                             | Homo sapiens |
| 56474  | CTP synthase II                                                                                                                 | Homo sapiens |
| 23198  | proteasome (prosome, macropain) activator subunit 4                                                                             | Homo sapiens |
| 203197 | chromosome 9 open reading frame 91                                                                                              | Homo sapiens |
| 6171   | ribosomal protein L41                                                                                                           | Homo sapiens |
| 80763  | chromosome 12 open reading frame 39                                                                                             | Homo sapiens |
| 284040 | CMT1A duplicated region transcript 4                                                                                            | Homo sapiens |
| 87178  | polyribonucleotide nucleotidyltransferase 1                                                                                     | Homo sapiens |
| 10667  | phenylalanyl-tRNA synthetase 2, mitochondrial                                                                                   | Homo sapiens |
| 26269  | F-box protein 8                                                                                                                 | Homo sapiens |
| 119392 | chromosome 10 open reading frame 78                                                                                             | Homo sapiens |
| 56172  | ankylosis, progressive homolog (mouse)                                                                                          | Homo sapiens |
| 57470  | leucine rich repeat containing 47                                                                                               | Homo sapiens |
| 55005  | required for meiotic nuclear division 1 homolog ( <i>S. cerevisiae</i> )                                                        | Homo sapiens |
| 23022  | palladin, cytoskeletal associated protein                                                                                       | Homo sapiens |
| 65062  | amyotrophic lateral sclerosis 2 (juvenile) chromosome region, candidate 4                                                       | Homo sapiens |
| 51340  | crooked neck pre-mRNA splicing factor-like 1 ( <i>Drosophila</i> )                                                              | Homo sapiens |
| 11147  | HERV-H LTR-associating 3                                                                                                        | Homo sapiens |
| 372    | archain 1                                                                                                                       | Homo sapiens |
| 3292   | hydroxysteroid (17-beta) dehydrogenase 1                                                                                        | Homo sapiens |
| 8575   | protein kinase, interferon-inducible double stranded RNA dependent activator                                                    | Homo sapiens |
| 7702   | zinc finger protein 143                                                                                                         | Homo sapiens |
| 57563  | kelch-like 8 ( <i>Drosophila</i> )                                                                                              | Homo sapiens |
| 55687  | tRNA 5-methylaminomethyl-2-thiouridylate methyltransferase                                                                      | Homo sapiens |
| 26993  | A kinase (PRKA) anchor protein 8-like                                                                                           | Homo sapiens |
| 79017  | gamma-glutamyl cyclotransferase                                                                                                 | Homo sapiens |
| 57181  | solute carrier family 39 (zinc transporter), member 10                                                                          | Homo sapiens |
| 28962  | osteopetrosis associated transmembrane protein 1                                                                                | Homo sapiens |
| 84513  | phosphatidic acid phosphatase type 2 domain containing 1B                                                                       | Homo sapiens |
| 6654   | son of sevenless homolog 1 ( <i>Drosophila</i> )                                                                                | Homo sapiens |
| 10477  | ubiquitin-conjugating enzyme E2E 3 (UBC4/5 homolog, yeast)                                                                      | Homo sapiens |
| 6281   | S100 calcium binding protein A10                                                                                                | Homo sapiens |
| 1876   | E2F transcription factor 6                                                                                                      | Homo sapiens |
| 515    | ATP synthase, H <sup>+</sup> transporting, mitochondrial F0 complex, subunit B1                                                 | Homo sapiens |
| 2597   | glyceraldehyde-3-phosphate dehydrogenase-like 6; hypothetical protein LOC100133042;<br>glyceraldehyde-3-phosphate dehydrogenase | Homo sapiens |
| 54881  | testis expressed 10                                                                                                             | Homo sapiens |
| 26050  | SLIT and NTRK-like family, member 5                                                                                             | Homo sapiens |
| 9836   | leucine carboxyl methyltransferase 2                                                                                            | Homo sapiens |
| 6157   | ribosomal protein L27a                                                                                                          | Homo sapiens |
| 3658   | iron-responsive element binding protein 2                                                                                       | Homo sapiens |
| 92312  | mex-3 homolog A ( <i>C. elegans</i> )                                                                                           | Homo sapiens |
| 22838  | ring finger protein 44                                                                                                          | Homo sapiens |
| 8802   | succinate-CoA ligase, alpha subunit                                                                                             | Homo sapiens |
| 9467   | SH3-domain binding protein 5 (BTK-associated)                                                                                   | Homo sapiens |
| 201627 | family with sequence similarity 116, member A                                                                                   | Homo sapiens |
| 63935  | PDX1 C-terminal inhibiting factor 1                                                                                             | Homo sapiens |
| 7319   | ubiquitin-conjugating enzyme E2A (RAD6 homolog)                                                                                 | Homo sapiens |
| 9581   | prolyl endopeptidase-like                                                                                                       | Homo sapiens |
| 2730   | glutamate-cysteine ligase, modifier subunit                                                                                     | Homo sapiens |
| 10016  | aryl-hydrocarbon receptor repressor; programmed cell death 6                                                                    | Homo sapiens |
| 57491  | aryl-hydrocarbon receptor repressor; programmed cell death 6                                                                    | Homo sapiens |
| 64853  | hypothetical LOC653631; hypothetical LOC646050; hypothetical LOC646890; axin interactor,<br>dorsalization associated            | Homo sapiens |
| 8313   | axin 2                                                                                                                          | Homo sapiens |
| 53342  | interleukin 17D                                                                                                                 | Homo sapiens |
| 23378  | ribosomal RNA processing 8, methyltransferase, homolog (yeast)                                                                  | Homo sapiens |
| 28971  | chromosome 11 open reading frame 67                                                                                             | Homo sapiens |
| 4248   | mannosyl (beta-1,4-)-glycoprotein beta-1,4-N-acetylglucosaminyltransferase                                                      | Homo sapiens |
| 200916 | ribosomal protein L22-like 1                                                                                                    | Homo sapiens |
| 25816  | tumor necrosis factor, alpha-induced protein 8                                                                                  | Homo sapiens |
| 550    | ancient ubiquitous protein 1                                                                                                    | Homo sapiens |
| 51466  | Enah/Vasp-like                                                                                                                  | Homo sapiens |
| 11325  | DEAD (Asp-Glu-Ala-Asp) box polypeptide 42                                                                                       | Homo sapiens |
| 11120  | butyrophilin, subfamily 2, member A1                                                                                            | Homo sapiens |
| 65243  | zinc finger protein 643                                                                                                         | Homo sapiens |

|        |                                                                                                      |              |
|--------|------------------------------------------------------------------------------------------------------|--------------|
| 54976  | chromosome 20 open reading frame 27                                                                  | Homo sapiens |
| 102    | ADAM metallopeptidase domain 10                                                                      | Homo sapiens |
| 84263  | hydroxysteroid dehydrogenase like 2                                                                  | Homo sapiens |
| 55030  | F-box protein 34                                                                                     | Homo sapiens |
| 9181   | Rho/Rac guanine nucleotide exchange factor (GEF) 2                                                   | Homo sapiens |
| 7374   | uracil-DNA glycosylase                                                                               | Homo sapiens |
| 84306  | programmed cell death 2-like                                                                         | Homo sapiens |
| 81618  | integral membrane protein 2C                                                                         | Homo sapiens |
| 10494  | serine/threonine kinase 25 (STE20 homolog, yeast)                                                    | Homo sapiens |
| 7415   | valosin-containing protein                                                                           | Homo sapiens |
| 23043  | TRAF2 and NCK interacting kinase                                                                     | Homo sapiens |
| 57542  | kelch domain containing 5                                                                            | Homo sapiens |
| 51714  | selenoprotein T; similar to Selenoprotein T                                                          | Homo sapiens |
| 10250  | serine/arginine repetitive matrix 1                                                                  | Homo sapiens |
| 55173  | mitochondrial ribosomal protein S10                                                                  | Homo sapiens |
| 63977  | PR domain containing 15                                                                              | Homo sapiens |
| 200895 | dihydrofolate reductase-like 1                                                                       | Homo sapiens |
| 10952  | Sec61 beta subunit                                                                                   | Homo sapiens |
| 10564  | ADP-ribosylation factor guanine nucleotide-exchange factor 2 (brefeldin A-inhibited)                 | Homo sapiens |
| 55000  | taurine upregulated 1 (non-protein coding)                                                           | Homo sapiens |
| 4139   | MAP/microtubule affinity-regulating kinase 1                                                         | Homo sapiens |
| 669    | 2,3-bisphosphoglycerate mutase                                                                       | Homo sapiens |
| 81542  | thioredoxin-related transmembrane protein 1                                                          | Homo sapiens |
| 26152  | zinc finger protein 337                                                                              | Homo sapiens |
| 140838 | N-acetylneuraminic acid phosphatase                                                                  | Homo sapiens |
| 10621  | polymerase (RNA) III (DNA directed) polypeptide F, 39 kDa                                            | Homo sapiens |
| 254887 | zinc finger, DHHC-type containing 23                                                                 | Homo sapiens |
| 11315  | Parkinson disease (autosomal recessive, early onset) 7                                               | Homo sapiens |
| 118433 | ribosomal protein L23a pseudogene 7                                                                  | Homo sapiens |
| 5692   | proteasome (prosome, macropain) subunit, beta type, 4                                                | Homo sapiens |
| 161823 | adenosine deaminase-like                                                                             | Homo sapiens |
| 9401   | RecQ protein-like 4                                                                                  | Homo sapiens |
| 145853 | chromosome 15 open reading frame 61                                                                  | Homo sapiens |
| 4696   | NADH dehydrogenase (ubiquinone) 1 alpha subcomplex, 3, 9kDa                                          | Homo sapiens |
| 5563   | protein kinase, AMP-activated, alpha 2 catalytic subunit                                             | Homo sapiens |
| 5127   | PCTAIRE protein kinase 1                                                                             | Homo sapiens |
| 157313 | cell division cycle associated 2                                                                     | Homo sapiens |
| 55628  | zinc finger protein 407                                                                              | Homo sapiens |
| 51293  | CD320 molecule                                                                                       | Homo sapiens |
| 975    | CD81 molecule                                                                                        | Homo sapiens |
| 10730  | YME1-like 1 (S. cerevisiae)                                                                          | Homo sapiens |
| 122553 | trafficking protein particle complex 6B                                                              | Homo sapiens |
| 23532  | preferentially expressed antigen in melanoma                                                         | Homo sapiens |
| 9258   | malignant fibrous histiocytoma amplified sequence 1                                                  | Homo sapiens |
| 23169  | solute carrier family 35 (UDP-glucuronic acid/UDP-N-acetylgalactosamine dual transporter), member D1 | Homo sapiens |
| 23180  | raftlin, lipid raft linker 1                                                                         | Homo sapiens |
| 4502   | metallothionein 2A                                                                                   | Homo sapiens |
| 84128  | WD repeat domain 75                                                                                  | Homo sapiens |
| 390354 | ribosomal protein L18a pseudogene 3                                                                  | Homo sapiens |
| 56829  | zinc finger CCCH-type, antiviral 1                                                                   | Homo sapiens |
| 51174  | tubulin, delta 1                                                                                     | Homo sapiens |
| 7525   | v-yes-1 Yamaguchi sarcoma viral oncogene homolog 1                                                   | Homo sapiens |
| 51386  | eukaryotic translation initiation factor 3, subunit L                                                | Homo sapiens |
| 9575   | clock homolog (mouse)                                                                                | Homo sapiens |
| 55093  | WDYHV motif containing 1                                                                             | Homo sapiens |
| 3106   | major histocompatibility complex, class I, C; major histocompatibility complex, class I, B           | Homo sapiens |
| 3107   | major histocompatibility complex, class I, C; major histocompatibility complex, class I, B           | Homo sapiens |
| 55277  | FGGY carbohydrate kinase domain containing                                                           | Homo sapiens |
| 11004  | kinesin family member 2C                                                                             | Homo sapiens |
| 1627   | drebrin 1                                                                                            | Homo sapiens |
| 23312  | Dmx-like 2                                                                                           | Homo sapiens |
| 79441  | HAUS augmin-like complex, subunit 3                                                                  | Homo sapiens |
| 65267  | WNK lysine deficient protein kinase 3                                                                | Homo sapiens |
| 9817   | kelch-like ECH-associated protein 1                                                                  | Homo sapiens |
| 126298 | immunity-related GTPase family, Q                                                                    | Homo sapiens |
| 51082  | polymerase (RNA) I polypeptide D, 16kDa                                                              | Homo sapiens |
| 1147   | conserved helix-loop-helix ubiquitous kinase                                                         | Homo sapiens |
| 10644  | insulin-like growth factor 2 mRNA binding protein 2                                                  | Homo sapiens |
| 6941   | transcription factor 19                                                                              | Homo sapiens |
| 9616   | ring finger protein 7                                                                                | Homo sapiens |
| 51247  | poly(A) binding protein interacting protein 2                                                        | Homo sapiens |
| 6878   | TAF6 RNA polymerase II, TATA box binding protein (TBP)-associated factor, 80kDa                      | Homo sapiens |
| 121457 | IKK interacting protein                                                                              | Homo sapiens |
| 57168  | aspartate beta-hydroxylase domain containing 2                                                       | Homo sapiens |

|           |                                                                                                               |              |
|-----------|---------------------------------------------------------------------------------------------------------------|--------------|
| 51691     | LSM8 homolog, U6 small nuclear RNA associated ( <i>S. cerevisiae</i> )                                        | Homo sapiens |
| 55342     | spermatid perinuclear RNA binding protein                                                                     | Homo sapiens |
| 9936      | CD302 molecule; lymphocyte antigen 75                                                                         | Homo sapiens |
| 7004      | TEA domain family member 4                                                                                    | Homo sapiens |
| 2975      | general transcription factor IIIC, polypeptide 1, alpha 220kDa                                                | Homo sapiens |
| 552900    | bolA homolog 2 ( <i>E. coli</i> ); bolA homolog 2B ( <i>E. coli</i> )                                         | Homo sapiens |
| 654483    | bolA homolog 2 ( <i>E. coli</i> ); bolA homolog 2B ( <i>E. coli</i> )                                         | Homo sapiens |
| 91833     | WD repeat domain 20                                                                                           | Homo sapiens |
| 57590     | WD repeat and FYVE domain containing 1                                                                        | Homo sapiens |
| 10010     | TRAF family member-associated NFKB activator                                                                  | Homo sapiens |
| 121665    | signal peptide peptidase 3                                                                                    | Homo sapiens |
| 5170      | 3-phosphoinositide dependent protein kinase-1                                                                 | Homo sapiens |
| 9861      | proteasome (prosome, macropain) 26S subunit, non-ATPase, 6                                                    | Homo sapiens |
| 57520     | HECT, C2 and WW domain containing E3 ubiquitin protein ligase 2                                               | Homo sapiens |
| 112885    | PHD finger protein 21B                                                                                        | Homo sapiens |
| 9672      | syndecan 3                                                                                                    | Homo sapiens |
| 51768     | transmembrane 7 superfamily member 3                                                                          | Homo sapiens |
| 5110      | protein-L-isoaspartate (D-aspartate) O-methyltransferase                                                      | Homo sapiens |
| 51105     | PHD finger protein 20-like 1                                                                                  | Homo sapiens |
| 1798      | dolichyl-phosphate (UDP-N-acetylglucosamine) N-acetylglucosaminophosphotransferase 1 (GlcNAc-1-P transferase) | Homo sapiens |
| 5884      | RAD17 homolog ( <i>S. pombe</i> )                                                                             | Homo sapiens |
| 55049     | chromosome 19 open reading frame 60                                                                           | Homo sapiens |
| 9583      | ectonucleoside triphosphate diphosphohydrolase 4                                                              | Homo sapiens |
| 11338     | U2 small nuclear RNA auxiliary factor 2                                                                       | Homo sapiens |
| 2823      | glycoprotein M6A                                                                                              | Homo sapiens |
| 10567     | Rab acceptor 1 (prenylated)                                                                                   | Homo sapiens |
| 5325      | pleiomorphic adenoma gene-like 1                                                                              | Homo sapiens |
| 55255     | WD repeat domain 41                                                                                           | Homo sapiens |
| 80055     | post-GPI attachment to proteins 1                                                                             | Homo sapiens |
| 468       | activating transcription factor 4 (tax-responsive enhancer element B67); activating transcription factor 4C   | Homo sapiens |
| 9706      | unc-51-like kinase 2 ( <i>C. elegans</i> )                                                                    | Homo sapiens |
| 373863    | dead end homolog 1 (zebrafish); similar to dead end homolog 1                                                 | Homo sapiens |
| 6272      | sortilin 1                                                                                                    | Homo sapiens |
| 7699      | zinc finger protein 140                                                                                       | Homo sapiens |
| 23119     | hypermethylated in cancer 2                                                                                   | Homo sapiens |
| 64318     | nucleolar complex associated 3 homolog ( <i>S. cerevisiae</i> )                                               | Homo sapiens |
| 7311      | ubiquitin A-52 residue ribosomal protein fusion product 1                                                     | Homo sapiens |
| 6835      | surfeit 2                                                                                                     | Homo sapiens |
| 79709     | glycosyltransferase 25 domain containing 1                                                                    | Homo sapiens |
| 57045     | twisted gastrulation homolog 1 ( <i>Drosophila</i> )                                                          | Homo sapiens |
| 311       | annexin A11                                                                                                   | Homo sapiens |
| 1024      | cyclin-dependent kinase 8                                                                                     | Homo sapiens |
| 25927     | cannabinoid receptor interacting protein 1                                                                    | Homo sapiens |
| 257152    | hypothetical protein LOC257152                                                                                | Homo sapiens |
| 84996     | chromosome 21 open reading frame 119                                                                          | Homo sapiens |
| 57178     | zinc finger, MIZ-type containing 1                                                                            | Homo sapiens |
| 147339    | chromosome 18 open reading frame 25                                                                           | Homo sapiens |
| 29100     | transmembrane protein 208                                                                                     | Homo sapiens |
| 9107      | myotubularin related protein 6                                                                                | Homo sapiens |
| 9391      | cytosolic iron-sulfur protein assembly 1 homolog ( <i>S. cerevisiae</i> )                                     | Homo sapiens |
| 6565      | solute carrier family 15 (H+/peptide transporter), member 2                                                   | Homo sapiens |
| 64327     | limb region 1 homolog (mouse)                                                                                 | Homo sapiens |
| 6132      | ribosomal protein L8; ribosomal protein L8 pseudogene 2                                                       | Homo sapiens |
| 56683     | chromosome 21 open reading frame 59                                                                           | Homo sapiens |
| 7016      | testis-specific kinase 1                                                                                      | Homo sapiens |
| 6451      | SH3 domain binding glutamic acid-rich protein like                                                            | Homo sapiens |
| 91750     | lin-52 homolog ( <i>C. elegans</i> )                                                                          | Homo sapiens |
| 10239     | adaptor-related protein complex 3, sigma 2 subunit                                                            | Homo sapiens |
| 80862     | non-protein coding RNA 171; HLA complex P5 pseudogene 10                                                      | Homo sapiens |
| 26130     | GTPase activating protein and VPS9 domains 1                                                                  | Homo sapiens |
| 7469      | Wolf-Hirschhorn syndrome candidate 2                                                                          | Homo sapiens |
| 10572     | SIVAL, apoptosis-inducing factor                                                                              | Homo sapiens |
| 57693     | zinc finger protein 317                                                                                       | Homo sapiens |
| 389362    | proteasome (prosome, macropain) assembly chaperone 4                                                          | Homo sapiens |
| 3646      | eukaryotic translation initiation factor 3, subunit E                                                         | Homo sapiens |
| 27161     | eukaryotic translation initiation factor 2C, 2                                                                | Homo sapiens |
| 6809      | syntaxin 3                                                                                                    | Homo sapiens |
| 387882    | chromosome 12 open reading frame 75                                                                           | Homo sapiens |
| 29899     | G-protein signaling modulator 2 (AGS3-like, <i>C. elegans</i> )                                               | Homo sapiens |
| 2820      | glycerol-3-phosphate dehydrogenase 2 (mitochondrial)                                                          | Homo sapiens |
| 1730      | diaphanous homolog 2 ( <i>Drosophila</i> )                                                                    | Homo sapiens |
| 1616      | death-domain associated protein                                                                               | Homo sapiens |
| 5594      | mitogen-activated protein kinase 1                                                                            | Homo sapiens |
| 100289678 | similar to zinc finger protein 30                                                                             | Homo sapiens |
| 5264      | phytanoyl-CoA 2-hydroxylase                                                                                   | Homo sapiens |

|        |                                                                                                   |              |
|--------|---------------------------------------------------------------------------------------------------|--------------|
| 54516  | mitochondrial translational release factor 1-like                                                 | Homo sapiens |
| 284385 | hypothetical protein LOC284385                                                                    | Homo sapiens |
| 55209  | SET domain containing 5                                                                           | Homo sapiens |
| 25963  | transmembrane protein 87A                                                                         | Homo sapiens |
| 10279  | protease, serine, 16 (thymus)                                                                     | Homo sapiens |
| 51000  | solute carrier family 35, member B3                                                               | Homo sapiens |
| 4501   | metallothionein 1X                                                                                | Homo sapiens |
| 5052   | peroxiredoxin 1                                                                                   | Homo sapiens |
| 10765  | similar to Jumonji, AT rich interactive domain 1B (RBP2-like); lysine (K)-specific demethylase 5B | Homo sapiens |
| 116541 | mitochondrial ribosomal protein L54                                                               | Homo sapiens |
| 6834   | surfeit 1                                                                                         | Homo sapiens |
| 5335   | phospholipase C, gamma 1                                                                          | Homo sapiens |
| 5216   | profilin 1                                                                                        | Homo sapiens |
| 81602  | cytidine and dCMP deaminase domain containing 1                                                   | Homo sapiens |
| 51019  | coiled-coil domain containing 53                                                                  | Homo sapiens |
| 359845 | hypothetical protein LOC100133632; family with sequence similarity 101, member B                  | Homo sapiens |
| 285527 | FRY-like                                                                                          | Homo sapiens |
| 80347  | Coenzyme A synthase                                                                               | Homo sapiens |
| 84243  | zinc finger, DHHC-type containing 18                                                              | Homo sapiens |
| 55284  | ubiquitin-conjugating enzyme E2W (putative)                                                       | Homo sapiens |
| 54442  | potassium channel tetramerisation domain containing 5                                             | Homo sapiens |
| 51099  | abhydrolase domain containing 5                                                                   | Homo sapiens |
| 64219  | praja ring finger 1                                                                               | Homo sapiens |
| 987    | LPS-responsive vesicle trafficking, beach and anchor containing                                   | Homo sapiens |
| 58515  | selenoprotein K; similar to HSPC297                                                               | Homo sapiens |
| 285753 | chromosome 6 open reading frame 182                                                               | Homo sapiens |
| 2530   | fucosyltransferase 8 (alpha (1,6) fucosyltransferase)                                             | Homo sapiens |
| 7280   | tubulin, beta 2A                                                                                  | Homo sapiens |
| 9319   | thyroid hormone receptor interactor 13                                                            | Homo sapiens |
| 9330   | general transcription factor IIIC, polypeptide 3, 102kDa                                          | Homo sapiens |
| 84317  | coiled-coil domain containing 115                                                                 | Homo sapiens |
| 54993  | zinc finger and SCAN domain containing 2                                                          | Homo sapiens |
| 4690   | NCK adaptor protein 1                                                                             | Homo sapiens |
| 1993   | ELAV (embryonic lethal, abnormal vision, Drosophila)-like 2 (Hu antigen B)                        | Homo sapiens |
| 10989  | inner membrane protein, mitochondrial (mitofilin)                                                 | Homo sapiens |
| 55970  | guanine nucleotide binding protein (G protein), gamma 12                                          | Homo sapiens |
| 254428 | solute carrier family 41, member 1                                                                | Homo sapiens |
| 3918   | laminin, gamma 2                                                                                  | Homo sapiens |
| 9331   | UDP-Gal:betaGlcNAc beta 1,4- galactosyltransferase, polypeptide 6                                 | Homo sapiens |
| 23557  | SNAP-associated protein                                                                           | Homo sapiens |
| 10393  | anaphase promoting complex subunit 10; anaphase promoting complex subunit 10 pseudogene           | Homo sapiens |
| 56993  | translocase of outer mitochondrial membrane 22 homolog (yeast)                                    | Homo sapiens |
| 9043   | sperm associated antigen 9                                                                        | Homo sapiens |
| 54965  | phosphatidylinositol glycan anchor biosynthesis, class X                                          | Homo sapiens |
| 9189   | zinc finger, BED-type containing 1                                                                | Homo sapiens |
| 51634  | RNA binding motif protein, X-linked 2                                                             | Homo sapiens |
| 5727   | patched homolog 1 (Drosophila)                                                                    | Homo sapiens |
| 92610  | TRAF-interacting protein with forkhead-associated domain                                          | Homo sapiens |
| 84909  | chromosome 9 open reading frame 3                                                                 | Homo sapiens |
| 308    | annexin A5                                                                                        | Homo sapiens |
| 51016  | family with sequence similarity 158, member A                                                     | Homo sapiens |
| 2932   | glycogen synthase kinase 3 beta                                                                   | Homo sapiens |
| 23597  | acyl-CoA thioesterase 9                                                                           | Homo sapiens |
| 5587   | protein kinase D1                                                                                 | Homo sapiens |
| 23161  | sorting nexin 13                                                                                  | Homo sapiens |
| 138162 | chromosome 9 open reading frame 116                                                               | Homo sapiens |
| 152518 | nuclear transcription factor, X-box binding-like 1                                                | Homo sapiens |
| 64756  | ATP synthase mitochondrial F1 complex assembly factor 1                                           | Homo sapiens |
| 64802  | nicotinamide nucleotide adenylyltransferase 1                                                     | Homo sapiens |
| 200205 | chromosome 1 open reading frame 69                                                                | Homo sapiens |
| 57380  | MRS2 magnesium homeostasis factor homolog (S. cerevisiae)                                         | Homo sapiens |
| 9962   | solute carrier family 23 (nucleobase transporters), member 2                                      | Homo sapiens |
| 84657  | chromosome 3 open reading frame 42                                                                | Homo sapiens |
| 57460  | protein phosphatase 1H (PP2C domain containing)                                                   | Homo sapiens |
| 6045   | ring finger protein 2                                                                             | Homo sapiens |
| 8859   | serine/threonine kinase 19                                                                        | Homo sapiens |
| 23150  | FERM domain containing 4B                                                                         | Homo sapiens |
| 6597   | SWI/SNF related, matrix associated, actin dependent regulator of chromatin, subfamily a, member 4 | Homo sapiens |
| 152185 | coiled-coil domain containing 52                                                                  | Homo sapiens |
| 1317   | solute carrier family 31 (copper transporters), member 1                                          | Homo sapiens |
| 57406  | abhydrolase domain containing 6                                                                   | Homo sapiens |
| 9453   | geranylgeranyl diphosphate synthase 1                                                             | Homo sapiens |
| 22955  | sex comb on midleg homolog 1 (Drosophila)                                                         | Homo sapiens |
| 90624  | Lyrn7 homolog (mouse)                                                                             | Homo sapiens |
| 1477   | cleavage stimulation factor, 3' pre-RNA, subunit 1, 50kDa                                         | Homo sapiens |



|           |                                                                                                                                                                                                                                                                                                                                                                                                                                                                                |              |
|-----------|--------------------------------------------------------------------------------------------------------------------------------------------------------------------------------------------------------------------------------------------------------------------------------------------------------------------------------------------------------------------------------------------------------------------------------------------------------------------------------|--------------|
| 9353      | slit homolog 2 ( <i>Drosophila</i> )                                                                                                                                                                                                                                                                                                                                                                                                                                           | Homo sapiens |
| 23389     | mediator complex subunit 13-like                                                                                                                                                                                                                                                                                                                                                                                                                                               | Homo sapiens |
| 3912      | laminin, beta 1                                                                                                                                                                                                                                                                                                                                                                                                                                                                | Homo sapiens |
| 51585     | PCF11, cleavage and polyadenylation factor subunit, homolog ( <i>S. cerevisiae</i> )                                                                                                                                                                                                                                                                                                                                                                                           | Homo sapiens |
| 100131607 | similar to ATPase, H <sup>+</sup> transporting, lysosomal 14kD, V1 subunit F                                                                                                                                                                                                                                                                                                                                                                                                   | Homo sapiens |
| 6231      | ribosomal protein S26 pseudogene 38; ribosomal protein S26 pseudogene 39; ribosomal protein S26 pseudogene 35; ribosomal protein S26 pseudogene 31; ribosomal protein S26 pseudogene 20; ribosomal protein S26 pseudogene 54; ribosomal protein S26 pseudogene 2; ribosomal protein S26 pseudogene 53; ribosomal protein S26 pseudogene 25; ribosomal protein S26 pseudogene 50; ribosomal protein S26 pseudogene 6; ribosomal protein S26 pseudogene 8; ribosomal protein S26 | Homo sapiens |
| 54512     | exosome component 4                                                                                                                                                                                                                                                                                                                                                                                                                                                            | Homo sapiens |
| 4144      | methionine adenosyltransferase II, alpha                                                                                                                                                                                                                                                                                                                                                                                                                                       | Homo sapiens |
| 26230     | T-cell lymphoma invasion and metastasis 2                                                                                                                                                                                                                                                                                                                                                                                                                                      | Homo sapiens |
| 8501      | solute carrier family 43, member 1                                                                                                                                                                                                                                                                                                                                                                                                                                             | Homo sapiens |
| 389831    | hypothetical gene supported by AL713796                                                                                                                                                                                                                                                                                                                                                                                                                                        | Homo sapiens |
| 90120     | chromosome 9 open reading frame 69                                                                                                                                                                                                                                                                                                                                                                                                                                             | Homo sapiens |
| 8518      | inhibitor of kappa light polypeptide gene enhancer in B-cells, kinase complex-associated protein                                                                                                                                                                                                                                                                                                                                                                               | Homo sapiens |
| 57169     | zinc finger, NFX1-type containing 1                                                                                                                                                                                                                                                                                                                                                                                                                                            | Homo sapiens |
| 51335     | neugrin, neurite outgrowth associated                                                                                                                                                                                                                                                                                                                                                                                                                                          | Homo sapiens |
| 283951    | chromosome 16 open reading frame 91                                                                                                                                                                                                                                                                                                                                                                                                                                            | Homo sapiens |
| 6605      | SWI/SNF related, matrix associated, actin dependent regulator of chromatin, subfamily e, member 1                                                                                                                                                                                                                                                                                                                                                                              | Homo sapiens |
| 114991    | zinc finger protein 618                                                                                                                                                                                                                                                                                                                                                                                                                                                        | Homo sapiens |
| 5910      | RAP1, GTP-GDP dissociation stimulator 1                                                                                                                                                                                                                                                                                                                                                                                                                                        | Homo sapiens |
| 84072     | HORMA domain containing 1                                                                                                                                                                                                                                                                                                                                                                                                                                                      | Homo sapiens |
| 158960    | hypothetical protein BC009467                                                                                                                                                                                                                                                                                                                                                                                                                                                  | Homo sapiens |
| 708       | complement component 1, q subcomponent binding protein                                                                                                                                                                                                                                                                                                                                                                                                                         | Homo sapiens |
| 388753    | chromosome 1 open reading frame 31                                                                                                                                                                                                                                                                                                                                                                                                                                             | Homo sapiens |
| 9446      | glutathione S-transferase omega 1                                                                                                                                                                                                                                                                                                                                                                                                                                              | Homo sapiens |
| 991       | cell division cycle 20 homolog ( <i>S. cerevisiae</i> )                                                                                                                                                                                                                                                                                                                                                                                                                        | Homo sapiens |
| 10771     | zinc finger, MYND domain containing 11                                                                                                                                                                                                                                                                                                                                                                                                                                         | Homo sapiens |
| 8672      | eukaryotic translation initiation factor 4 gamma, 3                                                                                                                                                                                                                                                                                                                                                                                                                            | Homo sapiens |
| 441259    | PMS2 postmeiotic segregation increased 2 ( <i>S. cerevisiae</i> )-like                                                                                                                                                                                                                                                                                                                                                                                                         | Homo sapiens |
| 1161      | excision repair cross-complementing rodent repair deficiency, complementation group 8                                                                                                                                                                                                                                                                                                                                                                                          | Homo sapiens |
| 51021     | mitochondrial ribosomal protein S16                                                                                                                                                                                                                                                                                                                                                                                                                                            | Homo sapiens |
| 10276     | neuroepithelial cell transforming 1                                                                                                                                                                                                                                                                                                                                                                                                                                            | Homo sapiens |
| 9867      | praja ring finger 2                                                                                                                                                                                                                                                                                                                                                                                                                                                            | Homo sapiens |
| 23429     | RING1 and YY1 binding protein                                                                                                                                                                                                                                                                                                                                                                                                                                                  | Homo sapiens |
| 1778      | dynein, cytoplasmic 1, heavy chain 1                                                                                                                                                                                                                                                                                                                                                                                                                                           | Homo sapiens |
| 996       | cell division cycle 27 homolog ( <i>S. cerevisiae</i> )                                                                                                                                                                                                                                                                                                                                                                                                                        | Homo sapiens |
| 51647     | family with sequence similarity 96, member B                                                                                                                                                                                                                                                                                                                                                                                                                                   | Homo sapiens |
| 6733      | SFRS protein kinase 2                                                                                                                                                                                                                                                                                                                                                                                                                                                          | Homo sapiens |
| 57708     | mesoderm induction early response 1 homolog ( <i>Xenopus laevis</i> )                                                                                                                                                                                                                                                                                                                                                                                                          | Homo sapiens |
| 81790     | ring finger protein 170                                                                                                                                                                                                                                                                                                                                                                                                                                                        | Homo sapiens |
| 27230     | stress-associated endoplasmic reticulum protein 1                                                                                                                                                                                                                                                                                                                                                                                                                              | Homo sapiens |
| 27244     | sestrin 1                                                                                                                                                                                                                                                                                                                                                                                                                                                                      | Homo sapiens |
| 401522    | hypothetical LOC401522                                                                                                                                                                                                                                                                                                                                                                                                                                                         | Homo sapiens |
| 79269     | WD repeat domain 32                                                                                                                                                                                                                                                                                                                                                                                                                                                            | Homo sapiens |
| 92        | activin A receptor, type IIA                                                                                                                                                                                                                                                                                                                                                                                                                                                   | Homo sapiens |
| 5352      | procollagen-lysine, 2-oxoglutarate 5-dioxygenase 2                                                                                                                                                                                                                                                                                                                                                                                                                             | Homo sapiens |
| 51665     | ankyrin repeat and SOCS box-containing 1                                                                                                                                                                                                                                                                                                                                                                                                                                       | Homo sapiens |
| 84641     | hippocampus abundant transcript-like 1                                                                                                                                                                                                                                                                                                                                                                                                                                         | Homo sapiens |
| 112950    | mediator complex subunit 8                                                                                                                                                                                                                                                                                                                                                                                                                                                     | Homo sapiens |
| 51187     | ribosomal L24 domain containing 1; similar to ribosomal protein L24-like                                                                                                                                                                                                                                                                                                                                                                                                       | Homo sapiens |
| 54989     | zinc finger protein 770                                                                                                                                                                                                                                                                                                                                                                                                                                                        | Homo sapiens |
| 54953     | chromosome 1 open reading frame 27                                                                                                                                                                                                                                                                                                                                                                                                                                             | Homo sapiens |
| 51588     | protein inhibitor of activated STAT, 4                                                                                                                                                                                                                                                                                                                                                                                                                                         | Homo sapiens |
| 27352     | small G protein signaling modulator 3                                                                                                                                                                                                                                                                                                                                                                                                                                          | Homo sapiens |
| 6999      | tryptophan 2,3-dioxygenase                                                                                                                                                                                                                                                                                                                                                                                                                                                     | Homo sapiens |
| 258010    | small VCP/p97-interacting protein                                                                                                                                                                                                                                                                                                                                                                                                                                              | Homo sapiens |
| 57149     | LYR motif containing 1                                                                                                                                                                                                                                                                                                                                                                                                                                                         | Homo sapiens |
| 9100      | ubiquitin specific peptidase 10                                                                                                                                                                                                                                                                                                                                                                                                                                                | Homo sapiens |
| 22995     | centrosomal protein 152kDa                                                                                                                                                                                                                                                                                                                                                                                                                                                     | Homo sapiens |
| 8202      | nuclear receptor coactivator 3                                                                                                                                                                                                                                                                                                                                                                                                                                                 | Homo sapiens |
| 203       | adenylate kinase 1                                                                                                                                                                                                                                                                                                                                                                                                                                                             | Homo sapiens |
| 79691     | queuine tRNA-ribosyltransferase domain containing 1                                                                                                                                                                                                                                                                                                                                                                                                                            | Homo sapiens |
| 54806     | Abelson helper integration site 1                                                                                                                                                                                                                                                                                                                                                                                                                                              | Homo sapiens |
| 2824      | glycoprotein M6B                                                                                                                                                                                                                                                                                                                                                                                                                                                               | Homo sapiens |
| 27349     | malonyl CoA:ACP acyltransferase (mitochondrial)                                                                                                                                                                                                                                                                                                                                                                                                                                | Homo sapiens |
| 91582     | ribosomal protein S19 binding protein 1                                                                                                                                                                                                                                                                                                                                                                                                                                        | Homo sapiens |
| 195828    | zinc finger protein 367                                                                                                                                                                                                                                                                                                                                                                                                                                                        | Homo sapiens |
| 79745     | CAP-GLY domain containing linker protein family, member 4                                                                                                                                                                                                                                                                                                                                                                                                                      | Homo sapiens |
| 84078     | kelch repeat and BTB (POZ) domain containing 7                                                                                                                                                                                                                                                                                                                                                                                                                                 | Homo sapiens |
| 114826    | SET and MYND domain containing 4                                                                                                                                                                                                                                                                                                                                                                                                                                               | Homo sapiens |
| 200845    | potassium channel tetramerisation domain containing 6                                                                                                                                                                                                                                                                                                                                                                                                                          | Homo sapiens |

|        |                                                                                                               |              |
|--------|---------------------------------------------------------------------------------------------------------------|--------------|
| 285382 | chromosome 3 open reading frame 70                                                                            | Homo sapiens |
| 50808  | adenylate kinase 3                                                                                            | Homo sapiens |
| 6197   | ribosomal protein S6 kinase, 90kDa, polypeptide 3                                                             | Homo sapiens |
| 55247  | nei endonuclease VIII-like 3 (E. coli)                                                                        | Homo sapiens |
| 205    | adenylate kinase 3-like 2; adenylate kinase 3-like 1                                                          | Homo sapiens |
| 57616  | teashirt zinc finger homeobox 3                                                                               | Homo sapiens |
| 84313  | vacuolar protein sorting 25 homolog (S. cerevisiae)                                                           | Homo sapiens |
| 55034  | molybdenum cofactor sulfurase                                                                                 | Homo sapiens |
| 25941  | chromosome 18 open reading frame 10                                                                           | Homo sapiens |
| 9110   | myotubularin related protein 4                                                                                | Homo sapiens |
| 55227  | leucine rich repeat containing 1                                                                              | Homo sapiens |
| 286527 | thymosin beta 15a; thymosin beta 15B                                                                          | Homo sapiens |
| 11013  | thymosin beta 15a; thymosin beta 15B                                                                          | Homo sapiens |
| 727849 | similar to cis-Golgi matrix protein GM130                                                                     | Homo sapiens |
| 728855 | hypothetical LOC728855                                                                                        | Homo sapiens |
| 11017  | small nuclear ribonucleoprotein 27kDa (U4/U6.U5)                                                              | Homo sapiens |
| 201292 | tripartite motif-containing 65                                                                                | Homo sapiens |
| 56951  | chromosome 5 open reading frame 15                                                                            | Homo sapiens |
| 3693   | integrin, beta 5                                                                                              | Homo sapiens |
| 55269  | paraspeckle component 1; paraspeckle protein 1 pseudogene                                                     | Homo sapiens |
| 57553  | microtubule associated monooxygenase, calponin and LIM domain containing 3                                    | Homo sapiens |
| 22990  | pecanex homolog (Drosophila)                                                                                  | Homo sapiens |
| 2060   | epidermal growth factor receptor pathway substrate 15                                                         | Homo sapiens |
| 642852 | hypothetical LOC642852                                                                                        | Homo sapiens |
| 813    | calumenin                                                                                                     | Homo sapiens |
| 60672  | migration and invasion inhibitory protein                                                                     | Homo sapiens |
| 4891   | solute carrier family 11 (proton-coupled divalent metal ion transporters), member 2                           | Homo sapiens |
| 442075 | hypothetical LOC442075                                                                                        | Homo sapiens |
| 56704  | junctophilin 1                                                                                                | Homo sapiens |
| 8932   | methyl-CpG binding domain protein 2                                                                           | Homo sapiens |
| 91612  | churchill domain containing 1                                                                                 | Homo sapiens |
| 1460   | lymphocyte antigen 6 complex, locus G5B; casein kinase 2, beta polypeptide                                    | Homo sapiens |
| 57472  | CCR4-NOT transcription complex, subunit 6                                                                     | Homo sapiens |
| 80757  | transmembrane protein 121                                                                                     | Homo sapiens |
| 9638   | fasciculation and elongation protein zeta 1 (zygin I)                                                         | Homo sapiens |
| 4605   | v-myb myeloblastosis viral oncogene homolog (avian)-like 2                                                    | Homo sapiens |
| 55974  | recombination activating gene 1 activating protein 1                                                          | Homo sapiens |
| 25819  | CCR4 carbon catabolite repression 4-like (S. cerevisiae)                                                      | Homo sapiens |
| 84190  | chromosome 12 open reading frame 26                                                                           | Homo sapiens |
| 7322   | ubiquitin-conjugating enzyme E2D 2 (UBC4/5 homolog, yeast)                                                    | Homo sapiens |
| 374378 | UDP-N-acetyl-alpha-D-galactosamine:polypeptide N-acetylgalactosaminyltransferase-like 4                       | Homo sapiens |
| 10376  | hypothetical gene supported by AF081484; NM_006082; tubulin, alpha 1b                                         | Homo sapiens |
| 22981  | ninein-like                                                                                                   | Homo sapiens |
| 93     | actin A receptor, type IIB                                                                                    | Homo sapiens |
| 5715   | proteasome (prosome, macropain) 26S subunit, non-ATPase, 9                                                    | Homo sapiens |
| 9532   | BCL2-associated athanogene 2                                                                                  | Homo sapiens |
| 84261  | F-box and WD repeat domain containing 9                                                                       | Homo sapiens |
| 79174  | cysteine-rich with EGF-like domains 2                                                                         | Homo sapiens |
| 84142  | family with sequence similarity 175, member A                                                                 | Homo sapiens |
| 7468   | Wolf-Hirschhorn syndrome candidate 1                                                                          | Homo sapiens |
| 79724  | zinc finger protein 768                                                                                       | Homo sapiens |
| 114915 | chromosome 5 open reading frame 26                                                                            | Homo sapiens |
| 149041 | ring finger and CCCH-type zinc finger domains 1                                                               | Homo sapiens |
| 9700   | extra spindle pole bodies homolog 1 (S. cerevisiae)                                                           | Homo sapiens |
| 4141   | methionyl-tRNA synthetase                                                                                     | Homo sapiens |
| 64236  | PDZ and LIM domain 2 (mystique)                                                                               | Homo sapiens |
| 51524  | transmembrane protein 138                                                                                     | Homo sapiens |
| 51322  | WW domain containing adaptor with coiled-coil                                                                 | Homo sapiens |
| 55760  | DEAH (Asp-Glu-Ala-His) box polypeptide 32                                                                     | Homo sapiens |
| 26996  | G protein-coupled receptor 160                                                                                | Homo sapiens |
| 80856  | KIAA1715                                                                                                      | Homo sapiens |
| 55745  | MU-2/API2 domain containing, death-inducing                                                                   | Homo sapiens |
| 114885 | oxysterol binding protein-like 11                                                                             | Homo sapiens |
| 1350   | cytochrome c oxidase subunit VIIc                                                                             | Homo sapiens |
| 89781  | Hermansky-Pudlak syndrome 4                                                                                   | Homo sapiens |
| 54680  | zinc finger, HIT type 6                                                                                       | Homo sapiens |
| 64858  | DNA cross-link repair 1B (PSO2 homolog, S. cerevisiae)                                                        | Homo sapiens |
| 116841 | synaptosomal-associated protein, 47kDa                                                                        | Homo sapiens |
| 23598  | POZ (BTB) and AT hook containing zinc finger 1                                                                | Homo sapiens |
| 57648  | KIAA1522                                                                                                      | Homo sapiens |
| 128977 | chromosome 22 open reading frame 39                                                                           | Homo sapiens |
| 10106  | similar to hCG2013701; CTD (carboxy-terminal domain, RNA polymerase II, polypeptide A)<br>small phosphatase 2 | Homo sapiens |
| 344558 | SH3 domain containing ring finger 3                                                                           | Homo sapiens |
| 26262  | tetraspanin 17                                                                                                | Homo sapiens |
| 10285  | survival motor neuron domain containing 1                                                                     | Homo sapiens |
| 3192   | heterogeneous nuclear ribonucleoprotein U (scaffold attachment factor A)                                      | Homo sapiens |

|        |                                                                                                                                                                                       |              |
|--------|---------------------------------------------------------------------------------------------------------------------------------------------------------------------------------------|--------------|
| 79365  | basic helix-loop-helix family, member e41                                                                                                                                             | Homo sapiens |
| 55140  | elongation protein 3 homolog (S. cerevisiae)                                                                                                                                          | Homo sapiens |
| 26118  | WD repeat and SOCS box-containing 1                                                                                                                                                   | Homo sapiens |
| 83939  | eukaryotic translation initiation factor 2A, 65kDa                                                                                                                                    | Homo sapiens |
| 59283  | calcium channel, voltage-dependent, gamma subunit 8                                                                                                                                   | Homo sapiens |
| 9804   | similar to translocase of outer mitochondrial membrane 20 homolog; similar to mitochondrial outer membrane protein 19; translocase of outer mitochondrial membrane 20 homolog (yeast) | Homo sapiens |
| 23326  | ubiquitin specific peptidase 22                                                                                                                                                       | Homo sapiens |
| 246184 | cell division cycle 26 homolog (S. cerevisiae); cell division cycle 26 homolog (S. cerevisiae) pseudogene                                                                             | Homo sapiens |
| 389741 | hypothetical LOC728903; hypothetical locus MGC21881                                                                                                                                   | Homo sapiens |
| 728903 | hypothetical LOC728903; hypothetical locus MGC21881                                                                                                                                   | Homo sapiens |
| 170506 | DEAH (Asp-Glu-Ala-His) box polypeptide 36                                                                                                                                             | Homo sapiens |
| 54487  | DiGeorge syndrome critical region gene 8                                                                                                                                              | Homo sapiens |
| 92285  | zinc finger protein 585B                                                                                                                                                              | Homo sapiens |
| 729082 | hypothetical protein LOC729082                                                                                                                                                        | Homo sapiens |
| 252839 | transmembrane protein 9                                                                                                                                                               | Homo sapiens |
| 64778  | fibronectin type III domain containing 3B                                                                                                                                             | Homo sapiens |
| 56945  | mitochondrial ribosomal protein S22                                                                                                                                                   | Homo sapiens |
| 54145  | H2B histone family, member S                                                                                                                                                          | Homo sapiens |
| 9474   | ATG5 autophagy related 5 homolog (S. cerevisiae)                                                                                                                                      | Homo sapiens |
| 5218   | PFTAIRE protein kinase 1                                                                                                                                                              | Homo sapiens |
| 25940  | family with sequence similarity 98, member A                                                                                                                                          | Homo sapiens |
| 11278  | Kruppel-like factor 12                                                                                                                                                                | Homo sapiens |
| 9911   | transmembrane and coiled-coil domain family 2                                                                                                                                         | Homo sapiens |
| 149175 | mannosidase, endo-alpha-like                                                                                                                                                          | Homo sapiens |
| 10618  | trans-golgi network protein 2                                                                                                                                                         | Homo sapiens |
| 29117  | bromodomain containing 7; bromodomain containing 7 pseudogene 2                                                                                                                       | Homo sapiens |
| 51300  | chromosome 3 open reading frame 1                                                                                                                                                     | Homo sapiens |
| 11228  | Ras association (RalGDS/AF-6) domain family (N-terminal) member 8                                                                                                                     | Homo sapiens |
| 8634   | RNA terminal phosphate cyclase domain 1                                                                                                                                               | Homo sapiens |
| 57002  | chromosome 7 open reading frame 36                                                                                                                                                    | Homo sapiens |
| 47     | ATP citrate lyase                                                                                                                                                                     | Homo sapiens |
| 5922   | RAS p21 protein activator 2                                                                                                                                                           | Homo sapiens |
| 2747   | glutamate dehydrogenase 2                                                                                                                                                             | Homo sapiens |
| 51136  | ring finger protein, transmembrane 1                                                                                                                                                  | Homo sapiens |
| 11168  | PC4 and SFRS1 interacting protein 1                                                                                                                                                   | Homo sapiens |
| 2013   | epithelial membrane protein 2                                                                                                                                                         | Homo sapiens |
| 22796  | component of oligomeric golgi complex 2                                                                                                                                               | Homo sapiens |
| 8402   | solute carrier family 25 (mitochondrial carrier; oxoglutarate carrier), member 11                                                                                                     | Homo sapiens |
| 23168  | Rtf1, Paf1/RNA polymerase II complex component, homolog (S. cerevisiae)                                                                                                               | Homo sapiens |
| 728239 | melanoma antigen family D, 4B; melanoma antigen family D, 4                                                                                                                           | Homo sapiens |
| 81557  | melanoma antigen family D, 4B; melanoma antigen family D, 4                                                                                                                           | Homo sapiens |
| 9645   | microtubule associated monooxygenase, calponin and LIM domain containing 2                                                                                                            | Homo sapiens |
| 3916   | lysosomal-associated membrane protein 1                                                                                                                                               | Homo sapiens |
| 7581   | zinc finger protein 33A                                                                                                                                                               | Homo sapiens |
| 114818 | kelch-like 29 (Drosophila)                                                                                                                                                            | Homo sapiens |
| 9557   | chromodomain helicase DNA binding protein 1-like                                                                                                                                      | Homo sapiens |
| 699    | budding uninhibited by benzimidazoles 1 homolog (yeast)                                                                                                                               | Homo sapiens |
| 9425   | chromodomain protein, Y-like                                                                                                                                                          | Homo sapiens |
| 7165   | tumor protein D52-like 2                                                                                                                                                              | Homo sapiens |
| 9422   | zinc finger protein 264                                                                                                                                                               | Homo sapiens |
| 7138   | troponin T type 1 (skeletal, slow)                                                                                                                                                    | Homo sapiens |
| 56938  | aryl hydrocarbon receptor nuclear translocator-like 2                                                                                                                                 | Homo sapiens |
| 10196  | protein arginine methyltransferase 3                                                                                                                                                  | Homo sapiens |
| 10522  | deformed epidermal autoregulatory factor 1 (Drosophila)                                                                                                                               | Homo sapiens |
| 138151 | NACC family member 2, BEN and BTB (POZ) domain containing                                                                                                                             | Homo sapiens |
| 5771   | protein tyrosine phosphatase, non-receptor type 2                                                                                                                                     | Homo sapiens |
| 3476   | chromosome 14 open reading frame 19; immunoglobulin (CD79A) binding protein 1                                                                                                         | Homo sapiens |
| 91452  | acyl-Coenzyme A binding domain containing 5                                                                                                                                           | Homo sapiens |
| 51385  | zinc finger protein 589                                                                                                                                                               | Homo sapiens |
| 9411   | Rho GTPase activating protein 29                                                                                                                                                      | Homo sapiens |
| 51088  | kelch-like 5 (Drosophila)                                                                                                                                                             | Homo sapiens |
| 23603  | coronin, actin binding protein, 1C                                                                                                                                                    | Homo sapiens |
| 1649   | DNA-damage-inducible transcript 3                                                                                                                                                     | Homo sapiens |
| 124995 | mitochondrial ribosomal protein L10                                                                                                                                                   | Homo sapiens |
| 7798   | leucine zipper protein 1                                                                                                                                                              | Homo sapiens |
| 3340   | N-deacetylase/N-sulfotransferase (heparan glucosaminyl) 1                                                                                                                             | Homo sapiens |
| 26515  | fracture callus 1 homolog (rat)                                                                                                                                                       | Homo sapiens |
| 374920 | chromosome 19 open reading frame 68                                                                                                                                                   | Homo sapiens |
| 51527  | chromosome 14 open reading frame 129                                                                                                                                                  | Homo sapiens |
| 8795   | tumor necrosis factor receptor superfamily, member 10B                                                                                                                                | Homo sapiens |
| 84914  | zinc finger protein 587                                                                                                                                                               | Homo sapiens |
| 51071  | 2-deoxyribose-5-phosphate aldolase homolog (C. elegans)                                                                                                                               | Homo sapiens |
| 55006  | tRNA methyltransferase 61 homolog B (S. cerevisiae)                                                                                                                                   | Homo sapiens |
| 10019  | SH2B adaptor protein 3                                                                                                                                                                | Homo sapiens |

|        |                                                                                                                                     |              |
|--------|-------------------------------------------------------------------------------------------------------------------------------------|--------------|
| 11222  | mitochondrial ribosomal protein L3                                                                                                  | Homo sapiens |
| 134218 | DnaJ (Hsp40) homolog, subfamily C, member 21                                                                                        | Homo sapiens |
| 29085  | phosphohistidine phosphatase 1                                                                                                      | Homo sapiens |
| 79644  | steroid 5 alpha-reductase 3                                                                                                         | Homo sapiens |
| 6122   | ribosomal protein L3; similar to 60S ribosomal protein L3 (L4)                                                                      | Homo sapiens |
| 490    | ATPase, Ca++ transporting, plasma membrane 1                                                                                        | Homo sapiens |
| 51228  | glycolipid transfer protein; glycolipid transfer protein pseudogene 1                                                               | Homo sapiens |
| 55149  | mitochondrial poly(A) polymerase                                                                                                    | Homo sapiens |
| 93974  | ATPase inhibitory factor 1                                                                                                          | Homo sapiens |
| 55617  | taspace, threonine aspartase, 1                                                                                                     | Homo sapiens |
| 5147   | phosphodiesterase 6D, cGMP-specific, rod, delta                                                                                     | Homo sapiens |
| 1175   | adaptor-related protein complex 2, sigma 1 subunit                                                                                  | Homo sapiens |
| 1678   | translocase of inner mitochondrial membrane 8 homolog A (yeast)                                                                     | Homo sapiens |
| 285755 | peptidylprolyl isomerase (cyclophilin)-like 6                                                                                       | Homo sapiens |
| 6875   | TAF4b RNA polymerase II, TATA box binding protein (TBP)-associated factor, 105kDa                                                   | Homo sapiens |
| 10397  | N-myc downstream regulated 1                                                                                                        | Homo sapiens |
| 11164  | nudix (nucleoside diphosphate linked moiety X)-type motif 5                                                                         | Homo sapiens |
| 6629   | small nuclear ribonucleoprotein polypeptide B'                                                                                      | Homo sapiens |
| 97     | acylphosphatase 1, erythrocyte (common) type                                                                                        | Homo sapiens |
| 2804   | golgin B1, golgi integral membrane protein                                                                                          | Homo sapiens |
| 83930  | STARD3 N-terminal like                                                                                                              | Homo sapiens |
| 54165  | DCN1, defective in cullin neddylation 1, domain containing 1 (S. cerevisiae)                                                        | Homo sapiens |
| 8833   | guanine monphosphate synthetase                                                                                                     | Homo sapiens |
| 84899  | transmembrane and tetratricopeptide repeat containing 4                                                                             | Homo sapiens |
| 51287  | coiled-coil-helix-coiled-coil-helix domain containing 8                                                                             | Homo sapiens |
| 148252 | DIRAS family, GTP-binding RAS-like 1                                                                                                | Homo sapiens |
| 57556  | sema domain, transmembrane domain (TM), and cytoplasmic domain, (semaphorin) 6A                                                     | Homo sapiens |
| 440275 | eukaryotic translation initiation factor 2 alpha kinase 4                                                                           | Homo sapiens |
| 286410 | ATPase, class VI, type 11C                                                                                                          | Homo sapiens |
| 4495   | metallothionein 1G                                                                                                                  | Homo sapiens |
| 9776   | KIAA0652                                                                                                                            | Homo sapiens |
| 23473  | calpain 7                                                                                                                           | Homo sapiens |
| 56942  | chromosome 16 open reading frame 61                                                                                                 | Homo sapiens |
| 6241   | ribonucleotide reductase M2 polypeptide                                                                                             | Homo sapiens |
| 2549   | GRB2-associated binding protein 1                                                                                                   | Homo sapiens |
| 57531  | HECT domain and ankyrin repeat containing, E3 ubiquitin protein ligase 1                                                            | Homo sapiens |
| 27090  | ST6 (alpha-N-acetyl-neuraminyl-2,3-beta-galactosyl-1,3)-N-acetylgalactosaminide alpha-2,6-sialyltransferase 4                       | Homo sapiens |
| 1399   | v-crk sarcoma virus CT10 oncogene homolog (avian)-like                                                                              | Homo sapiens |
| 6881   | TAF10 RNA polymerase II, TATA box binding protein (TBP)-associated factor, 30kDa                                                    | Homo sapiens |
| 79786  | kelch-like 36 (Drosophila)                                                                                                          | Homo sapiens |
| 84418  | chromosome 5 open reading frame 32                                                                                                  | Homo sapiens |
| 767558 | myotrophin; leucine zipper protein 6                                                                                                | Homo sapiens |
| 136319 | myotrophin; leucine zipper protein 6                                                                                                | Homo sapiens |
| 84191  | family with sequence similarity 96, member A                                                                                        | Homo sapiens |
| 58487  | CREB/ATF bZIP transcription factor                                                                                                  | Homo sapiens |
| 641371 | acyl-CoA thioesterase 1                                                                                                             | Homo sapiens |
| 286451 | Yipl domain family, member 6                                                                                                        | Homo sapiens |
| 10055  | SUMO1 activating enzyme subunit 1                                                                                                   | Homo sapiens |
| 6628   | small nuclear ribonucleoprotein polypeptides B and B1                                                                               | Homo sapiens |
| 10626  | tripartite motif-containing 16                                                                                                      | Homo sapiens |
| 64951  | mitochondrial ribosomal protein S24                                                                                                 | Homo sapiens |
| 94241  | tumor protein p53 inducible nuclear protein 1                                                                                       | Homo sapiens |
| 32     | acetyl-Coenzyme A carboxylase beta                                                                                                  | Homo sapiens |
| 51024  | fission 1 (mitochondrial outer membrane) homolog (S. cerevisiae)                                                                    | Homo sapiens |
| 112724 | retinol dehydrogenase 13 (all-trans/9-cis)                                                                                          | Homo sapiens |
| 1783   | dynein, cytoplasmic 1, light intermediate chain 2                                                                                   | Homo sapiens |
| 8405   | speckle-type POZ protein                                                                                                            | Homo sapiens |
| 10094  | similar to actin related protein 2/3 complex subunit 3; hypothetical LOC729841; actin related protein 2/3 complex, subunit 3, 21kDa | Homo sapiens |
| 55591  | vezatin, adherens junctions transmembrane protein                                                                                   | Homo sapiens |
| 80306  | mediator complex subunit 28                                                                                                         | Homo sapiens |
| 10923  | SUB1 homolog (S. cerevisiae)                                                                                                        | Homo sapiens |
| 125988 | chromosome 19 open reading frame 70                                                                                                 | Homo sapiens |
| 3202   | homeobox A5                                                                                                                         | Homo sapiens |
| 55746  | nucleoporin 133kDa                                                                                                                  | Homo sapiens |
| 85313  | peptidylprolyl isomerase (cyclophilin)-like 4                                                                                       | Homo sapiens |
| 6606   | survival of motor neuron 1, telomeric; survival of motor neuron 2, centromeric                                                      | Homo sapiens |
| 6607   | survival of motor neuron 1, telomeric; survival of motor neuron 2, centromeric                                                      | Homo sapiens |
| 55017  | chromosome 14 open reading frame 119                                                                                                | Homo sapiens |
| 1353   | COX11 homolog, cytochrome c oxidase assembly protein (yeast)                                                                        | Homo sapiens |
| 94107  | transmembrane protein 203                                                                                                           | Homo sapiens |
| 8500   | protein tyrosine phosphatase, receptor type, f polypeptide (PTPRF), interacting protein (liprin), alpha 1                           | Homo sapiens |
| 819    | calcium modulating ligand                                                                                                           | Homo sapiens |
| 91893  | ferredoxin-fold anticodon binding domain containing 1                                                                               | Homo sapiens |
| 10985  | GCN1 general control of amino-acid synthesis 1-like 1 (yeast)                                                                       | Homo sapiens |

|           |                                                                                                                                                                                 |              |
|-----------|---------------------------------------------------------------------------------------------------------------------------------------------------------------------------------|--------------|
| 29960     | FtsJ homolog 2 (E. coli)                                                                                                                                                        | Homo sapiens |
| 23243     | ankyrin repeat domain 28                                                                                                                                                        | Homo sapiens |
| 51003     | mediator complex subunit 31                                                                                                                                                     | Homo sapiens |
| 2280      | FK506 binding protein 1A, 12kDa                                                                                                                                                 | Homo sapiens |
| 9314      | Kruppel-like factor 4 (gut)                                                                                                                                                     | Homo sapiens |
| 171023    | additional sex combs like 1 (Drosophila)                                                                                                                                        | Homo sapiens |
| 4300      | myeloid/lymphoid or mixed-lineage leukemia (trithorax homolog, Drosophila); translocated to, 3                                                                                  | Homo sapiens |
| 11215     | A kinase (PRKA) anchor protein 11                                                                                                                                               | Homo sapiens |
| 4750      | NIMA (never in mitosis gene a)-related kinase 1                                                                                                                                 | Homo sapiens |
| 51728     | polymerase (RNA) III (DNA directed) polypeptide K, 12.3 kDa                                                                                                                     | Homo sapiens |
| 93081     | chromosome 13 open reading frame 27                                                                                                                                             | Homo sapiens |
| 995       | cell division cycle 25 homolog C (S. pombe)                                                                                                                                     | Homo sapiens |
| 516       | ATP synthase, H+ transporting, mitochondrial F0 complex, subunit C1 (subunit 9)                                                                                                 | Homo sapiens |
| 1994      | ELAV (embryonic lethal, abnormal vision, Drosophila)-like 1 (Hu antigen R)                                                                                                      | Homo sapiens |
| 124446    | transmembrane protein 219                                                                                                                                                       | Homo sapiens |
| 29079     | mediator complex subunit 4                                                                                                                                                      | Homo sapiens |
| 7026      | nuclear receptor subfamily 2, group F, member 2                                                                                                                                 | Homo sapiens |
| 7334      | ubiquitin-conjugating enzyme E2N (UBC13 homolog, yeast)                                                                                                                         | Homo sapiens |
| 116985    | ArfGAP with RhoGAP domain, ankyrin repeat and PH domain 1                                                                                                                       | Homo sapiens |
| 2987      | guanylate kinase 1                                                                                                                                                              | Homo sapiens |
| 23637     | RAB GTPase activating protein 1                                                                                                                                                 | Homo sapiens |
| 9868      | translocase of outer mitochondrial membrane 70 homolog A (S. cerevisiae)                                                                                                        | Homo sapiens |
| 100131997 | family with sequence similarity 27, member E3; family with sequence similarity 27, member E2; family with sequence similarity 27, member E1; similar to Protein FAM27E2         | Homo sapiens |
| 2908      | nuclear receptor subfamily 3, group C, member 1 (glucocorticoid receptor)                                                                                                       | Homo sapiens |
| 144348    | zinc finger protein 664                                                                                                                                                         | Homo sapiens |
| 100130360 | hypothetical LOC100130360                                                                                                                                                       | Homo sapiens |
| 5781      | protein tyrosine phosphatase, non-receptor type 11; similar to protein tyrosine phosphatase, non-receptor type 11                                                               | Homo sapiens |
| 55716     | limb region 1 homolog (mouse)-like                                                                                                                                              | Homo sapiens |
| 641       | Bloom syndrome, RecQ helicase-like                                                                                                                                              | Homo sapiens |
| 11137     | PWP1 homolog (S. cerevisiae)                                                                                                                                                    | Homo sapiens |
| 10425     | ariadne homolog 2 (Drosophila)                                                                                                                                                  | Homo sapiens |
| 199857    | asparagine-linked glycosylation 14 homolog (S. cerevisiae)                                                                                                                      | Homo sapiens |
| 23232     | TBC1 domain family, member 12                                                                                                                                                   | Homo sapiens |
| 131408    | family with sequence similarity 131, member A                                                                                                                                   | Homo sapiens |
| 9049      | aryl hydrocarbon receptor interacting protein                                                                                                                                   | Homo sapiens |
| 4682      | nucleotide binding protein 1 (MinD homolog, E. coli)                                                                                                                            | Homo sapiens |
| 285033    | hypothetical protein LOC285033                                                                                                                                                  | Homo sapiens |
| 2029      | endosulfine alpha                                                                                                                                                               | Homo sapiens |
| 548645    | DnaJ (Hsp40) homolog, subfamily C, member 25; guanine nucleotide binding protein (G protein), gamma 10; DNAJC25-GNG10 readthrough transcript                                    | Homo sapiens |
| 2790      | DnaJ (Hsp40) homolog, subfamily C, member 25; guanine nucleotide binding protein (G protein), gamma 10; DNAJC25-GNG10 readthrough transcript                                    | Homo sapiens |
| 27257     | LSM1 homolog, U6 small nuclear RNA associated (S. cerevisiae)                                                                                                                   | Homo sapiens |
| 7411      | von Hippel-Lindau binding protein 1                                                                                                                                             | Homo sapiens |
| 134266    | GrpE-like 2, mitochondrial (E. coli)                                                                                                                                            | Homo sapiens |
| 374500    | thrombospondin, type I, domain containing 1 pseudogene                                                                                                                          | Homo sapiens |
| 1389      | cAMP responsive element binding protein-like 2                                                                                                                                  | Homo sapiens |
| 400043    | hypothetical LOC400043                                                                                                                                                          | Homo sapiens |
| 10483     | Sec23 homolog B (S. cerevisiae)                                                                                                                                                 | Homo sapiens |
| 80762     | Nedd4 family interacting protein 1                                                                                                                                              | Homo sapiens |
| 55596     | zinc finger, CCHC domain containing 8                                                                                                                                           | Homo sapiens |
| 10159     | ATPase, H+ transporting, lysosomal accessory protein 2                                                                                                                          | Homo sapiens |
| 3267      | ArfGAP with FG repeats 1                                                                                                                                                        | Homo sapiens |
| 4257      | microsomal glutathione S-transferase 1                                                                                                                                          | Homo sapiens |
| 23013     | spen homolog, transcriptional regulator (Drosophila)                                                                                                                            | Homo sapiens |
| 23019     | CCR4-NOT transcription complex, subunit 1                                                                                                                                       | Homo sapiens |
| 80321     | centrosomal protein 70kDa                                                                                                                                                       | Homo sapiens |
| 160418    | transmembrane and tetratricopeptide repeat containing 3                                                                                                                         | Homo sapiens |
| 9567      | GTP binding protein 1                                                                                                                                                           | Homo sapiens |
| 116461    | tRNA splicing endonuclease 15 homolog (S. cerevisiae)                                                                                                                           | Homo sapiens |
| 147007    | transmembrane protein 199                                                                                                                                                       | Homo sapiens |
| 152189    | CKLF-like MARVEL transmembrane domain containing 8                                                                                                                              | Homo sapiens |
| 10965     | acyl-CoA thioesterase 2                                                                                                                                                         | Homo sapiens |
| 23080     | AVL9 homolog (S. cerevisiae)                                                                                                                                                    | Homo sapiens |
| 7915      | aldehyde dehydrogenase 5 family, member A1                                                                                                                                      | Homo sapiens |
| 57533     | TBC1 domain family, member 14                                                                                                                                                   | Homo sapiens |
| 27348     | torsin family 1, member B (torsin B)                                                                                                                                            | Homo sapiens |
| 54700     | RRN3 RNA polymerase I transcription factor homolog (S. cerevisiae)                                                                                                              | Homo sapiens |
| 4725      | similar to NADH dehydrogenase (ubiquinone) Fe-S protein 5, 15kDa (NADH-coenzyme Q reductase); NADH dehydrogenase (ubiquinone) Fe-S protein 5, 15kDa (NADH-coenzyme Q reductase) | Homo sapiens |
| 11016     | activating transcription factor 7                                                                                                                                               | Homo sapiens |
| 158158    | RAS and EF-hand domain containing                                                                                                                                               | Homo sapiens |
| 3159      | hypothetical LOC100130009; high mobility group AT-hook 1                                                                                                                        | Homo sapiens |

|        |                                                                                                                             |              |
|--------|-----------------------------------------------------------------------------------------------------------------------------|--------------|
| 54892  | non-SMC condensin II complex, subunit G2                                                                                    | Homo sapiens |
| 84962  | jub, ajuba homolog (Xenopus laevis)                                                                                         | Homo sapiens |
| 6785   | elongation of very long chain fatty acids (FEN1/Elo2, SUR4/Elo3, yeast)-like 4                                              | Homo sapiens |
| 2286   | FK506 binding protein 2, 13kDa                                                                                              | Homo sapiens |
| 7105   | tetraspanin 6                                                                                                               | Homo sapiens |
| 84337  | elongation factor 1 homolog (S. cerevisiae)                                                                                 | Homo sapiens |
| 219988 | protein associated with topoisomerase II homolog 1 (yeast)                                                                  | Homo sapiens |
| 81571  | microRNA 600; chromosome 9 open reading frame 45                                                                            | Homo sapiens |
| 285343 | chromosome 3 open reading frame 23                                                                                          | Homo sapiens |
| 81502  | histocompatibility (minor) 13                                                                                               | Homo sapiens |
| 2114   | v-ets erythroblastosis virus E26 oncogene homolog 2 (avian)                                                                 | Homo sapiens |
| 5504   | protein phosphatase 1, regulatory (inhibitor) subunit 2                                                                     | Homo sapiens |
| 2950   | glutathione S-transferase pi 1                                                                                              | Homo sapiens |
| 26973  | cysteine and histidine-rich domain (CHORD)-containing 1; cysteine and histidine-rich domain (CHORD)-containing 1 pseudogene | Homo sapiens |
| 284611 | family with sequence similarity 102, member B                                                                               | Homo sapiens |
| 51562  | MAP3K12 binding inhibitory protein 1                                                                                        | Homo sapiens |
| 2074   | excision repair cross-complementing rodent repair deficiency, complementation group 6                                       | Homo sapiens |
| 26002  | monooxygenase, DBH-like 1                                                                                                   | Homo sapiens |
| 653566 | signal peptidase complex subunit 2 homolog (S. cerevisiae); signal peptidase complex subunit 2 homolog pseudogene           | Homo sapiens |
| 9789   | signal peptidase complex subunit 2 homolog (S. cerevisiae); signal peptidase complex subunit 2 homolog pseudogene           | Homo sapiens |
| 8165   | A kinase (PRKA) anchor protein 1                                                                                            | Homo sapiens |
| 6728   | signal recognition particle 19kDa                                                                                           | Homo sapiens |
| 200933 | F-box protein 45                                                                                                            | Homo sapiens |
| 81532  | HCCA2 protein                                                                                                               | Homo sapiens |
| 11056  | DEAD (Asp-Glu-Ala-Asp) box polypeptide 52                                                                                   | Homo sapiens |
| 23270  | TSPY-like 4                                                                                                                 | Homo sapiens |
| 23174  | zinc finger, CCHC domain containing 14                                                                                      | Homo sapiens |
| 835    | caspace 2, apoptosis-related cysteine peptidase                                                                             | Homo sapiens |
| 7555   | CCHC-type zinc finger, nucleic acid binding protein                                                                         | Homo sapiens |
| 81892  | chromosome 14 open reading frame 156                                                                                        | Homo sapiens |
| 374650 | golgi autoantigen, golgin subfamily a-like pseudogene                                                                       | Homo sapiens |
| 642361 | hypothetical LOC642361                                                                                                      | Homo sapiens |
| 79939  | solute carrier family 35, member E1                                                                                         | Homo sapiens |
| 373    | tripartite motif-containing 23                                                                                              | Homo sapiens |
| 56647  | BRCA2 and CDKN1A interacting protein                                                                                        | Homo sapiens |
| 9882   | TBC1 domain family, member 4                                                                                                | Homo sapiens |
| 6633   | small nuclear ribonucleoprotein D2 polypeptide 16.5kDa; similar to hCG2040270                                               | Homo sapiens |
| 83987  | coiled-coil domain containing 8                                                                                             | Homo sapiens |
| 79090  | trafficking protein particle complex 6A                                                                                     | Homo sapiens |
| 22948  | chaperonin containing TCP1, subunit 5 (epsilon)                                                                             | Homo sapiens |
| 147965 | family with sequence similarity 98, member C                                                                                | Homo sapiens |
| 1487   | C-terminal binding protein 1                                                                                                | Homo sapiens |
| 140735 | dynein, light chain, LC8-type 2                                                                                             | Homo sapiens |
| 7317   | ubiquitin-like modifier activating enzyme 1                                                                                 | Homo sapiens |
| 1739   | discs, large homolog 1 (Drosophila)                                                                                         | Homo sapiens |
| 5465   | peroxisome proliferator-activated receptor alpha                                                                            | Homo sapiens |
| 4259   | microsomal glutathione S-transferase 3                                                                                      | Homo sapiens |
| 2624   | GATA binding protein 2                                                                                                      | Homo sapiens |
| 7533   | tyrosine 3-monooxygenase/tryptophan 5-monooxygenase activation protein, eta polypeptide                                     | Homo sapiens |
| 401431 | hypothetical LOC401431                                                                                                      | Homo sapiens |
| 402055 | SRR1 domain containing                                                                                                      | Homo sapiens |
| 11244  | zinc fingers and homeoboxes 1                                                                                               | Homo sapiens |
| 84722  | proline/serine-rich coiled-coil 1                                                                                           | Homo sapiens |
| 2150   | coagulation factor II (thrombin) receptor-like 1                                                                            | Homo sapiens |
| 55421  | chromosome 17 open reading frame 85                                                                                         | Homo sapiens |
| 10658  | CUG triplet repeat, RNA binding protein 1                                                                                   | Homo sapiens |
| 6228   | ribosomal protein S23                                                                                                       | Homo sapiens |
| 10782  | zinc finger protein 274                                                                                                     | Homo sapiens |
| 53407  | syntaxin 18                                                                                                                 | Homo sapiens |
| 8826   | IQ motif containing GTPase activating protein 1                                                                             | Homo sapiens |
| 55651  | NHP2 ribonucleoprotein homolog (yeast)                                                                                      | Homo sapiens |
| 3113   | major histocompatibility complex, class II, DP alpha 1                                                                      | Homo sapiens |
| 54954  | family with sequence similarity 120C                                                                                        | Homo sapiens |
| 11042  | glucuronidase, beta pseudogene                                                                                              | Homo sapiens |
| 51399  | trafficking protein particle complex 4                                                                                      | Homo sapiens |
| 7775   | zinc finger protein 232                                                                                                     | Homo sapiens |
| 282809 | WD repeat domain 51B                                                                                                        | Homo sapiens |
| 54939  | COMM domain containing 4                                                                                                    | Homo sapiens |
| 79047  | potassium channel tetramerisation domain containing 15                                                                      | Homo sapiens |
| 220906 | hypothetical protein LOC220906                                                                                              | Homo sapiens |
| 134548 | ankyrin repeat domain 43                                                                                                    | Homo sapiens |
| 9530   | BCL2-associated athanogene 4                                                                                                | Homo sapiens |
| 3091   | hypoxia inducible factor 1, alpha subunit (basic helix-loop-helix transcription factor)                                     | Homo sapiens |
| 23085  | ELKS/RAB6-interacting/CAST family member 1                                                                                  | Homo sapiens |

|           |                                                                                                   |              |
|-----------|---------------------------------------------------------------------------------------------------|--------------|
| 28511     | NFKB inhibitor interacting Ras-like 2                                                             | Homo sapiens |
| 23353     | unc-84 homolog A ( <i>C. elegans</i> )                                                            | Homo sapiens |
| 23062     | golgi associated, gamma adaptin ear containing, ARF binding protein 2                             | Homo sapiens |
| 130399    | activin A receptor, type IC                                                                       | Homo sapiens |
| 4817      | nitrilase 1                                                                                       | Homo sapiens |
| 4739      | neural precursor cell expressed, developmentally down-regulated 9                                 | Homo sapiens |
| 149076    | zinc finger protein 362                                                                           | Homo sapiens |
| 7570      | zinc finger protein 22 (KOX 15)                                                                   | Homo sapiens |
| 84319     | chromosome 3 open reading frame 26                                                                | Homo sapiens |
| 51426     | polymerase (DNA directed) kappa                                                                   | Homo sapiens |
| 10523     | calcium homeostasis endoplasmic reticulum protein                                                 | Homo sapiens |
| 6249      | CAP-GLY domain containing linker protein 1                                                        | Homo sapiens |
| 3145      | hydroxymethylbilane synthase                                                                      | Homo sapiens |
| 22900     | caspase recruitment domain family, member 8                                                       | Homo sapiens |
| 80199     | fuzzy homolog ( <i>Drosophila</i> )                                                               | Homo sapiens |
| 83955     | nascent-polypeptide-associated complex alpha polypeptide pseudogene 1                             | Homo sapiens |
| 55178     | RNA methyltransferase like 1                                                                      | Homo sapiens |
| 23136     | erythrocyte membrane protein band 4.1-like 3                                                      | Homo sapiens |
| 9055      | protein regulator of cytokinesis 1                                                                | Homo sapiens |
| 51388     | nuclear import 7 homolog ( <i>S. cerevisiae</i> )                                                 | Homo sapiens |
| 63943     | FK506 binding protein like                                                                        | Homo sapiens |
| 51523     | CXXC finger 5                                                                                     | Homo sapiens |
| 83877     | TM2 domain containing 2                                                                           | Homo sapiens |
| 6493      | single-minded homolog 2 ( <i>Drosophila</i> )                                                     | Homo sapiens |
| 79811     | SAFB-like, transcription modulator                                                                | Homo sapiens |
| 55636     | chromodomain helicase DNA binding protein 7                                                       | Homo sapiens |
| 653820    | family with sequence similarity 72, member B                                                      | Homo sapiens |
| 9919      | SEC16 homolog A ( <i>S. cerevisiae</i> )                                                          | Homo sapiens |
| 6046      | bromodomain containing 2                                                                          | Homo sapiens |
| 23609     | makorin ring finger protein 2                                                                     | Homo sapiens |
| 6319      | stearoyl-CoA desaturase (delta-9-desaturase)                                                      | Homo sapiens |
| 122704    | mitochondrial ribosomal protein L52                                                               | Homo sapiens |
| 26235     | F-box and leucine-rich repeat protein 4                                                           | Homo sapiens |
| 387723    | similar to hCG1648656                                                                             | Homo sapiens |
| 92597     | MOBL, Mps One Binder kinase activator-like 1A (yeast)                                             | Homo sapiens |
| 91975     | zinc finger protein 300                                                                           | Homo sapiens |
| 54796     | basonuclin 2                                                                                      | Homo sapiens |
| 10724     | meningioma expressed antigen 5 (hyaluronidase)                                                    | Homo sapiens |
| 153129    | solute carrier family 38, member 9                                                                | Homo sapiens |
| 4152      | methyl-CpG binding domain protein 1                                                               | Homo sapiens |
| 9063      | protein inhibitor of activated STAT, 2                                                            | Homo sapiens |
| 285440    | cytochrome P450, family 4, subfamily V, polypeptide 2                                             | Homo sapiens |
| 7428      | von Hippel-Lindau tumor suppressor                                                                | Homo sapiens |
| 3550      | similar to CG18005; IK cytokine, down-regulator of HLA II                                         | Homo sapiens |
| 6742      | single-stranded DNA binding protein 1                                                             | Homo sapiens |
| 220002    | cytochrome b, ascorbate dependent 3                                                               | Homo sapiens |
| 4833      | non-metastatic cells 4, protein expressed in                                                      | Homo sapiens |
| 10575     | chaperonin containing TCP1, subunit 4 (delta)                                                     | Homo sapiens |
| 4193      | Mdm2 p53 binding protein homolog (mouse)                                                          | Homo sapiens |
| 117145    | thioesterase superfamily member 4                                                                 | Homo sapiens |
| 493       | ATPase, Ca <sup>++</sup> transporting, plasma membrane 4                                          | Homo sapiens |
| 29089     | ubiquitin-conjugating enzyme E2T (putative)                                                       | Homo sapiens |
| 5886      | RAD23 homolog A ( <i>S. cerevisiae</i> )                                                          | Homo sapiens |
| 100289635 | similar to ZNF605 protein                                                                         | Homo sapiens |
| 147699    | protein phosphatase 1B-like                                                                       | Homo sapiens |
| 23587     | chromosome 17 open reading frame 81                                                               | Homo sapiens |
| 6602      | SWI/SNF related, matrix associated, actin dependent regulator of chromatin, subfamily d, member 1 | Homo sapiens |
| 144233    | BCDIN3 domain containing                                                                          | Homo sapiens |
| 6184      | ribophorin I                                                                                      | Homo sapiens |
| 94101     | ORM1-like 1 ( <i>S. cerevisiae</i> )                                                              | Homo sapiens |
| 1984      | eukaryotic translation initiation factor 5A; eukaryotic translation initiation factor 5A-like 1   | Homo sapiens |
| 83933     | histone deacetylase 10                                                                            | Homo sapiens |
| 8725      | chromosome 19 open reading frame 2                                                                | Homo sapiens |
| 3422      | isopentenyl-diphosphate delta isomerase 1                                                         | Homo sapiens |
| 729218    | hypothetical LOC729218                                                                            | Homo sapiens |
| 5167      | ectonucleotide pyrophosphatase/phosphodiesterase 1                                                | Homo sapiens |
| 6857      | synaptotagmin I                                                                                   | Homo sapiens |
| 11234     | Hermansky-Pudlak syndrome 5                                                                       | Homo sapiens |
| 151648    | shugoshin-like 1 ( <i>S. pombe</i> )                                                              | Homo sapiens |
| 51078     | THAP domain containing 4                                                                          | Homo sapiens |
| 221833    | Sp8 transcription factor                                                                          | Homo sapiens |
| 8315      | BRCA1 associated protein                                                                          | Homo sapiens |
| 51455     | REV1 homolog ( <i>S. cerevisiae</i> )                                                             | Homo sapiens |
| 10133     | optineurin                                                                                        | Homo sapiens |
| 50862     | ring finger protein 141                                                                           | Homo sapiens |

|           |                                                                                                                                                                             |              |
|-----------|-----------------------------------------------------------------------------------------------------------------------------------------------------------------------------|--------------|
| 55720     | TSR1, 20S rRNA accumulation, homolog ( <i>S. cerevisiae</i> )                                                                                                               | Homo sapiens |
| 7284      | Tu translation elongation factor, mitochondrial                                                                                                                             | Homo sapiens |
| 5451      | POU class 2 homeobox 1                                                                                                                                                      | Homo sapiens |
| 79071     | ELOVL family member 6, elongation of long chain fatty acids (FEN1/Elo2, SUR4/Elo3-like, yeast)                                                                              | Homo sapiens |
| 54663     | WD repeat domain 74                                                                                                                                                         | Homo sapiens |
| 6386      | syndecan binding protein (syntenin)                                                                                                                                         | Homo sapiens |
| 4081      | mab-21-like 1 ( <i>C. elegans</i> )                                                                                                                                         | Homo sapiens |
| 142940    | TruB pseudouridine (psi) synthase homolog 1 ( <i>E. coli</i> )                                                                                                              | Homo sapiens |
| 653784    | family with sequence similarity 128, member A                                                                                                                               | Homo sapiens |
| 5229      | protein geranylgeranyltransferase type I, beta subunit                                                                                                                      | Homo sapiens |
| 8438      | RAD54-like ( <i>S. cerevisiae</i> )                                                                                                                                         | Homo sapiens |
| 9445      | integral membrane protein 2B                                                                                                                                                | Homo sapiens |
| 84188     | fatty acyl CoA reductase 1                                                                                                                                                  | Homo sapiens |
| 644873    | hypothetical LOC644873                                                                                                                                                      | Homo sapiens |
| 285855    | ribosomal protein L7-like 1; ribosomal protein L7 pseudogene 14; ribosomal protein L7 pseudogene 21; ribosomal protein L7 pseudogene 22; ribosomal protein L7 pseudogene 46 | Homo sapiens |
| 3184      | heterogeneous nuclear ribonucleoprotein D (AU-rich element RNA binding protein 1, 37kDa)                                                                                    | Homo sapiens |
| 84193     | SET domain containing 3                                                                                                                                                     | Homo sapiens |
| 10553     | HIV-1 Tat interactive protein 2, 30kDa                                                                                                                                      | Homo sapiens |
| 26043     | UBX domain protein 7                                                                                                                                                        | Homo sapiens |
| 23256     | secl family domain containing 1                                                                                                                                             | Homo sapiens |
| 517       | ATP synthase, H <sup>+</sup> transporting, mitochondrial F0 complex, subunit C2 (subunit 9)                                                                                 | Homo sapiens |
| 829       | capping protein (actin filament) muscle Z-line, alpha 1                                                                                                                     | Homo sapiens |
| 55851     | presenilin enhancer 2 homolog ( <i>C. elegans</i> )                                                                                                                         | Homo sapiens |
| 5033      | prolyl 4-hydroxylase, alpha polypeptide 1                                                                                                                                   | Homo sapiens |
| 9798      | similar to CG10103; KIAA0174                                                                                                                                                | Homo sapiens |
| 25976     | TCDD-inducible poly(ADP-ribose) polymerase                                                                                                                                  | Homo sapiens |
| 1910      | endothelin receptor type B                                                                                                                                                  | Homo sapiens |
| 23476     | bromodomain containing 4                                                                                                                                                    | Homo sapiens |
| 10135     | nicotinamide phosphoribosyltransferase                                                                                                                                      | Homo sapiens |
| 85007     | alanine-glyoxylate aminotransferase 2-like 2                                                                                                                                | Homo sapiens |
| 6134      | ribosomal protein L10; ribosomal protein L10 pseudogene 15; ribosomal protein L10 pseudogene 6; ribosomal protein L10 pseudogene 16; ribosomal protein L10 pseudogene 9     | Homo sapiens |
| 85027     | MSTP150                                                                                                                                                                     | Homo sapiens |
| 6239      | ras responsive element binding protein 1                                                                                                                                    | Homo sapiens |
| 51735     | Rap guanine nucleotide exchange factor (GEF) 6                                                                                                                              | Homo sapiens |
| 8260      | ARD1 homolog A, N-acetyltransferase ( <i>S. cerevisiae</i> )                                                                                                                | Homo sapiens |
| 6310      | ataxin 1                                                                                                                                                                    | Homo sapiens |
| 129563    | DIS3 mitotic control homolog ( <i>S. cerevisiae</i> )-like 2                                                                                                                | Homo sapiens |
| 2289      | FK506 binding protein 5                                                                                                                                                     | Homo sapiens |
| 54478     | family with sequence similarity 64, member A                                                                                                                                | Homo sapiens |
| 9766      | KIAA0247                                                                                                                                                                    | Homo sapiens |
| 59345     | guanine nucleotide binding protein (G protein), beta polypeptide 4                                                                                                          | Homo sapiens |
| 6464      | SHC (Src homology 2 domain containing) transforming protein 1                                                                                                               | Homo sapiens |
| 10156     | RAS p21 protein activator 4; RAS p21 protein activator 4 pseudogene                                                                                                         | Homo sapiens |
| 3135      | major histocompatibility complex, class I, G                                                                                                                                | Homo sapiens |
| 9603      | nuclear factor (erythroid-derived 2)-like 3                                                                                                                                 | Homo sapiens |
| 1666      | 2,4-dienoyl CoA reductase 1, mitochondrial                                                                                                                                  | Homo sapiens |
| 7046      | transforming growth factor, beta receptor 1                                                                                                                                 | Homo sapiens |
| 55159     | ring finger and WD repeat domain 3                                                                                                                                          | Homo sapiens |
| 4254      | KIT ligand                                                                                                                                                                  | Homo sapiens |
| 51025     | mitochondria-associated protein involved in granulocyte-macrophage colony-stimulating factor signal transduction                                                            | Homo sapiens |
| 1457      | casein kinase 2, alpha 1 polypeptide pseudogene; casein kinase 2, alpha 1 polypeptide                                                                                       | Homo sapiens |
| 84969     | TOX high mobility group box family member 2                                                                                                                                 | Homo sapiens |
| 100131354 | hypothetical LOC100131354                                                                                                                                                   | Homo sapiens |
| 8030      | coiled-coil domain containing 6                                                                                                                                             | Homo sapiens |
| 1164      | CDC28 protein kinase regulatory subunit 2                                                                                                                                   | Homo sapiens |
| 5214      | phosphofructokinase, platelet                                                                                                                                               | Homo sapiens |
| 9857      | centrosomal protein 350kDa                                                                                                                                                  | Homo sapiens |
| 3692      | eukaryotic translation initiation factor 6                                                                                                                                  | Homo sapiens |
| 5997      | regulator of G-protein signaling 2, 24kDa                                                                                                                                   | Homo sapiens |
| 200424    | tet oncogene family member 3                                                                                                                                                | Homo sapiens |
| 158219    | tetratricopeptide repeat domain 39B                                                                                                                                         | Homo sapiens |
| 6208      | ribosomal protein S14                                                                                                                                                       | Homo sapiens |
| 60626     | resistance to inhibitors of cholinesterase 8 homolog A ( <i>C. elegans</i> )                                                                                                | Homo sapiens |
| 9988      | cyclin D binding myb-like transcription factor 1                                                                                                                            | Homo sapiens |
| 79572     | ATPase type 13A3                                                                                                                                                            | Homo sapiens |
| 84298     | LLP homolog, long-term synaptic facilitation (Aplysia); similar to LLP homolog; similar to hCG2013595                                                                       | Homo sapiens |
| 54883     | coiled-coil domain containing 49                                                                                                                                            | Homo sapiens |
| 64710     | nuclear casein kinase and cyclin-dependent kinase substrate 1                                                                                                               | Homo sapiens |
| 22873     | DAZ interacting protein 1                                                                                                                                                   | Homo sapiens |
| 53827     | FXFD domain containing ion transport regulator 5                                                                                                                            | Homo sapiens |
| 10772     | FUS interacting protein (serine/arginine-rich) 1; similar to FUS interacting protein (serine-arginine rich) 1                                                               | Homo sapiens |



|           |                                                                                                                 |              |
|-----------|-----------------------------------------------------------------------------------------------------------------|--------------|
| 902       | cyclin H                                                                                                        | Homo sapiens |
| 107       | adenylate cyclase 1 (brain)                                                                                     | Homo sapiens |
| 800       | caldesmon 1                                                                                                     | Homo sapiens |
| 3150      | high-mobility group nucleosome binding domain 1                                                                 | Homo sapiens |
| 9767      | PHD finger protein 16                                                                                           | Homo sapiens |
| 80727     | tweety homolog 3 (Drosophila)                                                                                   | Homo sapiens |
| 54918     | CKLF-like MARVEL transmembrane domain containing 6                                                              | Homo sapiens |
| 5780      | protein tyrosine phosphatase, non-receptor type 9                                                               | Homo sapiens |
| 10554     | 1-acylglycerol-3-phosphate O-acyltransferase 1 (lysophosphatidic acid acyltransferase, alpha)                   | Homo sapiens |
| 26155     | nucleolar complex associated 2 homolog (S. cerevisiae)                                                          | Homo sapiens |
| 729515    | chromosome 6 open reading frame 35; hCG1820764; tetratricopeptide repeat domain 28                              | Homo sapiens |
| 23331     | chromosome 6 open reading frame 35; hCG1820764; tetratricopeptide repeat domain 28                              | Homo sapiens |
| 100289098 | hypothetical protein LOC100289098                                                                               | Homo sapiens |
| 23531     | monocyte to macrophage differentiation-associated                                                               | Homo sapiens |
| 613       | breakpoint cluster region                                                                                       | Homo sapiens |
| 30836     | deoxynucleotidyltransferase, terminal, interacting protein 2                                                    | Homo sapiens |
| 4782      | nuclear factor I/C (CCAAT-binding transcription factor)                                                         | Homo sapiens |
| 23291     | F-box and WD repeat domain containing 11                                                                        | Homo sapiens |
| 8324      | frizzled homolog 7 (Drosophila)                                                                                 | Homo sapiens |
| 4591      | tripartite motif-containing 37                                                                                  | Homo sapiens |
| 6118      | replication protein A2, 32kDa                                                                                   | Homo sapiens |
| 55872     | PDZ binding kinase                                                                                              | Homo sapiens |
| 1355      | COX15 homolog, cytochrome c oxidase assembly protein (yeast)                                                    | Homo sapiens |
| 11044     | polymerase (DNA directed) sigma                                                                                 | Homo sapiens |
| 5162      | pyruvate dehydrogenase (lipoamide) beta                                                                         | Homo sapiens |
| 1974      | similar to eukaryotic translation initiation factor 4A2; eukaryotic translation initiation factor 4A, isoform 2 | Homo sapiens |
| 10455     | peroxisomal D3,D2-enoyl-CoA isomerase                                                                           | Homo sapiens |
| 7803      | protein tyrosine phosphatase type IVA, member 1                                                                 | Homo sapiens |
| 100287515 | similar to zinc finger protein 26 (KOX 20)                                                                      | Homo sapiens |
| 6439      | surfactant protein B                                                                                            | Homo sapiens |
| 81575     | apolipoprotein L domain containing 1                                                                            | Homo sapiens |
| 8195      | McKusick-Kaufman syndrome                                                                                       | Homo sapiens |
| 3344      | forkhead box N2                                                                                                 | Homo sapiens |
| 7112      | thymopoietin                                                                                                    | Homo sapiens |
| 400322    | hect domain and RLD 2 pseudogene 2; hect domain and RLD 2 pseudogene 3                                          | Homo sapiens |
| 63905     | mannosidase, beta A, lysosomal-like; similar to mannosidase, beta A, lysosomal-like                             | Homo sapiens |
| 4214      | mitogen-activated protein kinase kinase kinase 1                                                                | Homo sapiens |
| 571       | BTB and CNC homology 1, basic leucine zipper transcription factor 1                                             | Homo sapiens |
| 10980     | COP9 constitutive photomorphogenic homolog subunit 6 (Arabidopsis)                                              | Homo sapiens |
| 440423    | suppressor of zeste 12 homolog pseudogene                                                                       | Homo sapiens |
| 84314     | transmembrane protein 107                                                                                       | Homo sapiens |
| 9663      | lipin 2                                                                                                         | Homo sapiens |
| 84973     | small nucleolar RNA host gene 7 (non-protein coding)                                                            | Homo sapiens |
| 134957    | syntaxin binding protein 5 (tomosyn)                                                                            | Homo sapiens |
| 22847     | zinc finger protein 507                                                                                         | Homo sapiens |
| 60491     | NIF3 NGG1 interacting factor 3-like 1 (S. pombe)                                                                | Homo sapiens |
| 483       | ATPase, Na+/K+ transporting, beta 3 polypeptide                                                                 | Homo sapiens |
| 66008     | trafficking protein, kinesin binding 2                                                                          | Homo sapiens |
| 6300      | mitogen-activated protein kinase 12                                                                             | Homo sapiens |
| 81627     | chromosome 1 open reading frame 25                                                                              | Homo sapiens |
| 57182     | ankyrin repeat domain 50                                                                                        | Homo sapiens |
| 84928     | transmembrane protein 209                                                                                       | Homo sapiens |
| 8555      | CDC14 cell division cycle 14 homolog B (S. cerevisiae)                                                          | Homo sapiens |
| 7644      | zinc finger protein 91                                                                                          | Homo sapiens |
| 125228    | chromosome 18 open reading frame 19                                                                             | Homo sapiens |
| 10056     | phenylalanyl-tRNA synthetase, beta subunit                                                                      | Homo sapiens |
| 29969     | MyoD family inhibitor domain containing                                                                         | Homo sapiens |
| 83786     | FERM domain containing 8                                                                                        | Homo sapiens |
| 2937      | glutathione synthetase                                                                                          | Homo sapiens |
| 54460     | mitochondrial ribosomal protein S21                                                                             | Homo sapiens |
| 4644      | myosin VA (heavy chain 12, myosin)                                                                              | Homo sapiens |
| 23075     | SWAP switching B-cell complex 70kDa subunit                                                                     | Homo sapiens |
| 98        | acylphosphatase 2, muscle type                                                                                  | Homo sapiens |
| 114971    | protein tyrosine phosphatase, mitochondrial 1                                                                   | Homo sapiens |
| 29937     | neuron derived neurotrophic factor                                                                              | Homo sapiens |
| 60674     | growth arrest-specific 5 (non-protein coding)                                                                   | Homo sapiens |
| 127262    | tumor protein p63 regulated 1-like                                                                              | Homo sapiens |
| 526       | ATPase, H+ transporting, lysosomal 56/58kDa, V1 subunit B2                                                      | Homo sapiens |
| 6461      | Src homology 2 domain containing adaptor protein B                                                              | Homo sapiens |
| 7296      | thioredoxin reductase 1; hypothetical LOC100130902                                                              | Homo sapiens |
| 2145      | enhancer of zeste homolog 1 (Drosophila)                                                                        | Homo sapiens |
| 10237     | solute carrier family 35, member B1                                                                             | Homo sapiens |
| 648       | BMI1 polycomb ring finger oncogene                                                                              | Homo sapiens |
| 122961    | iron-sulfur cluster assembly 2 homolog (S. cerevisiae)                                                          | Homo sapiens |
| 220963    | solute carrier family 16, member 9 (monocarboxylic acid transporter 9)                                          | Homo sapiens |

|           |                                                                                                                                          |              |
|-----------|------------------------------------------------------------------------------------------------------------------------------------------|--------------|
| 527       | ATPase, H <sup>+</sup> transporting, lysosomal 16kDa, V0 subunit c                                                                       | Homo sapiens |
| 129285    | KLRAQ motif containing 1                                                                                                                 | Homo sapiens |
| 6856      | synaptophysin-like 1                                                                                                                     | Homo sapiens |
| 55240     | STEAP family member 3                                                                                                                    | Homo sapiens |
| 64848     | YTH domain containing 2                                                                                                                  | Homo sapiens |
| 100287525 | hypothetical protein LOC100287525                                                                                                        | Homo sapiens |
| 3301      | DnaJ (Hsp40) homolog, subfamily A, member 1                                                                                              | Homo sapiens |
| 23317     | DnaJ (Hsp40) homolog, subfamily C, member 13                                                                                             | Homo sapiens |
| 10413     | Yes-associated protein 1, 65kDa                                                                                                          | Homo sapiens |
| 347733    | tubulin, beta 2B                                                                                                                         | Homo sapiens |
| 126328    | NADH dehydrogenase (ubiquinone) 1 alpha subcomplex, 11, 14.7kDa                                                                          | Homo sapiens |
| 51692     | cleavage and polyadenylation specific factor 3, 73kDa                                                                                    | Homo sapiens |
| 8678      | beclin 1, autophagy related                                                                                                              | Homo sapiens |
| 23384     | cytospin A                                                                                                                               | Homo sapiens |
| 27246     | ring finger protein 115                                                                                                                  | Homo sapiens |
| 2794      | guanine nucleotide binding protein-like 1                                                                                                | Homo sapiens |
| 64425     | polymerase (RNA) I polypeptide E, 53kDa                                                                                                  | Homo sapiens |
| 22872     | SEC31 homolog A ( <i>S. cerevisiae</i> )                                                                                                 | Homo sapiens |
| 7295      | thioredoxin                                                                                                                              | Homo sapiens |
| 6229      | ribosomal protein S24                                                                                                                    | Homo sapiens |
| 4976      | optic atrophy 1 (autosomal dominant)                                                                                                     | Homo sapiens |
| 123       | adipose differentiation-related protein                                                                                                  | Homo sapiens |
| 55664     | cell division cycle 37 homolog ( <i>S. cerevisiae</i> )-like 1                                                                           | Homo sapiens |
| 10153     | CCAAT/enhancer binding protein (C/EBP), zeta                                                                                             | Homo sapiens |
| 5631      | phosphoribosyl pyrophosphate synthetase 1; phosphoribosyl pyrophosphate synthetase 1-like 1                                              | Homo sapiens |
| 84816     | reticulon 4 interacting protein 1                                                                                                        | Homo sapiens |
| 64112     | modulator of apoptosis 1                                                                                                                 | Homo sapiens |
| 9093      | DnaJ (Hsp40) homolog, subfamily A, member 3                                                                                              | Homo sapiens |
| 375757    | chromosome 9 open reading frame 119                                                                                                      | Homo sapiens |
| 116150    | nuclear undecaprenyl pyrophosphate synthase 1 pseudogene; nuclear undecaprenyl pyrophosphate synthase 1 homolog ( <i>S. cerevisiae</i> ) | Homo sapiens |
| 25813     | sorting and assembly machinery component 50 homolog ( <i>S. cerevisiae</i> )                                                             | Homo sapiens |
| 51608     | chromosome 7 open reading frame 20                                                                                                       | Homo sapiens |
| 51506     | ubiquitin-fold modifier conjugating enzyme 1                                                                                             | Homo sapiens |
| 140465    | myosin, light chain 6B, alkali, smooth muscle and non-muscle                                                                             | Homo sapiens |
| 23052     | endonuclease domain containing 1                                                                                                         | Homo sapiens |
| 64359     | nucleoredoxin                                                                                                                            | Homo sapiens |
| 10574     | chaperonin containing TCP1, subunit 7 (eta)                                                                                              | Homo sapiens |
| 8697      | cell division cycle 23 homolog ( <i>S. cerevisiae</i> )                                                                                  | Homo sapiens |
| 55297     | coiled-coil domain containing 91                                                                                                         | Homo sapiens |
| 55122     | akirin 2                                                                                                                                 | Homo sapiens |
| 1535      | cytochrome b-245, alpha polypeptide                                                                                                      | Homo sapiens |
| 84154     | brix domain containing 1 pseudogene; brix domain containing 1                                                                            | Homo sapiens |
| 57584     | Rho GTPase activating protein 21                                                                                                         | Homo sapiens |
| 151195    | cyclin Y-like 1                                                                                                                          | Homo sapiens |
| 729614    | hypothetical LOC729614                                                                                                                   | Homo sapiens |
| 197131    | ubiquitin protein ligase E3 component n-recogin 1                                                                                        | Homo sapiens |
| 6019      | relaxin 2                                                                                                                                | Homo sapiens |
| 57190     | selenoprotein N, 1                                                                                                                       | Homo sapiens |
| 63892     | thyroid adenoma associated                                                                                                               | Homo sapiens |
| 85865     | GTP-binding protein 10 (putative)                                                                                                        | Homo sapiens |
| 85460     | zinc finger protein 518B                                                                                                                 | Homo sapiens |
| 1662      | DEAD (Asp-Glu-Ala-Asp) box polypeptide 10                                                                                                | Homo sapiens |
| 5193      | peroxisomal biogenesis factor 12                                                                                                         | Homo sapiens |
| 56259     | catenin, beta like 1                                                                                                                     | Homo sapiens |
| 55256     | acireductone dioxygenase 1                                                                                                               | Homo sapiens |
| 9967      | thyroid hormone receptor associated protein 3                                                                                            | Homo sapiens |
| 22800     | related RAS viral (r-ras) oncogene homolog 2; similar to related RAS viral (r-ras) oncogene homolog 2                                    | Homo sapiens |
| 5912      | RAP2B, member of RAS oncogene family                                                                                                     | Homo sapiens |
| 642       | bleomycin hydrolase                                                                                                                      | Homo sapiens |
| 8774      | N-ethylmaleimide-sensitive factor attachment protein, gamma                                                                              | Homo sapiens |
| 55667     | DENN/MADD domain containing 4C                                                                                                           | Homo sapiens |
| 6095      | RAR-related orphan receptor A                                                                                                            | Homo sapiens |
| 1952      | cadherin, EGF LAG seven-pass G-type receptor 2 (flamingo homolog, <i>Drosophila</i> )                                                    | Homo sapiens |
| 79139     | Der1-like domain family, member 1                                                                                                        | Homo sapiens |
| 121274    | zinc finger protein 641                                                                                                                  | Homo sapiens |
| 81603     | tripartite motif-containing 8                                                                                                            | Homo sapiens |
| 140707    | BRI3 binding protein                                                                                                                     | Homo sapiens |
| 7551      | zinc finger protein 3                                                                                                                    | Homo sapiens |
| 79647     | akirin 1                                                                                                                                 | Homo sapiens |
| 471       | 5-aminoimidazole-4-carboxamide ribonucleotide formyltransferase/IMP cyclohydrolase                                                       | Homo sapiens |
| 8550      | mitogen-activated protein kinase-activated protein kinase 5                                                                              | Homo sapiens |
| 55183     | RAP1 interacting factor homolog (yeast)                                                                                                  | Homo sapiens |
| 151903    | coiled-coil domain containing 12                                                                                                         | Homo sapiens |
| 23139     | microtubule associated serine/threonine kinase 2                                                                                         | Homo sapiens |

|        |                                                                                                                                    |              |
|--------|------------------------------------------------------------------------------------------------------------------------------------|--------------|
| 10592  | structural maintenance of chromosomes 2                                                                                            | Homo sapiens |
| 36     | acyl-Coenzyme A dehydrogenase, short/branched chain                                                                                | Homo sapiens |
| 10785  | WD repeat domain 4                                                                                                                 | Homo sapiens |
| 80223  | RAB11 family interacting protein 1 (class I)                                                                                       | Homo sapiens |
| 6188   | ribosomal protein S3 pseudogene 3; ribosomal protein S3                                                                            | Homo sapiens |
| 30844  | EH-domain containing 4                                                                                                             | Homo sapiens |
| 10190  | thioredoxin domain containing 9                                                                                                    | Homo sapiens |
| 23032  | ubiquitin specific peptidase 33                                                                                                    | Homo sapiens |
| 9585   | kinesin family member 20B                                                                                                          | Homo sapiens |
| 57486  | neurolysin (metallopeptidase M3 family)                                                                                            | Homo sapiens |
| 80219  | coenzyme Q10 homolog B ( <i>S. cerevisiae</i> )                                                                                    | Homo sapiens |
| 55236  | ubiquitin-like modifier activating enzyme 6                                                                                        | Homo sapiens |
| 284613 | cytochrome b-561 domain containing 1                                                                                               | Homo sapiens |
| 51329  | ADP-ribosylation-like factor 6 interacting protein 4                                                                               | Homo sapiens |
| 4281   | midline 1 (Opitz/BBB syndrome)                                                                                                     | Homo sapiens |
| 57561  | arrestin domain containing 3                                                                                                       | Homo sapiens |
| 23171  | glycerol-3-phosphate dehydrogenase 1-like                                                                                          | Homo sapiens |
| 51026  | golgi transport 1 homolog B ( <i>S. cerevisiae</i> )                                                                               | Homo sapiens |
| 5238   | phosphoglucomutase 3                                                                                                               | Homo sapiens |
| 28974  | chromosome 19 open reading frame 53                                                                                                | Homo sapiens |
| 55605  | kinesin family member 21A                                                                                                          | Homo sapiens |
| 64097  | erythrocyte membrane protein band 4.1 like 4A                                                                                      | Homo sapiens |
| 2521   | fusion (involved in t(12;16) in malignant liposarcoma)                                                                             | Homo sapiens |
| 92703  | transmembrane protein 183A; transmembrane protein 183B                                                                             | Homo sapiens |
| 653659 | transmembrane protein 183A; transmembrane protein 183B                                                                             | Homo sapiens |
| 80204  | F-box protein 11                                                                                                                   | Homo sapiens |
| 2059   | epidermal growth factor receptor pathway substrate 8                                                                               | Homo sapiens |
| 79006  | meteorin, glial cell differentiation regulator                                                                                     | Homo sapiens |
| 6156   | ribosomal protein L30                                                                                                              | Homo sapiens |
| 23268  | dynamin binding protein                                                                                                            | Homo sapiens |
| 283070 | hypothetical LOC283070                                                                                                             | Homo sapiens |
| 57325  | CSRP2 binding protein                                                                                                              | Homo sapiens |
| 79007  | dysbindin (dystrobrevin binding protein 1) domain containing 1                                                                     | Homo sapiens |
| 4282   | macrophage migration inhibitory factor (glycosylation-inhibiting factor)                                                           | Homo sapiens |
| 55599  | RNA-binding region (RNPL, RRM) containing 3                                                                                        | Homo sapiens |
| 114908 | transmembrane protein 123                                                                                                          | Homo sapiens |
| 65265  | chromosome 8 open reading frame 33                                                                                                 | Homo sapiens |
| 132430 | poly(A) binding protein, cytoplasmic 4-like                                                                                        | Homo sapiens |
| 22882  | zinc fingers and homeoboxes 2                                                                                                      | Homo sapiens |
| 9922   | IQ motif and Sec7 domain 1                                                                                                         | Homo sapiens |
| 388135 | chromosome 15 open reading frame 59                                                                                                | Homo sapiens |
| 79836  | LON peptidase N-terminal domain and ring finger 3                                                                                  | Homo sapiens |
| 22822  | pleckstrin homology-like domain, family A, member 1                                                                                | Homo sapiens |
| 6731   | signal recognition particle 72kDa                                                                                                  | Homo sapiens |
| 3052   | holocytochrome c synthase (cytochrome c heme-lyase)                                                                                | Homo sapiens |
| 79885  | histone deacetylase 11                                                                                                             | Homo sapiens |
| 26005  | C2 calcium-dependent domain containing 3                                                                                           | Homo sapiens |
| 4487   | msh homeobox 1                                                                                                                     | Homo sapiens |
| 51130  | ankyrin repeat and SOCS box-containing 3                                                                                           | Homo sapiens |
| 51106  | transcription factor B1, mitochondrial                                                                                             | Homo sapiens |
| 8577   | transmembrane protein with EGF-like and two follistatin-like domains 1; chromosome 9 open reading frame 30; hypothetical LOC729538 | Homo sapiens |
| 91283  | transmembrane protein with EGF-like and two follistatin-like domains 1; chromosome 9 open reading frame 30; hypothetical LOC729538 | Homo sapiens |
| 2956   | mutS homolog 6 ( <i>E. coli</i> )                                                                                                  | Homo sapiens |
| 23040  | myelin transcription factor 1-like                                                                                                 | Homo sapiens |
| 9145   | synaptogyrin 1                                                                                                                     | Homo sapiens |
| 51255  | ring finger protein 181                                                                                                            | Homo sapiens |
| 138241 | chromosome 9 open reading frame 85                                                                                                 | Homo sapiens |
| 7532   | tyrosine 3-monooxygenase/tryptophan 5-monooxygenase activation protein, gamma polypeptide                                          | Homo sapiens |
| 55290  | BRF2, subunit of RNA polymerase III transcription initiation factor, BRF1-like                                                     | Homo sapiens |
| 6206   | ribosomal protein S12; ribosomal protein S12 pseudogene 4; ribosomal protein S12 pseudogene 11; ribosomal protein S12 pseudogene 9 | Homo sapiens |
| 6622   | synuclein, alpha (non A4 component of amyloid precursor)                                                                           | Homo sapiens |
| 79178  | thiamine triphosphatase                                                                                                            | Homo sapiens |
| 51053  | geminin, DNA replication inhibitor                                                                                                 | Homo sapiens |
| 23248  | regulation of nuclear pre-mRNA domain containing 2                                                                                 | Homo sapiens |
| 399821 | FLJ37035 protein                                                                                                                   | Homo sapiens |
| 10082  | glypican 6                                                                                                                         | Homo sapiens |
| 55253  | tRNA-yW synthesizing protein 1 homolog ( <i>S. cerevisiae</i> )                                                                    | Homo sapiens |
| 10171  | RNA terminal phosphate cyclase-like 1                                                                                              | Homo sapiens |
| 63908  | N-ethylmaleimide-sensitive factor attachment protein, beta                                                                         | Homo sapiens |
| 23543  | RNA binding motif protein 9                                                                                                        | Homo sapiens |
| 1965   | eukaryotic translation initiation factor 2, subunit 1 alpha, 35kDa                                                                 | Homo sapiens |
| 1345   | cytochrome c oxidase subunit VIc                                                                                                   | Homo sapiens |
| 51363  | carbohydrate (N-acetylgalactosamine 4-sulfate 6-O) sulfotransferase 15                                                             | Homo sapiens |

|        |                                                                                                                                  |              |
|--------|----------------------------------------------------------------------------------------------------------------------------------|--------------|
| 2776   | guanine nucleotide binding protein (G protein), q polypeptide                                                                    | Homo sapiens |
| 54520  | coiled-coil domain containing 93                                                                                                 | Homo sapiens |
| 65985  | acetoacetyl-CoA synthetase                                                                                                       | Homo sapiens |
| 10381  | tubulin, beta 3; melanocortin 1 receptor (alpha melanocyte stimulating hormone receptor)                                         | Homo sapiens |
| 57085  | angiotensin II receptor-associated protein                                                                                       | Homo sapiens |
| 161    | adaptor-related protein complex 2, alpha 2 subunit                                                                               | Homo sapiens |
| 9112   | metastasis associated 1                                                                                                          | Homo sapiens |
| 78990  | OTU domain, ubiquitin aldehyde binding 2                                                                                         | Homo sapiens |
| 55751  | transmembrane protein 184C                                                                                                       | Homo sapiens |
| 79725  | THAP domain containing 9                                                                                                         | Homo sapiens |
| 353116 | Rab interacting lysosomal protein-like 1                                                                                         | Homo sapiens |
| 729013 | hypothetical protein LOC729013                                                                                                   | Homo sapiens |
| 5316   | PBX/knotted 1 homeobox 1                                                                                                         | Homo sapiens |
| 256302 | chromosome 17 open reading frame 103                                                                                             | Homo sapiens |
| 10940  | processing of precursor 1, ribonuclease P/MRP subunit ( <i>S. cerevisiae</i> )                                                   | Homo sapiens |
| 54455  | F-box protein 42                                                                                                                 | Homo sapiens |
| 93663  | Rho GTPase activating protein 18                                                                                                 | Homo sapiens |
| 6152   | ribosomal protein L24; ribosomal protein L24 pseudogene 6                                                                        | Homo sapiens |
| 22919  | microtubule-associated protein, RP/EB family, member 1                                                                           | Homo sapiens |
| 55748  | CNDP dipeptidase 2 (metallopeptidase M20 family)                                                                                 | Homo sapiens |
| 27316  | similar to RNA binding motif protein, X-linked; similar to hCG2011544; RNA binding motif protein, X-linked                       | Homo sapiens |
| 5194   | peroxisomal biogenesis factor 13                                                                                                 | Homo sapiens |
| 22974  | TPX2, microtubule-associated, homolog ( <i>Xenopus laevis</i> )                                                                  | Homo sapiens |
| 5530   | protein phosphatase 3 (formerly 2B), catalytic subunit, alpha isoform                                                            | Homo sapiens |
| 157693 | similar to hCG1735895; family with sequence similarity 87, member B; family with sequence similarity 87, member A                | Homo sapiens |
| 54497  | HEAT repeat containing 5B                                                                                                        | Homo sapiens |
| 286272 | hypothetical protein LOC286272                                                                                                   | Homo sapiens |
| 26512  | integrator complex subunit 6                                                                                                     | Homo sapiens |
| 84079  | ankyrin repeat domain 27 (VPS9 domain)                                                                                           | Homo sapiens |
| 116448 | oligodendrocyte transcription factor 1                                                                                           | Homo sapiens |
| 51447  | inositol hexakisphosphate kinase 2                                                                                               | Homo sapiens |
| 29952  | dipeptidyl-peptidase 7                                                                                                           | Homo sapiens |
| 57226  | LYR motif containing 2                                                                                                           | Homo sapiens |
| 51667  | negative regulator of ubiquitin-like proteins 1                                                                                  | Homo sapiens |
| 84836  | abhydrolase domain containing 14B                                                                                                | Homo sapiens |
| 57407  | NmrA-like family domain containing 1                                                                                             | Homo sapiens |
| 27344  | proprotein convertase subtilisin/kexin type 1 inhibitor                                                                          | Homo sapiens |
| 389170 | leucine, glutamate and lysine rich 1                                                                                             | Homo sapiens |
| 5550   | prolyl endopeptidase                                                                                                             | Homo sapiens |
| 11015  | KDEL (Lys-Asp-Glu-Leu) endoplasmic reticulum protein retention receptor 3                                                        | Homo sapiens |
| 993    | cell division cycle 25 homolog A ( <i>S. pombe</i> )                                                                             | Homo sapiens |
| 84552  | par-6 partitioning defective 6 homolog gamma ( <i>C. elegans</i> )                                                               | Homo sapiens |
| 3236   | homeobox D10                                                                                                                     | Homo sapiens |
| 84248  | forty-two-three domain containing 1                                                                                              | Homo sapiens |
| 9416   | DEAD (Asp-Glu-Ala-Asp) box polypeptide 23                                                                                        | Homo sapiens |
| 117854 | TRIM6-TRIM34 readthrough transcript; tripartite motif-containing 6; tripartite motif-containing 34                               | Homo sapiens |
| 1745   | distal-less homeobox 1                                                                                                           | Homo sapiens |
| 127253 | tRNA-yW synthesizing protein 3 homolog ( <i>S. cerevisiae</i> )                                                                  | Homo sapiens |
| 79005  | sodium channel modifier 1                                                                                                        | Homo sapiens |
| 8683   | splicing factor, arginine/serine-rich 9                                                                                          | Homo sapiens |
| 51454  | GULP, engulfment adaptor PTB domain containing 1                                                                                 | Homo sapiens |
| 56898  | 3-hydroxybutyrate dehydrogenase, type 2                                                                                          | Homo sapiens |
| 23524  | serine/arginine repetitive matrix 2; hypothetical LOC100132779                                                                   | Homo sapiens |
| 162972 | zinc finger protein 550                                                                                                          | Homo sapiens |
| 7430   | hypothetical protein LOC100129652; ezrin                                                                                         | Homo sapiens |
| 54969  | chromosome 4 open reading frame 27                                                                                               | Homo sapiens |
| 9442   | similar to cofactor required for Spl transcriptional activation, subunit 8, 34kDa; mediator complex subunit 27; CRSP8 pseudogene | Homo sapiens |
| 133746 | junction mediating and regulatory protein, p53 cofactor                                                                          | Homo sapiens |
| 9545   | RAB3D, member RAS oncogene family                                                                                                | Homo sapiens |
| 23125  | calmodulin binding transcription activator 2                                                                                     | Homo sapiens |
| 56905  | chromosome 15 open reading frame 39                                                                                              | Homo sapiens |
| 51185  | cereblon                                                                                                                         | Homo sapiens |
| 5438   | polymerase (RNA) II (DNA directed) polypeptide I, 14.5kDa                                                                        | Homo sapiens |
| 1736   | dyskeratosis congenita 1, dyskerin                                                                                               | Homo sapiens |
| 339804 | chromosome 2 open reading frame 74                                                                                               | Homo sapiens |
| 80335  | WD repeat domain 82                                                                                                              | Homo sapiens |
| 5387   | postmeiotic segregation increased 2-like 3; zinc finger protein 12                                                               | Homo sapiens |
| 7559   | postmeiotic segregation increased 2-like 3; zinc finger protein 12                                                               | Homo sapiens |
| 439938 | hypothetical gene supported by NM_178534                                                                                         | Homo sapiens |
| 129138 | ankyrin repeat domain 54                                                                                                         | Homo sapiens |
| 182    | jagged 1 (Alagille syndrome)                                                                                                     | Homo sapiens |
| 114803 | Myb-like, SWIRM and MPN domains 1                                                                                                | Homo sapiens |
| 3376   | isoleucyl-tRNA synthetase                                                                                                        | Homo sapiens |

|        |                                                                                                                    |              |
|--------|--------------------------------------------------------------------------------------------------------------------|--------------|
| 10301  | deleted in lymphocytic leukemia 1 (non-protein coding)                                                             | Homo sapiens |
| 9334   | UDP-Gal:betaGlcNAc beta 1,4- galactosyltransferase, polypeptide 5                                                  | Homo sapiens |
| 83695  | chromosome 12 open reading frame 32                                                                                | Homo sapiens |
| 10549  | peroxiredoxin 4                                                                                                    | Homo sapiens |
| 80013  | chromosome 10 open reading frame 97                                                                                | Homo sapiens |
| 166785 | methylmalonic aciduria (cobalamin deficiency) cblA type                                                            | Homo sapiens |
| 146050 | zinc finger and SCAN domain containing 29                                                                          | Homo sapiens |
| 29066  | zinc finger CCCH-type containing 7A                                                                                | Homo sapiens |
| 26985  | adaptor-related protein complex 3, mu 1 subunit                                                                    | Homo sapiens |
| 55266  | transmembrane protein 19                                                                                           | Homo sapiens |
| 51616  | TAF9B RNA polymerase II, TATA box binding protein (TBP)-associated factor, 31kDa                                   | Homo sapiens |
| 1462   | versican                                                                                                           | Homo sapiens |
| 4085   | MAD2 mitotic arrest deficient-like 1 (yeast)                                                                       | Homo sapiens |
| 3146   | high-mobility group box 1; high-mobility group box 1-like 10                                                       | Homo sapiens |
| 57117  | integrator complex subunit 12                                                                                      | Homo sapiens |
| 4154   | muscleblind-like (Drosophila)                                                                                      | Homo sapiens |
| 2230   | ferredoxin 1                                                                                                       | Homo sapiens |
| 3309   | hypothetical gene supported by AF216292; NM_005347; heat shock 70kDa protein 5 (glucose-regulated protein, 78kDa)  | Homo sapiens |
| 64432  | mitochondrial ribosomal protein S25                                                                                | Homo sapiens |
| 27341  | ribosomal RNA processing 7 homolog B (S. cerevisiae); ribosomal RNA processing 7 homolog A (S. cerevisiae)         | Homo sapiens |
| 162239 | zinc finger protein 1 homolog (mouse)                                                                              | Homo sapiens |
| 4297   | myeloid/lymphoid or mixed-lineage leukemia (trithorax homolog, Drosophila)                                         | Homo sapiens |
| 64434  | nucleolar protein with MIF4G domain 1                                                                              | Homo sapiens |
| 57106  | N-acetyltransferase 14 (GCN5-related, putative)                                                                    | Homo sapiens |
| 79567  | family with sequence similarity 65, member A                                                                       | Homo sapiens |
| 10127  | zinc finger protein 263                                                                                            | Homo sapiens |
| 51232  | cysteine rich transmembrane BMP regulator 1 (chordin-like)                                                         | Homo sapiens |
| 8790   | TNNI3 interacting kinase; fucose-1-phosphate guanylyltransferase                                                   | Homo sapiens |
| 1676   | DNA fragmentation factor, 45kDa, alpha polypeptide                                                                 | Homo sapiens |
| 79731  | asparaginyl-tRNA synthetase 2, mitochondrial (putative)                                                            | Homo sapiens |
| 79711  | importin 4                                                                                                         | Homo sapiens |
| 54529  | asparagine synthetase domain containing 1                                                                          | Homo sapiens |
| 360023 | zinc finger and BTB domain containing 41                                                                           | Homo sapiens |
| 57720  | G protein-coupled receptor 107                                                                                     | Homo sapiens |
| 287    | ankyrin 2, neuronal                                                                                                | Homo sapiens |
| 10109  | actin related protein 2/3 complex, subunit 2, 34kDa                                                                | Homo sapiens |
| 8445   | dual-specificity tyrosine-(Y)-phosphorylation regulated kinase 2                                                   | Homo sapiens |
| 79066  | methyltransferase 10 domain containing                                                                             | Homo sapiens |
| 59349  | kelch-like 12 (Drosophila)                                                                                         | Homo sapiens |
| 8544   | pirin (iron-binding nuclear protein)                                                                               | Homo sapiens |
| 5981   | replication factor C (activator 1) 1, 145kDa                                                                       | Homo sapiens |
| 644596 | non-protein coding RNA 86; non-protein coding RNA 87                                                               | Homo sapiens |
| 399668 | non-protein coding RNA 86; non-protein coding RNA 87                                                               | Homo sapiens |
| 472    | similar to Serine-protein kinase ATM (Ataxia telangiectasia mutated) (A-T, mutated); ataxia telangiectasia mutated | Homo sapiens |
| 80315  | cytoplasmic polyadenylation element binding protein 4                                                              | Homo sapiens |
| 11007  | coiled-coil domain containing 85B                                                                                  | Homo sapiens |
| 57154  | SMAD specific E3 ubiquitin protein ligase 1                                                                        | Homo sapiens |
| 8934   | RAB7, member RAS oncogene family-like 1                                                                            | Homo sapiens |
| 3836   | karyopherin alpha 1 (importin alpha 5)                                                                             | Homo sapiens |
| 57711  | zinc finger protein 529                                                                                            | Homo sapiens |
| 51710  | zinc finger protein 44                                                                                             | Homo sapiens |
| 27436  | echinoderm microtubule associated protein like 4                                                                   | Homo sapiens |
| 8668   | eukaryotic translation initiation factor 3, subunit I                                                              | Homo sapiens |
| 80067  | chromosome 2 open reading frame 37                                                                                 | Homo sapiens |
| 128338 | DNA-damage regulated autophagy modulator 2                                                                         | Homo sapiens |
| 8793   | tumor necrosis factor receptor superfamily, member 10d, decoy with truncated death domain                          | Homo sapiens |
| 284244 | hypothetical protein LOC284244                                                                                     | Homo sapiens |
| 54819  | zinc finger, CCHC domain containing 10                                                                             | Homo sapiens |
| 8780   | RIO kinase 3 (yeast)                                                                                               | Homo sapiens |
| 51275  | chromosome 12 open reading frame 47                                                                                | Homo sapiens |
| 81631  | microtubule-associated protein 1 light chain 3 beta                                                                | Homo sapiens |
| 5688   | proteasome (prosome, macropain) subunit, alpha type, 7                                                             | Homo sapiens |
| 51115  | family with sequence similarity 82, member B                                                                       | Homo sapiens |
| 22887  | forkhead box J3                                                                                                    | Homo sapiens |
| 56977  | storkhead box 2                                                                                                    | Homo sapiens |
| 25842  | ASF1 anti-silencing function 1 homolog A (S. cerevisiae)                                                           | Homo sapiens |
| 166647 | G protein-coupled receptor 125                                                                                     | Homo sapiens |
| 55070  | de-etiolated homolog 1 (Arabidopsis)                                                                               | Homo sapiens |
| 3597   | interleukin 13 receptor, alpha 1                                                                                   | Homo sapiens |
| 3219   | homeobox B9                                                                                                        | Homo sapiens |
| 83468  | glycosyltransferase 8 domain containing 2                                                                          | Homo sapiens |
| 10799  | ribonuclease P/MRP 40kDa subunit                                                                                   | Homo sapiens |
| 9527   | golgi SNAP receptor complex member 1                                                                               | Homo sapiens |

|        |                                                                                                                                                |              |
|--------|------------------------------------------------------------------------------------------------------------------------------------------------|--------------|
| 84525  | HOP homeobox                                                                                                                                   | Homo sapiens |
| 162989 | death effector domain containing 2                                                                                                             | Homo sapiens |
| 54929  | transmembrane protein 161A                                                                                                                     | Homo sapiens |
| 26225  | ADP-ribosylation factor-like 5A                                                                                                                | Homo sapiens |
| 5887   | RAD23 homolog B ( <i>S. cerevisiae</i> )                                                                                                       | Homo sapiens |
| 23527  | ArfGAP with coiled-coil, ankyrin repeat and PH domains 2                                                                                       | Homo sapiens |
| 4172   | minichromosome maintenance complex component 3                                                                                                 | Homo sapiens |
| 55858  | transmembrane protein 165                                                                                                                      | Homo sapiens |
| 5876   | Rab geranylgeranyltransferase, beta subunit                                                                                                    | Homo sapiens |
| 23431  | adaptor-related protein complex 4, epsilon 1 subunit                                                                                           | Homo sapiens |
| 55260  | transmembrane protein 143                                                                                                                      | Homo sapiens |
| 29093  | mitochondrial ribosomal protein L22                                                                                                            | Homo sapiens |
| 51715  | RAB23, member RAS oncogene family                                                                                                              | Homo sapiens |
| 9632   | SEC24 family, member C ( <i>S. cerevisiae</i> )                                                                                                | Homo sapiens |
| 2878   | glutathione peroxidase 3 (plasma)                                                                                                              | Homo sapiens |
| 8890   | eukaryotic translation initiation factor 2B, subunit 4 delta, 67kDa                                                                            | Homo sapiens |
| 619279 | zinc finger protein 704                                                                                                                        | Homo sapiens |
| 9519   | TBP-like 1                                                                                                                                     | Homo sapiens |
| 55346  | t-complex 11 (mouse)-like 1                                                                                                                    | Homo sapiens |
| 441212 | retinitis pigmentosa 9 pseudogene                                                                                                              | Homo sapiens |
| 22889  | KIAA0907                                                                                                                                       | Homo sapiens |
| 10657  | KH domain containing, RNA binding, signal transduction associated 1                                                                            | Homo sapiens |
| 284593 | family with sequence similarity 41, member C                                                                                                   | Homo sapiens |
| 5422   | polymerase (DNA directed), alpha 1, catalytic subunit                                                                                          | Homo sapiens |
| 29105  | chromosome 16 open reading frame 80                                                                                                            | Homo sapiens |
| 1105   | chromodomain helicase DNA binding protein 1                                                                                                    | Homo sapiens |
| 2260   | fibroblast growth factor receptor 1                                                                                                            | Homo sapiens |
| 92675  | histidyl-tRNA synthetase 2, mitochondrial (putative); D-tyrosyl-tRNA deacylase 1 homolog ( <i>S. cerevisiae</i> )                              | Homo sapiens |
| 11177  | bromodomain adjacent to zinc finger domain, 1A                                                                                                 | Homo sapiens |
| 25932  | chloride intracellular channel 4                                                                                                               | Homo sapiens |
| 4637   | myosin, light chain 6, alkali, smooth muscle and non-muscle                                                                                    | Homo sapiens |
| 85021  | RALBP1 associated Eps domain containing 1                                                                                                      | Homo sapiens |
| 404672 | general transcription factor IIH, polypeptide 5                                                                                                | Homo sapiens |
| 3206   | homeobox A10                                                                                                                                   | Homo sapiens |
| 93099  | dermokine                                                                                                                                      | Homo sapiens |
| 1033   | cyclin-dependent kinase inhibitor 3                                                                                                            | Homo sapiens |
| 124540 | musashi homolog 2 ( <i>Drosophila</i> )                                                                                                        | Homo sapiens |
| 157567 | ankyrin repeat domain 46                                                                                                                       | Homo sapiens |
| 2941   | glutathione S-transferase alpha 4                                                                                                              | Homo sapiens |
| 51154  | mRNA turnover 4 homolog ( <i>S. cerevisiae</i> )                                                                                               | Homo sapiens |
| 9975   | nuclear receptor subfamily 1, group D, member 2                                                                                                | Homo sapiens |
| 284942 | ribosomal protein L23a pseudogene 25; ribosomal protein L23a pseudogene 82                                                                     | Homo sapiens |
| 949    | scavenger receptor class B, member 1                                                                                                           | Homo sapiens |
| 4728   | NADH dehydrogenase (ubiquinone) Fe-S protein 8, 23kDa (NADH-coenzyme Q reductase)                                                              | Homo sapiens |
| 10314  | LanC lantibiotic synthetase component C-like 1 (bacterial)                                                                                     | Homo sapiens |
| 54859  | chromosome 3 open reading frame 75                                                                                                             | Homo sapiens |
| 79954  | nucleolar protein 10                                                                                                                           | Homo sapiens |
| 4659   | protein phosphatase 1, regulatory (inhibitor) subunit 12A                                                                                      | Homo sapiens |
| 9908   | GTPase activating protein (SH3 domain) binding protein 2                                                                                       | Homo sapiens |
| 23095  | kinesin family member 1B                                                                                                                       | Homo sapiens |
| 7117   | thymosin-like 3                                                                                                                                | Homo sapiens |
| 9749   | phosphatase and actin regulator 2                                                                                                              | Homo sapiens |
| 9124   | PDZ and LIM domain 1                                                                                                                           | Homo sapiens |
| 203068 | tubulin, beta; similar to tubulin, beta 5; tubulin, beta pseudogene 2; tubulin, beta pseudogene 1                                              | Homo sapiens |
| 4082   | myristoylated alanine-rich protein kinase C substrate                                                                                          | Homo sapiens |
| 2752   | glutamate-ammonia ligase (glutamine synthetase)                                                                                                | Homo sapiens |
| 54433  | GAR1 ribonucleoprotein homolog (yeast)                                                                                                         | Homo sapiens |
| 64839  | F-box and leucine-rich repeat protein 17                                                                                                       | Homo sapiens |
| 79147  | fukutin related protein                                                                                                                        | Homo sapiens |
| 7355   | solute carrier family 35 (UDP-galactose transporter), member A2                                                                                | Homo sapiens |
| 26061  | 2-hydroxyacyl-CoA lyase 1                                                                                                                      | Homo sapiens |
| 55776  | chromosome 6 open reading frame 64                                                                                                             | Homo sapiens |
| 2821   | glucose phosphate isomerase                                                                                                                    | Homo sapiens |
| 55055  | Zwilch, kinetochore associated, homolog ( <i>Drosophila</i> )                                                                                  | Homo sapiens |
| 11158  | RAB, member of RAS oncogene family-like 2B                                                                                                     | Homo sapiens |
| 10206  | tripartite motif-containing 13                                                                                                                 | Homo sapiens |
| 283459 | glutamyl-tRNA(Gln) amidotransferase, subunit C homolog (bacterial)                                                                             | Homo sapiens |
| 116092 | deoxynucleotidyltransferase, terminal, interacting protein 1                                                                                   | Homo sapiens |
| 81926  | family with sequence similarity 108, member A4; family with sequence similarity 108, member A5; family with sequence similarity 108, member A1 | Homo sapiens |
| 147694 | zinc finger protein 548                                                                                                                        | Homo sapiens |
| 1894   | epithelial cell transforming sequence 2 oncogene                                                                                               | Homo sapiens |
| 8870   | immediate early response 3                                                                                                                     | Homo sapiens |
| 65981  | caprin family member 2                                                                                                                         | Homo sapiens |
| 205327 | chromosome 2 open reading frame 69                                                                                                             | Homo sapiens |

|        |                                                                                                                                                                                                                                      |              |
|--------|--------------------------------------------------------------------------------------------------------------------------------------------------------------------------------------------------------------------------------------|--------------|
| 54788  | DnaJ (Hsp40) homolog, subfamily B, member 12                                                                                                                                                                                         | Homo sapiens |
| 30845  | EH-domain containing 3                                                                                                                                                                                                               | Homo sapiens |
| 84678  | lysine (K)-specific demethylase 2B                                                                                                                                                                                                   | Homo sapiens |
| 23623  | RUN and SH3 domain containing 1                                                                                                                                                                                                      | Homo sapiens |
| 744    | metallophosphoesterase domain containing 2                                                                                                                                                                                           | Homo sapiens |
| 80311  | kelch-like 15 (Drosophila)                                                                                                                                                                                                           | Homo sapiens |
| 596    | B-cell CLL/lymphoma 2                                                                                                                                                                                                                | Homo sapiens |
| 4488   | msh homeobox 2                                                                                                                                                                                                                       | Homo sapiens |
| 983    | cell division cycle 2, G1 to S and G2 to M                                                                                                                                                                                           | Homo sapiens |
| 10963  | stress-induced-phosphoprotein 1                                                                                                                                                                                                      | Homo sapiens |
| 7913   | DEK oncogene                                                                                                                                                                                                                         | Homo sapiens |
| 509    | ATP synthase, H+ transporting, mitochondrial F1 complex, gamma polypeptide 1                                                                                                                                                         | Homo sapiens |
| 3638   | insulin induced gene 1                                                                                                                                                                                                               | Homo sapiens |
| 57475  | pleckstrin homology domain containing, family H (with MyTH4 domain) member 1                                                                                                                                                         | Homo sapiens |
| 23172  | family with sequence similarity 175, member B                                                                                                                                                                                        | Homo sapiens |
| 2348   | folate receptor 1 (adult)                                                                                                                                                                                                            | Homo sapiens |
| 387509 | G protein-coupled receptor 153                                                                                                                                                                                                       | Homo sapiens |
| 81609  | sorting nexin family member 27                                                                                                                                                                                                       | Homo sapiens |
| 4291   | myeloid leukemia factor 1                                                                                                                                                                                                            | Homo sapiens |
| 113763 | chromosome 7 open reading frame 29                                                                                                                                                                                                   | Homo sapiens |
| 85360  | synapse defective 1, Rho GTPase, homolog 1 (C. elegans)                                                                                                                                                                              | Homo sapiens |
| 271    | adenosine monophosphate deaminase 2 (isoform L)                                                                                                                                                                                      | Homo sapiens |
| 374291 | NADH dehydrogenase (ubiquinone) Fe-S protein 7, 20kDa (NADH-coenzyme Q reductase)                                                                                                                                                    | Homo sapiens |
| 5198   | phosphoribosylformylglycinamide synthase                                                                                                                                                                                             | Homo sapiens |
| 23318  | zinc finger, CCHC domain containing 11                                                                                                                                                                                               | Homo sapiens |
| 256471 | major facilitator superfamily domain containing 8                                                                                                                                                                                    | Homo sapiens |
| 285761 | discoidin, CUB and LCCL domain containing 1                                                                                                                                                                                          | Homo sapiens |
| 3643   | insulin receptor                                                                                                                                                                                                                     | Homo sapiens |
| 4124   | mannosidase, alpha, class 2A, member 1                                                                                                                                                                                               | Homo sapiens |
| 1479   | cleavage stimulation factor, 3' pre-RNA, subunit 3, 77kDa                                                                                                                                                                            | Homo sapiens |
| 54927  | coiled-coil-helix-coiled-coil-helix domain containing 3                                                                                                                                                                              | Homo sapiens |
| 3977   | leukemia inhibitory factor receptor alpha                                                                                                                                                                                            | Homo sapiens |
| 10846  | phosphodiesterase 10A                                                                                                                                                                                                                | Homo sapiens |
| 9175   | mitogen-activated protein kinase kinase kinase 13                                                                                                                                                                                    | Homo sapiens |
| 120227 | cytochrome P450, family 2, subfamily R, polypeptide 1                                                                                                                                                                                | Homo sapiens |
| 658    | bone morphogenetic protein receptor, type IB                                                                                                                                                                                         | Homo sapiens |
| 26994  | ring finger protein 11                                                                                                                                                                                                               | Homo sapiens |
| 9636   | ISG15 ubiquitin-like modifier                                                                                                                                                                                                        | Homo sapiens |
| 729092 | ArfGAP with GTPase domain, ankyrin repeat and PH domain 5; ArfGAP with GTPase domain, ankyrin repeat and PH domain 9; ArfGAP with GTPase domain, ankyrin repeat and PH domain 10; centaurin, gamma-like family, member 11 pseudogene | Homo sapiens |
| 728127 | ArfGAP with GTPase domain, ankyrin repeat and PH domain 5; ArfGAP with GTPase domain, ankyrin repeat and PH domain 9; ArfGAP with GTPase domain, ankyrin repeat and PH domain 10; centaurin, gamma-like family, member 11 pseudogene | Homo sapiens |
| 642517 | ArfGAP with GTPase domain, ankyrin repeat and PH domain 5; ArfGAP with GTPase domain, ankyrin repeat and PH domain 9; ArfGAP with GTPase domain, ankyrin repeat and PH domain 10; centaurin, gamma-like family, member 11 pseudogene | Homo sapiens |
| 51073  | mitochondrial ribosomal protein L4                                                                                                                                                                                                   | Homo sapiens |
| 26586  | cytoskeleton associated protein 2                                                                                                                                                                                                    | Homo sapiens |
| 57175  | coronin, actin binding protein, 1B                                                                                                                                                                                                   | Homo sapiens |
| 9724   | UTP14, U3 small nucleolar ribonucleoprotein, homolog C (yeast); asparagine-linked glycosylation 11, alpha-1,2-mannosyltransferase homolog (yeast)                                                                                    | Homo sapiens |
| 84085  | F-box protein 30                                                                                                                                                                                                                     | Homo sapiens |
| 10438  | CID nuclear receptor co-repressor; similar to nuclear DNA-binding protein; similar to hCG1791993                                                                                                                                     | Homo sapiens |
| 54978  | chromosome 2 open reading frame 18                                                                                                                                                                                                   | Homo sapiens |
| 754    | pituitary tumor-transforming 1 interacting protein                                                                                                                                                                                   | Homo sapiens |
| 27332  | zinc finger protein 638                                                                                                                                                                                                              | Homo sapiens |
| 9805   | secernin 1                                                                                                                                                                                                                           | Homo sapiens |
| 9848   | microfibrillar-associated protein 3-like                                                                                                                                                                                             | Homo sapiens |
| 9101   | ubiquitin specific peptidase 8                                                                                                                                                                                                       | Homo sapiens |
| 51230  | PHD finger protein 20                                                                                                                                                                                                                | Homo sapiens |
| 7398   | ubiquitin specific peptidase 1                                                                                                                                                                                                       | Homo sapiens |
| 257407 | chromosome 2 open reading frame 72                                                                                                                                                                                                   | Homo sapiens |
| 283464 | glycosyltransferase 8 domain containing 3                                                                                                                                                                                            | Homo sapiens |
| 112840 | WD repeat domain 89                                                                                                                                                                                                                  | Homo sapiens |
| 4478   | moesin                                                                                                                                                                                                                               | Homo sapiens |
| 83604  | transmembrane protein 47                                                                                                                                                                                                             | Homo sapiens |
| 51312  | solute carrier family 25, member 37                                                                                                                                                                                                  | Homo sapiens |
| 85458  | DIX domain containing 1                                                                                                                                                                                                              | Homo sapiens |
| 60558  | GUF1 GTPase homolog (S. cerevisiae)                                                                                                                                                                                                  | Homo sapiens |
| 60682  | small ArfGAP 1                                                                                                                                                                                                                       | Homo sapiens |
| 27292  | DIM1 dimethyladenosine transferase 1-like (S. cerevisiae)                                                                                                                                                                            | Homo sapiens |
| 51429  | sorting nexin 9                                                                                                                                                                                                                      | Homo sapiens |
| 22850  | ADNP homeobox 2                                                                                                                                                                                                                      | Homo sapiens |
| 57404  | cytochrome P450, family 20, subfamily A, polypeptide 1                                                                                                                                                                               | Homo sapiens |
| 6223   | ribosomal protein S19 pseudogene 3; ribosomal protein S19                                                                                                                                                                            | Homo sapiens |

|        |                                                                                                                                                                     |              |
|--------|---------------------------------------------------------------------------------------------------------------------------------------------------------------------|--------------|
| 222223 | KIAA1324-like                                                                                                                                                       | Homo sapiens |
| 64975  | mitochondrial ribosomal protein L41                                                                                                                                 | Homo sapiens |
| 84984  | chromosome 3 open reading frame 34                                                                                                                                  | Homo sapiens |
| 5701   | proteasome (prosome, macropain) 26S subunit, ATPase, 2                                                                                                              | Homo sapiens |
| 27075  | tetraspanin 13                                                                                                                                                      | Homo sapiens |
| 29796  | ubiquinol-cytochrome c reductase complex (7.2 kd)                                                                                                                   | Homo sapiens |
| 115752 | DIS3 mitotic control homolog (S. cerevisiae)-like                                                                                                                   | Homo sapiens |
| 51067  | tyrosyl-tRNA synthetase 2, mitochondrial                                                                                                                            | Homo sapiens |
| 90480  | growth arrest and DNA-damage-inducible, gamma interacting protein 1                                                                                                 | Homo sapiens |
| 91     | activin A receptor, type IB                                                                                                                                         | Homo sapiens |
| 54732  | transmembrane emp24 protein transport domain containing 9                                                                                                           | Homo sapiens |
| 29940  | dermatan sulfate epimerase                                                                                                                                          | Homo sapiens |
| 93622  | hypothetical LOC93622                                                                                                                                               | Homo sapiens |
| 54707  | GPN-loop GTPase 2                                                                                                                                                   | Homo sapiens |
| 81537  | sphingosine-1-phosphate phosphatase 1                                                                                                                               | Homo sapiens |
| 51324  | spastic paraplegia 21 (autosomal recessive, Mast syndrome)                                                                                                          | Homo sapiens |
| 84057  | meiotic nuclear divisions 1 homolog (S. cerevisiae)                                                                                                                 | Homo sapiens |
| 23051  | zinc fingers and homeoboxes 3                                                                                                                                       | Homo sapiens |
| 57224  | NHS-like 1                                                                                                                                                          | Homo sapiens |
| 23424  | tudor domain containing 7                                                                                                                                           | Homo sapiens |
| 53944  | casein kinase 1, gamma 1                                                                                                                                            | Homo sapiens |
| 22826  | DnaJ (Hsp40) homolog, subfamily C, member 8                                                                                                                         | Homo sapiens |
| 7153   | topoisomerase (DNA) II alpha 170kDa                                                                                                                                 | Homo sapiens |
| 3066   | histone deacetylase 2                                                                                                                                               | Homo sapiens |
| 6284   | S100 calcium binding protein A13                                                                                                                                    | Homo sapiens |
| 57157  | putative homeodomain transcription factor 2                                                                                                                         | Homo sapiens |
| 84769  | MPV17 mitochondrial membrane protein-like 2                                                                                                                         | Homo sapiens |
| 79634  | secernin 3                                                                                                                                                          | Homo sapiens |
| 57161  | pellino homolog 2 (Drosophila)                                                                                                                                      | Homo sapiens |
| 521    | ATP synthase, H+ transporting, mitochondrial F0 complex, subunit E                                                                                                  | Homo sapiens |
| 84131  | centrosomal protein 78kDa                                                                                                                                           | Homo sapiens |
| 9328   | general transcription factor IIIC, polypeptide 5, 63kDa                                                                                                             | Homo sapiens |
| 8100   | intraflagellar transport 88 homolog (Chlamydomonas)                                                                                                                 | Homo sapiens |
| 8614   | stanniocalcin 2                                                                                                                                                     | Homo sapiens |
| 11216  | A kinase (PRKA) anchor protein 10                                                                                                                                   | Homo sapiens |
| 10079  | ATPase, class II, type 9A                                                                                                                                           | Homo sapiens |
| 27000  | DnaJ (Hsp40) homolog, subfamily C, member 2                                                                                                                         | Homo sapiens |
| 112752 | chromosome 14 open reading frame 179                                                                                                                                | Homo sapiens |
| 9928   | kinesin family member 14                                                                                                                                            | Homo sapiens |
| 84287  | zinc finger, DHHC-type containing 16                                                                                                                                | Homo sapiens |
| 23082  | peroxisome proliferator-activated receptor gamma, coactivator-related 1                                                                                             | Homo sapiens |
| 60528  | elaC homolog 2 (E. coli)                                                                                                                                            | Homo sapiens |
| 54874  | formin binding protein 1-like                                                                                                                                       | Homo sapiens |
| 79077  | dCTP pyrophosphatase 1                                                                                                                                              | Homo sapiens |
| 54414  | sialic acid acetyltransferase                                                                                                                                       | Homo sapiens |
| 54778  | ring finger protein 111                                                                                                                                             | Homo sapiens |
| 9016   | solute carrier family 25 (mitochondrial carrier, brain), member 14                                                                                                  | Homo sapiens |
| 65986  | zinc finger and BTB domain containing 10                                                                                                                            | Homo sapiens |
| 84960  | KIAA1984; transmembrane protein 141                                                                                                                                 | Homo sapiens |
| 9025   | ring finger protein 8                                                                                                                                               | Homo sapiens |
| 57684  | zinc finger and BTB domain containing 26                                                                                                                            | Homo sapiens |
| 6730   | signal recognition particle 68kDa                                                                                                                                   | Homo sapiens |
| 8563   | THO complex 5                                                                                                                                                       | Homo sapiens |
| 63899  | NOL1/NOP2/Sun domain family, member 3                                                                                                                               | Homo sapiens |
| 23585  | transmembrane protein 50A                                                                                                                                           | Homo sapiens |
| 55131  | RNA binding motif protein 28                                                                                                                                        | Homo sapiens |
| 9925   | zinc finger and BTB domain containing 5                                                                                                                             | Homo sapiens |
| 2263   | fibroblast growth factor receptor 2                                                                                                                                 | Homo sapiens |
| 586    | branched chain aminotransferase 1, cytosolic                                                                                                                        | Homo sapiens |
| 51606  | ATPase, H+ transporting, lysosomal 50/57kDa, V1 subunit H                                                                                                           | Homo sapiens |
| 79893  | gametogenetin binding protein 2                                                                                                                                     | Homo sapiens |
| 10383  | tubulin, beta 2C                                                                                                                                                    | Homo sapiens |
| 692205 | small nucleolar RNA, C/D box 89                                                                                                                                     | Homo sapiens |
| 55660  | PRP40 pre-mRNA processing factor 40 homolog A (S. cerevisiae)                                                                                                       | Homo sapiens |
| 51602  | NOP58 ribonucleoprotein homolog (yeast)                                                                                                                             | Homo sapiens |
| 339044 | polycystic kidney disease 1 (autosomal dominant) pseudogene 1                                                                                                       | Homo sapiens |
| 55623  | THUMP domain containing 1                                                                                                                                           | Homo sapiens |
| 4088   | SMAD family member 3                                                                                                                                                | Homo sapiens |
| 7335   | ubiquitin-conjugating enzyme E2 variant 1; ubiquitin-conjugating enzyme E2 variant 1 pseudogene 2; transmembrane protein 189; TMEM189-UBE2V1 readthrough transcript | Homo sapiens |
| 387522 | ubiquitin-conjugating enzyme E2 variant 1; ubiquitin-conjugating enzyme E2 variant 1 pseudogene 2; transmembrane protein 189; TMEM189-UBE2V1 readthrough transcript | Homo sapiens |
| 387521 | ubiquitin-conjugating enzyme E2 variant 1; ubiquitin-conjugating enzyme E2 variant 1 pseudogene 2; transmembrane protein 189; TMEM189-UBE2V1 readthrough transcript | Homo sapiens |
| 392    | Rho GTPase activating protein 1                                                                                                                                     | Homo sapiens |
| 5359   | phospholipid scramblase 1                                                                                                                                           | Homo sapiens |
| 10318  | TNFAIP3 interacting protein 1                                                                                                                                       | Homo sapiens |



|        |                                                                                                                                            |              |
|--------|--------------------------------------------------------------------------------------------------------------------------------------------|--------------|
| 91574  | chromosome 12 open reading frame 65                                                                                                        | Homo sapiens |
| 8662   | eukaryotic translation initiation factor 3, subunit B                                                                                      | Homo sapiens |
| 79180  | EF-hand domain family, member D2                                                                                                           | Homo sapiens |
| 10186  | lipoma HMGIC fusion partner                                                                                                                | Homo sapiens |
| 26190  | F-box and WD repeat domain containing 2                                                                                                    | Homo sapiens |
| 401264 | hypothetical gene supported by AK095117                                                                                                    | Homo sapiens |
| 6009   | Ras homolog enriched in brain                                                                                                              | Homo sapiens |
| 6161   | small nucleolar RNA, H/ACA box 7A; small nucleolar RNA, H/ACA box 7B; ribosomal protein L32                                                | Homo sapiens |
| 148327 | cAMP responsive element binding protein 3-like 4                                                                                           | Homo sapiens |
| 9508   | ADAM metallopeptidase with thrombospondin type 1 motif, 3                                                                                  | Homo sapiens |
| 5289   | phosphoinositide-3-kinase, class 3                                                                                                         | Homo sapiens |
| 9920   | kelch repeat and BTB (POZ) domain containing 11                                                                                            | Homo sapiens |
| 201161 | centromere protein V                                                                                                                       | Homo sapiens |
| 5935   | RNA binding motif (RNP1, RRM) protein 3                                                                                                    | Homo sapiens |
| 147166 | tripartite motif-containing 16-like                                                                                                        | Homo sapiens |
| 7272   | TTK protein kinase                                                                                                                         | Homo sapiens |
| 10452  | translocase of outer mitochondrial membrane 40 homolog (yeast)                                                                             | Homo sapiens |
| 152877 | family with sequence similarity 53, member A                                                                                               | Homo sapiens |
| 51669  | transmembrane protein 66                                                                                                                   | Homo sapiens |
| 7529   | tyrosine 3-monooxygenase/tryptophan 5-monooxygenase activation protein, beta polypeptide                                                   | Homo sapiens |
| 113263 | glucocorticoid induced transcript 1                                                                                                        | Homo sapiens |
| 85002  | family with sequence similarity 86, member B2; family with sequence similarity 86, member A; family with sequence similarity 86, member B1 | Homo sapiens |
| 399664 | mex-3 homolog D (C. elegans)                                                                                                               | Homo sapiens |
| 7884   | stem-loop binding protein                                                                                                                  | Homo sapiens |
| 4537   | NADH-ubiquinone oxidoreductase chain 3                                                                                                     | Homo sapiens |
| 2960   | general transcription factor IIE, polypeptide 1, alpha 56kDa                                                                               | Homo sapiens |
| 112574 | sorting nexin 18                                                                                                                           | Homo sapiens |
| 6601   | SWI/SNF related, matrix associated, actin dependent regulator of chromatin, subfamily c, member 2                                          | Homo sapiens |
| 10049  | DnaJ (Hsp40) homolog, subfamily B, member 6                                                                                                | Homo sapiens |
| 11116  | FGFR1 oncogene partner                                                                                                                     | Homo sapiens |
| 286046 | XK, Kell blood group complex subunit-related family, member 6                                                                              | Homo sapiens |
| 5520   | protein phosphatase 2 (formerly 2A), regulatory subunit B, alpha isoform                                                                   | Homo sapiens |
| 7965   | aminoacyl tRNA synthetase complex-interacting multifunctional protein 2; stromal antigen 3-like 3                                          | Homo sapiens |
| 10113  | prolactin regulatory element binding                                                                                                       | Homo sapiens |
| 55505  | NOP10 ribonucleoprotein homolog (yeast)                                                                                                    | Homo sapiens |
| 196441 | zinc finger, C3H1-type containing                                                                                                          | Homo sapiens |
| 27101  | similar to calcyclin binding protein; calcyclin binding protein                                                                            | Homo sapiens |
| 29896  | transformer 2 alpha homolog (Drosophila)                                                                                                   | Homo sapiens |
| 54467  | ankyrin repeat and IBR domain containing 1                                                                                                 | Homo sapiens |
| 81606  | limb bud and heart development homolog (mouse)                                                                                             | Homo sapiens |
| 55536  | cell division cycle associated 7-like                                                                                                      | Homo sapiens |
| 10959  | transmembrane emp24 domain trafficking protein 2                                                                                           | Homo sapiens |
| 79591  | chromosome 10 open reading frame 76                                                                                                        | Homo sapiens |
| 2580   | cyclin G associated kinase                                                                                                                 | Homo sapiens |
| 83734  | ATG10 autophagy related 10 homolog (S. cerevisiae)                                                                                         | Homo sapiens |
| 3337   | DnaJ (Hsp40) homolog, subfamily B, member 1                                                                                                | Homo sapiens |
| 92070  | chromosome 4 open reading frame 42                                                                                                         | Homo sapiens |
| 51141  | insulin induced gene 2                                                                                                                     | Homo sapiens |
| 2531   | 3-ketodihydrospingosine reductase                                                                                                          | Homo sapiens |
| 148418 | sterile alpha motif domain containing 13                                                                                                   | Homo sapiens |
| 25836  | Nipped-B homolog (Drosophila)                                                                                                              | Homo sapiens |
| 137392 | family with sequence similarity 92, member A2; family with sequence similarity 92, member A1                                               | Homo sapiens |
| 285550 | hypothetical protein LOC285550                                                                                                             | Homo sapiens |
| 7326   | ubiquitin-conjugating enzyme E2G 1 (UBC7 homolog, yeast)                                                                                   | Homo sapiens |
| 55234  | smu-1 suppressor of mec-8 and unc-52 homolog (C. elegans)                                                                                  | Homo sapiens |
| 23061  | TBC1 domain family, member 9B (with GRAM domain)                                                                                           | Homo sapiens |
| 1523   | cut-like homeobox 1                                                                                                                        | Homo sapiens |
| 9727   | RAB11 family interacting protein 3 (class II)                                                                                              | Homo sapiens |
| 53938  | peptidylprolyl isomerase (cyclophilin)-like 3                                                                                              | Homo sapiens |
| 57484  | ring finger protein 150                                                                                                                    | Homo sapiens |
| 58480  | ras homolog gene family, member U                                                                                                          | Homo sapiens |
| 901    | cyclin G2                                                                                                                                  | Homo sapiens |
| 55718  | polymerase (RNA) III (DNA directed) polypeptide E (80kD)                                                                                   | Homo sapiens |
| 151613 | tetratricopeptide repeat domain 14                                                                                                         | Homo sapiens |
| 57534  | mindbomb homolog 1 (Drosophila)                                                                                                            | Homo sapiens |
| 55013  | coiled-coil domain containing 109B                                                                                                         | Homo sapiens |
| 53373  | two pore segment channel 1                                                                                                                 | Homo sapiens |
| 150465 | tubulin tyrosine ligase                                                                                                                    | Homo sapiens |
| 4705   | NADH dehydrogenase (ubiquinone) 1 alpha subcomplex, 10, 42kDa                                                                              | Homo sapiens |
| 4338   | molybdenum cofactor synthesis 2                                                                                                            | Homo sapiens |
| 93621  | Mof4 family associated protein 1                                                                                                           | Homo sapiens |
| 57187  | THO complex 2                                                                                                                              | Homo sapiens |

|           |                                                                                         |              |
|-----------|-----------------------------------------------------------------------------------------|--------------|
| 11337     | GABA(A) receptor-associated protein                                                     | Homo sapiens |
| 23076     | ribosomal RNA processing 1 homolog B ( <i>S. cerevisiae</i> )                           | Homo sapiens |
| 8894      | eukaryotic translation initiation factor 2, subunit 2 beta, 38kDa                       | Homo sapiens |
| 8869      | ST3 beta-galactoside alpha-2,3-sialyltransferase 5                                      | Homo sapiens |
| 100188893 | translocase of outer mitochondrial membrane 6 homolog (yeast)                           | Homo sapiens |
| 9813      | KIAA0494                                                                                | Homo sapiens |
| 26039     | synovial sarcoma translocation gene on chromosome 18-like 1                             | Homo sapiens |
| 2760      | GM2 ganglioside activator                                                               | Homo sapiens |
| 826       | calpain, small subunit 1                                                                | Homo sapiens |
| 65080     | mitochondrial ribosomal protein L44                                                     | Homo sapiens |
| 149420    | PDLIM1 interacting kinase 1 like                                                        | Homo sapiens |
| 1019      | cyclin-dependent kinase 4                                                               | Homo sapiens |
| 150771    | inositol 1,4,5-triphosphate receptor interacting protein-like 1                         | Homo sapiens |
| 10813     | UTP14, U3 small nucleolar ribonucleoprotein, homolog A (yeast)                          | Homo sapiens |
| 10910     | SGT1, suppressor of G2 allele of SKP1 ( <i>S. cerevisiae</i> )                          | Homo sapiens |
| 10336     | polycomb group ring finger 3                                                            | Homo sapiens |
| 4216      | mitogen-activated protein kinase kinase kinase 4                                        | Homo sapiens |
| 8161      | coilin                                                                                  | Homo sapiens |
| 9296      | ATPase, H+ transporting, lysosomal 14kDa, V1 subunit F                                  | Homo sapiens |
| 9114      | ATPase, H+ transporting, lysosomal 38kDa, V0 subunit d1                                 | Homo sapiens |
| 56990     | CDC42 small effector 2                                                                  | Homo sapiens |
| 10528     | NOP56 ribonucleoprotein homolog (yeast)                                                 | Homo sapiens |
| 283991    | family with sequence similarity 100, member B                                           | Homo sapiens |
| 65110     | UPF3 regulator of nonsense transcripts homolog A (yeast)                                | Homo sapiens |
| 2773      | guanine nucleotide binding protein (G protein), alpha inhibiting activity polypeptide 3 | Homo sapiens |
| 10625     | influenza virus NS1A binding protein                                                    | Homo sapiens |
| 100128822 | hypothetical LOC100128822                                                               | Homo sapiens |
| 440574    | chromosome 1 open reading frame 151                                                     | Homo sapiens |
| 54619     | cyclin J                                                                                | Homo sapiens |
| 221883    | HOXA11 antisense RNA (non-protein coding)                                               | Homo sapiens |
| 51433     | anaphase promoting complex subunit 5                                                    | Homo sapiens |
| 50807     | ArfGAP with SH3 domain, ankyrin repeat and PH domain 1                                  | Homo sapiens |
| 55789     | DEP domain containing 1B                                                                | Homo sapiens |
| 283899    | INO80 complex subunit E                                                                 | Homo sapiens |
| 84804     | major facilitator superfamily domain containing 9                                       | Homo sapiens |
| 8189      | symplekin                                                                               | Homo sapiens |
| 80153     | enhancer of mRNA decapping 3 homolog ( <i>S. cerevisiae</i> )                           | Homo sapiens |
| 5828      | peroxisomal membrane protein 3, 35kDa                                                   | Homo sapiens |
| 84515     | minichromosome maintenance complex component 8                                          | Homo sapiens |
| 84134     | translocase of outer mitochondrial membrane 40 homolog (yeast)-like                     | Homo sapiens |
| 255520    | ELMO/CED-12 domain containing 2                                                         | Homo sapiens |
| 10732     | transcription factor-like 5 (basic helix-loop-helix)                                    | Homo sapiens |
| 89910     | ubiquitin protein ligase E3B                                                            | Homo sapiens |
| 10670     | Ras-related GTP binding A                                                               | Homo sapiens |
| 55829     | selenoprotein S                                                                         | Homo sapiens |
| 694       | B-cell translocation gene 1, anti-proliferative                                         | Homo sapiens |
| 6885      | mitogen-activated protein kinase kinase kinase 7                                        | Homo sapiens |
| 285636    | chromosome 5 open reading frame 51                                                      | Homo sapiens |
| 25879     | WD repeats and SOF1 domain containing                                                   | Homo sapiens |
| 51552     | RAB14, member RAS oncogene family                                                       | Homo sapiens |
| 55101     | ATP5S-like                                                                              | Homo sapiens |
| 5230      | phosphoglycerate kinase 1                                                               | Homo sapiens |
| 5825      | ATP-binding cassette, sub-family D (ALD), member 3                                      | Homo sapiens |
| 2700      | gap junction protein, alpha 3, 46kDa                                                    | Homo sapiens |
| 203547    | VMA21 vacuolar H+-ATPase homolog ( <i>S. cerevisiae</i> )                               | Homo sapiens |
| 5305      | phosphatidylinositol-5-phosphate 4-kinase, type II, alpha                               | Homo sapiens |
| 6873      | TAF2 RNA polymerase II, TATA box binding protein (TBP)-associated factor, 150kDa        | Homo sapiens |
| 4528      | mitochondrial translational initiation factor 2                                         | Homo sapiens |
| 7347      | ubiquitin carboxyl-terminal esterase L3 (ubiquitin thiolesterase)                       | Homo sapiens |
| 1654      | DEAD (Asp-Glu-Ala-Asp) box polypeptide 3, X-linked                                      | Homo sapiens |
| 84365     | MKI67 (FHA domain) interacting nucleolar phosphoprotein                                 | Homo sapiens |
| 51022     | glutaredoxin 2                                                                          | Homo sapiens |
| 9611      | nuclear receptor co-repressor 1                                                         | Homo sapiens |
| 9989      | protein phosphatase 4, regulatory subunit 1                                             | Homo sapiens |
| 25897     | ring finger protein 19A                                                                 | Homo sapiens |
| 84553     | chromosome 6 open reading frame 168                                                     | Homo sapiens |
| 171568    | polymerase (RNA) III (DNA directed) polypeptide H (22.9kD)                              | Homo sapiens |
| 60        | actin, beta                                                                             | Homo sapiens |
| 5994      | regulatory factor X-associated protein                                                  | Homo sapiens |
| 8515      | integrin, alpha 10                                                                      | Homo sapiens |
| 5616      | protein kinase, Y-linked                                                                | Homo sapiens |
| 23041     | MON2 homolog ( <i>S. cerevisiae</i> )                                                   | Homo sapiens |
| 54928     | inositol monophosphatase domain containing 1                                            | Homo sapiens |
| 4810      | Nance-Horan syndrome (congenital cataracts and dental anomalies)                        | Homo sapiens |
| 728066    | hypothetical protein MGC40405 pseudogene                                                | Homo sapiens |
| 400027    | hypothetical protein LOC400027                                                          | Homo sapiens |
| 6608      | smoothened homolog ( <i>Drosophila</i> )                                                | Homo sapiens |

|        |                                                                                                                                                                                                                                                                                                                    |              |
|--------|--------------------------------------------------------------------------------------------------------------------------------------------------------------------------------------------------------------------------------------------------------------------------------------------------------------------|--------------|
| 6041   | ribonuclease L (2',5'-oligoadenylate synthetase-dependent)                                                                                                                                                                                                                                                         | Homo sapiens |
| 84792  | chromosome 7 open reading frame 70                                                                                                                                                                                                                                                                                 | Homo sapiens |
| 27185  | disrupted in schizophrenia 1                                                                                                                                                                                                                                                                                       | Homo sapiens |
| 10552  | actin related protein 2/3 complex, subunit 1A, 41kDa                                                                                                                                                                                                                                                               | Homo sapiens |
| 7358   | UDP-glucose dehydrogenase                                                                                                                                                                                                                                                                                          | Homo sapiens |
| 23593  | heme binding protein 2                                                                                                                                                                                                                                                                                             | Homo sapiens |
| 4163   | mutated in colorectal cancers                                                                                                                                                                                                                                                                                      | Homo sapiens |
| 80816  | additional sex combs like 3 (Drosophila)                                                                                                                                                                                                                                                                           | Homo sapiens |
| 11104  | katanin p60 (ATPase-containing) subunit A 1                                                                                                                                                                                                                                                                        | Homo sapiens |
| 6400   | sel-1 suppressor of lin-12-like (C. elegans)                                                                                                                                                                                                                                                                       | Homo sapiens |
| 8560   | degenerative spermatocyte homolog 1, lipid desaturase (Drosophila)                                                                                                                                                                                                                                                 | Homo sapiens |
| 57130  | ATPase type 13A1                                                                                                                                                                                                                                                                                                   | Homo sapiens |
| 55037  | Pentatricopeptide repeat domain 3                                                                                                                                                                                                                                                                                  | Homo sapiens |
| 55727  | BTB (POZ) domain containing 7                                                                                                                                                                                                                                                                                      | Homo sapiens |
| 10238  | WD repeat domain 68                                                                                                                                                                                                                                                                                                | Homo sapiens |
| 5281   | phosphatidylinositol glycan anchor biosynthesis, class F                                                                                                                                                                                                                                                           | Homo sapiens |
| 284309 | zinc finger protein 776                                                                                                                                                                                                                                                                                            | Homo sapiens |
| 208    | v-akt murine thymoma viral oncogene homolog 2                                                                                                                                                                                                                                                                      | Homo sapiens |
| 401397 | hypothetical LOC401397                                                                                                                                                                                                                                                                                             | Homo sapiens |
| 3727   | jun D proto-oncogene                                                                                                                                                                                                                                                                                               | Homo sapiens |
| 2970   | general transcription factor II, i, pseudogene 1                                                                                                                                                                                                                                                                   | Homo sapiens |
| 285362 | sulfatase modifying factor 1                                                                                                                                                                                                                                                                                       | Homo sapiens |
| 10447  | family with sequence similarity 3, member C                                                                                                                                                                                                                                                                        | Homo sapiens |
| 169981 | spindlin family, member 3                                                                                                                                                                                                                                                                                          | Homo sapiens |
| 8314   | BRCA1 associated protein-1 (ubiquitin carboxy-terminal hydrolase)                                                                                                                                                                                                                                                  | Homo sapiens |
| 388685 | hypothetical FLJ39739                                                                                                                                                                                                                                                                                              | Homo sapiens |
| 9886   | Rho-related BTB domain containing 1                                                                                                                                                                                                                                                                                | Homo sapiens |
| 79627  | opioid growth factor receptor-like 1                                                                                                                                                                                                                                                                               | Homo sapiens |
| 55676  | solute carrier family 30 (zinc transporter), member 6                                                                                                                                                                                                                                                              | Homo sapiens |
| 58533  | sorting nexin 6                                                                                                                                                                                                                                                                                                    | Homo sapiens |
| 6307   | sterol-C4-methyl oxidase-like                                                                                                                                                                                                                                                                                      | Homo sapiens |
| 3181   | heterogeneous nuclear ribonucleoprotein A2/B1                                                                                                                                                                                                                                                                      | Homo sapiens |
| 55322  | chromosome 5 open reading frame 22                                                                                                                                                                                                                                                                                 | Homo sapiens |
| 6637   | hypothetical protein LOC100132425; similar to small nuclear ribonucleoprotein polypeptide G; small nuclear ribonucleoprotein polypeptide G; small nuclear ribonucleoprotein G-like protein                                                                                                                         | Homo sapiens |
| 440288 | similar to FLJ16518 protein                                                                                                                                                                                                                                                                                        | Homo sapiens |
| 56605  | ER01-like beta (S. cerevisiae)                                                                                                                                                                                                                                                                                     | Homo sapiens |
| 8945   | beta-transducin repeat containing                                                                                                                                                                                                                                                                                  | Homo sapiens |
| 79622  | small nuclear ribonucleoprotein 25kDa (U11/U12)                                                                                                                                                                                                                                                                    | Homo sapiens |
| 84058  | WD repeat domain 54                                                                                                                                                                                                                                                                                                | Homo sapiens |
| 116447 | topoisomerase (DNA) I, mitochondrial                                                                                                                                                                                                                                                                               | Homo sapiens |
| 10137  | RNA binding motif protein 12; copine I                                                                                                                                                                                                                                                                             | Homo sapiens |
| 6949   | Treacher Collins-Franceschetti syndrome 1                                                                                                                                                                                                                                                                          | Homo sapiens |
| 5962   | radixin                                                                                                                                                                                                                                                                                                            | Homo sapiens |
| 201163 | folliculin                                                                                                                                                                                                                                                                                                         | Homo sapiens |
| 1663   | DEAD/H (Asp-Glu-Ala-Asp/His) box polypeptide 11 (CHL1-like helicase homolog, S. cerevisiae)                                                                                                                                                                                                                        | Homo sapiens |
| 10899  | jumping translocation breakpoint                                                                                                                                                                                                                                                                                   | Homo sapiens |
| 9156   | exonuclease 1                                                                                                                                                                                                                                                                                                      | Homo sapiens |
| 92595  | zinc finger protein 764                                                                                                                                                                                                                                                                                            | Homo sapiens |
| 64843  | ISL LIM homeobox 2                                                                                                                                                                                                                                                                                                 | Homo sapiens |
| 10009  | zinc finger and BTB domain containing 33                                                                                                                                                                                                                                                                           | Homo sapiens |
| 6222   | ribosomal protein S18 pseudogene 12; ribosomal protein S18 pseudogene 5; ribosomal protein S18                                                                                                                                                                                                                     | Homo sapiens |
| 4666   | nascent polypeptide-associated complex alpha subunit                                                                                                                                                                                                                                                               | Homo sapiens |
| 10211  | flotillin 1                                                                                                                                                                                                                                                                                                        | Homo sapiens |
| 51596  | cutA divalent cation tolerance homolog (E. coli)                                                                                                                                                                                                                                                                   | Homo sapiens |
| 5861   | RAB1A, member RAS oncogene family                                                                                                                                                                                                                                                                                  | Homo sapiens |
| 51441  | YTH domain family, member 2                                                                                                                                                                                                                                                                                        | Homo sapiens |
| 7453   | tryptophanyl-tRNA synthetase                                                                                                                                                                                                                                                                                       | Homo sapiens |
| 79102  | ring finger protein 26                                                                                                                                                                                                                                                                                             | Homo sapiens |
| 25875  | LETM1 domain containing 1                                                                                                                                                                                                                                                                                          | Homo sapiens |
| 4736   | ribosomal protein L10a pseudogene 6; ribosomal protein L10a; ribosomal protein L10a pseudogene 9                                                                                                                                                                                                                   | Homo sapiens |
| 9060   | 3'-phosphoadenosine 5'-phosphosulfate synthase 2                                                                                                                                                                                                                                                                   | Homo sapiens |
| 29954  | protein-O-mannosyltransferase 2                                                                                                                                                                                                                                                                                    | Homo sapiens |
| 11123  | RCAN family member 3                                                                                                                                                                                                                                                                                               | Homo sapiens |
| 9554   | SEC22 vesicle trafficking protein homolog B (S. cerevisiae)                                                                                                                                                                                                                                                        | Homo sapiens |
| 729852 | hypothetical protein LOC729852                                                                                                                                                                                                                                                                                     | Homo sapiens |
| 9880   | zinc finger and BTB domain containing 39                                                                                                                                                                                                                                                                           | Homo sapiens |
| 60680  | bruno-like 5, RNA binding protein (Drosophila)                                                                                                                                                                                                                                                                     | Homo sapiens |
| 6187   | ribosomal protein S2 pseudogene 8; ribosomal protein S2 pseudogene 11; ribosomal protein S2 pseudogene 5; ribosomal protein S2 pseudogene 12; ribosomal protein S2 pseudogene 51; ribosomal protein S2 pseudogene 17; ribosomal protein S2 pseudogene 55; ribosomal protein S2 pseudogene 20; ribosomal protein S2 | Homo sapiens |
| 123775 | chromosome 16 open reading frame 46                                                                                                                                                                                                                                                                                | Homo sapiens |

|           |                                                                                                                                 |              |
|-----------|---------------------------------------------------------------------------------------------------------------------------------|--------------|
| 64785     | GINS complex subunit 3 (Psf3 homolog)                                                                                           | Homo sapiens |
| 6259      | RYK receptor-like tyrosine kinase                                                                                               | Homo sapiens |
| 81533     | integrin alpha FG-GAP repeat containing 1                                                                                       | Homo sapiens |
| 23753     | stromal cell-derived factor 2-like 1                                                                                            | Homo sapiens |
| 5921      | RAS p21 protein activator (GTPase activating protein) 1                                                                         | Homo sapiens |
| 284889    | hypothetical protein LOC284889                                                                                                  | Homo sapiens |
| 51522     | transmembrane protein 14C                                                                                                       | Homo sapiens |
| 57212     | KIAA0495                                                                                                                        | Homo sapiens |
| 285464    | cysteine-rich PAK1 inhibitor                                                                                                    | Homo sapiens |
| 22879     | MON1 homolog B (yeast)                                                                                                          | Homo sapiens |
| 158471    | prune homolog 2 (Drosophila)                                                                                                    | Homo sapiens |
| 51008     | activating signal cointegrator 1 complex subunit 1                                                                              | Homo sapiens |
| 3148      | high-mobility group box 2                                                                                                       | Homo sapiens |
| 403313    | phosphatidic acid phosphatase type 2 domain containing 2                                                                        | Homo sapiens |
| 4179      | CD46 molecule, complement regulatory protein                                                                                    | Homo sapiens |
| 2067      | excision repair cross-complementing rodent repair deficiency, complementation group 1 (includes overlapping antisense sequence) | Homo sapiens |
| 152573    | shisa homolog 3 (Xenopus laevis)                                                                                                | Homo sapiens |
| 57621     | zinc finger and BTB domain containing 2                                                                                         | Homo sapiens |
| 55567     | dynein, axonemal, heavy chain 3                                                                                                 | Homo sapiens |
| 202781    | hypothetical protein LOC202781                                                                                                  | Homo sapiens |
| 80298     | MTERF domain containing 3                                                                                                       | Homo sapiens |
| 23036     | zinc finger protein 292                                                                                                         | Homo sapiens |
| 79694     | mannosidase, endo-alpha                                                                                                         | Homo sapiens |
| 7109      | trafficking protein particle complex 10                                                                                         | Homo sapiens |
| 83787     | armadillo repeat containing 10                                                                                                  | Homo sapiens |
| 60468     | BTB and CNC homology 1, basic leucine zipper transcription factor 2                                                             | Homo sapiens |
| 253512    | solute carrier family 25, member 30                                                                                             | Homo sapiens |
| 136051    | zinc finger protein 786                                                                                                         | Homo sapiens |
| 152007    | GLI pathogenesis-related 2                                                                                                      | Homo sapiens |
| 64746     | acyl-Coenzyme A binding domain containing 3                                                                                     | Homo sapiens |
| 149986    | LSM14B, SCD6 homolog B (S. cerevisiae)                                                                                          | Homo sapiens |
| 5607      | mitogen-activated protein kinase kinase 5                                                                                       | Homo sapiens |
| 497661    | chromosome 18 open reading frame 32                                                                                             | Homo sapiens |
| 10277     | ubiquitination factor E4B (UFD2 homolog, yeast)                                                                                 | Homo sapiens |
| 8636      | Sjogren syndrome nuclear autoantigen 1                                                                                          | Homo sapiens |
| 8853      | ArfGAP with SH3 domain, ankyrin repeat and PH domain 2                                                                          | Homo sapiens |
| 51382     | ATPase, H+ transporting, lysosomal 34kDa, V1 subunit D                                                                          | Homo sapiens |
| 57456     | KIAA1143                                                                                                                        | Homo sapiens |
| 728153    | family with sequence similarity 133, member B pseudogene; similar to FAM133B protein;                                           | Homo sapiens |
| 257415    | family with sequence similarity 133, member B pseudogene; similar to FAM133B protein;                                           | Homo sapiens |
| 2271      | family with sequence similarity 133, member B                                                                                   | Homo sapiens |
| 8303      | family with sequence similarity 133, member B                                                                                   | Homo sapiens |
| 2176      | family with sequence similarity 133, member B                                                                                   | Homo sapiens |
| 84640     | family with sequence similarity 133, member B                                                                                   | Homo sapiens |
| 217       | fumarate hydratase                                                                                                              | Homo sapiens |
| 5116      | stannin                                                                                                                         | Homo sapiens |
| 1106      | Fanconi anemia, complementation group C                                                                                         | Homo sapiens |
| 80143     | ubiquitin specific peptidase 38                                                                                                 | Homo sapiens |
| 9354      | ubiquitin specific peptidase 38                                                                                                 | Homo sapiens |
| 100288525 | aldehyde dehydrogenase 2 family (mitochondrial)                                                                                 | Homo sapiens |
| 50809     | pericentrin                                                                                                                     | Homo sapiens |
| 723790    | chromodomain helicase DNA binding protein 2                                                                                     | Homo sapiens |
| 8337      | suppressor of IKK epsilon                                                                                                       | Homo sapiens |
| 3218      | ubiquitination factor E4A (UFD2 homolog, yeast)                                                                                 | Homo sapiens |
| 57599     | hypothetical protein LOC100288525                                                                                               | Homo sapiens |
| 7110      | heterochromatin protein 1, binding protein 3                                                                                    | Homo sapiens |
| 5654      | histone cluster 2, H2aa3; histone cluster 2, H2aa4                                                                              | Homo sapiens |
| 7879      | histone cluster 2, H2aa3; histone cluster 2, H2aa4                                                                              | Homo sapiens |
| 8533      | histone cluster 2, H2aa3; histone cluster 2, H2aa4                                                                              | Homo sapiens |
| 6303      | homeobox B8                                                                                                                     | Homo sapiens |
| 116224    | WD repeat domain 48                                                                                                             | Homo sapiens |
| 168451    | TATA element modulatory factor 1                                                                                                | Homo sapiens |
| 81624     | HtrA serine peptidase 1                                                                                                         | Homo sapiens |
| 9678      | RAB7A, member RAS oncogene family                                                                                               | Homo sapiens |
| 57673     | COP9 constitutive photomorphogenic homolog subunit 3 (Arabidopsis)                                                              | Homo sapiens |
| 54876     | spermidine/spermine N1-acetyltransferase 1                                                                                      | Homo sapiens |
| 161424    | family with sequence similarity 122A                                                                                            | Homo sapiens |
| 83999     | THAP domain containing 5                                                                                                        | Homo sapiens |
| 6945      | diaphanous homolog 3 (Drosophila)                                                                                               | Homo sapiens |
| 119032    | PHD finger protein 14                                                                                                           | Homo sapiens |
| 10766     | BEN domain containing 3                                                                                                         | Homo sapiens |
| 11143     | chromosome 4 open reading frame 30                                                                                              | Homo sapiens |
| 83932     | chromosome 14 open reading frame 21                                                                                             | Homo sapiens |
| 5899      | kringle containing transmembrane protein 1                                                                                      | Homo sapiens |
|           | MAX-like protein X                                                                                                              | Homo sapiens |
|           | chromosome 10 open reading frame 32                                                                                             | Homo sapiens |
|           | transducer of ERBB2, 2                                                                                                          | Homo sapiens |
|           | MYST histone acetyltransferase 2; similar to MYST histone acetyltransferase 2                                                   | Homo sapiens |
|           | chromosome 1 open reading frame 124                                                                                             | Homo sapiens |
|           | v-ral simian leukemia viral oncogene homolog B (ras related; GTP binding protein)                                               | Homo sapiens |

|           |                                                                                                       |              |
|-----------|-------------------------------------------------------------------------------------------------------|--------------|
| 127544    | ring finger protein 19B                                                                               | Homo sapiens |
| 79876     | ubiquitin-like modifier activating enzyme 5                                                           | Homo sapiens |
| 4306      | nuclear receptor subfamily 3, group C, member 2                                                       | Homo sapiens |
| 80071     | coiled-coil domain containing 15                                                                      | Homo sapiens |
| 100134937 | hypothetical LOC100134937                                                                             | Homo sapiens |
| 114659    | similar to hCG1991475; leucine rich repeat containing 37B                                             | Homo sapiens |
| 9266      | cytohesin 2                                                                                           | Homo sapiens |
| 64859     | oligonucleotide/oligosaccharide-binding fold containing 2A                                            | Homo sapiens |
| 4299      | AF4/FMR2 family, member 1                                                                             | Homo sapiens |
| 492311    | chromosome 5 open reading frame 53                                                                    | Homo sapiens |
| 378708    | cortistatin; apoptosis-inducing, TAF9-like domain 1                                                   | Homo sapiens |
| 79718     | transducin (beta)-like 1 X-linked receptor 1                                                          | Homo sapiens |
| 10450     | peptidylprolyl isomerase E (cyclophilin E)                                                            | Homo sapiens |
| 2729      | glutamate-cysteine ligase, catalytic subunit                                                          | Homo sapiens |
| 55213     | regulator of chromosome condensation (RCC1) and BTB (POZ) domain containing protein 1                 | Homo sapiens |
| 283933    | zinc finger protein 843                                                                               | Homo sapiens |
| 6434      | transformer 2 beta homolog (Drosophila)                                                               | Homo sapiens |
| 729683    | hypothetical protein LOC729683                                                                        | Homo sapiens |
| 400569    | mediator complex subunit 11                                                                           | Homo sapiens |
| 1453      | casein kinase 1, delta                                                                                | Homo sapiens |
| 160760    | PTC7 protein phosphatase homolog (S. cerevisiae)                                                      | Homo sapiens |
| 54930     | HAUS augmin-like complex, subunit 4                                                                   | Homo sapiens |
| 389206    | BEN domain containing 4                                                                               | Homo sapiens |
| 112812    | ferredoxin 1-like                                                                                     | Homo sapiens |
| 23307     | FK506 binding protein 15, 133kDa                                                                      | Homo sapiens |
| 6515      | solute carrier family 2 (facilitated glucose transporter), member 3                                   | Homo sapiens |
| 10897     | Yipl interacting factor homolog A (S. cerevisiae)                                                     | Homo sapiens |
| 595       | cyclin D1                                                                                             | Homo sapiens |
| 140730    | regulating synaptic membrane exocytosis 4                                                             | Homo sapiens |
| 51434     | anaphase promoting complex subunit 7                                                                  | Homo sapiens |
| 6576      | solute carrier family 25 (mitochondrial carrier; citrate transporter), member 1                       | Homo sapiens |
| 6294      | scaffold attachment factor B                                                                          | Homo sapiens |
| 27131     | sorting nexin 5                                                                                       | Homo sapiens |
| 63929     | X-prolyl aminopeptidase (aminopeptidase P) 3, putative                                                | Homo sapiens |
| 22808     | muscle RAS oncogene homolog                                                                           | Homo sapiens |
| 252969    | nei like 2 (E. coli)                                                                                  | Homo sapiens |
| 79027     | zinc finger protein 655                                                                               | Homo sapiens |
| 22985     | apoptotic chromatin condensation inducer 1                                                            | Homo sapiens |
| 49855     | S-phase cyclin A-associated protein in the ER                                                         | Homo sapiens |
| 387       | ras homolog gene family, member A                                                                     | Homo sapiens |
| 26151     | N-acetyltransferase 9 (GCN5-related, putative)                                                        | Homo sapiens |
| 4841      | non-POU domain containing, octamer-binding                                                            | Homo sapiens |
| 3298      | heat shock transcription factor 2                                                                     | Homo sapiens |
| 122416    | ankyrin repeat domain 9                                                                               | Homo sapiens |
| 91869     | RFT1 homolog (S. cerevisiae)                                                                          | Homo sapiens |
| 3460      | interferon gamma receptor 2 (interferon gamma transducer 1)                                           | Homo sapiens |
| 5514      | protein phosphatase 1, regulatory (inhibitor) subunit 10                                              | Homo sapiens |
| 283352    | hypothetical protein LOC283352                                                                        | Homo sapiens |
| 1385      | cAMP responsive element binding protein 1                                                             | Homo sapiens |
| 6168      | ribosomal protein L37a                                                                                | Homo sapiens |
| 27125     | AF4/FMR2 family, member 4                                                                             | Homo sapiens |
| 10725     | nuclear factor of activated T-cells 5, tonicity-responsive                                            | Homo sapiens |
| 5519      | protein phosphatase 2 (formerly 2A), regulatory subunit A, beta isoform                               | Homo sapiens |
| 348235    | family with sequence similarity 33, member A; similar to Spindle and kinetochore-associated protein 2 | Homo sapiens |
| 60313     | GC-rich promoter binding protein 1-like 1                                                             | Homo sapiens |
| 26086     | G-protein signaling modulator 1 (AGS3-like, C. elegans)                                               | Homo sapiens |
| 26575     | regulator of G-protein signaling 17                                                                   | Homo sapiens |
| 90411     | multiple coagulation factor deficiency 2                                                              | Homo sapiens |
| 3746      | potassium voltage-gated channel, Shaw-related subfamily, member 1                                     | Homo sapiens |
| 91694     | LON peptidase N-terminal domain and ring finger 1                                                     | Homo sapiens |
| 1373      | carbamoyl-phosphate synthetase 1, mitochondrial                                                       | Homo sapiens |
| 10542     | hepatitis B virus x interacting protein                                                               | Homo sapiens |
| 645644    | hypothetical LOC645644                                                                                | Homo sapiens |
| 2746      | glutamate dehydrogenase 1                                                                             | Homo sapiens |
| 7431      | vimentin                                                                                              | Homo sapiens |
| 8553      | basic helix-loop-helix family, member e40                                                             | Homo sapiens |
| 8776      | myotubularin related protein 1                                                                        | Homo sapiens |
| 8766      | RAB11A, member RAS oncogene family                                                                    | Homo sapiens |
| 84124     | zinc finger protein 394                                                                               | Homo sapiens |
| 7126      | tumor necrosis factor, alpha-induced protein 1 (endothelial)                                          | Homo sapiens |
| 57095     | chromosome 1 open reading frame 128                                                                   | Homo sapiens |
| 10801     | septin 9                                                                                              | Homo sapiens |
| 165215    | family with sequence similarity 171, member B                                                         | Homo sapiens |
| 342892    | zinc finger protein 850 pseudogene                                                                    | Homo sapiens |
| 1347      | cytochrome c oxidase subunit VIIa polypeptide 2 (liver)                                               | Homo sapiens |
| 6723      | spermidine synthase                                                                                   | Homo sapiens |

|           |                                                                                                                                         |              |
|-----------|-----------------------------------------------------------------------------------------------------------------------------------------|--------------|
| 55288     | ras homolog gene family, member T1                                                                                                      | Homo sapiens |
| 9644      | SH3 and PX domains 2A                                                                                                                   | Homo sapiens |
| 2889      | Rap guanine nucleotide exchange factor (GEF) 1                                                                                          | Homo sapiens |
| 54069     | chromosome 21 open reading frame 45                                                                                                     | Homo sapiens |
| 6657      | SRY (sex determining region Y)-box 2                                                                                                    | Homo sapiens |
| 2000      | E74-like factor 4 (ets domain transcription factor)                                                                                     | Homo sapiens |
| 4779      | nuclear factor (erythroid-derived 2)-like 1                                                                                             | Homo sapiens |
| 10084     | polyglutamine binding protein 1                                                                                                         | Homo sapiens |
| 57409     | MIF4G domain containing                                                                                                                 | Homo sapiens |
| 4097      | v-maf musculoaponeurotic fibrosarcoma oncogene homolog G (avian)                                                                        | Homo sapiens |
| 10627     | myosin, light chain 12A, regulatory, non-sarcomeric                                                                                     | Homo sapiens |
| 4848      | CCR4-NOT transcription complex, subunit 2                                                                                               | Homo sapiens |
| 22803     | 5'-3' exoribonuclease 2                                                                                                                 | Homo sapiens |
| 4580      | metaxin 1                                                                                                                               | Homo sapiens |
| 55207     | ADP-ribosylation factor-like 8B                                                                                                         | Homo sapiens |
| 6165      | ribosomal protein L35a                                                                                                                  | Homo sapiens |
| 728723    | hypothetical LOC728723                                                                                                                  | Homo sapiens |
| 146956    | essential meiotic endonuclease 1 homolog 1 (S. pombe)                                                                                   | Homo sapiens |
| 55275     | vacuolar protein sorting 53 homolog (S. cerevisiae)                                                                                     | Homo sapiens |
| 219402    | mitochondrial translational initiation factor 3                                                                                         | Homo sapiens |
| 26054     | SUMO1/sentrin specific peptidase 6                                                                                                      | Homo sapiens |
| 51573     | glycerophosphodiester phosphodiesterase 1                                                                                               | Homo sapiens |
| 57213     | chromosome 13 open reading frame 1                                                                                                      | Homo sapiens |
| 55754     | transmembrane protein 30A                                                                                                               | Homo sapiens |
| 11103     | KRR1, small subunit (SSU) processome component, homolog (yeast)                                                                         | Homo sapiens |
| 60559     | signal peptidase complex subunit 3 homolog (S. cerevisiae)                                                                              | Homo sapiens |
| 23112     | trinucleotide repeat containing 6B                                                                                                      | Homo sapiens |
| 51650     | mitochondrial ribosomal protein S33                                                                                                     | Homo sapiens |
| 5869      | RAB5B, member RAS oncogene family                                                                                                       | Homo sapiens |
| 9512      | peptidase (mitochondrial processing) beta                                                                                               | Homo sapiens |
| 143279    | HECT domain containing 2                                                                                                                | Homo sapiens |
| 79568     | chromosome 2 open reading frame 47                                                                                                      | Homo sapiens |
| 3105      | major histocompatibility complex, class I, A                                                                                            | Homo sapiens |
| 375743    | protein prenyltransferase alpha subunit repeat containing 1                                                                             | Homo sapiens |
| 5567      | protein kinase, cAMP-dependent, catalytic, beta                                                                                         | Homo sapiens |
| 79971     | G protein-coupled receptor 177                                                                                                          | Homo sapiens |
| 55629     | proline-rich nuclear receptor coactivator 2; similar to hCG1728885                                                                      | Homo sapiens |
| 2237      | flap structure-specific endonuclease 1                                                                                                  | Homo sapiens |
| 4677      | asparaginyl-tRNA synthetase                                                                                                             | Homo sapiens |
| 6093      | similar to Rho-associated, coiled-coil containing protein kinase 1; Rho-associated, coiled-coil containing protein kinase 1             | Homo sapiens |
| 10950     | BTG family, member 3                                                                                                                    | Homo sapiens |
| 80213     | TM2 domain containing 3                                                                                                                 | Homo sapiens |
| 5494      | protein phosphatase 1A (formerly 2C), magnesium-dependent, alpha isoform                                                                | Homo sapiens |
| 1789      | DNA (cytosine-5)-methyltransferase 3 beta                                                                                               | Homo sapiens |
| 6203      | ribosomal protein S9; ribosomal protein S9 pseudogene 4                                                                                 | Homo sapiens |
| 54439     | RNA binding motif protein 27                                                                                                            | Homo sapiens |
| 10445     | microspherule protein 1                                                                                                                 | Homo sapiens |
| 5813      | purine-rich element binding protein A                                                                                                   | Homo sapiens |
| 84717     | hepatoma-derived growth factor-related protein 2                                                                                        | Homo sapiens |
| 3845      | v-Ki-ras2 Kirsten rat sarcoma viral oncogene homolog                                                                                    | Homo sapiens |
| 26608     | transducin (beta)-like 2                                                                                                                | Homo sapiens |
| 100131827 | zinc finger protein 717                                                                                                                 | Homo sapiens |
| 10430     | transmembrane protein 147                                                                                                               | Homo sapiens |
| 127687    | chromosome 1 open reading frame 122                                                                                                     | Homo sapiens |
| 51075     | thioredoxin-related transmembrane protein 2                                                                                             | Homo sapiens |
| 84108     | polycomb group ring finger 6                                                                                                            | Homo sapiens |
| 4763      | neurofibromin 1                                                                                                                         | Homo sapiens |
| 7341      | SMT3 suppressor of mif two 3 homolog 1 (S. cerevisiae); SUMO1 pseudogene 3                                                              | Homo sapiens |
| 5608      | mitogen-activated protein kinase kinase 6                                                                                               | Homo sapiens |
| 10953     | translocase of outer mitochondrial membrane 34                                                                                          | Homo sapiens |
| 27166     | PRELI domain containing 1; similar to Px19-like protein (25 kDa protein of relevant evolutionary and lymphoid interest) (PRELI)         | Homo sapiens |
| 81875     | interferon stimulated exonuclease gene 20kDa-like 2                                                                                     | Homo sapiens |
| 56941     | chromosome 3 open reading frame 37                                                                                                      | Homo sapiens |
| 9689      | basic leucine zipper and W2 domains 1 pseudogene 1; basic leucine zipper and W2 domains 1 like 1; basic leucine zipper and W2 domains 1 | Homo sapiens |
| 3775      | potassium channel, subfamily K, member 1                                                                                                | Homo sapiens |
| 26017     | family with sequence similarity 32, member A                                                                                            | Homo sapiens |
| 3227      | homeobox C11                                                                                                                            | Homo sapiens |
| 55084     | sine oculis binding protein homolog (Drosophila)                                                                                        | Homo sapiens |
| 54480     | chondroitin sulfate glucuronyltransferase                                                                                               | Homo sapiens |
| 401068    | hypothetical LOC401068                                                                                                                  | Homo sapiens |
| 2202      | EGF-containing fibulin-like extracellular matrix protein 1                                                                              | Homo sapiens |
| 8812      | cyclin K                                                                                                                                | Homo sapiens |
| 8615      | USO1 homolog, vesicle docking protein (yeast)                                                                                           | Homo sapiens |
| 93643     | tight junction associated protein 1 (peripheral)                                                                                        | Homo sapiens |

|           |                                                                                                                                             |              |
|-----------|---------------------------------------------------------------------------------------------------------------------------------------------|--------------|
| 728833    | family with sequence similarity 72, member D; family with sequence similarity 72, member A                                                  | Homo sapiens |
| 729533    | family with sequence similarity 72, member D; family with sequence similarity 72, member A                                                  | Homo sapiens |
| 81577     | glucose-fructose oxidoreductase domain containing 2                                                                                         | Homo sapiens |
| 10856     | RuvB-like 2 (E. coli)                                                                                                                       | Homo sapiens |
| 8509      | N-deacetylase/N-sulfotransferase (heparan glucosaminyl) 2                                                                                   | Homo sapiens |
| 115560    | zinc finger protein 501                                                                                                                     | Homo sapiens |
| 50813     | COP9 constitutive photomorphogenic homolog subunit 7A (Arabidopsis)                                                                         | Homo sapiens |
| 65109     | UPF3 regulator of nonsense transcripts homolog B (yeast)                                                                                    | Homo sapiens |
| 6625      | small nuclear ribonucleoprotein 70kDa (U1)                                                                                                  | Homo sapiens |
| 9338      | transcription elongation factor A (SII)-like 1                                                                                              | Homo sapiens |
| 90957     | DEAH (Asp-Glu-Ala-Asp/His) box polypeptide 57                                                                                               | Homo sapiens |
| 57666     | fibrosin-like 1                                                                                                                             | Homo sapiens |
| 310       | annexin A7                                                                                                                                  | Homo sapiens |
| 221908    | chromosome 7 open reading frame 47                                                                                                          | Homo sapiens |
| 80331     | DnaJ (Hsp40) homolog, subfamily C, member 5                                                                                                 | Homo sapiens |
| 11231     | SEC63 homolog (S. cerevisiae)                                                                                                               | Homo sapiens |
| 28969     | basic leucine zipper and W2 domains 2                                                                                                       | Homo sapiens |
| 51538     | zinc finger, CCHC domain containing 17                                                                                                      | Homo sapiens |
| 5573      | protein kinase, cAMP-dependent, regulatory, type I, alpha (tissue specific extinguisher 1)                                                  | Homo sapiens |
| 6888      | transaldolase 1                                                                                                                             | Homo sapiens |
| 9342      | synaptosomal-associated protein, 29kDa                                                                                                      | Homo sapiens |
| 389203    | hypothetical protein LOC389203                                                                                                              | Homo sapiens |
| 192669    | eukaryotic translation initiation factor 2C, 3                                                                                              | Homo sapiens |
| 729970    | similar to hCG2028352                                                                                                                       | Homo sapiens |
| 134359    | chromosome 5 open reading frame 37                                                                                                          | Homo sapiens |
| 1832      | desmoplakin                                                                                                                                 | Homo sapiens |
| 219699    | unc-5 homolog B (C. elegans)                                                                                                                | Homo sapiens |
| 8570      | KH-type splicing regulatory protein                                                                                                         | Homo sapiens |
| 84918     | low density lipoprotein receptor-related protein 11                                                                                         | Homo sapiens |
| 6774      | signal transducer and activator of transcription 3 (acute-phase response factor)                                                            | Homo sapiens |
| 6626      | small nuclear ribonucleoprotein polypeptide A                                                                                               | Homo sapiens |
| 4043      | low density lipoprotein receptor-related protein associated protein 1                                                                       | Homo sapiens |
| 5286      | phosphoinositide-3-kinase, class 2, alpha polypeptide                                                                                       | Homo sapiens |
| 81614     | non imprinted in Prader-Willi/Angelman syndrome 2                                                                                           | Homo sapiens |
| 1466      | cysteine and glycine-rich protein 2                                                                                                         | Homo sapiens |
| 55052     | similar to mitochondrial ribosomal protein L20; mitochondrial ribosomal protein L20                                                         | Homo sapiens |
| 10402     | ST3 beta-galactoside alpha-2,3-sialyltransferase 6                                                                                          | Homo sapiens |
| 9662      | centrosomal protein 135kDa                                                                                                                  | Homo sapiens |
| 84946     | similar to putative protein STRF7; LTV1 homolog (S. cerevisiae)                                                                             | Homo sapiens |
| 9837      | GINS complex subunit 1 (Psf1 homolog)                                                                                                       | Homo sapiens |
| 23107     | mitochondrial ribosomal protein S27                                                                                                         | Homo sapiens |
| 3983      | actin binding LIM protein 1                                                                                                                 | Homo sapiens |
| 9588      | peroxiredoxin 6                                                                                                                             | Homo sapiens |
| 8971      | H1 histone family, member X                                                                                                                 | Homo sapiens |
| 280636    | chromosome 11 open reading frame 31                                                                                                         | Homo sapiens |
| 332       | baculoviral IAP repeat-containing 5                                                                                                         | Homo sapiens |
| 10628     | thioredoxin interacting protein                                                                                                             | Homo sapiens |
| 64960     | mitochondrial ribosomal protein S15                                                                                                         | Homo sapiens |
| 84532     | acyl-CoA synthetase short-chain family member 1                                                                                             | Homo sapiens |
| 84233     | transmembrane protein 126A                                                                                                                  | Homo sapiens |
| 5934      | retinoblastoma-like 2 (p130)                                                                                                                | Homo sapiens |
| 80279     | CDK5 regulatory subunit associated protein 3                                                                                                | Homo sapiens |
| 80262     | chromosome 16 open reading frame 70                                                                                                         | Homo sapiens |
| 64708     | COP9 constitutive photomorphogenic homolog subunit 7B (Arabidopsis)                                                                         | Homo sapiens |
| 150381    | hypothetical LOC150381                                                                                                                      | Homo sapiens |
| 201931    | transmembrane protein 192                                                                                                                   | Homo sapiens |
| 23158     | TBC1 domain family, member 9 (with GRAM domain)                                                                                             | Homo sapiens |
| 23367     | La ribonucleoprotein domain family, member 1                                                                                                | Homo sapiens |
| 23258     | DENN/MADD domain containing 5A                                                                                                              | Homo sapiens |
| 10240     | mitochondrial ribosomal protein S31                                                                                                         | Homo sapiens |
| 84811     | BUD13 homolog (S. cerevisiae)                                                                                                               | Homo sapiens |
| 55254     | transmembrane protein 39A                                                                                                                   | Homo sapiens |
| 11198     | suppressor of Ty 16 homolog (S. cerevisiae); suppressor of Ty 16 homolog (S. cerevisiae)<br>pseudogene                                      | Homo sapiens |
| 56902     | partner of NOB1 homolog (S. cerevisiae)                                                                                                     | Homo sapiens |
| 10588     | 5,10-methenyltetrahydrofolate synthetase (5-formyltetrahydrofolate cyclo-ligase)                                                            | Homo sapiens |
| 54915     | YTH domain family, member 1                                                                                                                 | Homo sapiens |
| 7204      | triple functional domain (PTPRF interacting)                                                                                                | Homo sapiens |
| 2317      | filamin B, beta (actin binding protein 278)                                                                                                 | Homo sapiens |
| 79960     | PHD finger protein 17                                                                                                                       | Homo sapiens |
| 148413    | hypothetical LOC148413                                                                                                                      | Homo sapiens |
| 10802     | SEC24 family, member A (S. cerevisiae)                                                                                                      | Homo sapiens |
| 100133121 | family with sequence similarity 27, member C; family with sequence similarity 27, member A;<br>family with sequence similarity 27, member B | Homo sapiens |

|           |                                                                                                                                                        |              |
|-----------|--------------------------------------------------------------------------------------------------------------------------------------------------------|--------------|
| 548321    | family with sequence similarity 27, member C; family with sequence similarity 27, member A;                                                            | Homo sapiens |
|           | family with sequence similarity 27, member B                                                                                                           |              |
| 100132948 | family with sequence similarity 27, member C; family with sequence similarity 27, member A;                                                            | Homo sapiens |
|           | family with sequence similarity 27, member B                                                                                                           |              |
| 493856    | CDGSH iron sulfur domain 2                                                                                                                             | Homo sapiens |
| 26523     | eukaryotic translation initiation factor 2C, 1                                                                                                         | Homo sapiens |
| 23164     | myosin phosphatase Rho interacting protein; similar to Myosin phosphatase Rho-interacting protein (Rho-interacting protein 3) (M-RIP) (RIP3) (p116Rip) | Homo sapiens |
| 7357      | UDP-glucose ceramide glucosyltransferase                                                                                                               | Homo sapiens |
| 5093      | poly(rC) binding protein 1                                                                                                                             | Homo sapiens |
| 113457    | tubulin, alpha 3d; tubulin, alpha 3c                                                                                                                   | Homo sapiens |
| 10220     | growth differentiation factor 11                                                                                                                       | Homo sapiens |
| 51537     | mitochondrial protein 18 kDa                                                                                                                           | Homo sapiens |
| 92255     | LMBR1 domain containing 2                                                                                                                              | Homo sapiens |
| 7323      | ubiquitin-conjugating enzyme E2D 3 (UBC4/5 homolog, yeast); ubiquitin-conjugating enzyme E2D 3 pseudogene                                              | Homo sapiens |
| 10124     | ADP-ribosylation factor-like 4A                                                                                                                        | Homo sapiens |
| 3308      | heat shock 70kDa protein 4                                                                                                                             | Homo sapiens |
| 4538      | NADH-ubiquinone oxidoreductase chain 4L; NADH-ubiquinone oxidoreductase chain 4                                                                        | Homo sapiens |
| 23060     | zinc finger protein 609                                                                                                                                | Homo sapiens |
| 84886     | chromosome 1 open reading frame 198                                                                                                                    | Homo sapiens |
| 10289     | eukaryotic translation initiation factor 1B                                                                                                            | Homo sapiens |
| 7975      | v-maf musculoaponeurotic fibrosarcoma oncogene homolog K (avian)                                                                                       | Homo sapiens |
| 388610    | TMF1-regulated nuclear protein 1                                                                                                                       | Homo sapiens |
| 63979     | fidgetin-like 1                                                                                                                                        | Homo sapiens |
| 655       | bone morphogenetic protein 7                                                                                                                           | Homo sapiens |
| 55788     | LMBR1 domain containing 1                                                                                                                              | Homo sapiens |
| 197370    | non-SMC element 1 homolog (S. cerevisiae)                                                                                                              | Homo sapiens |
| 79624     | chromosome 6 open reading frame 211                                                                                                                    | Homo sapiens |
| 84988     | protein phosphatase 1, regulatory (inhibitor) subunit 16A                                                                                              | Homo sapiens |
| 857       | caveolin 1, caveolae protein, 22kDa                                                                                                                    | Homo sapiens |
| 25953     | paroxysmal nonkinesigenic dyskinesia                                                                                                                   | Homo sapiens |
| 64116     | solute carrier family 39 (zinc transporter), member 8                                                                                                  | Homo sapiens |
| 84231     | TNF receptor-associated factor 7                                                                                                                       | Homo sapiens |
| 145173    | beta 1,3-galactosyltransferase-like                                                                                                                    | Homo sapiens |
| 573       | BCL2-associated athanogene                                                                                                                             | Homo sapiens |
| 4123      | mannosidase, alpha, class 2C, member 1                                                                                                                 | Homo sapiens |
| 9559      | vacuolar protein sorting 26 homolog A (S. pombe)                                                                                                       | Homo sapiens |
| 27044     | staphylococcal nuclease and tudor domain containing 1                                                                                                  | Homo sapiens |
| 79607     | family with sequence similarity 118, member B                                                                                                          | Homo sapiens |
| 1615      | aspartyl-tRNA synthetase                                                                                                                               | Homo sapiens |
| 219854    | transmembrane protein 218                                                                                                                              | Homo sapiens |
| 5713      | proteasome (prosome, macropain) 26S subunit, non-ATPase, 7                                                                                             | Homo sapiens |
| 51379     | cytokine receptor-like factor 3                                                                                                                        | Homo sapiens |
| 440145    | chromosome 13 open reading frame 37                                                                                                                    | Homo sapiens |
| 80131     | leucine rich repeat containing 8 family, member E                                                                                                      | Homo sapiens |
| 5634      | phosphoribosyl pyrophosphate synthetase 2                                                                                                              | Homo sapiens |
| 55312     | riboflavin kinase                                                                                                                                      | Homo sapiens |
| 9201      | doublecortin-like kinase 1                                                                                                                             | Homo sapiens |
| 3837      | karyopherin (importin) beta 1                                                                                                                          | Homo sapiens |
| 84334     | chromosome 14 open reading frame 153                                                                                                                   | Homo sapiens |
| 11142     | protein kinase (cAMP-dependent, catalytic) inhibitor gamma                                                                                             | Homo sapiens |
| 130074    | family with sequence similarity 168, member B                                                                                                          | Homo sapiens |
| 23536     | adenosine deaminase, tRNA-specific 1                                                                                                                   | Homo sapiens |
| 57630     | SH3 domain containing ring finger 1                                                                                                                    | Homo sapiens |
| 8721      | endothelial differentiation-related factor 1                                                                                                           | Homo sapiens |
| 730092    | RRN3 RNA polymerase I transcription factor homolog (S. cerevisiae) pseudogene                                                                          | Homo sapiens |
| 2295      | forkhead box F2                                                                                                                                        | Homo sapiens |
| 6535      | solute carrier family 6 (neurotransmitter transporter, creatine), member 8                                                                             | Homo sapiens |
| 7818      | death associated protein 3                                                                                                                             | Homo sapiens |
| 7298      | thymidylate synthetase                                                                                                                                 | Homo sapiens |
| 51142     | coiled-coil-helix-coiled-coil-helix domain containing 2; similar to coiled-coil-helix-coiled-coil-helix domain containing 2                            | Homo sapiens |
| 10979     | fermitin family homolog 2 (Drosophila)                                                                                                                 | Homo sapiens |
| 2872      | MAP kinase interacting serine/threonine kinase 2                                                                                                       | Homo sapiens |
| 9688      | nucleoporin 93kDa                                                                                                                                      | Homo sapiens |
| 282996    | RNA binding motif protein 20                                                                                                                           | Homo sapiens |
| 165918    | ring finger protein 168                                                                                                                                | Homo sapiens |
| 80777     | cytochrome b5 type B (outer mitochondrial membrane)                                                                                                    | Homo sapiens |
| 116225    | zinc finger, MYND-type containing 19                                                                                                                   | Homo sapiens |
| 2395      | frataxin                                                                                                                                               | Homo sapiens |
| 28956     | roadblock domain containing 3                                                                                                                          | Homo sapiens |
| 114789    | solute carrier family 25 (mitochondrial carrier; phosphate carrier), member 25                                                                         | Homo sapiens |
| 79666     | pleckstrin homology domain containing, family F (with FYVE domain) member 2                                                                            | Homo sapiens |
| 51002     | TP53RK binding protein                                                                                                                                 | Homo sapiens |
| 29920     | pyrroline-5-carboxylate reductase family, member 2                                                                                                     | Homo sapiens |
| 9045      | ribosomal protein L14                                                                                                                                  | Homo sapiens |



|        |                                                                                        |              |
|--------|----------------------------------------------------------------------------------------|--------------|
| 9563   | hexose-6-phosphate dehydrogenase (glucose 1-dehydrogenase)                             | Homo sapiens |
| 23517  | superkiller viralicidic activity 2-like 2 (S. cerevisiae)                              | Homo sapiens |
| 4212   | Meis homeobox 2                                                                        | Homo sapiens |
| 51302  | cytochrome P450, family 39, subfamily A, polypeptide 1                                 | Homo sapiens |
| 55802  | DCP1 decapping enzyme homolog A (S. cerevisiae)                                        | Homo sapiens |
| 5378   | PMS1 postmeiotic segregation increased 1 (S. cerevisiae)                               | Homo sapiens |
| 54539  | NADH dehydrogenase (ubiquinone) 1 beta subcomplex, 11, 17.3kDa                         | Homo sapiens |
| 84869  | carbonyl reductase 4                                                                   | Homo sapiens |
| 92002  | family with sequence similarity 58, member A; hypothetical gene supported by NM_152274 | Homo sapiens |
| 4780   | nuclear factor (erythroid-derived 2)-like 2                                            | Homo sapiens |
| 10519  | calcium and integrin binding 1 (calmyrin)                                              | Homo sapiens |
| 93986  | forkhead box P2                                                                        | Homo sapiens |
| 51534  | Vps20-associated 1 homolog (S. cerevisiae)                                             | Homo sapiens |
| 51020  | HD domain containing 2                                                                 | Homo sapiens |
| 79677  | structural maintenance of chromosomes 6                                                | Homo sapiens |
| 5663   | presenilin 1                                                                           | Homo sapiens |
| 3098   | hexokinase 1                                                                           | Homo sapiens |
| 55033  | FK506 binding protein 14, 22 kDa                                                       | Homo sapiens |
| 203069 | R3H domain and coiled-coil containing 1                                                | Homo sapiens |
| 57545  | coiled-coil and C2 domain containing 2A                                                | Homo sapiens |
| 57645  | pogo transposable element with KRAB domain                                             | Homo sapiens |
| 2281   | FK506 binding protein 1B, 12.6 kDa                                                     | Homo sapiens |
| 5826   | ATP-binding cassette, sub-family D (ALD), member 4                                     | Homo sapiens |
| 2288   | FK506 binding protein 4, 59kDa                                                         | Homo sapiens |
| 10241  | calcium binding and coiled-coil domain 2                                               | Homo sapiens |
| 5586   | protein kinase N2                                                                      | Homo sapiens |
| 4194   | Mdm4 p53 binding protein homolog (mouse)                                               | Homo sapiens |
| 56852  | RAD18 homolog (S. cerevisiae)                                                          | Homo sapiens |
| 8939   | far upstream element (FUSE) binding protein 3                                          | Homo sapiens |
| 23275  | protein O-fucosyltransferase 2                                                         | Homo sapiens |
| 24140  | FtsJ homolog 1 (E. coli)                                                               | Homo sapiens |
| 56252  | YLP motif containing 1                                                                 | Homo sapiens |
| 253264 | hypothetical protein LOC253264                                                         | Homo sapiens |
| 8673   | vesicle-associated membrane protein 8 (endobrevin)                                     | Homo sapiens |
| 4802   | nuclear transcription factor Y, gamma                                                  | Homo sapiens |
| 6899   | T-box 1                                                                                | Homo sapiens |
| 9383   | XIST antisense RNA (non-protein coding)                                                | Homo sapiens |
| 55023  | pleckstrin homology domain interacting protein                                         | Homo sapiens |
| 65260  | chromosome 1 open reading frame 163                                                    | Homo sapiens |
| 8450   | cullin 4B                                                                              | Homo sapiens |
| 404636 | family with sequence similarity 45, member A                                           | Homo sapiens |
| 23063  | wings apart-like homolog (Drosophila)                                                  | Homo sapiens |
| 339287 | male-specific lethal 1 homolog (Drosophila)                                            | Homo sapiens |
| 84874  | zinc finger protein 514                                                                | Homo sapiens |
| 51478  | hydroxysteroid (17-beta) dehydrogenase 7                                               | Homo sapiens |
| 1340   | cytochrome c oxidase subunit Vib polypeptide 1 (ubiquitous)                            | Homo sapiens |
| 441263 | postmeiotic segregation increased 2-like 11 pseudogene                                 | Homo sapiens |
| 9889   | zinc finger, BED-type containing 4                                                     | Homo sapiens |
| 91300  | chromosome 19 open reading frame 22                                                    | Homo sapiens |
| 23163  | golgi associated, gamma adaptin ear containing, ARF binding protein 3                  | Homo sapiens |
| 1075   | cathepsin C                                                                            | Homo sapiens |
| 619208 | chromosome 6 open reading frame 225                                                    | Homo sapiens |
| 10363  | high-mobility group 20A                                                                | Homo sapiens |
| 143686 | sestrin 3                                                                              | Homo sapiens |
| 642533 | hypothetical LOC642533                                                                 | Homo sapiens |
| 9406   | zinc finger, RAN-binding domain containing 2                                           | Homo sapiens |
| 128077 | Lix1 homolog (mouse)-like                                                              | Homo sapiens |
| 23350  | U2-associated SR140 protein                                                            | Homo sapiens |
| 254065 | bromodomain and WD repeat domain containing 3                                          | Homo sapiens |
| 10198  | M-phase phosphoprotein 9                                                               | Homo sapiens |
| 84277  | DnaJ (Hsp40) homolog, subfamily C, member 30                                           | Homo sapiens |
| 11021  | similar to hCG1778032; RAB35, member RAS oncogene family                               | Homo sapiens |
| 163    | adaptor-related protein complex 2, beta 1 subunit                                      | Homo sapiens |
| 84062  | dystrobrevin binding protein 1                                                         | Homo sapiens |
| 399818 | methyltransferase like 10                                                              | Homo sapiens |
| 144438 | hypothetical LOC144438                                                                 | Homo sapiens |
| 8800   | peroxisomal biogenesis factor 11 alpha                                                 | Homo sapiens |
| 6640   | syntrophin, alpha 1 (dystrophin-associated protein A1, 59kDa, acidic component)        | Homo sapiens |
| 958    | CD40 molecule, TNF receptor superfamily member 5                                       | Homo sapiens |
| 53343  | nudix (nucleoside diphosphate linked moiety X)-type motif 9                            | Homo sapiens |
| 5134   | programmed cell death 2                                                                | Homo sapiens |
| 25945  | poliovirus receptor-related 3                                                          | Homo sapiens |
| 11188  | nischarin                                                                              | Homo sapiens |
| 25962  | KIAA1429                                                                               | Homo sapiens |
| 51444  | ring finger protein 138                                                                | Homo sapiens |
| 64921  | CAS1 domain containing 1                                                               | Homo sapiens |
| 25942  | SIN3 homolog A, transcription regulator (yeast)                                        | Homo sapiens |

|        |                                                                                          |              |
|--------|------------------------------------------------------------------------------------------|--------------|
| 3725   | jun oncogene                                                                             | Homo sapiens |
| 6645   | syntrophin, beta 2 (dystrophin-associated protein A1, 59kDa, basic component 2)          | Homo sapiens |
| 51635  | dehydrogenase/reductase (SDR family) member 7                                            | Homo sapiens |
| 1514   | cathepsin L1                                                                             | Homo sapiens |
| 5706   | proteasome (prosome, macropain) 26S subunit, ATPase, 6                                   | Homo sapiens |
| 391    | ras homolog gene family, member G (rho G)                                                | Homo sapiens |
| 3209   | homeobox A13                                                                             | Homo sapiens |
| 144983 | heterogeneous nuclear ribonucleoprotein A1-like 2                                        | Homo sapiens |
| 10920  | COP9 constitutive photomorphogenic homolog subunit 8 (Arabidopsis)                       | Homo sapiens |
| 90843  | transcription elongation factor A (SII)-like 8                                           | Homo sapiens |
| 64645  | hippocampus abundant transcript 1                                                        | Homo sapiens |
| 359948 | interferon regulatory factor 2 binding protein 2                                         | Homo sapiens |
| 51619  | ubiquitin-conjugating enzyme E2D 4 (putative)                                            | Homo sapiens |
| 5189   | peroxisomal biogenesis factor 1                                                          | Homo sapiens |
| 84265  | polymerase (RNA) III (DNA directed) polypeptide G (32kD)-like                            | Homo sapiens |
| 5007   | oxysterol binding protein                                                                | Homo sapiens |
| 4356   | membrane protein, palmitoylated 3 (MAGUK p55 subfamily member 3)                         | Homo sapiens |
| 54534  | mitochondrial ribosomal protein L50                                                      | Homo sapiens |
| 2035   | erythrocyte membrane protein band 4.1 (elliptocytosis 1, RH-linked)                      | Homo sapiens |
| 6193   | ribosomal protein S5                                                                     | Homo sapiens |
| 9146   | hepatocyte growth factor-regulated tyrosine kinase substrate                             | Homo sapiens |
| 6827   | suppressor of Ty 4 homolog 1 (S. cerevisiae)                                             | Homo sapiens |
| 23047  | PDS5, regulator of cohesion maintenance, homolog B (S. cerevisiae)                       | Homo sapiens |
| 8091   | high mobility group AT-hook 2                                                            | Homo sapiens |
| 5089   | pre-B-cell leukemia homeobox 2                                                           | Homo sapiens |
| 10970  | cytoskeleton-associated protein 4                                                        | Homo sapiens |
| 59307  | single immunoglobulin and toll-interleukin 1 receptor (TIR) domain                       | Homo sapiens |
| 401548 | sorting nexin family member 30                                                           | Homo sapiens |
| 3838   | karyopherin alpha 2 (RAG cohort 1, importin alpha 1); karyopherin alpha-2 subunit like   | Homo sapiens |
| 29956  | LAG1 homolog, ceramide synthase 2                                                        | Homo sapiens |
| 27067  | staufen, RNA binding protein, homolog 2 (Drosophila)                                     | Homo sapiens |
| 79723  | suppressor of variegation 3-9 homolog 2 (Drosophila)                                     | Homo sapiens |
| 137886 | UBX domain protein 2B                                                                    | Homo sapiens |
| 9529   | BCL2-associated athanogene 5                                                             | Homo sapiens |
| 55449  | chromosome 14 open reading frame 167                                                     | Homo sapiens |
| 23413  | frequenin homolog (Drosophila)                                                           | Homo sapiens |
| 28955  | dexamethasone-induced transcript                                                         | Homo sapiens |
| 54407  | solute carrier family 38, member 2                                                       | Homo sapiens |
| 3275   | protein arginine methyltransferase 2                                                     | Homo sapiens |
| 55677  | IWS1 homolog (S. cerevisiae)                                                             | Homo sapiens |
| 79659  | dynein, cytoplasmic 2, heavy chain 1                                                     | Homo sapiens |
| 928    | CD9 molecule                                                                             | Homo sapiens |
| 51729  | WW domain binding protein 11                                                             | Homo sapiens |
| 5529   | protein phosphatase 2, regulatory subunit B', epsilon isoform                            | Homo sapiens |
| 54841  | basic, immunoglobulin-like variable motif containing                                     | Homo sapiens |
| 26012  | nasal embryonic LHRH factor                                                              | Homo sapiens |
| 7416   | voltage-dependent anion channel 1; similar to voltage-dependent anion channel 1          | Homo sapiens |
| 4137   | microtubule-associated protein tau                                                       | Homo sapiens |
| 22818  | coatmer protein complex, subunit zeta 1                                                  | Homo sapiens |
| 8878   | sequestosome 1                                                                           | Homo sapiens |
| 85365  | asparagine-linked glycosylation 2, alpha-1,3-mannosyltransferase homolog (S. cerevisiae) | Homo sapiens |
| 466    | activating transcription factor 1                                                        | Homo sapiens |
| 23731  | chromosome 9 open reading frame 5                                                        | Homo sapiens |
| 81565  | nudE nuclear distribution gene E homolog (A. nidulans)-like 1                            | Homo sapiens |
| 10480  | eukaryotic translation initiation factor 3, subunit M                                    | Homo sapiens |
| 54908  | coiled-coil domain containing 99                                                         | Homo sapiens |
| 1021   | cyclin-dependent kinase 6                                                                | Homo sapiens |
| 84224  | neuroblastoma breakpoint family, member 3                                                | Homo sapiens |
| 93380  | membrane magnesium transporter 1                                                         | Homo sapiens |
| 4602   | v-myb myeloblastosis viral oncogene homolog (avian)                                      | Homo sapiens |
| 7324   | ubiquitin-conjugating enzyme E2E 1 (UBC4/5 homolog, yeast)                               | Homo sapiens |
| 203259 | chromosome 9 open reading frame 25                                                       | Homo sapiens |
| 79882  | zinc finger CCCH-type containing 14                                                      | Homo sapiens |
| 23116  | family with sequence similarity 179, member B                                            | Homo sapiens |
| 400793 | chromosome 1 open reading frame 226                                                      | Homo sapiens |
| 64788  | lipase maturation factor 1                                                               | Homo sapiens |
| 222553 | solute carrier family 35, member F1                                                      | Homo sapiens |
| 7077   | TIMP metalloproteinase inhibitor 2                                                       | Homo sapiens |
| 84733  | chromobox homolog 2 (Pc class homolog, Drosophila)                                       | Homo sapiens |
| 9061   | 3'-phosphoadenosine 5'-phosphosulfate synthase 1                                         | Homo sapiens |
| 23023  | transmembrane and coiled-coil domain family 1                                            | Homo sapiens |
| 27032  | ATPase, Ca++ transporting, type 2C, member 1                                             | Homo sapiens |
| 56984  | proteasome (prosome, macropain) assembly chaperone 2                                     | Homo sapiens |
| 64083  | golgi phosphoprotein 3 (coat-protein)                                                    | Homo sapiens |
| 9133   | cyclin B2                                                                                | Homo sapiens |
| 23269  | MAX gene associated                                                                      | Homo sapiens |
| 388272 | chromosome 16 open reading frame 87                                                      | Homo sapiens |

|        |                                                                                           |              |
|--------|-------------------------------------------------------------------------------------------|--------------|
| 5860   | quinoid dihydropteridine reductase                                                        | Homo sapiens |
| 143458 | low density lipoprotein receptor class A domain containing 3                              | Homo sapiens |
| 1729   | diaphanous homolog 1 (Drosophila)                                                         | Homo sapiens |
| 5538   | palmitoyl-protein thioesterase 1                                                          | Homo sapiens |
| 4646   | myosin VI                                                                                 | Homo sapiens |
| 5000   | origin recognition complex, subunit 4-like (yeast)                                        | Homo sapiens |
| 22853  | lemur tyrosine kinase 2                                                                   | Homo sapiens |
| 7703   | polycomb group ring finger 2                                                              | Homo sapiens |
| 51     | acyl-Coenzyme A oxidase 1, palmitoyl                                                      | Homo sapiens |
| 580    | BRCA1 associated RING domain 1                                                            | Homo sapiens |
| 400684 | hypothetical gene supported by BC000922                                                   | Homo sapiens |
| 84163  | GTF2I repeat domain containing 2                                                          | Homo sapiens |
| 11091  | WD repeat domain 5                                                                        | Homo sapiens |
| 11083  | death inducer-obliterator 1                                                               | Homo sapiens |
| 3703   | STT3, subunit of the oligosaccharyltransferase complex, homolog A (S. cerevisiae)         | Homo sapiens |
| 202018 | transmembrane anterior posterior transformation 1                                         | Homo sapiens |
| 64682  | anaphase promoting complex subunit 1; similar to anaphase promoting complex subunit 1     | Homo sapiens |
| 201725 | hypothetical LOC100129478; chromosome 4 open reading frame 46                             | Homo sapiens |
| 26249  | kelch-like 3 (Drosophila)                                                                 | Homo sapiens |
| 54949  | chromosome 11 open reading frame 79                                                       | Homo sapiens |
| 8935   | src kinase associated phosphoprotein 2                                                    | Homo sapiens |
| 4638   | myosin light chain kinase                                                                 | Homo sapiens |
| 146198 | zinc finger protein 90 homolog (mouse)                                                    | Homo sapiens |
| 1756   | dystrophin                                                                                | Homo sapiens |
| 55167  | male-specific lethal 2 homolog (Drosophila)                                               | Homo sapiens |
| 5445   | paraoxonase 2                                                                             | Homo sapiens |
| 81847  | ring finger protein 146                                                                   | Homo sapiens |
| 8841   | histone deacetylase 3                                                                     | Homo sapiens |
| 7167   | TPI1 pseudogene; triosephosphate isomerase 1                                              | Homo sapiens |
| 23016  | exosome component 7                                                                       | Homo sapiens |
| 51629  | solute carrier family 25, member 39                                                       | Homo sapiens |
| 7286   | tuftelin 1                                                                                | Homo sapiens |
| 58986  | transmembrane protein 8A                                                                  | Homo sapiens |
| 2768   | guanine nucleotide binding protein (G protein) alpha 12                                   | Homo sapiens |
| 22978  | 5'-nucleotidase, cytosolic II                                                             | Homo sapiens |
| 523    | ATPase, H <sup>+</sup> transporting, lysosomal 70kDa, VI subunit A                        | Homo sapiens |
| 1936   | eukaryotic translation elongation factor 1 delta (guanine nucleotide exchange protein)    | Homo sapiens |
| 63924  | cell death-inducing DFFA-like effector c                                                  | Homo sapiens |
| 3714   | jagged 2                                                                                  | Homo sapiens |
| 84083  | zinc finger, RAN-binding domain containing 3                                              | Homo sapiens |
| 51116  | mitochondrial ribosomal protein S2                                                        | Homo sapiens |
| 85464  | slingshot homolog 2 (Drosophila)                                                          | Homo sapiens |
| 112483 | spermidine/spermine N1-acetyltransferase family member 2                                  | Homo sapiens |
| 9500   | melanoma antigen family D, 1                                                              | Homo sapiens |
| 84250  | ankyrin repeat domain 32                                                                  | Homo sapiens |
| 5037   | phosphatidylethanolamine binding protein 1                                                | Homo sapiens |
| 153830 | ring finger protein 145                                                                   | Homo sapiens |
| 55827  | IQ motif and WD repeats 1                                                                 | Homo sapiens |
| 23228  | phospholipase C-like 2                                                                    | Homo sapiens |
| 790955 | chromosome 11 open reading frame 83                                                       | Homo sapiens |
| 645722 | hypothetical LOC645722                                                                    | Homo sapiens |
| 51241  | COX16 cytochrome c oxidase assembly homolog (S. cerevisiae)                               | Homo sapiens |
| 23294  | ankyrin repeat and sterile alpha motif domain containing 1A                               | Homo sapiens |
| 10491  | cartilage associated protein                                                              | Homo sapiens |
| 285704 | RGM domain family, member B                                                               | Homo sapiens |
| 55728  | NEDD4 binding protein 2                                                                   | Homo sapiens |
| 5511   | protein phosphatase 1, regulatory (inhibitor) subunit 8                                   | Homo sapiens |
| 2647   | biogenesis of lysosomal organelles complex-1, subunit 1                                   | Homo sapiens |
| 4170   | myeloid cell leukemia sequence 1 (BCL2-related)                                           | Homo sapiens |
| 25911  | deleted in a mouse model of primary ciliary dyskinesia                                    | Homo sapiens |
| 57136  | chromosome 20 open reading frame 3                                                        | Homo sapiens |
| 1639   | dynactin 1 (p150, glued homolog, Drosophila)                                              | Homo sapiens |
| 90637  | zinc finger, AN1-type domain 2A                                                           | Homo sapiens |
| 139221 | melanoma associated antigen (mutated) 1-like 1                                            | Homo sapiens |
| 10795  | zinc finger protein 268                                                                   | Homo sapiens |
| 9531   | BCL2-associated athanogene 3                                                              | Homo sapiens |
| 10946  | splicing factor 3a, subunit 3, 60kDa                                                      | Homo sapiens |
| 80139  | zinc finger protein 703                                                                   | Homo sapiens |
| 25805  | hypothetical LOC729590; BMP and activin membrane-bound inhibitor homolog (Xenopus laevis) | Homo sapiens |
| 92935  | methionyl-tRNA synthetase 2, mitochondrial                                                | Homo sapiens |
| 79646  | pantothenate kinase 3                                                                     | Homo sapiens |
| 2130   | similar to Ewing sarcoma breakpoint region 1; Ewing sarcoma breakpoint region 1           | Homo sapiens |
| 167227 | DCP2 decapping enzyme homolog (S. cerevisiae)                                             | Homo sapiens |
| 29842  | transcription factor CP2-like 1                                                           | Homo sapiens |
| 135228 | CD109 molecule                                                                            | Homo sapiens |
| 3163   | heme oxygenase (decycling) 2                                                              | Homo sapiens |

|           |                                                                                              |              |
|-----------|----------------------------------------------------------------------------------------------|--------------|
| 1069      | centrin, EF-hand protein, 2                                                                  | Homo sapiens |
| 84186     | zinc finger, CCHC domain containing 7                                                        | Homo sapiens |
| 345778    | metaxin 3                                                                                    | Homo sapiens |
| 94032     | calcium/calmodulin-dependent protein kinase II inhibitor 2                                   | Homo sapiens |
| 8661      | eukaryotic translation initiation factor 3, subunit A                                        | Homo sapiens |
| 54838     | chromosome 10 open reading frame 26                                                          | Homo sapiens |
| 643180    | chaperonin containing TC1P1, subunit 6A pseudogene                                           | Homo sapiens |
| 201254    | stimulated by retinoic acid 13 homolog (mouse)                                               | Homo sapiens |
| 84892     | chromosome 3 open reading frame 39                                                           | Homo sapiens |
| 23200     | ATPase, class VI, type 11B                                                                   | Homo sapiens |
| 4664      | NGFI-A binding protein 1 (EGR1 binding protein 1)                                            | Homo sapiens |
| 84301     | DDI1, DNA-damage inducible 1, homolog 2 (S. cerevisiae)                                      | Homo sapiens |
| 26227     | phosphoglycerate dehydrogenase                                                               | Homo sapiens |
| 5036      | proliferation-associated 2G4, 38kDa; proliferation-associated 2G4 pseudogene 4               | Homo sapiens |
| 5379      | postmeiotic segregation increased 2-like 1 pseudogene                                        | Homo sapiens |
| 8621      | cell division cycle 2-like 5 (cholinesterase-related cell division controller)               | Homo sapiens |
| 7259      | TSPY-like 1                                                                                  | Homo sapiens |
| 55228     | PNMA-like 1                                                                                  | Homo sapiens |
| 84451     | mixed lineage kinase 4                                                                       | Homo sapiens |
| 23352     | ubiquitin protein ligase E3 component n-recognin 4                                           | Homo sapiens |
| 7979      | split hand/foot malformation (ectrodactyly) type 1                                           | Homo sapiens |
| 653390    | RRN3 RNA polymerase I transcription factor homolog (S. cerevisiae) pseudogene                | Homo sapiens |
| 9894      | TEL2, telomere maintenance 2, homolog (S. cerevisiae)                                        | Homo sapiens |
| 121053    | chromosome 12 open reading frame 45                                                          | Homo sapiens |
| 6427      | splicing factor, arginine/serine-rich 2                                                      | Homo sapiens |
| 23118     | mitogen-activated protein kinase kinase 7 interacting protein 2                              | Homo sapiens |
| 388789    | hypothetical LOC388789                                                                       | Homo sapiens |
| 27351     | PPPDE peptidase domain containing 2                                                          | Homo sapiens |
| 6301      | seryl-tRNA synthetase                                                                        | Homo sapiens |
| 124491    | transmembrane protein 170A                                                                   | Homo sapiens |
| 54984     | PIN2-interacting protein 1                                                                   | Homo sapiens |
| 3400      | inhibitor of DNA binding 4, dominant negative helix-loop-helix protein                       | Homo sapiens |
| 2617      | glycyl-tRNA synthetase                                                                       | Homo sapiens |
| 100129482 | zinc finger protein 37B (pseudogene)                                                         | Homo sapiens |
| 255919    | transmembrane protein 188; similar to TMEM188 protein                                        | Homo sapiens |
| 2287      | FK506 binding protein 3, 25kDa                                                               | Homo sapiens |
| 151473    | solute carrier family 16, member 14 (monocarboxylic acid transporter 14)                     | Homo sapiens |
| 440465    | hypothetical LOC440465                                                                       | Homo sapiens |
| 4436      | mutS homolog 2, colon cancer, nonpolyposis type 1 (E. coli)                                  | Homo sapiens |
| 23155     | chloride channel CLIC-like 1                                                                 | Homo sapiens |
| 3796      | kinesin heavy chain member 2A                                                                | Homo sapiens |
| 10434     | lysophospholipase I                                                                          | Homo sapiens |
| 54940     | OCIA domain containing 1                                                                     | Homo sapiens |
| 7419      | voltage-dependent anion channel 3                                                            | Homo sapiens |
| 6801      | striatin, calmodulin binding protein                                                         | Homo sapiens |
| 64393     | zinc finger, matrin type 3                                                                   | Homo sapiens |
| 23333     | dpy-19-like 1 (C. elegans); similar to hCG1645499                                            | Homo sapiens |
| 9665      | KIAA0430                                                                                     | Homo sapiens |
| 51263     | mitochondrial ribosomal protein L30                                                          | Homo sapiens |
| 4145      | megakaryocyte-associated tyrosine kinase                                                     | Homo sapiens |
| 29985     | solute carrier family 39 (zinc transporter), member 3                                        | Homo sapiens |
| 139886    | spindlin family, member 4                                                                    | Homo sapiens |
| 154796    | angiomotin                                                                                   | Homo sapiens |
| 25972     | unc-50 homolog (C. elegans)                                                                  | Homo sapiens |
| 8531      | cold shock domain protein A; cold shock domain protein A pseudogene 1                        | Homo sapiens |
| 29057     | family with sequence similarity 156, member A; family with sequence similarity 156, member B | Homo sapiens |
| 727866    | family with sequence similarity 156, member A; family with sequence similarity 156, member B | Homo sapiens |
| 4641      | myosin IC                                                                                    | Homo sapiens |
| 55845     | chromosome 3 open reading frame 10                                                           | Homo sapiens |
| 80011     | NEFA-interacting nuclear protein NIP30                                                       | Homo sapiens |
| 7763      | similar to zinc finger, AN1-type domain 5; zinc finger, AN1-type domain 5                    | Homo sapiens |
| 60314     | chromosome 12 open reading frame 10                                                          | Homo sapiens |
| 285172    | family with sequence similarity 126, member B                                                | Homo sapiens |
| 259217    | heat shock 70kDa protein 12A                                                                 | Homo sapiens |
| 64376     | IKAROS family zinc finger 5 (Pegasus)                                                        | Homo sapiens |
| 54482     | coiled-coil domain containing 76                                                             | Homo sapiens |
| 27258     | LSM3 homolog, U6 small nuclear RNA associated (S. cerevisiae); similar to Lsm3 protein       | Homo sapiens |
| 10622     | polymerase (RNA) III (DNA directed) polypeptide G (32kD)                                     | Homo sapiens |
| 1362      | carboxypeptidase D                                                                           | Homo sapiens |
| 51188     | synovial sarcoma translocation gene on chromosome 18-like 2                                  | Homo sapiens |
| 153642    | arylsulfatase family, member K                                                               | Homo sapiens |
| 7743      | zinc finger protein 189                                                                      | Homo sapiens |
| 38        | acetyl-Coenzyme A acetyltransferase 1                                                        | Homo sapiens |
| 23583     | single-strand-selective monofunctional uracil-DNA glycosylase 1                              | Homo sapiens |
| 23516     | solute carrier family 39 (zinc transporter), member 14                                       | Homo sapiens |

|        |                                                                                       |              |
|--------|---------------------------------------------------------------------------------------|--------------|
| 9712   | USP6 N-terminal like                                                                  | Homo sapiens |
| 51780  | lysine (K)-specific demethylase 3B                                                    | Homo sapiens |
| 2098   | esterase D/formylglutathione hydrolase                                                | Homo sapiens |
| 11236  | ring finger protein 139                                                               | Homo sapiens |
| 8669   | eukaryotic translation initiation factor 3, subunit J                                 | Homo sapiens |
| 493753 | chromosome 2 open reading frame 64                                                    | Homo sapiens |
| 29074  | mitochondrial ribosomal protein L18                                                   | Homo sapiens |
| 8566   | pyridoxal (pyridoxine, vitamin B6) kinase                                             | Homo sapiens |
| 57504  | metastasis associated 1 family, member 3                                              | Homo sapiens |
| 7552   | zinc finger protein 711                                                               | Homo sapiens |
| 114327 | EF-hand domain (C-terminal) containing 1                                              | Homo sapiens |
| 83640  | family with sequence similarity 103, member A1                                        | Homo sapiens |
| 441478 | NOTCH-regulated ankyrin repeat protein                                                | Homo sapiens |
| 6839   | suppressor of variegation 3-9 homolog 1 (Drosophila)                                  | Homo sapiens |
| 79970  | zinc finger family member 767                                                         | Homo sapiens |
| 23332  | cytoplasmic linker associated protein 1                                               | Homo sapiens |
| 126282 | tumor necrosis factor, alpha-induced protein 8-like 1                                 | Homo sapiens |
| 5983   | replication factor C (activator 1) 3, 38kDa                                           | Homo sapiens |
| 6483   | ST3 beta-galactoside alpha-2,3-sialyltransferase 2                                    | Homo sapiens |
| 283337 | zinc finger protein 740                                                               | Homo sapiens |
| 645    | biliverdin reductase B (flavin reductase (NADPH))                                     | Homo sapiens |
| 4288   | antigen identified by monoclonal antibody Ki-67                                       | Homo sapiens |
| 403341 | zinc finger and BTB domain containing 34                                              | Homo sapiens |
| 5279   | phosphatidylinositol glycan anchor biosynthesis, class C                              | Homo sapiens |
| 1622   | diazepam binding inhibitor (GABA receptor modulator, acyl-Coenzyme A binding protein) | Homo sapiens |
| 83543  | allograft inflammatory factor 1-like                                                  | Homo sapiens |
| 23357  | angel homolog 1 (Drosophila)                                                          | Homo sapiens |
| 22890  | zinc finger and BTB domain containing 1                                               | Homo sapiens |
| 340544 | hypothetical protein LOC340544                                                        | Homo sapiens |
| 23160  | WD repeat domain 43                                                                   | Homo sapiens |
| 4925   | nucleobindin 2                                                                        | Homo sapiens |
| 6671   | Sp4 transcription factor                                                              | Homo sapiens |
| 481    | ATPase, Na <sup>+</sup> /K <sup>+</sup> transporting, beta 1 polypeptide              | Homo sapiens |
| 27068  | pyrophosphatase (inorganic) 2                                                         | Homo sapiens |
| 79004  | CUE domain containing 2                                                               | Homo sapiens |
| 22     | ATP-binding cassette, sub-family B (MDR/TAP), member 7                                | Homo sapiens |
| 57184  | chromosome 15 open reading frame 17                                                   | Homo sapiens |
| 22938  | SNW domain containing 1                                                               | Homo sapiens |
| 28976  | acyl-Coenzyme A dehydrogenase family, member 9                                        | Homo sapiens |
| 121536 | AE binding protein 2                                                                  | Homo sapiens |
| 22859  | latrophilin 1                                                                         | Homo sapiens |
| 219927 | mitochondrial ribosomal protein L21                                                   | Homo sapiens |
| 51550  | cyclin-dependent kinase 2-interacting protein                                         | Homo sapiens |
| 133383 | chromosome 5 open reading frame 35                                                    | Homo sapiens |
| 10954  | protein disulfide isomerase family A, member 5                                        | Homo sapiens |
| 7090   | transducin-like enhancer of split 3 (E(spl) homolog, Drosophila)                      | Homo sapiens |
| 441951 | chromosome 20 open reading frame 199                                                  | Homo sapiens |
| 2509   | ferritin, heavy polypeptide pseudogene 1                                              | Homo sapiens |
| 57820  | cyclin B1 interacting protein 1                                                       | Homo sapiens |
| 146923 | RUN domain containing 1                                                               | Homo sapiens |
| 84726  | HLA-B associated transcript 2-like                                                    | Homo sapiens |
| 103910 | myosin, light chain 12B, regulatory                                                   | Homo sapiens |
| 134637 | adenosine deaminase, tRNA-specific 2, TAD2 homolog (S. cerevisiae)                    | Homo sapiens |
| 9885   | oxysterol binding protein-like 2                                                      | Homo sapiens |
| 5738   | prostaglandin F2 receptor negative regulator                                          | Homo sapiens |
| 9604   | ring finger protein 14                                                                | Homo sapiens |
| 1528   | cytochrome b5 type A (microsomal)                                                     | Homo sapiens |
| 51507  | chromosome 20 open reading frame 43                                                   | Homo sapiens |
| 22907  | DEAH (Asp-Glu-Ala-His) box polypeptide 30                                             | Homo sapiens |
| 2181   | acyl-CoA synthetase long-chain family member 3                                        | Homo sapiens |
| 80025  | pantothenate kinase 2                                                                 | Homo sapiens |
| 8915   | B-cell CLL/lymphoma 10; hypothetical LOC646626                                        | Homo sapiens |
| 133686 | chromosome 5 open reading frame 33                                                    | Homo sapiens |
| 11342  | ring finger protein 13                                                                | Homo sapiens |
| 10063  | COX17 cytochrome c oxidase assembly homolog (S. cerevisiae)                           | Homo sapiens |
| 27013  | chromosome 2 open reading frame 24                                                    | Homo sapiens |
| 27065  | DNA segment on chromosome 4 (unique) 234 expressed sequence                           | Homo sapiens |
| 546    | alpha thalassemia/mental retardation syndrome X-linked (RAD54 homolog, S. cerevisiae) | Homo sapiens |
| 23230  | vacuolar protein sorting 13 homolog A (S. cerevisiae)                                 | Homo sapiens |
| 57198  | ATPase, class I, type 8B, member 2                                                    | Homo sapiens |
| 25915  | NADH dehydrogenase (ubiquinone) 1 alpha subcomplex, assembly factor 3                 | Homo sapiens |
| 23503  | zinc finger, FYVE domain containing 26                                                | Homo sapiens |
| 7867   | mitogen-activated protein kinase-activated protein kinase 3                           | Homo sapiens |
| 11196  | SEC23 interacting protein                                                             | Homo sapiens |
| 89970  | ring finger and SPRY domain containing 1                                              | Homo sapiens |
| 89122  | tripartite motif-containing 4                                                         | Homo sapiens |
| 5606   | mitogen-activated protein kinase kinase 3                                             | Homo sapiens |

|        |                                                                                                             |              |
|--------|-------------------------------------------------------------------------------------------------------------|--------------|
| 56952  | phosphoribosyl transferase domain containing 1                                                              | Homo sapiens |
| 431707 | LIM homeobox 8                                                                                              | Homo sapiens |
| 54494  | chromosome 11 open reading frame 71                                                                         | Homo sapiens |
| 79035  | oligonucleotide/oligosaccharide-binding fold containing 2B                                                  | Homo sapiens |
| 56256  | SERTA domain containing 4                                                                                   | Homo sapiens |
| 55364  | Impact homolog (mouse)                                                                                      | Homo sapiens |
| 84331  | chromosome 16 open reading frame 14                                                                         | Homo sapiens |
| 285313 | immunoglobulin superfamily, member 10                                                                       | Homo sapiens |
| 55270  | nudix (nucleoside diphosphate linked moiety X)-type motif 15                                                | Homo sapiens |
| 1476   | cystatin B (stefin B)                                                                                       | Homo sapiens |
| 10939  | AFG3 ATPase family gene 3-like 2 (yeast)                                                                    | Homo sapiens |
| 9987   | heterogeneous nuclear ribonucleoprotein D-like                                                              | Homo sapiens |
| 85028  | small nucleolar RNA host gene 12 (non-protein coding)                                                       | Homo sapiens |
| 6305   | SET binding factor 1; SET binding factor 1 pseudogene 1                                                     | Homo sapiens |
| 285888 | canopy 1 homolog (zebrafish)                                                                                | Homo sapiens |
| 6234   | ribosomal protein S28 pseudogene 6; ribosomal protein S28 pseudogene 9; ribosomal protein S28               | Homo sapiens |
| 118472 | zinc finger protein 511                                                                                     | Homo sapiens |
| 4204   | methyl CpG binding protein 2 (Rett syndrome)                                                                | Homo sapiens |
| 65123  | integrator complex subunit 3                                                                                | Homo sapiens |
| 4684   | neural cell adhesion molecule 1                                                                             | Homo sapiens |
| 84162  | KIAA1109                                                                                                    | Homo sapiens |
| 3716   | Janus kinase 1                                                                                              | Homo sapiens |
| 88745  | chromosome 6 open reading frame 153                                                                         | Homo sapiens |
| 2491   | centromere protein I                                                                                        | Homo sapiens |
| 701    | budding uninhibited by benzimidazoles 1 homolog beta (yeast)                                                | Homo sapiens |
| 80144  | Fraser syndrome 1                                                                                           | Homo sapiens |
| 3109   | major histocompatibility complex, class II, DM beta                                                         | Homo sapiens |
| 5528   | protein phosphatase 2, regulatory subunit B', delta isoform                                                 | Homo sapiens |
| 25929  | gem (nuclear organelle) associated protein 5                                                                | Homo sapiens |
| 51400  | protein phosphatase methylesterase 1                                                                        | Homo sapiens |
| 3065   | histone deacetylase 1                                                                                       | Homo sapiens |
| 55246  | coiled-coil domain containing 25                                                                            | Homo sapiens |
| 29997  | glioma tumor suppressor candidate region gene 2; glioma tumor suppressor candidate region gene 2 pseudogene | Homo sapiens |
| 4302   | myeloid/lymphoid or mixed-lineage leukemia (trithorax homolog, Drosophila); translocated to, 6              | Homo sapiens |
| 11270  | nurim (nuclear envelope membrane protein)                                                                   | Homo sapiens |
| 10797  | methylenetetrahydrofolate dehydrogenase (NADP+ dependent) 2, methenyltetrahydrofolate cyclohydrolase        | Homo sapiens |
| 57038  | arginyl-tRNA synthetase 2, mitochondrial                                                                    | Homo sapiens |
| 9743   | Rho GTPase-activating protein                                                                               | Homo sapiens |
| 3205   | homeobox A9                                                                                                 | Homo sapiens |
| 23314  | SATB homeobox 2                                                                                             | Homo sapiens |
| 9147   | serologically defined colon cancer antigen 1                                                                | Homo sapiens |
| 54878  | dipeptidyl-peptidase 8                                                                                      | Homo sapiens |
| 440    | asparagine synthetase                                                                                       | Homo sapiens |
| 90321  | zinc finger protein 766                                                                                     | Homo sapiens |
| 79629  | occludin/ELL domain containing 1                                                                            | Homo sapiens |
| 687    | Kruppel-like factor 9                                                                                       | Homo sapiens |
| 79796  | asparagine-linked glycosylation 9, alpha-1,2-mannosyltransferase homolog (S. cerevisiae)                    | Homo sapiens |
| 1327   | cytochrome c oxidase subunit IV isoform 1                                                                   | Homo sapiens |
| 4052   | latent transforming growth factor beta binding protein 1                                                    | Homo sapiens |
| 5437   | polymerase (RNA) II (DNA directed) polypeptide H                                                            | Homo sapiens |
| 9252   | ribosomal protein S6 kinase, 90kDa, polypeptide 5                                                           | Homo sapiens |
| 54606  | DEAD (Asp-Glu-Ala-Asp) box polypeptide 56                                                                   | Homo sapiens |
| 8565   | tyrosyl-tRNA synthetase                                                                                     | Homo sapiens |
| 83879  | cell division cycle associated 7                                                                            | Homo sapiens |
| 734    | oxidative stress induced growth inhibitor family member 2                                                   | Homo sapiens |
| 136    | hypothetical LOC100131909; adenosine A2b receptor                                                           | Homo sapiens |
| 25926  | nucleolar protein 11                                                                                        | Homo sapiens |
| 55972  | solute carrier family 25, member 40                                                                         | Homo sapiens |
| 153222 | chromosome 5 open reading frame 41                                                                          | Homo sapiens |
| 51639  | splicing factor 3B, 14 kDa subunit                                                                          | Homo sapiens |
| 25843  | MOB1, Mps One Binder kinase activator-like 3 (yeast)                                                        | Homo sapiens |
| 760    | carbonic anhydrase II                                                                                       | Homo sapiens |
| 79074  | chromosome 2 open reading frame 49                                                                          | Homo sapiens |
| 256714 | MAP7 domain containing 2                                                                                    | Homo sapiens |
| 4175   | minichromosome maintenance complex component 6                                                              | Homo sapiens |
| 54919  | HEAT repeat containing 2                                                                                    | Homo sapiens |
| 8801   | similar to such; succinate-CoA ligase, GDP-forming, beta subunit                                            | Homo sapiens |
| 728485 | hypothetical protein LOC728485                                                                              | Homo sapiens |
| 132    | adenosine kinase                                                                                            | Homo sapiens |
| 6390   | succinate dehydrogenase complex, subunit B, iron sulfur (Ip)                                                | Homo sapiens |
| 246175 | CCR4-NOT transcription complex, subunit 6-like                                                              | Homo sapiens |
| 115    | adenylate cyclase 9                                                                                         | Homo sapiens |
| 22936  | elongation factor, RNA polymerase II, 2                                                                     | Homo sapiens |

|           |                                                                                                      |              |
|-----------|------------------------------------------------------------------------------------------------------|--------------|
| 347862    | Parkinson disease 7 domain containing 1                                                              | Homo sapiens |
| 246721    | polymerase (RNA) II (DNA directed) polypeptide J3; polymerase (RNA) II (DNA directed) polypeptide J2 | Homo sapiens |
| 84934     | chromosome 12 open reading frame 52                                                                  | Homo sapiens |
| 5747      | PTK2 protein tyrosine kinase 2                                                                       | Homo sapiens |
| 6297      | sal-like 2 (Drosophila)                                                                              | Homo sapiens |
| 56034     | platelet derived growth factor C                                                                     | Homo sapiens |
| 10539     | glutaredoxin 3                                                                                       | Homo sapiens |
| 57498     | kinase D-interacting substrate, 220kDa                                                               | Homo sapiens |
| 79832     | glutamine and serine rich 1                                                                          | Homo sapiens |
| 8243      | structural maintenance of chromosomes 1A                                                             | Homo sapiens |
| 8216      | leucine-zipper-like transcription regulator 1                                                        | Homo sapiens |
| 79000     | chromosome 1 open reading frame 135                                                                  | Homo sapiens |
| 9745      | zinc finger protein 536                                                                              | Homo sapiens |
| 57128     | LYR motif containing 4                                                                               | Homo sapiens |
| 3640      | insulin-like 3 (Leydig cell)                                                                         | Homo sapiens |
| 4942      | ornithine aminotransferase (gyrate atrophy)                                                          | Homo sapiens |
| 22908     | SAC1 suppressor of actin mutations 1-like (yeast)                                                    | Homo sapiens |
| 2140      | eyes absent homolog 3 (Drosophila)                                                                   | Homo sapiens |
| 6176      | ribosomal protein, large, P1                                                                         | Homo sapiens |
| 309       | annexin A6                                                                                           | Homo sapiens |
| 653687    | chromosome X open reading frame 50B; chromosome X open reading frame 50                              | Homo sapiens |
| 26123     | tectonic family member 3                                                                             | Homo sapiens |
| 100132815 | hypothetical protein LOC100132815                                                                    | Homo sapiens |
| 493812    | HLA complex group 11                                                                                 | Homo sapiens |
| 79036     | chromosome 19 open reading frame 50                                                                  | Homo sapiens |
| 55311     | zinc finger protein 444                                                                              | Homo sapiens |
| 140809    | sulfiredoxin 1 homolog (S. cerevisiae)                                                               | Homo sapiens |
| 6950      | hypothetical gene supported by BC000665; t-complex 1                                                 | Homo sapiens |
| 10456     | HCLS1 associated protein X-1                                                                         | Homo sapiens |
| 55526     | dehydrogenase E1 and transketolase domain containing 1                                               | Homo sapiens |
| 51451     | leucine carboxyl methyltransferase 1                                                                 | Homo sapiens |
| 4683      | nibrin                                                                                               | Homo sapiens |
| 51719     | calcium binding protein 39                                                                           | Homo sapiens |
| 56886     | UDP-glucose ceramide glucosyltransferase-like 1                                                      | Homo sapiens |
| 127281    | chromosome 1 open reading frame 93                                                                   | Homo sapiens |
| 55615     | Rho GTPase activating protein 8; proline rich 5 (renal); PRR5-ARHGAP8 fusion                         | Homo sapiens |
| 23779     | Rho GTPase activating protein 8; proline rich 5 (renal); PRR5-ARHGAP8 fusion                         | Homo sapiens |
| 553158    | Rho GTPase activating protein 8; proline rich 5 (renal); PRR5-ARHGAP8 fusion                         | Homo sapiens |
| 283871    | phosphoglycolate phosphatase                                                                         | Homo sapiens |
| 57722     | immunoglobulin superfamily, DCC subclass, member 4                                                   | Homo sapiens |
| 3945      | lactate dehydrogenase B                                                                              | Homo sapiens |
| 7474      | wingless-type MMTV integration site family, member 5A                                                | Homo sapiens |
| 140883    | zinc finger protein 280B                                                                             | Homo sapiens |
| 11333     | PDGFA associated protein 1; similar to PDGFA associated protein 1                                    | Homo sapiens |
| 161779    | piggyBac transposable element derived 4                                                              | Homo sapiens |
| 286053    | non-SMC element 2, MMS21 homolog (S. cerevisiae)                                                     | Homo sapiens |
| 9070      | ash2 (absent, small, or homeotic)-like (Drosophila)                                                  | Homo sapiens |
| 64769     | chromosome 1 open reading frame 149                                                                  | Homo sapiens |
| 143684    | family with sequence similarity 76, member B                                                         | Homo sapiens |
| 80146     | UDP-glucuronate decarboxylase 1                                                                      | Homo sapiens |
| 48        | aconitase 1, soluble                                                                                 | Homo sapiens |
| 10287     | regulator of G-protein signaling 19                                                                  | Homo sapiens |
| 65244     | spermatogenesis associated, serine-rich 2                                                            | Homo sapiens |
| 1337      | cytochrome c oxidase subunit VIa polypeptide 1                                                       | Homo sapiens |
| 50804     | myelin expression factor 2                                                                           | Homo sapiens |
| 119       | adducin 2 (beta)                                                                                     | Homo sapiens |
| 5160      | pyruvate dehydrogenase (lipoamide) alpha 1                                                           | Homo sapiens |
| 92335     | STE20-related kinase adaptor alpha                                                                   | Homo sapiens |
| 91689     | chromosome 22 open reading frame 32                                                                  | Homo sapiens |
| 80764     | THAP domain containing 7                                                                             | Homo sapiens |
| 55553     | SRY (sex determining region Y)-box 6                                                                 | Homo sapiens |
| 6993      | dynein, light chain, Tctex-type 1                                                                    | Homo sapiens |
| 261726    | TIP41, TOR signaling pathway regulator-like (S. cerevisiae)                                          | Homo sapiens |
| 81671     | transmembrane protein 49                                                                             | Homo sapiens |
| 79830     | zinc finger, MYM-type 1                                                                              | Homo sapiens |
| 221955    | diacylglycerol lipase, beta                                                                          | Homo sapiens |
| 11152     | WD repeat domain 45                                                                                  | Homo sapiens |
| 388403    | yippee-like 2 (Drosophila)                                                                           | Homo sapiens |
| 9167      | cytochrome c oxidase subunit VIIa polypeptide 2 like                                                 | Homo sapiens |
| 253943    | YTH domain family, member 3                                                                          | Homo sapiens |
| 51069     | mitochondrial ribosomal protein L2                                                                   | Homo sapiens |
| 5636      | phosphoribosyl pyrophosphate synthetase-associated protein 2                                         | Homo sapiens |
| 220042    | chromosome 11 open reading frame 82                                                                  | Homo sapiens |
| 10280     | sigma non-opioid intracellular receptor 1                                                            | Homo sapiens |
| 5163      | pyruvate dehydrogenase kinase, isozyme 1                                                             | Homo sapiens |
| 9263      | serine/threonine kinase 17a                                                                          | Homo sapiens |

|        |                                                                                                        |              |
|--------|--------------------------------------------------------------------------------------------------------|--------------|
| 8420   | small nucleolar RNA host gene 3 (non-protein coding)                                                   | Homo sapiens |
| 23649  | polymerase (DNA directed), alpha 2 (70kD subunit)                                                      | Homo sapiens |
| 8975   | ubiquitin specific peptidase 13 (isopeptidase T-3)                                                     | Homo sapiens |
| 26747  | nuclear fragile X mental retardation protein interacting protein 1                                     | Homo sapiens |
| 9878   | TOX high mobility group box family member 4                                                            | Homo sapiens |
| 151176 | family with sequence similarity 132, member B                                                          | Homo sapiens |
| 2762   | GDP-mannose 4,6-dehydratase                                                                            | Homo sapiens |
| 55103  | Ral GEF with PH domain and SH3 binding motif 2                                                         | Homo sapiens |
| 10204  | nuclear transport factor 2                                                                             | Homo sapiens |
| 25829  | transmembrane protein 184B                                                                             | Homo sapiens |
| 6433   | splicing factor, arginine/serine-rich 8 (suppressor-of-white-apricot homolog, Drosophila)              | Homo sapiens |
| 5716   | proteasome (prosome, macropain) 26S subunit, non-ATPase, 10                                            | Homo sapiens |
| 378    | ADP-ribosylation factor 4                                                                              | Homo sapiens |
| 83700  | junctional adhesion molecule 3                                                                         | Homo sapiens |
| 84498  | family with sequence similarity 120B                                                                   | Homo sapiens |
| 55010  | chromosome 12 open reading frame 48                                                                    | Homo sapiens |
| 29916  | sorting nexin 11                                                                                       | Homo sapiens |
| 5291   | phosphoinositide-3-kinase, catalytic, beta polypeptide                                                 | Homo sapiens |
| 1656   | DEAD (Asp-Glu-Ala-Asp) box polypeptide 6                                                               | Homo sapiens |
| 3191   | similar to heterogeneous nuclear ribonucleoprotein L-like; heterogeneous nuclear ribonucleoprotein L   | Homo sapiens |
| 54865  | G patch domain containing 4                                                                            | Homo sapiens |
| 4724   | NADH dehydrogenase (ubiquinone) Fe-S protein 4, 18kDa (NADH-coenzyme Q reductase)                      | Homo sapiens |
| 254394 | minichromosome maintenance complex component 9                                                         | Homo sapiens |
| 5077   | paired box 3                                                                                           | Homo sapiens |
| 5525   | protein phosphatase 2, regulatory subunit B', alpha isoform                                            | Homo sapiens |
| 11040  | pim-2 oncogene                                                                                         | Homo sapiens |
| 25776  | chibby homolog 1 (Drosophila)                                                                          | Homo sapiens |
| 55905  | ring finger protein 114                                                                                | Homo sapiens |
| 729021 | hypothetical protein LOC729021                                                                         | Homo sapiens |
| 5980   | REV3-like, catalytic subunit of DNA polymerase zeta (yeast)                                            | Homo sapiens |
| 10114  | homeodomain interacting protein kinase 3                                                               | Homo sapiens |
| 6391   | succinate dehydrogenase complex, subunit C, integral membrane protein, 15kDa                           | Homo sapiens |
| 6713   | squalene epoxidase                                                                                     | Homo sapiens |
| 56940  | similar to mitogen-activated protein kinase phosphatase x; dual specificity phosphatase 22             | Homo sapiens |
| 57647  | DEAH (Asp-Glu-Ala-His) box polypeptide 37                                                              | Homo sapiens |
| 80114  | bicaudal C homolog 1 (Drosophila)                                                                      | Homo sapiens |
| 642236 | similar to FRG1 protein (FSHD region gene 1 protein)                                                   | Homo sapiens |
| 5439   | polymerase (RNA) II (DNA directed) polypeptide J, 13.3kDa                                              | Homo sapiens |
| 9262   | serine/threonine kinase 17b                                                                            | Homo sapiens |
| 401317 | hypothetical LOC401317                                                                                 | Homo sapiens |
| 84864  | MYC induced nuclear antigen                                                                            | Homo sapiens |
| 2054   | syntaxin 2                                                                                             | Homo sapiens |
| 51566  | armadillo repeat containing, X-linked 3                                                                | Homo sapiens |
| 9733   | squamous cell carcinoma antigen recognized by T cells 3                                                | Homo sapiens |
| 64062  | RNA binding motif protein 26                                                                           | Homo sapiens |
| 65125  | WNK lysine deficient protein kinase 1; hypothetical LOC100132369                                       | Homo sapiens |
| 57655  | GRAM domain containing 1A                                                                              | Homo sapiens |
| 57685  | cache domain containing 1                                                                              | Homo sapiens |
| 1719   | dihydrofolate reductase                                                                                | Homo sapiens |
| 56965  | poly (ADP-ribose) polymerase family, member 6                                                          | Homo sapiens |
| 26135  | SERPINE1 mRNA binding protein 1                                                                        | Homo sapiens |
| 23236  | phospholipase C, beta 1 (phosphoinositide-specific)                                                    | Homo sapiens |
| 90871  | chromosome 9 open reading frame 123                                                                    | Homo sapiens |
| 4704   | NADH dehydrogenase (ubiquinone) 1 alpha subcomplex, 9, 39kDa                                           | Homo sapiens |
| 92400  | RNA binding motif protein 18                                                                           | Homo sapiens |
| 4355   | membrane protein, palmitoylated 2 (MAGUK p55 subfamily member 2)                                       | Homo sapiens |
| 57488  | family with sequence similarity 62 (C2 domain containing), member B                                    | Homo sapiens |
| 58505  | oligosaccharyltransferase complex subunit; similar to DC2 protein                                      | Homo sapiens |
| 661    | polymerase (RNA) III (DNA directed) polypeptide D, 44kDa                                               | Homo sapiens |
| 29968  | chromosome 8 open reading frame 62; phosphoserine aminotransferase 1                                   | Homo sapiens |
| 2801   | golgi autoantigen, golgin subfamily a, 2                                                               | Homo sapiens |
| 2241   | fer (fps/fes related) tyrosine kinase                                                                  | Homo sapiens |
| 65264  | ubiquitin-conjugating enzyme E2Z                                                                       | Homo sapiens |
| 55656  | integrator complex subunit 8                                                                           | Homo sapiens |
| 80829  | zinc finger protein 91 homolog (mouse); ZFP91-CNTF readthrough transcript; ciliary neurotrophic factor | Homo sapiens |
| 4905   | N-ethylmaleimide-sensitive factor                                                                      | Homo sapiens |
| 85359  | DiGeorge syndrome critical region gene 6-like                                                          | Homo sapiens |
| 9646   | Ctr9, Paf1/RNA polymerase II complex component, homolog (S. cerevisiae)                                | Homo sapiens |
| 115286 | solute carrier family 25, member 26                                                                    | Homo sapiens |
| 9587   | MAD2L1 binding protein                                                                                 | Homo sapiens |
| 126272 | EP300 interacting inhibitor of differentiation 2B                                                      | Homo sapiens |
| 114044 | MCM3AP antisense RNA (non-protein coding)                                                              | Homo sapiens |
| 51465  | ubiquitin-conjugating enzyme E2, J1 (UBC6 homolog, yeast)                                              | Homo sapiens |



|           |                                                                                                   |              |
|-----------|---------------------------------------------------------------------------------------------------|--------------|
| 51491     | NOP16 nucleolar protein homolog (yeast)                                                           | Homo sapiens |
| 27243     | chromatin modifying protein 2A                                                                    | Homo sapiens |
| 6251      | Ras suppressor protein 1                                                                          | Homo sapiens |
| 51138     | COP9 constitutive photomorphogenic homolog subunit 4 (Arabidopsis)                                | Homo sapiens |
| 10921     | similar to ribonucleic acid binding protein S1; RNA binding protein S1, serine-rich domain        | Homo sapiens |
| 8079      | myeloid leukemia factor 2                                                                         | Homo sapiens |
| 6598      | SWI/SNF related, matrix associated, actin dependent regulator of chromatin, subfamily b, member 1 | Homo sapiens |
| 255783    | hypothetical protein LOC255783                                                                    | Homo sapiens |
| 2870      | G protein-coupled receptor kinase 6                                                               | Homo sapiens |
| 8715      | nucleolar protein 4                                                                               | Homo sapiens |
| 91408     | basic transcription factor 3-like 4; similar to hCG2008008                                        | Homo sapiens |
| 128240    | apolipoprotein A-I binding protein                                                                | Homo sapiens |
| 6732      | SFRS protein kinase 1                                                                             | Homo sapiens |
| 4363      | ATP-binding cassette, sub-family C (CFTR/MRP), member 1                                           | Homo sapiens |
| 3949      | low density lipoprotein receptor                                                                  | Homo sapiens |
| 10473     | high mobility group nucleosomal binding domain 4                                                  | Homo sapiens |
| 3157      | 3-hydroxy-3-methylglutaryl-Coenzyme A synthase 1 (soluble)                                        | Homo sapiens |
| 155066    | ATPase, H+ transporting V0 subunit e2                                                             | Homo sapiens |
| 282969    | chromosome 10 open reading frame 125                                                              | Homo sapiens |
| 170685    | nudix (nucleoside diphosphate linked moiety X)-type motif 10                                      | Homo sapiens |
| 126731    | chromosome 1 open reading frame 96                                                                | Homo sapiens |
| 55500     | ethanolamine kinase 1                                                                             | Homo sapiens |
| 116028    | chromosome 16 open reading frame 75                                                               | Homo sapiens |
| 79801     | SHC SH2-domain binding protein 1                                                                  | Homo sapiens |
| 201562    | protein tyrosine phosphatase-like (proline instead of catalytic arginine), member b               | Homo sapiens |
| 3939      | lactate dehydrogenase A                                                                           | Homo sapiens |
| 151194    | family with sequence similarity 119, member A                                                     | Homo sapiens |
| 51192     | chemokine-like factor                                                                             | Homo sapiens |
| 6472      | serine hydroxymethyltransferase 2 (mitochondrial)                                                 | Homo sapiens |
| 9209      | leucine rich repeat (in FLII) interacting protein 2                                               | Homo sapiens |
| 151742    | protein phosphatase 1 (formerly 2C)-like                                                          | Homo sapiens |
| 5152      | phosphodiesterase 9A                                                                              | Homo sapiens |
| 1762      | dystrophia myotonica, WD repeat containing                                                        | Homo sapiens |
| 6227      | ribosomal protein S21                                                                             | Homo sapiens |
| 5827      | hypothetical LOC100129532; peroxisomal membrane protein 2, 22kDa                                  | Homo sapiens |
| 5018      | oxidase (cytochrome c) assembly 1-like                                                            | Homo sapiens |
| 2739      | glyoxalase I                                                                                      | Homo sapiens |
| 3842      | transportin 1                                                                                     | Homo sapiens |
| 154810    | angiomin like 1                                                                                   | Homo sapiens |
| 55172     | chromosome 14 open reading frame 104                                                              | Homo sapiens |
| 285521    | COX18 cytochrome c oxidase assembly homolog (S. cerevisiae)                                       | Homo sapiens |
| 6430      | splicing factor, arginine/serine-rich 5                                                           | Homo sapiens |
| 4090      | SMAD family member 5                                                                              | Homo sapiens |
| 387103    | chromosome 6 open reading frame 173                                                               | Homo sapiens |
| 201595    | STT3, subunit of the oligosaccharyltransferase complex, homolog B (S. cerevisiae)                 | Homo sapiens |
| 8568      | ribosomal RNA processing 1 homolog (S. cerevisiae)                                                | Homo sapiens |
| 9166      | estrogen receptor binding site associated, antigen, 9                                             | Homo sapiens |
| 6383      | syndecan 2                                                                                        | Homo sapiens |
| 26263     | FBX022 opposite strand (non-protein coding); F-box protein 22                                     | Homo sapiens |
| 23469     | PHD finger protein 3                                                                              | Homo sapiens |
| 55771     | proline rich 11                                                                                   | Homo sapiens |
| 415116    | pim-3 oncogene                                                                                    | Homo sapiens |
| 80150     | asparaginase like 1                                                                               | Homo sapiens |
| 8087      | fragile X mental retardation, autosomal homolog 1                                                 | Homo sapiens |
| 55787     | chromosome X open reading frame 15                                                                | Homo sapiens |
| 55088     | chromosome 10 open reading frame 118                                                              | Homo sapiens |
| 54541     | DNA-damage-inducible transcript 4                                                                 | Homo sapiens |
| 55915     | LanC lantibiotic synthetase component C-like 2 (bacterial)                                        | Homo sapiens |
| 140688    | chromosome 20 open reading frame 112                                                              | Homo sapiens |
| 255812    | succinate dehydrogenase complex, subunit A, flavoprotein pseudogene 1                             | Homo sapiens |
| 51110     | lactamase, beta 2                                                                                 | Homo sapiens |
| 10493     | vesicle amine transport protein 1 homolog (T. californica)                                        | Homo sapiens |
| 4036      | low density lipoprotein-related protein 2                                                         | Homo sapiens |
| 90701     | SEC11 homolog C (S. cerevisiae)                                                                   | Homo sapiens |
| 81034     | solute carrier family 25, member 32                                                               | Homo sapiens |
| 1312      | catechol-O-methyltransferase                                                                      | Homo sapiens |
| 6428      | splicing factor, arginine/serine-rich 3                                                           | Homo sapiens |
| 27097     | TAF5-like RNA polymerase II, p300/CBP-associated factor (PCAF)-associated factor, 65kDa           | Homo sapiens |
| 100132999 | hypothetical protein LOC100132999                                                                 | Homo sapiens |
| 8417      | syntaxin 7                                                                                        | Homo sapiens |
| 3110      | motor neuron and pancreas homeobox 1                                                              | Homo sapiens |
| 7203      | chaperonin containing TCP1, subunit 3 (gamma)                                                     | Homo sapiens |
| 84326     | chromosome 16 open reading frame 13                                                               | Homo sapiens |
| 65008     | mitochondrial ribosomal protein L1                                                                | Homo sapiens |
| 5326      | pleiomorphic adenoma gene-like 2; similar to pleiomorphic adenoma gene-like 2                     | Homo sapiens |

|           |                                                                                                                  |              |
|-----------|------------------------------------------------------------------------------------------------------------------|--------------|
| 6396      | SEC13 homolog ( <i>S. cerevisiae</i> )                                                                           | Homo sapiens |
| 10492     | synaptotagmin binding, cytoplasmic RNA interacting protein                                                       | Homo sapiens |
| 11285     | xylosylprotein beta 1,4-galactosyltransferase, polypeptide 7 (galactosyltransferase I)                           | Homo sapiens |
| 116151    | chromosome 20 open reading frame 108                                                                             | Homo sapiens |
| 23299     | bicaudal D homolog 2 ( <i>Drosophila</i> )                                                                       | Homo sapiens |
| 5578      | protein kinase C, alpha                                                                                          | Homo sapiens |
| 84833     | up-regulated during skeletal muscle growth 5 homolog (mouse)                                                     | Homo sapiens |
| 9825      | spermatogenesis associated 2                                                                                     | Homo sapiens |
| 23012     | serine/threonine kinase 38 like                                                                                  | Homo sapiens |
| 56479     | potassium voltage-gated channel, KQT-like subfamily, member 5                                                    | Homo sapiens |
| 5257      | phosphorylase kinase, beta                                                                                       | Homo sapiens |
| 9092      | squamous cell carcinoma antigen recognized by T cells                                                            | Homo sapiens |
| 51696     | headcase homolog ( <i>Drosophila</i> )                                                                           | Homo sapiens |
| 84159     | AT rich interactive domain 5B (MRF1-like)                                                                        | Homo sapiens |
| 115548    | FCH domain only 2                                                                                                | Homo sapiens |
| 5604      | mitogen-activated protein kinase kinase 1                                                                        | Homo sapiens |
| 83443     | splicing factor 3b, subunit 5, 10kDa                                                                             | Homo sapiens |
| 6457      | SH3-domain GRB2-like 3                                                                                           | Homo sapiens |
| 10269     | zinc metalloproteinase (STE24 homolog, <i>S. cerevisiae</i> )                                                    | Homo sapiens |
| 23211     | zinc finger CCCH-type containing 4                                                                               | Homo sapiens |
| 81605     | ubiquitin related modifier 1 homolog ( <i>S. cerevisiae</i> )                                                    | Homo sapiens |
| 375444    | chromosome 5 open reading frame 34                                                                               | Homo sapiens |
| 10505     | sema domain, immunoglobulin domain (Ig), transmembrane domain (TM) and short cytoplasmic domain, (semaphorin) 4F | Homo sapiens |
| 23191     | cytoplasmic FMR1 interacting protein 1                                                                           | Homo sapiens |
| 4089      | SMAD family member 4                                                                                             | Homo sapiens |
| 54850     | F-box and leucine-rich repeat protein 12                                                                         | Homo sapiens |
| 79710     | MORC family CW-type zinc finger 4                                                                                | Homo sapiens |
| 23141     | ankyrin repeat and LEM domain containing 2                                                                       | Homo sapiens |
| 644       | biliverdin reductase A                                                                                           | Homo sapiens |
| 10209     | similar to eukaryotic translation initiation factor 1; eukaryotic translation initiation factor 1                | Homo sapiens |
| 160518    | DENN/MADD domain containing 5B                                                                                   | Homo sapiens |
| 25778     | dual serine/threonine and tyrosine protein kinase                                                                | Homo sapiens |
| 57659     | zinc finger and BTB domain containing 4                                                                          | Homo sapiens |
| 100132733 | similar to FLJ00310 protein                                                                                      | Homo sapiens |
| 219541    | mediator complex subunit 19                                                                                      | Homo sapiens |
| 5209      | 6-phosphofructo-2-kinase/fructose-2,6-biphosphatase 3                                                            | Homo sapiens |
| 100129637 | hypothetical LOC100129637                                                                                        | Homo sapiens |
| 91947     | arrestin domain containing 4                                                                                     | Homo sapiens |
| 4357      | mercaptopyruvate sulfurtransferase                                                                               | Homo sapiens |
| 8994      | LIM domains containing 1                                                                                         | Homo sapiens |
| 2197      | Finkel-Biskis-Reilly murine sarcoma virus (FBR-MuSV) ubiquitously expressed                                      | Homo sapiens |
| 79707     | nucleolar protein 9                                                                                              | Homo sapiens |
| 23212     | RRS1 ribosome biogenesis regulator homolog ( <i>S. cerevisiae</i> )                                              | Homo sapiens |
| 84896     | ATPase family, AAA domain containing 1                                                                           | Homo sapiens |
| 79693     | yrdC domain containing ( <i>E. coli</i> )                                                                        | Homo sapiens |
| 55388     | minichromosome maintenance complex component 10                                                                  | Homo sapiens |
| 2010      | emerin                                                                                                           | Homo sapiens |
| 9770      | Ras association (RalGDS/AF-6) domain family member 2                                                             | Homo sapiens |
| 26060     | adaptor protein, phosphotyrosine interaction, PH domain and leucine zipper containing 1                          | Homo sapiens |
| 2055      | ceroid-lipofuscinosis, neuronal 8 (epilepsy, progressive with mental retardation)                                | Homo sapiens |
| 387923    | stress-associated endoplasmic reticulum protein family member 2                                                  | Homo sapiens |
| 427       | N-acylsphingosine amidohydrolase (acid ceramidase) 1                                                             | Homo sapiens |
| 2108      | electron-transfer-flavoprotein, alpha polypeptide                                                                | Homo sapiens |
| 387119    | chromosome 6 open reading frame 204                                                                              | Homo sapiens |
| 4077      | neighbor of BRCA1 gene 1                                                                                         | Homo sapiens |
| 83990     | BRCA1 interacting protein C-terminal helicase 1                                                                  | Homo sapiens |
| 84455     | EF-hand calcium binding domain 7                                                                                 | Homo sapiens |
| 166929    | sphingomyelin synthase 2                                                                                         | Homo sapiens |
| 64223     | MTOR associated protein, LST8 homolog ( <i>S. cerevisiae</i> )                                                   | Homo sapiens |
| 6603      | SWI/SNF related, matrix associated, actin dependent regulator of chromatin, subfamily d, member 2                | Homo sapiens |
| 10902     | bromodomain containing 8                                                                                         | Homo sapiens |
| 9590      | A kinase (PRKA) anchor protein 12                                                                                | Homo sapiens |
| 64779     | methenyltetrahydrofolate synthetase domain containing                                                            | Homo sapiens |
| 3856      | keratin 8 pseudogene 9; similar to keratin 8; keratin 8                                                          | Homo sapiens |
| 10467     | zinc finger, HIT type 1                                                                                          | Homo sapiens |
| 6812      | syntaxin binding protein 1                                                                                       | Homo sapiens |
| 79714     | coiled-coil domain containing 51                                                                                 | Homo sapiens |
| 85457     | KIAA1737                                                                                                         | Homo sapiens |
| 10998     | solute carrier family 27 (fatty acid transporter), member 5                                                      | Homo sapiens |
| 2101      | estrogen-related receptor alpha                                                                                  | Homo sapiens |
| 1998      | E74-like factor 2 (ets domain transcription factor)                                                              | Homo sapiens |
| 57713     | Scm-like with four mbt domains 2                                                                                 | Homo sapiens |
| 1820      | AT rich interactive domain 3A (BRIGHT-like)                                                                      | Homo sapiens |
| 7076      | TIMP metalloproteinase inhibitor 1                                                                               | Homo sapiens |

|        |                                                                                                                                                                                                                                                                                                                                                        |              |
|--------|--------------------------------------------------------------------------------------------------------------------------------------------------------------------------------------------------------------------------------------------------------------------------------------------------------------------------------------------------------|--------------|
| 27229  | tubulin, gamma complex associated protein 4                                                                                                                                                                                                                                                                                                            | Homo sapiens |
| 3223   | homeobox C6                                                                                                                                                                                                                                                                                                                                            | Homo sapiens |
| 64326  | ring finger and WD repeat domain 2                                                                                                                                                                                                                                                                                                                     | Homo sapiens |
| 10521  | DEAD (Asp-Glu-Ala-Asp) box polypeptide 17                                                                                                                                                                                                                                                                                                              | Homo sapiens |
| 3921   | ribosomal protein SA pseudogene 9; ribosomal protein SA pseudogene 8; ribosomal protein SA pseudogene 58; ribosomal protein SA pseudogene 19; ribosomal protein SA pseudogene 18; ribosomal protein SA; ribosomal protein SA pseudogene 15; ribosomal protein SA pseudogene 61; ribosomal protein SA pseudogene 29; ribosomal protein SA pseudogene 12 | Homo sapiens |
| 11339  | Opa interacting protein 5                                                                                                                                                                                                                                                                                                                              | Homo sapiens |
| 2625   | GATA binding protein 3                                                                                                                                                                                                                                                                                                                                 | Homo sapiens |
| 5977   | D4, zinc and double PHD fingers family 2                                                                                                                                                                                                                                                                                                               | Homo sapiens |
| 6175   | ribosomal protein, large, P0 pseudogene 2; ribosomal protein, large, P0 pseudogene 3; ribosomal protein, large, P0 pseudogene 6; ribosomal protein, large, P0                                                                                                                                                                                          | Homo sapiens |
| 220717 | ribosomal protein, large, P0 pseudogene 2; ribosomal protein, large, P0 pseudogene 3; ribosomal protein, large, P0 pseudogene 6; ribosomal protein, large, P0                                                                                                                                                                                          | Homo sapiens |
| 10207  | InaD-like (Drosophila)                                                                                                                                                                                                                                                                                                                                 | Homo sapiens |
| 4893   | neuroblastoma RAS viral (v-ras) oncogene homolog                                                                                                                                                                                                                                                                                                       | Homo sapiens |
| 114112 | thioredoxin reductase 3                                                                                                                                                                                                                                                                                                                                | Homo sapiens |
| 64216  | transcription factor B2, mitochondrial                                                                                                                                                                                                                                                                                                                 | Homo sapiens |
| 221035 | receptor accessory protein 3                                                                                                                                                                                                                                                                                                                           | Homo sapiens |
| 4287   | ataxin 3                                                                                                                                                                                                                                                                                                                                               | Homo sapiens |
| 55174  | integrator complex subunit 10                                                                                                                                                                                                                                                                                                                          | Homo sapiens |
| 1933   | eukaryotic translation elongation factor 1 beta 2; eukaryotic translation elongation factor 1 beta 2-like                                                                                                                                                                                                                                              | Homo sapiens |
| 157697 | glutamate-rich 1                                                                                                                                                                                                                                                                                                                                       | Homo sapiens |
| 647070 | hypothetical LOC647070                                                                                                                                                                                                                                                                                                                                 | Homo sapiens |
| 57107  | prenyl (decaprenyl) diphosphate synthase, subunit 2                                                                                                                                                                                                                                                                                                    | Homo sapiens |
| 10023  | frequently rearranged in advanced T-cell lymphomas                                                                                                                                                                                                                                                                                                     | Homo sapiens |
| 284996 | ring finger protein 149                                                                                                                                                                                                                                                                                                                                | Homo sapiens |
| 11047  | adhesion regulating molecule 1                                                                                                                                                                                                                                                                                                                         | Homo sapiens |
| 26610  | elongation protein 4 homolog (S. cerevisiae)                                                                                                                                                                                                                                                                                                           | Homo sapiens |
| 51321  | archaelysin family metallopeptidase 2                                                                                                                                                                                                                                                                                                                  | Homo sapiens |
| 25840  | methyltransferase like 7A                                                                                                                                                                                                                                                                                                                              | Homo sapiens |
| 55133  | S1 RNA binding domain 1                                                                                                                                                                                                                                                                                                                                | Homo sapiens |
| 8293   | small EDRK-rich factor 1A (telomeric); small EDRK-rich factor 1B (centromeric)                                                                                                                                                                                                                                                                         | Homo sapiens |
| 728492 | small EDRK-rich factor 1A (telomeric); small EDRK-rich factor 1B (centromeric)                                                                                                                                                                                                                                                                         | Homo sapiens |
| 578    | BCL2-antagonist/killer 1; BCL2-like 7 pseudogene 1                                                                                                                                                                                                                                                                                                     | Homo sapiens |
| 27241  | Bardet-Biedl syndrome 9                                                                                                                                                                                                                                                                                                                                | Homo sapiens |
| 5885   | RAD21 homolog (S. pombe)                                                                                                                                                                                                                                                                                                                               | Homo sapiens |
| 1975   | similar to eukaryotic translation initiation factor 4H; eukaryotic translation initiation factor 4B                                                                                                                                                                                                                                                    | Homo sapiens |
| 23328  | SAM and SH3 domain containing 1                                                                                                                                                                                                                                                                                                                        | Homo sapiens |
| 2909   | glucocorticoid receptor DNA binding factor 1                                                                                                                                                                                                                                                                                                           | Homo sapiens |
| 63932  | chromosome X open reading frame 56                                                                                                                                                                                                                                                                                                                     | Homo sapiens |
| 1386   | activating transcription factor 2                                                                                                                                                                                                                                                                                                                      | Homo sapiens |
| 148867 | solute carrier family 30 (zinc transporter), member 7                                                                                                                                                                                                                                                                                                  | Homo sapiens |
| 9960   | ubiquitin specific peptidase 3                                                                                                                                                                                                                                                                                                                         | Homo sapiens |
| 8761   | poly(A) binding protein, cytoplasmic 4 (inducible form)                                                                                                                                                                                                                                                                                                | Homo sapiens |
| 665    | ECL2/adenovirus E1B 19kDa interacting protein 3-like                                                                                                                                                                                                                                                                                                   | Homo sapiens |
| 400960 | hypothetical gene supported by BC040598                                                                                                                                                                                                                                                                                                                | Homo sapiens |
| 8496   | PTPRF interacting protein, binding protein 1 (liprin beta 1)                                                                                                                                                                                                                                                                                           | Homo sapiens |
| 57506  | mitochondrial antiviral signaling protein                                                                                                                                                                                                                                                                                                              | Homo sapiens |
| 29922  | non-metastatic cells 7, protein expressed in (nucleoside-diphosphate kinase)                                                                                                                                                                                                                                                                           | Homo sapiens |
| 51150  | stromal cell derived factor 4                                                                                                                                                                                                                                                                                                                          | Homo sapiens |
| 7840   | Alstrom syndrome 1                                                                                                                                                                                                                                                                                                                                     | Homo sapiens |
| 168374 | zinc finger protein 92                                                                                                                                                                                                                                                                                                                                 | Homo sapiens |
| 5481   | peptidylprolyl isomerase D                                                                                                                                                                                                                                                                                                                             | Homo sapiens |
| 4211   | Meis homeobox 1                                                                                                                                                                                                                                                                                                                                        | Homo sapiens |
| 6141   | ribosomal protein L18                                                                                                                                                                                                                                                                                                                                  | Homo sapiens |
| 191    | adenosylhomocysteinase                                                                                                                                                                                                                                                                                                                                 | Homo sapiens |
| 83871  | RAB34, member RAS oncogene family                                                                                                                                                                                                                                                                                                                      | Homo sapiens |
| 51755  | Cdc2-related kinase, arginine/serine-rich                                                                                                                                                                                                                                                                                                              | Homo sapiens |
| 8226   | haloacid dehalogenase-like hydrolase domain containing 1A                                                                                                                                                                                                                                                                                              | Homo sapiens |
| 55163  | pyridoxamine 5'-phosphate oxidase                                                                                                                                                                                                                                                                                                                      | Homo sapiens |
| 4771   | neurofibromin 2 (merlin)                                                                                                                                                                                                                                                                                                                               | Homo sapiens |
| 7336   | ubiquitin-conjugating enzyme E2 variant 2                                                                                                                                                                                                                                                                                                              | Homo sapiens |
| 8805   | tripartite motif-containing 24                                                                                                                                                                                                                                                                                                                         | Homo sapiens |
| 85364  | zinc finger, CCHC domain containing 3                                                                                                                                                                                                                                                                                                                  | Homo sapiens |
| 8908   | glycogenin 2                                                                                                                                                                                                                                                                                                                                           | Homo sapiens |
| 55798  | methyltransferase like 2B                                                                                                                                                                                                                                                                                                                              | Homo sapiens |
| 22930  | RAB3 GTPase activating protein subunit 1 (catalytic)                                                                                                                                                                                                                                                                                                   | Homo sapiens |
| 1163   | CDC28 protein kinase regulatory subunit 1B                                                                                                                                                                                                                                                                                                             | Homo sapiens |
| 122786 | FERM domain containing 6                                                                                                                                                                                                                                                                                                                               | Homo sapiens |
| 131965 | methyltransferase like 6                                                                                                                                                                                                                                                                                                                               | Homo sapiens |
| 284900 | hypothetical LOC284900                                                                                                                                                                                                                                                                                                                                 | Homo sapiens |
| 58489  | family with sequence similarity 108, member C1                                                                                                                                                                                                                                                                                                         | Homo sapiens |
| 56776  | formin 2                                                                                                                                                                                                                                                                                                                                               | Homo sapiens |

|        |                                                                                                                                    |              |
|--------|------------------------------------------------------------------------------------------------------------------------------------|--------------|
| 64431  | ARP6 actin-related protein 6 homolog (yeast)                                                                                       | Homo sapiens |
| 1434   | CSE1 chromosome segregation 1-like (yeast)                                                                                         | Homo sapiens |
| 26511  | cysteine-rich hydrophobic domain 2                                                                                                 | Homo sapiens |
| 80344  | WD repeat domain 23                                                                                                                | Homo sapiens |
| 801    | calmodulin 3 (phosphorylase kinase, delta); calmodulin 2 (phosphorylase kinase, delta); calmodulin 1 (phosphorylase kinase, delta) | Homo sapiens |
| 808    | calmodulin 3 (phosphorylase kinase, delta); calmodulin 2 (phosphorylase kinase, delta); calmodulin 1 (phosphorylase kinase, delta) | Homo sapiens |
| 805    | calmodulin 3 (phosphorylase kinase, delta); calmodulin 2 (phosphorylase kinase, delta); calmodulin 1 (phosphorylase kinase, delta) | Homo sapiens |
| 56675  | nuclear receptor interacting protein 3                                                                                             | Homo sapiens |
| 7405   | UV radiation resistance associated gene                                                                                            | Homo sapiens |
| 10620  | AT rich interactive domain 3B (BRIGHT-like)                                                                                        | Homo sapiens |
| 57461  | ISY1 splicing factor homolog (S. cerevisiae)                                                                                       | Homo sapiens |
| 55763  | exocyst complex component 1                                                                                                        | Homo sapiens |
| 1503   | CTP synthase                                                                                                                       | Homo sapiens |
| 7846   | tubulin, alpha 1a                                                                                                                  | Homo sapiens |
| 7171   | tropomyosin 4                                                                                                                      | Homo sapiens |
| 3612   | inositol (myo)-1 (or 4)-monophosphatase 1                                                                                          | Homo sapiens |
| 8270   | L antigen family, member 3                                                                                                         | Homo sapiens |
| 7025   | nuclear receptor subfamily 2, group F, member 1                                                                                    | Homo sapiens |
| 23549  | aspartyl aminopeptidase                                                                                                            | Homo sapiens |
| 172    | AFG3 ATPase family gene 3-like 1 (S. cerevisiae)                                                                                   | Homo sapiens |
| 113444 | chromosome 1 open reading frame 212                                                                                                | Homo sapiens |
| 6452   | SH3-domain binding protein 2                                                                                                       | Homo sapiens |
| 202052 | DnaJ (Hsp40) homolog, subfamily C, member 18                                                                                       | Homo sapiens |
| 219902 | transmembrane protein 136                                                                                                          | Homo sapiens |
| 6907   | transducin (beta)-like IX-linked                                                                                                   | Homo sapiens |
| 80196  | ring finger protein 34                                                                                                             | Homo sapiens |
| 79752  | zinc finger, AN1-type domain 1                                                                                                     | Homo sapiens |
| 54839  | leucine rich repeat containing 49; similar to leucine rich repeat containing 49                                                    | Homo sapiens |
| 867    | Cas-Br-M (murine) ecotropic retroviral transforming sequence                                                                       | Homo sapiens |
| 5805   | 6-pyruvoyltetrahydropterin synthase                                                                                                | Homo sapiens |
| 79137  | family with sequence similarity 134, member A                                                                                      | Homo sapiens |
| 5687   | proteasome (prosome, macropain) subunit, alpha type, 6                                                                             | Homo sapiens |
| 2781   | guanine nucleotide binding protein (G protein), alpha z polypeptide                                                                | Homo sapiens |
| 2309   | forkhead box O3; forkhead box O3B pseudogene                                                                                       | Homo sapiens |
| 2310   | forkhead box O3; forkhead box O3B pseudogene                                                                                       | Homo sapiens |
| 93627  | TBC domain-containing protein kinase-like                                                                                          | Homo sapiens |
| 120114 | FAT tumor suppressor homolog 3 (Drosophila)                                                                                        | Homo sapiens |
| 387328 | zinc finger protein 322B                                                                                                           | Homo sapiens |
| 641298 | SMG1 homolog, phosphatidylinositol 3-kinase-related kinase pseudogene                                                              | Homo sapiens |
| 6632   | small nuclear ribonucleoprotein D1 polypeptide 16kDa; hypothetical protein LOC100129492                                            | Homo sapiens |
| 90956  | aarF domain containing kinase 2                                                                                                    | Homo sapiens |
| 51318  | mitochondrial ribosomal protein L35                                                                                                | Homo sapiens |
| 8220   | DiGeorge syndrome critical region gene 14                                                                                          | Homo sapiens |
| 4201   | male-enhanced antigen 1                                                                                                            | Homo sapiens |
| 78999  | leucine rich repeat and fibronectin type III domain containing 4                                                                   | Homo sapiens |
| 51290  | ERGIC and golgi 2                                                                                                                  | Homo sapiens |
| 11080  | DnaJ (Hsp40) homolog, subfamily B, member 4                                                                                        | Homo sapiens |
| 28982  | feline leukemia virus subgroup C cellular receptor 1                                                                               | Homo sapiens |
| 55347  | abhydrolase domain containing 10                                                                                                   | Homo sapiens |
| 8792   | tumor necrosis factor receptor superfamily, member 11a, NFKB activator                                                             | Homo sapiens |
| 54469  | zinc finger, AN1-type domain 6                                                                                                     | Homo sapiens |
| 389906 | hypothetical protein LOC441528; similar to hCG1981372; similar to Serine/threonine-protein kinase PRKX (Protein kinase PKX1)       | Homo sapiens |
| 8214   | DiGeorge syndrome critical region gene 6                                                                                           | Homo sapiens |
| 10075  | HECT, UBA and WWE domain containing 1                                                                                              | Homo sapiens |
| 11245  | G protein-coupled receptor 176                                                                                                     | Homo sapiens |
| 341    | apolipoprotein C-I                                                                                                                 | Homo sapiens |
| 135114 | histidine triad nucleotide binding protein 3                                                                                       | Homo sapiens |
| 51144  | hydroxysteroid (17-beta) dehydrogenase 12                                                                                          | Homo sapiens |
| 84961  | F-box and leucine-rich repeat protein 20                                                                                           | Homo sapiens |
| 84705  | GTP binding protein 3 (mitochondrial)                                                                                              | Homo sapiens |
| 51540  | selenocysteine lyase                                                                                                               | Homo sapiens |
| 9392   | transforming growth factor, beta receptor associated protein 1                                                                     | Homo sapiens |
| 11065  | ubiquitin-conjugating enzyme E2C                                                                                                   | Homo sapiens |
| 80020  | FAD-dependent oxidoreductase domain containing 2                                                                                   | Homo sapiens |
| 79762  | chromosome 1 open reading frame 115                                                                                                | Homo sapiens |
| 124045 | chromosome 16 open reading frame 55                                                                                                | Homo sapiens |
| 3475   | interferon-related developmental regulator 1                                                                                       | Homo sapiens |
| 55759  | WD repeat domain 12                                                                                                                | Homo sapiens |
| 22913  | RNA binding protein, autoantigenic (hnRNP-associated with lethal yellow homolog (mouse))                                           | Homo sapiens |
| 55206  | strawberry notch homolog 1 (Drosophila)                                                                                            | Homo sapiens |
| 9456   | homer homolog 1 (Drosophila)                                                                                                       | Homo sapiens |
| 7029   | transcription factor Dp-2 (E2F dimerization partner 2)                                                                             | Homo sapiens |
| 54620  | F-box and leucine-rich repeat protein 19                                                                                           | Homo sapiens |

|        |                                                                                                                                                         |              |
|--------|---------------------------------------------------------------------------------------------------------------------------------------------------------|--------------|
| 4552   | 5-methyltetrahydrofolate-homocysteine methyltransferase reductase                                                                                       | Homo sapiens |
| 84148  | MYST histone acetyltransferase 1                                                                                                                        | Homo sapiens |
| 3839   | karyopherin alpha 3 (importin alpha 4)                                                                                                                  | Homo sapiens |
| 1748   | distal-less homeobox 4                                                                                                                                  | Homo sapiens |
| 55854  | zinc finger CCCH-type containing 15                                                                                                                     | Homo sapiens |
| 10683  | delta-like 3 (Drosophila)                                                                                                                               | Homo sapiens |
| 144363 | LYR motif containing 5                                                                                                                                  | Homo sapiens |
| 130827 | transmembrane protein 182                                                                                                                               | Homo sapiens |
| 6160   | ribosomal protein L31 pseudogene 49; ribosomal protein L31 pseudogene 17; ribosomal protein L31                                                         | Homo sapiens |
| 79095  | chromosome 9 open reading frame 16                                                                                                                      | Homo sapiens |
| 146059 | congenital dyserythropoietic anemia, type I                                                                                                             | Homo sapiens |
| 51574  | La ribonucleoprotein domain family, member 7                                                                                                            | Homo sapiens |
| 4715   | NADH dehydrogenase (ubiquinone) 1 beta subcomplex, 9, 22kDa                                                                                             | Homo sapiens |
| 3364   | HUS1 checkpoint homolog (S. pombe)                                                                                                                      | Homo sapiens |
| 64224  | HERPUD family member 2                                                                                                                                  | Homo sapiens |
| 1968   | eukaryotic translation initiation factor 2, subunit 3 gamma, 52kDa                                                                                      | Homo sapiens |
| 9057   | solute carrier family 7 (cationic amino acid transporter, y+ system), member 6                                                                          | Homo sapiens |
| 3203   | homeobox A6                                                                                                                                             | Homo sapiens |
| 400657 | hypothetical LOC400657                                                                                                                                  | Homo sapiens |
| 157680 | vacuolar protein sorting 13 homolog B (yeast)                                                                                                           | Homo sapiens |
| 253842 | hypothetical protein LOC253842                                                                                                                          | Homo sapiens |
| 339487 | zinc finger and BTB domain containing 8 opposite strand; similar to hCG1645309; similar to zinc finger and BTB domain containing 8 opposite strand      | Homo sapiens |
| 56616  | diablo homolog (Drosophila)                                                                                                                             | Homo sapiens |
| 6921   | similar to elongin C; transcription elongation factor B (SIII), polypeptide 1 (15kDa, elongin C)                                                        | Homo sapiens |
| 22828  | RNA binding motif protein 16                                                                                                                            | Homo sapiens |
| 80155  | NMDA receptor regulated 1                                                                                                                               | Homo sapiens |
| 57189  | KIAA1147                                                                                                                                                | Homo sapiens |
| 157638 | family with sequence similarity 84, member B                                                                                                            | Homo sapiens |
| 23607  | CD2-associated protein                                                                                                                                  | Homo sapiens |
| 9946   | crystallin, zeta (quinone reductase)-like 1                                                                                                             | Homo sapiens |
| 7566   | zinc finger protein 18                                                                                                                                  | Homo sapiens |
| 285812 | hypothetical protein LOC285812                                                                                                                          | Homo sapiens |
| 9694   | tetratricopeptide repeat domain 35                                                                                                                      | Homo sapiens |
| 84300  | chromosome 6 open reading frame 125                                                                                                                     | Homo sapiens |
| 254531 | lysophosphatidylcholine acyltransferase 4                                                                                                               | Homo sapiens |
| 10518  | calcium and integrin binding family member 2                                                                                                            | Homo sapiens |
| 8886   | DEAD (Asp-Glu-Ala-Asp) box polypeptide 18                                                                                                               | Homo sapiens |
| 23321  | tripartite motif-containing 2                                                                                                                           | Homo sapiens |
| 56271  | brain expressed, X-linked 4                                                                                                                             | Homo sapiens |
| 84541  | kelch repeat and BTB (POZ) domain containing 8                                                                                                          | Homo sapiens |
| 9188   | DEAD (Asp-Glu-Ala-Asp) box polypeptide 21                                                                                                               | Homo sapiens |
| 84269  | coiled-coil-helix-coiled-coil-helix domain containing 5                                                                                                 | Homo sapiens |
| 3895   | kinectin 1 (kinesin receptor)                                                                                                                           | Homo sapiens |
| 57062  | DEAD (Asp-Glu-Ala-Asp) box polypeptide 24                                                                                                               | Homo sapiens |
| 149951 | COMM domain containing 7                                                                                                                                | Homo sapiens |
| 10095  | actin related protein 2/3 complex, subunit 1B, 41kDa; similar to Actin-related protein 2/3 complex subunit 1B (ARP2/3 complex 41 kDa subunit) (p41-ARC) | Homo sapiens |
| 10476  | ATP synthase, H+ transporting, mitochondrial F0 complex, subunit d                                                                                      | Homo sapiens |
| 3768   | similar to hkir2.2x; similar to inward rectifying K+ channel negative regulator Kir2.2v; potassium inwardly-rectifying channel, subfamily J, member 12  | Homo sapiens |
| 54675  | cardiolipin synthase 1                                                                                                                                  | Homo sapiens |
| 6128   | ribosomal protein L6 pseudogene 27; ribosomal protein L6 pseudogene 19; ribosomal protein L6; ribosomal protein L6 pseudogene 10                        | Homo sapiens |
| 127602 | dynein, axonemal, heavy chain 14                                                                                                                        | Homo sapiens |
| 23399  | dullard homolog (Xenopus laevis)                                                                                                                        | Homo sapiens |
| 647087 | PL-5283 protein                                                                                                                                         | Homo sapiens |
| 1845   | dual specificity phosphatase 3                                                                                                                          | Homo sapiens |
| 9684   | leucine rich repeat containing 14                                                                                                                       | Homo sapiens |
| 104    | adenosine deaminase, RNA-specific, B1 (RED1 homolog rat)                                                                                                | Homo sapiens |
| 6477   | seven in absentia homolog 1 (Drosophila)                                                                                                                | Homo sapiens |
| 10943  | male-specific lethal 3 homolog (Drosophila)                                                                                                             | Homo sapiens |
| 10299  | membrane-associated ring finger (C3HC4) 6                                                                                                               | Homo sapiens |
| 64965  | mitochondrial ribosomal protein S9                                                                                                                      | Homo sapiens |
| 54623  | Paf1, RNA polymerase II associated factor, homolog (S. cerevisiae)                                                                                      | Homo sapiens |
| 25845  | hypothetical LOC25845                                                                                                                                   | Homo sapiens |
| 645513 | hypothetical LOC645513                                                                                                                                  | Homo sapiens |
| 3608   | interleukin enhancer binding factor 2, 45kDa                                                                                                            | Homo sapiens |
| 55028  | chromosome 17 open reading frame 80                                                                                                                     | Homo sapiens |
| 3241   | hippocalcin-like 1                                                                                                                                      | Homo sapiens |
| 5058   | p21 protein (Cdc42/Rac)-activated kinase 1                                                                                                              | Homo sapiens |
| 29964  | prickle homolog 4 (Drosophila)                                                                                                                          | Homo sapiens |
| 51117  | coenzyme Q4 homolog (S. cerevisiae)                                                                                                                     | Homo sapiens |
| 284018 | chromosome 17 open reading frame 58                                                                                                                     | Homo sapiens |
| 11140  | cell division cycle 37 homolog (S. cerevisiae)                                                                                                          | Homo sapiens |

|           |                                                                                                                                                                                                           |              |
|-----------|-----------------------------------------------------------------------------------------------------------------------------------------------------------------------------------------------------------|--------------|
| 153443    | serum response factor binding protein 1                                                                                                                                                                   | Homo sapiens |
| 25943     | chromosome 20 open reading frame 194                                                                                                                                                                      | Homo sapiens |
| 5380      | postmeiotic segregation increased 2-like 5; postmeiotic segregation increased 2-like 5-like; similar to postmeiotic segregation increased 2-like 2; postmeiotic segregation increased 2-like 2 pseudogene | Homo sapiens |
| 5383      | postmeiotic segregation increased 2-like 5; postmeiotic segregation increased 2-like 5-like; similar to postmeiotic segregation increased 2-like 2; postmeiotic segregation increased 2-like 2 pseudogene | Homo sapiens |
| 339745    | speckle-type POZ protein-like                                                                                                                                                                             | Homo sapiens |
| 2036      | erythrocyte membrane protein band 4.1-like 1                                                                                                                                                              | Homo sapiens |
| 7776      | zinc finger protein 236                                                                                                                                                                                   | Homo sapiens |
| 23369     | pumilio homolog 2 (Drosophila)                                                                                                                                                                            | Homo sapiens |
| 93587     | RNA (guanine-9-) methyltransferase domain containing 2                                                                                                                                                    | Homo sapiens |
| 1859      | dual-specificity tyrosine-(Y)-phosphorylation regulated kinase 1A                                                                                                                                         | Homo sapiens |
| 4047      | lanosterol synthase (2,3-oxidosqualene-lanosterol cyclase)                                                                                                                                                | Homo sapiens |
| 55634     | zinc finger family member 673                                                                                                                                                                             | Homo sapiens |
| 3421      | isocitrate dehydrogenase 3 (NAD+) gamma                                                                                                                                                                   | Homo sapiens |
| 7388      | ubiquinol-cytochrome c reductase hinge protein-like; ubiquinol-cytochrome c reductase hinge protein                                                                                                       | Homo sapiens |
| 2673      | glutamine-fructose-6-phosphate transaminase 1                                                                                                                                                             | Homo sapiens |
| 5814      | purine-rich element binding protein B                                                                                                                                                                     | Homo sapiens |
| 51098     | intraflagellar transport 52 homolog (Chlamydomonas)                                                                                                                                                       | Homo sapiens |
| 1655      | DEAD (Asp-Glu-Ala-Asp) box polypeptide 5                                                                                                                                                                  | Homo sapiens |
| 113612    | cytochrome P450, family 2, subfamily U, polypeptide 1                                                                                                                                                     | Homo sapiens |
| 22839     | discs, large (Drosophila) homolog-associated protein 4                                                                                                                                                    | Homo sapiens |
| 678       | zinc finger protein 36, C3H type-like 2                                                                                                                                                                   | Homo sapiens |
| 6181      | ribosomal protein, large, P2 pseudogene 3; ribosomal protein, large, P2                                                                                                                                   | Homo sapiens |
| 1495      | catenin (cadherin-associated protein), alpha 1, 102kDa                                                                                                                                                    | Homo sapiens |
| 8663      | eukaryotic translation initiation factor 3, subunit C                                                                                                                                                     | Homo sapiens |
| 1690      | coagulation factor C homolog, cochlin (Limulus polyphemus)                                                                                                                                                | Homo sapiens |
| 4245      | mannosyl (alpha-1,3)-glycoprotein beta-1,2-N-acetylglucosaminyltransferase                                                                                                                                | Homo sapiens |
| 55341     | large subunit GTPase 1 homolog (S. cerevisiae)                                                                                                                                                            | Homo sapiens |
| 10781     | zinc finger protein 266                                                                                                                                                                                   | Homo sapiens |
| 8899      | similar to hCG1820375; PRP4 pre-mRNA processing factor 4 homolog B (yeast)                                                                                                                                | Homo sapiens |
| 51102     | mitochondrial trans-2-enoyl-CoA reductase                                                                                                                                                                 | Homo sapiens |
| 284695    | zinc finger protein 326                                                                                                                                                                                   | Homo sapiens |
| 80031     | sema domain, transmembrane domain (TM), and cytoplasmic domain, (semaphorin) 6D                                                                                                                           | Homo sapiens |
| 79612     | NMDA receptor regulated 1-like                                                                                                                                                                            | Homo sapiens |
| 2643      | GTP cyclohydrolase 1                                                                                                                                                                                      | Homo sapiens |
| 5090      | pre-B-cell leukemia homeobox 3                                                                                                                                                                            | Homo sapiens |
| 8317      | cell division cycle 7 homolog (S. cerevisiae)                                                                                                                                                             | Homo sapiens |
| 79805     | vasohibin 2                                                                                                                                                                                               | Homo sapiens |
| 134430    | WD repeat domain 36                                                                                                                                                                                       | Homo sapiens |
| 292       | solute carrier family 25 (mitochondrial carrier; adenine nucleotide translocator), member 5; solute carrier family 25 (mitochondrial carrier; adenine nucleotide translocator), member 5 pseudogene 8     | Homo sapiens |
| 100124700 | hox transcript antisense RNA (non-protein coding)                                                                                                                                                         | Homo sapiens |
| 125488    | tetratricopeptide repeat domain 39C                                                                                                                                                                       | Homo sapiens |
| 56674     | TMEM9 domain family, member B                                                                                                                                                                             | Homo sapiens |
| 92667     | chromosome 20 open reading frame 72                                                                                                                                                                       | Homo sapiens |
| 1525      | coxsackie virus and adenovirus receptor pseudogene 2; coxsackie virus and adenovirus receptor                                                                                                             | Homo sapiens |
| 1104      | regulator of chromosome condensation 1; SNHG3-RCC1 readthrough transcript                                                                                                                                 | Homo sapiens |
| 6596      | helicase-like transcription factor                                                                                                                                                                        | Homo sapiens |
| 56910     | StAR-related lipid transfer (START) domain containing 7                                                                                                                                                   | Homo sapiens |
| 8835      | suppressor of cytokine signaling 2                                                                                                                                                                        | Homo sapiens |
| 1856      | dishevelled, dsh homolog 2 (Drosophila)                                                                                                                                                                   | Homo sapiens |
| 5859      | glutaminyl-tRNA synthetase                                                                                                                                                                                | Homo sapiens |
| 6240      | ribonucleotide reductase M1                                                                                                                                                                               | Homo sapiens |
| 55144     | leucine rich repeat containing 8 family, member D                                                                                                                                                         | Homo sapiens |
| 4647      | myosin VIIA                                                                                                                                                                                               | Homo sapiens |
| 9419      | cysteine-rich PDZ-binding protein                                                                                                                                                                         | Homo sapiens |
| 374977    | chromosome 1 open reading frame 175                                                                                                                                                                       | Homo sapiens |
| 11331     | prohibitin 2                                                                                                                                                                                              | Homo sapiens |
| 84820     | polymerase (RNA) II (DNA directed) polypeptide J4, pseudogene                                                                                                                                             | Homo sapiens |
| 5099      | protocadherin 7                                                                                                                                                                                           | Homo sapiens |
| 29127     | Rac GTPase activating protein 1 pseudogene; Rac GTPase activating protein 1                                                                                                                               | Homo sapiens |
| 10874     | neuromedin U                                                                                                                                                                                              | Homo sapiens |
| 23462     | hairly/enhancer-of-split related with YRPW motif 1                                                                                                                                                        | Homo sapiens |
| 54891     | INO80 complex subunit D                                                                                                                                                                                   | Homo sapiens |
| 23077     | MYC binding protein 2                                                                                                                                                                                     | Homo sapiens |
| 55556     | enolase superfamily member 1                                                                                                                                                                              | Homo sapiens |
| 10469     | translocase of inner mitochondrial membrane 44 homolog (yeast)                                                                                                                                            | Homo sapiens |
| 2806      | glutamic-oxaloacetic transaminase 2, mitochondrial (aspartate aminotransferase 2)                                                                                                                         | Homo sapiens |
| 116254    | chromosome 6 open reading frame 72                                                                                                                                                                        | Homo sapiens |
| 10131     | TNF receptor-associated protein 1                                                                                                                                                                         | Homo sapiens |
| 9683      | NEDD4 binding protein 1                                                                                                                                                                                   | Homo sapiens |

|           |                                                                                          |              |
|-----------|------------------------------------------------------------------------------------------|--------------|
| 4303      | forkhead box 04                                                                          | Homo sapiens |
| 3416      | insulin-degrading enzyme                                                                 | Homo sapiens |
| 8649      | MAPK scaffold protein 1                                                                  | Homo sapiens |
| 26508     | hairy/enhancer-of-split related with YRPW motif-like                                     | Homo sapiens |
| 51160     | vacuolar protein sorting 28 homolog (S. cerevisiae)                                      | Homo sapiens |
| 5150      | phosphodiesterase 7A                                                                     | Homo sapiens |
| 23178     | PAS domain containing serine/threonine kinase                                            | Homo sapiens |
| 8559      | PRP18 pre-mRNA processing factor 18 homolog (S. cerevisiae)                              | Homo sapiens |
| 55179     | Fas apoptotic inhibitory molecule                                                        | Homo sapiens |
| 54532     | ubiquitin specific peptidase 53                                                          | Homo sapiens |
| 84275     | solute carrier family 25, member 33                                                      | Homo sapiens |
| 353322    | ankyrin repeat domain 37                                                                 | Homo sapiens |
| 11092     | chromosome 9 open reading frame 9                                                        | Homo sapiens |
| 3615      | IMP (inosine monophosphate) dehydrogenase 2                                              | Homo sapiens |
| 25948     | kelch repeat and BTB (POZ) domain containing 2                                           | Homo sapiens |
| 124454    | glutamyl-tRNA synthetase 2, mitochondrial (putative)                                     | Homo sapiens |
| 10123     | ADP-ribosylation factor-like 4C                                                          | Homo sapiens |
| 10885     | WD repeat domain 3                                                                       | Homo sapiens |
| 839       | caspase 6, apoptosis-related cysteine peptidase                                          | Homo sapiens |
| 10099     | tetraspanin 3                                                                            | Homo sapiens |
| 64801     | ARV1 homolog (S. cerevisiae)                                                             | Homo sapiens |
| 3303      | heat shock 70kDa protein 1A; heat shock 70kDa protein 1B                                 | Homo sapiens |
| 3304      | heat shock 70kDa protein 1A; heat shock 70kDa protein 1B                                 | Homo sapiens |
| 2120      | ets variant 6                                                                            | Homo sapiens |
| 25983     | neuroguidin, EIF4E binding protein                                                       | Homo sapiens |
| 9516      | lipopolysaccharide-induced TNF factor                                                    | Homo sapiens |
| 55831     | transmembrane protein 111                                                                | Homo sapiens |
| 7049      | transforming growth factor, beta receptor III                                            | Homo sapiens |
| 80208     | spastic paraplegia 11 (autosomal recessive)                                              | Homo sapiens |
| 9367      | RAB9A, member RAS oncogene family                                                        | Homo sapiens |
| 4190      | malate dehydrogenase 1, NAD (soluble)                                                    | Homo sapiens |
| 283357    | hypothetical protein LOC283357                                                           | Homo sapiens |
| 51776     | sterile alpha motif and leucine zipper containing kinase AZK                             | Homo sapiens |
| 64969     | mitochondrial ribosomal protein S5                                                       | Homo sapiens |
| 961       | CD47 molecule                                                                            | Homo sapiens |
| 57544     | thioredoxin domain containing 16                                                         | Homo sapiens |
| 9874      | tousled-like kinase 1                                                                    | Homo sapiens |
| 51741     | WW domain containing oxidoreductase                                                      | Homo sapiens |
| 23325     | KIAA1033                                                                                 | Homo sapiens |
| 8887      | Tax1 (human T-cell leukemia virus type 1) binding protein 1                              | Homo sapiens |
| 8629      | jerky homolog (mouse)                                                                    | Homo sapiens |
| 8991      | selenium binding protein 1                                                               | Homo sapiens |
| 153339    | similar to transmembrane protein 167A; transmembrane protein 167A                        | Homo sapiens |
| 23625     | family with sequence similarity 89, member B                                             | Homo sapiens |
| 2004      | ELK3, ETS-domain protein (SRF accessory protein 2)                                       | Homo sapiens |
| 51765     | serine/threonine protein kinase MST4                                                     | Homo sapiens |
| 79670     | zinc finger, CCHC domain containing 6                                                    | Homo sapiens |
| 117584    | ring finger and FYVE-like domain containing 1                                            | Homo sapiens |
| 132864    | cytoplasmic polyadenylation element binding protein 2                                    | Homo sapiens |
| 9551      | ATP synthase, H+ transporting, mitochondrial F0 complex, subunit F2                      | Homo sapiens |
| 7078      | TIMP metalloproteinase inhibitor 3                                                       | Homo sapiens |
| 23412     | COMM domain containing 3                                                                 | Homo sapiens |
| 60492     | coiled-coil domain containing 90B                                                        | Homo sapiens |
| 131616    | transmembrane protein 42                                                                 | Homo sapiens |
| 3682      | integrin, alpha E (antigen CD103, human mucosal lymphocyte antigen 1; alpha polypeptide) | Homo sapiens |
| 5534      | protein phosphatase 3 (formerly 2B), regulatory subunit B, alpha isoform                 | Homo sapiens |
| 4040      | low density lipoprotein receptor-related protein 6                                       | Homo sapiens |
| 6050      | ribonuclease/angiogenesis inhibitor 1                                                    | Homo sapiens |
| 57728     | WD repeat domain 19                                                                      | Homo sapiens |
| 51246     | shisa homolog 5 (Xenopus laevis)                                                         | Homo sapiens |
| 161742    | sprouty-related, EVH1 domain containing 1                                                | Homo sapiens |
| 113452    | transmembrane protein 54                                                                 | Homo sapiens |
| 22884     | WD repeat domain 37                                                                      | Homo sapiens |
| 376267    | RAB15, member RAS oncogene family                                                        | Homo sapiens |
| 55041     | pleckstrin homology domain containing, family B (evectins) member 2                      | Homo sapiens |
| 114928    | G protein-coupled receptor associated sorting protein 2                                  | Homo sapiens |
| 4814      | ninjurin 1                                                                               | Homo sapiens |
| 30        | acetyl-Coenzyme A acyltransferase 1                                                      | Homo sapiens |
| 100113407 | transmembrane protein 170B                                                               | Homo sapiens |
| 25824     | peroxiredoxin 5                                                                          | Homo sapiens |
| 331       | X-linked inhibitor of apoptosis                                                          | Homo sapiens |
| 55117     | solute carrier family 6 (neutral amino acid transporter), member 15                      | Homo sapiens |
| 7264      | tissue specific transplantation antigen P35B                                             | Homo sapiens |
| 84851     | tripartite motif-containing 52                                                           | Homo sapiens |
| 10328     | COX4 neighbor                                                                            | Homo sapiens |
| 26292     | c-myc binding protein                                                                    | Homo sapiens |
| 7375      | ubiquitin specific peptidase 4 (proto-oncogene)                                          | Homo sapiens |

|           |                                                                                    |              |
|-----------|------------------------------------------------------------------------------------|--------------|
| 1429      | crystallin, zeta (quinone reductase)                                               | Homo sapiens |
| 85019     | chromosome 18 open reading frame 45                                                | Homo sapiens |
| 2876      | glutathione peroxidase 1                                                           | Homo sapiens |
| 51175     | tubulin, epsilon 1                                                                 | Homo sapiens |
| 23201     | family with sequence similarity 168, member A                                      | Homo sapiens |
| 114880    | oxysterol binding protein-like 6                                                   | Homo sapiens |
| 10160     | FERM, RhoGEF (ARHGEF) and pleckstrin domain protein 1 (chondrocyte-derived)        | Homo sapiens |
| 10352     | tryptophanyl tRNA synthetase 2, mitochondrial                                      | Homo sapiens |
| 6309      | sterol-C5-desaturase (ERG3 delta-5-desaturase homolog, <i>S. cerevisiae</i> )-like | Homo sapiens |
| 56339     | methyltransferase like 3                                                           | Homo sapiens |
| 56652     | chromosome 10 open reading frame 2                                                 | Homo sapiens |
| 11014     | KDEL (Lys-Asp-Glu-Leu) endoplasmic reticulum protein retention receptor 2          | Homo sapiens |
| 7389      | uroporphyrinogen decarboxylase                                                     | Homo sapiens |
| 23175     | lipin 1                                                                            | Homo sapiens |
| 5048      | platelet-activating factor acetylhydrolase, isoform Ib, subunit 1 (45kDa)          | Homo sapiens |
| 5878      | RAB5C, member RAS oncogene family                                                  | Homo sapiens |
| 1603      | defender against cell death 1                                                      | Homo sapiens |
| 9942      | xylulokinase homolog ( <i>H. influenzae</i> )                                      | Homo sapiens |
| 51009     | Der1-like domain family, member 2                                                  | Homo sapiens |
| 51373     | mitochondrial ribosomal protein S17                                                | Homo sapiens |
| 10743     | retinoic acid induced 1                                                            | Homo sapiens |
| 10712     | chromosome 1 open reading frame 2                                                  | Homo sapiens |
| 11252     | protein kinase C and casein kinase substrate in neurons 2                          | Homo sapiens |
| 1787      | tRNA aspartic acid methyltransferase 1                                             | Homo sapiens |
| 317649    | eukaryotic translation initiation factor 4E family member 3                        | Homo sapiens |
| 284325    | chromosome 19 open reading frame 54                                                | Homo sapiens |
| 6415      | selenoprotein W, 1                                                                 | Homo sapiens |
| 100131199 | hypothetical LOC100131199                                                          | Homo sapiens |
