# Supplementary material for: Identification and Characterization of 293T Cell-Derived Exosomes by Profiling the Protein, mRNA and MicroRNA Components
Source: PubMed Central journal article supplement (PMC5029934; doi:10.1371/journal.pone.0163043), 2016-09-20
Supplement: pone.0163043.s006.pdf [file pone.0163043.s006.pdf]

| miRBase20_name  | Relative expression level |          |          |
|-----------------|---------------------------|----------|----------|
|                 | 1                         | 2        | 3        |
| hsa-miR-3960    | 13.96115                  | 13.05392 | 13.97293 |
| hsa-miR-1469    | 13.43818                  | 13.22595 | 13.54249 |
| hsa-miR-4497    | 13.29071                  | 13.35728 | 13.48892 |
| hsa-miR-3665    | 13.64416                  | 12.71177 | 13.63597 |
| hsa-miR-4787-5p | 13.56284                  | 12.52972 | 13.50022 |
| hsa-miR-663a    | 12.73929                  | 12.69926 | 12.83888 |
| hsa-miR-1915-3p | 12.87917                  | 11.96779 | 12.80827 |
| hsa-miR-4466    | 12.83579                  | 11.9691  | 12.83579 |
| hsa-miR-638     | 12.73572                  | 12.02388 | 12.67049 |
| hsa-miR-3196    | 12.62125                  | 11.56404 | 12.63003 |
| hsa-miR-4443    | 12.00162                  | 12.82416 | 11.95237 |
| hsa-miR-4508    | 12.59828                  | 11.41813 | 12.67851 |
| hsa-miR-4530    | 12.58204                  | 10.95802 | 12.47933 |
| hsa-miR-1908-5p | 12.04599                  | 11.75771 | 12.20872 |
| hsa-miR-4488    | 12.2456                   | 11.36164 | 12.28999 |
| hsa-miR-2861    | 12.3685                   | 11.1475  | 12.31352 |
| hsa-miR-762     | 11.84846                  | 11.36505 | 11.7676  |
| hsa-miR-4454    | 11.4229                   | 12.184   | 11.20871 |
| hsa-miR-4516    | 12.11074                  | 10.53879 | 12.07627 |
| hsa-miR-149-3p  | 11.64538                  | 11.12281 | 11.64366 |
| hsa-miR-3656    | 11.82006                  | 10.60267 | 11.88987 |
| hsa-miR-4459    | 11.0909                   | 10.80169 | 11.41867 |
| hsa-miR-4687-3p | 11.43802                  | 10.30259 | 11.28878 |
| hsa-miR-4745-5p | 10.61089                  | 10.56661 | 10.83366 |
| hsa-miR-3138    | 10.53921                  | 11.16815 | 10.09984 |
| hsa-miR-1228-5p | 10.7918                   | 10.05949 | 10.9013  |
| hsa-miR-3940-5p | 10.77789                  | 9.59353  | 10.91825 |
| hsa-miR-17-5p   | 10.40851                  | 10.66906 | 10.06982 |
| hsa-miR-106a-5p | 10.25098                  | 10.56575 | 9.997275 |
| hsa-miR-4463    | 10.36979                  | 10.00329 | 10.36979 |
| hsa-miR-4739    | 10.32582                  | 9.887145 | 10.43773 |
| hsa-miR-4763-3p | 10.60375                  | 9.372374 | 10.63761 |
| hsa-miR-4492    | 10.70079                  | 8.819457 | 10.85812 |
| hsa-miR-1275    | 10.06093                  | 10.33434 | 9.71038  |
| hsa-miR-221-3p  | 9.909447                  | 9.981245 | 10.17293 |
| hsa-miR-4707-5p | 10.1075                   | 9.483634 | 10.4425  |
| hsa-miR-20a-5p  | 9.871557                  | 10.25596 | 9.607064 |
| hsa-miR-4532    | 10.27063                  | 8.996542 | 10.11195 |
| hsa-miR-4467    | 10.25619                  | 8.610929 | 10.47193 |
| hsa-miR-4281    | 10.04021                  | 9.023405 | 10.23188 |
| hsa-miR-103a-3p | 10.00755                  | 9.924988 | 9.014766 |
| hsa-miR-222-3p  | 9.56613                   | 9.536891 | 9.81406  |
| hsa-miR-1246    | 9.061166                  | 9.827256 | 9.87962  |
| hsa-miR-4505    | 10.27237                  | 8.356071 | 10.13457 |
| hsa-miR-4651    | 9.817745                  | 8.691956 | 10.24528 |
| hsa-miR-4734    | 9.851258                  | 8.54664  | 10.05148 |
| hsa-miR-92a-3p  | 9.469182                  | 9.619136 | 9.320517 |
| hsa-miR-4484    | 9.180144                  | 9.235891 | 9.883215 |
| hsa-miR-4507    | 10.03173                  | 7.974578 | 10.07106 |
| hsa-miR-4689    | 9.076094                  | 9.18233  | 9.27187  |
| hsa-miR-4270    | 9.193708                  | 8.71347  | 9.598004 |
| hsa-miR-3178    | 9.052498                  | 8.881952 | 9.455199 |

|                  |          |          |          |
|------------------|----------|----------|----------|
| hsa-miR-4695-5p  | 8.87345  | 9.007684 | 9.50814  |
| hsa-miR-320a     | 9.478515 | 8.896557 | 9.012273 |
| hsa-miR-93-5p    | 9.183878 | 9.066558 | 8.976719 |
| hsa-miR-320b     | 9.307963 | 8.832175 | 8.963496 |
| hsa-miR-25-5p    | 8.678685 | 9.503702 | 8.881952 |
| hsa-miR-191-5p   | 8.930536 | 9.027046 | 9.062786 |
| hsa-miR-3135b    | 8.474033 | 8.948259 | 9.567527 |
| hsa-miR-107      | 9.162829 | 9.349047 | 8.403541 |
| hsa-miR-92b-5p   | 8.798225 | 8.842107 | 9.247392 |
| hsa-miR-4674     | 8.924302 | 8.283373 | 9.362763 |
| hsa-miR-320c     | 9.050323 | 8.665651 | 8.689742 |
| hsa-miR-16-5p    | 8.687433 | 8.992015 | 8.597623 |
| hsa-miR-3185     | 9.102942 | 7.543605 | 9.430398 |
| hsa-miR-4741     | 8.714156 | 7.965284 | 9.368228 |
| hsa-miR-1207-5p  | 8.596853 | 8.552185 | 8.831407 |
| hsa-miR-1268a    | 8.459597 | 8.290908 | 8.872475 |
| hsa-miR-18a-5p   | 8.780321 | 8.789124 | 8.028869 |
| hsa-miR-494-3p   | 8.969169 | 7.608939 | 8.855294 |
| hsa-miR-4665-5p  | 8.1557   | 8.589789 | 8.577621 |
| hsa-miR-3621     | 8.411707 | 7.704153 | 8.665652 |
| hsa-miR-4749-5p  | 8.353823 | 7.877018 | 8.434521 |
| hsa-miR-1909-3p  | 8.067466 | 8.279848 | 8.155849 |
| hsa-miR-1268b    | 8.229382 | 7.958693 | 8.26941  |
| hsa-miR-3187-3p  | 7.790599 | 8.499743 | 8.112565 |
| hsa-miR-4433a-3p | 8.270794 | 7.847835 | 8.283432 |
| hsa-miR-361-5p   | 8.320006 | 8.109115 | 7.883978 |
| hsa-miR-4298     | 8.145964 | 8.096842 | 7.976455 |
| hsa-miR-4758-5p  | 8.312499 | 7.617709 | 8.215496 |
| hsa-miR-4668-5p  | 8.029972 | 8.413519 | 7.70105  |
| hsa-miR-4634     | 7.877585 | 8.018074 | 8.241407 |
| hsa-miR-3141     | 8.174576 | 7.757066 | 8.128119 |
