# Supplementary material for: Identification and Characterization of 293T Cell-Derived Exosomes by Profiling the Protein, mRNA and MicroRNA Components
Source: PubMed Central journal article supplement (PMC5029934; doi:10.1371/journal.pone.0163043), 2016-09-20
Supplement: pone.0163043.s007.pdf [file pone.0163043.s007.pdf]

| ENTREZ_GENE_ID | Name                                                                                                                                                            | Species      |
|----------------|-----------------------------------------------------------------------------------------------------------------------------------------------------------------|--------------|
| 63897          | HEAT repeat containing 6                                                                                                                                        | Homo sapiens |
| 26057          | ankyrin repeat domain 17                                                                                                                                        | Homo sapiens |
| 29914          | UbiA prenyltransferase domain containing 1                                                                                                                      | Homo sapiens |
| 55295          | kelch-like 26 (Drosophila)                                                                                                                                      | Homo sapiens |
| 6752           | somatostatin receptor 2                                                                                                                                         | Homo sapiens |
| 84942          | WD repeat domain 73                                                                                                                                             | Homo sapiens |
| 7011           | telomerase-associated protein 1                                                                                                                                 | Homo sapiens |
| 51330          | tumor necrosis factor receptor superfamily, member 12A                                                                                                          | Homo sapiens |
| 79809          | tetratricopeptide repeat domain 21B                                                                                                                             | Homo sapiens |
| 64895          | poly(A) polymerase gamma                                                                                                                                        | Homo sapiens |
| 1130           | lysosomal trafficking regulator                                                                                                                                 | Homo sapiens |
| 94134          | Rho GTPase activating protein 12                                                                                                                                | Homo sapiens |
| 8863           | period homolog 3 (Drosophila)                                                                                                                                   | Homo sapiens |
| 5394           | exosome component 10                                                                                                                                            | Homo sapiens |
| 57510          | exportin 5                                                                                                                                                      | Homo sapiens |
| 55252          | additional sex combs like 2 (Drosophila)                                                                                                                        | Homo sapiens |
| 9778           | KIAA0232                                                                                                                                                        | Homo sapiens |
| 54776          | protein phosphatase 1, regulatory (inhibitor) subunit 12C                                                                                                       | Homo sapiens |
| 7584           | zinc finger protein 35                                                                                                                                          | Homo sapiens |
| 3750           | potassium voltage-gated channel, Shal-related subfamily, member 1                                                                                               | Homo sapiens |
| 54820          | nudE nuclear distribution gene E homolog 1 (A. nidulans)                                                                                                        | Homo sapiens |
| 259230         | sphingomyelin synthase 1                                                                                                                                        | Homo sapiens |
| 4071           | transmembrane 4 L six family member 1                                                                                                                           | Homo sapiens |
| 133            | adrenomedullin                                                                                                                                                  | Homo sapiens |
| 128866         | chromatin modifying protein 4B                                                                                                                                  | Homo sapiens |
| 2843           | G protein-coupled receptor 20                                                                                                                                   | Homo sapiens |
| 64215          | DnaJ (Hsp40) homolog, subfamily C, member 1                                                                                                                     | Homo sapiens |
| 2734           | golgi apparatus protein 1                                                                                                                                       | Homo sapiens |
| 10533          | ATG7 autophagy related 7 homolog (S. cerevisiae)                                                                                                                | Homo sapiens |
| 146862         | unc-45 homolog B (C. elegans)                                                                                                                                   | Homo sapiens |
| 5734           | prostaglandin E receptor 4 (subtype EP4)                                                                                                                        | Homo sapiens |
| 27303          | RNA binding motif, single stranded interacting protein                                                                                                          | Homo sapiens |
| 642346         | similar to golgi autoantigen, golgin subfamily a-like; hypothetical protein LOC440295; hypothetical LOC642346; golgin subfamily A member 6-like protein 10-like | Homo sapiens |
| 440295         | similar to golgi autoantigen, golgin subfamily a-like; hypothetical protein LOC440295; hypothetical LOC642346; golgin subfamily A member 6-like protein 10-like | Homo sapiens |
| 728636         | similar to golgi autoantigen, golgin subfamily a-like; hypothetical protein LOC440295; hypothetical LOC642346; golgin subfamily A member 6-like protein 10-like | Homo sapiens |
| 647042         | similar to golgi autoantigen, golgin subfamily a-like; hypothetical protein LOC440295; hypothetical LOC642346; golgin subfamily A member 6-like protein 10-like | Homo sapiens |
| 27136          | MORC family CW-type zinc finger 1                                                                                                                               | Homo sapiens |
| 201799         | transmembrane protein 154                                                                                                                                       | Homo sapiens |
| 4176           | minichromosome maintenance complex component 7                                                                                                                  | Homo sapiens |
| 55968          | NSFL1 (p97) cofactor (p47)                                                                                                                                      | Homo sapiens |
| 388            | ras homolog gene family, member B                                                                                                                               | Homo sapiens |
| 22801          | integrin, alpha 11                                                                                                                                              | Homo sapiens |
| 91608          | RAS-like, family 10, member B                                                                                                                                   | Homo sapiens |
| 6091           | roundabout, axon guidance receptor, homolog 1 (Drosophila); similar to roundabout 1 isoform b                                                                   | Homo sapiens |
| 642132         | roundabout, axon guidance receptor, homolog 1 (Drosophila); similar to roundabout 1 isoform b                                                                   | Homo sapiens |
| 11238          | inactivation escape 2 (non-protein coding); carbonic anhydrase VB, mitochondrial                                                                                | Homo sapiens |
| 8551           | inactivation escape 2 (non-protein coding); carbonic anhydrase VB, mitochondrial                                                                                | Homo sapiens |
| 56138          | protocadherin alpha 11                                                                                                                                          | Homo sapiens |
| 7542           | zinc finger protein-like 1                                                                                                                                      | Homo sapiens |
| 10291          | splicing factor 3a, subunit 1, 120kDa                                                                                                                           | Homo sapiens |
| 26065          | LSM14A, SCD6 homolog A (S. cerevisiae)                                                                                                                          | Homo sapiens |
| 3162           | heme oxygenase (decycling) 1                                                                                                                                    | Homo sapiens |
| 154743         | chromosome 7 open reading frame 60                                                                                                                              | Homo sapiens |
| 84818          | interleukin 17 receptor C                                                                                                                                       | Homo sapiens |
| 55327          | lin-7 homolog C (C. elegans)                                                                                                                                    | Homo sapiens |
| 23658          | LSM5 homolog, U6 small nuclear RNA associated (S. cerevisiae)                                                                                                   | Homo sapiens |
| 55916          | nuclear transport factor 2-like export factor 2                                                                                                                 | Homo sapiens |
| 7421           | vitamin D (1,25-dihydroxyvitamin D3) receptor                                                                                                                   | Homo sapiens |
| 9493           | kinesin family member 23                                                                                                                                        | Homo sapiens |
| 79078          | chromosome 1 open reading frame 50                                                                                                                              | Homo sapiens |
| 27333          | golgi integral membrane protein 4                                                                                                                               | Homo sapiens |
| 317754         | POTE ankyrin domain family, member D; POTE ankyrin domain family, member C; POTE ankyrin domain family, member B                                                | Homo sapiens |
| 339010         | POTE ankyrin domain family, member D; POTE ankyrin domain family, member C; POTE ankyrin domain family, member B                                                | Homo sapiens |
| 388468         | POTE ankyrin domain family, member D; POTE ankyrin domain family, member C; POTE ankyrin domain family, member B                                                | Homo sapiens |
| 133418         | embigin homolog (mouse)                                                                                                                                         | Homo sapiens |
| 8050           | pyruvate dehydrogenase complex, component X                                                                                                                     | Homo sapiens |
| 22836          | Rho-related BTB domain containing 3                                                                                                                             | Homo sapiens |
| 5339           | similar to Plectin 1 (PLTN) (PCN) (Hemidesmosomal protein 1) (HD1); plectin 1, intermediate filament binding protein 500kDa                                     | Homo sapiens |

|        |                                                                                                                                                                                                                                                     |              |
|--------|-----------------------------------------------------------------------------------------------------------------------------------------------------------------------------------------------------------------------------------------------------|--------------|
| 652460 | similar to Plectin 1 (PLTN) (PCN) (Hemidesmosomal protein 1) (HD1); plectin 1, intermediate filament binding protein 500kDa                                                                                                                         | Homo sapiens |
| 10936  | G protein-coupled receptor 75                                                                                                                                                                                                                       | Homo sapiens |
| 58478  | enolase-phosphatase 1                                                                                                                                                                                                                               | Homo sapiens |
| 51283  | bifunctional apoptosis regulator                                                                                                                                                                                                                    | Homo sapiens |
| 8933   | family with sequence similarity 127, member A                                                                                                                                                                                                       | Homo sapiens |
| 140831 | zinc finger, SWIM-type containing 3                                                                                                                                                                                                                 | Homo sapiens |
| 8867   | synaptojanin 1                                                                                                                                                                                                                                      | Homo sapiens |
| 51031  | glyoxalase domain containing 4                                                                                                                                                                                                                      | Homo sapiens |
| 55810  | forkhead box J2                                                                                                                                                                                                                                     | Homo sapiens |
| 10449  | hypothetical LOC648603; acetyl-Coenzyme A acyltransferase 2                                                                                                                                                                                         | Homo sapiens |
| 648603 | hypothetical LOC648603; acetyl-Coenzyme A acyltransferase 2                                                                                                                                                                                         | Homo sapiens |
| 9480   | one cut homeobox 2                                                                                                                                                                                                                                  | Homo sapiens |
| 9230   | RAB11B, member RAS oncogene family                                                                                                                                                                                                                  | Homo sapiens |
| 4489   | metallothionein 1A                                                                                                                                                                                                                                  | Homo sapiens |
| 55795  | PCI domain containing 2                                                                                                                                                                                                                             | Homo sapiens |
| 966    | CD59 molecule, complement regulatory protein                                                                                                                                                                                                        | Homo sapiens |
| 153241 | centrosomal protein 120kDa                                                                                                                                                                                                                          | Homo sapiens |
| 219654 | zinc finger, CCHC domain containing 24                                                                                                                                                                                                              | Homo sapiens |
| 3488   | insulin-like growth factor binding protein 5                                                                                                                                                                                                        | Homo sapiens |
| 2538   | glucose-6-phosphatase, catalytic subunit                                                                                                                                                                                                            | Homo sapiens |
| 23241  | phosphofurin acidic cluster sorting protein 2                                                                                                                                                                                                       | Homo sapiens |
| 50515  | carbohydrate (chondroitin 4) sulfotransferase 11                                                                                                                                                                                                    | Homo sapiens |
| 3799   | kinesin family member 5B                                                                                                                                                                                                                            | Homo sapiens |
| 1613   | death-associated protein kinase 3                                                                                                                                                                                                                   | Homo sapiens |
| 9896   | FIG4 homolog (S. cerevisiae)                                                                                                                                                                                                                        | Homo sapiens |
| 23151  | TSC22 domain family, member 3; GRAM domain containing 4                                                                                                                                                                                             | Homo sapiens |
| 1831   | TSC22 domain family, member 3; GRAM domain containing 4                                                                                                                                                                                             | Homo sapiens |
| 1052   | CCAAT/enhancer binding protein (C/EBP), delta                                                                                                                                                                                                       | Homo sapiens |
| 2558   | gamma-aminobutyric acid (GABA) A receptor, alpha 5                                                                                                                                                                                                  | Homo sapiens |
| 118738 | zinc finger protein 488                                                                                                                                                                                                                             | Homo sapiens |
| 26234  | F-box and leucine-rich repeat protein 5                                                                                                                                                                                                             | Homo sapiens |
| 83546  | retbindin                                                                                                                                                                                                                                           | Homo sapiens |
| 53833  | interleukin 20 receptor beta                                                                                                                                                                                                                        | Homo sapiens |
| 155060 | zinc finger family member 783                                                                                                                                                                                                                       | Homo sapiens |
| 114785 | methyl-CpG binding domain protein 6                                                                                                                                                                                                                 | Homo sapiens |
| 64375  | IKAROS family zinc finger 4 (Eos)                                                                                                                                                                                                                   | Homo sapiens |
| 7482   | wingless-type MMTV integration site family, member 2B                                                                                                                                                                                               | Homo sapiens |
| 169200 | transmembrane protein 64                                                                                                                                                                                                                            | Homo sapiens |
| 9929   | Josephin domain containing 1                                                                                                                                                                                                                        | Homo sapiens |
| 64151  | non-SMC condensin I complex, subunit G                                                                                                                                                                                                              | Homo sapiens |
| 10527  | importin 7                                                                                                                                                                                                                                          | Homo sapiens |
| 200958 | mucin 20, cell surface associated                                                                                                                                                                                                                   | Homo sapiens |
| 140680 | chromosome 20 open reading frame 96                                                                                                                                                                                                                 | Homo sapiens |
| 200081 | taxilin alpha                                                                                                                                                                                                                                       | Homo sapiens |
| 1629   | dihydrolipoamide branched chain transacylase E2                                                                                                                                                                                                     | Homo sapiens |
| 5888   | RAD51 homolog (RecA homolog, E. coli) (S. cerevisiae)                                                                                                                                                                                               | Homo sapiens |
| 79672  | fructosamine 3 kinase related protein                                                                                                                                                                                                               | Homo sapiens |
| 6867   | transforming, acidic coiled-coil containing protein 1                                                                                                                                                                                               | Homo sapiens |
| 441034 | ribosomal protein L7a pseudogene 70; ribosomal protein L7a; ribosomal protein L7a pseudogene 30; ribosomal protein L7a pseudogene 66; ribosomal protein L7a pseudogene 27; ribosomal protein L7a pseudogene 11; ribosomal protein L7a pseudogene 62 | Homo sapiens |
| 728992 | ribosomal protein L7a pseudogene 70; ribosomal protein L7a; ribosomal protein L7a pseudogene 30; ribosomal protein L7a pseudogene 66; ribosomal protein L7a pseudogene 27; ribosomal protein L7a pseudogene 11; ribosomal protein L7a pseudogene 62 | Homo sapiens |
| 6130   | ribosomal protein L7a pseudogene 70; ribosomal protein L7a; ribosomal protein L7a pseudogene 30; ribosomal protein L7a pseudogene 66; ribosomal protein L7a pseudogene 27; ribosomal protein L7a pseudogene 11; ribosomal protein L7a pseudogene 62 | Homo sapiens |
| 388474 | ribosomal protein L7a pseudogene 70; ribosomal protein L7a; ribosomal protein L7a pseudogene 30; ribosomal protein L7a pseudogene 66; ribosomal protein L7a pseudogene 27; ribosomal protein L7a pseudogene 11; ribosomal protein L7a pseudogene 62 | Homo sapiens |
| 728139 | ribosomal protein L7a pseudogene 70; ribosomal protein L7a; ribosomal protein L7a pseudogene 30; ribosomal protein L7a pseudogene 66; ribosomal protein L7a pseudogene 27; ribosomal protein L7a pseudogene 11; ribosomal protein L7a pseudogene 62 | Homo sapiens |
| 644029 | ribosomal protein L7a pseudogene 70; ribosomal protein L7a; ribosomal protein L7a pseudogene 30; ribosomal protein L7a pseudogene 66; ribosomal protein L7a pseudogene 27; ribosomal protein L7a pseudogene 11; ribosomal protein L7a pseudogene 62 | Homo sapiens |
| 152663 | ribosomal protein L7a pseudogene 70; ribosomal protein L7a; ribosomal protein L7a pseudogene 30; ribosomal protein L7a pseudogene 66; ribosomal protein L7a pseudogene 27; ribosomal protein L7a pseudogene 11; ribosomal protein L7a pseudogene 62 | Homo sapiens |
| 55102  | ATG2 autophagy related 2 homolog B (S. cerevisiae)                                                                                                                                                                                                  | Homo sapiens |
| 10635  | RAD51 associated protein 1                                                                                                                                                                                                                          | Homo sapiens |
| 339448 | chromosome 1 open reading frame 174                                                                                                                                                                                                                 | Homo sapiens |
| 653319 | KIAA0895-like                                                                                                                                                                                                                                       | Homo sapiens |
| 7528   | YY1 transcription factor                                                                                                                                                                                                                            | Homo sapiens |
| 5908   | RAP1B, member of RAS oncogene family                                                                                                                                                                                                                | Homo sapiens |
| 53834  | fibroblast growth factor receptor-like 1                                                                                                                                                                                                            | Homo sapiens |
| 153396 | transmembrane protein 161B                                                                                                                                                                                                                          | Homo sapiens |
| 57602  | ubiquitin specific peptidase 36                                                                                                                                                                                                                     | Homo sapiens |

|           |                                                                                           |              |
|-----------|-------------------------------------------------------------------------------------------|--------------|
| 7392      | upstream transcription factor 2, c-fos interacting                                        | Homo sapiens |
| 728599    | cytokine induced apoptosis inhibitor 1; cytokine induced apoptosis inhibitor 1 pseudogene | Homo sapiens |
| 57019     | cytokine induced apoptosis inhibitor 1; cytokine induced apoptosis inhibitor 1 pseudogene | Homo sapiens |
| 3068      | hepatoma-derived growth factor (high-mobility group protein 1-like)                       | Homo sapiens |
| 10197     | proteasome (prosome, macropain) activator subunit 3 (PA28 gamma; Ki)                      | Homo sapiens |
| 201475    | RAB12, member RAS oncogene family                                                         | Homo sapiens |
| 79183     | tocopherol (alpha) transfer protein-like                                                  | Homo sapiens |
| 23198     | proteasome (prosome, macropain) activator subunit 4                                       | Homo sapiens |
| 55208     | DCN1, defective in cullin neddylation 1, domain containing 2 (S. cerevisiae)              | Homo sapiens |
| 79869     | cleavage and polyadenylation specific factor 7, 59kDa                                     | Homo sapiens |
| 5917      | arginyl-tRNA synthetase                                                                   | Homo sapiens |
| 3915      | laminin, gamma 1 (formerly LAMB2)                                                         | Homo sapiens |
| 29107     | NTF2-like export factor 1                                                                 | Homo sapiens |
| 11054     | opioid growth factor receptor                                                             | Homo sapiens |
| 56970     | ataxin 7-like 3                                                                           | Homo sapiens |
| 140       | adenosine A3 receptor                                                                     | Homo sapiens |
| 641649    | transmembrane protein 91                                                                  | Homo sapiens |
| 4899      | nuclear respiratory factor 1                                                              | Homo sapiens |
| 1152      | creatine kinase, brain                                                                    | Homo sapiens |
| 81931     | zinc finger protein 93                                                                    | Homo sapiens |
| 7536      | splicing factor 1                                                                         | Homo sapiens |
| 87178     | polyribonucleotide nucleotidyltransferase 1                                               | Homo sapiens |
| 114609    | toll-interleukin 1 receptor (TIR) domain containing adaptor protein                       | Homo sapiens |
| 7486      | similar to Werner syndrome protein; Werner syndrome, RecQ helicase-like                   | Homo sapiens |
| 652522    | similar to Werner syndrome protein; Werner syndrome, RecQ helicase-like                   | Homo sapiens |
| 84876     | ORAI calcium release-activated calcium modulator 1                                        | Homo sapiens |
| 56172     | ankylosis, progressive homolog (mouse)                                                    | Homo sapiens |
| 57470     | leucine rich repeat containing 47                                                         | Homo sapiens |
| 55005     | required for meiotic nuclear division 1 homolog (S. cerevisiae)                           | Homo sapiens |
| 11213     | interleukin-1 receptor-associated kinase 3                                                | Homo sapiens |
| 10867     | tetraspanin 9                                                                             | Homo sapiens |
| 3743      | potassium voltage-gated channel, shaker-related subfamily, member 7                       | Homo sapiens |
| 90639     | COX19 cytochrome c oxidase assembly homolog (S. cerevisiae)                               | Homo sapiens |
| 55105     | G patch domain containing 2                                                               | Homo sapiens |
| 171586    | abhydrolase domain containing 3                                                           | Homo sapiens |
| 8641      | protocadherin gamma subfamily B, 4                                                        | Homo sapiens |
| 372       | archain 1                                                                                 | Homo sapiens |
| 84964     | alkB, alkylation repair homolog 6 (E. coli)                                               | Homo sapiens |
| 651746    | ankyrin repeat domain 33B                                                                 | Homo sapiens |
| 4973      | oxidized low density lipoprotein (lectin-like) receptor 1                                 | Homo sapiens |
| 29883     | CCR4-NOT transcription complex, subunit 7                                                 | Homo sapiens |
| 7702      | zinc finger protein 143                                                                   | Homo sapiens |
| 25996     | REX2, RNA exonuclease 2 homolog (S. cerevisiae)                                           | Homo sapiens |
| 56924     | p21 protein (Cdc42/Rac)-activated kinase 6                                                | Homo sapiens |
| 23210     | jumonji domain containing 6                                                               | Homo sapiens |
| 57563     | kelch-like 8 (Drosophila)                                                                 | Homo sapiens |
| 810       | calmodulin-like 3                                                                         | Homo sapiens |
| 57181     | solute carrier family 39 (zinc transporter), member 10                                    | Homo sapiens |
| 51239     | ankyrin repeat domain 39                                                                  | Homo sapiens |
| 79944     | L-2-hydroxyglutarate dehydrogenase                                                        | Homo sapiens |
| 831       | calpastatin                                                                               | Homo sapiens |
| 28962     | osteopetrosis associated transmembrane protein 1                                          | Homo sapiens |
| 26073     | polymerase (DNA-directed), delta interacting protein 2                                    | Homo sapiens |
| 200316    | apolipoprotein B mRNA editing enzyme, catalytic polypeptide-like 3F                       | Homo sapiens |
| 129401    | nucleoporin 35kDa                                                                         | Homo sapiens |
| 6650      | small optic lobes homolog (Drosophila)                                                    | Homo sapiens |
| 10693     | chaperonin containing TCP1, subunit 6B (zeta 2)                                           | Homo sapiens |
| 653441    | polyhomeotic homolog 1B (Drosophila); polyhomeotic homolog 1 (Drosophila)                 | Homo sapiens |
| 1911      | polyhomeotic homolog 1B (Drosophila); polyhomeotic homolog 1 (Drosophila)                 | Homo sapiens |
| 100133042 | glyceraldehyde-3-phosphate dehydrogenase-like 6; hypothetical protein LOC100133042;       | Homo sapiens |
|           | glyceraldehyde-3-phosphate dehydrogenase                                                  |              |
| 729403    | glyceraldehyde-3-phosphate dehydrogenase-like 6; hypothetical protein LOC100133042;       | Homo sapiens |
|           | glyceraldehyde-3-phosphate dehydrogenase                                                  |              |
| 2597      | glyceraldehyde-3-phosphate dehydrogenase-like 6; hypothetical protein LOC100133042;       | Homo sapiens |
|           | glyceraldehyde-3-phosphate dehydrogenase                                                  |              |
| 65056     | GC-rich promoter binding protein 1                                                        | Homo sapiens |
| 170959    | zinc finger protein 431                                                                   | Homo sapiens |
| 343702    | XK, Kell blood group complex subunit-related family, member 7                             | Homo sapiens |
| 54881     | testis expressed 10                                                                       | Homo sapiens |
| 26050     | SLIT and NTRK-like family, member 5                                                       | Homo sapiens |
| 1233      | chemokine (C-C motif) receptor 4                                                          | Homo sapiens |
| 55898     | unc-45 homolog A (C. elegans)                                                             | Homo sapiens |
| 6157      | ribosomal protein L27a                                                                    | Homo sapiens |
| 8760      | CDP-diacylglycerol synthase (phosphatidate cytidyltransferase) 2                          | Homo sapiens |
| 3658      | iron-responsive element binding protein 2                                                 | Homo sapiens |
| 94234     | forkhead box Q1                                                                           | Homo sapiens |
| 2356      | folylpolyglutamate synthase                                                               | Homo sapiens |

|           |                                                                                                                   |              |
|-----------|-------------------------------------------------------------------------------------------------------------------|--------------|
| 9441      | mediator complex subunit 26                                                                                       | Homo sapiens |
| 79842     | zinc finger and BTB domain containing 3                                                                           | Homo sapiens |
| 9371      | kinesin family member 3B                                                                                          | Homo sapiens |
| 92312     | mex-3 homolog A (C. elegans)                                                                                      | Homo sapiens |
| 22838     | ring finger protein 44                                                                                            | Homo sapiens |
| 8802      | succinate-CoA ligase, alpha subunit                                                                               | Homo sapiens |
| 10274     | stromal antigen 1                                                                                                 | Homo sapiens |
| 137492    | vacuolar protein sorting 37 homolog A (S. cerevisiae)                                                             | Homo sapiens |
| 4149      | MYC associated factor X                                                                                           | Homo sapiens |
| 1186      | chloride channel 7                                                                                                | Homo sapiens |
| 2020      | engrailed homeobox 2                                                                                              | Homo sapiens |
| 9467      | SH3-domain binding protein 5 (BTK-associated)                                                                     | Homo sapiens |
| 22832     | KIAA1009                                                                                                          | Homo sapiens |
| 374986    | family with sequence similarity 73, member A                                                                      | Homo sapiens |
| 3575      | interleukin 7 receptor                                                                                            | Homo sapiens |
| 6288      | serum amyloid A1                                                                                                  | Homo sapiens |
| 142678    | mindbomb homolog 2 (Drosophila)                                                                                   | Homo sapiens |
| 56125     | protocadherin beta 11                                                                                             | Homo sapiens |
| 10016     | aryl-hydrocarbon receptor repressor; programmed cell death 6                                                      | Homo sapiens |
| 57491     | aryl-hydrocarbon receptor repressor; programmed cell death 6                                                      | Homo sapiens |
| 8313      | axin 2                                                                                                            | Homo sapiens |
| 646050    | hypothetical LOC653631; hypothetical LOC646050; hypothetical LOC646890; axin interactor, dorsalization associated | Homo sapiens |
| 64853     | hypothetical LOC653631; hypothetical LOC646050; hypothetical LOC646890; axin interactor, dorsalization associated | Homo sapiens |
| 653631    | hypothetical LOC653631; hypothetical LOC646050; hypothetical LOC646890; axin interactor, dorsalization associated | Homo sapiens |
| 646890    | hypothetical LOC653631; hypothetical LOC646050; hypothetical LOC646890; axin interactor, dorsalization associated | Homo sapiens |
| 348995    | nucleoporin 43kDa                                                                                                 | Homo sapiens |
| 54509     | ras homolog gene family, member F (in filopodia)                                                                  | Homo sapiens |
| 192683    | secretory carrier membrane protein 5                                                                              | Homo sapiens |
| 26960     | neurobeachin                                                                                                      | Homo sapiens |
| 219285    | sterile alpha motif domain containing 9-like                                                                      | Homo sapiens |
| 23378     | ribosomal RNA processing 8, methyltransferase, homolog (yeast)                                                    | Homo sapiens |
| 81563     | chromosome 1 open reading frame 21                                                                                | Homo sapiens |
| 200916    | ribosomal protein L22-like 1                                                                                      | Homo sapiens |
| 7923      | hydroxysteroid (17-beta) dehydrogenase 8                                                                          | Homo sapiens |
| 6455      | SH3-domain GRB2-like 1                                                                                            | Homo sapiens |
| 550       | ancient ubiquitous protein 1                                                                                      | Homo sapiens |
| 3018      | histone cluster 1, H2bb                                                                                           | Homo sapiens |
| 51466     | Enah/Vasp-like                                                                                                    | Homo sapiens |
| 9819      | TSC22 domain family, member 2                                                                                     | Homo sapiens |
| 5903      | RAN binding protein 2                                                                                             | Homo sapiens |
| 23560     | GTP binding protein 4                                                                                             | Homo sapiens |
| 3043      | hemoglobin, beta                                                                                                  | Homo sapiens |
| 23302     | WSC domain containing 1                                                                                           | Homo sapiens |
| 54976     | chromosome 20 open reading frame 27                                                                               | Homo sapiens |
| 102       | ADAM metallopeptidase domain 10                                                                                   | Homo sapiens |
| 84263     | hydroxysteroid dehydrogenase like 2                                                                               | Homo sapiens |
| 7343      | upstream binding transcription factor, RNA polymerase I                                                           | Homo sapiens |
| 9181      | Rho/Rac guanine nucleotide exchange factor (GEF) 2                                                                | Homo sapiens |
| 54431     | DnaJ (Hsp40) homolog, subfamily C, member 10                                                                      | Homo sapiens |
| 5223      | phosphoglycerate mutase 1 (brain)                                                                                 | Homo sapiens |
| 81618     | integral membrane protein 2C                                                                                      | Homo sapiens |
| 10494     | serine/threonine kinase 25 (STE20 homolog, yeast)                                                                 | Homo sapiens |
| 440434    | hypothetical protein FLJ11822; aminopeptidase puromycin sensitive                                                 | Homo sapiens |
| 9520      | hypothetical protein FLJ11822; aminopeptidase puromycin sensitive                                                 | Homo sapiens |
| 145195    | chromosome 14 open reading frame 144                                                                              | Homo sapiens |
| 57688     | zinc finger, SWIM-type containing 6                                                                               | Homo sapiens |
| 80264     | zinc finger protein 430                                                                                           | Homo sapiens |
| 9184      | budding uninhibited by benzimidazoles 3 homolog (yeast)                                                           | Homo sapiens |
| 51805     | coenzyme Q3 homolog, methyltransferase (S. cerevisiae)                                                            | Homo sapiens |
| 7415      | valosin-containing protein                                                                                        | Homo sapiens |
| 8729      | golgi-specific brefeldin A resistant guanine nucleotide exchange factor 1                                         | Homo sapiens |
| 100133398 | selenoprotein T; similar to Selenoprotein T                                                                       | Homo sapiens |
| 51714     | selenoprotein T; similar to Selenoprotein T                                                                       | Homo sapiens |
| 1540      | cylindromatosis (turban tumor syndrome)                                                                           | Homo sapiens |
| 100134938 | uroplakin-like protein                                                                                            | Homo sapiens |
| 10922     | Fas-activated serine/threonine kinase                                                                             | Homo sapiens |
| 139411    | patched domain containing 1                                                                                       | Homo sapiens |
| 55173     | mitochondrial ribosomal protein S10                                                                               | Homo sapiens |
| 30851     | Tax1 (human T-cell leukemia virus type I) binding protein 3                                                       | Homo sapiens |
| 63977     | PR domain containing 15                                                                                           | Homo sapiens |
| 126374    | Wilms tumor 1 interacting protein                                                                                 | Homo sapiens |
| 54205     | cytochrome c, somatic                                                                                             | Homo sapiens |
| 56925     | latexin                                                                                                           | Homo sapiens |
| 10564     | ADP-ribosylation factor guanine nucleotide-exchange factor 2 (brefeldin A-inhibited)                              | Homo sapiens |
| 57610     | RAN binding protein 10                                                                                            | Homo sapiens |

|           |                                                                                             |              |
|-----------|---------------------------------------------------------------------------------------------|--------------|
| 57622     | leucine rich repeat and fibronectin type III domain containing 1                            | Homo sapiens |
| 84967     | LSM10, U7 small nuclear RNA associated                                                      | Homo sapiens |
| 134288    | transmembrane protein 174                                                                   | Homo sapiens |
| 9785      | DEAH (Asp-Glu-Ala-His) box polypeptide 38                                                   | Homo sapiens |
| 5527      | protein phosphatase 2, regulatory subunit B', gamma isoform                                 | Homo sapiens |
| 93100     | nicotinate phosphoribosyltransferase domain containing 1                                    | Homo sapiens |
| 58485     | trafficking protein particle complex 1                                                      | Homo sapiens |
| 167410    | Lixl homolog (chicken)                                                                      | Homo sapiens |
| 4913      | nth endonuclease III-like 1 (E. coli)                                                       | Homo sapiens |
| 79680     | chromosome 22 open reading frame 29                                                         | Homo sapiens |
| 10621     | polymerase (RNA) III (DNA directed) polypeptide F, 39 kDa                                   | Homo sapiens |
| 645978    | similar to alkaline ceramidase 2; alkaline ceramidase 2                                     | Homo sapiens |
| 340485    | similar to alkaline ceramidase 2; alkaline ceramidase 2                                     | Homo sapiens |
| 57649     | PHD finger protein 12                                                                       | Homo sapiens |
| 11315     | Parkinson disease (autosomal recessive, early onset) 7                                      | Homo sapiens |
| 7332      | ubiquitin-conjugating enzyme E2L 3                                                          | Homo sapiens |
| 100270710 | hypothetical LOC100270710; MARVEL domain containing 1                                       | Homo sapiens |
| 83742     | hypothetical LOC100270710; MARVEL domain containing 1                                       | Homo sapiens |
| 9628      | regulator of G-protein signaling 6                                                          | Homo sapiens |
| 7757      | zinc finger protein 208                                                                     | Homo sapiens |
| 4696      | NADH dehydrogenase (ubiquinone) 1 alpha subcomplex, 3, 9kDa                                 | Homo sapiens |
| 5914      | retinoic acid receptor, alpha                                                               | Homo sapiens |
| 374879    | zinc finger protein 699                                                                     | Homo sapiens |
| 5563      | protein kinase, AMP-activated, alpha 2 catalytic subunit                                    | Homo sapiens |
| 5127      | PCTAIRE protein kinase 1                                                                    | Homo sapiens |
| 283209    | phosphoglucosyltransferase 2-like 1                                                         | Homo sapiens |
| 9703      | KIAA0100                                                                                    | Homo sapiens |
| 1979      | eukaryotic translation initiation factor 4E binding protein 2                               | Homo sapiens |
| 10730     | YME1-like 1 (S. cerevisiae)                                                                 | Homo sapiens |
| 1995      | ELAV (embryonic lethal, abnormal vision, Drosophila)-like 3 (Hu antigen C)                  | Homo sapiens |
| 23498     | 3-hydroxyanthranilate 3,4-dioxygenase                                                       | Homo sapiens |
| 148423    | chromosome 1 open reading frame 52                                                          | Homo sapiens |
| 2048      | EPH receptor B2                                                                             | Homo sapiens |
| 219899    | tubulin folding cofactor E-like                                                             | Homo sapiens |
| 9258      | malignant fibrous histiocytoma amplified sequence 1                                         | Homo sapiens |
| 338321    | NLR family, pyrin domain containing 9                                                       | Homo sapiens |
| 6102      | retinitis pigmentosa 2 (X-linked recessive)                                                 | Homo sapiens |
| 117177    | RAB3A interacting protein (rabin3)                                                          | Homo sapiens |
| 3843      | importin 5                                                                                  | Homo sapiens |
| 537       | ATPase, H+ transporting, lysosomal accessory protein 1                                      | Homo sapiens |
| 84128     | WD repeat domain 75                                                                         | Homo sapiens |
| 56829     | zinc finger CCCH-type, antiviral 1                                                          | Homo sapiens |
| 7412      | vascular cell adhesion molecule 1                                                           | Homo sapiens |
| 7525      | v-yes-1 Yamaguchi sarcoma viral oncogene homolog 1                                          | Homo sapiens |
| 51386     | eukaryotic translation initiation factor 3, subunit L                                       | Homo sapiens |
| 9575      | clock homolog (mouse)                                                                       | Homo sapiens |
| 51301     | glucosaminyl (N-acetyl) transferase 4, core 2 (beta-1,6-N-acetylglucosaminyltransferase)    | Homo sapiens |
| 79041     | transmembrane protein 38A                                                                   | Homo sapiens |
| 6651      | SON DNA binding protein                                                                     | Homo sapiens |
| 11160     | ER lipid raft associated 2                                                                  | Homo sapiens |
| 7294      | TXK tyrosine kinase                                                                         | Homo sapiens |
| 23235     | salt-inducible kinase 2                                                                     | Homo sapiens |
| 5743      | prostaglandin-endoperoxide synthase 2 (prostaglandin G/H synthase and cyclooxygenase)       | Homo sapiens |
| 11004     | kinesin family member 2C                                                                    | Homo sapiens |
| 83714     | nuclear receptor interacting protein 2                                                      | Homo sapiens |
| 7021      | transcription factor AP-2 beta (activating enhancer binding protein 2 beta)                 | Homo sapiens |
| 7086      | transketolase                                                                               | Homo sapiens |
| 9797      | TatD DNase domain containing 2                                                              | Homo sapiens |
| 283985    | fatty acid desaturase domain family, member 6                                               | Homo sapiens |
| 2631      | glioblastoma amplified sequence                                                             | Homo sapiens |
| 65267     | WNK lysine deficient protein kinase 3                                                       | Homo sapiens |
| 283130    | solute carrier family 25, member 45                                                         | Homo sapiens |
| 79441     | HAUS augmin-like complex, subunit 3                                                         | Homo sapiens |
| 54149     | chromosome 21 open reading frame 91                                                         | Homo sapiens |
| 51090     | plasma membrane proteolipid (plasmolipin)                                                   | Homo sapiens |
| 126298    | immunity-related GTPase family, Q                                                           | Homo sapiens |
| 23287     | ATP/GTP binding protein 1                                                                   | Homo sapiens |
| 293       | solute carrier family 25 (mitochondrial carrier; adenine nucleotide translocator), member 6 | Homo sapiens |
| 10794     | zinc finger protein 460                                                                     | Homo sapiens |
| 10644     | insulin-like growth factor 2 mRNA binding protein 2                                         | Homo sapiens |
| 6664      | SRX (sex determining region Y)-box 11                                                       | Homo sapiens |
| 79576     | NFKB activating protein                                                                     | Homo sapiens |
| 1209      | cleft lip and palate associated transmembrane protein 1                                     | Homo sapiens |
| 51247     | poly(A) binding protein interacting protein 2                                               | Homo sapiens |
| 51125     | golgi autoantigen, golgin subfamily a, 7                                                    | Homo sapiens |
| 6878      | TAF6 RNA polymerase II, TATA box binding protein (TBP)-associated factor, 80kDa             | Homo sapiens |
| 283514    | seven in absentia homolog 3 (Drosophila)                                                    | Homo sapiens |
| 716       | complement component 1, s subcomponent                                                      | Homo sapiens |

|        |                                                                                               |              |
|--------|-----------------------------------------------------------------------------------------------|--------------|
| 121457 | IKK interacting protein                                                                       | Homo sapiens |
| 8888   | minichromosome maintenance complex component 3 associated protein                             | Homo sapiens |
| 9215   | like-glycosyltransferase                                                                      | Homo sapiens |
| 10615  | sperm associated antigen 5                                                                    | Homo sapiens |
| 9117   | SEC22 vesicle trafficking protein homolog C ( <i>S. cerevisiae</i> )                          | Homo sapiens |
| 560    | azoospermia factor 1                                                                          | Homo sapiens |
| 83544  | dynein, axonemal, light chain 1                                                               | Homo sapiens |
| 26128  | KIAA1279                                                                                      | Homo sapiens |
| 254228 | family with sequence similarity 26, member E                                                  | Homo sapiens |
| 2975   | general transcription factor IIIC, polypeptide 1, alpha 220kDa                                | Homo sapiens |
| 57590  | WD repeat and FYVE domain containing 1                                                        | Homo sapiens |
| 8884   | solute carrier family 5 (sodium-dependent vitamin transporter), member 6                      | Homo sapiens |
| 5311   | polycystic kidney disease 2 (autosomal dominant)                                              | Homo sapiens |
| 8740   | tumor necrosis factor (ligand) superfamily, member 14                                         | Homo sapiens |
| 10769  | polo-like kinase 2 ( <i>Drosophila</i> )                                                      | Homo sapiens |
| 5170   | 3-phosphoinositide dependent protein kinase-1                                                 | Homo sapiens |
| 3383   | intercellular adhesion molecule 1                                                             | Homo sapiens |
| 2232   | ferredoxin reductase                                                                          | Homo sapiens |
| 112885 | PHD finger protein 21B                                                                        | Homo sapiens |
| 284434 | NACHT and WD repeat domain containing 1                                                       | Homo sapiens |
| 5464   | pyrophosphatase (inorganic) 1                                                                 | Homo sapiens |
| 92370  | acid phosphatase-like 2                                                                       | Homo sapiens |
| 23348  | dedicator of cytokinesis 9                                                                    | Homo sapiens |
| 51768  | transmembrane 7 superfamily member 3                                                          | Homo sapiens |
| 6722   | serum response factor (c-fos serum response element-binding transcription factor)             | Homo sapiens |
| 5110   | protein-L-isoaspartate (D-aspartate) O-methyltransferase                                      | Homo sapiens |
| 57619  | shroom family member 3                                                                        | Homo sapiens |
| 90780  | pygopus homolog 2 ( <i>Drosophila</i> )                                                       | Homo sapiens |
| 23588  | kelch domain containing 2                                                                     | Homo sapiens |
| 7107   | G protein-coupled receptor 137B                                                               | Homo sapiens |
| 80308  | FAD1 flavin adenine dinucleotide synthetase homolog ( <i>S. cerevisiae</i> )                  | Homo sapiens |
| 9583   | ectonucleoside triphosphate diphosphohydrolase 4                                              | Homo sapiens |
| 55610  | coiled-coil domain containing 132                                                             | Homo sapiens |
| 11338  | U2 small nuclear RNA auxiliary factor 2                                                       | Homo sapiens |
| 55278  | glutaminyl-tRNA synthase (glutamine-hydrolyzing)-like 1                                       | Homo sapiens |
| 6135   | ribosomal protein L11                                                                         | Homo sapiens |
| 541565 | chromosome 8 open reading frame 58                                                            | Homo sapiens |
| 2823   | glycoprotein M6A                                                                              | Homo sapiens |
| 10567  | Rab acceptor 1 (prenylated)                                                                   | Homo sapiens |
| 80778  | zinc finger protein 34                                                                        | Homo sapiens |
| 2081   | endoplasmic reticulum to nucleus signaling 1                                                  | Homo sapiens |
| 55255  | WD repeat domain 41                                                                           | Homo sapiens |
| 9758   | FERM and PDZ domain containing 4                                                              | Homo sapiens |
| 64784  | CREB regulated transcription coactivator 3                                                    | Homo sapiens |
| 65983  | GRAM domain containing 3                                                                      | Homo sapiens |
| 6272   | sortilin 1                                                                                    | Homo sapiens |
| 23119  | hypermethylated in cancer 2                                                                   | Homo sapiens |
| 64318  | nucleolar complex associated 3 homolog ( <i>S. cerevisiae</i> )                               | Homo sapiens |
| 7311   | ubiquitin A-52 residue ribosomal protein fusion product 1                                     | Homo sapiens |
| 5270   | serpin peptidase inhibitor, clade E (nexin, plasminogen activator inhibitor type 1), member 2 | Homo sapiens |
| 8334   | histone cluster 1, H2ac                                                                       | Homo sapiens |
| 51006  | solute carrier family 35, member C2                                                           | Homo sapiens |
| 6520   | solute carrier family 3 (activators of dibasic and neutral amino acid transport), member 2    | Homo sapiens |
| 132989 | chromosome 4 open reading frame 36                                                            | Homo sapiens |
| 9271   | piwi-like 1 ( <i>Drosophila</i> )                                                             | Homo sapiens |
| 7363   | UDP glucuronosyltransferase 2 family, polypeptide B4                                          | Homo sapiens |
| 29924  | epsin 1                                                                                       | Homo sapiens |
| 311    | annexin A11                                                                                   | Homo sapiens |
| 5126   | proprotein convertase subtilisin/kexin type 2                                                 | Homo sapiens |
| 25927  | cannabinoid receptor interacting protein 1                                                    | Homo sapiens |
| 64110  | melanoma antigen family F, 1                                                                  | Homo sapiens |
| 7227   | trichorhinophalangeal syndrome I                                                              | Homo sapiens |
| 9278   | zinc finger and BTB domain containing 22                                                      | Homo sapiens |
| 8241   | RNA binding motif protein 10                                                                  | Homo sapiens |
| 57082  | cancer susceptibility candidate 5                                                             | Homo sapiens |
| 23194  | F-box and leucine-rich repeat protein 7                                                       | Homo sapiens |
| 644815 | family with sequence similarity 83, member G                                                  | Homo sapiens |
| 55296  | TBC1 domain family, member 19                                                                 | Homo sapiens |
| 1770   | dynein, axonemal, heavy chain 9                                                               | Homo sapiens |
| 159091 | family with sequence similarity 122C                                                          | Homo sapiens |
| 57701  | KIAA1602                                                                                      | Homo sapiens |
| 8942   | kynureninase (L-kynurenine hydrolase)                                                         | Homo sapiens |
| 165829 | G protein-coupled receptor 156                                                                | Homo sapiens |
| 57178  | zinc finger, MIZ-type containing 1                                                            | Homo sapiens |
| 56650  | claudin domain containing 1                                                                   | Homo sapiens |
| 10399  | guanine nucleotide binding protein (G protein), beta polypeptide 2-like 1                     | Homo sapiens |
| 284339 | transmembrane protein 145                                                                     | Homo sapiens |

|           |                                                                                                                                                                                       |              |
|-----------|---------------------------------------------------------------------------------------------------------------------------------------------------------------------------------------|--------------|
| 79853     | transmembrane 4 L six family member 20                                                                                                                                                | Homo sapiens |
| 5296      | phosphoinositide-3-kinase, regulatory subunit 2 (beta)                                                                                                                                | Homo sapiens |
| 147339    | chromosome 18 open reading frame 25                                                                                                                                                   | Homo sapiens |
| 79862     | zinc finger protein 669                                                                                                                                                               | Homo sapiens |
| 8482      | semaphorin 7A, GPI membrane anchor (John Milton Hagen blood group)                                                                                                                    | Homo sapiens |
| 5717      | proteasome (prosome, macropain) 26S subunit, non-ATPase, 11                                                                                                                           | Homo sapiens |
| 4881      | natriuretic peptide receptor A/guanylate cyclase A (atrionatriuretic peptide receptor A)                                                                                              | Homo sapiens |
| 23766     | GABA(A) receptors associated protein like 3 (pseudogene); GABA(A) receptor-associated protein like 1                                                                                  | Homo sapiens |
| 23710     | GABA(A) receptors associated protein like 3 (pseudogene); GABA(A) receptor-associated protein like 1                                                                                  | Homo sapiens |
| 9391      | cytosolic iron-sulfur protein assembly 1 homolog (S. cerevisiae)                                                                                                                      | Homo sapiens |
| 54815     | GATA zinc finger domain containing 2A                                                                                                                                                 | Homo sapiens |
| 8993      | peptidoglycan recognition protein 1                                                                                                                                                   | Homo sapiens |
| 51124     | immediate early response 3 interacting protein 1                                                                                                                                      | Homo sapiens |
| 6132      | ribosomal protein L8; ribosomal protein L8 pseudogene 2                                                                                                                               | Homo sapiens |
| 100128766 | ribosomal protein L8; ribosomal protein L8 pseudogene 2                                                                                                                               | Homo sapiens |
| 5782      | protein tyrosine phosphatase, non-receptor type 12                                                                                                                                    | Homo sapiens |
| 9370      | adiponectin, C1Q and collagen domain containing                                                                                                                                       | Homo sapiens |
| 100130757 | chromosome 10 open reading frame 71; similar to hCG1996658                                                                                                                            | Homo sapiens |
| 118461    | chromosome 10 open reading frame 71; similar to hCG1996658                                                                                                                            | Homo sapiens |
| 1727      | cytochrome b5 reductase 3                                                                                                                                                             | Homo sapiens |
| 10239     | adaptor-related protein complex 3, sigma 2 subunit                                                                                                                                    | Homo sapiens |
| 375298    | ceramide kinase-like                                                                                                                                                                  | Homo sapiens |
| 54858     | pyroglutamyl-peptidase I                                                                                                                                                              | Homo sapiens |
| 26130     | GTPase activating protein and VPS9 domains 1                                                                                                                                          | Homo sapiens |
| 25809     | tubulin tyrosine ligase-like family, member 1                                                                                                                                         | Homo sapiens |
| 405       | aryl hydrocarbon receptor nuclear translocator                                                                                                                                        | Homo sapiens |
| 9612      | nuclear receptor co-repressor 2                                                                                                                                                       | Homo sapiens |
| 253260    | RPTOR independent companion of MTOR, complex 2                                                                                                                                        | Homo sapiens |
| 3312      | heat shock 70kDa protein 8                                                                                                                                                            | Homo sapiens |
| 57693     | zinc finger protein 317                                                                                                                                                               | Homo sapiens |
| 9352      | thioredoxin-like 1                                                                                                                                                                    | Homo sapiens |
| 3646      | eukaryotic translation initiation factor 3, subunit E                                                                                                                                 | Homo sapiens |
| 399804    | nucleophosmin 1 (nucleolar phosphoprotein B23, numatrin) pseudogene 21; hypothetical LOC100131044; similar to nucleophosmin 1; nucleophosmin (nucleolar phosphoprotein B23, numatrin) | Homo sapiens |
| 4869      | nucleophosmin 1 (nucleolar phosphoprotein B23, numatrin) pseudogene 21; hypothetical LOC100131044; similar to nucleophosmin 1; nucleophosmin (nucleolar phosphoprotein B23, numatrin) | Homo sapiens |
| 100131044 | nucleophosmin 1 (nucleolar phosphoprotein B23, numatrin) pseudogene 21; hypothetical LOC100131044; similar to nucleophosmin 1; nucleophosmin (nucleolar phosphoprotein B23, numatrin) | Homo sapiens |
| 729342    | nucleophosmin 1 (nucleolar phosphoprotein B23, numatrin) pseudogene 21; hypothetical LOC100131044; similar to nucleophosmin 1; nucleophosmin (nucleolar phosphoprotein B23, numatrin) | Homo sapiens |
| 440577    | nucleophosmin 1 (nucleolar phosphoprotein B23, numatrin) pseudogene 21; hypothetical LOC100131044; similar to nucleophosmin 1; nucleophosmin (nucleolar phosphoprotein B23, numatrin) | Homo sapiens |
| 100129237 | nucleophosmin 1 (nucleolar phosphoprotein B23, numatrin) pseudogene 21; hypothetical LOC100131044; similar to nucleophosmin 1; nucleophosmin (nucleolar phosphoprotein B23, numatrin) | Homo sapiens |
| 729686    | nucleophosmin 1 (nucleolar phosphoprotein B23, numatrin) pseudogene 21; hypothetical LOC100131044; similar to nucleophosmin 1; nucleophosmin (nucleolar phosphoprotein B23, numatrin) | Homo sapiens |
| 220359    | tigger transposable element derived 3                                                                                                                                                 | Homo sapiens |
| 57634     | E1A binding protein p400                                                                                                                                                              | Homo sapiens |
| 10844     | tubulin, gamma complex associated protein 2                                                                                                                                           | Homo sapiens |
| 51111     | suppressor of variegation 4-20 homolog 1 (Drosophila)                                                                                                                                 | Homo sapiens |
| 1730      | diaphanous homolog 2 (Drosophila)                                                                                                                                                     | Homo sapiens |
| 23131     | G patch domain containing 8                                                                                                                                                           | Homo sapiens |
| 3996      | lethal giant larvae homolog 1 (Drosophila)                                                                                                                                            | Homo sapiens |
| 5531      | protein phosphatase 4 (formerly X), catalytic subunit                                                                                                                                 | Homo sapiens |
| 2561      | gamma-aminobutyric acid (GABA) A receptor, beta 2                                                                                                                                     | Homo sapiens |
| 161931    | adenosine deaminase domain containing 2                                                                                                                                               | Homo sapiens |
| 1493      | cytotoxic T-lymphocyte-associated protein 4                                                                                                                                           | Homo sapiens |
| 2629      | glucosidase, beta; acid (includes glucosylceramidase)                                                                                                                                 | Homo sapiens |
| 1616      | death-domain associated protein                                                                                                                                                       | Homo sapiens |
| 3788      | potassium voltage-gated channel, delayed-rectifier, subfamily S, member 2                                                                                                             | Homo sapiens |
| 84262     | proteasome (prosome, macropain) assembly chaperone 3                                                                                                                                  | Homo sapiens |
| 93487     | mitogen-activated protein kinase 1 interacting protein 1-like                                                                                                                         | Homo sapiens |
| 641339    | zinc finger family member 674                                                                                                                                                         | Homo sapiens |
| 5594      | mitogen-activated protein kinase 1                                                                                                                                                    | Homo sapiens |
| 5357      | plastin 1 (I isoform)                                                                                                                                                                 | Homo sapiens |
| 3764      | potassium inwardly-rectifying channel, subfamily J, member 8                                                                                                                          | Homo sapiens |
| 9249      | dehydrogenase/reductase (SDR family) member 3                                                                                                                                         | Homo sapiens |
| 5264      | phytanoyl-CoA 2-hydroxylase                                                                                                                                                           | Homo sapiens |
| 339855    | kyphoscoliosis peptidase                                                                                                                                                              | Homo sapiens |
| 5681      | protein serine kinase H1                                                                                                                                                              | Homo sapiens |

|           |                                                                                                                                                                                                       |              |
|-----------|-------------------------------------------------------------------------------------------------------------------------------------------------------------------------------------------------------|--------------|
| 1595      | cytochrome P450, family 51, subfamily A, polypeptide 1                                                                                                                                                | Homo sapiens |
| 10440     | translocase of inner mitochondrial membrane 17 homolog A (yeast)                                                                                                                                      | Homo sapiens |
| 55209     | SET domain containing 5                                                                                                                                                                               | Homo sapiens |
| 53346     | transmembrane 6 superfamily member 1                                                                                                                                                                  | Homo sapiens |
| 64167     | endoplasmic reticulum aminopeptidase 2                                                                                                                                                                | Homo sapiens |
| 25963     | transmembrane protein 87A                                                                                                                                                                             | Homo sapiens |
| 5450      | POU class 2 associating factor 1                                                                                                                                                                      | Homo sapiens |
| 55195     | chromosome 14 open reading frame 105                                                                                                                                                                  | Homo sapiens |
| 2907      | glutamate receptor, ionotropic, N-methyl D-aspartate-associated protein 1 (glutamate binding)                                                                                                         | Homo sapiens |
| 2785      | guanine nucleotide binding protein (G protein), gamma 3                                                                                                                                               | Homo sapiens |
| 10279     | protease, serine, 16 (thymus)                                                                                                                                                                         | Homo sapiens |
| 79065     | ATG9 autophagy related 9 homolog A ( <i>S. cerevisiae</i> )                                                                                                                                           | Homo sapiens |
| 51000     | solute carrier family 35, member B3                                                                                                                                                                   | Homo sapiens |
| 64841     | glucosamine-phosphate N-acetyltransferase 1                                                                                                                                                           | Homo sapiens |
| 55218     | exonuclease 3'-5' domain containing 2                                                                                                                                                                 | Homo sapiens |
| 9945      | glutamine-fructose-6-phosphate transaminase 2                                                                                                                                                         | Homo sapiens |
| 100133760 | similar to Jumonji, AT rich interactive domain 1B (RBP2-like); lysine (K)-specific demethylase 5B                                                                                                     | Homo sapiens |
| 10765     | similar to Jumonji, AT rich interactive domain 1B (RBP2-like); lysine (K)-specific demethylase 5B                                                                                                     | Homo sapiens |
| 55793     | family with sequence similarity 63, member A                                                                                                                                                          | Homo sapiens |
| 653882    | similar to Mast/stem cell growth factor receptor precursor (SCFR) (Proto-oncogene tyrosine-protein kinase Kit) (c-kit) (CD117 antigen); v-kit Hardy-Zuckerman 4 feline sarcoma viral oncogene homolog | Homo sapiens |
| 652799    | similar to Mast/stem cell growth factor receptor precursor (SCFR) (Proto-oncogene tyrosine-protein kinase Kit) (c-kit) (CD117 antigen); v-kit Hardy-Zuckerman 4 feline sarcoma viral oncogene homolog | Homo sapiens |
| 3815      | similar to Mast/stem cell growth factor receptor precursor (SCFR) (Proto-oncogene tyrosine-protein kinase Kit) (c-kit) (CD117 antigen); v-kit Hardy-Zuckerman 4 feline sarcoma viral oncogene homolog | Homo sapiens |
| 9690      | ubiquitin protein ligase E3C                                                                                                                                                                          | Homo sapiens |
| 8193      | D4, zinc and double PHD fingers family 1                                                                                                                                                              | Homo sapiens |
| 1499      | catenin (cadherin-associated protein), beta 1, 88kDa                                                                                                                                                  | Homo sapiens |
| 5335      | phospholipase C, gamma 1                                                                                                                                                                              | Homo sapiens |
| 5216      | profilin 1                                                                                                                                                                                            | Homo sapiens |
| 81602     | cytidine and dCMP deaminase domain containing 1                                                                                                                                                       | Homo sapiens |
| 10294     | DnaJ (Hsp40) homolog, subfamily A, member 2                                                                                                                                                           | Homo sapiens |
| 58528     | Ras-related GTP binding D                                                                                                                                                                             | Homo sapiens |
| 7127      | tumor necrosis factor, alpha-induced protein 2                                                                                                                                                        | Homo sapiens |
| 3995      | fatty acid desaturase 3                                                                                                                                                                               | Homo sapiens |
| 138199    | chromosome 9 open reading frame 41                                                                                                                                                                    | Homo sapiens |
| 149371    | exocyst complex component 8                                                                                                                                                                           | Homo sapiens |
| 3090      | hypermethylated in cancer 1                                                                                                                                                                           | Homo sapiens |
| 8675      | syntaxin 16                                                                                                                                                                                           | Homo sapiens |
| 5932      | retinoblastoma binding protein 8                                                                                                                                                                      | Homo sapiens |
| 64857     | pleckstrin homology domain containing, family G (with RhoGef domain) member 2                                                                                                                         | Homo sapiens |
| 10042     | HMG box domain containing 4                                                                                                                                                                           | Homo sapiens |
| 9793      | cytoskeleton associated protein 5                                                                                                                                                                     | Homo sapiens |
| 3280      | hairy and enhancer of split 1, ( <i>Drosophila</i> )                                                                                                                                                  | Homo sapiens |
| 129446    | xin actin-binding repeat containing 2                                                                                                                                                                 | Homo sapiens |
| 285527    | FRY-like                                                                                                                                                                                              | Homo sapiens |
| 4208      | myocyte enhancer factor 2C                                                                                                                                                                            | Homo sapiens |
| 1746      | distal-less homeobox 2                                                                                                                                                                                | Homo sapiens |
| 2017      | cortactin                                                                                                                                                                                             | Homo sapiens |
| 4967      | oxoglutarate (alpha-ketoglutarate) dehydrogenase (lipoamide)                                                                                                                                          | Homo sapiens |
| 5454      | POU class 3 homeobox 2                                                                                                                                                                                | Homo sapiens |
| 79717     | phosphopantothenoylcysteine synthetase                                                                                                                                                                | Homo sapiens |
| 55284     | ubiquitin-conjugating enzyme E2W (putative)                                                                                                                                                           | Homo sapiens |
| 9653      | heparan sulfate 2-O-sulfotransferase 1                                                                                                                                                                | Homo sapiens |
| 10051     | structural maintenance of chromosomes 4                                                                                                                                                               | Homo sapiens |
| 10890     | RAB10, member RAS oncogene family                                                                                                                                                                     | Homo sapiens |
| 84947     | serine active site containing 1                                                                                                                                                                       | Homo sapiens |
| 10085     | EGF-like repeats and discoidin I-like domains 3                                                                                                                                                       | Homo sapiens |
| 522       | ATP synthase, H <sup>+</sup> transporting, mitochondrial F0 complex, subunit F6                                                                                                                       | Homo sapiens |
| 7280      | tubulin, beta 2A                                                                                                                                                                                      | Homo sapiens |
| 10490     | vesicle transport through interaction with t-SNAREs homolog 1B (yeast)                                                                                                                                | Homo sapiens |
| 9319      | thyroid hormone receptor interactor 13                                                                                                                                                                | Homo sapiens |
| 9330      | general transcription factor IIIC, polypeptide 3, 102kDa                                                                                                                                              | Homo sapiens |
| 7249      | tuberous sclerosis 2                                                                                                                                                                                  | Homo sapiens |
| 392437    | similar to ferritin, light polypeptide; ferritin, light polypeptide                                                                                                                                   | Homo sapiens |
| 2512      | similar to ferritin, light polypeptide; ferritin, light polypeptide                                                                                                                                   | Homo sapiens |
| 2068      | excision repair cross-complementing rodent repair deficiency, complementation group 2                                                                                                                 | Homo sapiens |
| 55722     | centrosomal protein 72kDa                                                                                                                                                                             | Homo sapiens |
| 22835     | zinc finger protein 30 homolog (mouse)                                                                                                                                                                | Homo sapiens |
| 1993      | ELAV (embryonic lethal, abnormal vision, <i>Drosophila</i> )-like 2 (Hu antigen B)                                                                                                                    | Homo sapiens |
| 55970     | guanine nucleotide binding protein (G protein), gamma 12                                                                                                                                              | Homo sapiens |
| 2152      | coagulation factor III (thromboplastin, tissue factor)                                                                                                                                                | Homo sapiens |
| 118987    | PDZ domain containing 8                                                                                                                                                                               | Homo sapiens |



|           |                                                                                                     |              |
|-----------|-----------------------------------------------------------------------------------------------------|--------------|
| 11100     | heterogeneous nuclear ribonucleoprotein U-like 1                                                    | Homo sapiens |
| 7265      | tetratricopeptide repeat domain 1                                                                   | Homo sapiens |
| 23557     | SNAP-associated protein                                                                             | Homo sapiens |
| 1435      | colony stimulating factor 1 (macrophage)                                                            | Homo sapiens |
| 54726     | OTU domain containing 4                                                                             | Homo sapiens |
| 5321      | phospholipase A2, group IVA (cytosolic, calcium-dependent)                                          | Homo sapiens |
| 26156     | ribosomal L1 domain containing 1                                                                    | Homo sapiens |
| 79658     | Rho GTPase activating protein 10                                                                    | Homo sapiens |
| 51520     | leucyl-tRNA synthetase                                                                              | Homo sapiens |
| 9189      | zinc finger, BED-type containing 1                                                                  | Homo sapiens |
| 85476     | G elongation factor, mitochondrial 1                                                                | Homo sapiens |
| 5727      | patched homolog 1 (Drosophila)                                                                      | Homo sapiens |
| 84909     | chromosome 9 open reading frame 3                                                                   | Homo sapiens |
| 112937    | galactosidase, beta 1-like 3                                                                        | Homo sapiens |
| 342615    | schlafen family member 12-like                                                                      | Homo sapiens |
| 23409     | sirtuin (silent mating type information regulation 2 homolog) 4 (S. cerevisiae)                     | Homo sapiens |
| 64324     | nuclear receptor binding SET domain protein 1                                                       | Homo sapiens |
| 2932      | glycogen synthase kinase 3 beta                                                                     | Homo sapiens |
| 23597     | acyl-CoA thioesterase 9                                                                             | Homo sapiens |
| 140801    | ribosomal protein L10-like                                                                          | Homo sapiens |
| 1278      | collagen, type I, alpha 2                                                                           | Homo sapiens |
| 80228     | ORAI calcium release-activated calcium modulator 2                                                  | Homo sapiens |
| 349075    | zinc finger protein 713                                                                             | Homo sapiens |
| 2873      | G protein pathway suppressor 1                                                                      | Homo sapiens |
| 5076      | paired box 2                                                                                        | Homo sapiens |
| 6924      | transcription elongation factor B (SIII), polypeptide 3 (110kDa, elongin A)                         | Homo sapiens |
| 10370     | Cbp/p300-interacting transactivator, with Glu/Asp-rich carboxy-terminal domain, 2                   | Homo sapiens |
| 64802     | nicotinamide nucleotide adenyltransferase 1                                                         | Homo sapiens |
| 5453      | POU class 3 homeobox 1                                                                              | Homo sapiens |
| 351       | amyloid beta (A4) precursor protein                                                                 | Homo sapiens |
| 27443     | cat eye syndrome chromosome region, candidate 2                                                     | Homo sapiens |
| 100130633 | hypothetical LOC100130633; zinc finger, MYM-type 6                                                  | Homo sapiens |
| 9204      | hypothetical LOC100130633; zinc finger, MYM-type 6                                                  | Homo sapiens |
| 57380     | MRS2 magnesium homeostasis factor homolog (S. cerevisiae)                                           | Homo sapiens |
| 10548     | transmembrane 9 superfamily member 1                                                                | Homo sapiens |
| 9962      | solute carrier family 23 (nucleobase transporters), member 2                                        | Homo sapiens |
| 3925      | stathmin 1                                                                                          | Homo sapiens |
| 81831     | neuropilin (NRP) and tolloid (TLL)-like 2                                                           | Homo sapiens |
| 123263    | mitochondrial methionyl-tRNA formyltransferase                                                      | Homo sapiens |
| 57460     | protein phosphatase 1H (PP2C domain containing)                                                     | Homo sapiens |
| 6045      | ring finger protein 2                                                                               | Homo sapiens |
| 6597      | SWI/SNF related, matrix associated, actin dependent regulator of chromatin, subfamily a, member 4   | Homo sapiens |
| 84868     | hepatitis A virus cellular receptor 2                                                               | Homo sapiens |
| 55643     | BTB (POZ) domain containing 2                                                                       | Homo sapiens |
| 399511    | transcription elongation factor A (SII), 1 pseudogene 2; transcription elongation factor A (SII), 1 | Homo sapiens |
| 6917      | transcription elongation factor A (SII), 1 pseudogene 2; transcription elongation factor A (SII), 1 | Homo sapiens |
| 27164     | sal-like 3 (Drosophila)                                                                             | Homo sapiens |
| 9802      | DAZ associated protein 2                                                                            | Homo sapiens |
| 1738      | dihydroliipoamide dehydrogenase                                                                     | Homo sapiens |
| 4800      | nuclear transcription factor Y, alpha                                                               | Homo sapiens |
| 9839      | zinc finger E-box binding homeobox 2                                                                | Homo sapiens |
| 84312     | breast cancer metastasis-suppressor 1-like                                                          | Homo sapiens |
| 1003      | cadherin 5, type 2 (vascular endothelium)                                                           | Homo sapiens |
| 6683      | spastin                                                                                             | Homo sapiens |
| 121391    | keratin 74                                                                                          | Homo sapiens |
| 1477      | cleavage stimulation factor, 3' pre-RNA, subunit 1, 50kDa                                           | Homo sapiens |
| 1267      | 2',3'-cyclic nucleotide 3' phosphodiesterase                                                        | Homo sapiens |
| 56288     | par-3 partitioning defective 3 homolog (C. elegans)                                                 | Homo sapiens |
| 23389     | mediator complex subunit 13-like                                                                    | Homo sapiens |
| 3912      | laminin, beta 1                                                                                     | Homo sapiens |
| 54955     | chromosome 1 open reading frame 109                                                                 | Homo sapiens |
| 286148    | dpy-19-like 4 (C. elegans)                                                                          | Homo sapiens |
| 10497     | unc-13 homolog B (C. elegans)                                                                       | Homo sapiens |
| 5411      | pinin, desmosome associated protein                                                                 | Homo sapiens |
| 5708      | proteasome (prosome, macropain) 26S subunit, non-ATPase, 2                                          | Homo sapiens |
| 6775098   | NADH-ubiquinone oxidoreductase chain 1                                                              | Homo sapiens |
| 4535      | NADH-ubiquinone oxidoreductase chain 1                                                              | Homo sapiens |
| 92999     | zinc finger and BTB domain containing 47                                                            | Homo sapiens |
| 4144      | methionine adenosyltransferase II, alpha                                                            | Homo sapiens |
| 27158     | NADPH dependent diflavin oxidoreductase 1                                                           | Homo sapiens |
| 81550     | tudor domain containing 3                                                                           | Homo sapiens |
| 54879     | suppression of tumorigenicity 7 like                                                                | Homo sapiens |
| 90120     | chromosome 9 open reading frame 69                                                                  | Homo sapiens |
| 55250     | elongation protein 2 homolog (S. cerevisiae)                                                        | Homo sapiens |
| 8518      | inhibitor of kappa light polypeptide gene enhancer in B-cells, kinase complex-associated protein    | Homo sapiens |

|           |                                                                                                             |              |
|-----------|-------------------------------------------------------------------------------------------------------------|--------------|
| 51809     | UDP-N-acetyl-alpha-D-galactosamine:polypeptide N-acetylgalactosaminyltransferase 7 (GalNAc-T7)              | Homo sapiens |
| 57169     | zinc finger, NFX1-type containing 1                                                                         | Homo sapiens |
| 51335     | neugrin, neurite outgrowth associated                                                                       | Homo sapiens |
| 6605      | SWI/SNF related, matrix associated, actin dependent regulator of chromatin, subfamily e, member 1           | Homo sapiens |
| 2006      | elastin                                                                                                     | Homo sapiens |
| 286       | ankyrin 1, erythrocytic                                                                                     | Homo sapiens |
| 5910      | RAP1, GTP-GDP dissociation stimulator 1                                                                     | Homo sapiens |
| 57552     | arylacetamide deacetylase-like 1                                                                            | Homo sapiens |
| 9443      | mediator complex subunit 7                                                                                  | Homo sapiens |
| 57469     | PNMA-like 2                                                                                                 | Homo sapiens |
| 5576      | protein kinase, cAMP-dependent, regulatory, type II, alpha                                                  | Homo sapiens |
| 3083      | HGF activator                                                                                               | Homo sapiens |
| 3069      | high density lipoprotein binding protein                                                                    | Homo sapiens |
| 54943     | DnaJ (Hsp40) homolog, subfamily C, member 28                                                                | Homo sapiens |
| 991       | cell division cycle 20 homolog ( <i>S. cerevisiae</i> )                                                     | Homo sapiens |
| 1051      | CCAAT/enhancer binding protein (C/EBP), beta                                                                | Homo sapiens |
| 5074      | PRKC, apoptosis, WTI, regulator                                                                             | Homo sapiens |
| 10771     | zinc finger, MYND domain containing 11                                                                      | Homo sapiens |
| 9491      | proteasome (prosome, macropain) inhibitor subunit 1 (PI31)                                                  | Homo sapiens |
| 8672      | eukaryotic translation initiation factor 4 gamma, 3                                                         | Homo sapiens |
| 51021     | mitochondrial ribosomal protein S16                                                                         | Homo sapiens |
| 10276     | neuroepithelial cell transforming 1                                                                         | Homo sapiens |
| 23429     | RING1 and YY1 binding protein                                                                               | Homo sapiens |
| 1778      | dynein, cytoplasmic 1, heavy chain 1                                                                        | Homo sapiens |
| 996       | cell division cycle 27 homolog ( <i>S. cerevisiae</i> )                                                     | Homo sapiens |
| 51647     | family with sequence similarity 96, member B                                                                | Homo sapiens |
| 10059     | dynamitin 1-like                                                                                            | Homo sapiens |
| 169714    | quiescin Q6 sulfhydryl oxidase 2                                                                            | Homo sapiens |
| 9213      | xenotropic and polytropic retrovirus receptor                                                               | Homo sapiens |
| 441531    | phosphoglycerate mutase family member 4                                                                     | Homo sapiens |
| 57708     | mesoderm induction early response 1 homolog ( <i>Xenopus laevis</i> )                                       | Homo sapiens |
| 1938      | eukaryotic translation elongation factor 2                                                                  | Homo sapiens |
| 81790     | ring finger protein 170                                                                                     | Homo sapiens |
| 2591      | UDP-N-acetyl-alpha-D-galactosamine:polypeptide N-acetylgalactosaminyltransferase 3 (GalNAc-T3)              | Homo sapiens |
| 54797     | mediator complex subunit 18                                                                                 | Homo sapiens |
| 23102     | TBC1 domain family, member 2B                                                                               | Homo sapiens |
| 56919     | DEAH (Asp-Glu-Ala-His) box polypeptide 33                                                                   | Homo sapiens |
| 6541      | solute carrier family 7 (cationic amino acid transporter, y+ system), member 1                              | Homo sapiens |
| 8643      | patched homolog 2 ( <i>Drosophila</i> )                                                                     | Homo sapiens |
| 79269     | WD repeat domain 32                                                                                         | Homo sapiens |
| 92        | activin A receptor, type IIA                                                                                | Homo sapiens |
| 10316     | neuromedin U receptor 1                                                                                     | Homo sapiens |
| 4012      | leucyl/cystinyl aminopeptidase                                                                              | Homo sapiens |
| 5352      | procollagen-lysine, 2-oxoglutarate 5-dioxygenase 2                                                          | Homo sapiens |
| 3609      | interleukin enhancer binding factor 3, 90kDa                                                                | Homo sapiens |
| 51665     | ankyrin repeat and SOCS box-containing 1                                                                    | Homo sapiens |
| 84641     | hippocampus abundant transcript-like 1                                                                      | Homo sapiens |
| 57606     | SLAIN motif family, member 2                                                                                | Homo sapiens |
| 79134     | transmembrane protein 185B (pseudogene)                                                                     | Homo sapiens |
| 5208      | 6-phosphofructo-2-kinase/fructose-2,6-biphosphatase 2                                                       | Homo sapiens |
| 55740     | enabled homolog ( <i>Drosophila</i> )                                                                       | Homo sapiens |
| 54989     | zinc finger protein 770                                                                                     | Homo sapiens |
| 8625      | regulatory factor X-associated ankyrin-containing protein                                                   | Homo sapiens |
| 51588     | protein inhibitor of activated STAT, 4                                                                      | Homo sapiens |
| 26207     | phosphatidylinositol transfer protein, cytoplasmic 1                                                        | Homo sapiens |
| 342667    | SH3 and cysteine rich domain 2                                                                              | Homo sapiens |
| 258010    | small VCP/p97-interacting protein                                                                           | Homo sapiens |
| 26504     | cyclin M4                                                                                                   | Homo sapiens |
| 5144      | phosphodiesterase 4D, cAMP-specific (phosphodiesterase E3 dunce homolog, <i>Drosophila</i> )                | Homo sapiens |
| 9100      | ubiquitin specific peptidase 10                                                                             | Homo sapiens |
| 55669     | mitofusin 1                                                                                                 | Homo sapiens |
| 81611     | acidic (leucine-rich) nuclear phosphoprotein 32 family, member E                                            | Homo sapiens |
| 8202      | nuclear receptor coactivator 3                                                                              | Homo sapiens |
| 389151    | UPF0572 protein ENSP00000372650; hypothetical protein LOC389151                                             | Homo sapiens |
| 729627    | UPF0572 protein ENSP00000372650; hypothetical protein LOC389151                                             | Homo sapiens |
| 7072      | TIA1 cytotoxic granule-associated RNA binding protein                                                       | Homo sapiens |
| 79691     | queuine tRNA-ribosyltransferase domain containing 1                                                         | Homo sapiens |
| 85440     | dedicator of cytokinesis 7                                                                                  | Homo sapiens |
| 5870      | RAB6C, member RAS oncogene family; RAB6A, member RAS oncogene family; hypothetical LOC100130819; RAB6C-like | Homo sapiens |
| 84084     | RAB6C, member RAS oncogene family; RAB6A, member RAS oncogene family; hypothetical LOC100130819; RAB6C-like | Homo sapiens |
| 150786    | RAB6C, member RAS oncogene family; RAB6A, member RAS oncogene family; hypothetical LOC100130819; RAB6C-like | Homo sapiens |
| 100130819 | RAB6C, member RAS oncogene family; RAB6A, member RAS oncogene family; hypothetical LOC100130819; RAB6C-like | Homo sapiens |







|           |                                                                                                                                                                                                                                                                                                                                                                                                                                                                                                                                                                                                                                                                                                                                                                                                                                                                                                                 |              |
|-----------|-----------------------------------------------------------------------------------------------------------------------------------------------------------------------------------------------------------------------------------------------------------------------------------------------------------------------------------------------------------------------------------------------------------------------------------------------------------------------------------------------------------------------------------------------------------------------------------------------------------------------------------------------------------------------------------------------------------------------------------------------------------------------------------------------------------------------------------------------------------------------------------------------------------------|--------------|
| 388532    | ribosomal protein L21 pseudogene 134; ribosomal protein L21 pseudogene 80; ribosomal protein L21 pseudogene 20; ribosomal protein L21 pseudogene 46; ribosomal protein L21 pseudogene 45; ribosomal protein L21 pseudogene 131; ribosomal protein L21 pseudogene 16; ribosomal protein L21 pseudogene 53; ribosomal protein L21 pseudogene 120; ribosomal protein L21 pseudogene 37; ribosomal protein L21 pseudogene 93; ribosomal protein L21 pseudogene 39; ribosomal protein L21 pseudogene 29; ribosomal protein L21 pseudogene 28; ribosomal protein L21 pseudogene 14; ribosomal protein L21 pseudogene 98; ribosomal protein L21 pseudogene 105; ribosomal protein L21 pseudogene 87; ribosomal protein L21 pseudogene 128; ribosomal protein L21 pseudogene 69; ribosomal protein L21 pseudogene 97; ribosomal protein L21; ribosomal protein L21 pseudogene 119; ribosomal protein L21 pseudogene 125 | Homo sapiens |
| 100131672 | ribosomal protein L21 pseudogene 134; ribosomal protein L21 pseudogene 80; ribosomal protein L21 pseudogene 20; ribosomal protein L21 pseudogene 46; ribosomal protein L21 pseudogene 45; ribosomal protein L21 pseudogene 131; ribosomal protein L21 pseudogene 16; ribosomal protein L21 pseudogene 53; ribosomal protein L21 pseudogene 120; ribosomal protein L21 pseudogene 37; ribosomal protein L21 pseudogene 93; ribosomal protein L21 pseudogene 39; ribosomal protein L21 pseudogene 29; ribosomal protein L21 pseudogene 28; ribosomal protein L21 pseudogene 14; ribosomal protein L21 pseudogene 98; ribosomal protein L21 pseudogene 105; ribosomal protein L21 pseudogene 87; ribosomal protein L21 pseudogene 128; ribosomal protein L21 pseudogene 69; ribosomal protein L21 pseudogene 97; ribosomal protein L21; ribosomal protein L21 pseudogene 119; ribosomal protein L21 pseudogene 125 | Homo sapiens |
| 100133273 | ribosomal protein L21 pseudogene 134; ribosomal protein L21 pseudogene 80; ribosomal protein L21 pseudogene 20; ribosomal protein L21 pseudogene 46; ribosomal protein L21 pseudogene 45; ribosomal protein L21 pseudogene 131; ribosomal protein L21 pseudogene 16; ribosomal protein L21 pseudogene 53; ribosomal protein L21 pseudogene 120; ribosomal protein L21 pseudogene 37; ribosomal protein L21 pseudogene 93; ribosomal protein L21 pseudogene 39; ribosomal protein L21 pseudogene 29; ribosomal protein L21 pseudogene 28; ribosomal protein L21 pseudogene 14; ribosomal protein L21 pseudogene 98; ribosomal protein L21 pseudogene 105; ribosomal protein L21 pseudogene 87; ribosomal protein L21 pseudogene 128; ribosomal protein L21 pseudogene 69; ribosomal protein L21 pseudogene 97; ribosomal protein L21; ribosomal protein L21 pseudogene 119; ribosomal protein L21 pseudogene 125 | Homo sapiens |
| 100131205 | ribosomal protein L21 pseudogene 134; ribosomal protein L21 pseudogene 80; ribosomal protein L21 pseudogene 20; ribosomal protein L21 pseudogene 46; ribosomal protein L21 pseudogene 45; ribosomal protein L21 pseudogene 131; ribosomal protein L21 pseudogene 16; ribosomal protein L21 pseudogene 53; ribosomal protein L21 pseudogene 120; ribosomal protein L21 pseudogene 37; ribosomal protein L21 pseudogene 93; ribosomal protein L21 pseudogene 39; ribosomal protein L21 pseudogene 29; ribosomal protein L21 pseudogene 28; ribosomal protein L21 pseudogene 14; ribosomal protein L21 pseudogene 98; ribosomal protein L21 pseudogene 105; ribosomal protein L21 pseudogene 87; ribosomal protein L21 pseudogene 128; ribosomal protein L21 pseudogene 69; ribosomal protein L21 pseudogene 97; ribosomal protein L21; ribosomal protein L21 pseudogene 119; ribosomal protein L21 pseudogene 125 | Homo sapiens |
| 80255     | solute carrier family 35, member F5                                                                                                                                                                                                                                                                                                                                                                                                                                                                                                                                                                                                                                                                                                                                                                                                                                                                             | Homo sapiens |
| 84725     | pleckstrin homology domain containing, family A (phosphoinositide binding specific) member 8                                                                                                                                                                                                                                                                                                                                                                                                                                                                                                                                                                                                                                                                                                                                                                                                                    | Homo sapiens |
| 113251    | La ribonucleoprotein domain family, member 4                                                                                                                                                                                                                                                                                                                                                                                                                                                                                                                                                                                                                                                                                                                                                                                                                                                                    | Homo sapiens |
| 2911      | glutamate receptor, metabotropic 1                                                                                                                                                                                                                                                                                                                                                                                                                                                                                                                                                                                                                                                                                                                                                                                                                                                                              | Homo sapiens |
| 377677    | carbonic anhydrase XIII                                                                                                                                                                                                                                                                                                                                                                                                                                                                                                                                                                                                                                                                                                                                                                                                                                                                                         | Homo sapiens |
| 117285    | defensin, beta 118                                                                                                                                                                                                                                                                                                                                                                                                                                                                                                                                                                                                                                                                                                                                                                                                                                                                                              | Homo sapiens |
| 23170     | tubulin tyrosine ligase-like family, member 12                                                                                                                                                                                                                                                                                                                                                                                                                                                                                                                                                                                                                                                                                                                                                                                                                                                                  | Homo sapiens |
| 54058     | chromosome 21 open reading frame 58                                                                                                                                                                                                                                                                                                                                                                                                                                                                                                                                                                                                                                                                                                                                                                                                                                                                             | Homo sapiens |
| 7678      | zinc finger protein 124                                                                                                                                                                                                                                                                                                                                                                                                                                                                                                                                                                                                                                                                                                                                                                                                                                                                                         | Homo sapiens |
| 195828    | zinc finger protein 367                                                                                                                                                                                                                                                                                                                                                                                                                                                                                                                                                                                                                                                                                                                                                                                                                                                                                         | Homo sapiens |
| 79745     | CAP-GLY domain containing linker protein family, member 4                                                                                                                                                                                                                                                                                                                                                                                                                                                                                                                                                                                                                                                                                                                                                                                                                                                       | Homo sapiens |
| 26094     | WD repeat domain 21A                                                                                                                                                                                                                                                                                                                                                                                                                                                                                                                                                                                                                                                                                                                                                                                                                                                                                            | Homo sapiens |
| 5521      | protein phosphatase 2 (formerly 2A), regulatory subunit B, beta isoform                                                                                                                                                                                                                                                                                                                                                                                                                                                                                                                                                                                                                                                                                                                                                                                                                                         | Homo sapiens |
| 29775     | caspase recruitment domain family, member 10                                                                                                                                                                                                                                                                                                                                                                                                                                                                                                                                                                                                                                                                                                                                                                                                                                                                    | Homo sapiens |
| 51643     | transmembrane BAX inhibitor motif containing 4                                                                                                                                                                                                                                                                                                                                                                                                                                                                                                                                                                                                                                                                                                                                                                                                                                                                  | Homo sapiens |
| 90268     | family with sequence similarity 105, member B                                                                                                                                                                                                                                                                                                                                                                                                                                                                                                                                                                                                                                                                                                                                                                                                                                                                   | Homo sapiens |
| 57474     | zinc finger protein 490                                                                                                                                                                                                                                                                                                                                                                                                                                                                                                                                                                                                                                                                                                                                                                                                                                                                                         | Homo sapiens |
| 11069     | Rap guanine nucleotide exchange factor (GEF) 4                                                                                                                                                                                                                                                                                                                                                                                                                                                                                                                                                                                                                                                                                                                                                                                                                                                                  | Homo sapiens |
| 8348      | histone cluster 1, H2bo                                                                                                                                                                                                                                                                                                                                                                                                                                                                                                                                                                                                                                                                                                                                                                                                                                                                                         | Homo sapiens |
| 94039     | zinc finger protein 101                                                                                                                                                                                                                                                                                                                                                                                                                                                                                                                                                                                                                                                                                                                                                                                                                                                                                         | Homo sapiens |
| 135250    | retinoic acid early transcript 1E                                                                                                                                                                                                                                                                                                                                                                                                                                                                                                                                                                                                                                                                                                                                                                                                                                                                               | Homo sapiens |
| 6449      | small glutamine-rich tetratricopeptide repeat (TPR)-containing, alpha                                                                                                                                                                                                                                                                                                                                                                                                                                                                                                                                                                                                                                                                                                                                                                                                                                           | Homo sapiens |
| 9810      | ring finger protein 40                                                                                                                                                                                                                                                                                                                                                                                                                                                                                                                                                                                                                                                                                                                                                                                                                                                                                          | Homo sapiens |
| 9126      | structural maintenance of chromosomes 3                                                                                                                                                                                                                                                                                                                                                                                                                                                                                                                                                                                                                                                                                                                                                                                                                                                                         | Homo sapiens |
| 81490     | phosphatidylserine synthase 2                                                                                                                                                                                                                                                                                                                                                                                                                                                                                                                                                                                                                                                                                                                                                                                                                                                                                   | Homo sapiens |
| 91442     | chromosome 19 open reading frame 40                                                                                                                                                                                                                                                                                                                                                                                                                                                                                                                                                                                                                                                                                                                                                                                                                                                                             | Homo sapiens |
| 2926      | G-rich RNA sequence binding factor 1                                                                                                                                                                                                                                                                                                                                                                                                                                                                                                                                                                                                                                                                                                                                                                                                                                                                            | Homo sapiens |
| 9110      | myotubularin related protein 4                                                                                                                                                                                                                                                                                                                                                                                                                                                                                                                                                                                                                                                                                                                                                                                                                                                                                  | Homo sapiens |
| 8816      | WD repeat domain 22                                                                                                                                                                                                                                                                                                                                                                                                                                                                                                                                                                                                                                                                                                                                                                                                                                                                                             | Homo sapiens |
| 9926      | lysophosphatidylglycerol acyltransferase 1                                                                                                                                                                                                                                                                                                                                                                                                                                                                                                                                                                                                                                                                                                                                                                                                                                                                      | Homo sapiens |
| 9730      | Vpr (HIV-1) binding protein                                                                                                                                                                                                                                                                                                                                                                                                                                                                                                                                                                                                                                                                                                                                                                                                                                                                                     | Homo sapiens |
| 201292    | tripartite motif-containing 65                                                                                                                                                                                                                                                                                                                                                                                                                                                                                                                                                                                                                                                                                                                                                                                                                                                                                  | Homo sapiens |
| 140564    | apolipoprotein B mRNA editing enzyme, catalytic polypeptide-like 3D                                                                                                                                                                                                                                                                                                                                                                                                                                                                                                                                                                                                                                                                                                                                                                                                                                             | Homo sapiens |
| 7553      | zinc finger protein 7                                                                                                                                                                                                                                                                                                                                                                                                                                                                                                                                                                                                                                                                                                                                                                                                                                                                                           | Homo sapiens |

|           |                                                                                                                                                                                                                                                                            |              |
|-----------|----------------------------------------------------------------------------------------------------------------------------------------------------------------------------------------------------------------------------------------------------------------------------|--------------|
| 646817    | SET nuclear oncogene; similar to SET translocation                                                                                                                                                                                                                         | Homo sapiens |
| 6418      | SET nuclear oncogene; similar to SET translocation                                                                                                                                                                                                                         | Homo sapiens |
| 22990     | pecanex homolog (Drosophila)                                                                                                                                                                                                                                               | Homo sapiens |
| 29109     | formin homology 2 domain containing 1                                                                                                                                                                                                                                      | Homo sapiens |
| 90580     | chromosome 19 open reading frame 52                                                                                                                                                                                                                                        | Homo sapiens |
| 813       | calumenin                                                                                                                                                                                                                                                                  | Homo sapiens |
| 54982     | ceroid-lipofuscinosis, neuronal 6, late infantile, variant                                                                                                                                                                                                                 | Homo sapiens |
| 9091      | phosphatidylinositol glycan anchor biosynthesis, class Q                                                                                                                                                                                                                   | Homo sapiens |
| 363       | aquaporin 6, kidney specific                                                                                                                                                                                                                                               | Homo sapiens |
| 2117      | ets variant 3                                                                                                                                                                                                                                                              | Homo sapiens |
| 140468    | COX11 homolog, cytochrome c oxidase assembly protein (yeast) pseudogene                                                                                                                                                                                                    | Homo sapiens |
| 84948     | tigger transposable element derived 5                                                                                                                                                                                                                                      | Homo sapiens |
| 51072     | mediator of cell motility 1; similar to mediator of cell motility 1                                                                                                                                                                                                        | Homo sapiens |
| 645175    | mediator of cell motility 1; similar to mediator of cell motility 1                                                                                                                                                                                                        | Homo sapiens |
| 4891      | solute carrier family 11 (proton-coupled divalent metal ion transporters), member 2                                                                                                                                                                                        | Homo sapiens |
| 8932      | methyl-CpG binding domain protein 2                                                                                                                                                                                                                                        | Homo sapiens |
| 25794     | fascin homolog 2, actin-bundling protein, retinal (Strongylocentrotus purpuratus)                                                                                                                                                                                          | Homo sapiens |
| 83549     | uridine-cytidine kinase 1                                                                                                                                                                                                                                                  | Homo sapiens |
| 91612     | churchill domain containing 1                                                                                                                                                                                                                                              | Homo sapiens |
| 57326     | pre-B-cell leukemia homeobox interacting protein 1                                                                                                                                                                                                                         | Homo sapiens |
| 58496     | lymphocyte antigen 6 complex, locus G5B; casein kinase 2, beta polypeptide                                                                                                                                                                                                 | Homo sapiens |
| 1460      | lymphocyte antigen 6 complex, locus G5B; casein kinase 2, beta polypeptide                                                                                                                                                                                                 | Homo sapiens |
| 7161      | tumor protein p73                                                                                                                                                                                                                                                          | Homo sapiens |
| 54475     | notchless homolog 1 (Drosophila)                                                                                                                                                                                                                                           | Homo sapiens |
| 90139     | tetraspanin 18                                                                                                                                                                                                                                                             | Homo sapiens |
| 4605      | v-myb myeloblastosis viral oncogene homolog (avian)-like 2                                                                                                                                                                                                                 | Homo sapiens |
| 3835      | kinesin family member 22                                                                                                                                                                                                                                                   | Homo sapiens |
| 113878    | deltex homolog 2 (Drosophila)                                                                                                                                                                                                                                              | Homo sapiens |
| 3800      | kinesin family member 5C                                                                                                                                                                                                                                                   | Homo sapiens |
| 83876     | maestro                                                                                                                                                                                                                                                                    | Homo sapiens |
| 7322      | ubiquitin-conjugating enzyme E2D 2 (UBC4/5 homolog, yeast)                                                                                                                                                                                                                 | Homo sapiens |
| 643853    | transmembrane protein with metallophosphoesterase domain                                                                                                                                                                                                                   | Homo sapiens |
| 284541    | cytochrome P450, family 4, subfamily A, polypeptide 22                                                                                                                                                                                                                     | Homo sapiens |
| 10376     | hypothetical gene supported by AF081484; NM_006082; tubulin, alpha 1b                                                                                                                                                                                                      | Homo sapiens |
| 399942    | hypothetical gene supported by AF081484; NM_006082; tubulin, alpha 1b                                                                                                                                                                                                      | Homo sapiens |
| 5046      | proprotein convertase subtilisin/kexin type 6                                                                                                                                                                                                                              | Homo sapiens |
| 144165    | prickle homolog 1 (Drosophila)                                                                                                                                                                                                                                             | Homo sapiens |
| 10360     | nucleophosmin/nucleoplasmin, 3                                                                                                                                                                                                                                             | Homo sapiens |
| 7422      | vascular endothelial growth factor A                                                                                                                                                                                                                                       | Homo sapiens |
| 27240     | signaling threshold regulating transmembrane adaptor 1                                                                                                                                                                                                                     | Homo sapiens |
| 1063      | centromere protein F, 350/400ka (mitosin)                                                                                                                                                                                                                                  | Homo sapiens |
| 5832      | aldehyde dehydrogenase 18 family, member A1                                                                                                                                                                                                                                | Homo sapiens |
| 93        | activin A receptor, type IIB                                                                                                                                                                                                                                               | Homo sapiens |
| 9532      | BCL2-associated athanogene 2                                                                                                                                                                                                                                               | Homo sapiens |
| 84132     | ubiquitin specific peptidase 42                                                                                                                                                                                                                                            | Homo sapiens |
| 160897    | G protein-coupled receptor 180                                                                                                                                                                                                                                             | Homo sapiens |
| 4241      | antigen p97 (melanoma associated) identified by monoclonal antibodies 133.2 and 96.5                                                                                                                                                                                       | Homo sapiens |
| 27130     | inversin                                                                                                                                                                                                                                                                   | Homo sapiens |
| 79174     | cysteine-rich with EGF-like domains 2                                                                                                                                                                                                                                      | Homo sapiens |
| 129080    | EMI domain containing 1                                                                                                                                                                                                                                                    | Homo sapiens |
| 7468      | Wolf-Hirschhorn syndrome candidate 1                                                                                                                                                                                                                                       | Homo sapiens |
| 23186     | REST corepressor 1                                                                                                                                                                                                                                                         | Homo sapiens |
| 10695     | canopy 3 homolog (zebrafish)                                                                                                                                                                                                                                               | Homo sapiens |
| 3008      | histone cluster 1, H1e                                                                                                                                                                                                                                                     | Homo sapiens |
| 9700      | extra spindle pole bodies homolog 1 (S. cerevisiae)                                                                                                                                                                                                                        | Homo sapiens |
| 1852      | dual specificity phosphatase 9                                                                                                                                                                                                                                             | Homo sapiens |
| 875       | cystathionine-beta-synthase                                                                                                                                                                                                                                                | Homo sapiens |
| 79815     | NIPA-like domain containing 2                                                                                                                                                                                                                                              | Homo sapiens |
| 55214     | leprecan-like 1                                                                                                                                                                                                                                                            | Homo sapiens |
| 51727     | cytidine monophosphate (UMP-CMP) kinase 1, cytosolic                                                                                                                                                                                                                       | Homo sapiens |
| 196743    | polyamine oxidase (exo-N4-amino)                                                                                                                                                                                                                                           | Homo sapiens |
| 4141      | methionyl-tRNA synthetase                                                                                                                                                                                                                                                  | Homo sapiens |
| 6745      | signal sequence receptor, alpha                                                                                                                                                                                                                                            | Homo sapiens |
| 1743      | dihydrolipoamide S-succinyltransferase (E2 component of 2-oxo-glutarate complex);<br>dihydrolipoamide S-succinyltransferase pseudogene (E2 component of 2-oxo-glutarate complex)                                                                                           | Homo sapiens |
| 1744      | dihydrolipoamide S-succinyltransferase (E2 component of 2-oxo-glutarate complex);<br>dihydrolipoamide S-succinyltransferase pseudogene (E2 component of 2-oxo-glutarate complex)                                                                                           | Homo sapiens |
| 89884     | LIM homeobox 4                                                                                                                                                                                                                                                             | Homo sapiens |
| 146223    | CKLF-like MARVEL transmembrane domain containing 4                                                                                                                                                                                                                         | Homo sapiens |
| 7157      | tumor protein p53                                                                                                                                                                                                                                                          | Homo sapiens |
| 79641     | rogdi homolog (Drosophila)                                                                                                                                                                                                                                                 | Homo sapiens |
| 51524     | transmembrane protein 138                                                                                                                                                                                                                                                  | Homo sapiens |
| 100131609 | heterogeneous nuclear ribonucleoprotein A1-like 3; similar to heterogeneous nuclear<br>ribonucleoprotein A1; heterogeneous nuclear ribonucleoprotein A1 pseudogene 2; heterogeneous<br>nuclear ribonucleoprotein A1; heterogeneous nuclear ribonucleoprotein A1 pseudogene | Homo sapiens |

|           |                                                                                                                                                                                                                                                                      |              |
|-----------|----------------------------------------------------------------------------------------------------------------------------------------------------------------------------------------------------------------------------------------------------------------------|--------------|
| 728643    | heterogeneous nuclear ribonucleoprotein A1-like 3; similar to heterogeneous nuclear ribonucleoprotein A1; heterogeneous nuclear ribonucleoprotein A1 pseudogene 2; heterogeneous nuclear ribonucleoprotein A1; heterogeneous nuclear ribonucleoprotein A1 pseudogene | Homo sapiens |
| 388275    | heterogeneous nuclear ribonucleoprotein A1-like 3; similar to heterogeneous nuclear ribonucleoprotein A1; heterogeneous nuclear ribonucleoprotein A1 pseudogene 2; heterogeneous nuclear ribonucleoprotein A1; heterogeneous nuclear ribonucleoprotein A1 pseudogene | Homo sapiens |
| 664709    | heterogeneous nuclear ribonucleoprotein A1-like 3; similar to heterogeneous nuclear ribonucleoprotein A1; heterogeneous nuclear ribonucleoprotein A1 pseudogene 2; heterogeneous nuclear ribonucleoprotein A1; heterogeneous nuclear ribonucleoprotein A1 pseudogene | Homo sapiens |
| 3178      | heterogeneous nuclear ribonucleoprotein A1-like 3; similar to heterogeneous nuclear ribonucleoprotein A1; heterogeneous nuclear ribonucleoprotein A1 pseudogene 2; heterogeneous nuclear ribonucleoprotein A1; heterogeneous nuclear ribonucleoprotein A1 pseudogene | Homo sapiens |
| 645691    | heterogeneous nuclear ribonucleoprotein A1-like 3; similar to heterogeneous nuclear ribonucleoprotein A1; heterogeneous nuclear ribonucleoprotein A1 pseudogene 2; heterogeneous nuclear ribonucleoprotein A1; heterogeneous nuclear ribonucleoprotein A1 pseudogene | Homo sapiens |
| 644037    | heterogeneous nuclear ribonucleoprotein A1-like 3; similar to heterogeneous nuclear ribonucleoprotein A1; heterogeneous nuclear ribonucleoprotein A1 pseudogene 2; heterogeneous nuclear ribonucleoprotein A1; heterogeneous nuclear ribonucleoprotein A1 pseudogene | Homo sapiens |
| 51322     | WW domain containing adaptor with coiled-coil                                                                                                                                                                                                                        | Homo sapiens |
| 146542    | zinc finger protein 688; zinc finger protein 785                                                                                                                                                                                                                     | Homo sapiens |
| 146540    | zinc finger protein 688; zinc finger protein 785                                                                                                                                                                                                                     | Homo sapiens |
| 26959     | HMG-box transcription factor 1                                                                                                                                                                                                                                       | Homo sapiens |
| 5166      | pyruvate dehydrogenase kinase, isozyme 4                                                                                                                                                                                                                             | Homo sapiens |
| 388698    | filaggrin family member 2                                                                                                                                                                                                                                            | Homo sapiens |
| 80856     | KIAA1715                                                                                                                                                                                                                                                             | Homo sapiens |
| 4440      | musashi homolog 1 (Drosophila)                                                                                                                                                                                                                                       | Homo sapiens |
| 3559      | interleukin 2 receptor, alpha                                                                                                                                                                                                                                        | Homo sapiens |
| 347734    | solute carrier family 35, member B2                                                                                                                                                                                                                                  | Homo sapiens |
| 64858     | DNA cross-link repair 1B (PSO2 homolog, S. cerevisiae)                                                                                                                                                                                                               | Homo sapiens |
| 116841    | synaptosomal-associated protein, 47kDa                                                                                                                                                                                                                               | Homo sapiens |
| 79628     | SH3 domain and tetratricopeptide repeats 2                                                                                                                                                                                                                           | Homo sapiens |
| 219855    | solute carrier family 37 (glycerol-3-phosphate transporter), member 2                                                                                                                                                                                                | Homo sapiens |
| 10768     | adenosylhomocysteinase-like 1                                                                                                                                                                                                                                        | Homo sapiens |
| 128977    | chromosome 22 open reading frame 39                                                                                                                                                                                                                                  | Homo sapiens |
| 23657     | solute carrier family 7, (cationic amino acid transporter, y+ system) member 11                                                                                                                                                                                      | Homo sapiens |
| 9939      | RNA binding motif protein 8A                                                                                                                                                                                                                                         | Homo sapiens |
| 100130446 | ribosomal protein S27a pseudogene 12; ribosomal protein S27a; ribosomal protein S27a pseudogene 11; ribosomal protein S27a pseudogene 16                                                                                                                             | Homo sapiens |
| 728590    | ribosomal protein S27a pseudogene 12; ribosomal protein S27a; ribosomal protein S27a pseudogene 11; ribosomal protein S27a pseudogene 16                                                                                                                             | Homo sapiens |
| 6233      | ribosomal protein S27a pseudogene 12; ribosomal protein S27a; ribosomal protein S27a pseudogene 11; ribosomal protein S27a pseudogene 16                                                                                                                             | Homo sapiens |
| 643358    | ribosomal protein S27a pseudogene 12; ribosomal protein S27a; ribosomal protein S27a pseudogene 11; ribosomal protein S27a pseudogene 16                                                                                                                             | Homo sapiens |
| 100128056 | similar to hCG2013701; CTD (carboxy-terminal domain, RNA polymerase II, polypeptide A) small phosphatase 2                                                                                                                                                           | Homo sapiens |
| 10106     | similar to hCG2013701; CTD (carboxy-terminal domain, RNA polymerase II, polypeptide A) small phosphatase 2                                                                                                                                                           | Homo sapiens |
| 1557      | cytochrome P450, family 2, subfamily C, polypeptide 19                                                                                                                                                                                                               | Homo sapiens |
| 5509      | protein phosphatase 1, regulatory (inhibitor) subunit 3D                                                                                                                                                                                                             | Homo sapiens |
| 5638      | proline rich Gla (G-carboxyglutamic acid) 1                                                                                                                                                                                                                          | Homo sapiens |
| 283349    | Ras association (RalGDS/AF-6) domain family member 3                                                                                                                                                                                                                 | Homo sapiens |
| 54933     | rhomboid, veinlet-like 2 (Drosophila)                                                                                                                                                                                                                                | Homo sapiens |
| 54014     | bromodomain and WD repeat domain containing 1                                                                                                                                                                                                                        | Homo sapiens |
| 9739      | SET domain containing 1A                                                                                                                                                                                                                                             | Homo sapiens |
| 718       | similar to Complement C3 precursor; complement component 3; hypothetical protein LOC100133511                                                                                                                                                                        | Homo sapiens |
| 653879    | similar to Complement C3 precursor; complement component 3; hypothetical protein LOC100133511                                                                                                                                                                        | Homo sapiens |
| 100133511 | similar to Complement C3 precursor; complement component 3; hypothetical protein LOC100133511                                                                                                                                                                        | Homo sapiens |
| 8295      | transformation/transcription domain-associated protein                                                                                                                                                                                                               | Homo sapiens |
| 55071     | chromosome 9 open reading frame 40                                                                                                                                                                                                                                   | Homo sapiens |
| 255057    | chromosome 19 open reading frame 26                                                                                                                                                                                                                                  | Homo sapiens |
| 8526      | diacylglycerol kinase, epsilon 64kDa                                                                                                                                                                                                                                 | Homo sapiens |
| 10666     | CD226 molecule                                                                                                                                                                                                                                                       | Homo sapiens |
| 3192      | heterogeneous nuclear ribonucleoprotein U (scaffold attachment factor A)                                                                                                                                                                                             | Homo sapiens |
| 10298     | p21 protein (Cdc42/Rac)-activated kinase 4                                                                                                                                                                                                                           | Homo sapiens |
| 57505     | alanyl-tRNA synthetase 2, mitochondrial (putative)                                                                                                                                                                                                                   | Homo sapiens |
| 55140     | elongation protein 3 homolog (S. cerevisiae)                                                                                                                                                                                                                         | Homo sapiens |
| 2149      | coagulation factor II (thrombin) receptor                                                                                                                                                                                                                            | Homo sapiens |
| 83939     | eukaryotic translation initiation factor 2A, 65kDa                                                                                                                                                                                                                   | Homo sapiens |
| 26118     | WD repeat and SOCS box-containing 1                                                                                                                                                                                                                                  | Homo sapiens |



|           |                                                                                                                                                                                       |              |
|-----------|---------------------------------------------------------------------------------------------------------------------------------------------------------------------------------------|--------------|
| 11052     | cleavage and polyadenylation specific factor 6, 68kDa                                                                                                                                 | Homo sapiens |
| 59283     | calcium channel, voltage-dependent, gamma subunit 8                                                                                                                                   | Homo sapiens |
| 22856     | chondroitin sulfate synthase 1                                                                                                                                                        | Homo sapiens |
| 54910     | sema domain, immunoglobulin domain (Ig), transmembrane domain (TM) and short cytoplasmic domain, (semaphorin) 4C                                                                      | Homo sapiens |
| 23326     | ubiquitin specific peptidase 22                                                                                                                                                       | Homo sapiens |
| 100131463 | similar to translocase of outer mitochondrial membrane 20 homolog; similar to mitochondrial outer membrane protein 19; translocase of outer mitochondrial membrane 20 homolog (yeast) | Homo sapiens |
| 100129272 | similar to translocase of outer mitochondrial membrane 20 homolog; similar to mitochondrial outer membrane protein 19; translocase of outer mitochondrial membrane 20 homolog (yeast) | Homo sapiens |
| 9804      | similar to translocase of outer mitochondrial membrane 20 homolog; similar to mitochondrial outer membrane protein 19; translocase of outer mitochondrial membrane 20 homolog (yeast) | Homo sapiens |
| 170506    | DEAH (Asp-Glu-Ala-His) box polypeptide 36                                                                                                                                             | Homo sapiens |
| 91404     | SEC14 and spectrin domains 1                                                                                                                                                          | Homo sapiens |
| 84259     | DCN1, defective in cullin neddylation 1, domain containing 5 ( <i>S. cerevisiae</i> )                                                                                                 | Homo sapiens |
| 64093     | SPARC related modular calcium binding 1                                                                                                                                               | Homo sapiens |
| 51343     | fizzy/cell division cycle 20 related 1 ( <i>Drosophila</i> )                                                                                                                          | Homo sapiens |
| 773       | calcium channel, voltage-dependent, P/Q type, alpha 1A subunit                                                                                                                        | Homo sapiens |
| 8061      | FOS-like antigen 1                                                                                                                                                                    | Homo sapiens |
| 389901    | X-ray repair complementing defective repair in Chinese hamster cells 6; similar to ATP-dependent DNA helicase II, 70 kDa subunit                                                      | Homo sapiens |
| 2547      | X-ray repair complementing defective repair in Chinese hamster cells 6; similar to ATP-dependent DNA helicase II, 70 kDa subunit                                                      | Homo sapiens |
| 896       | cyclin D3                                                                                                                                                                             | Homo sapiens |
| 144453    | bestrophin 3                                                                                                                                                                          | Homo sapiens |
| 64760     | family with sequence similarity 160, member B2                                                                                                                                        | Homo sapiens |
| 64321     | SRY (sex determining region Y)-box 17                                                                                                                                                 | Homo sapiens |
| 92285     | zinc finger protein 585B                                                                                                                                                              | Homo sapiens |
| 5602      | mitogen-activated protein kinase 10                                                                                                                                                   | Homo sapiens |
| 118788    | phosphoinositide-3-kinase adaptor protein 1                                                                                                                                           | Homo sapiens |
| 339230    | coiled-coil domain containing 137                                                                                                                                                     | Homo sapiens |
| 166348    | kelch domain containing 6                                                                                                                                                             | Homo sapiens |
| 252839    | transmembrane protein 9                                                                                                                                                               | Homo sapiens |
| 5362      | plexin A2                                                                                                                                                                             | Homo sapiens |
| 142679    | dual specificity phosphatase 19                                                                                                                                                       | Homo sapiens |
| 64778     | fibronectin type III domain containing 3B                                                                                                                                             | Homo sapiens |
| 59338     | pleckstrin homology domain containing, family A (phosphoinositide binding specific) member 1                                                                                          | Homo sapiens |
| 54811     | zinc finger protein 562                                                                                                                                                               | Homo sapiens |
| 84897     | transforming growth factor beta regulator 1                                                                                                                                           | Homo sapiens |
| 5218      | PFTAIRE protein kinase 1                                                                                                                                                              | Homo sapiens |
| 84901     | nuclear factor of activated T-cells, cytoplasmic, calcineurin-dependent 2 interacting protein                                                                                         | Homo sapiens |
| 25940     | family with sequence similarity 98, member A                                                                                                                                          | Homo sapiens |
| 149175    | mannosidase, endo-alpha-like                                                                                                                                                          | Homo sapiens |
| 10618     | trans-golgi network protein 2                                                                                                                                                         | Homo sapiens |
| 170384    | fucosyltransferase 11 (alpha (1,3) fucosyltransferase)                                                                                                                                | Homo sapiens |
| 11185     | indolethylamine N-methyltransferase                                                                                                                                                   | Homo sapiens |
| 440026    | transmembrane protein 41B                                                                                                                                                             | Homo sapiens |
| 54328     | G protein-coupled receptor 173                                                                                                                                                        | Homo sapiens |
| 26100     | WD repeat domain, phosphoinositide interacting 2                                                                                                                                      | Homo sapiens |
| 6642      | sorting nexin 1                                                                                                                                                                       | Homo sapiens |
| 47        | ATP citrate lyase                                                                                                                                                                     | Homo sapiens |
| 23306     | transmembrane protein 194A                                                                                                                                                            | Homo sapiens |
| 2013      | epithelial membrane protein 2                                                                                                                                                         | Homo sapiens |
| 115572    | family with sequence similarity 46, member B                                                                                                                                          | Homo sapiens |
| 55432     | YOD1 OTU deubiquinating enzyme 1 homolog ( <i>S. cerevisiae</i> )                                                                                                                     | Homo sapiens |
| 10614     | hexamethylene bis-acetamide inducible 1                                                                                                                                               | Homo sapiens |
| 285359    | phosducin-like 3 pseudogene; phosducin-like 3                                                                                                                                         | Homo sapiens |
| 79031     | phosducin-like 3 pseudogene; phosducin-like 3                                                                                                                                         | Homo sapiens |
| 64282     | PAP associated domain containing 5                                                                                                                                                    | Homo sapiens |
| 346389    | metastasis associated in colon cancer 1                                                                                                                                               | Homo sapiens |
| 9645      | microtubule associated monooxygenase, calponin and LIM domain containing 2                                                                                                            | Homo sapiens |
| 2869      | G protein-coupled receptor kinase 5                                                                                                                                                   | Homo sapiens |
| 7581      | zinc finger protein 33A                                                                                                                                                               | Homo sapiens |
| 10454     | mitogen-activated protein kinase kinase kinase 7 interacting protein 1                                                                                                                | Homo sapiens |
| 699       | budding uninhibited by benzimidazoles 1 homolog (yeast)                                                                                                                               | Homo sapiens |
| 10018     | BCL2-like 11 (apoptosis facilitator)                                                                                                                                                  | Homo sapiens |
| 84671     | zinc finger protein 347                                                                                                                                                               | Homo sapiens |
| 55558     | plexin A3                                                                                                                                                                             | Homo sapiens |
| 135152    | beta-1,3-glucuronyltransferase 2 (glucuronosyltransferase S)                                                                                                                          | Homo sapiens |
| 4835      | NAD(P)H dehydrogenase, quinone 2                                                                                                                                                      | Homo sapiens |
| 57179     | KIAA1191                                                                                                                                                                              | Homo sapiens |
| 23761     | phosphatidylserine decarboxylase                                                                                                                                                      | Homo sapiens |
| 9422      | zinc finger protein 264                                                                                                                                                               | Homo sapiens |
| 84656     | cytokine-like nuclear factor n-pac                                                                                                                                                    | Homo sapiens |

|        |                                                                                                                                                      |              |
|--------|------------------------------------------------------------------------------------------------------------------------------------------------------|--------------|
| 2354   | FBJ murine osteosarcoma viral oncogene homolog B                                                                                                     | Homo sapiens |
| 112495 | general transcription factor IIIC, polypeptide 6, alpha 35kDa                                                                                        | Homo sapiens |
| 56938  | aryl hydrocarbon receptor nuclear translocator-like 2                                                                                                | Homo sapiens |
| 51204  | coiled-coil domain containing 44                                                                                                                     | Homo sapiens |
| 23439  | ATPase, (Na+)/K+ transporting, beta 4 polypeptide                                                                                                    | Homo sapiens |
| 10196  | protein arginine methyltransferase 3                                                                                                                 | Homo sapiens |
| 138151 | NACC family member 2, BEN and BTB (POZ) domain containing                                                                                            | Homo sapiens |
| 203523 | zinc finger protein 449                                                                                                                              | Homo sapiens |
| 5928   | hypothetical LOC642954; retinoblastoma binding protein 4                                                                                             | Homo sapiens |
| 642954 | hypothetical LOC642954; retinoblastoma binding protein 4                                                                                             | Homo sapiens |
| 54499  | transmembrane and coiled-coil domains 1                                                                                                              | Homo sapiens |
| 4701   | NADH dehydrogenase (ubiquinone) 1 alpha subcomplex, 7, 14.5kDa                                                                                       | Homo sapiens |
| 90990  | kinesin family member C2                                                                                                                             | Homo sapiens |
| 91452  | acyl-Coenzyme A binding domain containing 5                                                                                                          | Homo sapiens |
| 8329   | histone cluster 1, H2ag; histone cluster 1, H2ah; histone cluster 1, H2ai; histone cluster 1, H2ak; histone cluster 1, H2al; histone cluster 1, H2am | Homo sapiens |
| 8330   | histone cluster 1, H2ag; histone cluster 1, H2ah; histone cluster 1, H2ai; histone cluster 1, H2ak; histone cluster 1, H2al; histone cluster 1, H2am | Homo sapiens |
| 8332   | histone cluster 1, H2ag; histone cluster 1, H2ah; histone cluster 1, H2ai; histone cluster 1, H2ak; histone cluster 1, H2al; histone cluster 1, H2am | Homo sapiens |
| 8336   | histone cluster 1, H2ag; histone cluster 1, H2ah; histone cluster 1, H2ai; histone cluster 1, H2ak; histone cluster 1, H2al; histone cluster 1, H2am | Homo sapiens |
| 8969   | histone cluster 1, H2ag; histone cluster 1, H2ah; histone cluster 1, H2ai; histone cluster 1, H2ak; histone cluster 1, H2al; histone cluster 1, H2am | Homo sapiens |
| 85235  | histone cluster 1, H2ag; histone cluster 1, H2ah; histone cluster 1, H2ai; histone cluster 1, H2ak; histone cluster 1, H2al; histone cluster 1, H2am | Homo sapiens |
| 599    | BCL2-like 2                                                                                                                                          | Homo sapiens |
| 6749   | structure specific recognition protein 1                                                                                                             | Homo sapiens |
| 80301  | pleckstrin homology domain containing, family 0 member 2                                                                                             | Homo sapiens |
| 833    | cysteinyln-tRNA synthetase                                                                                                                           | Homo sapiens |
| 124995 | mitochondrial ribosomal protein L10                                                                                                                  | Homo sapiens |
| 7490   | Wilms tumor 1                                                                                                                                        | Homo sapiens |
| 54557  | small glutamine-rich tetratricopeptide repeat (TPR)-containing, beta                                                                                 | Homo sapiens |
| 5867   | RAB4A, member RAS oncogene family                                                                                                                    | Homo sapiens |
| 7798   | leucine zipper protein 1                                                                                                                             | Homo sapiens |
| 7458   | eukaryotic translation initiation factor 4H                                                                                                          | Homo sapiens |
| 3340   | N-deacetylase/N-sulfotransferase (heparan glucosaminyl) 1                                                                                            | Homo sapiens |
| 6794   | serine/threonine kinase 11                                                                                                                           | Homo sapiens |
| 2037   | erythrocyte membrane protein band 4.1-like 2                                                                                                         | Homo sapiens |
| 11138  | TBC1 domain family, member 8 (with GRAM domain)                                                                                                      | Homo sapiens |
| 9464   | heart and neural crest derivatives expressed 2                                                                                                       | Homo sapiens |
| 51128  | SAR1 homolog B ( <i>S. cerevisiae</i> )                                                                                                              | Homo sapiens |
| 8795   | tumor necrosis factor receptor superfamily, member 10b                                                                                               | Homo sapiens |
| 3717   | Janus kinase 2                                                                                                                                       | Homo sapiens |
| 84439  | HHIP-like 1                                                                                                                                          | Homo sapiens |
| 9969   | mediator complex subunit 13                                                                                                                          | Homo sapiens |
| 391104 | von Hippel-Lindau tumor suppressor-like                                                                                                              | Homo sapiens |
| 84914  | zinc finger protein 587                                                                                                                              | Homo sapiens |
| 353376 | transmembrane emp24 protein transport domain containing 7; toll-like receptor adaptor molecule 2                                                     | Homo sapiens |
| 51014  | transmembrane emp24 protein transport domain containing 7; toll-like receptor adaptor molecule 2                                                     | Homo sapiens |
| 51071  | 2-deoxyribose-5-phosphate aldolase homolog ( <i>C. elegans</i> )                                                                                     | Homo sapiens |
| 493829 | tripartite motif-containing 72                                                                                                                       | Homo sapiens |
| 154141 | membrane bound O-acyltransferase domain containing 1                                                                                                 | Homo sapiens |
| 10019  | SH2B adaptor protein 3                                                                                                                               | Homo sapiens |
| 4150   | MYC-associated zinc finger protein (purine-binding transcription factor)                                                                             | Homo sapiens |
| 27005  | ubiquitin specific peptidase 21                                                                                                                      | Homo sapiens |
| 79744  | zinc finger protein 419                                                                                                                              | Homo sapiens |
| 11222  | mitochondrial ribosomal protein L3                                                                                                                   | Homo sapiens |
| 401409 | RAB19, member RAS oncogene family                                                                                                                    | Homo sapiens |
| 10040  | target of mybl (chicken)-like 1                                                                                                                      | Homo sapiens |
| 55690  | phosphofurin acidic cluster sorting protein 1                                                                                                        | Homo sapiens |
| 284391 | zinc finger protein 844                                                                                                                              | Homo sapiens |
| 6498   | SKI-like oncogene                                                                                                                                    | Homo sapiens |
| 54464  | 5'-3' exoribonuclease 1                                                                                                                              | Homo sapiens |
| 5191   | peroxisomal biogenesis factor 7                                                                                                                      | Homo sapiens |
| 2745   | glutaredoxin (thioltransferase)                                                                                                                      | Homo sapiens |
| 134218 | DnaJ (Hsp40) homolog, subfamily C, member 21                                                                                                         | Homo sapiens |
| 653881 | ribosomal protein L3; similar to 60S ribosomal protein L3 (L4)                                                                                       | Homo sapiens |
| 6122   | ribosomal protein L3; similar to 60S ribosomal protein L3 (L4)                                                                                       | Homo sapiens |
| 490    | ATPase, Ca++ transporting, plasma membrane 1                                                                                                         | Homo sapiens |
| 51228  | glycolipid transfer protein; glycolipid transfer protein pseudogene 1                                                                                | Homo sapiens |
| 645312 | glycolipid transfer protein; glycolipid transfer protein pseudogene 1                                                                                | Homo sapiens |
| 6404   | selectin P ligand                                                                                                                                    | Homo sapiens |
| 55617  | taspase, threonine aspartase, 1                                                                                                                      | Homo sapiens |
| 55149  | mitochondrial poly(A) polymerase                                                                                                                     | Homo sapiens |
| 54332  | ganglioside-induced differentiation-associated protein 1                                                                                             | Homo sapiens |
| 65082  | vacuolar protein sorting 33 homolog A ( <i>S. cerevisiae</i> )                                                                                       | Homo sapiens |

|        |                                                                                                                           |              |
|--------|---------------------------------------------------------------------------------------------------------------------------|--------------|
| 255027 | MPV17 mitochondrial membrane protein-like                                                                                 | Homo sapiens |
| 64225  | atlastin GTPase 2                                                                                                         | Homo sapiens |
| 64061  | TSPY-like 2                                                                                                               | Homo sapiens |
| 56140  | protocadherin alpha 8; protocadherin alpha 6                                                                              | Homo sapiens |
| 56142  | protocadherin alpha 8; protocadherin alpha 6                                                                              | Homo sapiens |
| 170961 | ankyrin repeat domain 24                                                                                                  | Homo sapiens |
| 1678   | translocase of inner mitochondrial membrane 8 homolog A (yeast)                                                           | Homo sapiens |
| 540    | ATPase, Cu <sup>++</sup> transporting, beta polypeptide                                                                   | Homo sapiens |
| 8602   | NOP14 nucleolar protein homolog (yeast)                                                                                   | Homo sapiens |
| 23288  | IQ motif containing E                                                                                                     | Homo sapiens |
| 123606 | non imprinted in Prader-Willi/Angelman syndrome 1                                                                         | Homo sapiens |
| 55762  | zinc finger protein 701                                                                                                   | Homo sapiens |
| 254251 | ligand dependent nuclear receptor corepressor-like                                                                        | Homo sapiens |
| 55871  | COBW domain containing 6; COBW domain containing 1                                                                        | Homo sapiens |
| 644019 | COBW domain containing 6; COBW domain containing 1                                                                        | Homo sapiens |
| 10969  | EBNA1 binding protein 2                                                                                                   | Homo sapiens |
| 150094 | salt-inducible kinase 1                                                                                                   | Homo sapiens |
| 10509  | sema domain, immunoglobulin domain (Ig), transmembrane domain (TM) and short cytoplasmic domain, (semaphorin) 4B          | Homo sapiens |
| 54913  | ribonuclease P/MRP 25kDa subunit                                                                                          | Homo sapiens |
| 9859   | centrosomal protein 170kDa                                                                                                | Homo sapiens |
| 8833   | guanine monphosphate synthetase                                                                                           | Homo sapiens |
| 84899  | transmembrane and tetratricopeptide repeat containing 4                                                                   | Homo sapiens |
| 28960  | decapping enzyme, scavenger                                                                                               | Homo sapiens |
| 129787 | transmembrane protein 18                                                                                                  | Homo sapiens |
| 284161 | glycerophosphodiester phosphodiesterase domain containing 1                                                               | Homo sapiens |
| 57556  | sema domain, transmembrane domain (TM), and cytoplasmic domain, (semaphorin) 6A                                           | Homo sapiens |
| 25896  | integrator complex subunit 7                                                                                              | Homo sapiens |
| 23295  | mahogunin, ring finger 1                                                                                                  | Homo sapiens |
| 8851   | cyclin-dependent kinase 5, regulatory subunit 1 (p35)                                                                     | Homo sapiens |
| 7039   | transforming growth factor, alpha                                                                                         | Homo sapiens |
| 11276  | AP1 gamma subunit binding protein 1                                                                                       | Homo sapiens |
| 6920   | transcription elongation factor A (SII), 3                                                                                | Homo sapiens |
| 5268   | serpin peptidase inhibitor, clade B (ovalbumin), member 5                                                                 | Homo sapiens |
| 347688 | tubulin, beta 8                                                                                                           | Homo sapiens |
| 51341  | zinc finger and BTB domain containing 7A                                                                                  | Homo sapiens |
| 1834   | dentin sialophosphoprotein                                                                                                | Homo sapiens |
| 6241   | ribonucleotide reductase M2 polypeptide                                                                                   | Homo sapiens |
| 57531  | HECT domain and ankyrin repeat containing, E3 ubiquitin protein ligase 1                                                  | Homo sapiens |
| 2549   | GRB2-associated binding protein 1                                                                                         | Homo sapiens |
| 9815   | G protein-coupled receptor kinase interacting ArfGAP 2                                                                    | Homo sapiens |
| 1399   | v-crK sarcoma virus CT10 oncogene homolog (avian)-like                                                                    | Homo sapiens |
| 27020  | neuroplastin                                                                                                              | Homo sapiens |
| 91662  | NLR family, pyrin domain containing 12                                                                                    | Homo sapiens |
| 339416 | ankyrin repeat domain 45                                                                                                  | Homo sapiens |
| 255488 | ring finger protein 144B                                                                                                  | Homo sapiens |
| 79786  | kelch-like 36 (Drosophila)                                                                                                | Homo sapiens |
| 11237  | ring finger protein 24                                                                                                    | Homo sapiens |
| 58487  | CREB/ATF bZIP transcription factor                                                                                        | Homo sapiens |
| 7516   | X-ray repair complementing defective repair in Chinese hamster cells 2                                                    | Homo sapiens |
| 286451 | Yipl domain family, member 6                                                                                              | Homo sapiens |
| 55692  | LUC7-like (S. cerevisiae)                                                                                                 | Homo sapiens |
| 8799   | peroxisomal biogenesis factor 11 beta                                                                                     | Homo sapiens |
| 10055  | SUMO1 activating enzyme subunit 1                                                                                         | Homo sapiens |
| 6628   | small nuclear ribonucleoprotein polypeptides B and B1                                                                     | Homo sapiens |
| 4500   | metallothionein 1L (gene/pseudogene); metallothionein 1E; metallothionein 1 pseudogene 3; metallothionein 1J (pseudogene) | Homo sapiens |
| 4498   | metallothionein 1L (gene/pseudogene); metallothionein 1E; metallothionein 1 pseudogene 3; metallothionein 1J (pseudogene) | Homo sapiens |
| 4493   | metallothionein 1L (gene/pseudogene); metallothionein 1E; metallothionein 1 pseudogene 3; metallothionein 1J (pseudogene) | Homo sapiens |
| 140851 | metallothionein 1L (gene/pseudogene); metallothionein 1E; metallothionein 1 pseudogene 3; metallothionein 1J (pseudogene) | Homo sapiens |
| 94241  | tumor protein p53 inducible nuclear protein 1                                                                             | Homo sapiens |
| 1029   | cyclin-dependent kinase inhibitor 2A (melanoma, p16, inhibits CDK4)                                                       | Homo sapiens |
| 3708   | inositol 1,4,5-triphosphate receptor, type 1                                                                              | Homo sapiens |
| 152815 | THAP domain containing 6                                                                                                  | Homo sapiens |
| 440590 | zyg-11 homolog A (C. elegans)                                                                                             | Homo sapiens |
| 81706  | protein phosphatase 1, regulatory (inhibitor) subunit 14C                                                                 | Homo sapiens |
| 8804   | cellular repressor of E1A-stimulated genes 1                                                                              | Homo sapiens |
| 4524   | 5,10-methylenetetrahydrofolate reductase (NADPH)                                                                          | Homo sapiens |
| 10112  | kinesin family member 20A                                                                                                 | Homo sapiens |
| 202915 | transmembrane protein 184A                                                                                                | Homo sapiens |
| 1783   | dynein, cytoplasmic 1, light intermediate chain 2                                                                         | Homo sapiens |
| 23234  | DnaJ (Hsp40) homolog, subfamily C, member 9                                                                               | Homo sapiens |
| 55355  | Holliday junction recognition protein                                                                                     | Homo sapiens |
| 253558 | lysocardiolipin acyltransferase 1                                                                                         | Homo sapiens |
| 9238   | transforming growth factor beta regulator 4                                                                               | Homo sapiens |
| 9725   | transmembrane protein 63A                                                                                                 | Homo sapiens |

|        |                                                                                                                                                                                                              |              |
|--------|--------------------------------------------------------------------------------------------------------------------------------------------------------------------------------------------------------------|--------------|
| 7056   | thrombomodulin                                                                                                                                                                                               | Homo sapiens |
| 2717   | galactosidase, alpha                                                                                                                                                                                         | Homo sapiens |
| 10094  | similar to actin related protein 2/3 complex subunit 3; hypothetical LOC729841; actin related protein 2/3 complex, subunit 3, 21kDa                                                                          | Homo sapiens |
| 729841 | similar to actin related protein 2/3 complex subunit 3; hypothetical LOC729841; actin related protein 2/3 complex, subunit 3, 21kDa                                                                          | Homo sapiens |
| 729494 | similar to actin related protein 2/3 complex subunit 3; hypothetical LOC729841; actin related protein 2/3 complex, subunit 3, 21kDa                                                                          | Homo sapiens |
| 80306  | mediator complex subunit 28                                                                                                                                                                                  | Homo sapiens |
| 23309  | SIN3 homolog B, transcription regulator (yeast)                                                                                                                                                              | Homo sapiens |
| 55591  | vezatin, adherens junctions transmembrane protein                                                                                                                                                            | Homo sapiens |
| 440093 | histone H3-like                                                                                                                                                                                              | Homo sapiens |
| 10923  | SUB1 homolog (S. cerevisiae)                                                                                                                                                                                 | Homo sapiens |
| 3202   | homeobox A5                                                                                                                                                                                                  | Homo sapiens |
| 10162  | lysophosphatidylcholine acyltransferase 3                                                                                                                                                                    | Homo sapiens |
| 4601   | MAX interactor 1                                                                                                                                                                                             | Homo sapiens |
| 85313  | peptidylprolyl isomerase (cyclophilin)-like 4                                                                                                                                                                | Homo sapiens |
| 7565   | zinc finger protein 17                                                                                                                                                                                       | Homo sapiens |
| 51747  | cisplatin resistance-associated overexpressed protein                                                                                                                                                        | Homo sapiens |
| 55017  | chromosome 14 open reading frame 119                                                                                                                                                                         | Homo sapiens |
| 10188  | tyrosine kinase, non-receptor, 2                                                                                                                                                                             | Homo sapiens |
| 79875  | thrombospondin, type I, domain containing 4                                                                                                                                                                  | Homo sapiens |
| 3547   | immunoglobulin superfamily, member 1                                                                                                                                                                         | Homo sapiens |
| 56143  | protocadherin alpha 5                                                                                                                                                                                        | Homo sapiens |
| 57595  | PDZ domain containing 4                                                                                                                                                                                      | Homo sapiens |
| 9056   | solute carrier family 7 (cationic amino acid transporter, y+ system), member 7                                                                                                                               | Homo sapiens |
| 55161  | transmembrane protein 33                                                                                                                                                                                     | Homo sapiens |
| 8492   | protease, serine, 12 (neurotrypsin, motopsin)                                                                                                                                                                | Homo sapiens |
| 83667  | sestrin 2                                                                                                                                                                                                    | Homo sapiens |
| 10985  | GCN1 general control of amino-acid synthesis 1-like 1 (yeast)                                                                                                                                                | Homo sapiens |
| 23243  | ankyrin repeat domain 28                                                                                                                                                                                     | Homo sapiens |
| 140612 | zinc finger protein 28 homolog (mouse)                                                                                                                                                                       | Homo sapiens |
| 55280  | CWF19-like 1, cell cycle control (S. pombe)                                                                                                                                                                  | Homo sapiens |
| 23067  | SET domain containing 1B                                                                                                                                                                                     | Homo sapiens |
| 2280   | FK506 binding protein 1A, 12kDa                                                                                                                                                                              | Homo sapiens |
| 9314   | Kruppel-like factor 4 (gut)                                                                                                                                                                                  | Homo sapiens |
| 171023 | additional sex combs like 1 (Drosophila)                                                                                                                                                                     | Homo sapiens |
| 339834 | coiled-coil domain containing 36                                                                                                                                                                             | Homo sapiens |
| 11215  | A kinase (PRKA) anchor protein 11                                                                                                                                                                            | Homo sapiens |
| 51728  | polymerase (RNA) III (DNA directed) polypeptide K, 12.3 kDa                                                                                                                                                  | Homo sapiens |
| 64210  | MMS19 nucleotide excision repair homolog (S. cerevisiae)                                                                                                                                                     | Homo sapiens |
| 9741   | lysosomal protein transmembrane 4 alpha                                                                                                                                                                      | Homo sapiens |
| 84858  | zinc finger protein 503                                                                                                                                                                                      | Homo sapiens |
| 2057   | erythropoietin receptor                                                                                                                                                                                      | Homo sapiens |
| 376693 | ribosomal protein S10; ribosomal protein S10 pseudogene 4; ribosomal protein S10 pseudogene 11; ribosomal protein S10 pseudogene 22; ribosomal protein S10 pseudogene 7; ribosomal protein S10 pseudogene 13 | Homo sapiens |
| 401817 | ribosomal protein S10; ribosomal protein S10 pseudogene 4; ribosomal protein S10 pseudogene 11; ribosomal protein S10 pseudogene 22; ribosomal protein S10 pseudogene 7; ribosomal protein S10 pseudogene 13 | Homo sapiens |
| 6204   | ribosomal protein S10; ribosomal protein S10 pseudogene 4; ribosomal protein S10 pseudogene 11; ribosomal protein S10 pseudogene 22; ribosomal protein S10 pseudogene 7; ribosomal protein S10 pseudogene 13 | Homo sapiens |
| 728791 | ribosomal protein S10; ribosomal protein S10 pseudogene 4; ribosomal protein S10 pseudogene 11; ribosomal protein S10 pseudogene 22; ribosomal protein S10 pseudogene 7; ribosomal protein S10 pseudogene 13 | Homo sapiens |
| 391833 | ribosomal protein S10; ribosomal protein S10 pseudogene 4; ribosomal protein S10 pseudogene 11; ribosomal protein S10 pseudogene 22; ribosomal protein S10 pseudogene 7; ribosomal protein S10 pseudogene 13 | Homo sapiens |
| 646785 | ribosomal protein S10; ribosomal protein S10 pseudogene 4; ribosomal protein S10 pseudogene 11; ribosomal protein S10 pseudogene 22; ribosomal protein S10 pseudogene 7; ribosomal protein S10 pseudogene 13 | Homo sapiens |
| 11165  | nudix (nucleoside diphosphate linked moiety X)-type motif 3                                                                                                                                                  | Homo sapiens |
| 10914  | poly(A) polymerase alpha                                                                                                                                                                                     | Homo sapiens |
| 387263 | chromosome 6 open reading frame 120                                                                                                                                                                          | Homo sapiens |
| 1994   | ELAV (embryonic lethal, abnormal vision, Drosophila)-like 1 (Hu antigen R)                                                                                                                                   | Homo sapiens |
| 253959 | GTPase activating Rap/RanGAP domain-like 1                                                                                                                                                                   | Homo sapiens |
| 6792   | cyclin-dependent kinase-like 5                                                                                                                                                                               | Homo sapiens |
| 79654  | HECT domain containing 3                                                                                                                                                                                     | Homo sapiens |
| 79728  | partner and localizer of BRCA2                                                                                                                                                                               | Homo sapiens |
| 80349  | WD repeat domain 61                                                                                                                                                                                          | Homo sapiens |
| 29079  | mediator complex subunit 4                                                                                                                                                                                   | Homo sapiens |
| 26003  | golgi reassembly stacking protein 2, 55kDa                                                                                                                                                                   | Homo sapiens |
| 781    | calcium channel, voltage-dependent, alpha 2/delta subunit 1                                                                                                                                                  | Homo sapiens |
| 79719  | alpha- and gamma-adaptin-binding protein p34                                                                                                                                                                 | Homo sapiens |
| 5428   | polymerase (DNA directed), gamma                                                                                                                                                                             | Homo sapiens |
| 55632  | G2/M-phase specific E3 ubiquitin ligase                                                                                                                                                                      | Homo sapiens |
| 374875 | hydroxysteroid (11-beta) dehydrogenase 1-like                                                                                                                                                                | Homo sapiens |
| 7064   | thimet oligopeptidase 1                                                                                                                                                                                      | Homo sapiens |

|        |                                                                                                                                                                                                                                                                 |              |
|--------|-----------------------------------------------------------------------------------------------------------------------------------------------------------------------------------------------------------------------------------------------------------------|--------------|
| 7334   | ubiquitin-conjugating enzyme E2N (UBC13 homolog, yeast)                                                                                                                                                                                                         | Homo sapiens |
| 9873   | FCH and double SH3 domains 2                                                                                                                                                                                                                                    | Homo sapiens |
| 3833   | kinesin family member C1                                                                                                                                                                                                                                        | Homo sapiens |
| 201255 | leucine rich repeat containing 45                                                                                                                                                                                                                               | Homo sapiens |
| 643300 | heat shock 60kDa protein 1 (chaperonin) pseudogene 5; heat shock 60kDa protein 1 (chaperonin) pseudogene 6; heat shock 60kDa protein 1 (chaperonin) pseudogene 1; heat shock 60kDa protein 1 (chaperonin) pseudogene 4; heat shock 60kDa protein 1 (chaperonin) | Homo sapiens |
| 3329   | heat shock 60kDa protein 1 (chaperonin) pseudogene 5; heat shock 60kDa protein 1 (chaperonin) pseudogene 6; heat shock 60kDa protein 1 (chaperonin) pseudogene 1; heat shock 60kDa protein 1 (chaperonin) pseudogene 4; heat shock 60kDa protein 1 (chaperonin) | Homo sapiens |
| 345041 | heat shock 60kDa protein 1 (chaperonin) pseudogene 5; heat shock 60kDa protein 1 (chaperonin) pseudogene 6; heat shock 60kDa protein 1 (chaperonin) pseudogene 1; heat shock 60kDa protein 1 (chaperonin) pseudogene 4; heat shock 60kDa protein 1 (chaperonin) | Homo sapiens |
| 645548 | heat shock 60kDa protein 1 (chaperonin) pseudogene 5; heat shock 60kDa protein 1 (chaperonin) pseudogene 6; heat shock 60kDa protein 1 (chaperonin) pseudogene 1; heat shock 60kDa protein 1 (chaperonin) pseudogene 4; heat shock 60kDa protein 1 (chaperonin) | Homo sapiens |
| 644745 | heat shock 60kDa protein 1 (chaperonin) pseudogene 5; heat shock 60kDa protein 1 (chaperonin) pseudogene 6; heat shock 60kDa protein 1 (chaperonin) pseudogene 1; heat shock 60kDa protein 1 (chaperonin) pseudogene 4; heat shock 60kDa protein 1 (chaperonin) | Homo sapiens |
| 710    | serpin peptidase inhibitor, clade G (C1 inhibitor), member 1                                                                                                                                                                                                    | Homo sapiens |
| 23637  | RAB GTPase activating protein 1                                                                                                                                                                                                                                 | Homo sapiens |
| 11057  | abhydrolase domain containing 2                                                                                                                                                                                                                                 | Homo sapiens |
| 326625 | methylmalonic aciduria (cobalamin deficiency) cb1B type                                                                                                                                                                                                         | Homo sapiens |
| 4643   | myosin IE                                                                                                                                                                                                                                                       | Homo sapiens |
| 55143  | cell division cycle associated 8                                                                                                                                                                                                                                | Homo sapiens |
| 2069   | epiregulin                                                                                                                                                                                                                                                      | Homo sapiens |
| 9868   | translocase of outer mitochondrial membrane 70 homolog A ( <i>S. cerevisiae</i> )                                                                                                                                                                               | Homo sapiens |
| 5610   | eukaryotic translation initiation factor 2-alpha kinase 2                                                                                                                                                                                                       | Homo sapiens |
| 643836 | zinc finger protein 62 homolog (mouse)                                                                                                                                                                                                                          | Homo sapiens |
| 58191  | chemokine (C-X-C motif) ligand 16                                                                                                                                                                                                                               | Homo sapiens |
| 148789 | beta-1,3-N-acetylgalactosaminyltransferase 2                                                                                                                                                                                                                    | Homo sapiens |
| 29928  | translocase of inner mitochondrial membrane 22 homolog (yeast)                                                                                                                                                                                                  | Homo sapiens |
| 11260  | exportin, tRNA (nuclear export receptor for tRNAs); similar to Exportin-T (tRNA exportin) (Exportin(tRNA))                                                                                                                                                      | Homo sapiens |
| 441228 | exportin, tRNA (nuclear export receptor for tRNAs); similar to Exportin-T (tRNA exportin) (Exportin(tRNA))                                                                                                                                                      | Homo sapiens |
| 89874  | solute carrier family 25 (mitochondrial oxodicarboxylate carrier), member 21                                                                                                                                                                                    | Homo sapiens |
| 143187 | vesicle transport through interaction with t-SNAREs homolog 1A (yeast)                                                                                                                                                                                          | Homo sapiens |
| 442113 | protein tyrosine phosphatase, non-receptor type 11; similar to protein tyrosine phosphatase, non-receptor type 11                                                                                                                                               | Homo sapiens |
| 5781   | protein tyrosine phosphatase, non-receptor type 11; similar to protein tyrosine phosphatase, non-receptor type 11                                                                                                                                               | Homo sapiens |
| 344593 | protein tyrosine phosphatase, non-receptor type 11; similar to protein tyrosine phosphatase, non-receptor type 11                                                                                                                                               | Homo sapiens |
| 55716  | limb region 1 homolog (mouse)-like                                                                                                                                                                                                                              | Homo sapiens |
| 9064   | mitogen-activated protein kinase kinase kinase 6                                                                                                                                                                                                                | Homo sapiens |
| 54980  | chromosome 2 open reading frame 42                                                                                                                                                                                                                              | Homo sapiens |
| 80179  | myosin XIX                                                                                                                                                                                                                                                      | Homo sapiens |
| 10425  | ariadne homolog 2 ( <i>Drosophila</i> )                                                                                                                                                                                                                         | Homo sapiens |
| 7188   | TNF receptor-associated factor 5                                                                                                                                                                                                                                | Homo sapiens |
| 56146  | protocadherin alpha 2                                                                                                                                                                                                                                           | Homo sapiens |
| 170589 | glycoprotein hormone alpha 2                                                                                                                                                                                                                                    | Homo sapiens |
| 23232  | TBC1 domain family, member 12                                                                                                                                                                                                                                   | Homo sapiens |
| 199857 | asparagine-linked glycosylation 14 homolog ( <i>S. cerevisiae</i> )                                                                                                                                                                                             | Homo sapiens |
| 55775  | tyrosyl-DNA phosphodiesterase 1                                                                                                                                                                                                                                 | Homo sapiens |
| 9049   | aryl hydrocarbon receptor interacting protein                                                                                                                                                                                                                   | Homo sapiens |
| 2683   | UDP-Gal:betaGlcNAc beta 1,4- galactosyltransferase, polypeptide 1                                                                                                                                                                                               | Homo sapiens |
| 5609   | mitogen-activated protein kinase kinase 7                                                                                                                                                                                                                       | Homo sapiens |
| 9592   | immediate early response 2                                                                                                                                                                                                                                      | Homo sapiens |
| 4884   | neuronal pentraxin I                                                                                                                                                                                                                                            | Homo sapiens |
| 2029   | endosulfine alpha                                                                                                                                                                                                                                               | Homo sapiens |
| 657    | bone morphogenetic protein receptor, type IA; similar to ALK-3                                                                                                                                                                                                  | Homo sapiens |
| 643778 | bone morphogenetic protein receptor, type IA; similar to ALK-3                                                                                                                                                                                                  | Homo sapiens |
| 84520  | chromosome 14 open reading frame 142                                                                                                                                                                                                                            | Homo sapiens |
| 55922  | NFKB repressing factor                                                                                                                                                                                                                                          | Homo sapiens |
| 3897   | L1 cell adhesion molecule                                                                                                                                                                                                                                       | Homo sapiens |
| 7009   | transmembrane BAX inhibitor motif containing 6                                                                                                                                                                                                                  | Homo sapiens |
| 7057   | thrombospondin 1                                                                                                                                                                                                                                                | Homo sapiens |
| 10479  | solute carrier family 9 (sodium/hydrogen exchanger), member 6                                                                                                                                                                                                   | Homo sapiens |
| 7411   | von Hippel-Lindau binding protein 1                                                                                                                                                                                                                             | Homo sapiens |
| 646791 | similar to Acidic leucine-rich nuclear phosphoprotein 32 family member B (PHAPI2 protein) (Silver-stainable protein SSP29) (Acidic protein rich in leucines); acidic (leucine-rich) nuclear phosphoprotein 32 family, member B                                  | Homo sapiens |
| 10541  | similar to Acidic leucine-rich nuclear phosphoprotein 32 family member B (PHAPI2 protein) (Silver-stainable protein SSP29) (Acidic protein rich in leucines); acidic (leucine-rich) nuclear phosphoprotein 32 family, member B                                  | Homo sapiens |
| 79050  | nucleolar complex associated 4 homolog ( <i>S. cerevisiae</i> )                                                                                                                                                                                                 | Homo sapiens |
| 64115  | chromosome 10 open reading frame 54                                                                                                                                                                                                                             | Homo sapiens |
| 84311  | mitochondrial ribosomal protein L45                                                                                                                                                                                                                             | Homo sapiens |

|           |                                                                                                                                                                                    |              |
|-----------|------------------------------------------------------------------------------------------------------------------------------------------------------------------------------------|--------------|
| 83445     | germ cell associated 1                                                                                                                                                             | Homo sapiens |
| 134266    | GrpE-like 2, mitochondrial (E. coli)                                                                                                                                               | Homo sapiens |
| 7027      | transcription factor Dp-1                                                                                                                                                          | Homo sapiens |
| 1389      | cAMP responsive element binding protein-like 2                                                                                                                                     | Homo sapiens |
| 5139      | phosphodiesterase 3A, cGMP-inhibited                                                                                                                                               | Homo sapiens |
| 56033     | BARX homeobox 1                                                                                                                                                                    | Homo sapiens |
| 4351      | mannose phosphate isomerase                                                                                                                                                        | Homo sapiens |
| 10483     | Sec23 homolog B (S. cerevisiae)                                                                                                                                                    | Homo sapiens |
| 7058      | thrombospondin 2                                                                                                                                                                   | Homo sapiens |
| 55596     | zinc finger, CCHC domain containing 8                                                                                                                                              | Homo sapiens |
| 3267      | ArfGAP with FG repeats 1                                                                                                                                                           | Homo sapiens |
| 3418      | isocitrate dehydrogenase 2 (NADP+), mitochondrial                                                                                                                                  | Homo sapiens |
| 10947     | adaptor-related protein complex 3, mu 2 subunit                                                                                                                                    | Homo sapiens |
| 23013     | spen homolog, transcriptional regulator (Drosophila)                                                                                                                               | Homo sapiens |
| 57515     | serine incorporator 1                                                                                                                                                              | Homo sapiens |
| 23019     | CCR4-NOT transcription complex, subunit 1                                                                                                                                          | Homo sapiens |
| 79931     | TNFAIP3 interacting protein 3                                                                                                                                                      | Homo sapiens |
| 387921    | NHL repeat containing 3                                                                                                                                                            | Homo sapiens |
| 160418    | transmembrane and tetratricopeptide repeat containing 3                                                                                                                            | Homo sapiens |
| 9567      | GTP binding protein 1                                                                                                                                                              | Homo sapiens |
| 124923    | uncharacterized serine/threonine-protein kinase Sgk494                                                                                                                             | Homo sapiens |
| 147007    | transmembrane protein 199                                                                                                                                                          | Homo sapiens |
| 10965     | acyl-CoA thioesterase 2                                                                                                                                                            | Homo sapiens |
| 26160     | intraflagellar transport 172 homolog (Chlamydomonas)                                                                                                                               | Homo sapiens |
| 23080     | AVL9 homolog (S. cerevisiae)                                                                                                                                                       | Homo sapiens |
| 57533     | TBC1 domain family, member 14                                                                                                                                                      | Homo sapiens |
| 283       | angiogenin, ribonuclease, RNase A family, 5                                                                                                                                        | Homo sapiens |
| 27348     | torsin family 1, member B (torsin B)                                                                                                                                               | Homo sapiens |
| 84068     | solute carrier family 10 (sodium/bile acid cotransporter family), member 7                                                                                                         | Homo sapiens |
| 54700     | RRN3 RNA polymerase I transcription factor homolog (S. cerevisiae)                                                                                                                 | Homo sapiens |
| 115209    | OMA1 homolog, zinc metallopeptidase (S. cerevisiae)                                                                                                                                | Homo sapiens |
| 4725      | similar to NADH dehydrogenase (ubiquinone) Fe-S protein 5, 15kDa (NADH-coenzyme Q reductase);<br>NADH dehydrogenase (ubiquinone) Fe-S protein 5, 15kDa (NADH-coenzyme Q reductase) | Homo sapiens |
| 100130794 | similar to NADH dehydrogenase (ubiquinone) Fe-S protein 5, 15kDa (NADH-coenzyme Q reductase);<br>NADH dehydrogenase (ubiquinone) Fe-S protein 5, 15kDa (NADH-coenzyme Q reductase) | Homo sapiens |
| 10671     | dynactin 6                                                                                                                                                                         | Homo sapiens |
| 7539      | zinc finger protein 37 homolog (mouse)                                                                                                                                             | Homo sapiens |
| 221504    | zinc finger and BTB domain containing 9                                                                                                                                            | Homo sapiens |
| 11016     | activating transcription factor 7                                                                                                                                                  | Homo sapiens |
| 158158    | RAS and EF-hand domain containing                                                                                                                                                  | Homo sapiens |
| 23185     | La ribonucleoprotein domain family, member 4B                                                                                                                                      | Homo sapiens |
| 100130009 | hypothetical LOC100130009; high mobility group AT-hook 1                                                                                                                           | Homo sapiens |
| 3159      | hypothetical LOC100130009; high mobility group AT-hook 1                                                                                                                           | Homo sapiens |
| 84838     | zinc finger protein 496                                                                                                                                                            | Homo sapiens |
| 29763     | protein kinase C and casein kinase substrate in neurons 3                                                                                                                          | Homo sapiens |
| 84957     | RELT tumor necrosis factor receptor                                                                                                                                                | Homo sapiens |
| 9754      | StAR-related lipid transfer (START) domain containing 8                                                                                                                            | Homo sapiens |
| 9088      | protein kinase, membrane associated tyrosine/threonine 1                                                                                                                           | Homo sapiens |
| 9032      | transmembrane 4 L six family member 5                                                                                                                                              | Homo sapiens |
| 57479     | proline rich 12                                                                                                                                                                    | Homo sapiens |
| 57555     | neuroligin 2                                                                                                                                                                       | Homo sapiens |
| 84859     | leucine-rich repeats and calponin homology (CH) domain containing 3                                                                                                                | Homo sapiens |
| 57691     | KIAA1586                                                                                                                                                                           | Homo sapiens |
| 23129     | plexin D1                                                                                                                                                                          | Homo sapiens |
| 7105      | tetraspanin 6                                                                                                                                                                      | Homo sapiens |
| 51621     | Kruppel-like factor 13                                                                                                                                                             | Homo sapiens |
| 27069     | growth hormone inducible transmembrane protein                                                                                                                                     | Homo sapiens |
| 9265      | cytohesin 3                                                                                                                                                                        | Homo sapiens |
| 84337     | elongation factor 1 homolog (S. cerevisiae)                                                                                                                                        | Homo sapiens |
| 27112     | family with sequence similarity 155, member B                                                                                                                                      | Homo sapiens |
| 51155     | hematological and neurological expressed 1                                                                                                                                         | Homo sapiens |
| 219988    | protein associated with topoisomerase II homolog 1 (yeast)                                                                                                                         | Homo sapiens |
| 345193    | leucine-rich repeat, immunoglobulin-like and transmembrane domains 3                                                                                                               | Homo sapiens |
| 126259    | transmembrane and immunoglobulin domain containing 2                                                                                                                               | Homo sapiens |
| 3094      | histidine triad nucleotide binding protein 1                                                                                                                                       | Homo sapiens |
| 7169      | tropomyosin 2 (beta)                                                                                                                                                               | Homo sapiens |
| 81502     | histocompatibility (minor) 13                                                                                                                                                      | Homo sapiens |
| 3017      | histone cluster 1, H2bd                                                                                                                                                            | Homo sapiens |
| 2114      | v-ets erythroblastosis virus E26 oncogene homolog 2 (avian)                                                                                                                        | Homo sapiens |
| 2950      | glutathione S-transferase pi 1                                                                                                                                                     | Homo sapiens |
| 9139      | core-binding factor, runt domain, alpha subunit 2; translocated to, 2                                                                                                              | Homo sapiens |
| 9633      | metallothionein-like 5, testis-specific (tesmin)                                                                                                                                   | Homo sapiens |
| 2764      | glia maturation factor, beta                                                                                                                                                       | Homo sapiens |
| 727896    | cysteine and histidine-rich domain (CHORD)-containing 1; cysteine and histidine-rich domain<br>(CHORD)-containing 1 pseudogene                                                     | Homo sapiens |
| 26973     | cysteine and histidine-rich domain (CHORD)-containing 1; cysteine and histidine-rich domain<br>(CHORD)-containing 1 pseudogene                                                     | Homo sapiens |

|           |                                                                                                                                              |              |
|-----------|----------------------------------------------------------------------------------------------------------------------------------------------|--------------|
| 654364    | non-metastatic cells 1, protein (NM23A) expressed in; NME1-NME2 readthrough transcript; non-metastatic cells 2, protein (NM23B) expressed in | Homo sapiens |
| 4830      | non-metastatic cells 1, protein (NM23A) expressed in; NME1-NME2 readthrough transcript; non-metastatic cells 2, protein (NM23B) expressed in | Homo sapiens |
| 4831      | non-metastatic cells 1, protein (NM23A) expressed in; NME1-NME2 readthrough transcript; non-metastatic cells 2, protein (NM23B) expressed in | Homo sapiens |
| 2771      | guanine nucleotide binding protein (G protein), alpha inhibiting activity polypeptide 2                                                      | Homo sapiens |
| 727936    | glycosyltransferase 8 domain containing 4                                                                                                    | Homo sapiens |
| 55577     | N-acetylglucosamine kinase                                                                                                                   | Homo sapiens |
| 388567    | zinc finger protein 749                                                                                                                      | Homo sapiens |
| 8938      | BALL-associated protein 3                                                                                                                    | Homo sapiens |
| 11161     | chromosome 14 open reading frame 1                                                                                                           | Homo sapiens |
| 9860      | leucine-rich repeats and immunoglobulin-like domains 2                                                                                       | Homo sapiens |
| 10121     | ARPI actin-related protein 1 homolog A, cetractin alpha (yeast)                                                                              | Homo sapiens |
| 60401     | ectodysplasin A2 receptor                                                                                                                    | Homo sapiens |
| 57541     | zinc finger protein 398                                                                                                                      | Homo sapiens |
| 7517      | X-ray repair complementing defective repair in Chinese hamster cells 3                                                                       | Homo sapiens |
| 8165      | A kinase (PRKA) anchor protein 1                                                                                                             | Homo sapiens |
| 8613      | phosphatidic acid phosphatase type 2B                                                                                                        | Homo sapiens |
| 23284     | latrophilin 3                                                                                                                                | Homo sapiens |
| 116984    | ArfGAP with RhoGAP domain, ankyrin repeat and PH domain 2                                                                                    | Homo sapiens |
| 6728      | signal recognition particle 19kDa                                                                                                            | Homo sapiens |
| 23460     | ATP-binding cassette, sub-family A (ABC1), member 6                                                                                          | Homo sapiens |
| 84253     | GTPase activating Rap/RanGAP domain-like 3                                                                                                   | Homo sapiens |
| 200933    | F-box protein 45                                                                                                                             | Homo sapiens |
| 10652     | YKT6 v-SNARE homolog (S. cerevisiae)                                                                                                         | Homo sapiens |
| 26267     | F-box protein 10                                                                                                                             | Homo sapiens |
| 64599     | GRB10 interacting GYF protein 1                                                                                                              | Homo sapiens |
| 11056     | DEAD (Asp-Glu-Ala-Asp) box polypeptide 52                                                                                                    | Homo sapiens |
| 127670    | transmembrane epididymal protein 1                                                                                                           | Homo sapiens |
| 342371    | ataxin 1-like                                                                                                                                | Homo sapiens |
| 8624      | proteasome (prosome, macropain) assembly chaperone 1                                                                                         | Homo sapiens |
| 51166     | aminoadipate aminotransferase                                                                                                                | Homo sapiens |
| 29988     | solute carrier family 2 (facilitated glucose transporter), member 8                                                                          | Homo sapiens |
| 29101     | SSU72 RNA polymerase II CTD phosphatase homolog (S. cerevisiae)                                                                              | Homo sapiens |
| 4091      | SMAD family member 6                                                                                                                         | Homo sapiens |
| 1545      | cytochrome P450, family 1, subfamily B, polypeptide 1                                                                                        | Homo sapiens |
| 23174     | zinc finger, CCHC domain containing 14                                                                                                       | Homo sapiens |
| 158511    | chondrosarcoma associated gene 1                                                                                                             | Homo sapiens |
| 200312    | ring finger protein 215                                                                                                                      | Homo sapiens |
| 835       | caspase 2, apoptosis-related cysteine peptidase                                                                                              | Homo sapiens |
| 93611     | F-box protein 44                                                                                                                             | Homo sapiens |
| 7555      | CCHC-type zinc finger, nucleic acid binding protein                                                                                          | Homo sapiens |
| 23406     | coactosin-like 1 (Dictyostelium)                                                                                                             | Homo sapiens |
| 8411      | early endosome antigen 1                                                                                                                     | Homo sapiens |
| 864       | runt-related transcription factor 3                                                                                                          | Homo sapiens |
| 64417     | chromosome 5 open reading frame 28                                                                                                           | Homo sapiens |
| 79939     | solute carrier family 35, member E1                                                                                                          | Homo sapiens |
| 56647     | BRCA2 and CDKN1A interacting protein                                                                                                         | Homo sapiens |
| 145482    | prostaglandin reductase 2                                                                                                                    | Homo sapiens |
| 84925     | disrupted in renal carcinoma 2                                                                                                               | Homo sapiens |
| 51477     | inositol-3-phosphate synthase 1                                                                                                              | Homo sapiens |
| 5802      | protein tyrosine phosphatase, receptor type, S                                                                                               | Homo sapiens |
| 23542     | mitogen-activated protein kinase 8 interacting protein 2                                                                                     | Homo sapiens |
| 4774      | nuclear factor I/A                                                                                                                           | Homo sapiens |
| 9882      | TBC1 domain family, member 4                                                                                                                 | Homo sapiens |
| 6256      | retinoid X receptor, alpha                                                                                                                   | Homo sapiens |
| 4858      | neuro-oncological ventral antigen 2                                                                                                          | Homo sapiens |
| 7425      | VGF nerve growth factor inducible                                                                                                            | Homo sapiens |
| 64781     | ceramide kinase                                                                                                                              | Homo sapiens |
| 93323     | HAUS augmin-like complex, subunit 8                                                                                                          | Homo sapiens |
| 25851     | tectonin beta-propeller repeat containing 1                                                                                                  | Homo sapiens |
| 9921      | ring finger protein 10                                                                                                                       | Homo sapiens |
| 3707      | inositol 1,4,5-trisphosphate 3-kinase B                                                                                                      | Homo sapiens |
| 140735    | dynein, light chain, LC8-type 2                                                                                                              | Homo sapiens |
| 7317      | ubiquitin-like modifier activating enzyme 1                                                                                                  | Homo sapiens |
| 51575     | similar to ABT1-associated protein; ESF1, nucleolar pre-rRNA processing protein, homolog (S. cerevisiae)                                     | Homo sapiens |
| 100131254 | similar to ABT1-associated protein; ESF1, nucleolar pre-rRNA processing protein, homolog (S. cerevisiae)                                     | Homo sapiens |
| 6253      | reticulon 2                                                                                                                                  | Homo sapiens |
| 160857    | coiled-coil domain containing 122                                                                                                            | Homo sapiens |
| 35        | acyl-Coenzyme A dehydrogenase, C-2 to C-3 short chain                                                                                        | Homo sapiens |
| 53354     | pantothenate kinase 1                                                                                                                        | Homo sapiens |
| 80018     | chromosome 12 open reading frame 30                                                                                                          | Homo sapiens |
| 367       | androgen receptor                                                                                                                            | Homo sapiens |
| 5465      | peroxisome proliferator-activated receptor alpha                                                                                             | Homo sapiens |
| 4259      | microsomal glutathione S-transferase 3                                                                                                       | Homo sapiens |
| 9423      | netrin 1                                                                                                                                     | Homo sapiens |

|        |                                                                                                                                             |              |
|--------|---------------------------------------------------------------------------------------------------------------------------------------------|--------------|
| 4697   | NADH dehydrogenase (ubiquinone) 1 alpha subcomplex, 4, 9kDa                                                                                 | Homo sapiens |
| 163351 | guanylate binding protein family, member 6                                                                                                  | Homo sapiens |
| 8228   | patatin-like phospholipase domain containing 4                                                                                              | Homo sapiens |
| 7533   | tyrosine 3-monooxygenase/tryptophan 5-monooxygenase activation protein, eta polypeptide                                                     | Homo sapiens |
| 171389 | NLR family, pyrin domain containing 6                                                                                                       | Homo sapiens |
| 84722  | proline/serine-rich coiled-coil 1                                                                                                           | Homo sapiens |
| 2150   | coagulation factor II (thrombin) receptor-like 1                                                                                            | Homo sapiens |
| 55421  | chromosome 17 open reading frame 85                                                                                                         | Homo sapiens |
| 6228   | ribosomal protein S23                                                                                                                       | Homo sapiens |
| 90850  | zinc finger protein 598                                                                                                                     | Homo sapiens |
| 9219   | metastasis associated 1 family, member 2                                                                                                    | Homo sapiens |
| 4209   | myocyte enhancer factor 2D                                                                                                                  | Homo sapiens |
| 8826   | IQ motif containing GTPase activating protein 1                                                                                             | Homo sapiens |
| 8471   | insulin receptor substrate 4                                                                                                                | Homo sapiens |
| 729799 | SEC14-like 1 (S. cerevisiae); SEC14-like 1 pseudogene                                                                                       | Homo sapiens |
| 6397   | SEC14-like 1 (S. cerevisiae); SEC14-like 1 pseudogene                                                                                       | Homo sapiens |
| 401136 | similar to RIKEN cDNA 9930019B18 gene                                                                                                       | Homo sapiens |
| 1982   | eukaryotic translation initiation factor 4 gamma, 2                                                                                         | Homo sapiens |
| 54954  | family with sequence similarity 120C                                                                                                        | Homo sapiens |
| 122830 | N-acetyltransferase 12 (GCN5-related, putative)                                                                                             | Homo sapiens |
| 8535   | chromobox homolog 4 (Pc class homolog, Drosophila)                                                                                          | Homo sapiens |
| 28998  | mitochondrial ribosomal protein L13                                                                                                         | Homo sapiens |
| 9037   | sema domain, seven thrombospondin repeats (type 1 and type 1-like), transmembrane domain (TM) and short cytoplasmic domain, (semaphorin) 5A | Homo sapiens |
| 91445  | ring finger protein 185                                                                                                                     | Homo sapiens |
| 382    | ADP-ribosylation factor 6                                                                                                                   | Homo sapiens |
| 9052   | G protein-coupled receptor, family C, group 5, member A                                                                                     | Homo sapiens |
| 7494   | X-box binding protein 1                                                                                                                     | Homo sapiens |
| 338645 | leucine zipper protein 2                                                                                                                    | Homo sapiens |
| 94005  | phosphatidylinositol glycan anchor biosynthesis, class S                                                                                    | Homo sapiens |
| 54939  | COMM domain containing 4                                                                                                                    | Homo sapiens |
| 79047  | potassium channel tetramerisation domain containing 15                                                                                      | Homo sapiens |
| 8892   | eukaryotic translation initiation factor 2B, subunit 2 beta, 39kDa                                                                          | Homo sapiens |
| 120935 | coiled-coil domain containing 38                                                                                                            | Homo sapiens |
| 389677 | RNA binding motif protein 12B                                                                                                               | Homo sapiens |
| 348654 | Gen homolog 1, endonuclease (Drosophila)                                                                                                    | Homo sapiens |
| 51704  | G protein-coupled receptor, family C, group 5, member B                                                                                     | Homo sapiens |
| 440730 | tripartite motif-containing 67                                                                                                              | Homo sapiens |
| 353132 | late cornified envelope 1B                                                                                                                  | Homo sapiens |
| 9530   | BCL2-associated athanogene 4                                                                                                                | Homo sapiens |
| 3091   | hypoxia inducible factor 1, alpha subunit (basic helix-loop-helix transcription factor)                                                     | Homo sapiens |
| 55450  | calcium/calmodulin-dependent protein kinase II inhibitor 1                                                                                  | Homo sapiens |
| 2028   | glutamyl aminopeptidase (aminopeptidase A)                                                                                                  | Homo sapiens |
| 23085  | ELKS/RAB6-interacting/CAST family member 1                                                                                                  | Homo sapiens |
| 488    | ATPase, Ca <sup>++</sup> transporting, cardiac muscle, slow twitch 2                                                                        | Homo sapiens |
| 29780  | parvin, beta                                                                                                                                | Homo sapiens |
| 375323 | lipoma HMGIC fusion partner-like 4                                                                                                          | Homo sapiens |
| 84735  | carnosine dipeptidase 1 (metallopeptidase M20 family)                                                                                       | Homo sapiens |
| 728505 | WD repeat domain 82 pseudogene 1                                                                                                            | Homo sapiens |
| 64777  | required for meiotic nuclear division 5 homolog B (S. cerevisiae)                                                                           | Homo sapiens |
| 55653  | breast carcinoma amplified sequence 4                                                                                                       | Homo sapiens |
| 28511  | NFKB inhibitor interacting Ras-like 2                                                                                                       | Homo sapiens |
| 23062  | golgi associated, gamma adaptin ear containing, ARF binding protein 2                                                                       | Homo sapiens |
| 23353  | unc-84 homolog A (C. elegans)                                                                                                               | Homo sapiens |
| 55544  | RNA binding motif protein 38                                                                                                                | Homo sapiens |
| 4094   | v-maf musculoaponeurotic fibrosarcoma oncogene homolog (avian)                                                                              | Homo sapiens |
| 11179  | zinc finger protein 277                                                                                                                     | Homo sapiens |
| 4739   | neural precursor cell expressed, developmentally down-regulated 9                                                                           | Homo sapiens |
| 91746  | YTH domain containing 1                                                                                                                     | Homo sapiens |
| 284406 | zinc finger protein 82 homolog (mouse)                                                                                                      | Homo sapiens |
| 116931 | mediator complex subunit 12-like                                                                                                            | Homo sapiens |
| 323    | amyloid beta (A4) precursor protein-binding, family B, member 2                                                                             | Homo sapiens |
| 10660  | ladybird homeobox 1                                                                                                                         | Homo sapiens |
| 10523  | calcium homeostasis endoplasmic reticulum protein                                                                                           | Homo sapiens |
| 23621  | beta-site APP-cleaving enzyme 1                                                                                                             | Homo sapiens |
| 6249   | CAP-GLY domain containing linker protein 1                                                                                                  | Homo sapiens |
| 7520   | X-ray repair complementing defective repair in Chinese hamster cells 5 (double-strand-break rejoining)                                      | Homo sapiens |
| 11273  | ataxin 2-like                                                                                                                               | Homo sapiens |
| 51533  | PHD finger protein 7                                                                                                                        | Homo sapiens |
| 83593  | Ras association (RalGDS/AF-6) domain family member 5                                                                                        | Homo sapiens |
| 22900  | caspase recruitment domain family, member 8                                                                                                 | Homo sapiens |
| 55178  | RNA methyltransferase like 1                                                                                                                | Homo sapiens |
| 23136  | erythrocyte membrane protein band 4.1-like 3                                                                                                | Homo sapiens |
| 9055   | protein regulator of cytokinesis 1                                                                                                          | Homo sapiens |
| 63943  | FK506 binding protein like                                                                                                                  | Homo sapiens |
| 55609  | zinc finger protein 280C                                                                                                                    | Homo sapiens |
| 55636  | chromodomain helicase DNA binding protein 7                                                                                                 | Homo sapiens |



|        |                                                                                                                                                    |              |
|--------|----------------------------------------------------------------------------------------------------------------------------------------------------|--------------|
| 9949   | Alport syndrome, mental retardation, midface hypoplasia and elliptocytosis chromosomal region gene 1                                               | Homo sapiens |
| 154214 | ring finger protein 217                                                                                                                            | Homo sapiens |
| 10580  | sorbin and SH3 domain containing 1                                                                                                                 | Homo sapiens |
| 2180   | acyl-CoA synthetase long-chain family member 1                                                                                                     | Homo sapiens |
| 9919   | SEC16 homolog A ( <i>S. cerevisiae</i> )                                                                                                           | Homo sapiens |
| 83737  | itchy E3 ubiquitin protein ligase homolog (mouse)                                                                                                  | Homo sapiens |
| 10972  | transmembrane emp24-like trafficking protein 10 (yeast)                                                                                            | Homo sapiens |
| 83540  | NUF2, NDC80 kinetochore complex component, homolog ( <i>S. cerevisiae</i> )                                                                        | Homo sapiens |
| 23609  | makorin ring finger protein 2                                                                                                                      | Homo sapiens |
| 6319   | stearoyl-CoA desaturase (delta-9-desaturase)                                                                                                       | Homo sapiens |
| 1942   | ephrin-A1                                                                                                                                          | Homo sapiens |
| 729438 | GATS protein-like 2                                                                                                                                | Homo sapiens |
| 26502  | nuclear prelamin A recognition factor                                                                                                              | Homo sapiens |
| 10983  | cyclin I                                                                                                                                           | Homo sapiens |
| 29959  | nuclear receptor binding protein 1                                                                                                                 | Homo sapiens |
| 23534  | transportin 3                                                                                                                                      | Homo sapiens |
| 57570  | TRM5 tRNA methyltransferase 5 homolog ( <i>S. cerevisiae</i> )                                                                                     | Homo sapiens |
| 124590 | Usher syndrome 1G (autosomal recessive)                                                                                                            | Homo sapiens |
| 2778   | GNAS complex locus                                                                                                                                 | Homo sapiens |
| 9242   | musculin (activated B-cell factor-1)                                                                                                               | Homo sapiens |
| 54796  | basonuclin 2                                                                                                                                       | Homo sapiens |
| 7772   | zinc finger protein 229                                                                                                                            | Homo sapiens |
| 10975  | ubiquinol-cytochrome c reductase, 6.4kDa subunit                                                                                                   | Homo sapiens |
| 10724  | meningioma expressed antigen 5 (hyaluronidase)                                                                                                     | Homo sapiens |
| 8289   | AT rich interactive domain 1A (SWI-like)                                                                                                           | Homo sapiens |
| 602    | B-cell CLL/lymphoma 3                                                                                                                              | Homo sapiens |
| 81562  | lectin, mannose-binding 2-like                                                                                                                     | Homo sapiens |
| 153129 | solute carrier family 38, member 9                                                                                                                 | Homo sapiens |
| 29083  | GTP-binding protein 8 (putative)                                                                                                                   | Homo sapiens |
| 4152   | methyl-CpG binding domain protein 1                                                                                                                | Homo sapiens |
| 55966  | adherens junctions associated protein 1                                                                                                            | Homo sapiens |
| 7572   | zinc finger protein 24                                                                                                                             | Homo sapiens |
| 51517  | NCK interacting protein with SH3 domain                                                                                                            | Homo sapiens |
| 285440 | cytochrome P450, family 4, subfamily V, polypeptide 2                                                                                              | Homo sapiens |
| 63941  | N-terminal EF-hand calcium binding protein 3                                                                                                       | Homo sapiens |
| 6526   | solute carrier family 5 (sodium/myo-inositol cotransporter), member 3                                                                              | Homo sapiens |
| 4343   | Mov10, Moloney leukemia virus 10, homolog (mouse)                                                                                                  | Homo sapiens |
| 3550   | similar to CG18005; IK cytokine, down-regulator of HLA II                                                                                          | Homo sapiens |
| 644456 | similar to CG18005; IK cytokine, down-regulator of HLA II                                                                                          | Homo sapiens |
| 7739   | zinc finger protein 185 (LIM domain)                                                                                                               | Homo sapiens |
| 23237  | activity-regulated cytoskeleton-associated protein                                                                                                 | Homo sapiens |
| 55349  | choline dehydrogenase                                                                                                                              | Homo sapiens |
| 3215   | homeobox B5                                                                                                                                        | Homo sapiens |
| 93349  | SP140 nuclear body protein-like                                                                                                                    | Homo sapiens |
| 117145 | thioesterase superfamily member 4                                                                                                                  | Homo sapiens |
| 2644   | GTP cyclohydrolase I feedback regulator                                                                                                            | Homo sapiens |
| 4193   | Mdm2 p53 binding protein homolog (mouse)                                                                                                           | Homo sapiens |
| 2475   | mechanistic target of rapamycin (serine/threonine kinase)                                                                                          | Homo sapiens |
| 493    | ATPase, Ca <sup>++</sup> transporting, plasma membrane 4                                                                                           | Homo sapiens |
| 644914 | H3 histone, family 3B (H3.3B); H3 histone, family 3A pseudogene; H3 histone, family 3A; similar to H3 histone, family 3B; similar to histone H3.3B | Homo sapiens |
| 3020   | H3 histone, family 3B (H3.3B); H3 histone, family 3A pseudogene; H3 histone, family 3A; similar to H3 histone, family 3B; similar to histone H3.3B | Homo sapiens |
| 440926 | H3 histone, family 3B (H3.3B); H3 histone, family 3A pseudogene; H3 histone, family 3A; similar to H3 histone, family 3B; similar to histone H3.3B | Homo sapiens |
| 3021   | H3 histone, family 3B (H3.3B); H3 histone, family 3A pseudogene; H3 histone, family 3A; similar to H3 histone, family 3B; similar to histone H3.3B | Homo sapiens |
| 728914 | H3 histone, family 3B (H3.3B); H3 histone, family 3A pseudogene; H3 histone, family 3A; similar to H3 histone, family 3B; similar to histone H3.3B | Homo sapiens |
| 29934  | sorting nexin 12                                                                                                                                   | Homo sapiens |
| 5886   | RAD23 homolog A ( <i>S. cerevisiae</i> )                                                                                                           | Homo sapiens |
| 6602   | SWI/SNF related, matrix associated, actin dependent regulator of chromatin, subfamily d, member 1                                                  | Homo sapiens |
| 5879   | ras-related C3 botulinum toxin substrate 1 (rho family, small GTP binding protein Rac1)                                                            | Homo sapiens |
| 54682  | MANSC domain containing 1                                                                                                                          | Homo sapiens |
| 11170  | family with sequence similarity 107, member A                                                                                                      | Homo sapiens |
| 57677  | zinc finger protein 14 homolog (mouse)                                                                                                             | Homo sapiens |
| 5862   | RAB2A, member RAS oncogene family                                                                                                                  | Homo sapiens |
| 6184   | ribophorin I                                                                                                                                       | Homo sapiens |
| 9715   | family with sequence similarity 131, member B                                                                                                      | Homo sapiens |
| 5447   | P450 (cytochrome) oxidoreductase                                                                                                                   | Homo sapiens |
| 143244 | eukaryotic translation initiation factor 5A; eukaryotic translation initiation factor 5A-like 1                                                    | Homo sapiens |
| 1984   | eukaryotic translation initiation factor 5A; eukaryotic translation initiation factor 5A-like 1                                                    | Homo sapiens |
| 6446   | serum/glucocorticoid regulated kinase 1                                                                                                            | Homo sapiens |
| 79856  | sorting nexin 22                                                                                                                                   | Homo sapiens |
| 26136  | testis derived transcript (3 LIM domains)                                                                                                          | Homo sapiens |

|           |                                                                                                                                                                              |              |
|-----------|------------------------------------------------------------------------------------------------------------------------------------------------------------------------------|--------------|
| 118       | adducin 1 (alpha)                                                                                                                                                            | Homo sapiens |
| 165324    | UBX domain protein 2A                                                                                                                                                        | Homo sapiens |
| 55106     | schlafen family member 12                                                                                                                                                    | Homo sapiens |
| 6230      | ribosomal protein S25 pseudogene 8; ribosomal protein S25                                                                                                                    | Homo sapiens |
| 100131196 | ribosomal protein S25 pseudogene 8; ribosomal protein S25                                                                                                                    | Homo sapiens |
| 5167      | ectonucleotide pyrophosphatase/phosphodiesterase 1                                                                                                                           | Homo sapiens |
| 79847     | transmembrane protein 180                                                                                                                                                    | Homo sapiens |
| 5754      | PTK7 protein tyrosine kinase 7                                                                                                                                               | Homo sapiens |
| 23093     | tubulin tyrosine ligase-like family, member 5                                                                                                                                | Homo sapiens |
| 255324    | epithelial mitogen homolog (mouse)                                                                                                                                           | Homo sapiens |
| 23261     | calmodulin binding transcription activator 1                                                                                                                                 | Homo sapiens |
| 151648    | shugoshin-like 1 (S. pombe)                                                                                                                                                  | Homo sapiens |
| 3014      | H2A histone family, member X                                                                                                                                                 | Homo sapiens |
| 5133      | programmed cell death 1                                                                                                                                                      | Homo sapiens |
| 1937      | eukaryotic translation elongation factor 1 gamma                                                                                                                             | Homo sapiens |
| 51078     | THAP domain containing 4                                                                                                                                                     | Homo sapiens |
| 4001      | lamin B1                                                                                                                                                                     | Homo sapiens |
| 2296      | forkhead box C1                                                                                                                                                              | Homo sapiens |
| 148753    | family with sequence similarity 163, member A                                                                                                                                | Homo sapiens |
| 10133     | optineurin                                                                                                                                                                   | Homo sapiens |
| 51455     | REV1 homolog (S. cerevisiae)                                                                                                                                                 | Homo sapiens |
| 729009    | ferritin, heavy polypeptide 1; ferritin, heavy polypeptide-like 16; similar to ferritin, heavy polypeptide 1; ferritin, heavy polypeptide-like 3 pseudogene                  | Homo sapiens |
| 2508      | ferritin, heavy polypeptide 1; ferritin, heavy polypeptide-like 16; similar to ferritin, heavy polypeptide 1; ferritin, heavy polypeptide-like 3 pseudogene                  | Homo sapiens |
| 2495      | ferritin, heavy polypeptide 1; ferritin, heavy polypeptide-like 16; similar to ferritin, heavy polypeptide 1; ferritin, heavy polypeptide-like 3 pseudogene                  | Homo sapiens |
| 2498      | ferritin, heavy polypeptide 1; ferritin, heavy polypeptide-like 16; similar to ferritin, heavy polypeptide 1; ferritin, heavy polypeptide-like 3 pseudogene                  | Homo sapiens |
| 81929     | SEH1-like (S. cerevisiae)                                                                                                                                                    | Homo sapiens |
| 2664      | GDP dissociation inhibitor 1                                                                                                                                                 | Homo sapiens |
| 55092     | transmembrane protein 51                                                                                                                                                     | Homo sapiens |
| 23633     | karyopherin alpha 6 (importin alpha 7)                                                                                                                                       | Homo sapiens |
| 11345     | GABA(A) receptor-associated protein-like 2                                                                                                                                   | Homo sapiens |
| 4143      | methionine adenosyltransferase I, alpha                                                                                                                                      | Homo sapiens |
| 55720     | TSR1, 20S rRNA accumulation, homolog (S. cerevisiae)                                                                                                                         | Homo sapiens |
| 344787    | zinc finger protein 860                                                                                                                                                      | Homo sapiens |
| 4716      | NADH dehydrogenase (ubiquinone) 1 beta subcomplex, 10, 22kDa                                                                                                                 | Homo sapiens |
| 7284      | Tu translation elongation factor, mitochondrial                                                                                                                              | Homo sapiens |
| 1579      | cytochrome P450, family 4, subfamily A, polypeptide 11                                                                                                                       | Homo sapiens |
| 79071     | ELOVL family member 6, elongation of long chain fatty acids (FEN1/Elo2, SUR4/Elo3-like, yeast)                                                                               | Homo sapiens |
| 6386      | syndecan binding protein (syntenin)                                                                                                                                          | Homo sapiens |
| 24144     | tuftelin interacting protein 11                                                                                                                                              | Homo sapiens |
| 29070     | coiled-coil domain containing 113                                                                                                                                            | Homo sapiens |
| 64091     | popeye domain containing 2                                                                                                                                                   | Homo sapiens |
| 91663     | myeloid-associated differentiation marker                                                                                                                                    | Homo sapiens |
| 142940    | TruB pseudouridine (psi) synthase homolog 1 (E. coli)                                                                                                                        | Homo sapiens |
| 659       | bone morphogenetic protein receptor, type II (serine/threonine kinase)                                                                                                       | Homo sapiens |
| 2002      | ELK1, member of ETS oncogene family                                                                                                                                          | Homo sapiens |
| 728658    | ribosomal protein L13a pseudogene 7; ribosomal protein L13a pseudogene 5; ribosomal protein L13a pseudogene 16; ribosomal protein L13a; ribosomal protein L13a pseudogene 18 | Homo sapiens |
| 284821    | ribosomal protein L13a pseudogene 7; ribosomal protein L13a pseudogene 5; ribosomal protein L13a pseudogene 16; ribosomal protein L13a; ribosomal protein L13a pseudogene 18 | Homo sapiens |
| 23521     | ribosomal protein L13a pseudogene 7; ribosomal protein L13a pseudogene 5; ribosomal protein L13a pseudogene 16; ribosomal protein L13a; ribosomal protein L13a pseudogene 18 | Homo sapiens |
| 100129553 | ribosomal protein L13a pseudogene 7; ribosomal protein L13a pseudogene 5; ribosomal protein L13a pseudogene 16; ribosomal protein L13a; ribosomal protein L13a pseudogene 18 | Homo sapiens |
| 402342    | ribosomal protein L13a pseudogene 7; ribosomal protein L13a pseudogene 5; ribosomal protein L13a pseudogene 16; ribosomal protein L13a; ribosomal protein L13a pseudogene 18 | Homo sapiens |
| 29108     | PYD and CARD domain containing                                                                                                                                               | Homo sapiens |
| 83552     | membrane frizzled-related protein                                                                                                                                            | Homo sapiens |
| 5584      | protein kinase C, iota                                                                                                                                                       | Homo sapiens |
| 1836      | solute carrier family 26 (sulfate transporter), member 2                                                                                                                     | Homo sapiens |
| 9445      | integral membrane protein 2B                                                                                                                                                 | Homo sapiens |
| 84188     | fatty acyl CoA reductase 1                                                                                                                                                   | Homo sapiens |
| 3777      | potassium channel, subfamily K, member 3                                                                                                                                     | Homo sapiens |
| 27286     | sushi-repeat-containing protein, X-linked 2                                                                                                                                  | Homo sapiens |
| 654350    | ribosomal protein L9; ribosomal protein L9 pseudogene 25                                                                                                                     | Homo sapiens |
| 6133      | ribosomal protein L9; ribosomal protein L9 pseudogene 25                                                                                                                     | Homo sapiens |
| 8031      | nuclear receptor coactivator 4                                                                                                                                               | Homo sapiens |
| 63891     | ring finger protein 123                                                                                                                                                      | Homo sapiens |
| 4629      | myosin, heavy chain 11, smooth muscle                                                                                                                                        | Homo sapiens |
| 8861      | LIM domain binding 1                                                                                                                                                         | Homo sapiens |
| 56954     | nitrilase family, member 2                                                                                                                                                   | Homo sapiens |
| 8872      | cell division cycle 123 homolog (S. cerevisiae)                                                                                                                              | Homo sapiens |
| 146857    | schlafen family member 13                                                                                                                                                    | Homo sapiens |
| 100129743 | ribosomal protein L7-like 1; ribosomal protein L7 pseudogene 14; ribosomal protein L7 pseudogene 21; ribosomal protein L7 pseudogene 22; ribosomal protein L7 pseudogene 46  | Homo sapiens |

|           |                                                                                                                                                                             |              |
|-----------|-----------------------------------------------------------------------------------------------------------------------------------------------------------------------------|--------------|
| 642451    | ribosomal protein L7-like 1; ribosomal protein L7 pseudogene 14; ribosomal protein L7 pseudogene 21; ribosomal protein L7 pseudogene 22; ribosomal protein L7 pseudogene 46 | Homo sapiens |
| 285855    | ribosomal protein L7-like 1; ribosomal protein L7 pseudogene 14; ribosomal protein L7 pseudogene 21; ribosomal protein L7 pseudogene 22; ribosomal protein L7 pseudogene 46 | Homo sapiens |
| 729123    | ribosomal protein L7-like 1; ribosomal protein L7 pseudogene 14; ribosomal protein L7 pseudogene 21; ribosomal protein L7 pseudogene 22; ribosomal protein L7 pseudogene 46 | Homo sapiens |
| 728620    | ribosomal protein L7-like 1; ribosomal protein L7 pseudogene 14; ribosomal protein L7 pseudogene 21; ribosomal protein L7 pseudogene 22; ribosomal protein L7 pseudogene 46 | Homo sapiens |
| 84923     | family with sequence similarity 104, member A                                                                                                                               | Homo sapiens |
| 3184      | heterogeneous nuclear ribonucleoprotein D (AU-rich element RNA binding protein 1, 37kDa)                                                                                    | Homo sapiens |
| 57402     | S100 calcium binding protein A14                                                                                                                                            | Homo sapiens |
| 221294    | 5'-nucleotidase domain containing 1                                                                                                                                         | Homo sapiens |
| 30062     | retina and anterior neural fold homeobox                                                                                                                                    | Homo sapiens |
| 6925      | transcription factor 4                                                                                                                                                      | Homo sapiens |
| 23362     | pleckstrin and Sec7 domain containing 3                                                                                                                                     | Homo sapiens |
| 4223      | mesenchyme homeobox 2                                                                                                                                                       | Homo sapiens |
| 26043     | UBX domain protein 7                                                                                                                                                        | Homo sapiens |
| 10421     | CD2 (cytoplasmic tail) binding protein 2                                                                                                                                    | Homo sapiens |
| 54751     | filamin binding LIM protein 1                                                                                                                                               | Homo sapiens |
| 8331      | histone cluster 1, H2aj                                                                                                                                                     | Homo sapiens |
| 81579     | phospholipase A2, group XIIA                                                                                                                                                | Homo sapiens |
| 829       | capping protein (actin filament) muscle Z-line, alpha 1                                                                                                                     | Homo sapiens |
| 641522    | ADP-ribosylation factor-like 17 pseudogene 1; ADP-ribosylation factor-like 17                                                                                               | Homo sapiens |
| 51326     | ADP-ribosylation factor-like 17 pseudogene 1; ADP-ribosylation factor-like 17                                                                                               | Homo sapiens |
| 4756      | neogenin homolog 1 (chicken)                                                                                                                                                | Homo sapiens |
| 92154     | metastasis suppressor 1-like                                                                                                                                                | Homo sapiens |
| 29915     | host cell factor C2                                                                                                                                                         | Homo sapiens |
| 5033      | prolyl 4-hydroxylase, alpha polypeptide I                                                                                                                                   | Homo sapiens |
| 10749     | kinesin family member 1C                                                                                                                                                    | Homo sapiens |
| 201164    | phospholipase D family, member 6                                                                                                                                            | Homo sapiens |
| 3954      | leucine zipper-EF-hand containing transmembrane protein 1                                                                                                                   | Homo sapiens |
| 6810      | syntaxin 4                                                                                                                                                                  | Homo sapiens |
| 9978      | ring-box 1                                                                                                                                                                  | Homo sapiens |
| 6548      | solute carrier family 9 (sodium/hydrogen exchanger), member 1                                                                                                               | Homo sapiens |
| 201294    | unc-13 homolog D (C. elegans)                                                                                                                                               | Homo sapiens |
| 6929      | transcription factor 3 (E2A immunoglobulin enhancer binding factors E12/E47)                                                                                                | Homo sapiens |
| 25976     | TCDD-inducible poly(ADP-ribose) polymerase                                                                                                                                  | Homo sapiens |
| 79924     | adrenomedullin 2                                                                                                                                                            | Homo sapiens |
| 9668      | zinc finger protein 432                                                                                                                                                     | Homo sapiens |
| 23476     | bromodomain containing 4                                                                                                                                                    | Homo sapiens |
| 10025     | mediator complex subunit 16                                                                                                                                                 | Homo sapiens |
| 9647      | protein phosphatase 1F (PP2C domain containing)                                                                                                                             | Homo sapiens |
| 10135     | nicotinamide phosphoribosyltransferase                                                                                                                                      | Homo sapiens |
| 7182      | nuclear receptor subfamily 2, group C, member 2                                                                                                                             | Homo sapiens |
| 957       | ectonucleoside triphosphate diphosphohydrolase 5                                                                                                                            | Homo sapiens |
| 392335    | similar to acetyl-Coenzyme A acyltransferase 2 (mitochondrial 3-oxoacyl-Coenzyme A thiolase); similar to KIAA1119 protein; myosin VB                                        | Homo sapiens |
| 441420    | similar to acetyl-Coenzyme A acyltransferase 2 (mitochondrial 3-oxoacyl-Coenzyme A thiolase); similar to KIAA1119 protein; myosin VB                                        | Homo sapiens |
| 4645      | similar to acetyl-Coenzyme A acyltransferase 2 (mitochondrial 3-oxoacyl-Coenzyme A thiolase); similar to KIAA1119 protein; myosin VB                                        | Homo sapiens |
| 27250     | programmed cell death 4 (neoplastic transformation inhibitor)                                                                                                               | Homo sapiens |
| 389342    | ribosomal protein L10; ribosomal protein L10 pseudogene 15; ribosomal protein L10 pseudogene 6; ribosomal protein L10 pseudogene 16; ribosomal protein L10 pseudogene 9     | Homo sapiens |
| 6134      | ribosomal protein L10; ribosomal protein L10 pseudogene 15; ribosomal protein L10 pseudogene 6; ribosomal protein L10 pseudogene 16; ribosomal protein L10 pseudogene 9     | Homo sapiens |
| 100129975 | ribosomal protein L10; ribosomal protein L10 pseudogene 15; ribosomal protein L10 pseudogene 6; ribosomal protein L10 pseudogene 16; ribosomal protein L10 pseudogene 9     | Homo sapiens |
| 284393    | ribosomal protein L10; ribosomal protein L10 pseudogene 15; ribosomal protein L10 pseudogene 6; ribosomal protein L10 pseudogene 16; ribosomal protein L10 pseudogene 9     | Homo sapiens |
| 285176    | ribosomal protein L10; ribosomal protein L10 pseudogene 15; ribosomal protein L10 pseudogene 6; ribosomal protein L10 pseudogene 16; ribosomal protein L10 pseudogene 9     | Homo sapiens |
| 151888    | B and T lymphocyte associated                                                                                                                                               | Homo sapiens |
| 151354    | hypothetical LOC653602; family with sequence similarity 84, member A                                                                                                        | Homo sapiens |
| 653602    | hypothetical LOC653602; family with sequence similarity 84, member A                                                                                                        | Homo sapiens |
| 23678     | serum/glucocorticoid regulated kinase family, member 3                                                                                                                      | Homo sapiens |
| 55700     | MAP7 domain containing 1                                                                                                                                                    | Homo sapiens |
| 6239      | ras responsive element binding protein 1                                                                                                                                    | Homo sapiens |
| 221178    | spermatogenesis associated 13                                                                                                                                               | Homo sapiens |
| 55325     | UFM1-specific peptidase 2                                                                                                                                                   | Homo sapiens |
| 94103     | ORM1-like 3 (S. cerevisiae)                                                                                                                                                 | Homo sapiens |
| 2151      | coagulation factor II (thrombin) receptor-like 2                                                                                                                            | Homo sapiens |
| 652634    | fem-1 homolog a (C. elegans); similar to fem-1 homolog a (C.elegans); similar to fem-1 homolog a                                                                            | Homo sapiens |
| 55527     | fem-1 homolog a (C. elegans); similar to fem-1 homolog a (C.elegans); similar to fem-1 homolog a                                                                            | Homo sapiens |
| 390834    | fem-1 homolog a (C. elegans); similar to fem-1 homolog a (C.elegans); similar to fem-1 homolog a                                                                            | Homo sapiens |
| 1850      | dual specificity phosphatase 8                                                                                                                                              | Homo sapiens |

|           |                                                                                                                                                                                                                                                            |              |
|-----------|------------------------------------------------------------------------------------------------------------------------------------------------------------------------------------------------------------------------------------------------------------|--------------|
| 5795      | protein tyrosine phosphatase, receptor type, J                                                                                                                                                                                                             | Homo sapiens |
| 79933     | synaptopodin 2-like                                                                                                                                                                                                                                        | Homo sapiens |
| 8260      | ARD1 homolog A, N-acetyltransferase ( <i>S. cerevisiae</i> )                                                                                                                                                                                               | Homo sapiens |
| 338328    | glycosylphosphatidylinositol anchored high density lipoprotein binding protein 1                                                                                                                                                                           | Homo sapiens |
| 4361      | MRE11 meiotic recombination 11 homolog A ( <i>S. cerevisiae</i> )                                                                                                                                                                                          | Homo sapiens |
| 100129086 | similar to HIG1 domain family, member 1A; HIG1 hypoxia inducible domain family, member 1A; HIG1 hypoxia inducible domain family, member 1D                                                                                                                 | Homo sapiens |
| 25994     | similar to HIG1 domain family, member 1A; HIG1 hypoxia inducible domain family, member 1A; HIG1 hypoxia inducible domain family, member 1D                                                                                                                 | Homo sapiens |
| 100130383 | similar to HIG1 domain family, member 1A; HIG1 hypoxia inducible domain family, member 1A; HIG1 hypoxia inducible domain family, member 1D                                                                                                                 | Homo sapiens |
| 29942     | purine-rich element binding protein G                                                                                                                                                                                                                      | Homo sapiens |
| 124245    | zinc finger CCCH-type containing 18                                                                                                                                                                                                                        | Homo sapiens |
| 23286     | WW and C2 domain containing 1                                                                                                                                                                                                                              | Homo sapiens |
| 79828     | methyltransferase like 8                                                                                                                                                                                                                                   | Homo sapiens |
| 221830    | TWIST neighbor                                                                                                                                                                                                                                             | Homo sapiens |
| 8034      | solute carrier family 25 (mitochondrial carrier; Graves disease autoantigen), member 16                                                                                                                                                                    | Homo sapiens |
| 389873    | selenophosphate synthetase 1; similar to selenophosphate synthetase 1                                                                                                                                                                                      | Homo sapiens |
| 22929     | selenophosphate synthetase 1; similar to selenophosphate synthetase 1                                                                                                                                                                                      | Homo sapiens |
| 7170      | tropomyosin 3                                                                                                                                                                                                                                              | Homo sapiens |
| 117247    | solute carrier family 16, member 10 (aromatic amino acid transporter)                                                                                                                                                                                      | Homo sapiens |
| 89882     | tumor protein D52-like 3                                                                                                                                                                                                                                   | Homo sapiens |
| 6310      | ataxin 1                                                                                                                                                                                                                                                   | Homo sapiens |
| 2289      | FK506 binding protein 5                                                                                                                                                                                                                                    | Homo sapiens |
| 57614     | KIAA1468                                                                                                                                                                                                                                                   | Homo sapiens |
| 5501      | protein phosphatase 1, catalytic subunit, gamma isoform                                                                                                                                                                                                    | Homo sapiens |
| 9001      | huntingtin-associated protein 1                                                                                                                                                                                                                            | Homo sapiens |
| 55783     | FtsJ methyltransferase domain containing 1                                                                                                                                                                                                                 | Homo sapiens |
| 59345     | guanine nucleotide binding protein (G protein), beta polypeptide 4                                                                                                                                                                                         | Homo sapiens |
| 51100     | SH3-domain GRB2-like endophilin B1                                                                                                                                                                                                                         | Homo sapiens |
| 440503    | lipid storage droplet protein 5                                                                                                                                                                                                                            | Homo sapiens |
| 284459    | GLI-Kruppel family member HKR1                                                                                                                                                                                                                             | Homo sapiens |
| 3654      | interleukin-1 receptor-associated kinase 1                                                                                                                                                                                                                 | Homo sapiens |
| 285053    | ribosomal protein L18a pseudogene 6; ribosomal protein L18a                                                                                                                                                                                                | Homo sapiens |
| 6142      | ribosomal protein L18a pseudogene 6; ribosomal protein L18a                                                                                                                                                                                                | Homo sapiens |
| 1666      | 2,4-dienoyl CoA reductase 1, mitochondrial                                                                                                                                                                                                                 | Homo sapiens |
| 10525     | hypoxia up-regulated 1                                                                                                                                                                                                                                     | Homo sapiens |
| 6934      | transcription factor 7-like 2 (T-cell specific, HMG-box)                                                                                                                                                                                                   | Homo sapiens |
| 7046      | transforming growth factor, beta receptor 1                                                                                                                                                                                                                | Homo sapiens |
| 6416      | mitogen-activated protein kinase kinase 4                                                                                                                                                                                                                  | Homo sapiens |
| 51351     | zinc finger protein 117                                                                                                                                                                                                                                    | Homo sapiens |
| 283106    | casein kinase 2, alpha 1 polypeptide pseudogene; casein kinase 2, alpha 1 polypeptide                                                                                                                                                                      | Homo sapiens |
| 1457      | casein kinase 2, alpha 1 polypeptide pseudogene; casein kinase 2, alpha 1 polypeptide                                                                                                                                                                      | Homo sapiens |
| 5168      | ectonucleotide pyrophosphatase/phosphodiesterase 2                                                                                                                                                                                                         | Homo sapiens |
| 400       | ADP-ribosylation factor-like 1                                                                                                                                                                                                                             | Homo sapiens |
| 6273      | S100 calcium binding protein A2                                                                                                                                                                                                                            | Homo sapiens |
| 11119     | butyrophilin, subfamily 3, member A1                                                                                                                                                                                                                       | Homo sapiens |
| 8030      | coiled-coil domain containing 6                                                                                                                                                                                                                            | Homo sapiens |
| 1164      | CDC28 protein kinase regulatory subunit 2                                                                                                                                                                                                                  | Homo sapiens |
| 5214      | phosphofructokinase, platelet                                                                                                                                                                                                                              | Homo sapiens |
| 6542      | solute carrier family 7 (cationic amino acid transporter, y+ system), member 2                                                                                                                                                                             | Homo sapiens |
| 55165     | centrosomal protein 55kDa                                                                                                                                                                                                                                  | Homo sapiens |
| 23650     | tripartite motif-containing 29                                                                                                                                                                                                                             | Homo sapiens |
| 6992      | protein phosphatase 1, regulatory (inhibitor) subunit 11                                                                                                                                                                                                   | Homo sapiens |
| 10398     | myosin, light chain 9, regulatory                                                                                                                                                                                                                          | Homo sapiens |
| 11128     | polymerase (RNA) III (DNA directed) polypeptide A, 155kDa                                                                                                                                                                                                  | Homo sapiens |
| 728418    | POM121 membrane glycoprotein-like 7 (rat); POM121 membrane glycoprotein-like 4 pseudogene (rat); POM121 membrane glycoprotein-like 3 (rat) pseudogene; POM121 membrane glycoprotein-like 10 (rat) pseudogene; similar to nuclear pore membrane protein 121 | Homo sapiens |
| 266697    | POM121 membrane glycoprotein-like 7 (rat); POM121 membrane glycoprotein-like 4 pseudogene (rat); POM121 membrane glycoprotein-like 3 (rat) pseudogene; POM121 membrane glycoprotein-like 10 (rat) pseudogene; similar to nuclear pore membrane protein 121 | Homo sapiens |
| 727983    | POM121 membrane glycoprotein-like 7 (rat); POM121 membrane glycoprotein-like 4 pseudogene (rat); POM121 membrane glycoprotein-like 3 (rat) pseudogene; POM121 membrane glycoprotein-like 10 (rat) pseudogene; similar to nuclear pore membrane protein 121 | Homo sapiens |
| 651452    | POM121 membrane glycoprotein-like 7 (rat); POM121 membrane glycoprotein-like 4 pseudogene (rat); POM121 membrane glycoprotein-like 3 (rat) pseudogene; POM121 membrane glycoprotein-like 10 (rat) pseudogene; similar to nuclear pore membrane protein 121 | Homo sapiens |
| 646074    | POM121 membrane glycoprotein-like 7 (rat); POM121 membrane glycoprotein-like 4 pseudogene (rat); POM121 membrane glycoprotein-like 3 (rat) pseudogene; POM121 membrane glycoprotein-like 10 (rat) pseudogene; similar to nuclear pore membrane protein 121 | Homo sapiens |
| 200424    | tet oncogene family member 3                                                                                                                                                                                                                               | Homo sapiens |
| 158219    | tetratricopeptide repeat domain 39B                                                                                                                                                                                                                        | Homo sapiens |
| 114984    | FLYWCH family member 2                                                                                                                                                                                                                                     | Homo sapiens |
| 6208      | ribosomal protein S14                                                                                                                                                                                                                                      | Homo sapiens |
| 23463     | isoprenylcysteine carboxyl methyltransferase                                                                                                                                                                                                               | Homo sapiens |
| 58506     | SR-related CTD-associated factor 1                                                                                                                                                                                                                         | Homo sapiens |
| 9988      | cyclin D binding myb-like transcription factor 1                                                                                                                                                                                                           | Homo sapiens |
| 2671      | growth factor, augments liver regeneration                                                                                                                                                                                                                 | Homo sapiens |

|           |                                                                                                                                                   |              |
|-----------|---------------------------------------------------------------------------------------------------------------------------------------------------|--------------|
| 57332     | chromobox homolog 8 (Pc class homolog, Drosophila)                                                                                                | Homo sapiens |
| 56950     | SET and MYND domain containing 2                                                                                                                  | Homo sapiens |
| 79572     | ATPase type 13A3                                                                                                                                  | Homo sapiens |
| 8970      | histone cluster 1, H2bj                                                                                                                           | Homo sapiens |
| 4166      | carbohydrate (N-acetylglucosamine 6-0) sulfotransferase 6                                                                                         | Homo sapiens |
| 8819      | Sin3A-associated protein, 30kDa                                                                                                                   | Homo sapiens |
| 114034    | target of EGR1, member 1 (nuclear)                                                                                                                | Homo sapiens |
| 339983    | N-acetyltransferase 8-like (GCN5-related, putative)                                                                                               | Homo sapiens |
| 84298     | LLP homolog, long-term synaptic facilitation (Aplysia); similar to LLP homolog; similar to hCG2013595                                             | Homo sapiens |
| 100128533 | LLP homolog, long-term synaptic facilitation (Aplysia); similar to LLP homolog; similar to hCG2013595                                             | Homo sapiens |
| 646644    | LLP homolog, long-term synaptic facilitation (Aplysia); similar to LLP homolog; similar to hCG2013595                                             | Homo sapiens |
| 2045      | EPH receptor A7                                                                                                                                   | Homo sapiens |
| 54883     | coiled-coil domain containing 49                                                                                                                  | Homo sapiens |
| 58490     | regulation of nuclear pre-mRNA domain containing 1B                                                                                               | Homo sapiens |
| 64710     | nuclear casein kinase and cyclin-dependent kinase substrate 1                                                                                     | Homo sapiens |
| 4189      | DnaJ (Hsp40) homolog, subfamily B, member 9                                                                                                       | Homo sapiens |
| 255252    | leucine rich repeat containing 57                                                                                                                 | Homo sapiens |
| 137964    | 1-acylglycerol-3-phosphate O-acyltransferase 6 (lysophosphatidic acid acyltransferase, zeta)                                                      | Homo sapiens |
| 8407      | transgelin 2                                                                                                                                      | Homo sapiens |
| 2257      | fibroblast growth factor 12                                                                                                                       | Homo sapiens |
| 53827     | FXRD domain containing ion transport regulator 5                                                                                                  | Homo sapiens |
| 54537     | family with sequence similarity 35, member A                                                                                                      | Homo sapiens |
| 26032     | sushi domain containing 5                                                                                                                         | Homo sapiens |
| 57222     | endoplasmic reticulum-golgi intermediate compartment (ERGIC) 1                                                                                    | Homo sapiens |
| 388507    | zinc finger family member 788                                                                                                                     | Homo sapiens |
| 107       | adenylate cyclase 1 (brain)                                                                                                                       | Homo sapiens |
| 51135     | interleukin-1 receptor-associated kinase 4                                                                                                        | Homo sapiens |
| 10443     | NEDD4 binding protein 2-like 2                                                                                                                    | Homo sapiens |
| 8153      | Rho family GTPase 2                                                                                                                               | Homo sapiens |
| 25822     | DnaJ (Hsp40) homolog, subfamily B, member 5                                                                                                       | Homo sapiens |
| 23508     | tetratricopeptide repeat domain 9                                                                                                                 | Homo sapiens |
| 3150      | high-mobility group nucleosome binding domain 1                                                                                                   | Homo sapiens |
| 7782      | solute carrier family 30 (zinc transporter), member 4                                                                                             | Homo sapiens |
| 126014    | osteoclast associated, immunoglobulin-like receptor                                                                                               | Homo sapiens |
| 11328     | FK506 binding protein 9, 63 kDa                                                                                                                   | Homo sapiens |
| 51752     | endoplasmic reticulum aminopeptidase 1                                                                                                            | Homo sapiens |
| 5585      | protein kinase N1                                                                                                                                 | Homo sapiens |
| 7091      | transducin-like enhancer of split 4 (E(spl) homolog, Drosophila)                                                                                  | Homo sapiens |
| 6314      | ataxin 7                                                                                                                                          | Homo sapiens |
| 23613     | zinc finger, MYND-type containing 8                                                                                                               | Homo sapiens |
| 80727     | tweety homolog 3 (Drosophila)                                                                                                                     | Homo sapiens |
| 162073    | inositol 1,4,5-triphosphate receptor interacting protein-like 2                                                                                   | Homo sapiens |
| 54918     | CKLF-like MARVEL transmembrane domain containing 6                                                                                                | Homo sapiens |
| 5780      | protein tyrosine phosphatase, non-receptor type 9                                                                                                 | Homo sapiens |
| 54973     | cleavage and polyadenylation specific factor 3-like                                                                                               | Homo sapiens |
| 10484     | Sec23 homolog A (S. cerevisiae)                                                                                                                   | Homo sapiens |
| 1804      | dipeptidyl-peptidase 6                                                                                                                            | Homo sapiens |
| 84245     | methylthioribose-1-phosphate isomerase homolog (S. cerevisiae)                                                                                    | Homo sapiens |
| 26155     | nucleolar complex associated 2 homolog (S. cerevisiae)                                                                                            | Homo sapiens |
| 3696      | integrin, beta 8                                                                                                                                  | Homo sapiens |
| 2627      | GATA binding protein 6                                                                                                                            | Homo sapiens |
| 1973      | similar to eukaryotic translation initiation factor 4A; small nucleolar RNA, H/ACA box 67; eukaryotic translation initiation factor 4A, isoform 1 | Homo sapiens |
| 728698    | similar to eukaryotic translation initiation factor 4A; small nucleolar RNA, H/ACA box 67; eukaryotic translation initiation factor 4A, isoform 1 | Homo sapiens |
| 26781     | similar to eukaryotic translation initiation factor 4A; small nucleolar RNA, H/ACA box 67; eukaryotic translation initiation factor 4A, isoform 1 | Homo sapiens |
| 130497    | odd-skipped related 1 (Drosophila)                                                                                                                | Homo sapiens |
| 83855     | Kruppel-like factor 16                                                                                                                            | Homo sapiens |
| 25792     | CDKN1A interacting zinc finger protein 1                                                                                                          | Homo sapiens |
| 10721     | polymerase (DNA directed), theta                                                                                                                  | Homo sapiens |
| 7637      | zinc finger protein 84                                                                                                                            | Homo sapiens |
| 7128      | tumor necrosis factor, alpha-induced protein 3                                                                                                    | Homo sapiens |
| 56681     | SAR1 homolog A (S. cerevisiae)                                                                                                                    | Homo sapiens |
| 55146     | zinc finger, DHHC-type containing 4                                                                                                               | Homo sapiens |
| 27113     | BCL2 binding component 3                                                                                                                          | Homo sapiens |
| 5976      | UPF1 regulator of nonsense transcripts homolog (yeast)                                                                                            | Homo sapiens |
| 613       | breakpoint cluster region                                                                                                                         | Homo sapiens |
| 80205     | chromodomain helicase DNA binding protein 9                                                                                                       | Homo sapiens |
| 30836     | deoxynucleotidyltransferase, terminal, interacting protein 2                                                                                      | Homo sapiens |
| 4782      | nuclear factor I/C (CCAAT-binding transcription factor)                                                                                           | Homo sapiens |
| 8372      | hyaluronoglucosaminidase 3                                                                                                                        | Homo sapiens |
| 11118     | butyrophilin, subfamily 3, member A2                                                                                                              | Homo sapiens |
| 7866      | interferon-related developmental regulator 2                                                                                                      | Homo sapiens |
| 29843     | SUMO1/sentrin specific peptidase 1                                                                                                                | Homo sapiens |

|           |                                                                                                                                                 |              |
|-----------|-------------------------------------------------------------------------------------------------------------------------------------------------|--------------|
| 23291     | F-box and WD repeat domain containing 11                                                                                                        | Homo sapiens |
| 646915    | zinc finger protein 285B; zinc finger protein 285A; zinc finger protein 806                                                                     | Homo sapiens |
| 26974     | zinc finger protein 285B; zinc finger protein 285A; zinc finger protein 806                                                                     | Homo sapiens |
| 147711    | zinc finger protein 285B; zinc finger protein 285A; zinc finger protein 806                                                                     | Homo sapiens |
| 4591      | tripartite motif-containing 37                                                                                                                  | Homo sapiens |
| 6118      | replication protein A2, 32kDa                                                                                                                   | Homo sapiens |
| 4087      | SMAD family member 2                                                                                                                            | Homo sapiens |
| 55969     | chromosome 20 open reading frame 24                                                                                                             | Homo sapiens |
| 4069      | lysozyme (renal amyloidosis)                                                                                                                    | Homo sapiens |
| 51463     | G protein-coupled receptor 89C; G protein-coupled receptor 89B; G protein-coupled receptor 89A                                                  | Homo sapiens |
| 653519    | G protein-coupled receptor 89C; G protein-coupled receptor 89B; G protein-coupled receptor 89A                                                  | Homo sapiens |
| 728932    | G protein-coupled receptor 89C; G protein-coupled receptor 89B; G protein-coupled receptor 89A                                                  | Homo sapiens |
| 6814      | syntaxin binding protein 3                                                                                                                      | Homo sapiens |
| 10691     | glucocorticoid modulatory element binding protein 1                                                                                             | Homo sapiens |
| 6195      | ribosomal protein S6 kinase, 90kDa, polypeptide 1                                                                                               | Homo sapiens |
| 3073      | hexosaminidase A (alpha polypeptide)                                                                                                            | Homo sapiens |
| 163049    | zinc finger protein 791                                                                                                                         | Homo sapiens |
| 152926    | protein phosphatase 1K (PP2C domain containing)                                                                                                 | Homo sapiens |
| 11044     | polymerase (DNA directed) sigma                                                                                                                 | Homo sapiens |
| 7365      | UDP glucuronosyltransferase 2 family, polypeptide B10                                                                                           | Homo sapiens |
| 348738    | chromosome 2 open reading frame 48                                                                                                              | Homo sapiens |
| 8985      | procollagen-lysine, 2-oxoglutarate 5-dioxygenase 3                                                                                              | Homo sapiens |
| 729677    | ribosomal protein L7 pseudogene 26; ribosomal protein L7 pseudogene 16; ribosomal protein L7; pseudogene 24; ribosomal protein L7 pseudogene 20 | Homo sapiens |
| 728843    | ribosomal protein L7 pseudogene 26; ribosomal protein L7 pseudogene 16; ribosomal protein L7; pseudogene 24; ribosomal protein L7 pseudogene 20 | Homo sapiens |
| 648000    | ribosomal protein L7 pseudogene 26; ribosomal protein L7 pseudogene 16; ribosomal protein L7; pseudogene 24; ribosomal protein L7 pseudogene 20 | Homo sapiens |
| 100127893 | ribosomal protein L7 pseudogene 26; ribosomal protein L7 pseudogene 16; ribosomal protein L7; pseudogene 24; ribosomal protein L7 pseudogene 20 | Homo sapiens |
| 100130892 | ribosomal protein L7 pseudogene 26; ribosomal protein L7 pseudogene 16; ribosomal protein L7; pseudogene 24; ribosomal protein L7 pseudogene 20 | Homo sapiens |
| 728380    | ribosomal protein L7 pseudogene 26; ribosomal protein L7 pseudogene 16; ribosomal protein L7; pseudogene 24; ribosomal protein L7 pseudogene 20 | Homo sapiens |
| 6129      | ribosomal protein L7 pseudogene 26; ribosomal protein L7 pseudogene 16; ribosomal protein L7; pseudogene 24; ribosomal protein L7 pseudogene 20 | Homo sapiens |
| 5162      | pyruvate dehydrogenase (lipoamide) beta                                                                                                         | Homo sapiens |
| 286512    | similar to eukaryotic translation initiation factor 4A2; eukaryotic translation initiation factor 4A, isoform 2                                 | Homo sapiens |
| 1974      | similar to eukaryotic translation initiation factor 4A2; eukaryotic translation initiation factor 4A, isoform 2                                 | Homo sapiens |
| 83539     | carbohydrate (N-acetylgalactosamine 4-O) sulfotransferase 9                                                                                     | Homo sapiens |
| 8848      | TSC22 domain family, member 1                                                                                                                   | Homo sapiens |
| 7803      | protein tyrosine phosphatase type IVA, member 1                                                                                                 | Homo sapiens |
| 4731      | NADH dehydrogenase (ubiquinone) flavoprotein 3, 10kDa                                                                                           | Homo sapiens |
| 10866     | HLA complex P5                                                                                                                                  | Homo sapiens |
| 387338    | NOL1/NOP2/Sun domain family, member 4                                                                                                           | Homo sapiens |
| 8479      | HIRA interacting protein 3                                                                                                                      | Homo sapiens |
| 6439      | surfactant protein B                                                                                                                            | Homo sapiens |
| 11343     | monoglyceride lipase                                                                                                                            | Homo sapiens |
| 29062     | WD repeat domain 91                                                                                                                             | Homo sapiens |
| 81575     | apolipoprotein L domain containing 1                                                                                                            | Homo sapiens |
| 8195      | McKusick-Kaufman syndrome                                                                                                                       | Homo sapiens |
| 9643      | mortality factor 4 like 2                                                                                                                       | Homo sapiens |
| 3344      | forkhead box N2                                                                                                                                 | Homo sapiens |
| 158293    | family with sequence similarity 120A opposite strand                                                                                            | Homo sapiens |
| 23612     | pleckstrin homology-like domain, family A, member 3                                                                                             | Homo sapiens |
| 477       | ATPase, Na <sup>+</sup> /K <sup>+</sup> transporting, alpha 2 (+) polypeptide                                                                   | Homo sapiens |
| 8574      | aldo-keto reductase family 7, member A2 (aflatoxin aldehyde reductase)                                                                          | Homo sapiens |
| 84516     | dynactin 5 (p25)                                                                                                                                | Homo sapiens |
| 6832      | suppressor of var1, 3-like 1 (S. cerevisiae)                                                                                                    | Homo sapiens |
| 7112      | thymopoietin                                                                                                                                    | Homo sapiens |
| 57536     | KIAA1328                                                                                                                                        | Homo sapiens |
| 81555     | Yipl domain family, member 5                                                                                                                    | Homo sapiens |
| 26071     | family with sequence similarity 127, member B                                                                                                   | Homo sapiens |
| 63916     | engulfment and cell motility 2                                                                                                                  | Homo sapiens |
| 339327    | zinc finger protein 546                                                                                                                         | Homo sapiens |
| 2693      | growth hormone secretagogue receptor                                                                                                            | Homo sapiens |
| 149466    | chromosome 1 open reading frame 210                                                                                                             | Homo sapiens |

|        |                                                                                                                                                                                                              |              |
|--------|--------------------------------------------------------------------------------------------------------------------------------------------------------------------------------------------------------------|--------------|
| 9972   | nucleoporin 153kDa                                                                                                                                                                                           | Homo sapiens |
| 571    | BTB and CNC homology 1, basic leucine zipper transcription factor 1                                                                                                                                          | Homo sapiens |
| 127829 | ADP-ribosylation factor-like 8A                                                                                                                                                                              | Homo sapiens |
| 10980  | COP9 constitutive photomorphogenic homolog subunit 6 (Arabidopsis)                                                                                                                                           | Homo sapiens |
| 54741  | leptin receptor overlapping transcript                                                                                                                                                                       | Homo sapiens |
| 1869   | E2F transcription factor 1                                                                                                                                                                                   | Homo sapiens |
| 9069   | claudin 12                                                                                                                                                                                                   | Homo sapiens |
| 9128   | PRP4 pre-mRNA processing factor 4 homolog (yeast)                                                                                                                                                            | Homo sapiens |
| 22847  | zinc finger protein 507                                                                                                                                                                                      | Homo sapiens |
| 663    | BCL2/adenovirus E1B 19kDa interacting protein 2                                                                                                                                                              | Homo sapiens |
| 51652  | vacuolar protein sorting 24 homolog (S. cerevisiae); ring finger protein 103                                                                                                                                 | Homo sapiens |
| 7844   | vacuolar protein sorting 24 homolog (S. cerevisiae); ring finger protein 103                                                                                                                                 | Homo sapiens |
| 85407  | naked cuticle homolog 1 (Drosophila)                                                                                                                                                                         | Homo sapiens |
| 60491  | NIF3 NGG1 interacting factor 3-like 1 (S. pombe)                                                                                                                                                             | Homo sapiens |
| 483    | ATPase, Na+/K+ transporting, beta 3 polypeptide                                                                                                                                                              | Homo sapiens |
| 9066   | synaptotagmin XVII; synaptotagmin VII                                                                                                                                                                        | Homo sapiens |
| 51760  | synaptotagmin XVII; synaptotagmin VII                                                                                                                                                                        | Homo sapiens |
| 9955   | heparan sulfate (glucosamine) 3-O-sulfotransferase 3A1                                                                                                                                                       | Homo sapiens |
| 10251  | sprouty homolog 3 (Drosophila)                                                                                                                                                                               | Homo sapiens |
| 11176  | bromodomain adjacent to zinc finger domain, 2A                                                                                                                                                               | Homo sapiens |
| 284723 | solute carrier family 25, member 34                                                                                                                                                                          | Homo sapiens |
| 83998  | regenerating islet-derived family, member 4                                                                                                                                                                  | Homo sapiens |
| 27440  | cat eye syndrome chromosome region, candidate 5                                                                                                                                                              | Homo sapiens |
| 253461 | zinc finger and BTB domain containing 38                                                                                                                                                                     | Homo sapiens |
| 9748   | STE20-like kinase (yeast)                                                                                                                                                                                    | Homo sapiens |
| 1785   | dynamitin 2                                                                                                                                                                                                  | Homo sapiens |
| 5111   | proliferating cell nuclear antigen                                                                                                                                                                           | Homo sapiens |
| 57182  | ankyrin repeat domain 50                                                                                                                                                                                     | Homo sapiens |
| 23528  | zinc finger protein 281                                                                                                                                                                                      | Homo sapiens |
| 84928  | transmembrane protein 209                                                                                                                                                                                    | Homo sapiens |
| 64743  | WD repeat domain 13                                                                                                                                                                                          | Homo sapiens |
| 51649  | mitochondrial ribosomal protein S23                                                                                                                                                                          | Homo sapiens |
| 8555   | CDC14 cell division cycle 14 homolog B (S. cerevisiae)                                                                                                                                                       | Homo sapiens |
| 7644   | zinc finger protein 91                                                                                                                                                                                       | Homo sapiens |
| 9692   | KIAA0391                                                                                                                                                                                                     | Homo sapiens |
| 10913  | ectodysplasin A receptor                                                                                                                                                                                     | Homo sapiens |
| 29886  | sorting nexin 8                                                                                                                                                                                              | Homo sapiens |
| 8797   | tumor necrosis factor receptor superfamily, member 10a                                                                                                                                                       | Homo sapiens |
| 51654  | CDK5 regulatory subunit associated protein 1                                                                                                                                                                 | Homo sapiens |
| 11282  | mannosyl (alpha-1,3-)-glycoprotein beta-1,4-N-acetylglucosaminyltransferase, isozyme B                                                                                                                       | Homo sapiens |
| 196    | aryl hydrocarbon receptor                                                                                                                                                                                    | Homo sapiens |
| 5905   | Ran GTPase activating protein 1                                                                                                                                                                              | Homo sapiens |
| 9711   | KIAA0226                                                                                                                                                                                                     | Homo sapiens |
| 9652   | tetratricopeptide repeat domain 37                                                                                                                                                                           | Homo sapiens |
| 54460  | mitochondrial ribosomal protein S21                                                                                                                                                                          | Homo sapiens |
| 9294   | sphingosine-1-phosphate receptor 2                                                                                                                                                                           | Homo sapiens |
| 4337   | molybdenum cofactor synthesis 1                                                                                                                                                                              | Homo sapiens |
| 202134 | family with sequence similarity 153, member B                                                                                                                                                                | Homo sapiens |
| 51249  | transmembrane protein 69                                                                                                                                                                                     | Homo sapiens |
| 81844  | tripartite motif-containing 56                                                                                                                                                                               | Homo sapiens |
| 54458  | proline rich 13                                                                                                                                                                                              | Homo sapiens |
| 4644   | myosin VA (heavy chain 12, myosin)                                                                                                                                                                           | Homo sapiens |
| 157922 | calmodulin regulated spectrin-associated protein 1                                                                                                                                                           | Homo sapiens |
| 115704 | ecotropic viral integration site 5-like                                                                                                                                                                      | Homo sapiens |
| 27102  | eukaryotic translation initiation factor 2-alpha kinase 1                                                                                                                                                    | Homo sapiens |
| 23075  | SWAP switching B-cell complex 70kDa subunit                                                                                                                                                                  | Homo sapiens |
| 55680  | RUN and FYVE domain containing 2                                                                                                                                                                             | Homo sapiens |
| 9236   | cell cycle progression 1                                                                                                                                                                                     | Homo sapiens |
| 677    | zinc finger protein 36, C3H type-like 1                                                                                                                                                                      | Homo sapiens |
| 4781   | nuclear factor I/B                                                                                                                                                                                           | Homo sapiens |
| 3704   | inosine triphosphatase (nucleoside triphosphate pyrophosphatase)                                                                                                                                             | Homo sapiens |
| 96459  | folliculin interacting protein 1                                                                                                                                                                             | Homo sapiens |
| 51196  | phospholipase C, epsilon 1                                                                                                                                                                                   | Homo sapiens |
| 84271  | polymerase (DNA-directed), delta interacting protein 3                                                                                                                                                       | Homo sapiens |
| 1802   | DPH2 homolog (S. cerevisiae)                                                                                                                                                                                 | Homo sapiens |
| 126017 | zinc finger protein 813                                                                                                                                                                                      | Homo sapiens |
| 127262 | tumor protein p63 regulated 1-like                                                                                                                                                                           | Homo sapiens |
| 57834  | cytochrome P450, family 4, subfamily F, polypeptide 11                                                                                                                                                       | Homo sapiens |
| 54361  | wingless-type MMTV integration site family, member 4                                                                                                                                                         | Homo sapiens |
| 526    | ATPase, H+ transporting, lysosomal 56/58kDa, VI subunit B2                                                                                                                                                   | Homo sapiens |
| 50861  | stathmin-like 3                                                                                                                                                                                              | Homo sapiens |
| 9372   | zinc finger, FYVE domain containing 9                                                                                                                                                                        | Homo sapiens |
| 403    | ADP-ribosylation factor-like 3                                                                                                                                                                               | Homo sapiens |
| 23558  | WW domain binding protein 2                                                                                                                                                                                  | Homo sapiens |
| 4598   | mevalonate kinase                                                                                                                                                                                            | Homo sapiens |
| 2145   | enhancer of zeste homolog 1 (Drosophila)                                                                                                                                                                     | Homo sapiens |
| 728576 | ribosomal protein L15 pseudogene 22; ribosomal protein L15 pseudogene 18; ribosomal protein L15 pseudogene 17; ribosomal protein L15 pseudogene 3; ribosomal protein L15 pseudogene 7; ribosomal protein L15 | Homo sapiens |

|           |                                                                                                                                                                                                              |              |
|-----------|--------------------------------------------------------------------------------------------------------------------------------------------------------------------------------------------------------------|--------------|
| 100130624 | ribosomal protein L15 pseudogene 22; ribosomal protein L15 pseudogene 18; ribosomal protein L15 pseudogene 17; ribosomal protein L15 pseudogene 3; ribosomal protein L15 pseudogene 7; ribosomal protein L15 | Homo sapiens |
| 6138      | ribosomal protein L15 pseudogene 22; ribosomal protein L15 pseudogene 18; ribosomal protein L15 pseudogene 17; ribosomal protein L15 pseudogene 3; ribosomal protein L15 pseudogene 7; ribosomal protein L15 | Homo sapiens |
| 728002    | ribosomal protein L15 pseudogene 22; ribosomal protein L15 pseudogene 18; ribosomal protein L15 pseudogene 17; ribosomal protein L15 pseudogene 3; ribosomal protein L15 pseudogene 7; ribosomal protein L15 | Homo sapiens |
| 653232    | ribosomal protein L15 pseudogene 22; ribosomal protein L15 pseudogene 18; ribosomal protein L15 pseudogene 17; ribosomal protein L15 pseudogene 3; ribosomal protein L15 pseudogene 7; ribosomal protein L15 | Homo sapiens |
| 728088    | ribosomal protein L15 pseudogene 22; ribosomal protein L15 pseudogene 18; ribosomal protein L15 pseudogene 17; ribosomal protein L15 pseudogene 3; ribosomal protein L15 pseudogene 7; ribosomal protein L15 | Homo sapiens |
| 6990      | dynein, light chain, Tctex-type 3                                                                                                                                                                            | Homo sapiens |
| 57003     | coiled-coil domain containing 47                                                                                                                                                                             | Homo sapiens |
| 94056     | synapse associated protein 1, SAP47 homolog (Drosophila)                                                                                                                                                     | Homo sapiens |
| 54920     | dihydrouridine synthase 2-like, SMM1 homolog (S. cerevisiae)                                                                                                                                                 | Homo sapiens |
| 55839     | centromere protein N                                                                                                                                                                                         | Homo sapiens |
| 83461     | cell division cycle associated 3                                                                                                                                                                             | Homo sapiens |
| 122961    | iron-sulfur cluster assembly 2 homolog (S. cerevisiae)                                                                                                                                                       | Homo sapiens |
| 23162     | mitogen-activated protein kinase 8 interacting protein 3                                                                                                                                                     | Homo sapiens |
| 9609      | RAB36, member RAS oncogene family                                                                                                                                                                            | Homo sapiens |
| 57455     | REX1, RNA exonuclease 1 homolog (S. cerevisiae)                                                                                                                                                              | Homo sapiens |
| 262       | adenosylmethionine decarboxylase 1                                                                                                                                                                           | Homo sapiens |
| 3239      | homeobox D13                                                                                                                                                                                                 | Homo sapiens |
| 55273     | transmembrane protein 100                                                                                                                                                                                    | Homo sapiens |
| 220963    | solute carrier family 16, member 9 (monocarboxylic acid transporter 9)                                                                                                                                       | Homo sapiens |
| 23005     | mitogen-activated protein kinase binding protein 1                                                                                                                                                           | Homo sapiens |
| 9135      | rabaptin, RAB GTPase binding effector protein 1                                                                                                                                                              | Homo sapiens |
| 5723      | phosphoserine phosphatase-like; phosphoserine phosphatase                                                                                                                                                    | Homo sapiens |
| 8781      | phosphoserine phosphatase-like; phosphoserine phosphatase                                                                                                                                                    | Homo sapiens |
| 1610      | D-amino-acid oxidase                                                                                                                                                                                         | Homo sapiens |
| 6856      | synaptophysin-like 1                                                                                                                                                                                         | Homo sapiens |
| 26580     | Bernardinelli-Seip congenital lipodystrophy 2 (seipin)                                                                                                                                                       | Homo sapiens |
| 154661    | RUN domain containing 3B                                                                                                                                                                                     | Homo sapiens |
| 55240     | STEAP family member 3                                                                                                                                                                                        | Homo sapiens |
| 5250      | solute carrier family 25 (mitochondrial carrier; phosphate carrier), member 3                                                                                                                                | Homo sapiens |
| 57579     | family with sequence similarity 135, member A                                                                                                                                                                | Homo sapiens |
| 22876     | inositol polyphosphate-5-phosphatase F                                                                                                                                                                       | Homo sapiens |
| 3798      | kinesin family member 5A                                                                                                                                                                                     | Homo sapiens |
| 10424     | progesterone receptor membrane component 2                                                                                                                                                                   | Homo sapiens |
| 8290      | histone cluster 3, H3                                                                                                                                                                                        | Homo sapiens |
| 23507     | leucine rich repeat containing 8 family, member B                                                                                                                                                            | Homo sapiens |
| 7162      | trophoblast glycoprotein                                                                                                                                                                                     | Homo sapiens |
| 10630     | podoplanin                                                                                                                                                                                                   | Homo sapiens |
| 4983      | oligophrenin 1                                                                                                                                                                                               | Homo sapiens |
| 3301      | DnaJ (Hsp40) homolog, subfamily A, member 1                                                                                                                                                                  | Homo sapiens |
| 23057     | nicotinamide nucleotide adenylyltransferase 2                                                                                                                                                                | Homo sapiens |
| 60485     | salvador homolog 1 (Drosophila)                                                                                                                                                                              | Homo sapiens |
| 347733    | tubulin, beta 2B                                                                                                                                                                                             | Homo sapiens |
| 30818     | Kv channel interacting protein 3, calsenilin                                                                                                                                                                 | Homo sapiens |
| 126328    | NADH dehydrogenase (ubiquinone) 1 alpha subcomplex, 11, 14.7kDa                                                                                                                                              | Homo sapiens |
| 1058      | centromere protein A                                                                                                                                                                                         | Homo sapiens |
| 28970     | chromosome 11 open reading frame 54                                                                                                                                                                          | Homo sapiens |
| 5034      | prolyl 4-hydroxylase, beta polypeptide                                                                                                                                                                       | Homo sapiens |
| 255189    | phospholipase A2, group IVF                                                                                                                                                                                  | Homo sapiens |
| 23054     | nuclear receptor coactivator 6                                                                                                                                                                               | Homo sapiens |
| 23780     | apolipoprotein L, 2                                                                                                                                                                                          | Homo sapiens |
| 60343     | family with sequence similarity 3, member A                                                                                                                                                                  | Homo sapiens |
| 27246     | ring finger protein 115                                                                                                                                                                                      | Homo sapiens |
| 2794      | guanine nucleotide binding protein-like 1                                                                                                                                                                    | Homo sapiens |
| 7620      | zinc finger protein 69                                                                                                                                                                                       | Homo sapiens |
| 7295      | thioredoxin                                                                                                                                                                                                  | Homo sapiens |
| 6229      | ribosomal protein S24                                                                                                                                                                                        | Homo sapiens |
| 10808     | heat shock 105kDa/110kDa protein 1                                                                                                                                                                           | Homo sapiens |
| 4976      | optic atrophy 1 (autosomal dominant)                                                                                                                                                                         | Homo sapiens |
| 83881     | Mixl homeobox-like 1 (Xenopus laevis)                                                                                                                                                                        | Homo sapiens |
| 114825    | PWWP domain containing 2A                                                                                                                                                                                    | Homo sapiens |
| 607       | B-cell CLL/lymphoma 9                                                                                                                                                                                        | Homo sapiens |
| 22807     | IKAROS family zinc finger 2 (Helios)                                                                                                                                                                         | Homo sapiens |
| 6892      | TAP binding protein (tapasin)                                                                                                                                                                                | Homo sapiens |
| 55664     | cell division cycle 37 homolog (S. cerevisiae)-like 1                                                                                                                                                        | Homo sapiens |
| 84932     | RAB2B, member RAS oncogene family                                                                                                                                                                            | Homo sapiens |
| 58494     | junctional adhesion molecule 2                                                                                                                                                                               | Homo sapiens |
| 6513      | solute carrier family 2 (facilitated glucose transporter), member 1                                                                                                                                          | Homo sapiens |
| 2218      | fukutin                                                                                                                                                                                                      | Homo sapiens |
| 9180      | oncostatin M receptor                                                                                                                                                                                        | Homo sapiens |



|           |                                                                                                                                 |              |
|-----------|---------------------------------------------------------------------------------------------------------------------------------|--------------|
| 4508      | Cytochrome c oxidase subunit 3; ATP synthase subunit a; ATP synthase protein 8                                                  | Homo sapiens |
| 4514      | Cytochrome c oxidase subunit 3; ATP synthase subunit a; ATP synthase protein 8                                                  | Homo sapiens |
| 4509      | Cytochrome c oxidase subunit 3; ATP synthase subunit a; ATP synthase protein 8                                                  | Homo sapiens |
| 6775074   | Cytochrome c oxidase subunit 3; ATP synthase subunit a; ATP synthase protein 8                                                  | Homo sapiens |
| 6775073   | Cytochrome c oxidase subunit 3; ATP synthase subunit a; ATP synthase protein 8                                                  | Homo sapiens |
| 6775077   | Cytochrome c oxidase subunit 3; ATP synthase subunit a; ATP synthase protein 8                                                  | Homo sapiens |
| 30837     | suppressor of cytokine signaling 7                                                                                              | Homo sapiens |
| 5725      | polypyrimidine tract binding protein 1                                                                                          | Homo sapiens |
| 10005     | acyl-CoA thioesterase 8                                                                                                         | Homo sapiens |
| 55210     | ATPase family, AAA domain containing 3A                                                                                         | Homo sapiens |
| 53981     | cleavage and polyadenylation specific factor 2, 100kDa                                                                          | Homo sapiens |
| 5213      | phosphofructokinase, muscle                                                                                                     | Homo sapiens |
| 9620      | cadherin, EGF LAG seven-pass G-type receptor 1 (flamingo homolog, Drosophila)                                                   | Homo sapiens |
| 394263    | mucin 21, cell surface associated                                                                                               | Homo sapiens |
| 59084     | ectonucleotide pyrophosphatase/phosphodiesterase 5 (putative function)                                                          | Homo sapiens |
| 8732      | RNA guanylyltransferase and 5'-phosphatase                                                                                      | Homo sapiens |
| 221823    | phosphoribosyl pyrophosphate synthetase 1; phosphoribosyl pyrophosphate synthetase 1-like 1                                     | Homo sapiens |
| 5631      | phosphoribosyl pyrophosphate synthetase 1; phosphoribosyl pyrophosphate synthetase 1-like 1                                     | Homo sapiens |
| 2957      | general transcription factor IIA, 1, 19/37kDa                                                                                   | Homo sapiens |
| 222584    | family with sequence similarity 83, member B                                                                                    | Homo sapiens |
| 23786     | BCL2-like 13 (apoptosis facilitator)                                                                                            | Homo sapiens |
| 80167     | chromosome 4 open reading frame 29                                                                                              | Homo sapiens |
| 64112     | modulator of apoptosis 1                                                                                                        | Homo sapiens |
| 1750      | distal-less homeobox 6                                                                                                          | Homo sapiens |
| 2012      | epithelial membrane protein 1                                                                                                   | Homo sapiens |
| 7189      | TNF receptor-associated factor 6                                                                                                | Homo sapiens |
| 9093      | DnaJ (Hsp40) homolog, subfamily A, member 3                                                                                     | Homo sapiens |
| 3673      | integrin, alpha 2 (CD49B, alpha 2 subunit of VLA-2 receptor)                                                                    | Homo sapiens |
| 57089     | ectonucleoside triphosphate diphosphohydrolase 7                                                                                | Homo sapiens |
| 23404     | exosome component 2                                                                                                             | Homo sapiens |
| 729148    | nuclear undecaprenyl pyrophosphate synthase 1 pseudogene; nuclear undecaprenyl pyrophosphate synthase 1 homolog (S. cerevisiae) | Homo sapiens |
| 116150    | nuclear undecaprenyl pyrophosphate synthase 1 pseudogene; nuclear undecaprenyl pyrophosphate synthase 1 homolog (S. cerevisiae) | Homo sapiens |
| 2649      | nuclear receptor subfamily 6, group A, member 1                                                                                 | Homo sapiens |
| 155435    | RNA binding motif protein 33                                                                                                    | Homo sapiens |
| 100132364 | NIN1/RPN12 binding protein 1 homolog (S. cerevisiae); hypothetical LOC100132364                                                 | Homo sapiens |
| 28987     | NIN1/RPN12 binding protein 1 homolog (S. cerevisiae); hypothetical LOC100132364                                                 | Homo sapiens |
| 9833      | maternal embryonic leucine zipper kinase                                                                                        | Homo sapiens |
| 920       | CD4 molecule                                                                                                                    | Homo sapiens |
| 51506     | ubiquitin-fold modifier conjugating enzyme 1                                                                                    | Homo sapiens |
| 23683     | protein kinase D3                                                                                                               | Homo sapiens |
| 126382    | nuclear receptor 2C2-associated protein                                                                                         | Homo sapiens |
| 2329      | flavin containing monooxygenase 4                                                                                               | Homo sapiens |
| 3226      | homeobox C10                                                                                                                    | Homo sapiens |
| 4670      | heterogeneous nuclear ribonucleoprotein M                                                                                       | Homo sapiens |
| 1665      | DEAH (Asp-Glu-Ala-His) box polypeptide 15                                                                                       | Homo sapiens |
| 131566    | discoïdin, CUB and LCCL domain containing 2                                                                                     | Homo sapiens |
| 1875      | E2F transcription factor 5, p130-binding                                                                                        | Homo sapiens |
| 356       | Fas ligand (TNF superfamily, member 6)                                                                                          | Homo sapiens |
| 3321      | immunoglobulin superfamily, member 3                                                                                            | Homo sapiens |
| 56896     | dihydropyrimidinase-like 5                                                                                                      | Homo sapiens |
| 64359     | nucleoredoxin                                                                                                                   | Homo sapiens |
| 7248      | tuberous sclerosis 1                                                                                                            | Homo sapiens |
| 3745      | potassium voltage-gated channel, Shab-related subfamily, member 1                                                               | Homo sapiens |
| 10574     | chaperonin containing TCP1, subunit 7 (eta)                                                                                     | Homo sapiens |
| 57481     | KIAA1210                                                                                                                        | Homo sapiens |
| 254048    | ubiquitin 2                                                                                                                     | Homo sapiens |
| 5251      | phosphate regulating endopeptidase homolog, X-linked                                                                            | Homo sapiens |
| 1605      | dystroglycan 1 (dystrophin-associated glycoprotein 1)                                                                           | Homo sapiens |
| 83743     | glutamate-rich WD repeat containing 1                                                                                           | Homo sapiens |
| 11033     | ArfGAP with dual PH domains 1                                                                                                   | Homo sapiens |
| 8697      | cell division cycle 23 homolog (S. cerevisiae)                                                                                  | Homo sapiens |
| 57592     | zinc finger protein 687                                                                                                         | Homo sapiens |
| 6346      | chemokine (C-C motif) ligand 1                                                                                                  | Homo sapiens |
| 55729     | activating transcription factor 7 interacting protein                                                                           | Homo sapiens |
| 87        | actinin, alpha 1                                                                                                                | Homo sapiens |
| 54662     | TBC1 domain family, member 13                                                                                                   | Homo sapiens |
| 908       | chaperonin containing TCP1, subunit 6A (zeta 1)                                                                                 | Homo sapiens |
| 11060     | WW domain containing E3 ubiquitin protein ligase 2                                                                              | Homo sapiens |
| 1535      | cytochrome b-245, alpha polypeptide                                                                                             | Homo sapiens |
| 84154     | brix domain containing 1 pseudogene; brix domain containing 1                                                                   | Homo sapiens |
| 729608    | brix domain containing 1 pseudogene; brix domain containing 1                                                                   | Homo sapiens |
| 84172     | polymerase (RNA) I polypeptide B, 128kDa                                                                                        | Homo sapiens |
| 79080     | coiled-coil domain containing 86                                                                                                | Homo sapiens |
| 7465      | WEE1 homolog (S. pombe)                                                                                                         | Homo sapiens |
| 140901    | serine/threonine kinase 35                                                                                                      | Homo sapiens |

|           |                                                                                                       |              |
|-----------|-------------------------------------------------------------------------------------------------------|--------------|
| 4943      | TBC1 domain family, member 25                                                                         | Homo sapiens |
| 6367      | chemokine (C-C motif) ligand 22                                                                       | Homo sapiens |
| 598       | BCL2-like 1                                                                                           | Homo sapiens |
| 2550      | gamma-aminobutyric acid (GABA) B receptor, 1                                                          | Homo sapiens |
| 2220      | ficolin (collagen/fibrinogen domain containing lectin) 2 (hucolin)                                    | Homo sapiens |
| 197131    | ubiquitin protein ligase E3 component n-recognin 1                                                    | Homo sapiens |
| 5130      | phosphate cytidyltransferase 1, choline, alpha                                                        | Homo sapiens |
| 139562    | OTU domain containing 6A                                                                              | Homo sapiens |
| 353131    | late cornified envelope 1A                                                                            | Homo sapiens |
| 51479     | ankyrin repeat and FYVE domain containing 1                                                           | Homo sapiens |
| 5193      | peroxisomal biogenesis factor 12                                                                      | Homo sapiens |
| 56259     | catenin, beta like 1                                                                                  | Homo sapiens |
| 80351     | tankyrase, TRF1-interacting ankyrin-related ADP-ribose polymerase 2                                   | Homo sapiens |
| 33        | acyl-Coenzyme A dehydrogenase, long chain                                                             | Homo sapiens |
| 9967      | thyroid hormone receptor associated protein 3                                                         | Homo sapiens |
| 22800     | related RAS viral (r-ras) oncogene homolog 2; similar to related RAS viral (r-ras) oncogene homolog 2 | Homo sapiens |
| 100133211 | related RAS viral (r-ras) oncogene homolog 2; similar to related RAS viral (r-ras) oncogene homolog 2 | Homo sapiens |
| 64976     | mitochondrial ribosomal protein L40                                                                   | Homo sapiens |
| 5912      | RAP2B, member of RAS oncogene family                                                                  | Homo sapiens |
| 84187     | transmembrane protein 164                                                                             | Homo sapiens |
| 51205     | acid phosphatase 6, lysophosphatidic                                                                  | Homo sapiens |
| 374308    | patched domain containing 3                                                                           | Homo sapiens |
| 440193    | coiled-coil domain containing 88C                                                                     | Homo sapiens |
| 642       | bleomycin hydrolase                                                                                   | Homo sapiens |
| 8774      | N-ethylmaleimide-sensitive factor attachment protein, gamma                                           | Homo sapiens |
| 54880     | BCL6 co-repressor                                                                                     | Homo sapiens |
| 165631    | poly (ADP-ribose) polymerase family, member 15                                                        | Homo sapiens |
| 256130    | transmembrane protein 196                                                                             | Homo sapiens |
| 6095      | RAR-related orphan receptor A                                                                         | Homo sapiens |
| 387893    | SET domain containing (lysine methyltransferase) 8                                                    | Homo sapiens |
| 4809      | NHP2 non-histone chromosome protein 2-like 1 (S. cerevisiae)                                          | Homo sapiens |
| 5336      | phospholipase C, gamma 2 (phosphatidylinositol-specific)                                              | Homo sapiens |
| 121274    | zinc finger protein 641                                                                               | Homo sapiens |
| 5476      | cathepsin A                                                                                           | Homo sapiens |
| 84460     | zinc finger, matrin type 1                                                                            | Homo sapiens |
| 81603     | tripartite motif-containing 8                                                                         | Homo sapiens |
| 140707    | BRI3 binding protein                                                                                  | Homo sapiens |
| 51092     | SID1 transmembrane family, member 2                                                                   | Homo sapiens |
| 7551      | zinc finger protein 3                                                                                 | Homo sapiens |
| 474170    | leucine rich repeat containing 37, member A2                                                          | Homo sapiens |
| 112939    | nucleus accumbens associated 1, BEN and BTB (POZ) domain containing                                   | Homo sapiens |
| 84679     | solute carrier family 9 (sodium/hydrogen exchanger), member 7                                         | Homo sapiens |
| 55521     | tripartite motif-containing 36                                                                        | Homo sapiens |
| 8550      | mitogen-activated protein kinase-activated protein kinase 5                                           | Homo sapiens |
| 440086    | ribosomal protein S6 pseudogene 25; ribosomal protein S6; ribosomal protein S6 pseudogene 1           | Homo sapiens |
| 6194      | ribosomal protein S6 pseudogene 25; ribosomal protein S6; ribosomal protein S6 pseudogene 1           | Homo sapiens |
| 729389    | ribosomal protein S6 pseudogene 25; ribosomal protein S6; ribosomal protein S6 pseudogene 1           | Homo sapiens |
| 55183     | RAP1 interacting factor homolog (yeast)                                                               | Homo sapiens |
| 64122     | fructosamine 3 kinase                                                                                 | Homo sapiens |
| 100128086 | APAF1 interacting protein; similar to APAF1 interacting protein                                       | Homo sapiens |
| 51074     | APAF1 interacting protein; similar to APAF1 interacting protein                                       | Homo sapiens |
| 7433      | vasoactive intestinal peptide receptor 1                                                              | Homo sapiens |
| 4988      | opioid receptor, mu 1                                                                                 | Homo sapiens |
| 5083      | paired box 9                                                                                          | Homo sapiens |
| 9054      | NFS1 nitrogen fixation 1 homolog (S. cerevisiae)                                                      | Homo sapiens |
| 126638    | repetin                                                                                               | Homo sapiens |
| 10389     | sex comb on midleg-like 2 (Drosophila)                                                                | Homo sapiens |
| 51439     | family with sequence similarity 8, member A1                                                          | Homo sapiens |
| 25886     | WD repeat domain 51A                                                                                  | Homo sapiens |
| 58512     | discs, large (Drosophila) homolog-associated protein 3                                                | Homo sapiens |
| 10935     | peroxiredoxin 3                                                                                       | Homo sapiens |
| 23266     | latrophilin 2                                                                                         | Homo sapiens |
| 10592     | structural maintenance of chromosomes 2                                                               | Homo sapiens |
| 7222      | transient receptor potential cation channel, subfamily C, member 3                                    | Homo sapiens |
| 8453      | cullin 2                                                                                              | Homo sapiens |
| 6829      | suppressor of Ty 5 homolog (S. cerevisiae)                                                            | Homo sapiens |
| 36        | acyl-Coenzyme A dehydrogenase, short/branched chain                                                   | Homo sapiens |
| 55171     | TBCC domain containing 1                                                                              | Homo sapiens |
| 80223     | RAB11 family interacting protein 1 (class I)                                                          | Homo sapiens |
| 255101    | coiled-coil domain containing 108                                                                     | Homo sapiens |
| 440991    | ribosomal protein S3 pseudogene 3; ribosomal protein S3                                               | Homo sapiens |
| 6188      | ribosomal protein S3 pseudogene 3; ribosomal protein S3                                               | Homo sapiens |
| 83943     | IMP2 inner mitochondrial membrane peptidase-like (S. cerevisiae)                                      | Homo sapiens |
| 89797     | neuron navigator 2                                                                                    | Homo sapiens |

|        |                                                                                                     |              |
|--------|-----------------------------------------------------------------------------------------------------|--------------|
| 7082   | tight junction protein 1 (zona occludens 1)                                                         | Homo sapiens |
| 24147  | four jointed box 1 (Drosophila)                                                                     | Homo sapiens |
| 3607   | forkhead box K2                                                                                     | Homo sapiens |
| 79837  | phosphatidylinositol-5-phosphate 4-kinase, type II, gamma                                           | Homo sapiens |
| 8925   | hect (homologous to the E6-AP (UBE3A) carboxyl terminus) domain and RCC1 (CHC1)-like domain (RLD) 1 | Homo sapiens |
| 57486  | neurolysin (metallopeptidase M3 family)                                                             | Homo sapiens |
| 4062   | lymphocyte antigen 6 complex, locus H                                                               | Homo sapiens |
| 26020  | low density lipoprotein receptor-related protein 10                                                 | Homo sapiens |
| 80219  | coenzyme Q10 homolog B (S. cerevisiae)                                                              | Homo sapiens |
| 8682   | phosphoprotein enriched in astrocytes 15                                                            | Homo sapiens |
| 285175 | chromosome 2 open reading frame 21                                                                  | Homo sapiens |
| 84930  | microtubule associated serine/threonine kinase-like                                                 | Homo sapiens |
| 284613 | cytochrome b-561 domain containing 1                                                                | Homo sapiens |
| 83548  | component of oligomeric golgi complex 3                                                             | Homo sapiens |
| 5329   | plasminogen activator, urokinase receptor                                                           | Homo sapiens |
| 51329  | ADP-ribosylation-like factor 6 interacting protein 4                                                | Homo sapiens |
| 3235   | homeobox D9                                                                                         | Homo sapiens |
| 4281   | midline 1 (Opitz/BBB syndrome)                                                                      | Homo sapiens |
| 8653   | DEAD (Asp-Glu-Ala-Asp) box polypeptide 3, Y-linked                                                  | Homo sapiens |
| 10090  | uronyl-2-sulfotransferase                                                                           | Homo sapiens |
| 57489  | outer dense fiber of sperm tails 2-like                                                             | Homo sapiens |
| 396    | Rho GDP dissociation inhibitor (GDI) alpha                                                          | Homo sapiens |
| 51026  | golgi transport 1 homolog B (S. cerevisiae)                                                         | Homo sapiens |
| 200407 | cellular repressor of E1A-stimulated genes 2                                                        | Homo sapiens |
| 8444   | dual-specificity tyrosine-(Y)-phosphorylation regulated kinase 3                                    | Homo sapiens |
| 10687  | paraneoplastic antigen MA2                                                                          | Homo sapiens |
| 2702   | gap junction protein, alpha 5, 40kDa                                                                | Homo sapiens |
| 28974  | chromosome 19 open reading frame 53                                                                 | Homo sapiens |
| 85451  | unkempt homolog (Drosophila)                                                                        | Homo sapiens |
| 55157  | aspartyl-tRNA synthetase 2, mitochondrial                                                           | Homo sapiens |
| 2521   | fusion (involved in t(12;16) in malignant liposarcoma)                                              | Homo sapiens |
| 221458 | kinesin family member 6                                                                             | Homo sapiens |
| 653659 | transmembrane protein 183A; transmembrane protein 183B                                              | Homo sapiens |
| 92703  | transmembrane protein 183A; transmembrane protein 183B                                              | Homo sapiens |
| 6646   | sterol O-acyltransferase 1                                                                          | Homo sapiens |
| 444    | aspartate beta-hydroxylase                                                                          | Homo sapiens |
| 64423  | inverted formin, FH2 and WH2 domain containing                                                      | Homo sapiens |
| 55186  | solute carrier family 25, member 36                                                                 | Homo sapiens |
| 6156   | ribosomal protein L30                                                                               | Homo sapiens |
| 23268  | dynamamin binding protein                                                                           | Homo sapiens |
| 388569 | zinc finger protein 324B                                                                            | Homo sapiens |
| 3480   | insulin-like growth factor 1 receptor                                                               | Homo sapiens |
| 29121  | C-type lectin domain family 2, member D                                                             | Homo sapiens |
| 26168  | SUMO1/sentrin/SMT3 specific peptidase 3                                                             | Homo sapiens |
| 256356 | glycerol kinase 5 (putative)                                                                        | Homo sapiens |
| 25870  | sulfatase modifying factor 2                                                                        | Homo sapiens |
| 9852   | EPM2A (laforin) interacting protein 1                                                               | Homo sapiens |
| 9149   | dual-specificity tyrosine-(Y)-phosphorylation regulated kinase 1B                                   | Homo sapiens |
| 6903   | tubulin folding cofactor C                                                                          | Homo sapiens |
| 25     | c-abl oncogene 1, receptor tyrosine kinase                                                          | Homo sapiens |
| 64344  | hypoxia inducible factor 3, alpha subunit                                                           | Homo sapiens |
| 117178 | synovial sarcoma, X breakpoint 2 interacting protein                                                | Homo sapiens |
| 4282   | macrophage migration inhibitory factor (glycosylation-inhibiting factor)                            | Homo sapiens |
| 133121 | ectonucleotide pyrophosphatase/phosphodiesterase 6                                                  | Homo sapiens |
| 114908 | transmembrane protein 123                                                                           | Homo sapiens |
| 65265  | chromosome 8 open reading frame 33                                                                  | Homo sapiens |
| 339175 | methyltransferase like 2A                                                                           | Homo sapiens |
| 2782   | guanine nucleotide binding protein (G protein), beta polypeptide 1                                  | Homo sapiens |
| 57826  | RAP2C, member of RAS oncogene family                                                                | Homo sapiens |
| 64855  | family with sequence similarity 129, member B                                                       | Homo sapiens |
| 10600  | ubiquitin specific peptidase 16                                                                     | Homo sapiens |
| 9922   | IQ motif and Sec7 domain 1                                                                          | Homo sapiens |
| 57097  | poly (ADP-ribose) polymerase family, member 11                                                      | Homo sapiens |
| 246243 | ribonuclease H1                                                                                     | Homo sapiens |
| 23283  | cleavage stimulation factor, 3' pre-RNA, subunit 2, 64kDa, tau variant                              | Homo sapiens |
| 79836  | LON peptidase N-terminal domain and ring finger 3                                                   | Homo sapiens |
| 26088  | golgi associated, gamma adaptin ear containing, ARF binding protein 1                               | Homo sapiens |
| 5589   | protein kinase C substrate 80K-H                                                                    | Homo sapiens |
| 80314  | enhancer of polycomb homolog 1 (Drosophila)                                                         | Homo sapiens |
| 158427 | chromosome 9 open reading frame 97                                                                  | Homo sapiens |
| 6731   | signal recognition particle 72kDa                                                                   | Homo sapiens |
| 3052   | holocytochrome c synthase (cytochrome c heme-lyase)                                                 | Homo sapiens |
| 728927 | similar to hCG40110                                                                                 | Homo sapiens |
| 136259 | Kruppel-like factor 14                                                                              | Homo sapiens |
| 10105  | peptidylprolyl isomerase F                                                                          | Homo sapiens |
| 8645   | potassium channel, subfamily K, member 5                                                            | Homo sapiens |
| 2355   | FOS-like antigen 2                                                                                  | Homo sapiens |
| 51106  | transcription factor B1, mitochondrial                                                              | Homo sapiens |

|        |                                                                                                                                    |              |
|--------|------------------------------------------------------------------------------------------------------------------------------------|--------------|
| 51107  | anterior pharynx defective 1 homolog A ( <i>C. elegans</i> )                                                                       | Homo sapiens |
| 9145   | synaptogyrin 1                                                                                                                     | Homo sapiens |
| 197257 | lactate dehydrogenase D                                                                                                            | Homo sapiens |
| 79172  | centromere protein 0                                                                                                               | Homo sapiens |
| 84687  | protein phosphatase 1, regulatory (inhibitor) subunit 9B                                                                           | Homo sapiens |
| 8711   | tyrosine kinase, non-receptor, 1                                                                                                   | Homo sapiens |
| 2903   | glutamate receptor, ionotropic, N-methyl D-aspartate 2A                                                                            | Homo sapiens |
| 7532   | tyrosine 3-monooxygenase/tryptophan 5-monooxygenase activation protein, gamma polypeptide                                          | Homo sapiens |
| 26040  | SET binding protein 1                                                                                                              | Homo sapiens |
| 7534   | tyrosine 3-monooxygenase/tryptophan 5-monooxygenase activation protein, zeta polypeptide                                           | Homo sapiens |
| 58477  | signal recognition particle receptor, B subunit                                                                                    | Homo sapiens |
| 727997 | ribosomal protein S12; ribosomal protein S12 pseudogene 4; ribosomal protein S12 pseudogene 11; ribosomal protein S12 pseudogene 9 | Homo sapiens |
| 442270 | ribosomal protein S12; ribosomal protein S12 pseudogene 4; ribosomal protein S12 pseudogene 11; ribosomal protein S12 pseudogene 9 | Homo sapiens |
| 6206   | ribosomal protein S12; ribosomal protein S12 pseudogene 4; ribosomal protein S12 pseudogene 11; ribosomal protein S12 pseudogene 9 | Homo sapiens |
| 391370 | ribosomal protein S12; ribosomal protein S12 pseudogene 4; ribosomal protein S12 pseudogene 11; ribosomal protein S12 pseudogene 9 | Homo sapiens |
| 130589 | galactose mutarotase (aldose 1-epimerase)                                                                                          | Homo sapiens |
| 55193  | polybromo 1                                                                                                                        | Homo sapiens |
| 80207  | optic atrophy 3 (autosomal recessive, with chorea and spastic paraplegia)                                                          | Homo sapiens |
| 221937 | forkhead box K1                                                                                                                    | Homo sapiens |
| 54893  | myotubularin related protein 10                                                                                                    | Homo sapiens |
| 64919  | B-cell CLL/lymphoma 11B (zinc finger protein)                                                                                      | Homo sapiens |
| 10945  | KDEL (Lys-Asp-Glu-Leu) endoplasmic reticulum protein retention receptor 1                                                          | Homo sapiens |
| 5824   | peroxisomal biogenesis factor 19                                                                                                   | Homo sapiens |
| 23248  | regulation of nuclear pre-mRNA domain containing 2                                                                                 | Homo sapiens |
| 54832  | vacuolar protein sorting 13 homolog C ( <i>S. cerevisiae</i> )                                                                     | Homo sapiens |
| 10082  | glypican 6                                                                                                                         | Homo sapiens |
| 5441   | polymerase (RNA) II (DNA directed) polypeptide L, 7.6kDa                                                                           | Homo sapiens |
| 10171  | RNA terminal phosphate cyclase-like 1                                                                                              | Homo sapiens |
| 10195  | asparagine-linked glycosylation 3, alpha-1,3- mannosyltransferase homolog ( <i>S. cerevisiae</i> )                                 | Homo sapiens |
| 1965   | eukaryotic translation initiation factor 2, subunit 1 alpha, 35kDa                                                                 | Homo sapiens |
| 56134  | protocadherin alpha 13; protocadherin alpha 10; protocadherin alpha subfamily C, 1; protocadherin alpha subfamily C, 2             | Homo sapiens |
| 56139  | protocadherin alpha 13; protocadherin alpha 10; protocadherin alpha subfamily C, 1; protocadherin alpha subfamily C, 2             | Homo sapiens |
| 56135  | protocadherin alpha 13; protocadherin alpha 10; protocadherin alpha subfamily C, 1; protocadherin alpha subfamily C, 2             | Homo sapiens |
| 56136  | protocadherin alpha 13; protocadherin alpha 10; protocadherin alpha subfamily C, 1; protocadherin alpha subfamily C, 2             | Homo sapiens |
| 5753   | PTK6 protein tyrosine kinase 6                                                                                                     | Homo sapiens |
| 84294  | UTP23, small subunit (SSU) processome component, homolog (yeast)                                                                   | Homo sapiens |
| 155368 | Williams Beuren syndrome chromosome region 27                                                                                      | Homo sapiens |
| 2776   | guanine nucleotide binding protein (G protein), q polypeptide                                                                      | Homo sapiens |
| 55124  | hydroxy-delta-5-steroid dehydrogenase, 3 beta- and steroid delta-isomerase 7; piwi-like 2 ( <i>Drosophila</i> )                    | Homo sapiens |
| 80270  | hydroxy-delta-5-steroid dehydrogenase, 3 beta- and steroid delta-isomerase 7; piwi-like 2 ( <i>Drosophila</i> )                    | Homo sapiens |
| 440181 | similar to transmembrane protein 98; transmembrane protein 98                                                                      | Homo sapiens |
| 26022  | similar to transmembrane protein 98; transmembrane protein 98                                                                      | Homo sapiens |
| 63876  | PBX/knotted 1 homeobox 2                                                                                                           | Homo sapiens |
| 65985  | acetoacetyl-CoA synthetase                                                                                                         | Homo sapiens |
| 5049   | platelet-activating factor acetylhydrolase, isoform Ib, subunit 2 (30kDa)                                                          | Homo sapiens |
| 4326   | matrix metalloproteinase 17 (membrane-inserted)                                                                                    | Homo sapiens |
| 55890  | G protein-coupled receptor, family C, group 5, member C                                                                            | Homo sapiens |
| 23467  | neuronal pentraxin receptor                                                                                                        | Homo sapiens |
| 114987 | WD repeat domain 31                                                                                                                | Homo sapiens |
| 4157   | tubulin, beta 3; melanocortin 1 receptor (alpha melanocyte stimulating hormone receptor)                                           | Homo sapiens |
| 10381  | tubulin, beta 3; melanocortin 1 receptor (alpha melanocyte stimulating hormone receptor)                                           | Homo sapiens |
| 57085  | angiotensin II receptor-associated protein                                                                                         | Homo sapiens |
| 9112   | metastasis associated 1                                                                                                            | Homo sapiens |
| 25979  | dehydrogenase/reductase (SDR family) member 7B                                                                                     | Homo sapiens |
| 283149 | B-cell CLL/lymphoma 9-like                                                                                                         | Homo sapiens |
| 116064 | leucine rich repeat containing 58                                                                                                  | Homo sapiens |
| 84865  | coiled-coil domain containing 142                                                                                                  | Homo sapiens |
| 26224  | F-box and leucine-rich repeat protein 3                                                                                            | Homo sapiens |
| 9816   | URB2 ribosome biogenesis 2 homolog ( <i>S. cerevisiae</i> )                                                                        | Homo sapiens |
| 3386   | intercellular adhesion molecule 4 (Landsteiner-Wiener blood group)                                                                 | Homo sapiens |
| 91010  | formin-like 3                                                                                                                      | Homo sapiens |
| 55751  | transmembrane protein 184C                                                                                                         | Homo sapiens |
| 9753   | zinc finger and SCAN domain containing 12                                                                                          | Homo sapiens |
| 59286  | ubiquitin-like 5                                                                                                                   | Homo sapiens |
| 2103   | estrogen-related receptor beta                                                                                                     | Homo sapiens |
| 353116 | Rab interacting lysosomal protein-like 1                                                                                           | Homo sapiens |
| 9402   | GRB2-related adaptor protein 2                                                                                                     | Homo sapiens |

|           |                                                                                                                       |              |
|-----------|-----------------------------------------------------------------------------------------------------------------------|--------------|
| 83861     | radial spoke 3 homolog ( <i>Chlamydomonas</i> )                                                                       | Homo sapiens |
| 91050     | coiled-coil domain containing 149                                                                                     | Homo sapiens |
| 29933     | G protein-coupled receptor 132                                                                                        | Homo sapiens |
| 164       | adaptor-related protein complex 1, gamma 1 subunit                                                                    | Homo sapiens |
| 10257     | ATP-binding cassette, sub-family C (CFTR/MRP), member 4                                                               | Homo sapiens |
| 144404    | transmembrane protein 120B                                                                                            | Homo sapiens |
| 57010     | calcium binding protein 4                                                                                             | Homo sapiens |
| 728611    | BMS1 homolog, ribosome assembly protein (yeast) pseudogene; BMS1 homolog, ribosome assembly protein (yeast)           | Homo sapiens |
| 653557    | BMS1 homolog, ribosome assembly protein (yeast) pseudogene; BMS1 homolog, ribosome assembly protein (yeast)           | Homo sapiens |
| 642311    | BMS1 homolog, ribosome assembly protein (yeast) pseudogene; BMS1 homolog, ribosome assembly protein (yeast)           | Homo sapiens |
| 9790      | BMS1 homolog, ribosome assembly protein (yeast) pseudogene; BMS1 homolog, ribosome assembly protein (yeast)           | Homo sapiens |
| 5316      | PBX/knotted 1 homeobox 1                                                                                              | Homo sapiens |
| 55846     | integrin alpha FG-GAP repeat containing 2                                                                             | Homo sapiens |
| 10940     | processing of precursor 1, ribonuclease P/MRP subunit ( <i>S. cerevisiae</i> )                                        | Homo sapiens |
| 4213      | Meis homeobox 3 pseudogene 1                                                                                          | Homo sapiens |
| 93663     | Rho GTPase activating protein 18                                                                                      | Homo sapiens |
| 6152      | ribosomal protein L24; ribosomal protein L24 pseudogene 6                                                             | Homo sapiens |
| 100129808 | ribosomal protein L24; ribosomal protein L24 pseudogene 6                                                             | Homo sapiens |
| 95        | aminoacylase 1                                                                                                        | Homo sapiens |
| 91433     | RCC1 domain containing 1                                                                                              | Homo sapiens |
| 473       | arginine-glutamic acid dipeptide (RE) repeats                                                                         | Homo sapiens |
| 79901     | cytochrome b reductase 1                                                                                              | Homo sapiens |
| 64981     | mitochondrial ribosomal protein L34                                                                                   | Homo sapiens |
| 5194      | peroxisomal biogenesis factor 13                                                                                      | Homo sapiens |
| 118812    | MORN repeat containing 4                                                                                              | Homo sapiens |
| 1583      | cytochrome P450, family 11, subfamily A, polypeptide 1                                                                | Homo sapiens |
| 23087     | tripartite motif-containing 35                                                                                        | Homo sapiens |
| 26278     | spastic ataxia of Charlevoix-Saguenay (saccin)                                                                        | Homo sapiens |
| 5537      | protein phosphatase 6, catalytic subunit                                                                              | Homo sapiens |
| 8798      | dual-specificity tyrosine-(Y)-phosphorylation regulated kinase 4                                                      | Homo sapiens |
| 81890     | queuine tRNA-ribosyltransferase 1                                                                                     | Homo sapiens |
| 23339     | vacuolar protein sorting 39 homolog ( <i>S. cerevisiae</i> )                                                          | Homo sapiens |
| 11249     | neurexophilin 2                                                                                                       | Homo sapiens |
| 3187      | heterogeneous nuclear ribonucleoprotein H1 (H)                                                                        | Homo sapiens |
| 23247     | KIAA0556                                                                                                              | Homo sapiens |
| 93474     | zinc finger protein 670                                                                                               | Homo sapiens |
| 63875     | mitochondrial ribosomal protein L17                                                                                   | Homo sapiens |
| 55586     | myo-inositol oxygenase                                                                                                | Homo sapiens |
| 11153     | FIC domain containing                                                                                                 | Homo sapiens |
| 9910      | RAB GTPase activating protein 1-like                                                                                  | Homo sapiens |
| 1520      | cathepsin S                                                                                                           | Homo sapiens |
| 57226     | LYR motif containing 2                                                                                                | Homo sapiens |
| 5562      | protein kinase, AMP-activated, alpha 1 catalytic subunit                                                              | Homo sapiens |
| 79016     | DET1 and DDB1 associated 1                                                                                            | Homo sapiens |
| 84836     | abhydrolase domain containing 14B                                                                                     | Homo sapiens |
| 51384     | wingless-type MMTV integration site family, member 16                                                                 | Homo sapiens |
| 84895     | family with sequence similarity 73, member B                                                                          | Homo sapiens |
| 1145      | cholinergic receptor, nicotinic, epsilon                                                                              | Homo sapiens |
| 475       | ATX1 antioxidant protein 1 homolog (yeast)                                                                            | Homo sapiens |
| 5709      | proteasome (prosome, macropain) 26S subunit, non-ATPase, 3                                                            | Homo sapiens |
| 177       | advanced glycosylation end product-specific receptor                                                                  | Homo sapiens |
| 2737      | GLI family zinc finger 3                                                                                              | Homo sapiens |
| 1431      | citrate synthase                                                                                                      | Homo sapiens |
| 993       | cell division cycle 25 homolog A ( <i>S. pombe</i> )                                                                  | Homo sapiens |
| 1174      | adaptor-related protein complex 1, sigma 1 subunit                                                                    | Homo sapiens |
| 7621      | zinc finger protein 70                                                                                                | Homo sapiens |
| 6581      | solute carrier family 22 (extraneuronal monoamine transporter), member 3                                              | Homo sapiens |
| 64429     | zinc finger, DHHC-type containing 6                                                                                   | Homo sapiens |
| 3156      | 3-hydroxy-3-methylglutaryl-Coenzyme A reductase                                                                       | Homo sapiens |
| 441631    | tetraspanin 11                                                                                                        | Homo sapiens |
| 389434    | iodotyrosine deiodinase                                                                                               | Homo sapiens |
| 84248     | forty-two-three domain containing 1                                                                                   | Homo sapiens |
| 9416      | DEAD (Asp-Glu-Ala-Asp) box polypeptide 23                                                                             | Homo sapiens |
| 23031     | microtubule associated serine/threonine kinase 3                                                                      | Homo sapiens |
| 55239     | 2-oxoglutarate and iron-dependent oxygenase domain containing 1                                                       | Homo sapiens |
| 64983     | mitochondrial ribosomal protein L32                                                                                   | Homo sapiens |
| 79005     | sodium channel modifier 1                                                                                             | Homo sapiens |
| 85462     | FH2 domain containing 1                                                                                               | Homo sapiens |
| 10286     | breast carcinoma amplified sequence 2                                                                                 | Homo sapiens |
| 283078    | mohawk homeobox                                                                                                       | Homo sapiens |
| 730429    | similar to E3 ubiquitin protein ligase, HECT domain containing, 1; ubiquitin protein ligase E3 component n-recognin 5 | Homo sapiens |
| 51366     | similar to E3 ubiquitin protein ligase, HECT domain containing, 1; ubiquitin protein ligase E3 component n-recognin 5 | Homo sapiens |
| 100132779 | serine/arginine repetitive matrix 2; hypothetical LOC100132779                                                        | Homo sapiens |

|           |                                                                                                                   |              |
|-----------|-------------------------------------------------------------------------------------------------------------------|--------------|
| 23524     | serine/arginine repetitive matrix 2; hypothetical LOC100132779                                                    | Homo sapiens |
| 6517      | solute carrier family 2 (facilitated glucose transporter), member 4                                               | Homo sapiens |
| 9340      | glucagon-like peptide 2 receptor                                                                                  | Homo sapiens |
| 100129652 | hypothetical protein LOC100129652; ezrin                                                                          | Homo sapiens |
| 7430      | hypothetical protein LOC100129652; ezrin                                                                          | Homo sapiens |
| 79850     | family with sequence similarity 57, member A                                                                      | Homo sapiens |
| 51474     | LIM domain and actin binding 1                                                                                    | Homo sapiens |
| 9076      | claudin 1                                                                                                         | Homo sapiens |
| 50940     | phosphodiesterase 11A                                                                                             | Homo sapiens |
| 54969     | chromosome 4 open reading frame 27                                                                                | Homo sapiens |
| 133746    | junction mediating and regulatory protein, p53 cofactor                                                           | Homo sapiens |
| 9545      | RAB3D, member RAS oncogene family                                                                                 | Homo sapiens |
| 23125     | calmodulin binding transcription activator 2                                                                      | Homo sapiens |
| 56905     | chromosome 15 open reading frame 39                                                                               | Homo sapiens |
| 92399     | mitochondrial ribosome recycling factor                                                                           | Homo sapiens |
| 643314    | hypothetical LOC643314                                                                                            | Homo sapiens |
| 1810      | down-regulator of transcription 1, TBP-binding (negative cofactor 2)                                              | Homo sapiens |
| 55197     | regulation of nuclear pre-mRNA domain containing 1A                                                               | Homo sapiens |
| 51185     | cereblon                                                                                                          | Homo sapiens |
| 64284     | RAB17, member RAS oncogene family                                                                                 | Homo sapiens |
| 6550      | solute carrier family 9 (sodium/hydrogen exchanger), member 3                                                     | Homo sapiens |
| 394       | Rho GTPase activating protein 5                                                                                   | Homo sapiens |
| 5438      | polymerase (RNA) II (DNA directed) polypeptide I, 14.5kDa                                                         | Homo sapiens |
| 6631      | small nuclear ribonucleoprotein polypeptide C                                                                     | Homo sapiens |
| 389432    | sterile alpha motif domain containing 5                                                                           | Homo sapiens |
| 51182     | heat shock 70kDa protein 14                                                                                       | Homo sapiens |
| 84890     | 2-aminoethanethiol (cysteamine) dioxygenase                                                                       | Homo sapiens |
| 1736      | dyskeratosis congenita 1, dyskerin                                                                                | Homo sapiens |
| 339804    | chromosome 2 open reading frame 74                                                                                | Homo sapiens |
| 23405     | dicer 1, ribonuclease type III                                                                                    | Homo sapiens |
| 80335     | WD repeat domain 82                                                                                               | Homo sapiens |
| 7559      | postmeiotic segregation increased 2-like 3; zinc finger protein 12                                                | Homo sapiens |
| 5387      | postmeiotic segregation increased 2-like 3; zinc finger protein 12                                                | Homo sapiens |
| 84542     | KIAA1841                                                                                                          | Homo sapiens |
| 6769      | SH3 and cysteine rich domain                                                                                      | Homo sapiens |
| 83591     | THAP domain containing, apoptosis associated protein 2                                                            | Homo sapiens |
| 3910      | laminin, alpha 4                                                                                                  | Homo sapiens |
| 388697    | hornerin                                                                                                          | Homo sapiens |
| 23673     | syntaxin 12                                                                                                       | Homo sapiens |
| 55666     | nuclear protein localization 4 homolog (S. cerevisiae)                                                            | Homo sapiens |
| 3376      | isoleucyl-tRNA synthetase                                                                                         | Homo sapiens |
| 2885      | growth factor receptor-bound protein 2                                                                            | Homo sapiens |
| 11113     | citron (rho-interacting, serine/threonine kinase 21)                                                              | Homo sapiens |
| 55083     | kinesin family member 26B                                                                                         | Homo sapiens |
| 375287    | RNA binding motif protein 43                                                                                      | Homo sapiens |
| 10549     | peroxiredoxin 4                                                                                                   | Homo sapiens |
| 5881      | ras-related C3 botulinum toxin substrate 3 (rho family, small GTP binding protein Rac3)                           | Homo sapiens |
| 170691    | ADAM metalloproteinase with thrombospondin type 1 motif, 17                                                       | Homo sapiens |
| 23523     | calcineurin binding protein 1                                                                                     | Homo sapiens |
| 26015     | RNA polymerase II associated protein 1                                                                            | Homo sapiens |
| 6884      | TAF13 RNA polymerase II, TATA box binding protein (TBP)-associated factor, 18kDa                                  | Homo sapiens |
| 29803     | replication initiator 1                                                                                           | Homo sapiens |
| 23207     | pleckstrin homology domain containing, family M (with RUN domain) member 2                                        | Homo sapiens |
| 1404      | hyaluronan and proteoglycan link protein 1                                                                        | Homo sapiens |
| 29986     | solute carrier family 39 (zinc transporter), member 2                                                             | Homo sapiens |
| 130574    | LY6/PLAUR domain containing 6                                                                                     | Homo sapiens |
| 57418     | WD repeat domain 18                                                                                               | Homo sapiens |
| 146050    | zinc finger and SCAN domain containing 29                                                                         | Homo sapiens |
| 29066     | zinc finger CCCH-type containing 7A                                                                               | Homo sapiens |
| 26985     | adaptor-related protein complex 3, mu 1 subunit                                                                   | Homo sapiens |
| 55266     | transmembrane protein 19                                                                                          | Homo sapiens |
| 51616     | TAF9B RNA polymerase II, TATA box binding protein (TBP)-associated factor, 31kDa                                  | Homo sapiens |
| 79699     | zyg-11 homolog B (C. elegans)                                                                                     | Homo sapiens |
| 1462      | versican                                                                                                          | Homo sapiens |
| 79184     | BRCA1/BRCA2-containing complex, subunit 3                                                                         | Homo sapiens |
| 23654     | plexin B2                                                                                                         | Homo sapiens |
| 4085      | MAD2 mitotic arrest deficient-like 1 (yeast)                                                                      | Homo sapiens |
| 5579      | protein kinase C, beta                                                                                            | Homo sapiens |
| 100130561 | high-mobility group box 1; high-mobility group box 1-like 10                                                      | Homo sapiens |
| 3146      | high-mobility group box 1; high-mobility group box 1-like 10                                                      | Homo sapiens |
| 57678     | glycerol-3-phosphate acyltransferase, mitochondrial                                                               | Homo sapiens |
| 6352      | chemokine (C-C motif) ligand 5                                                                                    | Homo sapiens |
| 56994     | choline phosphotransferase 1                                                                                      | Homo sapiens |
| 4154      | muscleblind-like (Drosophila)                                                                                     | Homo sapiens |
| 55635     | DEP domain containing 1                                                                                           | Homo sapiens |
| 10607     | transducin (beta)-like 3                                                                                          | Homo sapiens |
| 3309      | hypothetical gene supported by AF216292; NM_005347; heat shock 70kDa protein 5 (glucose-regulated protein, 78kDa) | Homo sapiens |

|           |                                                                                                                                                                          |              |
|-----------|--------------------------------------------------------------------------------------------------------------------------------------------------------------------------|--------------|
| 400750    | hypothetical gene supported by AF216292; NM_005347; heat shock 70kDa protein 5 (glucose-regulated protein, 78kDa)                                                        | Homo sapiens |
| 54784     | alkB, alkylation repair homolog 4 (E. coli)                                                                                                                              | Homo sapiens |
| 375035    | SFT2 domain containing 2                                                                                                                                                 | Homo sapiens |
| 64432     | mitochondrial ribosomal protein S25                                                                                                                                      | Homo sapiens |
| 4008      | LIM domain 7                                                                                                                                                             | Homo sapiens |
| 11330     | chymotrypsin C (caldecrin)                                                                                                                                               | Homo sapiens |
| 871       | serpin peptidase inhibitor, clade H (heat shock protein 47), member 1, (collagen binding protein 1)                                                                      | Homo sapiens |
| 79739     | tubulin tyrosine ligase-like family, member 7                                                                                                                            | Homo sapiens |
| 27341     | ribosomal RNA processing 7 homolog B (S. cerevisiae); ribosomal RNA processing 7 homolog A (S. cerevisiae)                                                               | Homo sapiens |
| 91695     | ribosomal RNA processing 7 homolog B (S. cerevisiae); ribosomal RNA processing 7 homolog A (S. cerevisiae)                                                               | Homo sapiens |
| 162239    | zinc finger protein 1 homolog (mouse)                                                                                                                                    | Homo sapiens |
| 1763      | DNA replication helicase 2 homolog (yeast)                                                                                                                               | Homo sapiens |
| 3981      | ligase IV, DNA, ATP-dependent                                                                                                                                            | Homo sapiens |
| 7436      | very low density lipoprotein receptor                                                                                                                                    | Homo sapiens |
| 64434     | nucleolar protein with MIF4G domain 1                                                                                                                                    | Homo sapiens |
| 56897     | Werner helicase interacting protein 1                                                                                                                                    | Homo sapiens |
| 5518      | protein phosphatase 2 (formerly 2A), regulatory subunit A, alpha isoform                                                                                                 | Homo sapiens |
| 23366     | KIAA0895                                                                                                                                                                 | Homo sapiens |
| 6590      | secretory leukocyte peptidase inhibitor                                                                                                                                  | Homo sapiens |
| 57695     | ubiquitin specific peptidase 37                                                                                                                                          | Homo sapiens |
| 56204     | KIAA1370                                                                                                                                                                 | Homo sapiens |
| 7368      | UDP glycosyltransferase 8                                                                                                                                                | Homo sapiens |
| 100133017 | hypothetical LOC100132856; hypothetical LOC100128100; hypothetical LOC100133017; SNAP25-interacting protein                                                              | Homo sapiens |
| 100132856 | hypothetical LOC100132856; hypothetical LOC100128100; hypothetical LOC100133017; SNAP25-interacting protein                                                              | Homo sapiens |
| 80725     | hypothetical LOC100132856; hypothetical LOC100128100; hypothetical LOC100133017; SNAP25-interacting protein                                                              | Homo sapiens |
| 100128100 | hypothetical LOC100132856; hypothetical LOC100128100; hypothetical LOC100133017; SNAP25-interacting protein                                                              | Homo sapiens |
| 23071     | endoplasmic reticulum protein 44                                                                                                                                         | Homo sapiens |
| 1676      | DNA fragmentation factor, 45kDa, alpha polypeptide                                                                                                                       | Homo sapiens |
| 55299     | brix domain containing 2                                                                                                                                                 | Homo sapiens |
| 8473      | O-linked N-acetylglucosamine (GlcNAc) transferase (UDP-N-acetylglucosamine:polypeptide-N-acetylglucosaminyl transferase)                                                 | Homo sapiens |
| 414236    | chromosome 10 open reading frame 55                                                                                                                                      | Homo sapiens |
| 222229    | leucine-rich repeats and WD repeat domain containing 1                                                                                                                   | Homo sapiens |
| 79731     | asparaginyl-tRNA synthetase 2, mitochondrial (putative)                                                                                                                  | Homo sapiens |
| 79711     | importin 4                                                                                                                                                               | Homo sapiens |
| 8744      | tumor necrosis factor (ligand) superfamily, member 9                                                                                                                     | Homo sapiens |
| 11108     | PR domain containing 4                                                                                                                                                   | Homo sapiens |
| 10155     | tripartite motif-containing 28                                                                                                                                           | Homo sapiens |
| 360023    | zinc finger and BTB domain containing 41                                                                                                                                 | Homo sapiens |
| 148206    | zinc finger protein 714                                                                                                                                                  | Homo sapiens |
| 57720     | G protein-coupled receptor 107                                                                                                                                           | Homo sapiens |
| 81619     | tetraspanin 14                                                                                                                                                           | Homo sapiens |
| 23380     | SLIT-ROBO Rho GTPase activating protein 2                                                                                                                                | Homo sapiens |
| 1452      | casein kinase 1, alpha 1                                                                                                                                                 | Homo sapiens |
| 10109     | actin related protein 2/3 complex, subunit 2, 34kDa                                                                                                                      | Homo sapiens |
| 404785    | POTE ankyrin domain family, member G                                                                                                                                     | Homo sapiens |
| 8445      | dual-specificity tyrosine-(Y)-phosphorylation regulated kinase 2                                                                                                         | Homo sapiens |
| 59269     | human immunodeficiency virus type I enhancer binding protein 3                                                                                                           | Homo sapiens |
| 158586    | zinc finger, X-linked, duplicated B                                                                                                                                      | Homo sapiens |
| 84342     | peptide deformylase (mitochondrial); component of oligomeric golgi complex 8                                                                                             | Homo sapiens |
| 64146     | peptide deformylase (mitochondrial); component of oligomeric golgi complex 8                                                                                             | Homo sapiens |
| 915       | CD3d molecule, delta (CD3-TCR complex)                                                                                                                                   | Homo sapiens |
| 59349     | kelch-like 12 (Drosophila)                                                                                                                                               | Homo sapiens |
| 114294    | lactamase, beta                                                                                                                                                          | Homo sapiens |
| 1870      | E2F transcription factor 2                                                                                                                                               | Homo sapiens |
| 122525    | chromosome 14 open reading frame 28                                                                                                                                      | Homo sapiens |
| 84750     | fucosyltransferase 10 (alpha (1,3) fucosyltransferase)                                                                                                                   | Homo sapiens |
| 51816     | cat eye syndrome chromosome region, candidate 1                                                                                                                          | Homo sapiens |
| 27340     | similar to Down-regulated in metastasis protein (Key-1A6 protein) (Novel nucleolar protein 73) (NNP73); UTP20, small subunit (SSU) processome component, homolog (yeast) | Homo sapiens |
| 653877    | similar to Down-regulated in metastasis protein (Key-1A6 protein) (Novel nucleolar protein 73) (NNP73); UTP20, small subunit (SSU) processome component, homolog (yeast) | Homo sapiens |
| 84135     | UTP15, U3 small nucleolar ribonucleoprotein, homolog (S. cerevisiae)                                                                                                     | Homo sapiens |
| 408       | arrestin, beta 1                                                                                                                                                         | Homo sapiens |
| 56257     | methylphosphate capping enzyme                                                                                                                                           | Homo sapiens |
| 5981      | replication factor C (activator 1) 1, 145kDa                                                                                                                             | Homo sapiens |
| 23049     | SMG1 homolog, phosphatidylinositol 3-kinase-related kinase (C. elegans)                                                                                                  | Homo sapiens |
| 84720     | phosphatidylinositol glycan anchor biosynthesis, class 0                                                                                                                 | Homo sapiens |
| 472       | similar to Serine-protein kinase ATM (Ataxia telangiectasia mutated) (A-T, mutated); ataxia telangiectasia mutated                                                       | Homo sapiens |

|           |                                                                                                                                                              |              |
|-----------|--------------------------------------------------------------------------------------------------------------------------------------------------------------|--------------|
| 651610    | similar to Serine-protein kinase ATM (Ataxia telangiectasia mutated) (A-T, mutated); ataxia telangiectasia mutated                                           | Homo sapiens |
| 80315     | cytoplasmic polyadenylation element binding protein 4                                                                                                        | Homo sapiens |
| 57154     | SMAD specific E3 ubiquitin protein ligase 1                                                                                                                  | Homo sapiens |
| 9322      | thyroid hormone receptor interactor 10                                                                                                                       | Homo sapiens |
| 283643    | chromosome 14 open reading frame 80                                                                                                                          | Homo sapiens |
| 84146     | zinc finger protein 644                                                                                                                                      | Homo sapiens |
| 728642    | similar to cell division cycle 2-like 1 (PITSLRE proteins); cell division cycle 2-like 1 (PITSLRE proteins); cell division cycle 2-like 2 (PITSLRE proteins) | Homo sapiens |
| 984       | similar to cell division cycle 2-like 1 (PITSLRE proteins); cell division cycle 2-like 1 (PITSLRE proteins); cell division cycle 2-like 2 (PITSLRE proteins) | Homo sapiens |
| 100133692 | similar to cell division cycle 2-like 1 (PITSLRE proteins); cell division cycle 2-like 1 (PITSLRE proteins); cell division cycle 2-like 2 (PITSLRE proteins) | Homo sapiens |
| 55334     | solute carrier family 39 (zinc transporter), member 9                                                                                                        | Homo sapiens |
| 29767     | tropomodulin 2 (neuronal)                                                                                                                                    | Homo sapiens |
| 375057    | chromosome 1 open reading frame 95                                                                                                                           | Homo sapiens |
| 9140      | ATG12 autophagy related 12 homolog (S. cerevisiae)                                                                                                           | Homo sapiens |
| 5158      | phosphodiesterase 6B, cGMP-specific, rod, beta                                                                                                               | Homo sapiens |
| 84823     | lamin B2                                                                                                                                                     | Homo sapiens |
| 1368      | carboxypeptidase M                                                                                                                                           | Homo sapiens |
| 3836      | karyopherin alpha 1 (importin alpha 5)                                                                                                                       | Homo sapiens |
| 5873      | RAB27A, member RAS oncogene family                                                                                                                           | Homo sapiens |
| 29927     | Sec61 alpha 1 subunit (S. cerevisiae)                                                                                                                        | Homo sapiens |
| 10409     | brain abundant, membrane attached signal protein 1                                                                                                           | Homo sapiens |
| 27436     | echinoderm microtubule associated protein like 4                                                                                                             | Homo sapiens |
| 79966     | stearoyl-CoA desaturase 5                                                                                                                                    | Homo sapiens |
| 8668      | eukaryotic translation initiation factor 3, subunit I                                                                                                        | Homo sapiens |
| 80067     | chromosome 2 open reading frame 37                                                                                                                           | Homo sapiens |
| 128338    | DNA-damage regulated autophagy modulator 2                                                                                                                   | Homo sapiens |
| 3092      | huntingtin interacting protein 1                                                                                                                             | Homo sapiens |
| 9360      | peptidylprolyl isomerase G (cyclophilin G)                                                                                                                   | Homo sapiens |
| 90231     | KIAA2013; hypothetical LOC728138                                                                                                                             | Homo sapiens |
| 728138    | KIAA2013; hypothetical LOC728138                                                                                                                             | Homo sapiens |
| 8780      | RIO kinase 3 (yeast)                                                                                                                                         | Homo sapiens |
| 91369     | ankyrin repeat domain 40                                                                                                                                     | Homo sapiens |
| 5549      | proline/arginine-rich end leucine-rich repeat protein                                                                                                        | Homo sapiens |
| 221       | aldehyde dehydrogenase 3 family, member B1                                                                                                                   | Homo sapiens |
| 5155      | platelet-derived growth factor beta polypeptide (simian sarcoma viral (v-sis) oncogene homolog)                                                              | Homo sapiens |
| 81631     | microtubule-associated protein 1 light chain 3 beta                                                                                                          | Homo sapiens |
| 389       | ras homolog gene family, member C                                                                                                                            | Homo sapiens |
| 55920     | regulator of chromosome condensation 2                                                                                                                       | Homo sapiens |
| 783       | calcium channel, voltage-dependent, beta 2 subunit                                                                                                           | Homo sapiens |
| 5688      | proteasome (prosome, macropain) subunit, alpha type, 7                                                                                                       | Homo sapiens |
| 54664     | transmembrane protein 106B                                                                                                                                   | Homo sapiens |
| 51742     | AT rich interactive domain 4B (RBP1-like)                                                                                                                    | Homo sapiens |
| 79621     | ribonuclease H2, subunit B                                                                                                                                   | Homo sapiens |
| 29943     | peptidyl arginine deiminase, type I                                                                                                                          | Homo sapiens |
| 1282      | collagen, type IV, alpha 1                                                                                                                                   | Homo sapiens |
| 4092      | SMAD family member 7                                                                                                                                         | Homo sapiens |
| 79794     | chromosome 12 open reading frame 49                                                                                                                          | Homo sapiens |
| 22887     | forkhead box J3                                                                                                                                              | Homo sapiens |
| 6672      | SP100 nuclear antigen                                                                                                                                        | Homo sapiens |
| 56977     | storkhead box 2                                                                                                                                              | Homo sapiens |
| 25842     | ASF1 anti-silencing function 1 homolog A (S. cerevisiae)                                                                                                     | Homo sapiens |
| 7092      | tolloid-like 1                                                                                                                                               | Homo sapiens |
| 8930      | methyl-CpG binding domain protein 4                                                                                                                          | Homo sapiens |
| 5306      | phosphatidylinositol transfer protein, alpha                                                                                                                 | Homo sapiens |
| 6521      | solute carrier family 4, anion exchanger, member 1 (erythrocyte membrane protein band 3, Diego blood group)                                                  | Homo sapiens |
| 5915      | retinoic acid receptor, beta                                                                                                                                 | Homo sapiens |
| 25902     | methylenetetrahydrofolate dehydrogenase (NADP+ dependent) 1-like                                                                                             | Homo sapiens |
| 401474    | sterile alpha motif domain containing 12                                                                                                                     | Homo sapiens |
| 7691      | zinc finger protein 132                                                                                                                                      | Homo sapiens |
| 57690     | trinucleotide repeat containing 6C                                                                                                                           | Homo sapiens |
| 3326      | heat shock protein 90kDa alpha (cytosolic), class B member 1                                                                                                 | Homo sapiens |
| 285676    | zinc finger protein 454                                                                                                                                      | Homo sapiens |
| 7473      | wingless-type MMTV integration site family, member 3                                                                                                         | Homo sapiens |
| 140453    | mucin 17, cell surface associated                                                                                                                            | Homo sapiens |
| 8897      | myotubularin related protein 3                                                                                                                               | Homo sapiens |
| 142891    | sterile alpha motif domain containing 8                                                                                                                      | Homo sapiens |
| 9527      | golgi SNAP receptor complex member 1                                                                                                                         | Homo sapiens |
| 84908     | family with sequence similarity 136, member A                                                                                                                | Homo sapiens |
| 4298      | myeloid/lymphoid or mixed-lineage leukemia (trithorax homolog, Drosophila); translocated to, 1                                                               | Homo sapiens |
| 57798     | GATA zinc finger domain containing 1                                                                                                                         | Homo sapiens |
| 162989    | death effector domain containing 2                                                                                                                           | Homo sapiens |
| 6002      | regulator of G-protein signaling 12                                                                                                                          | Homo sapiens |
| 4067      | v-yes-1 Yamaguchi sarcoma viral related oncogene homolog                                                                                                     | Homo sapiens |



|        |                                                                                                                   |              |
|--------|-------------------------------------------------------------------------------------------------------------------|--------------|
| 57537  | sortilin-related VPS10 domain containing receptor 2                                                               | Homo sapiens |
| 8326   | frizzled homolog 9 (Drosophila)                                                                                   | Homo sapiens |
| 23670  | transmembrane protein 2                                                                                           | Homo sapiens |
| 23225  | nucleoporin 210kDa                                                                                                | Homo sapiens |
| 10111  | RAD50 homolog (S. cerevisiae)                                                                                     | Homo sapiens |
| 3611   | integrin-linked kinase                                                                                            | Homo sapiens |
| 150921 | transcription factor 23                                                                                           | Homo sapiens |
| 54929  | transmembrane protein 161A                                                                                        | Homo sapiens |
| 6389   | succinate dehydrogenase complex, subunit A, flavoprotein (Fp)                                                     | Homo sapiens |
| 5887   | RAD23 homolog B (S. cerevisiae)                                                                                   | Homo sapiens |
| 23527  | ArfGAP with coiled-coil, ankyrin repeat and PH domains 2                                                          | Homo sapiens |
| 83452  | RAB33B, member RAS oncogene family                                                                                | Homo sapiens |
| 4335   | MAX binding protein                                                                                               | Homo sapiens |
| 4172   | minichromosome maintenance complex component 3                                                                    | Homo sapiens |
| 55858  | transmembrane protein 165                                                                                         | Homo sapiens |
| 4711   | NADH dehydrogenase (ubiquinone) 1 beta subcomplex, 5, 16kDa                                                       | Homo sapiens |
| 10061  | ATP-binding cassette, sub-family F (GCN20), member 2                                                              | Homo sapiens |
| 30000  | transportin 2                                                                                                     | Homo sapiens |
| 5876   | Rab geranylgeranyltransferase, beta subunit                                                                       | Homo sapiens |
| 1946   | ephrin-A5                                                                                                         | Homo sapiens |
| 153020 | RasGEF domain family, member 1B                                                                                   | Homo sapiens |
| 5718   | proteasome (prosome, macropain) 26S subunit, non-ATPase, 12                                                       | Homo sapiens |
| 26127  | FGFR1 oncogene partner 2                                                                                          | Homo sapiens |
| 6845   | vesicle-associated membrane protein 7                                                                             | Homo sapiens |
| 55148  | ubiquitin protein ligase E3 component n-recogin 7 (putative)                                                      | Homo sapiens |
| 518    | ATP synthase, H <sup>+</sup> transporting, mitochondrial F0 complex, subunit C3 (subunit 9)                       | Homo sapiens |
| 51715  | RAB23, member RAS oncogene family                                                                                 | Homo sapiens |
| 9632   | SEC24 family, member C (S. cerevisiae)                                                                            | Homo sapiens |
| 2878   | glutathione peroxidase 3 (plasma)                                                                                 | Homo sapiens |
| 8943   | adaptor-related protein complex 3, delta 1 subunit                                                                | Homo sapiens |
| 57333  | reticulocalbin 3, EF-hand calcium binding domain                                                                  | Homo sapiens |
| 51761  | ATPase, aminophospholipid transporter-like, class I, type 8A, member 2                                            | Homo sapiens |
| 3096   | human immunodeficiency virus type I enhancer binding protein 1                                                    | Homo sapiens |
| 4947   | ornithine decarboxylase antizyme 2                                                                                | Homo sapiens |
| 23137  | structural maintenance of chromosomes 5                                                                           | Homo sapiens |
| 10317  | UDP-Gal:betaGlcNAc beta 1,3-galactosyltransferase, polypeptide 5                                                  | Homo sapiens |
| 7247   | translin                                                                                                          | Homo sapiens |
| 84267  | chromosome 9 open reading frame 64                                                                                | Homo sapiens |
| 619279 | zinc finger protein 704                                                                                           | Homo sapiens |
| 144108 | SPT2, Suppressor of Ty, domain containing 1 (S. cerevisiae)                                                       | Homo sapiens |
| 140775 | Smith-Magenis syndrome chromosome region, candidate 8                                                             | Homo sapiens |
| 9519   | TBP-like 1                                                                                                        | Homo sapiens |
| 57119  | WAP four-disulfide core domain 6; serine peptidase inhibitor-like, with Kunitz and WAP domains 1 (eppin)          | Homo sapiens |
| 140870 | WAP four-disulfide core domain 6; serine peptidase inhibitor-like, with Kunitz and WAP domains 1 (eppin)          | Homo sapiens |
| 57122  | nucleoporin 107kDa                                                                                                | Homo sapiens |
| 898    | cyclin E1                                                                                                         | Homo sapiens |
| 22889  | KIAA0907                                                                                                          | Homo sapiens |
| 64132  | xylosyltransferase II                                                                                             | Homo sapiens |
| 10657  | KH domain containing, RNA binding, signal transduction associated 1                                               | Homo sapiens |
| 27031  | nephronophthisis 3 (adolescent); acyl-Coenzyme A dehydrogenase family, member 11                                  | Homo sapiens |
| 84129  | nephronophthisis 3 (adolescent); acyl-Coenzyme A dehydrogenase family, member 11                                  | Homo sapiens |
| 64924  | solute carrier family 30 (zinc transporter), member 5                                                             | Homo sapiens |
| 388531 | regulator of G protein signaling 9 binding protein                                                                | Homo sapiens |
| 728013 | COBW domain containing 5; similar to COBW domain containing 1; COBW domain containing 7; COBW domain containing 3 | Homo sapiens |
| 653510 | COBW domain containing 5; similar to COBW domain containing 1; COBW domain containing 7; COBW domain containing 3 | Homo sapiens |
| 445571 | COBW domain containing 5; similar to COBW domain containing 1; COBW domain containing 7; COBW domain containing 3 | Homo sapiens |
| 220869 | COBW domain containing 5; similar to COBW domain containing 1; COBW domain containing 7; COBW domain containing 3 | Homo sapiens |
| 23645  | protein phosphatase 1, regulatory (inhibitor) subunit 15A                                                         | Homo sapiens |
| 57509  | mitochondrial tumor suppressor 1                                                                                  | Homo sapiens |
| 8704   | UDP-Gal:betaGlcNAc beta 1,4- galactosyltransferase, polypeptide 2                                                 | Homo sapiens |
| 121268 | Ras homolog enriched in brain like 1                                                                              | Homo sapiens |
| 23438  | histidyl-tRNA synthetase 2, mitochondrial (putative); D-tyrosyl-tRNA deacylase 1 homolog (S. cerevisiae)          | Homo sapiens |
| 92675  | histidyl-tRNA synthetase 2, mitochondrial (putative); D-tyrosyl-tRNA deacylase 1 homolog (S. cerevisiae)          | Homo sapiens |
| 29907  | sorting nexin 15                                                                                                  | Homo sapiens |
| 25932  | chloride intracellular channel 4                                                                                  | Homo sapiens |
| 25987  | tsukushin                                                                                                         | Homo sapiens |
| 125111 | gap junction protein, delta 3, 31.9kDa                                                                            | Homo sapiens |
| 57700  | family with sequence similarity 160, member B1                                                                    | Homo sapiens |
| 28966  | sorting nexin 24                                                                                                  | Homo sapiens |
| 155382 | vacuolar protein sorting 37 homolog D (S. cerevisiae)                                                             | Homo sapiens |
| 10263  | cyclin-dependent kinase 2 associated protein 2                                                                    | Homo sapiens |

|        |                                                                                                                               |              |
|--------|-------------------------------------------------------------------------------------------------------------------------------|--------------|
| 26051  | protein phosphatase 1, regulatory (inhibitor) subunit 16B                                                                     | Homo sapiens |
| 9761   | malectin                                                                                                                      | Homo sapiens |
| 146434 | zinc finger protein 597                                                                                                       | Homo sapiens |
| 205564 | SUMO1/sentrin specific peptidase 5                                                                                            | Homo sapiens |
| 125950 | ribonucleoprotein, PTB-binding 1                                                                                              | Homo sapiens |
| 6753   | somatostatin receptor 3                                                                                                       | Homo sapiens |
| 1969   | EPH receptor A2                                                                                                               | Homo sapiens |
| 3206   | homeobox A10                                                                                                                  | Homo sapiens |
| 2936   | glutathione reductase                                                                                                         | Homo sapiens |
| 57716  | periaxin                                                                                                                      | Homo sapiens |
| 51272  | blocked early in transport 1 homolog ( <i>S. cerevisiae</i> )-like                                                            | Homo sapiens |
| 93099  | dermokine                                                                                                                     | Homo sapiens |
| 5140   | phosphodiesterase 3B, cGMP-inhibited                                                                                          | Homo sapiens |
| 79088  | zinc finger protein 426                                                                                                       | Homo sapiens |
| 1033   | cyclin-dependent kinase inhibitor 3                                                                                           | Homo sapiens |
| 8666   | eukaryotic translation initiation factor 3, subunit G                                                                         | Homo sapiens |
| 390927 | zinc finger protein 793                                                                                                       | Homo sapiens |
| 5871   | mitogen-activated protein kinase kinase kinase kinase 2                                                                       | Homo sapiens |
| 9792   | SERTA domain containing 2                                                                                                     | Homo sapiens |
| 9600   | phosphatidylinositol transfer protein, membrane-associated 1                                                                  | Homo sapiens |
| 54676  | GTP binding protein 2                                                                                                         | Homo sapiens |
| 11201  | polymerase (DNA directed) iota                                                                                                | Homo sapiens |
| 389072 | pleckstrin homology domain containing, family M, member 3                                                                     | Homo sapiens |
| 5029   | purinergic receptor P2Y, G-protein coupled, 2                                                                                 | Homo sapiens |
| 7328   | ubiquitin-conjugating enzyme E2H (UBC8 homolog, yeast)                                                                        | Homo sapiens |
| 9975   | nuclear receptor subfamily 1, group D, member 2                                                                               | Homo sapiens |
| 861    | runt-related transcription factor 1                                                                                           | Homo sapiens |
| 7441   | pre-B lymphocyte 1                                                                                                            | Homo sapiens |
| 114884 | oxysterol binding protein-like 10                                                                                             | Homo sapiens |
| 9980   | dopey family member 2                                                                                                         | Homo sapiens |
| 56946  | chromosome 11 open reading frame 30                                                                                           | Homo sapiens |
| 163732 | Cbp/p300-interacting transactivator, with Glu/Asp-rich carboxy-terminal domain, 4                                             | Homo sapiens |
| 949    | scavenger receptor class B, member 1                                                                                          | Homo sapiens |
| 64241  | ATP-binding cassette, sub-family G (WHITE), member 8                                                                          | Homo sapiens |
| 10314  | LanC lantibiotic synthetase component C-like 1 (bacterial)                                                                    | Homo sapiens |
| 26146  | TNF receptor-associated factor 3 interacting protein 1                                                                        | Homo sapiens |
| 79954  | nucleolar protein 10                                                                                                          | Homo sapiens |
| 4659   | protein phosphatase 1, regulatory (inhibitor) subunit 12A                                                                     | Homo sapiens |
| 158405 | KIAA1958                                                                                                                      | Homo sapiens |
| 9908   | GTPase activating protein (SH3 domain) binding protein 2                                                                      | Homo sapiens |
| 23095  | kinesin family member 1B                                                                                                      | Homo sapiens |
| 9749   | phosphatase and actin regulator 2                                                                                             | Homo sapiens |
| 80789  | integrator complex subunit 5                                                                                                  | Homo sapiens |
| 10261  | immunoglobulin superfamily, member 6                                                                                          | Homo sapiens |
| 22877  | MLX interacting protein                                                                                                       | Homo sapiens |
| 5865   | RAB3B, member RAS oncogene family                                                                                             | Homo sapiens |
| 23195  | MDN1, midasin homolog (yeast)                                                                                                 | Homo sapiens |
| 134145 | family with sequence similarity 173, member B                                                                                 | Homo sapiens |
| 9124   | PDZ and LIM domain 1                                                                                                          | Homo sapiens |
| 92755  | tubulin, beta; similar to tubulin, beta 5; tubulin, beta pseudogene 2; tubulin, beta pseudogene 1                             | Homo sapiens |
| 647000 | tubulin, beta; similar to tubulin, beta 5; tubulin, beta pseudogene 2; tubulin, beta pseudogene 1                             | Homo sapiens |
| 442308 | tubulin, beta; similar to tubulin, beta 5; tubulin, beta pseudogene 2; tubulin, beta pseudogene 1                             | Homo sapiens |
| 203068 | tubulin, beta; similar to tubulin, beta 5; tubulin, beta pseudogene 2; tubulin, beta pseudogene 1                             | Homo sapiens |
| 4082   | myristoylated alanine-rich protein kinase C substrate                                                                         | Homo sapiens |
| 152831 | klotho beta                                                                                                                   | Homo sapiens |
| 2752   | glutamate-ammonia ligase (glutamine synthetase)                                                                               | Homo sapiens |
| 5702   | proteasome (prosome, macropain) 26S subunit, ATPase, 3                                                                        | Homo sapiens |
| 26524  | LATS, large tumor suppressor, homolog 2 ( <i>Drosophila</i> )                                                                 | Homo sapiens |
| 79056  | proline rich Gla (G-carboxyglutamic acid) 4 (transmembrane)                                                                   | Homo sapiens |
| 22895  | rabphilin 3A homolog (mouse)                                                                                                  | Homo sapiens |
| 51018  | ribosomal RNA processing 15 homolog ( <i>S. cerevisiae</i> )                                                                  | Homo sapiens |
| 643427 | RNA binding motif, single stranded interacting protein 2; RNA binding motif, single stranded interacting protein 2 pseudogene | Homo sapiens |
| 5939   | RNA binding motif, single stranded interacting protein 2; RNA binding motif, single stranded interacting protein 2 pseudogene | Homo sapiens |
| 401494 | protein tyrosine phosphatase-like A domain containing 2                                                                       | Homo sapiens |
| 9697   | translocation associated membrane protein 2                                                                                   | Homo sapiens |
| 130026 | islet cell autoantigen 1,69kDa-like                                                                                           | Homo sapiens |
| 7014   | telomeric repeat binding factor 2                                                                                             | Homo sapiens |
| 79147  | fukutin related protein                                                                                                       | Homo sapiens |
| 10333  | toll-like receptor 6                                                                                                          | Homo sapiens |
| 7355   | solute carrier family 35 (UDP-galactose transporter), member A2                                                               | Homo sapiens |
| 4853   | Notch homolog 2 ( <i>Drosophila</i> )                                                                                         | Homo sapiens |
| 23025  | unc-13 homolog A ( <i>C. elegans</i> )                                                                                        | Homo sapiens |
| 6494   | signal-induced proliferation-associated 1                                                                                     | Homo sapiens |

|           |                                                                                                 |              |
|-----------|-------------------------------------------------------------------------------------------------|--------------|
| 22954     | tripartite motif-containing 32                                                                  | Homo sapiens |
| 226       | aldolase A, fructose-bisphosphate                                                               | Homo sapiens |
| 2821      | glucose phosphate isomerase                                                                     | Homo sapiens |
| 7410      | vav 2 guanine nucleotide exchange factor                                                        | Homo sapiens |
| 29080     | coiled-coil domain containing 59                                                                | Homo sapiens |
| 643167    | similar to RNA binding motif protein 39; RNA binding motif protein 39                           | Homo sapiens |
| 9584      | similar to RNA binding motif protein 39; RNA binding motif protein 39                           | Homo sapiens |
| 84458     | ligand dependent nuclear receptor corepressor                                                   | Homo sapiens |
| 10206     | tripartite motif-containing 13                                                                  | Homo sapiens |
| 9182      | Ras association (RalGDS/AF-6) domain family (N-terminal) member 9                               | Homo sapiens |
| 84529     | chromosome 15 open reading frame 41                                                             | Homo sapiens |
| 3588      | interleukin 10 receptor, beta                                                                   | Homo sapiens |
| 9853      | RUN and SH3 domain containing 2                                                                 | Homo sapiens |
| 84285     | eukaryotic translation initiation factor 1A domain containing                                   | Homo sapiens |
| 64418     | transmembrane protein 168                                                                       | Homo sapiens |
| 79038     | zinc finger, FYVE domain containing 21                                                          | Homo sapiens |
| 147694    | zinc finger protein 548                                                                         | Homo sapiens |
| 10060     | ATP-binding cassette, sub-family C (CFTR/MRP), member 9                                         | Homo sapiens |
| 116496    | family with sequence similarity 129, member A                                                   | Homo sapiens |
| 54926     | ubiquitin-conjugating enzyme E2R 2                                                              | Homo sapiens |
| 8870      | immediate early response 3                                                                      | Homo sapiens |
| 23450     | splicing factor 3b, subunit 3, 130kDa                                                           | Homo sapiens |
| 65981     | caprin family member 2                                                                          | Homo sapiens |
| 8493      | protein phosphatase 1D magnesium-dependent, delta isoform                                       | Homo sapiens |
| 654429    | leucine-rich repeats and transmembrane domains 2                                                | Homo sapiens |
| 205327    | chromosome 2 open reading frame 69                                                              | Homo sapiens |
| 7874      | ubiquitin specific peptidase 7 (herpes virus-associated)                                        | Homo sapiens |
| 84916     | cirrhosis, autosomal recessive 1A (cirhin)                                                      | Homo sapiens |
| 54788     | DnaJ (Hsp40) homolog, subfamily B, member 12                                                    | Homo sapiens |
| 5187      | period homolog 1 (Drosophila)                                                                   | Homo sapiens |
| 1978      | eukaryotic translation initiation factor 4E binding protein 1                                   | Homo sapiens |
| 85379     | KIAA1671 protein                                                                                | Homo sapiens |
| 689       | basic transcription factor 3; basic transcription factor 3, like 1 pseudogene                   | Homo sapiens |
| 690       | basic transcription factor 3; basic transcription factor 3, like 1 pseudogene                   | Homo sapiens |
| 7764      | zinc finger protein 217                                                                         | Homo sapiens |
| 730094    | chromosome 16 open reading frame 52                                                             | Homo sapiens |
| 55220     | kelch domain containing 8A                                                                      | Homo sapiens |
| 114781    | BTB (POZ) domain containing 9                                                                   | Homo sapiens |
| 80194     | transmembrane protein 134                                                                       | Homo sapiens |
| 6482      | ST3 beta-galactoside alpha-2,3-sialyltransferase 1                                              | Homo sapiens |
| 80311     | kelch-like 15 (Drosophila)                                                                      | Homo sapiens |
| 596       | B-cell CLL/lymphoma 2                                                                           | Homo sapiens |
| 79751     | solute carrier family 25 (mitochondrial carrier: glutamate), member 22                          | Homo sapiens |
| 983       | cell division cycle 2, G1 to S and G2 to M                                                      | Homo sapiens |
| 54476     | ring finger protein 216                                                                         | Homo sapiens |
| 10963     | stress-induced-phosphoprotein 1                                                                 | Homo sapiens |
| 7905      | receptor accessory protein 5                                                                    | Homo sapiens |
| 11319     | ecdysoneless homolog (Drosophila)                                                               | Homo sapiens |
| 3638      | insulin induced gene 1                                                                          | Homo sapiens |
| 22841     | RAB11 family interacting protein 2 (class I)                                                    | Homo sapiens |
| 8647      | ATP-binding cassette, sub-family B (MDR/TAP), member 11                                         | Homo sapiens |
| 57475     | pleckstrin homology domain containing, family H (with MyTH4 domain) member 1                    | Homo sapiens |
| 54822     | transient receptor potential cation channel, subfamily M, member 7                              | Homo sapiens |
| 157570    | establishment of cohesion 1 homolog 2 (S. cerevisiae)                                           | Homo sapiens |
| 4900      | neurogranin (protein kinase C substrate, RC3)                                                   | Homo sapiens |
| 2962      | general transcription factor IIF, polypeptide 1, 74kDa                                          | Homo sapiens |
| 2184      | fumarylacetoacetate hydrolase (fumarylacetoacetase)                                             | Homo sapiens |
| 5834      | phosphorylase, glycogen; brain                                                                  | Homo sapiens |
| 58500     | zinc finger protein 250                                                                         | Homo sapiens |
| 729993    | hypothetical protein LOC729993                                                                  | Homo sapiens |
| 2348      | folate receptor 1 (adult)                                                                       | Homo sapiens |
| 4174      | minichromosome maintenance complex component 5                                                  | Homo sapiens |
| 207063    | dehydrogenase/reductase (SDR family) X-linked                                                   | Homo sapiens |
| 81609     | sorting nexin family member 27                                                                  | Homo sapiens |
| 100134387 | similar to DEAH (Asp-Glu-Ala-His) box polypeptide 40; DEAH (Asp-Glu-Ala-His) box polypeptide 40 | Homo sapiens |
| 79665     | similar to DEAH (Asp-Glu-Ala-His) box polypeptide 40; DEAH (Asp-Glu-Ala-His) box polypeptide 40 | Homo sapiens |
| 6585      | slit homolog 1 (Drosophila)                                                                     | Homo sapiens |
| 6399      | trafficking protein particle complex 2; trafficking protein particle complex 2 pseudogene 1     | Homo sapiens |
| 10597     | trafficking protein particle complex 2; trafficking protein particle complex 2 pseudogene 1     | Homo sapiens |
| 160364    | C-type lectin domain family 12, member A; C-type lectin domain family 12, member B              | Homo sapiens |
| 387837    | C-type lectin domain family 12, member A; C-type lectin domain family 12, member B              | Homo sapiens |
| 79675     | FAST kinase domains 1                                                                           | Homo sapiens |
| 3662      | interferon regulatory factor 4                                                                  | Homo sapiens |
| 23324     | mannosidase, alpha, class 2B, member 2                                                          | Homo sapiens |
| 3752      | potassium voltage-gated channel, Shal-related subfamily, member 3                               | Homo sapiens |

|           |                                                                                                                                                                                                                                      |              |
|-----------|--------------------------------------------------------------------------------------------------------------------------------------------------------------------------------------------------------------------------------------|--------------|
| 3237      | homeobox D11                                                                                                                                                                                                                         | Homo sapiens |
| 5198      | phosphoribosylformylglycinamide synthase                                                                                                                                                                                             | Homo sapiens |
| 80704     | solute carrier family 19, member 3                                                                                                                                                                                                   | Homo sapiens |
| 256471    | major facilitator superfamily domain containing 8                                                                                                                                                                                    | Homo sapiens |
| 4124      | mannosidase, alpha, class 2A, member 1                                                                                                                                                                                               | Homo sapiens |
| 22944     | KIN, antigenic determinant of recA protein homolog (mouse)                                                                                                                                                                           | Homo sapiens |
| 4099      | myelin associated glycoprotein                                                                                                                                                                                                       | Homo sapiens |
| 5310      | polycystic kidney disease 1 (autosomal dominant)                                                                                                                                                                                     | Homo sapiens |
| 51593     | serrate RNA effector molecule homolog (Arabidopsis)                                                                                                                                                                                  | Homo sapiens |
| 10849     | CD3e molecule, epsilon associated protein                                                                                                                                                                                            | Homo sapiens |
| 220213    | OTU domain containing 1                                                                                                                                                                                                              | Homo sapiens |
| 51199     | ninein (GSK3B interacting protein)                                                                                                                                                                                                   | Homo sapiens |
| 5480      | peptidylprolyl isomerase C (cyclophilin C)                                                                                                                                                                                           | Homo sapiens |
| 9175      | mitogen-activated protein kinase kinase kinase 13                                                                                                                                                                                    | Homo sapiens |
| 3028      | hydroxysteroid (17-beta) dehydrogenase 10                                                                                                                                                                                            | Homo sapiens |
| 23101     | MCF.2 cell line derived transforming sequence-like 2                                                                                                                                                                                 | Homo sapiens |
| 5982      | replication factor C (activator 1) 2, 40kDa                                                                                                                                                                                          | Homo sapiens |
| 3054      | host cell factor C1 (VP16-accessory protein)                                                                                                                                                                                         | Homo sapiens |
| 26994     | ring finger protein 11                                                                                                                                                                                                               | Homo sapiens |
| 729839    | similar to DTW domain containing 2; DTW domain containing 2                                                                                                                                                                          | Homo sapiens |
| 285605    | similar to DTW domain containing 2; DTW domain containing 2                                                                                                                                                                          | Homo sapiens |
| 130507    | ubiquitin protein ligase E3 component n-recogin 3 (putative)                                                                                                                                                                         | Homo sapiens |
| 728127    | ArfGAP with GTPase domain, ankyrin repeat and PH domain 5; ArfGAP with GTPase domain, ankyrin repeat and PH domain 9; ArfGAP with GTPase domain, ankyrin repeat and PH domain 10; centaurin, gamma-like family, member 11 pseudogene | Homo sapiens |
| 729092    | ArfGAP with GTPase domain, ankyrin repeat and PH domain 5; ArfGAP with GTPase domain, ankyrin repeat and PH domain 9; ArfGAP with GTPase domain, ankyrin repeat and PH domain 10; centaurin, gamma-like family, member 11 pseudogene | Homo sapiens |
| 653259    | ArfGAP with GTPase domain, ankyrin repeat and PH domain 5; ArfGAP with GTPase domain, ankyrin repeat and PH domain 9; ArfGAP with GTPase domain, ankyrin repeat and PH domain 10; centaurin, gamma-like family, member 11 pseudogene | Homo sapiens |
| 642517    | ArfGAP with GTPase domain, ankyrin repeat and PH domain 5; ArfGAP with GTPase domain, ankyrin repeat and PH domain 9; ArfGAP with GTPase domain, ankyrin repeat and PH domain 10; centaurin, gamma-like family, member 11 pseudogene | Homo sapiens |
| 27        | v-abl Abelson murine leukemia viral oncogene homolog 2 (arg, Abelson-related gene)                                                                                                                                                   | Homo sapiens |
| 5292      | pim-1 oncogene                                                                                                                                                                                                                       | Homo sapiens |
| 3920      | lysosomal-associated membrane protein 2                                                                                                                                                                                              | Homo sapiens |
| 5990      | regulatory factor X, 2 (influences HLA class II expression)                                                                                                                                                                          | Homo sapiens |
| 5728      | phosphatase and tensin homolog; phosphatase and tensin homolog pseudogene 1                                                                                                                                                          | Homo sapiens |
| 11191     | phosphatase and tensin homolog; phosphatase and tensin homolog pseudogene 1                                                                                                                                                          | Homo sapiens |
| 91851     | chordin-like 1                                                                                                                                                                                                                       | Homo sapiens |
| 9801      | mitochondrial ribosomal protein L19                                                                                                                                                                                                  | Homo sapiens |
| 26586     | cytoskeleton associated protein 2                                                                                                                                                                                                    | Homo sapiens |
| 10981     | RAB32, member RAS oncogene family                                                                                                                                                                                                    | Homo sapiens |
| 25914     | rotatin                                                                                                                                                                                                                              | Homo sapiens |
| 642538    | C1D nuclear receptor co-repressor; similar to nuclear DNA-binding protein; similar to hCG1791993                                                                                                                                     | Homo sapiens |
| 642521    | C1D nuclear receptor co-repressor; similar to nuclear DNA-binding protein; similar to hCG1791993                                                                                                                                     | Homo sapiens |
| 10438     | C1D nuclear receptor co-repressor; similar to nuclear DNA-binding protein; similar to hCG1791993                                                                                                                                     | Homo sapiens |
| 219743    | trypsin domain containing 1                                                                                                                                                                                                          | Homo sapiens |
| 100101267 | POM121 membrane glycoprotein C; POM121 membrane glycoprotein B (pseudogene)                                                                                                                                                          | Homo sapiens |
| 729316    | POM121 membrane glycoprotein C; POM121 membrane glycoprotein B (pseudogene)                                                                                                                                                          | Homo sapiens |
| 64121     | Ras-related GTP binding C                                                                                                                                                                                                            | Homo sapiens |
| 26036     | zinc finger protein 451                                                                                                                                                                                                              | Homo sapiens |
| 503582    | arginine-fifty homeobox                                                                                                                                                                                                              | Homo sapiens |
| 23370     | Rho/Rac guanine nucleotide exchange factor (GEF) 18                                                                                                                                                                                  | Homo sapiens |
| 27332     | zinc finger protein 638                                                                                                                                                                                                              | Homo sapiens |
| 26119     | low density lipoprotein receptor adaptor protein 1                                                                                                                                                                                   | Homo sapiens |
| 81848     | sprouty homolog 4 (Drosophila)                                                                                                                                                                                                       | Homo sapiens |
| 7287      | tubby like protein 1                                                                                                                                                                                                                 | Homo sapiens |
| 10466     | component of oligomeric golgi complex 5                                                                                                                                                                                              | Homo sapiens |
| 9805      | secernin 1                                                                                                                                                                                                                           | Homo sapiens |
| 79366     | nucleosomal binding protein 1                                                                                                                                                                                                        | Homo sapiens |
| 51149     | chromosome 5 open reading frame 45                                                                                                                                                                                                   | Homo sapiens |
| 117246    | FtsJ homolog 3 (E. coli)                                                                                                                                                                                                             | Homo sapiens |
| 55790     | chondroitin sulfate N-acetylgalactosaminyltransferase 1                                                                                                                                                                              | Homo sapiens |
| 9101      | ubiquitin specific peptidase 8                                                                                                                                                                                                       | Homo sapiens |
| 83903     | germ cell associated 2 (haspin)                                                                                                                                                                                                      | Homo sapiens |
| 51230     | PHD finger protein 20                                                                                                                                                                                                                | Homo sapiens |
| 94120     | synaptotagmin-like 3                                                                                                                                                                                                                 | Homo sapiens |
| 2831      | neuropeptides B/W receptor 1                                                                                                                                                                                                         | Homo sapiens |
| 84239     | ATPase type 13A4                                                                                                                                                                                                                     | Homo sapiens |
| 283464    | glycosyltransferase 8 domain containing 3                                                                                                                                                                                            | Homo sapiens |
| 112840    | WD repeat domain 89                                                                                                                                                                                                                  | Homo sapiens |
| 4478      | moesin                                                                                                                                                                                                                               | Homo sapiens |
| 51312     | solute carrier family 25, member 37                                                                                                                                                                                                  | Homo sapiens |
| 90809     | transmembrane protein 55B                                                                                                                                                                                                            | Homo sapiens |

|        |                                                                                                                                                                                                                                                                                                                        |              |
|--------|------------------------------------------------------------------------------------------------------------------------------------------------------------------------------------------------------------------------------------------------------------------------------------------------------------------------|--------------|
| 64852  | terminal uridylyl transferase 1, U6 snRNA-specific                                                                                                                                                                                                                                                                     | Homo sapiens |
| 5889   | RAD51 homolog C ( <i>S. cerevisiae</i> )                                                                                                                                                                                                                                                                               | Homo sapiens |
| 85458  | DIX domain containing 1                                                                                                                                                                                                                                                                                                | Homo sapiens |
| 339500 | zinc finger protein 678                                                                                                                                                                                                                                                                                                | Homo sapiens |
| 60558  | GUF1 GTPase homolog ( <i>S. cerevisiae</i> )                                                                                                                                                                                                                                                                           | Homo sapiens |
| 6499   | superkiller viralicidic activity 2-like ( <i>S. cerevisiae</i> )                                                                                                                                                                                                                                                       | Homo sapiens |
| 84336  | transmembrane protein 101                                                                                                                                                                                                                                                                                              | Homo sapiens |
| 9212   | aurora kinase B                                                                                                                                                                                                                                                                                                        | Homo sapiens |
| 2589   | UDP-N-acetyl-alpha-D-galactosamine:polypeptide N-acetylgalactosaminyltransferase 13 (GalNAc-T13); UDP-N-acetyl-alpha-D-galactosamine:polypeptide N-acetylgalactosaminyltransferase 1 (GalNAc-T1)                                                                                                                       | Homo sapiens |
| 114805 | UDP-N-acetyl-alpha-D-galactosamine:polypeptide N-acetylgalactosaminyltransferase 13 (GalNAc-T13); UDP-N-acetyl-alpha-D-galactosamine:polypeptide N-acetylgalactosaminyltransferase 1 (GalNAc-T1)                                                                                                                       | Homo sapiens |
| 2019   | engrailed homeobox 1                                                                                                                                                                                                                                                                                                   | Homo sapiens |
| 51429  | sorting nexin 9                                                                                                                                                                                                                                                                                                        | Homo sapiens |
| 2444   | fyn-related kinase                                                                                                                                                                                                                                                                                                     | Homo sapiens |
| 653598 | peptidylprolyl isomerase A (cyclophilin A)-like 4E; peptidylprolyl isomerase A (cyclophilin A)-like 4G; peptidylprolyl isomerase A (cyclophilin A)-like 4F; peptidylprolyl isomerase A (cyclophilin A)-like 4A; peptidylprolyl isomerase A (cyclophilin A)-like 4C; peptidylprolyl isomerase A (cyclophilin A)-like 4B | Homo sapiens |
| 730262 | peptidylprolyl isomerase A (cyclophilin A)-like 4E; peptidylprolyl isomerase A (cyclophilin A)-like 4G; peptidylprolyl isomerase A (cyclophilin A)-like 4F; peptidylprolyl isomerase A (cyclophilin A)-like 4A; peptidylprolyl isomerase A (cyclophilin A)-like 4C; peptidylprolyl isomerase A (cyclophilin A)-like 4B | Homo sapiens |
| 644591 | peptidylprolyl isomerase A (cyclophilin A)-like 4E; peptidylprolyl isomerase A (cyclophilin A)-like 4G; peptidylprolyl isomerase A (cyclophilin A)-like 4F; peptidylprolyl isomerase A (cyclophilin A)-like 4A; peptidylprolyl isomerase A (cyclophilin A)-like 4C; peptidylprolyl isomerase A (cyclophilin A)-like 4B | Homo sapiens |
| 653505 | peptidylprolyl isomerase A (cyclophilin A)-like 4E; peptidylprolyl isomerase A (cyclophilin A)-like 4G; peptidylprolyl isomerase A (cyclophilin A)-like 4F; peptidylprolyl isomerase A (cyclophilin A)-like 4A; peptidylprolyl isomerase A (cyclophilin A)-like 4C; peptidylprolyl isomerase A (cyclophilin A)-like 4B | Homo sapiens |
| 164022 | peptidylprolyl isomerase A (cyclophilin A)-like 4E; peptidylprolyl isomerase A (cyclophilin A)-like 4G; peptidylprolyl isomerase A (cyclophilin A)-like 4F; peptidylprolyl isomerase A (cyclophilin A)-like 4A; peptidylprolyl isomerase A (cyclophilin A)-like 4C; peptidylprolyl isomerase A (cyclophilin A)-like 4B | Homo sapiens |
| 728945 | peptidylprolyl isomerase A (cyclophilin A)-like 4E; peptidylprolyl isomerase A (cyclophilin A)-like 4G; peptidylprolyl isomerase A (cyclophilin A)-like 4F; peptidylprolyl isomerase A (cyclophilin A)-like 4A; peptidylprolyl isomerase A (cyclophilin A)-like 4C; peptidylprolyl isomerase A (cyclophilin A)-like 4B | Homo sapiens |
| 4064   | CD180 molecule                                                                                                                                                                                                                                                                                                         | Homo sapiens |
| 5356   | pleiotropic regulator 1 (PRL1 homolog, <i>Arabidopsis</i> )                                                                                                                                                                                                                                                            | Homo sapiens |
| 57404  | cytochrome P450, family 20, subfamily A, polypeptide 1                                                                                                                                                                                                                                                                 | Homo sapiens |
| 548596 | creatine kinase, mitochondrial 1A; creatine kinase, mitochondrial 1B                                                                                                                                                                                                                                                   | Homo sapiens |
| 1159   | creatine kinase, mitochondrial 1A; creatine kinase, mitochondrial 1B                                                                                                                                                                                                                                                   | Homo sapiens |
| 84034  | elastin microfibril interfacer 2                                                                                                                                                                                                                                                                                       | Homo sapiens |
| 54905  | cytochrome P450, family 2, subfamily W, polypeptide 1                                                                                                                                                                                                                                                                  | Homo sapiens |
| 26031  | oxysterol binding protein-like 3                                                                                                                                                                                                                                                                                       | Homo sapiens |
| 50937  | Cdon homolog (mouse)                                                                                                                                                                                                                                                                                                   | Homo sapiens |
| 4691   | nucleolin                                                                                                                                                                                                                                                                                                              | Homo sapiens |
| 56342  | peter pan homolog ( <i>Drosophila</i> )                                                                                                                                                                                                                                                                                | Homo sapiens |
| 6299   | sal-like 1 ( <i>Drosophila</i> )                                                                                                                                                                                                                                                                                       | Homo sapiens |
| 3652   | intracisternal A particle-promoted polypeptide                                                                                                                                                                                                                                                                         | Homo sapiens |
| 5701   | proteasome (prosome, macropain) 26S subunit, ATPase, 2                                                                                                                                                                                                                                                                 | Homo sapiens |
| 27075  | tetraspanin 13                                                                                                                                                                                                                                                                                                         | Homo sapiens |
| 6919   | transcription elongation factor A (SII), 2                                                                                                                                                                                                                                                                             | Homo sapiens |
| 256815 | chromosome 10 open reading frame 67                                                                                                                                                                                                                                                                                    | Homo sapiens |
| 29796  | ubiquinol-cytochrome c reductase complex (7.2 kD)                                                                                                                                                                                                                                                                      | Homo sapiens |
| 2551   | GA binding protein transcription factor, alpha subunit 60kDa                                                                                                                                                                                                                                                           | Homo sapiens |
| 115752 | DIS3 mitotic control homolog ( <i>S. cerevisiae</i> )-like                                                                                                                                                                                                                                                             | Homo sapiens |
| 23184  | mesoderm development candidate 2                                                                                                                                                                                                                                                                                       | Homo sapiens |
| 51067  | tyrosyl-tRNA synthetase 2, mitochondrial                                                                                                                                                                                                                                                                               | Homo sapiens |
| 1289   | collagen, type V, alpha 1                                                                                                                                                                                                                                                                                              | Homo sapiens |
| 79990  | pleckstrin homology domain containing, family H (with MyTH4 domain) member 3                                                                                                                                                                                                                                           | Homo sapiens |
| 54732  | transmembrane emp24 protein transport domain containing 9                                                                                                                                                                                                                                                              | Homo sapiens |
| 91     | activin A receptor, type IB                                                                                                                                                                                                                                                                                            | Homo sapiens |
| 1509   | cathepsin D                                                                                                                                                                                                                                                                                                            | Homo sapiens |
| 29028  | ATPase family, AAA domain containing 2                                                                                                                                                                                                                                                                                 | Homo sapiens |
| 54707  | GPN-loop GTPase 2                                                                                                                                                                                                                                                                                                      | Homo sapiens |
| 23204  | ADP-ribosylation factor-like 6 interacting protein 1                                                                                                                                                                                                                                                                   | Homo sapiens |
| 637    | BH3 interacting domain death agonist                                                                                                                                                                                                                                                                                   | Homo sapiens |
| 81537  | sphingosine-1-phosphate phosphatase 1                                                                                                                                                                                                                                                                                  | Homo sapiens |
| 388336 | FLJ45455 protein                                                                                                                                                                                                                                                                                                       | Homo sapiens |
| 11072  | dual specificity phosphatase 14                                                                                                                                                                                                                                                                                        | Homo sapiens |
| 51661  | FK506 binding protein 7                                                                                                                                                                                                                                                                                                | Homo sapiens |
| 7276   | transthyretin                                                                                                                                                                                                                                                                                                          | Homo sapiens |
| 57559  | STAM binding protein-like 1                                                                                                                                                                                                                                                                                            | Homo sapiens |
| 2030   | solute carrier family 29 (nucleoside transporters), member 1                                                                                                                                                                                                                                                           | Homo sapiens |

|           |                                                                                                                                                                            |              |
|-----------|----------------------------------------------------------------------------------------------------------------------------------------------------------------------------|--------------|
| 57224     | NHS-like 1                                                                                                                                                                 | Homo sapiens |
| 54900     | lymphocyte transmembrane adaptor 1                                                                                                                                         | Homo sapiens |
| 23608     | makorin ring finger protein pseudogene 6; makorin ring finger protein 1                                                                                                    | Homo sapiens |
| 400058    | makorin ring finger protein pseudogene 6; makorin ring finger protein 1                                                                                                    | Homo sapiens |
| 79230     | zinc finger protein 557                                                                                                                                                    | Homo sapiens |
| 53944     | casein kinase 1, gamma 1                                                                                                                                                   | Homo sapiens |
| 55244     | solute carrier family 47, member 1                                                                                                                                         | Homo sapiens |
| 6760      | synovial sarcoma translocation, chromosome 18                                                                                                                              | Homo sapiens |
| 22826     | DnaJ (Hsp40) homolog, subfamily C, member 8                                                                                                                                | Homo sapiens |
| 5789      | protein tyrosine phosphatase, receptor type, D                                                                                                                             | Homo sapiens |
| 57157     | putative homeodomain transcription factor 2                                                                                                                                | Homo sapiens |
| 65977     | pleckstrin homology domain containing, family A (phosphoinositide binding specific) member 3                                                                               | Homo sapiens |
| 128       | alcohol dehydrogenase 5 (class III), chi polypeptide, pseudogene 4; alcohol dehydrogenase 5 (class III), chi polypeptide                                                   | Homo sapiens |
| 642443    | alcohol dehydrogenase 5 (class III), chi polypeptide, pseudogene 4; alcohol dehydrogenase 5 (class III), chi polypeptide                                                   | Homo sapiens |
| 5515      | protein phosphatase 2 (formerly 2A), catalytic subunit, alpha isoform                                                                                                      | Homo sapiens |
| 30833     | 5', 3'-nucleotidase, cytosolic                                                                                                                                             | Homo sapiens |
| 221687    | ring finger protein 182                                                                                                                                                    | Homo sapiens |
| 9869      | SET domain, bifurcated 1                                                                                                                                                   | Homo sapiens |
| 8655      | dynein, light chain, LC8-type 1                                                                                                                                            | Homo sapiens |
| 57161     | pellino homolog 2 (Drosophila)                                                                                                                                             | Homo sapiens |
| 818       | calcium/calmodulin-dependent protein kinase II gamma                                                                                                                       | Homo sapiens |
| 83986     | integrin alpha FG-GAP repeat containing 3                                                                                                                                  | Homo sapiens |
| 5685      | proteasome (prosome, macropain) subunit, alpha type, 4                                                                                                                     | Homo sapiens |
| 81567     | thioredoxin domain containing 5 (endoplasmic reticulum); muted homolog (mouse)                                                                                             | Homo sapiens |
| 63915     | thioredoxin domain containing 5 (endoplasmic reticulum); muted homolog (mouse)                                                                                             | Homo sapiens |
| 9328      | general transcription factor IIIC, polypeptide 5, 63kDa                                                                                                                    | Homo sapiens |
| 8614      | stanniocalcin 2                                                                                                                                                            | Homo sapiens |
| 9254      | calcium channel, voltage-dependent, alpha 2/delta subunit 2                                                                                                                | Homo sapiens |
| 11216     | A kinase (PRKA) anchor protein 10                                                                                                                                          | Homo sapiens |
| 81570     | ClpB caseinolytic peptidase B homolog (E. coli)                                                                                                                            | Homo sapiens |
| 3035      | histidyl-tRNA synthetase                                                                                                                                                   | Homo sapiens |
| 222194    | round spermatid basic protein 1-like                                                                                                                                       | Homo sapiens |
| 27000     | DnaJ (Hsp40) homolog, subfamily C, member 2                                                                                                                                | Homo sapiens |
| 442454    | similar to ubiquinol-cytochrome c reductase binding protein; ubiquinol-cytochrome c reductase binding protein pseudogene; ubiquinol-cytochrome c reductase binding protein | Homo sapiens |
| 727947    | similar to ubiquinol-cytochrome c reductase binding protein; ubiquinol-cytochrome c reductase binding protein pseudogene; ubiquinol-cytochrome c reductase binding protein | Homo sapiens |
| 7381      | similar to ubiquinol-cytochrome c reductase binding protein; ubiquinol-cytochrome c reductase binding protein pseudogene; ubiquinol-cytochrome c reductase binding protein | Homo sapiens |
| 9928      | kinesin family member 14                                                                                                                                                   | Homo sapiens |
| 100128046 | hypothetical LOC100128046                                                                                                                                                  | Homo sapiens |
| 81552     | similar to EGFR-coamplified and overexpressed protein; EGFR-coamplified and overexpressed protein                                                                          | Homo sapiens |
| 729086    | similar to EGFR-coamplified and overexpressed protein; EGFR-coamplified and overexpressed protein                                                                          | Homo sapiens |
| 9377      | cytochrome c oxidase subunit Va                                                                                                                                            | Homo sapiens |
| 84287     | zinc finger, DHHC-type containing 16                                                                                                                                       | Homo sapiens |
| 23082     | peroxisome proliferator-activated receptor gamma, coactivator-related 1                                                                                                    | Homo sapiens |
| 54874     | formin binding protein 1-like                                                                                                                                              | Homo sapiens |
| 54921     | CTF8, chromosome transmission fidelity factor 8 homolog (S. cerevisiae)                                                                                                    | Homo sapiens |
| 60528     | elaC homolog 2 (E. coli)                                                                                                                                                   | Homo sapiens |
| 51316     | placenta-specific 8                                                                                                                                                        | Homo sapiens |
| 5965      | RecQ protein-like (DNA helicase Q1-like)                                                                                                                                   | Homo sapiens |
| 54778     | ring finger protein 111                                                                                                                                                    | Homo sapiens |
| 139818    | dedicator of cytokinesis 11                                                                                                                                                | Homo sapiens |
| 5742      | prostaglandin-endoperoxide synthase 1 (prostaglandin G/H synthase and cyclooxygenase)                                                                                      | Homo sapiens |
| 284467    | family with sequence similarity 19 (chemokine (C-C motif)-like), member A3                                                                                                 | Homo sapiens |
| 54882     | ankyrin repeat and KH domain containing 1; ANKHD1-EIF4EBP3 readthrough transcript; eukaryotic translation initiation factor 4E binding protein 3                           | Homo sapiens |
| 8637      | ankyrin repeat and KH domain containing 1; ANKHD1-EIF4EBP3 readthrough transcript; eukaryotic translation initiation factor 4E binding protein 3                           | Homo sapiens |
| 404734    | ankyrin repeat and KH domain containing 1; ANKHD1-EIF4EBP3 readthrough transcript; eukaryotic translation initiation factor 4E binding protein 3                           | Homo sapiens |
| 65986     | zinc finger and BTB domain containing 10                                                                                                                                   | Homo sapiens |
| 84376     | hook homolog 3 (Drosophila)                                                                                                                                                | Homo sapiens |
| 374655    | zinc finger protein 710                                                                                                                                                    | Homo sapiens |
| 4609      | v-myc myelocytomatosis viral oncogene homolog (avian)                                                                                                                      | Homo sapiens |
| 23126     | pogo transposable element with ZNF domain                                                                                                                                  | Homo sapiens |
| 6730      | signal recognition particle 68kDa                                                                                                                                          | Homo sapiens |
| 31        | acetyl-Coenzyme A carboxylase alpha                                                                                                                                        | Homo sapiens |
| 26172     | chromosome 3 open reading frame 41; hypothetical protein LOC729085                                                                                                         | Homo sapiens |
| 729085    | chromosome 3 open reading frame 41; hypothetical protein LOC729085                                                                                                         | Homo sapiens |
| 8563      | THO complex 5                                                                                                                                                              | Homo sapiens |
| 116987    | ArfGAP with GTPase domain, ankyrin repeat and PH domain 1                                                                                                                  | Homo sapiens |
| 84926     | SPRY domain containing 3                                                                                                                                                   | Homo sapiens |
| 55131     | RNA binding motif protein 28                                                                                                                                               | Homo sapiens |

|           |                                                                                                                                                                     |              |
|-----------|---------------------------------------------------------------------------------------------------------------------------------------------------------------------|--------------|
| 51015     | isochorismatase domain containing 1                                                                                                                                 | Homo sapiens |
| 654790    | Purkinje cell protein 4 like 1                                                                                                                                      | Homo sapiens |
| 51690     | LSM7 homolog, U6 small nuclear RNA associated (S. cerevisiae)                                                                                                       | Homo sapiens |
| 9925      | zinc finger and BTB domain containing 5                                                                                                                             | Homo sapiens |
| 586       | branched chain aminotransferase 1, cytosolic                                                                                                                        | Homo sapiens |
| 6624      | fascin homolog 1, actin-bundling protein (Strongylocentrotus purpuratus)                                                                                            | Homo sapiens |
| 154007    | small nuclear ribonucleoprotein 48kDa (U11/U12)                                                                                                                     | Homo sapiens |
| 132946    | ADP-ribosylation factor-like 9                                                                                                                                      | Homo sapiens |
| 6392      | similar to succinate dehydrogenase complex, subunit D, integral membrane protein; succinate dehydrogenase complex, subunit D, integral membrane protein             | Homo sapiens |
| 100130320 | similar to succinate dehydrogenase complex, subunit D, integral membrane protein; succinate dehydrogenase complex, subunit D, integral membrane protein             | Homo sapiens |
| 8242      | lysine (K)-specific demethylase 5C                                                                                                                                  | Homo sapiens |
| 79068     | fat mass and obesity associated                                                                                                                                     | Homo sapiens |
| 55423     | signal-regulatory protein gamma                                                                                                                                     | Homo sapiens |
| 2018      | empty spiracles homeobox 2                                                                                                                                          | Homo sapiens |
| 9830      | tripartite motif-containing 14                                                                                                                                      | Homo sapiens |
| 51602     | NOP58 ribonucleoprotein homolog (yeast)                                                                                                                             | Homo sapiens |
| 9902      | mannose receptor, C type 2                                                                                                                                          | Homo sapiens |
| 171017    | zinc finger protein 384                                                                                                                                             | Homo sapiens |
| 2774      | guanine nucleotide binding protein (G protein), alpha activating activity polypeptide, olfactory type                                                               | Homo sapiens |
| 4512      | Cytochrome c oxidase subunit 1                                                                                                                                      | Homo sapiens |
| 6775083   | Cytochrome c oxidase subunit 1                                                                                                                                      | Homo sapiens |
| 23197     | Fas associated factor family member 2                                                                                                                               | Homo sapiens |
| 80232     | WD repeat domain 26                                                                                                                                                 | Homo sapiens |
| 55623     | THUMP domain containing 1                                                                                                                                           | Homo sapiens |
| 23636     | nucleoporin 62kDa                                                                                                                                                   | Homo sapiens |
| 4088      | SMAD family member 3                                                                                                                                                | Homo sapiens |
| 6789      | serine/threonine kinase 4                                                                                                                                           | Homo sapiens |
| 730052    | ubiquitin-conjugating enzyme E2 variant 1; ubiquitin-conjugating enzyme E2 variant 1 pseudogene 2; transmembrane protein 189; TMEM189-UBE2V1 readthrough transcript | Homo sapiens |
| 7335      | ubiquitin-conjugating enzyme E2 variant 1; ubiquitin-conjugating enzyme E2 variant 1 pseudogene 2; transmembrane protein 189; TMEM189-UBE2V1 readthrough transcript | Homo sapiens |
| 387521    | ubiquitin-conjugating enzyme E2 variant 1; ubiquitin-conjugating enzyme E2 variant 1 pseudogene 2; transmembrane protein 189; TMEM189-UBE2V1 readthrough transcript | Homo sapiens |
| 387522    | ubiquitin-conjugating enzyme E2 variant 1; ubiquitin-conjugating enzyme E2 variant 1 pseudogene 2; transmembrane protein 189; TMEM189-UBE2V1 readthrough transcript | Homo sapiens |
| 392       | Rho GTPase activating protein 1                                                                                                                                     | Homo sapiens |
| 284323    | zinc finger protein 780A                                                                                                                                            | Homo sapiens |
| 1742      | discs, large homolog 4 (Drosophila)                                                                                                                                 | Homo sapiens |
| 56655     | polymerase (DNA-directed), epsilon 4 (p12 subunit)                                                                                                                  | Homo sapiens |
| 84879     | major facilitator superfamily domain containing 2                                                                                                                   | Homo sapiens |
| 91574     | chromosome 12 open reading frame 65                                                                                                                                 | Homo sapiens |
| 10318     | TNFAIP3 interacting protein 1                                                                                                                                       | Homo sapiens |
| 8662      | eukaryotic translation initiation factor 3, subunit B                                                                                                               | Homo sapiens |
| 55621     | TRM1 tRNA methyltransferase 1 homolog (S. cerevisiae)                                                                                                               | Homo sapiens |
| 9807      | inositol hexakisphosphate kinase 1                                                                                                                                  | Homo sapiens |
| 79180     | EF-hand domain family, member D2                                                                                                                                    | Homo sapiens |
| 57191     | vomer nasal 1 receptor 1                                                                                                                                            | Homo sapiens |
| 26190     | F-box and WD repeat domain containing 2                                                                                                                             | Homo sapiens |
| 10577     | Niemann-Pick disease, type C2                                                                                                                                       | Homo sapiens |
| 11180     | WD repeat domain 6                                                                                                                                                  | Homo sapiens |
| 10335     | murine retrovirus integration site 1 homolog                                                                                                                        | Homo sapiens |
| 6009      | Ras homolog enriched in brain                                                                                                                                       | Homo sapiens |
| 905       | cyclin T2                                                                                                                                                           | Homo sapiens |
| 7008      | thyrotrophic embryonic factor                                                                                                                                       | Homo sapiens |
| 345651    | actin, beta-like 2                                                                                                                                                  | Homo sapiens |
| 159090    | family with sequence similarity 122B                                                                                                                                | Homo sapiens |
| 84295     | PHD finger protein 6                                                                                                                                                | Homo sapiens |
| 80173     | intraflagellar transport 74 homolog (Chlamydomonas)                                                                                                                 | Homo sapiens |
| 5426      | polymerase (DNA directed), epsilon                                                                                                                                  | Homo sapiens |
| 58526     | MID1 interacting protein 1 (gastrulation specific G12 homolog (zebrafish))                                                                                          | Homo sapiens |
| 56137     | protocadherin alpha 12                                                                                                                                              | Homo sapiens |
| 27180     | sialic acid binding Ig-like lectin 9                                                                                                                                | Homo sapiens |
| 863       | core-binding factor, runt domain, alpha subunit 2; translocated to, 3                                                                                               | Homo sapiens |
| 115908    | collagen triple helix repeat containing 1                                                                                                                           | Homo sapiens |
| 55696     | RNA binding motif protein 22                                                                                                                                        | Homo sapiens |
| 6004      | regulator of G-protein signaling 16                                                                                                                                 | Homo sapiens |
| 4277      | MHC class I polypeptide-related sequence B                                                                                                                          | Homo sapiens |
| 4958      | osteomodulin                                                                                                                                                        | Homo sapiens |
| 26034     | interaction protein for cytohesin exchange factors 1                                                                                                                | Homo sapiens |
| 150350    | ENTH domain containing 1                                                                                                                                            | Homo sapiens |
| 57132     | chromatin modifying protein 1B                                                                                                                                      | Homo sapiens |
| 84883     | apoptosis-inducing factor, mitochondrion-associated, 2                                                                                                              | Homo sapiens |
| 57710     | KIAA1614                                                                                                                                                            | Homo sapiens |
| 6895      | TAR (HIV-1) RNA binding protein 2                                                                                                                                   | Homo sapiens |
| 10452     | translocase of outer mitochondrial membrane 40 homolog (yeast)                                                                                                      | Homo sapiens |
| 57120     | golgi associated PDZ and coiled-coil motif containing                                                                                                               | Homo sapiens |

|           |                                                                                                                             |              |
|-----------|-----------------------------------------------------------------------------------------------------------------------------|--------------|
| 2274      | four and a half LIM domains 2                                                                                               | Homo sapiens |
| 2252      | hypothetical LOC100132771; fibroblast growth factor 7 (keratinocyte growth factor); fibroblast growth factor 7 pseudogene 2 | Homo sapiens |
| 100132771 | hypothetical LOC100132771; fibroblast growth factor 7 (keratinocyte growth factor); fibroblast growth factor 7 pseudogene 2 | Homo sapiens |
| 394217    | hypothetical LOC100132771; fibroblast growth factor 7 (keratinocyte growth factor); fibroblast growth factor 7 pseudogene 2 | Homo sapiens |
| 7529      | tyrosine 3-monooxygenase/tryptophan 5-monooxygenase activation protein, beta polypeptide                                    | Homo sapiens |
| 9024      | BR serine/threonine kinase 2                                                                                                | Homo sapiens |
| 51669     | transmembrane protein 66                                                                                                    | Homo sapiens |
| 9144      | synaptogyrin 2                                                                                                              | Homo sapiens |
| 5205      | ATPase, class I, type 8B, member 1                                                                                          | Homo sapiens |
| 123879    | DCN1, defective in cullin neddylation 1, domain containing 3 ( <i>S. cerevisiae</i> )                                       | Homo sapiens |
| 2960      | general transcription factor IIE, polypeptide 1, alpha 56kDa                                                                | Homo sapiens |
| 221079    | ADP-ribosylation factor-like 5B                                                                                             | Homo sapiens |
| 6601      | SWI/SNF related, matrix associated, actin dependent regulator of chromatin, subfamily c, member 2                           | Homo sapiens |
| 1054      | CCAAT/enhancer binding protein (C/EBP), gamma                                                                               | Homo sapiens |
| 811       | calreticulin                                                                                                                | Homo sapiens |
| 11116     | FGFR1 oncogene partner                                                                                                      | Homo sapiens |
| 10049     | DnaJ (Hsp40) homolog, subfamily B, member 6                                                                                 | Homo sapiens |
| 1028      | cyclin-dependent kinase inhibitor 1C (p57, Kip2)                                                                            | Homo sapiens |
| 5520      | protein phosphatase 2 (formerly 2A), regulatory subunit B, alpha isoform                                                    | Homo sapiens |
| 29115     | SAP30 binding protein                                                                                                       | Homo sapiens |
| 219931    | two pore segment channel 2                                                                                                  | Homo sapiens |
| 376497    | solute carrier family 27 (fatty acid transporter), member 1                                                                 | Homo sapiens |
| 9957      | heparan sulfate (glucosamine) 3-O-sulfotransferase 1                                                                        | Homo sapiens |
| 55505     | NOP10 ribonucleoprotein homolog (yeast)                                                                                     | Homo sapiens |
| 103       | adenosine deaminase, RNA-specific                                                                                           | Homo sapiens |
| 196441    | zinc finger, C3H1-type containing                                                                                           | Homo sapiens |
| 161003    | stomatin (EPB72)-like 3                                                                                                     | Homo sapiens |
| 8277      | transketolase-like 1                                                                                                        | Homo sapiens |
| 83857     | transmembrane and tetratricopeptide repeat containing 1                                                                     | Homo sapiens |
| 57412     | arsenic (+3 oxidation state) methyltransferase                                                                              | Homo sapiens |
| 54467     | ankyrin repeat and IBR domain containing 1                                                                                  | Homo sapiens |
| 119504    | chromosome 10 open reading frame 104                                                                                        | Homo sapiens |
| 10959     | transmembrane emp24 domain trafficking protein 2                                                                            | Homo sapiens |
| 79591     | chromosome 10 open reading frame 76                                                                                         | Homo sapiens |
| 57111     | RAB25, member RAS oncogene family                                                                                           | Homo sapiens |
| 2128      | even-skipped homeobox 1                                                                                                     | Homo sapiens |
| 23308     | inducible T-cell co-stimulator ligand                                                                                       | Homo sapiens |
| 90649     | zinc finger protein 486                                                                                                     | Homo sapiens |
| 2580      | cyclin G associated kinase                                                                                                  | Homo sapiens |
| 3337      | DnaJ (Hsp40) homolog, subfamily B, member 1                                                                                 | Homo sapiens |
| 26284     | Era G-protein-like 1 ( <i>E. coli</i> )                                                                                     | Homo sapiens |
| 1073      | cofilin 2 (muscle)                                                                                                          | Homo sapiens |
| 23677     | SH3-domain binding protein 4                                                                                                | Homo sapiens |
| 65979     | phosphatase and actin regulator 4                                                                                           | Homo sapiens |
| 56260     | chromosome 8 open reading frame 44                                                                                          | Homo sapiens |
| 5071      | Parkinson disease (autosomal recessive, juvenile) 2, parkin                                                                 | Homo sapiens |
| 55074     | oxidation resistance 1                                                                                                      | Homo sapiens |
| 2531      | 3-ketodihydrospingosine reductase                                                                                           | Homo sapiens |
| 6341      | SCO cytochrome oxidase deficient homolog 1 (yeast)                                                                          | Homo sapiens |
| 7023      | transcription factor AP-4 (activating enhancer binding protein 4)                                                           | Homo sapiens |
| 410       | arylsulfatase A                                                                                                             | Homo sapiens |
| 6821      | sulfite oxidase                                                                                                             | Homo sapiens |
| 2235      | ferrochelatase (protoporphyrin)                                                                                             | Homo sapiens |
| 127833    | synaptotagmin II                                                                                                            | Homo sapiens |
| 55860     | actin-related protein 10 homolog ( <i>S. cerevisiae</i> )                                                                   | Homo sapiens |
| 7326      | ubiquitin-conjugating enzyme E2G 1 (UBC7 homolog, yeast)                                                                    | Homo sapiens |
| 23061     | TBC1 domain family, member 9B (with GRAM domain)                                                                            | Homo sapiens |
| 355       | Fas (TNF receptor superfamily, member 6)                                                                                    | Homo sapiens |
| 55234     | smu-1 suppressor of mec-8 and unc-52 homolog ( <i>C. elegans</i> )                                                          | Homo sapiens |
| 23252     | OTU domain containing 3                                                                                                     | Homo sapiens |
| 10606     | phosphoribosylaminoimidazole carboxylase, phosphoribosylaminoimidazole succinocarboxamide synthetase                        | Homo sapiens |
| 729789    | ribosomal protein S15 pseudogene 5; ribosomal protein S15                                                                   | Homo sapiens |
| 6209      | ribosomal protein S15 pseudogene 5; ribosomal protein S15                                                                   | Homo sapiens |
| 1523      | cut-like homeobox 1                                                                                                         | Homo sapiens |
| 9666      | DAZ interacting protein 3, zinc finger                                                                                      | Homo sapiens |
| 22848     | AP2 associated kinase 1                                                                                                     | Homo sapiens |
| 10908     | patatin-like phospholipase domain containing 6                                                                              | Homo sapiens |
| 9232      | pituitary tumor-transforming 1; pituitary tumor-transforming 2                                                              | Homo sapiens |
| 10744     | pituitary tumor-transforming 1; pituitary tumor-transforming 2                                                              | Homo sapiens |
| 64145     | zinc finger, FYVE domain containing 20                                                                                      | Homo sapiens |
| 64718     | unkempt homolog ( <i>Drosophila</i> )-like                                                                                  | Homo sapiens |
| 8139      | gigaxonin                                                                                                                   | Homo sapiens |
| 901       | cyclin G2                                                                                                                   | Homo sapiens |
| 56203     | leiomodulin 3 (fetal)                                                                                                       | Homo sapiens |



|           |                                                                                                                                       |              |
|-----------|---------------------------------------------------------------------------------------------------------------------------------------|--------------|
| 23214     | exportin 6                                                                                                                            | Homo sapiens |
| 140609    | NIMA (never in mitosis gene a)-related kinase 7                                                                                       | Homo sapiens |
| 57534     | mindbomb homolog 1 (Drosophila)                                                                                                       | Homo sapiens |
| 255738    | proprotein convertase subtilisin/kexin type 9                                                                                         | Homo sapiens |
| 21        | ATP-binding cassette, sub-family A (ABC1), member 3                                                                                   | Homo sapiens |
| 57158     | junctophilin 2                                                                                                                        | Homo sapiens |
| 150465    | tubulin tyrosine ligase                                                                                                               | Homo sapiens |
| 8490      | regulator of G-protein signaling 5                                                                                                    | Homo sapiens |
| 27043     | proline, glutamate and leucine rich protein 1                                                                                         | Homo sapiens |
| 645369    | two transmembrane domain family member A                                                                                              | Homo sapiens |
| 3006      | histone cluster 1, H1c                                                                                                                | Homo sapiens |
| 4681      | neuroblastoma, suppression of tumorigenicity 1                                                                                        | Homo sapiens |
| 85376     | RIMS binding protein 3B; RIMS binding protein 3C; RIMS binding protein 3                                                              | Homo sapiens |
| 150221    | RIMS binding protein 3B; RIMS binding protein 3C; RIMS binding protein 3                                                              | Homo sapiens |
| 440804    | RIMS binding protein 3B; RIMS binding protein 3C; RIMS binding protein 3                                                              | Homo sapiens |
| 93621     | Mof4 family associated protein 1                                                                                                      | Homo sapiens |
| 255231    | mucolipin 2                                                                                                                           | Homo sapiens |
| 11337     | GABA(A) receptor-associated protein                                                                                                   | Homo sapiens |
| 54888     | NOL1/NOP2/Sun domain family, member 2                                                                                                 | Homo sapiens |
| 100132308 | solute carrier family 29 (nucleoside transporters), member 4; similar to solute carrier family 29 (nucleoside transporters), member 4 | Homo sapiens |
| 402509    | solute carrier family 29 (nucleoside transporters), member 4; similar to solute carrier family 29 (nucleoside transporters), member 4 | Homo sapiens |
| 222962    | solute carrier family 29 (nucleoside transporters), member 4; similar to solute carrier family 29 (nucleoside transporters), member 4 | Homo sapiens |
| 969       | CD69 molecule                                                                                                                         | Homo sapiens |
| 767       | carbonic anhydrase VIII                                                                                                               | Homo sapiens |
| 79915     | ATPase family, AAA domain containing 5                                                                                                | Homo sapiens |
| 3182      | heterogeneous nuclear ribonucleoprotein A/B                                                                                           | Homo sapiens |
| 23576     | dimethylarginine dimethylaminohydrolase 1                                                                                             | Homo sapiens |
| 9950      | golgi autoantigen, golgin subfamily a, 5                                                                                              | Homo sapiens |
| 387254    | SLC7A5 pseudogene                                                                                                                     | Homo sapiens |
| 26039     | synovial sarcoma translocation gene on chromosome 18-like 1                                                                           | Homo sapiens |
| 375056    | melanoma inhibitory activity family, member 3                                                                                         | Homo sapiens |
| 650       | bone morphogenetic protein 2                                                                                                          | Homo sapiens |
| 2760      | GM2 ganglioside activator                                                                                                             | Homo sapiens |
| 2186      | bromodomain PHD finger transcription factor                                                                                           | Homo sapiens |
| 826       | calpain, small subunit 1                                                                                                              | Homo sapiens |
| 1019      | cyclin-dependent kinase 4                                                                                                             | Homo sapiens |
| 84440     | RAB11 family interacting protein 4 (class II)                                                                                         | Homo sapiens |
| 149420    | PDLIM1 interacting kinase 1 like                                                                                                      | Homo sapiens |
| 55204     | golgi phosphoprotein 3-like                                                                                                           | Homo sapiens |
| 54890     | alkB, alkylation repair homolog 5 (E. coli)                                                                                           | Homo sapiens |
| 79814     | agmatine ureohydrolase (agmatinase)                                                                                                   | Homo sapiens |
| 5479      | peptidylprolyl isomerase B (cyclophilin B)                                                                                            | Homo sapiens |
| 6536      | solute carrier family 6 (neurotransmitter transporter, glycine), member 9                                                             | Homo sapiens |
| 10813     | UTP14, U3 small nucleolar ribonucleoprotein, homolog A (yeast)                                                                        | Homo sapiens |
| 60481     | ELOVL family member 5, elongation of long chain fatty acids (FEN1/Elo2, SUR4/Elo3-like, yeast)                                        | Homo sapiens |
| 10336     | polycomb group ring finger 3                                                                                                          | Homo sapiens |
| 10910     | SGT1, suppressor of G2 allele of SKP1 (S. cerevisiae)                                                                                 | Homo sapiens |
| 4216      | mitogen-activated protein kinase kinase kinase 4                                                                                      | Homo sapiens |
| 8338      | histone cluster 2, H2ac                                                                                                               | Homo sapiens |
| 80142     | prostaglandin E synthase 2                                                                                                            | Homo sapiens |
| 8161      | coilin                                                                                                                                | Homo sapiens |
| 65084     | transmembrane protein 135                                                                                                             | Homo sapiens |
| 7100      | toll-like receptor 5                                                                                                                  | Homo sapiens |
| 7408      | vasodilator-stimulated phosphoprotein                                                                                                 | Homo sapiens |
| 5290      | phosphoinositide-3-kinase, catalytic, alpha polypeptide                                                                               | Homo sapiens |
| 56990     | CDC42 small effector 2                                                                                                                | Homo sapiens |
| 54617     | INO80 homolog (S. cerevisiae)                                                                                                         | Homo sapiens |
| 1877      | E4F transcription factor 1                                                                                                            | Homo sapiens |
| 54566     | erythrocyte membrane protein band 4.1 like 4B                                                                                         | Homo sapiens |
| 10625     | influenza virus NS1A binding protein                                                                                                  | Homo sapiens |
| 163227    | zinc finger protein 100                                                                                                               | Homo sapiens |
| 22824     | heat shock 70kDa protein 4-like                                                                                                       | Homo sapiens |
| 81669     | cyclin L2; chemokine (C-C motif) receptor 6                                                                                           | Homo sapiens |
| 1235      | cyclin L2; chemokine (C-C motif) receptor 6                                                                                           | Homo sapiens |
| 51433     | anaphase promoting complex subunit 5                                                                                                  | Homo sapiens |
| 56904     | SH3-domain GRB2-like endophilin B2                                                                                                    | Homo sapiens |
| 8992      | ATPase, H+ transporting, lysosomal 9kDa, VO subunit e1                                                                                | Homo sapiens |
| 6712      | spectrin, beta, non-erythrocytic 2                                                                                                    | Homo sapiens |
| 55789     | DEP domain containing 1B                                                                                                              | Homo sapiens |
| 9601      | protein disulfide isomerase family A, member 4                                                                                        | Homo sapiens |
| 2064      | v-erb-b2 erythroblastic leukemia viral oncogene homolog 2, neuro/glioblastoma derived oncogene homolog (avian)                        | Homo sapiens |
| 283899    | INO80 complex subunit E                                                                                                               | Homo sapiens |
| 84069     | pleckstrin homology domain containing, family N member 1                                                                              | Homo sapiens |
| 28512     | NFKB inhibitor interacting Ras-like 1                                                                                                 | Homo sapiens |

|           |                                                                                                                                                                                                                                                                                                                                               |              |
|-----------|-----------------------------------------------------------------------------------------------------------------------------------------------------------------------------------------------------------------------------------------------------------------------------------------------------------------------------------------------|--------------|
| 6880      | TAF9 RNA polymerase II, TATA box binding protein (TBP)-associated factor, 32kDa                                                                                                                                                                                                                                                               | Homo sapiens |
| 126917    | intermediate filament family orphan 2                                                                                                                                                                                                                                                                                                         | Homo sapiens |
| 80153     | enhancer of mRNA decapping 3 homolog ( <i>S. cerevisiae</i> )                                                                                                                                                                                                                                                                                 | Homo sapiens |
| 84515     | minichromosome maintenance complex component 8                                                                                                                                                                                                                                                                                                | Homo sapiens |
| 1581      | cytochrome P450, family 7, subfamily A, polypeptide 1                                                                                                                                                                                                                                                                                         | Homo sapiens |
| 5828      | peroxisomal membrane protein 3, 35kDa                                                                                                                                                                                                                                                                                                         | Homo sapiens |
| 64837     | kinesin light chain 2                                                                                                                                                                                                                                                                                                                         | Homo sapiens |
| 54626     | hairy and enhancer of split 2 ( <i>Drosophila</i> )                                                                                                                                                                                                                                                                                           | Homo sapiens |
| 283554    | G protein-coupled receptor 137C                                                                                                                                                                                                                                                                                                               | Homo sapiens |
| 85406     | DnaJ (Hsp40) homolog, subfamily C, member 14                                                                                                                                                                                                                                                                                                  | Homo sapiens |
| 10732     | transcription factor-like 5 (basic helix-loop-helix)                                                                                                                                                                                                                                                                                          | Homo sapiens |
| 10767     | HBS1-like ( <i>S. cerevisiae</i> )                                                                                                                                                                                                                                                                                                            | Homo sapiens |
| 23774     | bromodomain containing 1                                                                                                                                                                                                                                                                                                                      | Homo sapiens |
| 4801      | nuclear transcription factor Y, beta                                                                                                                                                                                                                                                                                                          | Homo sapiens |
| 832       | capping protein (actin filament) muscle Z-line, beta                                                                                                                                                                                                                                                                                          | Homo sapiens |
| 55585     | ubiquitin-conjugating enzyme E2Q family member 1                                                                                                                                                                                                                                                                                              | Homo sapiens |
| 89910     | ubiquitin protein ligase E3B                                                                                                                                                                                                                                                                                                                  | Homo sapiens |
| 128178    | EDAR-associated death domain                                                                                                                                                                                                                                                                                                                  | Homo sapiens |
| 6885      | mitogen-activated protein kinase kinase kinase 7                                                                                                                                                                                                                                                                                              | Homo sapiens |
| 1290      | collagen, type V, alpha 2                                                                                                                                                                                                                                                                                                                     | Homo sapiens |
| 285636    | chromosome 5 open reading frame 51                                                                                                                                                                                                                                                                                                            | Homo sapiens |
| 6901      | tafazzin                                                                                                                                                                                                                                                                                                                                      | Homo sapiens |
| 25879     | WD repeats and SOF1 domain containing                                                                                                                                                                                                                                                                                                         | Homo sapiens |
| 55624     | protein O-linked mannose beta1,2-N-acetylglucosaminyltransferase                                                                                                                                                                                                                                                                              | Homo sapiens |
| 55285     | RNA binding motif protein 41                                                                                                                                                                                                                                                                                                                  | Homo sapiens |
| 940       | CD28 molecule                                                                                                                                                                                                                                                                                                                                 | Homo sapiens |
| 1455      | casein kinase 1, gamma 2                                                                                                                                                                                                                                                                                                                      | Homo sapiens |
| 9255      | aminoacyl tRNA synthetase complex-interacting multifunctional protein 1                                                                                                                                                                                                                                                                       | Homo sapiens |
| 55101     | ATP5S-like                                                                                                                                                                                                                                                                                                                                    | Homo sapiens |
| 5230      | phosphoglycerate kinase 1                                                                                                                                                                                                                                                                                                                     | Homo sapiens |
| 23499     | microtubule-actin crosslinking factor 1                                                                                                                                                                                                                                                                                                       | Homo sapiens |
| 2011      | MAP/microtubule affinity-regulating kinase 2                                                                                                                                                                                                                                                                                                  | Homo sapiens |
| 50618     | intersectin 2                                                                                                                                                                                                                                                                                                                                 | Homo sapiens |
| 7351      | uncoupling protein 2 (mitochondrial, proton carrier)                                                                                                                                                                                                                                                                                          | Homo sapiens |
| 203547    | VMA21 vacuolar H <sup>+</sup> -ATPase homolog ( <i>S. cerevisiae</i> )                                                                                                                                                                                                                                                                        | Homo sapiens |
| 56987     | bobby sox homolog ( <i>Drosophila</i> )                                                                                                                                                                                                                                                                                                       | Homo sapiens |
| 5305      | phosphatidylinositol-5-phosphate 4-kinase, type II, alpha                                                                                                                                                                                                                                                                                     | Homo sapiens |
| 80821     | DDHD domain containing 1                                                                                                                                                                                                                                                                                                                      | Homo sapiens |
| 10000     | v-akt murine thymoma viral oncogene homolog 3 (protein kinase B, gamma)                                                                                                                                                                                                                                                                       | Homo sapiens |
| 8650      | numb homolog ( <i>Drosophila</i> )                                                                                                                                                                                                                                                                                                            | Homo sapiens |
| 1654      | DEAD (Asp-Glu-Ala-Asp) box polypeptide 3, X-linked                                                                                                                                                                                                                                                                                            | Homo sapiens |
| 9369      | neurexin 3                                                                                                                                                                                                                                                                                                                                    | Homo sapiens |
| 51022     | glutaredoxin 2                                                                                                                                                                                                                                                                                                                                | Homo sapiens |
| 1717      | 7-dehydrocholesterol reductase                                                                                                                                                                                                                                                                                                                | Homo sapiens |
| 23293     | Smg-6 homolog, nonsense mediated mRNA decay factor ( <i>C. elegans</i> )                                                                                                                                                                                                                                                                      | Homo sapiens |
| 7693      | zinc finger protein 134                                                                                                                                                                                                                                                                                                                       | Homo sapiens |
| 9796      | phytanoyl-CoA 2-hydroxylase interacting protein                                                                                                                                                                                                                                                                                               | Homo sapiens |
| 79465     | UL16 binding protein 3                                                                                                                                                                                                                                                                                                                        | Homo sapiens |
| 340156    | myosin light chain kinase family, member 4                                                                                                                                                                                                                                                                                                    | Homo sapiens |
| 84196     | ubiquitin specific peptidase 48                                                                                                                                                                                                                                                                                                               | Homo sapiens |
| 123207    | chromosome 15 open reading frame 40                                                                                                                                                                                                                                                                                                           | Homo sapiens |
| 9659      | hypothetical protein LOC100134230; similar to KIAA0454 protein; similar to phosphodiesterase 4D interacting protein isoform 2; phosphodiesterase 4D interacting protein                                                                                                                                                                       | Homo sapiens |
| 100134230 | hypothetical protein LOC100134230; similar to KIAA0454 protein; similar to phosphodiesterase 4D interacting protein isoform 2; phosphodiesterase 4D interacting protein                                                                                                                                                                       | Homo sapiens |
| 727927    | hypothetical protein LOC100134230; similar to KIAA0454 protein; similar to phosphodiesterase 4D interacting protein isoform 2; phosphodiesterase 4D interacting protein                                                                                                                                                                       | Homo sapiens |
| 652164    | hypothetical protein LOC100134230; similar to KIAA0454 protein; similar to phosphodiesterase 4D interacting protein isoform 2; phosphodiesterase 4D interacting protein                                                                                                                                                                       | Homo sapiens |
| 150696    | prominin 2                                                                                                                                                                                                                                                                                                                                    | Homo sapiens |
| 121504    | histone cluster 1, H4l; histone cluster 1, H4k; histone cluster 4, H4; histone cluster 1, H4h; histone cluster 1, H4j; histone cluster 1, H4i; histone cluster 1, H4d; histone cluster 1, H4c; histone cluster 1, H4f; histone cluster 1, H4e; histone cluster 1, H4b; histone cluster 1, H4a; histone cluster 2, H4a; histone cluster 2, H4b | Homo sapiens |
| 8364      | histone cluster 1, H4l; histone cluster 1, H4k; histone cluster 4, H4; histone cluster 1, H4h; histone cluster 1, H4j; histone cluster 1, H4i; histone cluster 1, H4d; histone cluster 1, H4c; histone cluster 1, H4f; histone cluster 1, H4e; histone cluster 1, H4b; histone cluster 1, H4a; histone cluster 2, H4a; histone cluster 2, H4b | Homo sapiens |
| 8365      | histone cluster 1, H4l; histone cluster 1, H4k; histone cluster 4, H4; histone cluster 1, H4h; histone cluster 1, H4j; histone cluster 1, H4i; histone cluster 1, H4d; histone cluster 1, H4c; histone cluster 1, H4f; histone cluster 1, H4e; histone cluster 1, H4b; histone cluster 1, H4a; histone cluster 2, H4a; histone cluster 2, H4b | Homo sapiens |

|           |                                                                                                                                                                                                                                                                                                                                               |              |
|-----------|-----------------------------------------------------------------------------------------------------------------------------------------------------------------------------------------------------------------------------------------------------------------------------------------------------------------------------------------------|--------------|
| 8368      | histone cluster 1, H4l; histone cluster 1, H4k; histone cluster 4, H4; histone cluster 1, H4h; histone cluster 1, H4j; histone cluster 1, H4i; histone cluster 1, H4d; histone cluster 1, H4c; histone cluster 1, H4f; histone cluster 1, H4e; histone cluster 1, H4b; histone cluster 1, H4a; histone cluster 2, H4a; histone cluster 2, H4b | Homo sapiens |
| 554313    | histone cluster 1, H4l; histone cluster 1, H4k; histone cluster 4, H4; histone cluster 1, H4h; histone cluster 1, H4j; histone cluster 1, H4i; histone cluster 1, H4d; histone cluster 1, H4c; histone cluster 1, H4f; histone cluster 1, H4e; histone cluster 1, H4b; histone cluster 1, H4a; histone cluster 2, H4a; histone cluster 2, H4b | Homo sapiens |
| 8359      | histone cluster 1, H4l; histone cluster 1, H4k; histone cluster 4, H4; histone cluster 1, H4h; histone cluster 1, H4j; histone cluster 1, H4i; histone cluster 1, H4d; histone cluster 1, H4c; histone cluster 1, H4f; histone cluster 1, H4e; histone cluster 1, H4b; histone cluster 1, H4a; histone cluster 2, H4a; histone cluster 2, H4b | Homo sapiens |
| 8366      | histone cluster 1, H4l; histone cluster 1, H4k; histone cluster 4, H4; histone cluster 1, H4h; histone cluster 1, H4j; histone cluster 1, H4i; histone cluster 1, H4d; histone cluster 1, H4c; histone cluster 1, H4f; histone cluster 1, H4e; histone cluster 1, H4b; histone cluster 1, H4a; histone cluster 2, H4a; histone cluster 2, H4b | Homo sapiens |
| 8361      | histone cluster 1, H4l; histone cluster 1, H4k; histone cluster 4, H4; histone cluster 1, H4h; histone cluster 1, H4j; histone cluster 1, H4i; histone cluster 1, H4d; histone cluster 1, H4c; histone cluster 1, H4f; histone cluster 1, H4e; histone cluster 1, H4b; histone cluster 1, H4a; histone cluster 2, H4a; histone cluster 2, H4b | Homo sapiens |
| 8294      | histone cluster 1, H4l; histone cluster 1, H4k; histone cluster 4, H4; histone cluster 1, H4h; histone cluster 1, H4j; histone cluster 1, H4i; histone cluster 1, H4d; histone cluster 1, H4c; histone cluster 1, H4f; histone cluster 1, H4e; histone cluster 1, H4b; histone cluster 1, H4a; histone cluster 2, H4a; histone cluster 2, H4b | Homo sapiens |
| 8367      | histone cluster 1, H4l; histone cluster 1, H4k; histone cluster 4, H4; histone cluster 1, H4h; histone cluster 1, H4j; histone cluster 1, H4i; histone cluster 1, H4d; histone cluster 1, H4c; histone cluster 1, H4f; histone cluster 1, H4e; histone cluster 1, H4b; histone cluster 1, H4a; histone cluster 2, H4a; histone cluster 2, H4b | Homo sapiens |
| 8360      | histone cluster 1, H4l; histone cluster 1, H4k; histone cluster 4, H4; histone cluster 1, H4h; histone cluster 1, H4j; histone cluster 1, H4i; histone cluster 1, H4d; histone cluster 1, H4c; histone cluster 1, H4f; histone cluster 1, H4e; histone cluster 1, H4b; histone cluster 1, H4a; histone cluster 2, H4a; histone cluster 2, H4b | Homo sapiens |
| 8370      | histone cluster 1, H4l; histone cluster 1, H4k; histone cluster 4, H4; histone cluster 1, H4h; histone cluster 1, H4j; histone cluster 1, H4i; histone cluster 1, H4d; histone cluster 1, H4c; histone cluster 1, H4f; histone cluster 1, H4e; histone cluster 1, H4b; histone cluster 1, H4a; histone cluster 2, H4a; histone cluster 2, H4b | Homo sapiens |
| 8363      | histone cluster 1, H4l; histone cluster 1, H4k; histone cluster 4, H4; histone cluster 1, H4h; histone cluster 1, H4j; histone cluster 1, H4i; histone cluster 1, H4d; histone cluster 1, H4c; histone cluster 1, H4f; histone cluster 1, H4e; histone cluster 1, H4b; histone cluster 1, H4a; histone cluster 2, H4a; histone cluster 2, H4b | Homo sapiens |
| 8362      | histone cluster 1, H4l; histone cluster 1, H4k; histone cluster 4, H4; histone cluster 1, H4h; histone cluster 1, H4j; histone cluster 1, H4i; histone cluster 1, H4d; histone cluster 1, H4c; histone cluster 1, H4f; histone cluster 1, H4e; histone cluster 1, H4b; histone cluster 1, H4a; histone cluster 2, H4a; histone cluster 2, H4b | Homo sapiens |
| 60        | actin, beta                                                                                                                                                                                                                                                                                                                                   | Homo sapiens |
| 5994      | regulatory factor X-associated protein                                                                                                                                                                                                                                                                                                        | Homo sapiens |
| 10228     | syntaxin 6                                                                                                                                                                                                                                                                                                                                    | Homo sapiens |
| 10066     | secretory carrier membrane protein 2                                                                                                                                                                                                                                                                                                          | Homo sapiens |
| 6635      | small nuclear ribonucleoprotein polypeptide E-like 1; small nuclear ribonucleoprotein polypeptide E; similar to hCG23490                                                                                                                                                                                                                      | Homo sapiens |
| 414153    | small nuclear ribonucleoprotein polypeptide E-like 1; small nuclear ribonucleoprotein polypeptide E; similar to hCG23490                                                                                                                                                                                                                      | Homo sapiens |
| 100130109 | small nuclear ribonucleoprotein polypeptide E-like 1; small nuclear ribonucleoprotein polypeptide E; similar to hCG23490                                                                                                                                                                                                                      | Homo sapiens |
| 7461      | CAP-GLY domain containing linker protein 2                                                                                                                                                                                                                                                                                                    | Homo sapiens |
| 9123      | solute carrier family 16, member 3 (monocarboxylic acid transporter 4)                                                                                                                                                                                                                                                                        | Homo sapiens |
| 6813      | syntaxin binding protein 2                                                                                                                                                                                                                                                                                                                    | Homo sapiens |
| 23240     | KIAA0922                                                                                                                                                                                                                                                                                                                                      | Homo sapiens |
| 23644     | enhancer of mRNA decapping 4                                                                                                                                                                                                                                                                                                                  | Homo sapiens |
| 54928     | inositol monophosphatase domain containing 1                                                                                                                                                                                                                                                                                                  | Homo sapiens |
| 80243     | phosphatidylinositol-3,4,5-trisphosphate-dependent Rac exchange factor 2                                                                                                                                                                                                                                                                      | Homo sapiens |
| 4810      | Nance-Horan syndrome (congenital cataracts and dental anomalies)                                                                                                                                                                                                                                                                              | Homo sapiens |
| 3572      | interleukin 6 signal transducer (gp130, oncostatin M receptor)                                                                                                                                                                                                                                                                                | Homo sapiens |
| 115650    | tumor necrosis factor receptor superfamily, member 13C                                                                                                                                                                                                                                                                                        | Homo sapiens |
| 152559    | progesterone and adiponectin receptor family member III                                                                                                                                                                                                                                                                                       | Homo sapiens |
| 9283      | G protein-coupled receptor 37 like 1                                                                                                                                                                                                                                                                                                          | Homo sapiens |
| 6041      | ribonuclease L (2',5'-oligoadenylate synthetase-dependent)                                                                                                                                                                                                                                                                                    | Homo sapiens |
| 27185     | disrupted in schizophrenia 1                                                                                                                                                                                                                                                                                                                  | Homo sapiens |
| 3232      | homeobox D3                                                                                                                                                                                                                                                                                                                                   | Homo sapiens |
| 5423      | polymerase (DNA directed), beta                                                                                                                                                                                                                                                                                                               | Homo sapiens |
| 7358      | UDP-glucose dehydrogenase                                                                                                                                                                                                                                                                                                                     | Homo sapiens |
| 10982     | microtubule-associated protein, RP/EB family, member 2                                                                                                                                                                                                                                                                                        | Homo sapiens |
| 653437    | aquaporin 12B                                                                                                                                                                                                                                                                                                                                 | Homo sapiens |
| 23593     | heme binding protein 2                                                                                                                                                                                                                                                                                                                        | Homo sapiens |
| 84937     | zinc and ring finger 1                                                                                                                                                                                                                                                                                                                        | Homo sapiens |
| 4163      | mutated in colorectal cancers                                                                                                                                                                                                                                                                                                                 | Homo sapiens |
| 22926     | activating transcription factor 6                                                                                                                                                                                                                                                                                                             | Homo sapiens |
| 80816     | additional sex combs like 3 (Drosophila)                                                                                                                                                                                                                                                                                                      | Homo sapiens |
| 8880      | far upstream element (FUSE) binding protein 1                                                                                                                                                                                                                                                                                                 | Homo sapiens |

|           |                                                                                                                                                                                                                                                                 |              |
|-----------|-----------------------------------------------------------------------------------------------------------------------------------------------------------------------------------------------------------------------------------------------------------------|--------------|
| 55679     | LIM and senescent cell antigen-like domains 2                                                                                                                                                                                                                   | Homo sapiens |
| 27346     | transmembrane protein 97                                                                                                                                                                                                                                        | Homo sapiens |
| 80975     | transmembrane protease, serine 5                                                                                                                                                                                                                                | Homo sapiens |
| 89848     | FCH and double SH3 domains 1                                                                                                                                                                                                                                    | Homo sapiens |
| 9656      | mediator of DNA-damage checkpoint 1                                                                                                                                                                                                                             | Homo sapiens |
| 5694      | proteasome (prosome, macropain) subunit, beta type, 6                                                                                                                                                                                                           | Homo sapiens |
| 8560      | degenerative spermatocyte homolog 1, lipid desaturase (Drosophila)                                                                                                                                                                                              | Homo sapiens |
| 27152     | inturned planar cell polarity effector homolog (Drosophila)                                                                                                                                                                                                     | Homo sapiens |
| 3030      | hydroxyacyl-Coenzyme A dehydrogenase/3-ketoacyl-Coenzyme A thiolase/enoyl-Coenzyme A hydratase (trifunctional protein), alpha subunit                                                                                                                           | Homo sapiens |
| 23135     | lysine (K)-specific demethylase 6B                                                                                                                                                                                                                              | Homo sapiens |
| 8343      | histone cluster 1, H2bi; histone cluster 1, H2bg; histone cluster 1, H2be; histone cluster 1, H2bf; histone cluster 1, H2bc                                                                                                                                     | Homo sapiens |
| 8344      | histone cluster 1, H2bi; histone cluster 1, H2bg; histone cluster 1, H2be; histone cluster 1, H2bf; histone cluster 1, H2bc                                                                                                                                     | Homo sapiens |
| 8347      | histone cluster 1, H2bi; histone cluster 1, H2bg; histone cluster 1, H2be; histone cluster 1, H2bf; histone cluster 1, H2bc                                                                                                                                     | Homo sapiens |
| 8339      | histone cluster 1, H2bi; histone cluster 1, H2bg; histone cluster 1, H2be; histone cluster 1, H2bf; histone cluster 1, H2bc                                                                                                                                     | Homo sapiens |
| 8346      | histone cluster 1, H2bi; histone cluster 1, H2bg; histone cluster 1, H2be; histone cluster 1, H2bf; histone cluster 1, H2bc                                                                                                                                     | Homo sapiens |
| 29126     | CD274 molecule                                                                                                                                                                                                                                                  | Homo sapiens |
| 79002     | chromosome 19 open reading frame 43                                                                                                                                                                                                                             | Homo sapiens |
| 55727     | BTB (POZ) domain containing 7                                                                                                                                                                                                                                   | Homo sapiens |
| 55037     | Pentatricopeptide repeat domain 3                                                                                                                                                                                                                               | Homo sapiens |
| 10238     | WD repeat domain 68                                                                                                                                                                                                                                             | Homo sapiens |
| 8751      | ADAM metallopeptidase domain 15                                                                                                                                                                                                                                 | Homo sapiens |
| 284309    | zinc finger protein 776                                                                                                                                                                                                                                         | Homo sapiens |
| 2005      | ELK4, ETS-domain protein (SRF accessory protein 1)                                                                                                                                                                                                              | Homo sapiens |
| 3727      | jun D proto-oncogene                                                                                                                                                                                                                                            | Homo sapiens |
| 401124    | FLJ16686 protein                                                                                                                                                                                                                                                | Homo sapiens |
| 7767      | zinc finger protein 224                                                                                                                                                                                                                                         | Homo sapiens |
| 59340     | histamine receptor H4                                                                                                                                                                                                                                           | Homo sapiens |
| 100131572 | ribosomal protein S27 pseudogene 29; ribosomal protein S27 pseudogene 9; ribosomal protein S27 pseudogene 23; ribosomal protein S27 pseudogene 13; ribosomal protein S27 pseudogene 7; ribosomal protein S27 pseudogene 6;                                      | Homo sapiens |
| 100131787 | ribosomal protein S27 pseudogene 19; ribosomal protein S27 pseudogene 29; ribosomal protein S27 pseudogene 9; ribosomal protein S27 pseudogene 23; ribosomal protein S27 pseudogene 13; ribosomal protein S27 pseudogene 7; ribosomal protein S27 pseudogene 6; | Homo sapiens |
| 100129905 | ribosomal protein S27 pseudogene 19; ribosomal protein S27 pseudogene 29; ribosomal protein S27 pseudogene 9; ribosomal protein S27 pseudogene 23; ribosomal protein S27 pseudogene 13; ribosomal protein S27 pseudogene 7; ribosomal protein S27 pseudogene 6; | Homo sapiens |
| 100132291 | ribosomal protein S27 pseudogene 19; ribosomal protein S27 pseudogene 29; ribosomal protein S27 pseudogene 9; ribosomal protein S27 pseudogene 23; ribosomal protein S27 pseudogene 13; ribosomal protein S27 pseudogene 7; ribosomal protein S27 pseudogene 6; | Homo sapiens |
| 100130070 | ribosomal protein S27 pseudogene 19; ribosomal protein S27 pseudogene 29; ribosomal protein S27 pseudogene 9; ribosomal protein S27 pseudogene 23; ribosomal protein S27 pseudogene 13; ribosomal protein S27 pseudogene 7; ribosomal protein S27 pseudogene 6; | Homo sapiens |
| 100130775 | ribosomal protein S27 pseudogene 19; ribosomal protein S27 pseudogene 29; ribosomal protein S27 pseudogene 9; ribosomal protein S27 pseudogene 23; ribosomal protein S27 pseudogene 13; ribosomal protein S27 pseudogene 7; ribosomal protein S27 pseudogene 6; | Homo sapiens |
| 100131905 | ribosomal protein S27 pseudogene 19; ribosomal protein S27 pseudogene 29; ribosomal protein S27 pseudogene 9; ribosomal protein S27 pseudogene 23; ribosomal protein S27 pseudogene 13; ribosomal protein S27 pseudogene 7; ribosomal protein S27 pseudogene 6; | Homo sapiens |
| 100132488 | ribosomal protein S27 pseudogene 19; ribosomal protein S27 pseudogene 29; ribosomal protein S27 pseudogene 9; ribosomal protein S27 pseudogene 23; ribosomal protein S27 pseudogene 13; ribosomal protein S27 pseudogene 7; ribosomal protein S27 pseudogene 6; | Homo sapiens |
| 6232      | ribosomal protein S27 pseudogene 19; ribosomal protein S27 pseudogene 29; ribosomal protein S27 pseudogene 9; ribosomal protein S27 pseudogene 23; ribosomal protein S27 pseudogene 13; ribosomal protein S27 pseudogene 7; ribosomal protein S27 pseudogene 6; | Homo sapiens |
| 55662     | hypoxia inducible factor 1, alpha subunit inhibitor                                                                                                                                                                                                             | Homo sapiens |
| 11102     | ribonuclease P/MRP 14kDa subunit                                                                                                                                                                                                                                | Homo sapiens |
| 84929     | fibrinogen C domain containing 1                                                                                                                                                                                                                                | Homo sapiens |
| 10447     | family with sequence similarity 3, member C                                                                                                                                                                                                                     | Homo sapiens |
| 317772    | histone cluster 2, H2ab                                                                                                                                                                                                                                         | Homo sapiens |
| 4604      | myosin binding protein C, slow type                                                                                                                                                                                                                             | Homo sapiens |
| 64149     | chromosome 17 open reading frame 75                                                                                                                                                                                                                             | Homo sapiens |
| 85463     | zinc finger CCCH-type containing 12C                                                                                                                                                                                                                            | Homo sapiens |

|           |                                                                                                                                                                                            |              |
|-----------|--------------------------------------------------------------------------------------------------------------------------------------------------------------------------------------------|--------------|
| 731035    | IQ motif and Sec7 domain 3; similar to IQ motif and Sec7 domain-containing protein 3; similar to IQ motif and SEC7 domain-containing protein 3; similar to IQ motif and Sec7 domain 3      | Homo sapiens |
| 100134209 | IQ motif and Sec7 domain 3; similar to IQ motif and Sec7 domain-containing protein 3; similar to IQ motif and SEC7 domain-containing protein 3; similar to IQ motif and Sec7 domain 3      | Homo sapiens |
| 440073    | IQ motif and Sec7 domain 3; similar to IQ motif and Sec7 domain-containing protein 3; similar to IQ motif and SEC7 domain-containing protein 3; similar to IQ motif and Sec7 domain 3      | Homo sapiens |
| 728056    | IQ motif and Sec7 domain 3; similar to IQ motif and Sec7 domain-containing protein 3; similar to IQ motif and SEC7 domain-containing protein 3; similar to IQ motif and Sec7 domain 3      | Homo sapiens |
| 28985     | malignant T cell amplified sequence 1                                                                                                                                                      | Homo sapiens |
| 10531     | pitrilysin metalloproteinase 1                                                                                                                                                             | Homo sapiens |
| 1398      | v-crk sarcoma virus CT10 oncogene homolog (avian)                                                                                                                                          | Homo sapiens |
| 79627     | opioid growth factor receptor-like 1                                                                                                                                                       | Homo sapiens |
| 506       | ATP synthase, H <sup>+</sup> transporting, mitochondrial F1 complex, beta polypeptide                                                                                                      | Homo sapiens |
| 4860      | nucleoside phosphorylase                                                                                                                                                                   | Homo sapiens |
| 342945    | zinc finger and SCAN domain containing 22                                                                                                                                                  | Homo sapiens |
| 4924      | nucleobindin 1                                                                                                                                                                             | Homo sapiens |
| 53838     | chromosome 11 open reading frame 24                                                                                                                                                        | Homo sapiens |
| 54887     | UHRF1 binding protein 1                                                                                                                                                                    | Homo sapiens |
| 3181      | heterogeneous nuclear ribonucleoprotein A2/B1                                                                                                                                              | Homo sapiens |
| 80221     | acyl-CoA synthetase family member 2                                                                                                                                                        | Homo sapiens |
| 55322     | chromosome 5 open reading frame 22                                                                                                                                                         | Homo sapiens |
| 1652      | D-dopachrome tautomerase                                                                                                                                                                   | Homo sapiens |
| 100132425 | hypothetical protein LOC100132425; similar to small nuclear ribonucleoprotein polypeptide G; small nuclear ribonucleoprotein polypeptide G; small nuclear ribonucleoprotein G-like protein | Homo sapiens |
| 100130003 | hypothetical protein LOC100132425; similar to small nuclear ribonucleoprotein polypeptide G; small nuclear ribonucleoprotein polypeptide G; small nuclear ribonucleoprotein G-like protein | Homo sapiens |
| 6637      | hypothetical protein LOC100132425; similar to small nuclear ribonucleoprotein polypeptide G; small nuclear ribonucleoprotein polypeptide G; small nuclear ribonucleoprotein G-like protein | Homo sapiens |
| 100130932 | hypothetical protein LOC100132425; similar to small nuclear ribonucleoprotein polypeptide G; small nuclear ribonucleoprotein polypeptide G; small nuclear ribonucleoprotein G-like protein | Homo sapiens |
| 100130289 | hypothetical protein LOC100132425; similar to small nuclear ribonucleoprotein polypeptide G; small nuclear ribonucleoprotein polypeptide G; small nuclear ribonucleoprotein G-like protein | Homo sapiens |
| 27314     | RAB30, member RAS oncogene family                                                                                                                                                          | Homo sapiens |
| 2799      | glucosamine (N-acetyl)-6-sulfatase                                                                                                                                                         | Homo sapiens |
| 29095     | ORM1-like 2 (S. cerevisiae)                                                                                                                                                                | Homo sapiens |
| 27238     | G patch domain and KOW motifs                                                                                                                                                              | Homo sapiens |
| 79791     | F-box protein 31                                                                                                                                                                           | Homo sapiens |
| 8945      | beta-transducin repeat containing                                                                                                                                                          | Homo sapiens |
| 64089     | sorting nexin 16                                                                                                                                                                           | Homo sapiens |
| 6262      | ryanodine receptor 2 (cardiac)                                                                                                                                                             | Homo sapiens |
| 10137     | RNA binding motif protein 12; copine I                                                                                                                                                     | Homo sapiens |
| 8904      | RNA binding motif protein 12; copine I                                                                                                                                                     | Homo sapiens |
| 6949      | Treacher Collins-Franceschetti syndrome 1                                                                                                                                                  | Homo sapiens |
| 147179    | WAS/WASL interacting protein family, member 2                                                                                                                                              | Homo sapiens |
| 84289     | inhibitor of growth family, member 5                                                                                                                                                       | Homo sapiens |
| 201163    | folliculin                                                                                                                                                                                 | Homo sapiens |
| 10899     | jumping translocation breakpoint                                                                                                                                                           | Homo sapiens |
| 219972    | macrophage expressed 1                                                                                                                                                                     | Homo sapiens |
| 4076      | cell cycle associated protein 1                                                                                                                                                            | Homo sapiens |
| 64843     | ISL LIM homeobox 2                                                                                                                                                                         | Homo sapiens |
| 10009     | zinc finger and BTB domain containing 33                                                                                                                                                   | Homo sapiens |
| 5287      | phosphoinositide-3-kinase, class 2, beta polypeptide                                                                                                                                       | Homo sapiens |
| 4666      | nascent polypeptide-associated complex alpha subunit                                                                                                                                       | Homo sapiens |
| 10211     | flotillin 1                                                                                                                                                                                | Homo sapiens |
| 170082    | transcription elongation factor A (SII) N-terminal and central domain containing                                                                                                           | Homo sapiens |
| 60592     | short coiled-coil protein                                                                                                                                                                  | Homo sapiens |
| 55693     | lysine (K)-specific demethylase 4D                                                                                                                                                         | Homo sapiens |
| 3064      | huntingtin                                                                                                                                                                                 | Homo sapiens |
| 5861      | RAB1A, member RAS oncogene family                                                                                                                                                          | Homo sapiens |
| 7453      | tryptophanyl-tRNA synthetase                                                                                                                                                               | Homo sapiens |
| 121227    | leucine-rich repeats and immunoglobulin-like domains 3                                                                                                                                     | Homo sapiens |
| 2542      | solute carrier family 37 (glucose-6-phosphate transporter), member 4                                                                                                                       | Homo sapiens |
| 317       | apoptotic peptidase activating factor 1                                                                                                                                                    | Homo sapiens |
| 27335     | eukaryotic translation initiation factor 3, subunit K                                                                                                                                      | Homo sapiens |
| 79833     | gem (nuclear organelle) associated protein 6                                                                                                                                               | Homo sapiens |
| 23193     | glucosidase, alpha; neutral AB                                                                                                                                                             | Homo sapiens |
| 9203      | zinc finger, MYM-type 3                                                                                                                                                                    | Homo sapiens |
| 25875     | LETM1 domain containing 1                                                                                                                                                                  | Homo sapiens |
| 9060      | 3'-phosphoadenosine 5'-phosphosulfate synthase 2                                                                                                                                           | Homo sapiens |
| 11123     | RCAN family member 3                                                                                                                                                                       | Homo sapiens |

|           |                                                                                                                                                                                                                                                                                                                    |              |
|-----------|--------------------------------------------------------------------------------------------------------------------------------------------------------------------------------------------------------------------------------------------------------------------------------------------------------------------|--------------|
| 55313     | calcineurin-like phosphoesterase domain containing 1                                                                                                                                                                                                                                                               | Homo sapiens |
| 10498     | coactivator-associated arginine methyltransferase 1                                                                                                                                                                                                                                                                | Homo sapiens |
| 54764     | zinc finger, RAN-binding domain containing 1                                                                                                                                                                                                                                                                       | Homo sapiens |
| 286827    | tripartite motif-containing 59                                                                                                                                                                                                                                                                                     | Homo sapiens |
| 3741      | potassium voltage-gated channel, shaker-related subfamily, member 5                                                                                                                                                                                                                                                | Homo sapiens |
| 9880      | zinc finger and BTB domain containing 39                                                                                                                                                                                                                                                                           | Homo sapiens |
| 374872    | chromosome 19 open reading frame 35                                                                                                                                                                                                                                                                                | Homo sapiens |
| 132671    | spermatogenesis associated 18 homolog (rat)                                                                                                                                                                                                                                                                        | Homo sapiens |
| 4761      | neurogenic differentiation 2                                                                                                                                                                                                                                                                                       | Homo sapiens |
| 9862      | mediator complex subunit 24                                                                                                                                                                                                                                                                                        | Homo sapiens |
| 58499     | zinc finger protein 462                                                                                                                                                                                                                                                                                            | Homo sapiens |
| 463       | zinc finger homeobox 3; hypothetical LOC100132068                                                                                                                                                                                                                                                                  | Homo sapiens |
| 100132068 | zinc finger homeobox 3; hypothetical LOC100132068                                                                                                                                                                                                                                                                  | Homo sapiens |
| 51109     | retinol dehydrogenase 11 (all-trans/9-cis/11-cis)                                                                                                                                                                                                                                                                  | Homo sapiens |
| 64866     | CUB domain containing protein 1                                                                                                                                                                                                                                                                                    | Homo sapiens |
| 6187      | ribosomal protein S2 pseudogene 8; ribosomal protein S2 pseudogene 11; ribosomal protein S2 pseudogene 5; ribosomal protein S2 pseudogene 12; ribosomal protein S2 pseudogene 51; ribosomal protein S2 pseudogene 17; ribosomal protein S2 pseudogene 55; ribosomal protein S2 pseudogene 20; ribosomal protein S2 | Homo sapiens |
| 286444    | ribosomal protein S2 pseudogene 8; ribosomal protein S2 pseudogene 11; ribosomal protein S2 pseudogene 5; ribosomal protein S2 pseudogene 12; ribosomal protein S2 pseudogene 51; ribosomal protein S2 pseudogene 17; ribosomal protein S2 pseudogene 55; ribosomal protein S2 pseudogene 20; ribosomal protein S2 | Homo sapiens |
| 100130562 | ribosomal protein S2 pseudogene 8; ribosomal protein S2 pseudogene 11; ribosomal protein S2 pseudogene 5; ribosomal protein S2 pseudogene 12; ribosomal protein S2 pseudogene 51; ribosomal protein S2 pseudogene 17; ribosomal protein S2 pseudogene 55; ribosomal protein S2 pseudogene 20; ribosomal protein S2 | Homo sapiens |
| 650901    | ribosomal protein S2 pseudogene 8; ribosomal protein S2 pseudogene 11; ribosomal protein S2 pseudogene 5; ribosomal protein S2 pseudogene 12; ribosomal protein S2 pseudogene 51; ribosomal protein S2 pseudogene 17; ribosomal protein S2 pseudogene 55; ribosomal protein S2 pseudogene 20; ribosomal protein S2 | Homo sapiens |
| 343184    | ribosomal protein S2 pseudogene 8; ribosomal protein S2 pseudogene 11; ribosomal protein S2 pseudogene 5; ribosomal protein S2 pseudogene 12; ribosomal protein S2 pseudogene 51; ribosomal protein S2 pseudogene 17; ribosomal protein S2 pseudogene 55; ribosomal protein S2 pseudogene 20; ribosomal protein S2 | Homo sapiens |
| 440589    | ribosomal protein S2 pseudogene 8; ribosomal protein S2 pseudogene 11; ribosomal protein S2 pseudogene 5; ribosomal protein S2 pseudogene 12; ribosomal protein S2 pseudogene 51; ribosomal protein S2 pseudogene 17; ribosomal protein S2 pseudogene 55; ribosomal protein S2 pseudogene 20; ribosomal protein S2 | Homo sapiens |
| 400963    | ribosomal protein S2 pseudogene 8; ribosomal protein S2 pseudogene 11; ribosomal protein S2 pseudogene 5; ribosomal protein S2 pseudogene 12; ribosomal protein S2 pseudogene 51; ribosomal protein S2 pseudogene 17; ribosomal protein S2 pseudogene 55; ribosomal protein S2 pseudogene 20; ribosomal protein S2 | Homo sapiens |
| 729679    | ribosomal protein S2 pseudogene 8; ribosomal protein S2 pseudogene 11; ribosomal protein S2 pseudogene 5; ribosomal protein S2 pseudogene 12; ribosomal protein S2 pseudogene 51; ribosomal protein S2 pseudogene 17; ribosomal protein S2 pseudogene 55; ribosomal protein S2 pseudogene 20; ribosomal protein S2 | Homo sapiens |
| 645018    | ribosomal protein S2 pseudogene 8; ribosomal protein S2 pseudogene 11; ribosomal protein S2 pseudogene 5; ribosomal protein S2 pseudogene 12; ribosomal protein S2 pseudogene 51; ribosomal protein S2 pseudogene 17; ribosomal protein S2 pseudogene 55; ribosomal protein S2 pseudogene 20; ribosomal protein S2 | Homo sapiens |
| 19        | ATP-binding cassette, sub-family A (ABC1), member 1                                                                                                                                                                                                                                                                | Homo sapiens |
| 390       | Rho family GTPase 3                                                                                                                                                                                                                                                                                                | Homo sapiens |
| 5295      | phosphoinositide-3-kinase, regulatory subunit 1 (alpha)                                                                                                                                                                                                                                                            | Homo sapiens |
| 201514    | zinc finger protein 584                                                                                                                                                                                                                                                                                            | Homo sapiens |
| 23        | ATP-binding cassette, sub-family F (GCN20), member 1                                                                                                                                                                                                                                                               | Homo sapiens |
| 81796     | solute carrier organic anion transporter family, member 5A1                                                                                                                                                                                                                                                        | Homo sapiens |
| 5921      | RAS p21 protein activator (GTPase activating protein) 1                                                                                                                                                                                                                                                            | Homo sapiens |
| 27252     | kelch-like 20 (Drosophila)                                                                                                                                                                                                                                                                                         | Homo sapiens |
| 22806     | IKAROS family zinc finger 3 (Aiolos)                                                                                                                                                                                                                                                                               | Homo sapiens |
| 8907      | adaptor-related protein complex 1, mu 1 subunit                                                                                                                                                                                                                                                                    | Homo sapiens |
| 11019     | lipoic acid synthetase                                                                                                                                                                                                                                                                                             | Homo sapiens |
| 22879     | MON1 homolog B (yeast)                                                                                                                                                                                                                                                                                             | Homo sapiens |
| 256051    | zinc finger protein 549                                                                                                                                                                                                                                                                                            | Homo sapiens |
| 126231    | zinc finger protein 573                                                                                                                                                                                                                                                                                            | Homo sapiens |
| 11133     | kaptin (actin binding protein)                                                                                                                                                                                                                                                                                     | Homo sapiens |
| 158471    | prune homolog 2 (Drosophila)                                                                                                                                                                                                                                                                                       | Homo sapiens |
| 3688      | integrin, beta 1 (fibronectin receptor, beta polypeptide, antigen CD29 includes MDF2, MSK12)                                                                                                                                                                                                                       | Homo sapiens |
| 643904    | ring finger protein 222                                                                                                                                                                                                                                                                                            | Homo sapiens |
| 8578      | scavenger receptor class F, member 1                                                                                                                                                                                                                                                                               | Homo sapiens |
| 51008     | activating signal cointegrator 1 complex subunit 1                                                                                                                                                                                                                                                                 | Homo sapiens |
| 22875     | ectonucleotide pyrophosphatase/phosphodiesterase 4 (putative function)                                                                                                                                                                                                                                             | Homo sapiens |
| 388112    | Nanog homeobox pseudogene 8; Nanog homeobox                                                                                                                                                                                                                                                                        | Homo sapiens |
| 79923     | Nanog homeobox pseudogene 8; Nanog homeobox                                                                                                                                                                                                                                                                        | Homo sapiens |
| 3148      | high-mobility group box 2                                                                                                                                                                                                                                                                                          | Homo sapiens |
| 2132      | exostoses (multiple) 2                                                                                                                                                                                                                                                                                             | Homo sapiens |
| 10130     | protein disulfide isomerase family A, member 6                                                                                                                                                                                                                                                                     | Homo sapiens |
| 1173      | adaptor-related protein complex 2, mu 1 subunit                                                                                                                                                                                                                                                                    | Homo sapiens |

|        |                                                                                                                                 |              |
|--------|---------------------------------------------------------------------------------------------------------------------------------|--------------|
| 1456   | casein kinase 1, gamma 3                                                                                                        | Homo sapiens |
| 6158   | ribosomal protein L28                                                                                                           | Homo sapiens |
| 4134   | microtubule-associated protein 4                                                                                                | Homo sapiens |
| 51361  | hook homolog 1 (Drosophila)                                                                                                     | Homo sapiens |
| 150275 | coiled-coil domain containing 117                                                                                               | Homo sapiens |
| 6872   | TAF1 RNA polymerase II, TATA box binding protein (TBP)-associated factor, 250kDa                                                | Homo sapiens |
| 4179   | CD46 molecule, complement regulatory protein                                                                                    | Homo sapiens |
| 7158   | tumor protein p53 binding protein 1                                                                                             | Homo sapiens |
| 10818  | fibroblast growth factor receptor substrate 2                                                                                   | Homo sapiens |
| 2067   | excision repair cross-complementing rodent repair deficiency, complementation group 1 (includes overlapping antisense sequence) | Homo sapiens |
| 138639 | protein tyrosine phosphatase domain containing 1                                                                                | Homo sapiens |
| 163590 | torsin A interacting protein 2                                                                                                  | Homo sapiens |
| 151887 | coiled-coil domain containing 80                                                                                                | Homo sapiens |
| 54742  | lymphocyte antigen 6 complex, locus K                                                                                           | Homo sapiens |
| 10495  | ecto-NOX disulfide-thiol exchanger 2                                                                                            | Homo sapiens |
| 65250  | chromosome 5 open reading frame 42                                                                                              | Homo sapiens |
| 57621  | zinc finger and BTB domain containing 2                                                                                         | Homo sapiens |
| 4350   | N-methylpurine-DNA glycosylase                                                                                                  | Homo sapiens |
| 57493  | HEG homolog 1 (zebrafish)                                                                                                       | Homo sapiens |
| 116143 | WD repeat domain 92                                                                                                             | Homo sapiens |
| 54629  | family with sequence similarity 63, member B                                                                                    | Homo sapiens |
| 54958  | transmembrane protein 160                                                                                                       | Homo sapiens |
| 29103  | DnaJ (Hsp40) homolog, subfamily C, member 15                                                                                    | Homo sapiens |
| 541578 | chromosome X open reading frame 40A; chromosome X open reading frame 40B                                                        | Homo sapiens |
| 91966  | chromosome X open reading frame 40A; chromosome X open reading frame 40B                                                        | Homo sapiens |
| 8140   | solute carrier family 7 (cationic amino acid transporter, y+ system), member 5                                                  | Homo sapiens |
| 388759 | chromosome 1 open reading frame 229                                                                                             | Homo sapiens |
| 144455 | E2F transcription factor 7                                                                                                      | Homo sapiens |
| 25937  | WW domain containing transcription regulator 1                                                                                  | Homo sapiens |
| 10169  | chromosome 15 open reading frame 63; small EDRK-rich factor 2                                                                   | Homo sapiens |
| 25764  | chromosome 15 open reading frame 63; small EDRK-rich factor 2                                                                   | Homo sapiens |
| 134553 | chromosome 5 open reading frame 24                                                                                              | Homo sapiens |
| 7109   | trafficking protein particle complex 10                                                                                         | Homo sapiens |
| 60468  | BTB and CNC homology 1, basic leucine zipper transcription factor 2                                                             | Homo sapiens |
| 9421   | heart and neural crest derivatives expressed 1                                                                                  | Homo sapiens |
| 57148  | KIAA1219                                                                                                                        | Homo sapiens |
| 653375 | RCC1-like G exchanging factor-like; Williams-Beuren syndrome chromosome region 16                                               | Homo sapiens |
| 81554  | RCC1-like G exchanging factor-like; Williams-Beuren syndrome chromosome region 16                                               | Homo sapiens |
| 136051 | zinc finger protein 786                                                                                                         | Homo sapiens |
| 23635  | single-stranded DNA binding protein 2                                                                                           | Homo sapiens |
| 26259  | F-box and WD repeat domain containing 8                                                                                         | Homo sapiens |
| 55907  | cytidine monophosphate N-acetylneuraminic acid synthetase                                                                       | Homo sapiens |
| 2079   | enhancer of rudimentary homolog (Drosophila)                                                                                    | Homo sapiens |
| 148534 | transmembrane protein 56                                                                                                        | Homo sapiens |
| 79012  | CaM kinase-like vesicle-associated                                                                                              | Homo sapiens |
| 81876  | RAB1B, member RAS oncogene family                                                                                               | Homo sapiens |
| 9818   | nucleoporin like 1                                                                                                              | Homo sapiens |
| 5635   | phosphoribosyl pyrophosphate synthetase-associated protein 1                                                                    | Homo sapiens |
| 26037  | signal-induced proliferation-associated 1 like 1                                                                                | Homo sapiens |
| 3824   | killer cell lectin-like receptor subfamily D, member 1                                                                          | Homo sapiens |
| 81544  | glycerophosphodiester phosphodiesterase domain containing 5                                                                     | Homo sapiens |
| 1432   | mitogen-activated protein kinase 14                                                                                             | Homo sapiens |
| 390916 | nudix (nucleoside diphosphate linked moiety X)-type motif 19                                                                    | Homo sapiens |
| 23743  | betaine-homocysteine methyltransferase 2                                                                                        | Homo sapiens |
| 497661 | chromosome 18 open reading frame 32                                                                                             | Homo sapiens |
| 950    | scavenger receptor class B, member 2                                                                                            | Homo sapiens |
| 55954  | zinc finger, matrin type 5                                                                                                      | Homo sapiens |
| 81889  | fumarylacetoacetate hydrolase domain containing 1                                                                               | Homo sapiens |
| 57142  | reticulon 4                                                                                                                     | Homo sapiens |
| 10277  | ubiquitination factor E4B (UFD2 homolog, yeast)                                                                                 | Homo sapiens |
| 1723   | dihydroorotate dehydrogenase                                                                                                    | Homo sapiens |
| 9348   | N-deacetylase/N-sulfotransferase (heparan glucosaminyl) 3                                                                       | Homo sapiens |
| 387914 | shisa homolog 2 (Xenopus laevis)                                                                                                | Homo sapiens |
| 64792  | RAB, member RAS oncogene family-like 5                                                                                          | Homo sapiens |
| 57456  | KIAA1143                                                                                                                        | Homo sapiens |
| 2972   | BRF1 homolog, subunit of RNA polymerase III transcription initiation factor IIIB (S. cerevisiae)                                | Homo sapiens |
| 26273  | F-box protein 3                                                                                                                 | Homo sapiens |
| 8303   | stannin                                                                                                                         | Homo sapiens |
| 2176   | Fanconi anemia, complementation group C                                                                                         | Homo sapiens |
| 217    | aldehyde dehydrogenase 2 family (mitochondrial)                                                                                 | Homo sapiens |
| 58513  | epidermal growth factor receptor pathway substrate 15-like 1                                                                    | Homo sapiens |
| 5116   | pericentrin                                                                                                                     | Homo sapiens |
| 220074 | leucine rich transmembrane and O-methyltransferase domain containing                                                            | Homo sapiens |
| 80143  | suppressor of IKK epsilon                                                                                                       | Homo sapiens |
| 55027  | HEAT repeat containing 3                                                                                                        | Homo sapiens |
| 9354   | ubiquitination factor E4A (UFD2 homolog, yeast)                                                                                 | Homo sapiens |
| 1305   | collagen, type XIII, alpha 1                                                                                                    | Homo sapiens |

|        |                                                                                                        |              |
|--------|--------------------------------------------------------------------------------------------------------|--------------|
| 9522   | secretory carrier membrane protein 1                                                                   | Homo sapiens |
| 114134 | solute carrier family 2 (facilitated glucose transporter), member 13                                   | Homo sapiens |
| 2063   | nuclear receptor subfamily 2, group F, member 6                                                        | Homo sapiens |
| 7779   | solute carrier family 30 (zinc transporter), member 1                                                  | Homo sapiens |
| 9044   | BTAFl RNA polymerase II, B-TFIID transcription factor-associated, 170kDa (Mot1 homolog, S. cerevisiae) | Homo sapiens |
| 4799   | nuclear transcription factor, X-box binding 1                                                          | Homo sapiens |
| 723790 | histone cluster 2, H2aa3; histone cluster 2, H2aa4                                                     | Homo sapiens |
| 8337   | histone cluster 2, H2aa3; histone cluster 2, H2aa4                                                     | Homo sapiens |
| 10072  | dipeptidyl-peptidase 3                                                                                 | Homo sapiens |
| 10948  | StAR-related lipid transfer (START) domain containing 3                                                | Homo sapiens |
| 3218   | homeobox B8                                                                                            | Homo sapiens |
| 10481  | homeobox B13                                                                                           | Homo sapiens |
| 7110   | TATA element modulatory factor 1                                                                       | Homo sapiens |
| 5654   | HtrA serine peptidase 1                                                                                | Homo sapiens |
| 5106   | phosphoenolpyruvate carboxykinase 2 (mitochondrial)                                                    | Homo sapiens |
| 5603   | mitogen-activated protein kinase 13                                                                    | Homo sapiens |
| 7879   | RAB7A, member RAS oncogene family                                                                      | Homo sapiens |
| 8533   | COP9 constitutive photomorphogenic homolog subunit 3 (Arabidopsis)                                     | Homo sapiens |
| 6303   | spermidine/spermine N1-acetyltransferase 1                                                             | Homo sapiens |
| 116224 | family with sequence similarity 122A                                                                   | Homo sapiens |
| 168451 | THAP domain containing 5                                                                               | Homo sapiens |
| 23551  | RASD family, member 2                                                                                  | Homo sapiens |
| 9775   | eukaryotic translation initiation factor 4A, isoform 3                                                 | Homo sapiens |
| 54876  | chromosome 4 open reading frame 30                                                                     | Homo sapiens |
| 90007  | midnolin                                                                                               | Homo sapiens |
| 83999  | kringle containing transmembrane protein 1                                                             | Homo sapiens |
| 7350   | uncoupling protein 1 (mitochondrial, proton carrier)                                                   | Homo sapiens |
| 125150 | zinc finger, SWIM-type containing 7                                                                    | Homo sapiens |
| 3508   | immunoglobulin mu binding protein 2                                                                    | Homo sapiens |
| 23011  | RAB21, member RAS oncogene family                                                                      | Homo sapiens |
| 9538   | etoposide induced 2.4 mRNA                                                                             | Homo sapiens |
| 83596  | BCL2-like 12 (proline rich)                                                                            | Homo sapiens |
| 6945   | MAX-like protein X                                                                                     | Homo sapiens |
| 2022   | endoglin                                                                                               | Homo sapiens |
| 10087  | collagen, type IV, alpha 3 (Goodpasture antigen) binding protein                                       | Homo sapiens |
| 10766  | transducer of ERBB2, 2                                                                                 | Homo sapiens |
| 55222  | leucine rich repeat containing 20                                                                      | Homo sapiens |
| 127544 | ring finger protein 19B                                                                                | Homo sapiens |
| 9113   | LATS, large tumor suppressor, homolog 1 (Drosophila)                                                   | Homo sapiens |
| 157506 | retinol dehydrogenase 10 (all-trans)                                                                   | Homo sapiens |
| 51162  | EGF-like-domain, multiple 7                                                                            | Homo sapiens |
| 115106 | HAUS augmin-like complex, subunit 1                                                                    | Homo sapiens |
| 353500 | bone morphogenetic protein 8a                                                                          | Homo sapiens |
| 6047   | ring finger protein 4; hypothetical LOC644006                                                          | Homo sapiens |
| 644006 | ring finger protein 4; hypothetical LOC644006                                                          | Homo sapiens |
| 2814   | glycoprotein V (platelet)                                                                              | Homo sapiens |
| 5255   | phosphorylase kinase, alpha 1 pseudogene 1; phosphorylase kinase, alpha 1 (muscle)                     | Homo sapiens |
| 646780 | phosphorylase kinase, alpha 1 pseudogene 1; phosphorylase kinase, alpha 1 (muscle)                     | Homo sapiens |
| 9266   | cytohesin 2                                                                                            | Homo sapiens |
| 85403  | ELL associated factor 1                                                                                | Homo sapiens |
| 84503  | zinc finger protein 527                                                                                | Homo sapiens |
| 4299   | AF4/FMR2 family, member 1                                                                              | Homo sapiens |
| 2110   | electron-transferring-flavoprotein dehydrogenase                                                       | Homo sapiens |
| 6648   | superoxide dismutase 2, mitochondrial                                                                  | Homo sapiens |
| 55654  | transmembrane protein 127                                                                              | Homo sapiens |
| 8850   | K(lysine) acetyltransferase 2B                                                                         | Homo sapiens |
| 23310  | non-SMC condensin II complex, subunit D3                                                               | Homo sapiens |
| 79718  | transducin (beta)-like 1 X-linked receptor 1                                                           | Homo sapiens |
| 3930   | lamin B receptor                                                                                       | Homo sapiens |
| 8603   | chromosome 4 open reading frame 8                                                                      | Homo sapiens |
| 24137  | kinesin family member 4B; kinesin family member 4A                                                     | Homo sapiens |
| 285643 | kinesin family member 4B; kinesin family member 4A                                                     | Homo sapiens |
| 343035 | retinal degeneration 3                                                                                 | Homo sapiens |
| 23250  | ATPase, class VI, type 11A                                                                             | Homo sapiens |
| 10067  | secretory carrier membrane protein 3                                                                   | Homo sapiens |
| 147372 | collagen and calcium binding EGF domains 1                                                             | Homo sapiens |
| 79991  | oligonucleotide/oligosaccharide-binding fold containing 1                                              | Homo sapiens |
| 8026   | DiGeorge syndrome chromosome region-2                                                                  | Homo sapiens |
| 283933 | zinc finger protein 843                                                                                | Homo sapiens |
| 144501 | keratin 80                                                                                             | Homo sapiens |
| 6434   | transformer 2 beta homolog (Drosophila)                                                                | Homo sapiens |
| 4131   | microtubule-associated protein 1B                                                                      | Homo sapiens |
| 9877   | zinc finger CCCH-type containing 11A                                                                   | Homo sapiens |
| 400569 | mediator complex subunit 11                                                                            | Homo sapiens |
| 11078  | TRIO and F-actin binding protein                                                                       | Homo sapiens |
| 9343   | elongation factor Tu GTP binding domain containing 2                                                   | Homo sapiens |
| 160760 | PTC7 protein phosphatase homolog (S. cerevisiae)                                                       | Homo sapiens |
| 55262  | chromosome 7 open reading frame 43                                                                     | Homo sapiens |



|        |                                                                              |              |
|--------|------------------------------------------------------------------------------|--------------|
| 60625  | DEAH (Asp-Glu-Ala-His) box polypeptide 35                                    | Homo sapiens |
| 389206 | BEN domain containing 4                                                      | Homo sapiens |
| 81688  | chromosome 6 open reading frame 62                                           | Homo sapiens |
| 23307  | FK506 binding protein 15, 133kDa                                             | Homo sapiens |
| 22809  | activating transcription factor 5                                            | Homo sapiens |
| 6515   | solute carrier family 2 (facilitated glucose transporter), member 3          | Homo sapiens |
| 9764   | KIAA0513                                                                     | Homo sapiens |
| 595    | cyclin D1                                                                    | Homo sapiens |
| 23435  | TAR DNA binding protein                                                      | Homo sapiens |
| 80851  | SH3-binding domain protein 5-like                                            | Homo sapiens |
| 90522  | Yipl interacting factor homolog B ( <i>S. cerevisiae</i> )                   | Homo sapiens |
| 6294   | scaffold attachment factor B                                                 | Homo sapiens |
| 63929  | X-prolyl aminopeptidase (aminopeptidase P) 3, putative                       | Homo sapiens |
| 23518  | R3H domain containing 1                                                      | Homo sapiens |
| 1964   | eukaryotic translation initiation factor 1A, X-linked                        | Homo sapiens |
| 7711   | zinc finger protein 155                                                      | Homo sapiens |
| 4117   | male germ cell-associated kinase                                             | Homo sapiens |
| 79027  | zinc finger protein 655                                                      | Homo sapiens |
| 22985  | apoptotic chromatin condensation inducer 1                                   | Homo sapiens |
| 3207   | homeobox A11                                                                 | Homo sapiens |
| 3884   | keratin 33B                                                                  | Homo sapiens |
| 387    | ras homolog gene family, member A                                            | Homo sapiens |
| 160    | adaptor-related protein complex 2, alpha 1 subunit                           | Homo sapiens |
| 84527  | zinc finger protein 559                                                      | Homo sapiens |
| 26151  | N-acetyltransferase 9 (GCN5-related, putative)                               | Homo sapiens |
| 440400 | ribonuclease, RNase K                                                        | Homo sapiens |
| 4841   | non-POU domain containing, octamer-binding                                   | Homo sapiens |
| 80742  | proline rich 3                                                               | Homo sapiens |
| 6737   | tripartite motif-containing 21                                               | Homo sapiens |
| 8879   | sphingosine-1-phosphate lyase 1                                              | Homo sapiens |
| 63931  | mitochondrial ribosomal protein S14                                          | Homo sapiens |
| 5430   | polymerase (RNA) II (DNA directed) polypeptide A, 220kDa                     | Homo sapiens |
| 63906  | G patch domain containing 3                                                  | Homo sapiens |
| 6247   | retinoschisin 1                                                              | Homo sapiens |
| 57468  | solute carrier family 12 (potassium-chloride transporter), member 5          | Homo sapiens |
| 122416 | ankyrin repeat domain 9                                                      | Homo sapiens |
| 2976   | general transcription factor IIIC, polypeptide 2, beta 110kDa                | Homo sapiens |
| 91869  | RFT1 homolog ( <i>S. cerevisiae</i> )                                        | Homo sapiens |
| 2091   | fibrillarlin                                                                 | Homo sapiens |
| 80313  | leucine rich repeat containing 27                                            | Homo sapiens |
| 113146 | AHNAK nucleoprotein 2                                                        | Homo sapiens |
| 64420  | sushi domain containing 1                                                    | Homo sapiens |
| 3460   | interferon gamma receptor 2 (interferon gamma transducer 1)                  | Homo sapiens |
| 23154  | neurochondrin                                                                | Homo sapiens |
| 25946  | zinc finger protein 385A                                                     | Homo sapiens |
| 1385   | cAMP responsive element binding protein 1                                    | Homo sapiens |
| 6168   | ribosomal protein L37a                                                       | Homo sapiens |
| 10489  | leucine rich repeat containing 41                                            | Homo sapiens |
| 27125  | AF4/FMR2 family, member 4                                                    | Homo sapiens |
| 112399 | egl nine homolog 3 ( <i>C. elegans</i> )                                     | Homo sapiens |
| 645191 | leucine rich repeat and Ig domain containing 3                               | Homo sapiens |
| 10725  | nuclear factor of activated T-cells 5, tonicity-responsive                   | Homo sapiens |
| 285193 | dual specificity phosphatase 28                                              | Homo sapiens |
| 5519   | protein phosphatase 2 (formerly 2A), regulatory subunit A, beta isoform      | Homo sapiens |
| 84254  | calcium/calmodulin-dependent protein kinase kinase 1, alpha                  | Homo sapiens |
| 2357   | formyl peptide receptor 1                                                    | Homo sapiens |
| 115273 | RAB42, member RAS oncogene family                                            | Homo sapiens |
| 204    | adenylate kinase 2                                                           | Homo sapiens |
| 124583 | calcium activated nucleotidase 1                                             | Homo sapiens |
| 85416  | Zic family member 5 (odd-paired homolog, <i>Drosophila</i> )                 | Homo sapiens |
| 891    | cyclin B1                                                                    | Homo sapiens |
| 11171  | serine/threonine kinase receptor associated protein                          | Homo sapiens |
| 90411  | multiple coagulation factor deficiency 2                                     | Homo sapiens |
| 89927  | chromosome 16 open reading frame 45                                          | Homo sapiens |
| 25828  | thioredoxin 2                                                                | Homo sapiens |
| 23568  | ADP-ribosylation factor-like 2 binding protein                               | Homo sapiens |
| 8832   | CD84 molecule                                                                | Homo sapiens |
| 91694  | LON peptidase N-terminal domain and ring finger 1                            | Homo sapiens |
| 1373   | carbamoyl-phosphate synthetase 1, mitochondrial                              | Homo sapiens |
| 1027   | cyclin-dependent kinase inhibitor 1B (p27, Kip1)                             | Homo sapiens |
| 10313  | reticulon 3                                                                  | Homo sapiens |
| 60488  | mitochondrial ribosomal protein S35                                          | Homo sapiens |
| 7799   | PR domain containing 2, with ZNF domain                                      | Homo sapiens |
| 7431   | vimentin                                                                     | Homo sapiens |
| 10201  | non-metastatic cells 6, protein expressed in (nucleoside-diphosphate kinase) | Homo sapiens |
| 9439   | mediator complex subunit 23                                                  | Homo sapiens |
| 55238  | solute carrier family 38, member 7                                           | Homo sapiens |
| 23451  | splicing factor 3b, subunit 1, 155kDa                                        | Homo sapiens |
| 8553   | basic helix-loop-helix family, member e40                                    | Homo sapiens |

|        |                                                                                                        |              |
|--------|--------------------------------------------------------------------------------------------------------|--------------|
| 23096  | IQ motif and Sec7 domain 2                                                                             | Homo sapiens |
| 8776   | myotubularin related protein 1                                                                         | Homo sapiens |
| 7812   | cold shock domain containing E1, RNA-binding                                                           | Homo sapiens |
| 8766   | RAB11A, member RAS oncogene family                                                                     | Homo sapiens |
| 84124  | zinc finger protein 394                                                                                | Homo sapiens |
| 22992  | lysine (K)-specific demethylase 2A                                                                     | Homo sapiens |
| 7126   | tumor necrosis factor, alpha-induced protein 1 (endothelial)                                           | Homo sapiens |
| 152404 | immunoglobulin superfamily, member 11                                                                  | Homo sapiens |
| 3024   | histone cluster 1, H1a                                                                                 | Homo sapiens |
| 916    | CD3e molecule, epsilon (CD3-TCR complex)                                                               | Homo sapiens |
| 2275   | four and a half LIM domains 3                                                                          | Homo sapiens |
| 6723   | spermidine synthase                                                                                    | Homo sapiens |
| 9329   | general transcription factor IIIC, polypeptide 4, 90kDa                                                | Homo sapiens |
| 55288  | ras homolog gene family, member T1                                                                     | Homo sapiens |
| 51582  | antizyme inhibitor 1                                                                                   | Homo sapiens |
| 80111  | chromosome 3 open reading frame 36                                                                     | Homo sapiens |
| 2193   | phenylalanyl-tRNA synthetase, alpha subunit                                                            | Homo sapiens |
| 9510   | ADAM metalloproteinase with thrombospondin type 1 motif, 1                                             | Homo sapiens |
| 9644   | SH3 and PX domains 2A                                                                                  | Homo sapiens |
| 128312 | histone cluster 3, H2bb                                                                                | Homo sapiens |
| 348793 | WD repeat domain 53                                                                                    | Homo sapiens |
| 64902  | alanine-glyoxylate aminotransferase 2                                                                  | Homo sapiens |
| 9388   | lipase, endothelial                                                                                    | Homo sapiens |
| 9722   | nitric oxide synthase 1 (neuronal) adaptor protein                                                     | Homo sapiens |
| 7050   | TGFB-induced factor homeobox 1                                                                         | Homo sapiens |
| 9040   | ubiquitin-conjugating enzyme E2M (UBC12 homolog, yeast); ubiquitin-conjugating enzyme E2M pseudogene 1 | Homo sapiens |
| 606551 | ubiquitin-conjugating enzyme E2M (UBC12 homolog, yeast); ubiquitin-conjugating enzyme E2M pseudogene 1 | Homo sapiens |
| 10247  | heat-responsive protein 12                                                                             | Homo sapiens |
| 2000   | E74-like factor 4 (ets domain transcription factor)                                                    | Homo sapiens |
| 4779   | nuclear factor (erythroid-derived 2)-like 1                                                            | Homo sapiens |
| 5724   | platelet-activating factor receptor                                                                    | Homo sapiens |
| 4097   | v-maf musculoaponeurotic fibrosarcoma oncogene homolog G (avian)                                       | Homo sapiens |
| 6876   | transgelin                                                                                             | Homo sapiens |
| 10627  | myosin, light chain 12A, regulatory, non-sarcomeric                                                    | Homo sapiens |
| 4848   | CCR4-NOT transcription complex, subunit 2                                                              | Homo sapiens |
| 1363   | carboxypeptidase E                                                                                     | Homo sapiens |
| 862    | runt-related transcription factor 1; translocated to, 1 (cyclin D-related)                             | Homo sapiens |
| 9375   | transmembrane 9 superfamily member 2                                                                   | Homo sapiens |
| 7094   | talin 1                                                                                                | Homo sapiens |
| 92092  | zinc finger CCCH-type, antiviral 1-like                                                                | Homo sapiens |
| 89858  | sialic acid binding Ig-like lectin 12                                                                  | Homo sapiens |
| 3621   | inhibitor of growth family, member 1                                                                   | Homo sapiens |
| 10810  | WAS protein family, member 3                                                                           | Homo sapiens |
| 64063  | protease, serine, 22                                                                                   | Homo sapiens |
| 6165   | ribosomal protein L35a                                                                                 | Homo sapiens |
| 467    | activating transcription factor 3                                                                      | Homo sapiens |
| 2158   | coagulation factor IX                                                                                  | Homo sapiens |
| 55275  | vacuolar protein sorting 53 homolog (S. cerevisiae)                                                    | Homo sapiens |
| 3570   | interleukin 6 receptor                                                                                 | Homo sapiens |
| 53918  | pelota homolog (Drosophila)                                                                            | Homo sapiens |
| 25880  | transmembrane protein 186                                                                              | Homo sapiens |
| 26054  | SUMO1/sentrin specific peptidase 6                                                                     | Homo sapiens |
| 3257   | Hermansky-Pudlak syndrome 1                                                                            | Homo sapiens |
| 26256  | calcium binding tyrosine-(Y)-phosphorylation regulated                                                 | Homo sapiens |
| 387032 | zinc finger with KRAB and SCAN domains 4                                                               | Homo sapiens |
| 7251   | tumor susceptibility gene 101                                                                          | Homo sapiens |
| 51573  | glycerophosphodiester phosphodiesterase 1                                                              | Homo sapiens |
| 54941  | ring finger protein 125                                                                                | Homo sapiens |
| 114804 | ring finger protein 157                                                                                | Homo sapiens |
| 83759  | RNA binding motif protein 4B                                                                           | Homo sapiens |
| 147657 | zinc finger protein 480                                                                                | Homo sapiens |
| 79001  | vitamin K epoxide reductase complex, subunit 1                                                         | Homo sapiens |
| 23545  | ATPase, H+ transporting, lysosomal V0 subunit a2                                                       | Homo sapiens |
| 9275   | B-cell CLL/lymphoma 7B                                                                                 | Homo sapiens |
| 8856   | nuclear receptor subfamily 1, group I, member 2                                                        | Homo sapiens |
| 6522   | solute carrier family 4, anion exchanger, member 2 (erythrocyte membrane protein band 3-like 1)        | Homo sapiens |
| 11103  | KRR1, small subunit (SSU) processome component, homolog (yeast)                                        | Homo sapiens |
| 60559  | signal peptidase complex subunit 3 homolog (S. cerevisiae)                                             | Homo sapiens |
| 23112  | trinucleotide repeat containing 6B                                                                     | Homo sapiens |
| 23446  | solute carrier family 44, member 1                                                                     | Homo sapiens |
| 1111   | CHK1 checkpoint homolog (S. pombe)                                                                     | Homo sapiens |
| 8467   | SWI/SNF related, matrix associated, actin dependent regulator of chromatin, subfamily a, member 5      | Homo sapiens |
| 648791 | protein phosphatase 1, regulatory (inhibitor) subunit 3G                                               | Homo sapiens |
| 122060 | SLAIN motif family, member 1                                                                           | Homo sapiens |
| 56261  | hypothetical protein KIAA1434                                                                          | Homo sapiens |

|           |                                                                                                                                         |              |
|-----------|-----------------------------------------------------------------------------------------------------------------------------------------|--------------|
| 3763      | potassium inwardly-rectifying channel, subfamily J, member 6                                                                            | Homo sapiens |
| 5869      | RAB5B, member RAS oncogene family                                                                                                       | Homo sapiens |
| 6627      | small nuclear ribonucleoprotein polypeptide A'                                                                                          | Homo sapiens |
| 29116     | myosin regulatory light chain interacting protein                                                                                       | Homo sapiens |
| 23351     | KIAA0323                                                                                                                                | Homo sapiens |
| 27338     | ubiquitin-conjugating enzyme E2S                                                                                                        | Homo sapiens |
| 8013      | nuclear receptor subfamily 4, group A, member 3                                                                                         | Homo sapiens |
| 57699     | copine V                                                                                                                                | Homo sapiens |
| 7407      | valyl-tRNA synthetase                                                                                                                   | Homo sapiens |
| 143279    | HECT domain containing 2                                                                                                                | Homo sapiens |
| 439953    | similar to TRIMCyp; peptidylprolyl isomerase A (cyclophilin A); peptidylprolyl isomerase A (cyclophilin A)-like 3                       | Homo sapiens |
| 653214    | similar to TRIMCyp; peptidylprolyl isomerase A (cyclophilin A); peptidylprolyl isomerase A (cyclophilin A)-like 3                       | Homo sapiens |
| 5478      | similar to TRIMCyp; peptidylprolyl isomerase A (cyclophilin A); peptidylprolyl isomerase A (cyclophilin A)-like 3                       | Homo sapiens |
| 79568     | chromosome 2 open reading frame 47                                                                                                      | Homo sapiens |
| 113829    | solute carrier family 35, member A4                                                                                                     | Homo sapiens |
| 554251    | F-box protein 48                                                                                                                        | Homo sapiens |
| 54677     | carnitine O-octanoyltransferase                                                                                                         | Homo sapiens |
| 375743    | protein prenyltransferase alpha subunit repeat containing 1                                                                             | Homo sapiens |
| 5567      | protein kinase, cAMP-dependent, catalytic, beta                                                                                         | Homo sapiens |
| 23704     | potassium voltage-gated channel, Isk-related family, member 4                                                                           | Homo sapiens |
| 55629     | proline-rich nuclear receptor coactivator 2; similar to hCG1728885                                                                      | Homo sapiens |
| 100131261 | proline-rich nuclear receptor coactivator 2; similar to hCG1728885                                                                      | Homo sapiens |
| 126669    | Src homology 2 domain containing E                                                                                                      | Homo sapiens |
| 4677      | asparaginyl-tRNA synthetase                                                                                                             | Homo sapiens |
| 8881      | cell division cycle 16 homolog (S. cerevisiae)                                                                                          | Homo sapiens |
| 10950     | BTG family, member 3                                                                                                                    | Homo sapiens |
| 5494      | protein phosphatase 1A (formerly 2C), magnesium-dependent, alpha isoform                                                                | Homo sapiens |
| 1789      | DNA (cytosine-5-)-methyltransferase 3 beta                                                                                              | Homo sapiens |
| 54439     | RNA binding motif protein 27                                                                                                            | Homo sapiens |
| 1861      | torsin family 1, member A (torsin A)                                                                                                    | Homo sapiens |
| 10445     | microspherule protein 1                                                                                                                 | Homo sapiens |
| 5813      | purine-rich element binding protein A                                                                                                   | Homo sapiens |
| 4520      | metal-regulatory transcription factor 1                                                                                                 | Homo sapiens |
| 84109     | pyroglutamylated RFamide peptide receptor                                                                                               | Homo sapiens |
| 27235     | coenzyme Q2 homolog, prenyltransferase (yeast)                                                                                          | Homo sapiens |
| 54899     | PX domain containing serine/threonine kinase                                                                                            | Homo sapiens |
| 26608     | transducin (beta)-like 2                                                                                                                | Homo sapiens |
| 2121      | Ellis van Creveld syndrome                                                                                                              | Homo sapiens |
| 285429    | WD repeat domain 21B                                                                                                                    | Homo sapiens |
| 22883     | calsyntenin 1                                                                                                                           | Homo sapiens |
| 24148     | similar to U5 snRNP-associated 102 kDa protein (U5-102 kDa protein); PRP6 pre-mRNA processing factor 6 homolog (S. cerevisiae)          | Homo sapiens |
| 653889    | similar to U5 snRNP-associated 102 kDa protein (U5-102 kDa protein); PRP6 pre-mRNA processing factor 6 homolog (S. cerevisiae)          | Homo sapiens |
| 400916    | coiled-coil-helix-coiled-coil-helix domain containing 10                                                                                | Homo sapiens |
| 474338    | SMT3 suppressor of mif two 3 homolog 1 (S. cerevisiae); SUMO1 pseudogene 3                                                              | Homo sapiens |
| 7341      | SMT3 suppressor of mif two 3 homolog 1 (S. cerevisiae); SUMO1 pseudogene 3                                                              | Homo sapiens |
| 23509     | protein O-fucosyltransferase 1                                                                                                          | Homo sapiens |
| 57116     | zinc finger protein 695                                                                                                                 | Homo sapiens |
| 10953     | translocase of outer mitochondrial membrane 34                                                                                          | Homo sapiens |
| 5966      | v-rel reticuloendotheliosis viral oncogene homolog (avian)                                                                              | Homo sapiens |
| 9887      | Smg-7 homolog, nonsense mediated mRNA decay factor (C. elegans)                                                                         | Homo sapiens |
| 27166     | PRELI domain containing 1; similar to Px19-like protein (25 kDa protein of relevant evolutionary and lymphoid interest) (PRELI)         | Homo sapiens |
| 728666    | PRELI domain containing 1; similar to Px19-like protein (25 kDa protein of relevant evolutionary and lymphoid interest) (PRELI)         | Homo sapiens |
| 5740      | prostaglandin I2 (prostacyclin) synthase                                                                                                | Homo sapiens |
| 9806      | sparc/osteonectin, cwcv and kazal-like domains proteoglycan (testican) 2                                                                | Homo sapiens |
| 11212     | proline synthetase co-transcribed homolog (bacterial)                                                                                   | Homo sapiens |
| 23471     | translocation associated membrane protein 1                                                                                             | Homo sapiens |
| 7813      | ecotropic viral integration site 5                                                                                                      | Homo sapiens |
| 81875     | interferon stimulated exonuclease gene 20kDa-like 2                                                                                     | Homo sapiens |
| 55501     | carbohydrate (chondroitin 4) sulfotransferase 12                                                                                        | Homo sapiens |
| 3213      | homeobox B3                                                                                                                             | Homo sapiens |
| 391592    | basic leucine zipper and W2 domains 1 pseudogene 1; basic leucine zipper and W2 domains 1 like 1; basic leucine zipper and W2 domains 1 | Homo sapiens |
| 151579    | basic leucine zipper and W2 domains 1 pseudogene 1; basic leucine zipper and W2 domains 1 like 1; basic leucine zipper and W2 domains 1 | Homo sapiens |
| 9689      | basic leucine zipper and W2 domains 1 pseudogene 1; basic leucine zipper and W2 domains 1 like 1; basic leucine zipper and W2 domains 1 | Homo sapiens |
| 57572     | dedicator of cytokinesis 6                                                                                                              | Homo sapiens |
| 28991     | COMM domain containing 5                                                                                                                | Homo sapiens |
| 9716      | aquarius homolog (mouse)                                                                                                                | Homo sapiens |
| 7514      | exportin 1 (CRM1 homolog, yeast)                                                                                                        | Homo sapiens |
| 3227      | homeobox C11                                                                                                                            | Homo sapiens |
| 25847     | anaphase promoting complex subunit 13                                                                                                   | Homo sapiens |

|        |                                                                                            |              |
|--------|--------------------------------------------------------------------------------------------|--------------|
| 8676   | syntaxin 11                                                                                | Homo sapiens |
| 80345  | zinc finger and SCAN domain containing 16                                                  | Homo sapiens |
| 51427  | zinc finger protein 107                                                                    | Homo sapiens |
| 430    | achaete-scute complex homolog 2 (Drosophila)                                               | Homo sapiens |
| 93643  | tight junction associated protein 1 (peripheral)                                           | Homo sapiens |
| 10856  | RuvB-like 2 (E. coli)                                                                      | Homo sapiens |
| 11182  | solute carrier family 2 (facilitated glucose transporter), member 6                        | Homo sapiens |
| 50813  | COP9 constitutive photomorphogenic homolog subunit 7A (Arabidopsis)                        | Homo sapiens |
| 6625   | small nuclear ribonucleoprotein 70kDa (U1)                                                 | Homo sapiens |
| 1508   | cathepsin B                                                                                | Homo sapiens |
| 9338   | transcription elongation factor A (SII)-like 1                                             | Homo sapiens |
| 63967  | claspin homolog (Xenopus laevis)                                                           | Homo sapiens |
| 6718   | aldo-keto reductase family 1, member D1 (delta 4-3-ketosteroid-5-beta-reductase)           | Homo sapiens |
| 79039  | DEAD (Asp-Glu-Ala-Asp) box polypeptide 54                                                  | Homo sapiens |
| 23705  | cell adhesion molecule 1                                                                   | Homo sapiens |
| 8731   | RNA (guanine-7-) methyltransferase                                                         | Homo sapiens |
| 9900   | synaptic vesicle glycoprotein 2A                                                           | Homo sapiens |
| 8036   | soc-2 suppressor of clear homolog (C. elegans)                                             | Homo sapiens |
| 56141  | protocadherin alpha 7                                                                      | Homo sapiens |
| 11231  | SEC63 homolog (S. cerevisiae)                                                              | Homo sapiens |
| 28969  | basic leucine zipper and W2 domains 2                                                      | Homo sapiens |
| 4153   | mannose-binding lectin (protein C) 2, soluble (opsonic defect)                             | Homo sapiens |
| 729747 | similar to zinc finger protein 709                                                         | Homo sapiens |
| 5573   | protein kinase, cAMP-dependent, regulatory, type I, alpha (tissue specific extinguisher 1) | Homo sapiens |
| 1950   | epidermal growth factor (beta-urogastrone)                                                 | Homo sapiens |
| 6888   | transaldolase 1                                                                            | Homo sapiens |
| 7704   | zinc finger and BTB domain containing 16                                                   | Homo sapiens |
| 8540   | alkylglycerone phosphate synthase                                                          | Homo sapiens |
| 55824  | phosphoprotein associated with glycosphingolipid microdomains 1                            | Homo sapiens |
| 54514  | DEAD (Asp-Glu-Ala-Asp) box polypeptide 4                                                   | Homo sapiens |
| 79685  | SAP30-like                                                                                 | Homo sapiens |
| 84260  | trichoplein, keratin filament binding                                                      | Homo sapiens |
| 3034   | histidine ammonia-lyase                                                                    | Homo sapiens |
| 79084  | WD repeat domain 77                                                                        | Homo sapiens |
| 8570   | KH-type splicing regulatory protein                                                        | Homo sapiens |
| 5435   | polymerase (RNA) II (DNA directed) polypeptide F                                           | Homo sapiens |
| 23140  | zinc finger, ZZ-type with EF-hand domain 1                                                 | Homo sapiens |
| 400720 | zinc finger protein 772                                                                    | Homo sapiens |
| 6774   | signal transducer and activator of transcription 3 (acute-phase response factor)           | Homo sapiens |
| 6626   | small nuclear ribonucleoprotein polypeptide A                                              | Homo sapiens |
| 4043   | low density lipoprotein receptor-related protein associated protein 1                      | Homo sapiens |
| 5286   | phosphoinositide-3-kinase, class 2, alpha polypeptide                                      | Homo sapiens |
| 1954   | multiple EGF-like-domains 8                                                                | Homo sapiens |
| 3454   | interferon (alpha, beta and omega) receptor 1                                              | Homo sapiens |
| 80152  | centromere protein T                                                                       | Homo sapiens |
| 3990   | lipase, hepatic                                                                            | Homo sapiens |
| 11311  | vacuolar protein sorting 45 homolog (S. cerevisiae)                                        | Homo sapiens |
| 56980  | PR domain containing 10                                                                    | Homo sapiens |
| 642393 | similar to mitochondrial ribosomal protein L20; mitochondrial ribosomal protein L20        | Homo sapiens |
| 55052  | similar to mitochondrial ribosomal protein L20; mitochondrial ribosomal protein L20        | Homo sapiens |
| 126637 | trichohyalin-like 1                                                                        | Homo sapiens |
| 7073   | TIAL cytotoxic granule-associated RNA binding protein-like 1                               | Homo sapiens |
| 85480  | thymic stromal lymphopoietin                                                               | Homo sapiens |
| 57799  | RAB40C, member RAS oncogene family                                                         | Homo sapiens |
| 81789  | tigger transposable element derived 6                                                      | Homo sapiens |
| 57035  | chromosome 1 open reading frame 63                                                         | Homo sapiens |
| 3992   | fatty acid desaturase 1                                                                    | Homo sapiens |
| 10471  | prefoldin subunit 6                                                                        | Homo sapiens |
| 56975  | family with sequence similarity 20, member C                                               | Homo sapiens |
| 2326   | flavin containing monooxygenase 1                                                          | Homo sapiens |
| 1849   | dual specificity phosphatase 7                                                             | Homo sapiens |
| 9832   | Janus kinase and microtubule interacting protein 2                                         | Homo sapiens |
| 79788  | zinc finger protein 665                                                                    | Homo sapiens |
| 23107  | mitochondrial ribosomal protein S27                                                        | Homo sapiens |
| 3983   | actin binding LIM protein 1                                                                | Homo sapiens |
| 948    | CD36 molecule (thrombospondin receptor)                                                    | Homo sapiens |
| 161291 | transmembrane protein 30B                                                                  | Homo sapiens |
| 3423   | iduronate 2-sulfatase                                                                      | Homo sapiens |
| 8971   | H1 histone family, member X                                                                | Homo sapiens |
| 280636 | chromosome 11 open reading frame 31                                                        | Homo sapiens |
| 9497   | solute carrier family 4, sodium bicarbonate cotransporter, member 7                        | Homo sapiens |
| 353189 | solute carrier organic anion transporter family, member 4C1                                | Homo sapiens |
| 332    | baculoviral IAP repeat-containing 5                                                        | Homo sapiens |
| 728621 | hypothetical protein LOC728621                                                             | Homo sapiens |
| 5470   | protein phosphatase, EF-hand calcium binding domain 2                                      | Homo sapiens |
| 10628  | thioredoxin interacting protein                                                            | Homo sapiens |
| 64960  | mitochondrial ribosomal protein S15                                                        | Homo sapiens |
| 54558  | spermatogenesis associated 6                                                               | Homo sapiens |

|           |                                                                                                                                                        |              |
|-----------|--------------------------------------------------------------------------------------------------------------------------------------------------------|--------------|
| 1004      | cadherin 6, type 2, K-cadherin (fetal kidney)                                                                                                          | Homo sapiens |
| 684959    | TATA box binding protein (TBP)-associated factor, RNA polymerase I, D, 41kDa; small nucleolar RNA, H/ACA box 32; small nucleolar RNA, H/ACA box 25     | Homo sapiens |
| 79101     | TATA box binding protein (TBP)-associated factor, RNA polymerase I, D, 41kDa; small nucleolar RNA, H/ACA box 32; small nucleolar RNA, H/ACA box 25     | Homo sapiens |
| 692063    | TATA box binding protein (TBP)-associated factor, RNA polymerase I, D, 41kDa; small nucleolar RNA, H/ACA box 32; small nucleolar RNA, H/ACA box 25     | Homo sapiens |
| 84532     | acyl-CoA synthetase short-chain family member 1                                                                                                        | Homo sapiens |
| 7733      | zinc finger protein 180                                                                                                                                | Homo sapiens |
| 567       | beta-2-microglobulin                                                                                                                                   | Homo sapiens |
| 55339     | WD repeat domain 33                                                                                                                                    | Homo sapiens |
| 167555    | family with sequence similarity 151, member B                                                                                                          | Homo sapiens |
| 84233     | transmembrane protein 126A                                                                                                                             | Homo sapiens |
| 5934      | retinoblastoma-like 2 (p130)                                                                                                                           | Homo sapiens |
| 55374     | transmembrane and coiled-coil domains 6                                                                                                                | Homo sapiens |
| 80262     | chromosome 16 open reading frame 70                                                                                                                    | Homo sapiens |
| 64708     | COP9 constitutive photomorphogenic homolog subunit 7B (Arabidopsis)                                                                                    | Homo sapiens |
| 9469      | carbohydrate (chondroitin 6) sulfotransferase 3                                                                                                        | Homo sapiens |
| 56475     | reprimo, TP53 dependent G2 arrest mediator candidate                                                                                                   | Homo sapiens |
| 7862      | bromodomain and PHD finger containing, 1                                                                                                               | Homo sapiens |
| 199699    | DAN domain family, member 5                                                                                                                            | Homo sapiens |
| 6011      | G protein-coupled receptor kinase 1                                                                                                                    | Homo sapiens |
| 201931    | transmembrane protein 192                                                                                                                              | Homo sapiens |
| 81572     | p53 and DNA-damage regulated 1                                                                                                                         | Homo sapiens |
| 23367     | La ribonucleoprotein domain family, member 1                                                                                                           | Homo sapiens |
| 128486    | fat storage-inducing transmembrane protein 2                                                                                                           | Homo sapiens |
| 55627     | sphingomyelin phosphodiesterase 4, neutral membrane (neutral sphingomyelinase-3)                                                                       | Homo sapiens |
| 221477    | chromosome 6 open reading frame 89                                                                                                                     | Homo sapiens |
| 378807    | cation channel, sperm associated 4                                                                                                                     | Homo sapiens |
| 115426    | ubiquitin-like with PHD and ring finger domains 2                                                                                                      | Homo sapiens |
| 10240     | mitochondrial ribosomal protein S31                                                                                                                    | Homo sapiens |
| 54852     | progesterin and adipoQ receptor family member V                                                                                                        | Homo sapiens |
| 128876    | family with sequence similarity 83, member C                                                                                                           | Homo sapiens |
| 26276     | vacuolar protein sorting 33 homolog B (yeast)                                                                                                          | Homo sapiens |
| 285513    | GPRIN family member 3                                                                                                                                  | Homo sapiens |
| 5334      | phospholipase C-like 1                                                                                                                                 | Homo sapiens |
| 5442      | polymerase (RNA) mitochondrial (DNA directed)                                                                                                          | Homo sapiens |
| 9472      | A kinase (PRKA) anchor protein 6                                                                                                                       | Homo sapiens |
| 400011    | suppressor of Ty 16 homolog (S. cerevisiae); suppressor of Ty 16 homolog (S. cerevisiae) pseudogene                                                    | Homo sapiens |
| 11198     | suppressor of Ty 16 homolog (S. cerevisiae); suppressor of Ty 16 homolog (S. cerevisiae) pseudogene                                                    | Homo sapiens |
| 80739     | chromosome 6 open reading frame 25                                                                                                                     | Homo sapiens |
| 55695     | NOL1/NOP2/Sun domain family, member 5                                                                                                                  | Homo sapiens |
| 56902     | partner of NOB1 homolog (S. cerevisiae)                                                                                                                | Homo sapiens |
| 10681     | guanine nucleotide binding protein (G protein), beta 5                                                                                                 | Homo sapiens |
| 7204      | triple functional domain (PTPRF interacting)                                                                                                           | Homo sapiens |
| 23305     | acyl-CoA synthetase long-chain family member 6                                                                                                         | Homo sapiens |
| 2317      | filamin B, beta (actin binding protein 278)                                                                                                            | Homo sapiens |
| 1406      | cone-rod homeobox                                                                                                                                      | Homo sapiens |
| 51307     | family with sequence similarity 53, member C                                                                                                           | Homo sapiens |
| 10802     | SEC24 family, member A (S. cerevisiae)                                                                                                                 | Homo sapiens |
| 9750      | family with sequence similarity 65, member B                                                                                                           | Homo sapiens |
| 55336     | F-box and leucine-rich repeat protein 8                                                                                                                | Homo sapiens |
| 646347    | spermine synthase; similar to spermine synthase                                                                                                        | Homo sapiens |
| 642590    | spermine synthase; similar to spermine synthase                                                                                                        | Homo sapiens |
| 6611      | spermine synthase; similar to spermine synthase                                                                                                        | Homo sapiens |
| 85477     | scinderin                                                                                                                                              | Homo sapiens |
| 8322      | frizzled homolog 4 (Drosophila)                                                                                                                        | Homo sapiens |
| 171484    | family with sequence similarity 9, member C                                                                                                            | Homo sapiens |
| 7083      | thymidine kinase 1, soluble                                                                                                                            | Homo sapiens |
| 54964     | chromosome 1 open reading frame 56                                                                                                                     | Homo sapiens |
| 27297     | CGRP receptor component                                                                                                                                | Homo sapiens |
| 27434     | polymerase (DNA directed), mu                                                                                                                          | Homo sapiens |
| 729143    | myosin phosphatase Rho interacting protein; similar to Myosin phosphatase Rho-interacting protein (Rho-interacting protein 3) (M-RIP) (RIP3) (p116Rip) | Homo sapiens |
| 23164     | myosin phosphatase Rho interacting protein; similar to Myosin phosphatase Rho-interacting protein (Rho-interacting protein 3) (M-RIP) (RIP3) (p116Rip) | Homo sapiens |
| 7357      | UDP-glucose ceramide glucosyltransferase                                                                                                               | Homo sapiens |
| 114990    | vasorin                                                                                                                                                | Homo sapiens |
| 8106      | poly(A) binding protein, nuclear 1                                                                                                                     | Homo sapiens |
| 154881    | potassium channel tetramerisation domain containing 7                                                                                                  | Homo sapiens |
| 10220     | growth differentiation factor 11                                                                                                                       | Homo sapiens |
| 55830     | glycosyltransferase 8 domain containing 1                                                                                                              | Homo sapiens |
| 4790      | nuclear factor of kappa light polypeptide gene enhancer in B-cells 1                                                                                   | Homo sapiens |
| 65078     | reticulum 4 receptor                                                                                                                                   | Homo sapiens |
| 100037280 | ubiquitin-conjugating enzyme E2D 3 (UBC4/5 homolog, yeast); ubiquitin-conjugating enzyme E2D 3 pseudogene                                              | Homo sapiens |

|           |                                                                                                                                                                                    |              |
|-----------|------------------------------------------------------------------------------------------------------------------------------------------------------------------------------------|--------------|
| 7323      | ubiquitin-conjugating enzyme E2D 3 (UBC4/5 homolog, yeast); ubiquitin-conjugating enzyme E2D 3 pseudogene                                                                          | Homo sapiens |
| 25973     | prolyl-tRNA synthetase 2, mitochondrial (putative)                                                                                                                                 | Homo sapiens |
| 3308      | heat shock 70kDa protein 4                                                                                                                                                         | Homo sapiens |
| 4539      | NADH-ubiquinone oxidoreductase chain 4L; NADH-ubiquinone oxidoreductase chain 4                                                                                                    | Homo sapiens |
| 4538      | NADH-ubiquinone oxidoreductase chain 4L; NADH-ubiquinone oxidoreductase chain 4                                                                                                    | Homo sapiens |
| 6775072   | NADH-ubiquinone oxidoreductase chain 4L; NADH-ubiquinone oxidoreductase chain 4                                                                                                    | Homo sapiens |
| 6775071   | NADH-ubiquinone oxidoreductase chain 4L; NADH-ubiquinone oxidoreductase chain 4                                                                                                    | Homo sapiens |
| 64771     | chromosome 6 open reading frame 106                                                                                                                                                | Homo sapiens |
| 53340     | sperm autoantigenic protein 17                                                                                                                                                     | Homo sapiens |
| 11279     | Kruppel-like factor 8                                                                                                                                                              | Homo sapiens |
| 55054     | ATG16 autophagy related 16-like 1 ( <i>S. cerevisiae</i> )                                                                                                                         | Homo sapiens |
| 116983    | ArfGAP with coiled-coil, ankyrin repeat and PH domains 3                                                                                                                           | Homo sapiens |
| 11334     | tumor suppressor candidate 2                                                                                                                                                       | Homo sapiens |
| 56254     | ring finger protein 20                                                                                                                                                             | Homo sapiens |
| 22950     | solute carrier family 4 (anion exchanger), member 1, adaptor protein                                                                                                               | Homo sapiens |
| 9053      | microtubule-associated protein 7                                                                                                                                                   | Homo sapiens |
| 343578    | chromosome 20 open reading frame 95                                                                                                                                                | Homo sapiens |
| 10746     | mitogen-activated protein kinase kinase kinase 2                                                                                                                                   | Homo sapiens |
| 399979    | sorting nexin 19                                                                                                                                                                   | Homo sapiens |
| 3037      | hyaluronan synthase 2                                                                                                                                                              | Homo sapiens |
| 7975      | v-maf musculoaponeurotic fibrosarcoma oncogene homolog K (avian)                                                                                                                   | Homo sapiens |
| 23336     | synemin, intermediate filament protein                                                                                                                                             | Homo sapiens |
| 2618      | phosphoribosylglycinamide formyltransferase, phosphoribosylglycinamide synthetase, phosphoribosylaminoimidazole synthetase                                                         | Homo sapiens |
| 55216     | chromosome 11 open reading frame 57                                                                                                                                                | Homo sapiens |
| 91368     | CDKN2A interacting protein N-terminal like                                                                                                                                         | Homo sapiens |
| 3516      | recombination signal binding protein for immunoglobulin kappa J region                                                                                                             | Homo sapiens |
| 63979     | fidgetin-like 1                                                                                                                                                                    | Homo sapiens |
| 4289      | muskelin 1, intracellular mediator containing kelch motifs                                                                                                                         | Homo sapiens |
| 254272    | TBC1 domain family, member 28                                                                                                                                                      | Homo sapiens |
| 22906     | trafficking protein, kinesin binding 1                                                                                                                                             | Homo sapiens |
| 10773     | zinc finger and BTB domain containing 6                                                                                                                                            | Homo sapiens |
| 2736      | GLI family zinc finger 2                                                                                                                                                           | Homo sapiens |
| 857       | caveolin 1, caveolae protein, 22kDa                                                                                                                                                | Homo sapiens |
| 79735     | TBC1 domain family, member 17                                                                                                                                                      | Homo sapiens |
| 9927      | mitofusin 2                                                                                                                                                                        | Homo sapiens |
| 651       | bone morphogenetic protein 3                                                                                                                                                       | Homo sapiens |
| 85236     | histone cluster 1, H2bk                                                                                                                                                            | Homo sapiens |
| 6838      | surfeit 6                                                                                                                                                                          | Homo sapiens |
| 1857      | dishevelled, dsh homolog 3 ( <i>Drosophila</i> )                                                                                                                                   | Homo sapiens |
| 7417      | voltage-dependent anion channel 2                                                                                                                                                  | Homo sapiens |
| 815       | calcium/calmodulin-dependent protein kinase II alpha                                                                                                                               | Homo sapiens |
| 128637    | TBC1 domain family, member 20                                                                                                                                                      | Homo sapiens |
| 100271831 | hypothetical LOC100271831; mitogen-activated protein kinase 3                                                                                                                      | Homo sapiens |
| 5595      | hypothetical LOC100271831; mitogen-activated protein kinase 3                                                                                                                      | Homo sapiens |
| 113189    | carbohydrate (N-acetylgalactosamine 4-O) sulfotransferase 14                                                                                                                       | Homo sapiens |
| 9559      | vacuolar protein sorting 26 homolog A ( <i>S. pombe</i> )                                                                                                                          | Homo sapiens |
| 2887      | growth factor receptor-bound protein 10                                                                                                                                            | Homo sapiens |
| 27044     | staphylococcal nuclease and tudor domain containing 1                                                                                                                              | Homo sapiens |
| 11190     | centrosomal protein 250kDa                                                                                                                                                         | Homo sapiens |
| 1371      | coproporphyrinogen oxidase                                                                                                                                                         | Homo sapiens |
| 7067      | thyroid hormone receptor, alpha (erythroblastic leukemia viral (v-erb-a) oncogene homolog, avian)                                                                                  | Homo sapiens |
| 1615      | aspartyl-tRNA synthetase                                                                                                                                                           | Homo sapiens |
| 150468    | cytoskeleton associated protein 2-like                                                                                                                                             | Homo sapiens |
| 25977     | NECAP endocytosis associated 1                                                                                                                                                     | Homo sapiens |
| 55187     | vacuolar protein sorting 13 homolog D ( <i>S. cerevisiae</i> )                                                                                                                     | Homo sapiens |
| 84270     | chromosome 9 open reading frame 89                                                                                                                                                 | Homo sapiens |
| 57180     | ARP3 actin-related protein 3 homolog B (yeast)                                                                                                                                     | Homo sapiens |
| 84612     | par-6 partitioning defective 6 homolog beta ( <i>C. elegans</i> )                                                                                                                  | Homo sapiens |
| 112398    | egl nine homolog 2 ( <i>C. elegans</i> )                                                                                                                                           | Homo sapiens |
| 1185      | chloride channel 6                                                                                                                                                                 | Homo sapiens |
| 26953     | RAN binding protein 6                                                                                                                                                              | Homo sapiens |
| 85016     | chromosome 11 open reading frame 70                                                                                                                                                | Homo sapiens |
| 51379     | cytokine receptor-like factor 3                                                                                                                                                    | Homo sapiens |
| 55326     | 1-acylglycerol-3-phosphate O-acyltransferase 5 (lysophosphatidic acid acyltransferase, epsilon)                                                                                    | Homo sapiens |
| 4074      | mannose-6-phosphate receptor (cation dependent)                                                                                                                                    | Homo sapiens |
| 6689      | Spi-B transcription factor (Spi-1/PU.1 related)                                                                                                                                    | Homo sapiens |
| 55312     | riboflavin kinase                                                                                                                                                                  | Homo sapiens |
| 474383    | coagulation factor VIII-associated (intronic transcript) 2; coagulation factor VIII-associated (intronic transcript) 3; coagulation factor VIII-associated (intronic transcript) 1 | Homo sapiens |
| 474384    | coagulation factor VIII-associated (intronic transcript) 2; coagulation factor VIII-associated (intronic transcript) 3; coagulation factor VIII-associated (intronic transcript) 1 | Homo sapiens |

|           |                                                                                                                                                                                                                                                                                                                                                                                                                                                                    |              |
|-----------|--------------------------------------------------------------------------------------------------------------------------------------------------------------------------------------------------------------------------------------------------------------------------------------------------------------------------------------------------------------------------------------------------------------------------------------------------------------------|--------------|
| 8263      | coagulation factor VIII-associated (intronic transcript) 2; coagulation factor VIII-associated (intronic transcript) 3; coagulation factor VIII-associated (intronic transcript) 1                                                                                                                                                                                                                                                                                 | Homo sapiens |
| 3837      | karyopherin (importin) beta 1                                                                                                                                                                                                                                                                                                                                                                                                                                      | Homo sapiens |
| 92815     | histone cluster 3, H2a                                                                                                                                                                                                                                                                                                                                                                                                                                             | Homo sapiens |
| 91749     | KIAA1919                                                                                                                                                                                                                                                                                                                                                                                                                                                           | Homo sapiens |
| 56882     | CDC42 small effector 1                                                                                                                                                                                                                                                                                                                                                                                                                                             | Homo sapiens |
| 10036     | chromatin assembly factor 1, subunit A (p150)                                                                                                                                                                                                                                                                                                                                                                                                                      | Homo sapiens |
| 57514     | Cdc42 GTPase-activating protein                                                                                                                                                                                                                                                                                                                                                                                                                                    | Homo sapiens |
| 79930     | docking protein 3                                                                                                                                                                                                                                                                                                                                                                                                                                                  | Homo sapiens |
| 130074    | family with sequence similarity 168, member B                                                                                                                                                                                                                                                                                                                                                                                                                      | Homo sapiens |
| 83935     | transmembrane protein 133                                                                                                                                                                                                                                                                                                                                                                                                                                          | Homo sapiens |
| 667       | dystonin                                                                                                                                                                                                                                                                                                                                                                                                                                                           | Homo sapiens |
| 57630     | SH3 domain containing ring finger 1                                                                                                                                                                                                                                                                                                                                                                                                                                | Homo sapiens |
| 5300      | peptidylprolyl cis/trans isomerase, NIMA-interacting 1                                                                                                                                                                                                                                                                                                                                                                                                             | Homo sapiens |
| 6535      | solute carrier family 6 (neurotransmitter transporter, creatine), member 8                                                                                                                                                                                                                                                                                                                                                                                         | Homo sapiens |
| 7818      | death associated protein 3                                                                                                                                                                                                                                                                                                                                                                                                                                         | Homo sapiens |
| 6189      | ribosomal protein S3A pseudogene 5; ribosomal protein S3a pseudogene 47; ribosomal protein S3a pseudogene 49; ribosomal protein S3A; hypothetical LOC100131699; hypothetical LOC100130107                                                                                                                                                                                                                                                                          | Homo sapiens |
| 100130107 | ribosomal protein S3A pseudogene 5; ribosomal protein S3a pseudogene 47; ribosomal protein S3a pseudogene 49; ribosomal protein S3A; hypothetical LOC100131699; hypothetical LOC100130107                                                                                                                                                                                                                                                                          | Homo sapiens |
| 400652    | ribosomal protein S3A pseudogene 5; ribosomal protein S3a pseudogene 47; ribosomal protein S3a pseudogene 49; ribosomal protein S3A; hypothetical LOC100131699; hypothetical LOC100130107                                                                                                                                                                                                                                                                          | Homo sapiens |
| 146053    | ribosomal protein S3A pseudogene 5; ribosomal protein S3a pseudogene 47; ribosomal protein S3a pseudogene 49; ribosomal protein S3A; hypothetical LOC100131699; hypothetical LOC100130107                                                                                                                                                                                                                                                                          | Homo sapiens |
| 439992    | ribosomal protein S3A pseudogene 5; ribosomal protein S3a pseudogene 47; ribosomal protein S3a pseudogene 49; ribosomal protein S3A; hypothetical LOC100131699; hypothetical LOC100130107                                                                                                                                                                                                                                                                          | Homo sapiens |
| 100131699 | ribosomal protein S3A pseudogene 5; ribosomal protein S3a pseudogene 47; ribosomal protein S3a pseudogene 49; ribosomal protein S3A; hypothetical LOC100131699; hypothetical LOC100130107                                                                                                                                                                                                                                                                          | Homo sapiens |
| 79742     | chromosome X open reading frame 36                                                                                                                                                                                                                                                                                                                                                                                                                                 | Homo sapiens |
| 645317    | coiled-coil-helix-coiled-coil-helix domain containing 2; similar to coiled-coil-helix-coiled-coil-helix domain containing 2                                                                                                                                                                                                                                                                                                                                        | Homo sapiens |
| 728324    | coiled-coil-helix-coiled-coil-helix domain containing 2; similar to coiled-coil-helix-coiled-coil-helix domain containing 2                                                                                                                                                                                                                                                                                                                                        | Homo sapiens |
| 51142     | coiled-coil-helix-coiled-coil-helix domain containing 2; similar to coiled-coil-helix-coiled-coil-helix domain containing 2                                                                                                                                                                                                                                                                                                                                        | Homo sapiens |
| 7371      | uridine-cytidine kinase 2                                                                                                                                                                                                                                                                                                                                                                                                                                          | Homo sapiens |
| 84919     | protein phosphatase 1, regulatory (inhibitor) subunit 15B                                                                                                                                                                                                                                                                                                                                                                                                          | Homo sapiens |
| 84255     | solute carrier family 37 (glycerol-3-phosphate transporter), member 3                                                                                                                                                                                                                                                                                                                                                                                              | Homo sapiens |
| 84549     | MAK16 homolog ( <i>S. cerevisiae</i> )                                                                                                                                                                                                                                                                                                                                                                                                                             | Homo sapiens |
| 2872      | MAP kinase interacting serine/threonine kinase 2                                                                                                                                                                                                                                                                                                                                                                                                                   | Homo sapiens |
| 9688      | nucleoporin 93kDa                                                                                                                                                                                                                                                                                                                                                                                                                                                  | Homo sapiens |
| 282996    | RNA binding motif protein 20                                                                                                                                                                                                                                                                                                                                                                                                                                       | Homo sapiens |
| 200030    | neuroblastoma breakpoint family, member 15; neuroblastoma breakpoint family, member 14; neuroblastoma breakpoint family, member 9; neuroblastoma breakpoint family, member 11; neuroblastoma breakpoint family, member 11-like; neuroblastoma breakpoint family, member 10; neuroblastoma breakpoint family, member 12; neuroblastoma breakpoint family, member 20; neuroblastoma breakpoint family, member 1; KIAA1245; neuroblastoma breakpoint family, member 8 | Homo sapiens |
| 149013    | neuroblastoma breakpoint family, member 15; neuroblastoma breakpoint family, member 14; neuroblastoma breakpoint family, member 9; neuroblastoma breakpoint family, member 11; neuroblastoma breakpoint family, member 11-like; neuroblastoma breakpoint family, member 10; neuroblastoma breakpoint family, member 12; neuroblastoma breakpoint family, member 20; neuroblastoma breakpoint family, member 1; KIAA1245; neuroblastoma breakpoint family, member 8 | Homo sapiens |
| 728841    | neuroblastoma breakpoint family, member 15; neuroblastoma breakpoint family, member 14; neuroblastoma breakpoint family, member 9; neuroblastoma breakpoint family, member 11; neuroblastoma breakpoint family, member 11-like; neuroblastoma breakpoint family, member 10; neuroblastoma breakpoint family, member 12; neuroblastoma breakpoint family, member 20; neuroblastoma breakpoint family, member 1; KIAA1245; neuroblastoma breakpoint family, member 8 | Homo sapiens |
| 100132406 | neuroblastoma breakpoint family, member 15; neuroblastoma breakpoint family, member 14; neuroblastoma breakpoint family, member 9; neuroblastoma breakpoint family, member 11; neuroblastoma breakpoint family, member 11-like; neuroblastoma breakpoint family, member 10; neuroblastoma breakpoint family, member 12; neuroblastoma breakpoint family, member 20; neuroblastoma breakpoint family, member 1; KIAA1245; neuroblastoma breakpoint family, member 8 | Homo sapiens |
| 400818    | neuroblastoma breakpoint family, member 15; neuroblastoma breakpoint family, member 14; neuroblastoma breakpoint family, member 9; neuroblastoma breakpoint family, member 11; neuroblastoma breakpoint family, member 11-like; neuroblastoma breakpoint family, member 10; neuroblastoma breakpoint family, member 12; neuroblastoma breakpoint family, member 20; neuroblastoma breakpoint family, member 1; KIAA1245; neuroblastoma breakpoint family, member 8 | Homo sapiens |

|        |                                                                                                                                                                                                                                                                                                                                                                                                                                                                                |              |
|--------|--------------------------------------------------------------------------------------------------------------------------------------------------------------------------------------------------------------------------------------------------------------------------------------------------------------------------------------------------------------------------------------------------------------------------------------------------------------------------------|--------------|
| 440675 | neuroblastoma breakpoint family, member 15; neuroblastoma breakpoint family, member 14;<br>neuroblastoma breakpoint family, member 9; neuroblastoma breakpoint family, member 11;<br>neuroblastoma breakpoint family, member 11-like; neuroblastoma breakpoint family, member 10;<br>neuroblastoma breakpoint family, member 12; neuroblastoma breakpoint family, member 20;<br>neuroblastoma breakpoint family, member 1; KIAA1245; neuroblastoma breakpoint family, member 8 | Homo sapiens |
| 55672  | neuroblastoma breakpoint family, member 15; neuroblastoma breakpoint family, member 14;<br>neuroblastoma breakpoint family, member 9; neuroblastoma breakpoint family, member 11;<br>neuroblastoma breakpoint family, member 11-like; neuroblastoma breakpoint family, member 10;<br>neuroblastoma breakpoint family, member 12; neuroblastoma breakpoint family, member 20;<br>neuroblastoma breakpoint family, member 1; KIAA1245; neuroblastoma breakpoint family, member 8 | Homo sapiens |
| 25832  | neuroblastoma breakpoint family, member 15; neuroblastoma breakpoint family, member 14;<br>neuroblastoma breakpoint family, member 9; neuroblastoma breakpoint family, member 11;<br>neuroblastoma breakpoint family, member 11-like; neuroblastoma breakpoint family, member 10;<br>neuroblastoma breakpoint family, member 12; neuroblastoma breakpoint family, member 20;<br>neuroblastoma breakpoint family, member 1; KIAA1245; neuroblastoma breakpoint family, member 8 | Homo sapiens |
| 728912 | neuroblastoma breakpoint family, member 15; neuroblastoma breakpoint family, member 14;<br>neuroblastoma breakpoint family, member 9; neuroblastoma breakpoint family, member 11;<br>neuroblastoma breakpoint family, member 11-like; neuroblastoma breakpoint family, member 10;<br>neuroblastoma breakpoint family, member 12; neuroblastoma breakpoint family, member 20;<br>neuroblastoma breakpoint family, member 1; KIAA1245; neuroblastoma breakpoint family, member 8 | Homo sapiens |
| 440670 | neuroblastoma breakpoint family, member 15; neuroblastoma breakpoint family, member 14;<br>neuroblastoma breakpoint family, member 9; neuroblastoma breakpoint family, member 11;<br>neuroblastoma breakpoint family, member 11-like; neuroblastoma breakpoint family, member 10;<br>neuroblastoma breakpoint family, member 12; neuroblastoma breakpoint family, member 20;<br>neuroblastoma breakpoint family, member 1; KIAA1245; neuroblastoma breakpoint family, member 8 | Homo sapiens |
| 284565 | neuroblastoma breakpoint family, member 15; neuroblastoma breakpoint family, member 14;<br>neuroblastoma breakpoint family, member 9; neuroblastoma breakpoint family, member 11;<br>neuroblastoma breakpoint family, member 11-like; neuroblastoma breakpoint family, member 10;<br>neuroblastoma breakpoint family, member 12; neuroblastoma breakpoint family, member 20;<br>neuroblastoma breakpoint family, member 1; KIAA1245; neuroblastoma breakpoint family, member 8 | Homo sapiens |
| 165918 | ring finger protein 168                                                                                                                                                                                                                                                                                                                                                                                                                                                        | Homo sapiens |
| 54821  | excision repair cross-complementing rodent repair deficiency, complementation group 6-like                                                                                                                                                                                                                                                                                                                                                                                     | Homo sapiens |
| 26019  | UPF2 regulator of nonsense transcripts homolog (yeast)                                                                                                                                                                                                                                                                                                                                                                                                                         | Homo sapiens |
| 84286  | transmembrane protein 175                                                                                                                                                                                                                                                                                                                                                                                                                                                      | Homo sapiens |
| 2395   | frataxin                                                                                                                                                                                                                                                                                                                                                                                                                                                                       | Homo sapiens |
| 129685 | TAF8 RNA polymerase II, TATA box binding protein (TBP)-associated factor, 43kDa                                                                                                                                                                                                                                                                                                                                                                                                | Homo sapiens |
| 113178 | secretory carrier membrane protein 4                                                                                                                                                                                                                                                                                                                                                                                                                                           | Homo sapiens |
| 2967   | general transcription factor IIIH, polypeptide 3, 34kDa                                                                                                                                                                                                                                                                                                                                                                                                                        | Homo sapiens |
| 55837  | E2F-associated phosphoprotein                                                                                                                                                                                                                                                                                                                                                                                                                                                  | Homo sapiens |
| 83590  | transmembrane and ubiquitin-like domain containing 1                                                                                                                                                                                                                                                                                                                                                                                                                           | Homo sapiens |
| 79666  | pleckstrin homology domain containing, family F (with FYVE domain) member 2                                                                                                                                                                                                                                                                                                                                                                                                    | Homo sapiens |
| 130367 | sphingosine-1-phosphate phosphatase 2                                                                                                                                                                                                                                                                                                                                                                                                                                          | Homo sapiens |
| 3324   | heat shock protein 90kDa alpha (cytosolic), class A member 2; heat shock protein 90kDa alpha (cytosolic), class A member 1                                                                                                                                                                                                                                                                                                                                                     | Homo sapiens |
| 3320   | heat shock protein 90kDa alpha (cytosolic), class A member 2; heat shock protein 90kDa alpha (cytosolic), class A member 1                                                                                                                                                                                                                                                                                                                                                     | Homo sapiens |
| 9045   | ribosomal protein L14                                                                                                                                                                                                                                                                                                                                                                                                                                                          | Homo sapiens |
| 5462   | POU class 5 homeobox 1B                                                                                                                                                                                                                                                                                                                                                                                                                                                        | Homo sapiens |
| 375061 | family with sequence similarity 89, member A                                                                                                                                                                                                                                                                                                                                                                                                                                   | Homo sapiens |
| 246181 | aldo-keto reductase family 7-like                                                                                                                                                                                                                                                                                                                                                                                                                                              | Homo sapiens |
| 260425 | membrane associated guanylate kinase, WW and PDZ domain containing 3                                                                                                                                                                                                                                                                                                                                                                                                           | Homo sapiens |
| 23074  | UHRF1 binding protein 1-like                                                                                                                                                                                                                                                                                                                                                                                                                                                   | Homo sapiens |
| 23671  | transmembrane protein with EGF-like and two follistatin-like domains 2                                                                                                                                                                                                                                                                                                                                                                                                         | Homo sapiens |
| 51248  | PDZ domain containing 11                                                                                                                                                                                                                                                                                                                                                                                                                                                       | Homo sapiens |
| 55802  | DCP1 decapping enzyme homolog A (S. cerevisiae)                                                                                                                                                                                                                                                                                                                                                                                                                                | Homo sapiens |
| 11269  | DEAD (Asp-Glu-Ala-As) box polypeptide 19B                                                                                                                                                                                                                                                                                                                                                                                                                                      | Homo sapiens |
| 83716  | cysteine-rich secretory protein LCCL domain containing 2                                                                                                                                                                                                                                                                                                                                                                                                                       | Homo sapiens |
| 7345   | ubiquitin carboxyl-terminal esterase L1 (ubiquitin thiolesterase)                                                                                                                                                                                                                                                                                                                                                                                                              | Homo sapiens |
| 90060  | coiled-coil domain containing 120                                                                                                                                                                                                                                                                                                                                                                                                                                              | Homo sapiens |
| 55287  | transmembrane protein 40                                                                                                                                                                                                                                                                                                                                                                                                                                                       | Homo sapiens |
| 51218  | glutaredoxin 5                                                                                                                                                                                                                                                                                                                                                                                                                                                                 | Homo sapiens |
| 7320   | ubiquitin-conjugating enzyme E2B (RAD6 homolog)                                                                                                                                                                                                                                                                                                                                                                                                                                | Homo sapiens |
| 200186 | CREB regulated transcription coactivator 2                                                                                                                                                                                                                                                                                                                                                                                                                                     | Homo sapiens |
| 8803   | succinate-CoA ligase, ADP-forming, beta subunit                                                                                                                                                                                                                                                                                                                                                                                                                                | Homo sapiens |
| 23510  | potassium channel tetramerisation domain containing 2                                                                                                                                                                                                                                                                                                                                                                                                                          | Homo sapiens |
| 81     | actinin, alpha 4                                                                                                                                                                                                                                                                                                                                                                                                                                                               | Homo sapiens |
| 10519  | calcium and integrin binding 1 (calmyrin)                                                                                                                                                                                                                                                                                                                                                                                                                                      | Homo sapiens |
| 5580   | protein kinase C, delta                                                                                                                                                                                                                                                                                                                                                                                                                                                        | Homo sapiens |
| 8821   | inositol polyphosphate-4-phosphatase, type II, 105kDa                                                                                                                                                                                                                                                                                                                                                                                                                          | Homo sapiens |
| 29888  | striatin, calmodulin binding protein 4                                                                                                                                                                                                                                                                                                                                                                                                                                         | Homo sapiens |
| 23034  | sterile alpha motif domain containing 4A                                                                                                                                                                                                                                                                                                                                                                                                                                       | Homo sapiens |
| 51020  | HD domain containing 2                                                                                                                                                                                                                                                                                                                                                                                                                                                         | Homo sapiens |



|        |                                                                                       |              |
|--------|---------------------------------------------------------------------------------------|--------------|
| 79677  | structural maintenance of chromosomes 6                                               | Homo sapiens |
| 3098   | hexokinase 1                                                                          | Homo sapiens |
| 9533   | polymerase (RNA) I polypeptide C, 30kDa                                               | Homo sapiens |
| 51338  | membrane-spanning 4-domains, subfamily A, member 4                                    | Homo sapiens |
| 9378   | neurexin 1                                                                            | Homo sapiens |
| 55033  | FK506 binding protein 14, 22 kDa                                                      | Homo sapiens |
| 63027  | solute carrier family 22, member 23                                                   | Homo sapiens |
| 55127  | HEAT repeat containing 1                                                              | Homo sapiens |
| 57545  | coiled-coil and C2 domain containing 2A                                               | Homo sapiens |
| 54554  | WD repeat domain 5B                                                                   | Homo sapiens |
| 57645  | pogo transposable element with KRAB domain                                            | Homo sapiens |
| 4603   | v-myb myeloblastosis viral oncogene homolog (avian)-like 1                            | Homo sapiens |
| 2288   | FK506 binding protein 4, 59kDa                                                        | Homo sapiens |
| 27072  | vacuolar protein sorting 41 homolog (S. cerevisiae)                                   | Homo sapiens |
| 10241  | calcium binding and coiled-coil domain 2                                              | Homo sapiens |
| 4194   | Mdm4 p53 binding protein homolog (mouse)                                              | Homo sapiens |
| 10487  | CAP, adenylate cyclase-associated protein 1 (yeast)                                   | Homo sapiens |
| 148808 | major facilitator superfamily domain containing 4                                     | Homo sapiens |
| 26133  | transient receptor potential cation channel, subfamily C, member 4 associated protein | Homo sapiens |
| 56852  | RAD18 homolog (S. cerevisiae)                                                         | Homo sapiens |
| 84133  | zinc and ring finger 3                                                                | Homo sapiens |
| 114790 | serine/threonine kinase 11 interacting protein                                        | Homo sapiens |
| 8604   | solute carrier family 25 (mitochondrial carrier, Aralar), member 12                   | Homo sapiens |
| 23275  | protein O-fucosyltransferase 2                                                        | Homo sapiens |
| 54498  | spermine oxidase                                                                      | Homo sapiens |
| 24140  | FtsJ homolog 1 (E. coli)                                                              | Homo sapiens |
| 56252  | YLP motif containing 1                                                                | Homo sapiens |
| 1657   | Dmx-like 1                                                                            | Homo sapiens |
| 83931  | serine/threonine kinase 40                                                            | Homo sapiens |
| 4802   | nuclear transcription factor Y, gamma                                                 | Homo sapiens |
| 4839   | NOP2 nucleolar protein homolog (yeast)                                                | Homo sapiens |
| 11051  | nudix (nucleoside diphosphate linked moiety X)-type motif 21                          | Homo sapiens |
| 57216  | vang-like 2 (van gogh, Drosophila)                                                    | Homo sapiens |
| 57670  | KIAA1549                                                                              | Homo sapiens |
| 55023  | pleckstrin homology domain interacting protein                                        | Homo sapiens |
| 145957 | neuregulin 4                                                                          | Homo sapiens |
| 3660   | interferon regulatory factor 2                                                        | Homo sapiens |
| 116966 | WD repeat domain 17                                                                   | Homo sapiens |
| 339287 | male-specific lethal 1 homolog (Drosophila)                                           | Homo sapiens |
| 10758  | TRAF3 interacting protein 2                                                           | Homo sapiens |
| 5774   | protein tyrosine phosphatase, non-receptor type 3                                     | Homo sapiens |
| 64094  | SPARC related modular calcium binding 2                                               | Homo sapiens |
| 1497   | cystinosis, nephropathic                                                              | Homo sapiens |
| 375341 | chromosome 3 open reading frame 62                                                    | Homo sapiens |
| 84874  | zinc finger protein 514                                                               | Homo sapiens |
| 6747   | signal sequence receptor, gamma (translocon-associated protein gamma)                 | Homo sapiens |
| 201973 | coiled-coil domain containing 111                                                     | Homo sapiens |
| 1340   | cytochrome c oxidase subunit Vib polypeptide 1 (ubiquitous)                           | Homo sapiens |
| 6257   | retinoid X receptor, beta                                                             | Homo sapiens |
| 23163  | golgi associated, gamma adaptin ear containing, ARF binding protein 3                 | Homo sapiens |
| 56995  | tubby like protein 4                                                                  | Homo sapiens |
| 55353  | lysosomal protein transmembrane 4 beta                                                | Homo sapiens |
| 8874   | Rho guanine nucleotide exchange factor (GEF) 7                                        | Homo sapiens |
| 5756   | twinfilin, actin-binding protein, homolog 1 (Drosophila)                              | Homo sapiens |
| 84467  | fibrillin 3                                                                           | Homo sapiens |
| 23014  | F-box protein 21                                                                      | Homo sapiens |
| 5784   | protein tyrosine phosphatase, non-receptor type 14                                    | Homo sapiens |
| 4837   | nicotinamide N-methyltransferase                                                      | Homo sapiens |
| 51542  | vacuolar protein sorting 54 homolog (S. cerevisiae)                                   | Homo sapiens |
| 5621   | prion protein                                                                         | Homo sapiens |
| 9673   | solute carrier family 25, member 44                                                   | Homo sapiens |
| 10363  | high-mobility group 20A                                                               | Homo sapiens |
| 143686 | sestrin 3                                                                             | Homo sapiens |
| 7185   | TNF receptor-associated factor 1                                                      | Homo sapiens |
| 6167   | ribosomal protein L37                                                                 | Homo sapiens |
| 9406   | zinc finger, RAN-binding domain containing 2                                          | Homo sapiens |
| 653308 | N-acylsphingosine amidohydrolase (non-lysosomal ceramidase) 2B                        | Homo sapiens |
| 128077 | Lix1 homolog (mouse)-like                                                             | Homo sapiens |
| 84277  | DnaJ (Hsp40) homolog, subfamily C, member 30                                          | Homo sapiens |
| 4773   | nuclear factor of activated T-cells, cytoplasmic, calcineurin-dependent 2             | Homo sapiens |
| 7727   | zinc finger protein 174                                                               | Homo sapiens |
| 54960  | gem (nuclear organelle) associated protein 8                                          | Homo sapiens |
| 163    | adaptor-related protein complex 2, beta 1 subunit                                     | Homo sapiens |
| 9185   | RALBP1 associated Eps domain containing 2                                             | Homo sapiens |
| 145645 | chromosome 15 open reading frame 43                                                   | Homo sapiens |
| 7379   | uroplakin 2                                                                           | Homo sapiens |
| 5324   | pleiomorphic adenoma gene 1                                                           | Homo sapiens |
| 3010   | histone cluster 1, H1t                                                                | Homo sapiens |
| 7071   | Kruppel-like factor 10                                                                | Homo sapiens |

|           |                                                                                                                                                                                                      |              |
|-----------|------------------------------------------------------------------------------------------------------------------------------------------------------------------------------------------------------|--------------|
| 23008     | kelch domain containing 10                                                                                                                                                                           | Homo sapiens |
| 6218      | ribosomal protein S17                                                                                                                                                                                | Homo sapiens |
| 30008     | EGF-containing fibulin-like extracellular matrix protein 2                                                                                                                                           | Homo sapiens |
| 7531      | similar to 14-3-3 protein epsilon (14-3-3E) (Mitochondrial import stimulation factor L subunit) (MSF L); tyrosine 3-monooxygenase/tryptophan 5-monooxygenase activation protein, epsilon polypeptide | Homo sapiens |
| 440917    | similar to 14-3-3 protein epsilon (14-3-3E) (Mitochondrial import stimulation factor L subunit) (MSF L); tyrosine 3-monooxygenase/tryptophan 5-monooxygenase activation protein, epsilon polypeptide | Homo sapiens |
| 6236      | Ras-related associated with diabetes                                                                                                                                                                 | Homo sapiens |
| 8073      | protein tyrosine phosphatase type IVA, member 2                                                                                                                                                      | Homo sapiens |
| 11188     | nischarin                                                                                                                                                                                            | Homo sapiens |
| 1718      | 24-dehydrocholesterol reductase                                                                                                                                                                      | Homo sapiens |
| 3251      | hypoxanthine phosphoribosyltransferase 1                                                                                                                                                             | Homo sapiens |
| 64943     | 5'-nucleotidase domain containing 2                                                                                                                                                                  | Homo sapiens |
| 51444     | ring finger protein 138                                                                                                                                                                              | Homo sapiens |
| 51277     | DnaJ (Hsp40) homolog, subfamily C, member 27                                                                                                                                                         | Homo sapiens |
| 254778    | chromosome 8 open reading frame 46                                                                                                                                                                   | Homo sapiens |
| 64921     | CAS1 domain containing 1                                                                                                                                                                             | Homo sapiens |
| 25942     | SIN3 homolog A, transcription regulator (yeast)                                                                                                                                                      | Homo sapiens |
| 159013    | chromosome X open reading frame 38                                                                                                                                                                   | Homo sapiens |
| 57134     | mannosidase, alpha, class 1C, member 1                                                                                                                                                               | Homo sapiens |
| 3725      | jun oncogene                                                                                                                                                                                         | Homo sapiens |
| 6836      | surfeit 4                                                                                                                                                                                            | Homo sapiens |
| 27183     | vacuolar protein sorting 4 homolog A ( <i>S. cerevisiae</i> )                                                                                                                                        | Homo sapiens |
| 6645      | syntrophin, beta 2 (dystrophin-associated protein A1, 59kDa, basic component 2)                                                                                                                      | Homo sapiens |
| 85300     | ataxia, cerebellar, Cayman type                                                                                                                                                                      | Homo sapiens |
| 57589     | KIAA1432                                                                                                                                                                                             | Homo sapiens |
| 58473     | pleckstrin homology domain containing, family B (evectins) member 1                                                                                                                                  | Homo sapiens |
| 3164      | nuclear receptor subfamily 4, group A, member 1                                                                                                                                                      | Homo sapiens |
| 23048     | formin binding protein 1                                                                                                                                                                             | Homo sapiens |
| 79784     | myosin, heavy chain 14                                                                                                                                                                               | Homo sapiens |
| 140700    | sterile alpha motif domain containing 10                                                                                                                                                             | Homo sapiens |
| 3209      | homeobox A13                                                                                                                                                                                         | Homo sapiens |
| 5062      | p21 protein (Cdc42/Rac)-activated kinase 2                                                                                                                                                           | Homo sapiens |
| 7372      | uridine monophosphate synthetase                                                                                                                                                                     | Homo sapiens |
| 9827      | RGPI retrograde golgi transport homolog ( <i>S. cerevisiae</i> )                                                                                                                                     | Homo sapiens |
| 144983    | heterogeneous nuclear ribonucleoprotein A1-like 2                                                                                                                                                    | Homo sapiens |
| 7360      | UDP-glucose pyrophosphorylase 2                                                                                                                                                                      | Homo sapiens |
| 57532     | nuclear fragile X mental retardation protein interacting protein 2                                                                                                                                   | Homo sapiens |
| 5347      | polo-like kinase 1 ( <i>Drosophila</i> )                                                                                                                                                             | Homo sapiens |
| 25917     | THUMP domain containing 3                                                                                                                                                                            | Homo sapiens |
| 131583    | family with sequence similarity 43, member A                                                                                                                                                         | Homo sapiens |
| 359948    | interferon regulatory factor 2 binding protein 2                                                                                                                                                     | Homo sapiens |
| 114787    | G protein regulated inducer of neurite outgrowth 1                                                                                                                                                   | Homo sapiens |
| 1316      | Kruppel-like factor 6                                                                                                                                                                                | Homo sapiens |
| 51808     | phosphorylated adaptor for RNA export                                                                                                                                                                | Homo sapiens |
| 51619     | ubiquitin-conjugating enzyme E2D 4 (putative)                                                                                                                                                        | Homo sapiens |
| 6491      | SCL/TAL1 interrupting locus                                                                                                                                                                          | Homo sapiens |
| 5189      | peroxisomal biogenesis factor 1                                                                                                                                                                      | Homo sapiens |
| 51274     | Kruppel-like factor 3 (basic)                                                                                                                                                                        | Homo sapiens |
| 9521      | eukaryotic translation elongation factor 1 epsilon 1                                                                                                                                                 | Homo sapiens |
| 115361    | guanylate binding protein 4                                                                                                                                                                          | Homo sapiens |
| 219771    | cyclin Y                                                                                                                                                                                             | Homo sapiens |
| 10210     | topoisomerase I binding, arginine/serine-rich                                                                                                                                                        | Homo sapiens |
| 1478      | cleavage stimulation factor, 3' pre-RNA, subunit 2, 64kDa                                                                                                                                            | Homo sapiens |
| 2035      | erythrocyte membrane protein band 4.1 (elliptocytosis 1, RH-linked)                                                                                                                                  | Homo sapiens |
| 6193      | ribosomal protein S5                                                                                                                                                                                 | Homo sapiens |
| 644131    | similar to chaperonin containing TCP1, subunit 8 (theta); chaperonin containing TCP1, subunit 8 (theta)                                                                                              | Homo sapiens |
| 10694     | similar to chaperonin containing TCP1, subunit 8 (theta); chaperonin containing TCP1, subunit 8 (theta)                                                                                              | Homo sapiens |
| 220047    | coiled-coil domain containing 83                                                                                                                                                                     | Homo sapiens |
| 9918      | non-SMC condensin I complex, subunit D2                                                                                                                                                              | Homo sapiens |
| 100133770 | hypothetical protein LOC100133770; vacuolar protein sorting 35 homolog ( <i>S. cerevisiae</i> )                                                                                                      | Homo sapiens |
| 55737     | hypothetical protein LOC100133770; vacuolar protein sorting 35 homolog ( <i>S. cerevisiae</i> )                                                                                                      | Homo sapiens |
| 23047     | PDS5, regulator of cohesion maintenance, homolog B ( <i>S. cerevisiae</i> )                                                                                                                          | Homo sapiens |
| 64864     | regulatory factor X, 7                                                                                                                                                                               | Homo sapiens |
| 57597     | BAH domain and coiled-coil containing 1                                                                                                                                                              | Homo sapiens |
| 8091      | high mobility group AT-hook 2                                                                                                                                                                        | Homo sapiens |
| 5089      | pre-B-cell leukemia homeobox 2                                                                                                                                                                       | Homo sapiens |
| 7832      | BTG family, member 2                                                                                                                                                                                 | Homo sapiens |
| 439921    | matrix-remodelling associated 7                                                                                                                                                                      | Homo sapiens |
| 10970     | cytoskeleton-associated protein 4                                                                                                                                                                    | Homo sapiens |
| 8345      | histone cluster 1, H2bh                                                                                                                                                                              | Homo sapiens |
| 7316      | ubiquitin C                                                                                                                                                                                          | Homo sapiens |
| 4276      | MHC class I polypeptide-related sequence A                                                                                                                                                           | Homo sapiens |
| 116068    | LysM, putative peptidoglycan-binding, domain containing 3                                                                                                                                            | Homo sapiens |
| 157       | adrenergic, beta, receptor kinase 2                                                                                                                                                                  | Homo sapiens |

|        |                                                                                               |              |
|--------|-----------------------------------------------------------------------------------------------|--------------|
| 28996  | homeodomain interacting protein kinase 2; similar to homeodomain interacting protein kinase 2 | Homo sapiens |
| 653052 | homeodomain interacting protein kinase 2; similar to homeodomain interacting protein kinase 2 | Homo sapiens |
| 3838   | karyopherin alpha 2 (RAG cohort 1, importin alpha 1); karyopherin alpha-2 subunit like        | Homo sapiens |
| 728860 | karyopherin alpha 2 (RAG cohort 1, importin alpha 1); karyopherin alpha-2 subunit like        | Homo sapiens |
| 10444  | zer-1 homolog (C. elegans)                                                                    | Homo sapiens |
| 54855  | family with sequence similarity 46, member C                                                  | Homo sapiens |
| 8458   | transcription termination factor, RNA polymerase II                                           | Homo sapiens |
| 2353   | v-fos FBJ murine osteosarcoma viral oncogene homolog                                          | Homo sapiens |
| 137886 | UBX domain protein 2B                                                                         | Homo sapiens |
| 6405   | sema domain, immunoglobulin domain (Ig), short basic domain, secreted, (semaphorin) 3F        | Homo sapiens |
| 334    | amyloid beta (A4) precursor-like protein 2                                                    | Homo sapiens |
| 9529   | BCL2-associated athanogene 5                                                                  | Homo sapiens |
| 23413  | frequenin homolog (Drosophila)                                                                | Homo sapiens |
| 3987   | LIM and senescent cell antigen-like domains 1                                                 | Homo sapiens |
| 23491  | carboxylesterase 3                                                                            | Homo sapiens |
| 54407  | solute carrier family 38, member 2                                                            | Homo sapiens |
| 7423   | vascular endothelial growth factor B                                                          | Homo sapiens |
| 55677  | IWS1 homolog (S. cerevisiae)                                                                  | Homo sapiens |
| 8834   | transmembrane protein 11                                                                      | Homo sapiens |
| 23130  | ATG2 autophagy related 2 homolog A (S. cerevisiae)                                            | Homo sapiens |
| 51729  | WW domain binding protein 11                                                                  | Homo sapiens |
| 5499   | protein phosphatase 1, catalytic subunit, alpha isoform                                       | Homo sapiens |
| 5529   | protein phosphatase 2, regulatory subunit B', epsilon isoform                                 | Homo sapiens |
| 10682  | emopamil binding protein (sterol isomerase)                                                   | Homo sapiens |
| 7416   | voltage-dependent anion channel 1; similar to voltage-dependent anion channel 1               | Homo sapiens |
| 642585 | voltage-dependent anion channel 1; similar to voltage-dependent anion channel 1               | Homo sapiens |
| 5143   | phosphodiesterase 4C, cAMP-specific (phosphodiesterase E1 dunce homolog, Drosophila)          | Homo sapiens |
| 8986   | ribosomal protein S6 kinase, 90kDa, polypeptide 4                                             | Homo sapiens |
| 8148   | TAF15 RNA polymerase II, TATA box binding protein (TBP)-associated factor, 68kDa              | Homo sapiens |
| 51068  | NMD3 homolog (S. cerevisiae)                                                                  | Homo sapiens |
| 57018  | cyclin L1                                                                                     | Homo sapiens |
| 8878   | sequestosome 1                                                                                | Homo sapiens |
| 85365  | asparagine-linked glycosylation 2, alpha-1,3-mannosyltransferase homolog (S. cerevisiae)      | Homo sapiens |
| 256987 | serine incorporator 5                                                                         | Homo sapiens |
| 284001 | coiled-coil domain containing 57                                                              | Homo sapiens |
| 51164  | dynactin 4 (p62)                                                                              | Homo sapiens |
| 81565  | nudE nuclear distribution gene E homolog (A. nidulans)-like 1                                 | Homo sapiens |
| 51013  | exosome component 1                                                                           | Homo sapiens |
| 128553 | teashirt zinc finger homeobox 2                                                               | Homo sapiens |
| 85465  | selenoprotein I                                                                               | Homo sapiens |
| 10480  | eukaryotic translation initiation factor 3, subunit M                                         | Homo sapiens |
| 3619   | inner centromere protein antigens 135/155kDa                                                  | Homo sapiens |
| 60496  | aminoadipate-semialdehyde dehydrogenase-phosphopantetheinyl transferase                       | Homo sapiens |
| 8029   | cubilin (intrinsic factor-cobalamin receptor)                                                 | Homo sapiens |
| 2648   | K(lysine) acetyltransferase 2A                                                                | Homo sapiens |
| 79571  | GRIP and coiled-coil domain containing 1                                                      | Homo sapiens |
| 9221   | nucleolar and coiled-body phosphoprotein 1                                                    | Homo sapiens |
| 10971  | tyrosine 3-monooxygenase/tryptophan 5-monooxygenase activation protein, theta polypeptide     | Homo sapiens |
| 1021   | cyclin-dependent kinase 6                                                                     | Homo sapiens |
| 346007 | eyes shut homolog (Drosophila)                                                                | Homo sapiens |
| 9986   | RCE1 homolog, prenyl protein peptidase (S. cerevisiae)                                        | Homo sapiens |
| 23245  | astrotactin 2                                                                                 | Homo sapiens |
| 402    | ADP-ribosylation factor-like 2                                                                | Homo sapiens |
| 6474   | short stature homeobox 2                                                                      | Homo sapiens |
| 400793 | chromosome 1 open reading frame 226                                                           | Homo sapiens |
| 201626 | phosphodiesterase 12                                                                          | Homo sapiens |
| 9517   | serine palmitoyltransferase, long chain base subunit 2                                        | Homo sapiens |
| 538    | ATPase, Cu <sup>++</sup> transporting, alpha polypeptide                                      | Homo sapiens |
| 2195   | FAT tumor suppressor homolog 1 (Drosophila)                                                   | Homo sapiens |
| 84733  | chromobox homolog 2 (Pc class homolog, Drosophila)                                            | Homo sapiens |
| 151    | adrenergic, alpha-2B-, receptor                                                               | Homo sapiens |
| 164832 | LON peptidase N-terminal domain and ring finger 2                                             | Homo sapiens |
| 23023  | transmembrane and coiled-coil domain family 1                                                 | Homo sapiens |
| 10675  | chondroitin sulfate proteoglycan 5 (neuroglycan C)                                            | Homo sapiens |
| 7753   | zinc finger protein 202                                                                       | Homo sapiens |
| 2100   | estrogen receptor 2 (ER beta)                                                                 | Homo sapiens |
| 2526   | fucosyltransferase 4 (alpha (1,3) fucosyltransferase, myeloid-specific)                       | Homo sapiens |
| 23401  | frequently rearranged in advanced T-cell lymphomas 2                                          | Homo sapiens |
| 3185   | heterogeneous nuclear ribonucleoprotein F                                                     | Homo sapiens |
| 5860   | quinoid dihydropteridine reductase                                                            | Homo sapiens |
| 2965   | general transcription factor IIH, polypeptide 1, 62kDa                                        | Homo sapiens |
| 1729   | diaphanous homolog 1 (Drosophila)                                                             | Homo sapiens |
| 23114  | neurofascin homolog (chicken)                                                                 | Homo sapiens |
| 140459 | ankyrin repeat and SOCS box-containing 6                                                      | Homo sapiens |
| 5538   | palmitoyl-protein thioesterase 1                                                              | Homo sapiens |
| 79673  | zinc finger protein 329                                                                       | Homo sapiens |

|        |                                                                                         |              |
|--------|-----------------------------------------------------------------------------------------|--------------|
| 4646   | myosin VI                                                                               | Homo sapiens |
| 682    | basigin (Ok blood group)                                                                | Homo sapiens |
| 3691   | integrin, beta 4                                                                        | Homo sapiens |
| 51     | acyl-Coenzyme A oxidase 1, palmitoyl                                                    | Homo sapiens |
| 166968 | mesoderm induction early response 1, family member 3                                    | Homo sapiens |
| 2104   | estrogen-related receptor gamma                                                         | Homo sapiens |
| 84163  | GTF2I repeat domain containing 2                                                        | Homo sapiens |
| 9440   | mediator complex subunit 17                                                             | Homo sapiens |
| 23354  | HAUS augmin-like complex, subunit 5                                                     | Homo sapiens |
| 9618   | TNF receptor-associated factor 4                                                        | Homo sapiens |
| 4354   | membrane protein, palmitoylated 1, 55kDa                                                | Homo sapiens |
| 121296 | transmembrane protein 132B; hypothetical LOC121296                                      | Homo sapiens |
| 114795 | transmembrane protein 132B; hypothetical LOC121296                                      | Homo sapiens |
| 55508  | solute carrier family 35, member E3                                                     | Homo sapiens |
| 26249  | kelch-like 3 (Drosophila)                                                               | Homo sapiens |
| 54949  | chromosome 11 open reading frame 79                                                     | Homo sapiens |
| 1594   | cytochrome P450, family 27, subfamily B, polypeptide 1                                  | Homo sapiens |
| 8935   | src kinase associated phosphoprotein 2                                                  | Homo sapiens |
| 11122  | protein tyrosine phosphatase, receptor type, T                                          | Homo sapiens |
| 55847  | CDGSH iron sulfur domain 1                                                              | Homo sapiens |
| 5445   | paraoxonase 2                                                                           | Homo sapiens |
| 81847  | ring finger protein 146                                                                 | Homo sapiens |
| 729708 | TPI1 pseudogene; triosephosphate isomerase 1                                            | Homo sapiens |
| 7167   | TPI1 pseudogene; triosephosphate isomerase 1                                            | Homo sapiens |
| 85461  | tetratricopeptide repeat, ankyrin repeat and coiled-coil containing 1                   | Homo sapiens |
| 51629  | solute carrier family 25, member 39                                                     | Homo sapiens |
| 84924  | zinc finger protein 566                                                                 | Homo sapiens |
| 7286   | tuftelin 1                                                                              | Homo sapiens |
| 137075 | claudin 23                                                                              | Homo sapiens |
| 54845  | epithelial splicing regulatory protein 1                                                | Homo sapiens |
| 2768   | guanine nucleotide binding protein (G protein) alpha 12                                 | Homo sapiens |
| 22978  | 5'-nucleotidase, cytosolic II                                                           | Homo sapiens |
| 2166   | fatty acid amide hydrolase                                                              | Homo sapiens |
| 127933 | U2AF homology motif (UHM) kinase 1                                                      | Homo sapiens |
| 523    | ATPase, H <sup>+</sup> transporting, lysosomal 70kDa, V1 subunit A                      | Homo sapiens |
| 8723   | sorting nexin 4                                                                         | Homo sapiens |
| 5792   | protein tyrosine phosphatase, receptor type, F                                          | Homo sapiens |
| 63924  | cell death-inducing DFFA-like effector c                                                | Homo sapiens |
| 3714   | jagged 2                                                                                | Homo sapiens |
| 51116  | mitochondrial ribosomal protein S2                                                      | Homo sapiens |
| 4811   | nidogen 1                                                                               | Homo sapiens |
| 54834  | ganglioside induced differentiation associated protein 2                                | Homo sapiens |
| 85464  | slingshot homolog 2 (Drosophila)                                                        | Homo sapiens |
| 11149  | blood vessel epicardial substance                                                       | Homo sapiens |
| 1207   | chloride channel, nucleotide-sensitive, 1A                                              | Homo sapiens |
| 9768   | KIAA0101                                                                                | Homo sapiens |
| 80012  | polyhomeotic homolog 3 (Drosophila)                                                     | Homo sapiens |
| 84250  | ankyrin repeat domain 32                                                                | Homo sapiens |
| 83660  | talin 2                                                                                 | Homo sapiens |
| 5037   | phosphatidylethanolamine binding protein 1                                              | Homo sapiens |
| 153830 | ring finger protein 145                                                                 | Homo sapiens |
| 56052  | asparagine-linked glycosylation 1, beta-1,4-mannosyltransferase homolog (S. cerevisiae) | Homo sapiens |
| 27018  | nerve growth factor receptor (TNFRSF16) associated protein 1                            | Homo sapiens |
| 115019 | solute carrier family 26, member 9                                                      | Homo sapiens |
| 8824   | carboxylesterase 2 (intestine, liver)                                                   | Homo sapiens |
| 4542   | myosin IF                                                                               | Homo sapiens |
| 55089  | solute carrier family 38, member 4                                                      | Homo sapiens |
| 790955 | chromosome 11 open reading frame 83                                                     | Homo sapiens |
| 342909 | zinc finger protein 284                                                                 | Homo sapiens |
| 27242  | tumor necrosis factor receptor superfamily, member 21                                   | Homo sapiens |
| 54765  | tripartite motif-containing 44                                                          | Homo sapiens |
| 115509 | zinc finger protein 689                                                                 | Homo sapiens |
| 23294  | ankyrin repeat and sterile alpha motif domain containing 1A                             | Homo sapiens |
| 10491  | cartilage associated protein                                                            | Homo sapiens |
| 285704 | RGM domain family, member B                                                             | Homo sapiens |
| 56888  | potassium channel modulatory factor 1                                                   | Homo sapiens |
| 774    | calcium channel, voltage-dependent, N type, alpha 1B subunit                            | Homo sapiens |
| 6497   | v-ski sarcoma viral oncogene homolog (avian)                                            | Homo sapiens |
| 51605  | tRNA methyltransferase 6 homolog (S. cerevisiae)                                        | Homo sapiens |
| 55765  | chromosome 1 open reading frame 106                                                     | Homo sapiens |
| 7690   | zinc finger protein 131                                                                 | Homo sapiens |
| 10419  | protein arginine methyltransferase 5                                                    | Homo sapiens |
| 4261   | class II, major histocompatibility complex, transactivator                              | Homo sapiens |
| 3911   | laminin, alpha 5                                                                        | Homo sapiens |
| 4170   | myeloid cell leukemia sequence 1 (BCL2-related)                                         | Homo sapiens |
| 9655   | suppressor of cytokine signaling 5                                                      | Homo sapiens |
| 91147  | transmembrane protein 67                                                                | Homo sapiens |
| 1639   | dynactin 1 (p150, glued homolog, Drosophila)                                            | Homo sapiens |
| 533    | ATPase, H <sup>+</sup> transporting, lysosomal 21kDa, V0 subunit b                      | Homo sapiens |

|           |                                                                                                |              |
|-----------|------------------------------------------------------------------------------------------------|--------------|
| 5355      | proteolipid protein 2 (colonic epithelium-enriched)                                            | Homo sapiens |
| 554250    | growth differentiation factor 5 opposite strand                                                | Homo sapiens |
| 66036     | myotubularin related protein 9                                                                 | Homo sapiens |
| 2033      | E1A binding protein p300                                                                       | Homo sapiens |
| 78992     | Yipl domain family, member 2                                                                   | Homo sapiens |
| 345274    | solute carrier family 10 (sodium/bile acid cotransporter family), member 6                     | Homo sapiens |
| 10284     | Sin3A-associated protein, 18kDa                                                                | Homo sapiens |
| 117608    | zinc finger protein 354B                                                                       | Homo sapiens |
| 489       | ATPase, Ca <sup>++</sup> transporting, ubiquitous                                              | Homo sapiens |
| 6787      | NIMA (never in mitosis gene a)-related kinase 4                                                | Homo sapiens |
| 23059     | clusterin associated protein 1                                                                 | Homo sapiens |
| 10640     | exocyst complex component 5                                                                    | Homo sapiens |
| 131405    | tripartite motif-containing 71                                                                 | Homo sapiens |
| 3177      | solute carrier family 29 (nucleoside transporters), member 2                                   | Homo sapiens |
| 11027     | leukocyte immunoglobulin-like receptor, subfamily A (with TM domain), member 2                 | Homo sapiens |
| 10946     | splicing factor 3a, subunit 3, 60kDa                                                           | Homo sapiens |
| 23152     | capicua homolog (Drosophila)                                                                   | Homo sapiens |
| 80139     | zinc finger protein 703                                                                        | Homo sapiens |
| 152485    | zinc finger protein 827                                                                        | Homo sapiens |
| 10514     | MYB binding protein (P160) 1a                                                                  | Homo sapiens |
| 91875     | tetratricopeptide repeat domain 5                                                              | Homo sapiens |
| 284390    | zinc finger protein 763                                                                        | Homo sapiens |
| 2639      | glutaryl-Coenzyme A dehydrogenase                                                              | Homo sapiens |
| 10295     | branched chain ketoacid dehydrogenase kinase                                                   | Homo sapiens |
| 25805     | hypothetical LOC729590; BMP and activin membrane-bound inhibitor homolog (Xenopus laevis)      | Homo sapiens |
| 729590    | hypothetical LOC729590; BMP and activin membrane-bound inhibitor homolog (Xenopus laevis)      | Homo sapiens |
| 92935     | methionyl-tRNA synthetase 2, mitochondrial                                                     | Homo sapiens |
| 79646     | pantothenate kinase 3                                                                          | Homo sapiens |
| 284685    | similar to Ewing sarcoma breakpoint region 1; Ewing sarcoma breakpoint region 1                | Homo sapiens |
| 2130      | similar to Ewing sarcoma breakpoint region 1; Ewing sarcoma breakpoint region 1                | Homo sapiens |
| 2800      | golgi autoantigen, golgin subfamily a, 1                                                       | Homo sapiens |
| 167227    | DCP2 decapping enzyme homolog (S. cerevisiae)                                                  | Homo sapiens |
| 10385     | butyrophilin, subfamily 2, member A2                                                           | Homo sapiens |
| 55082     | arginine and glutamate rich 1                                                                  | Homo sapiens |
| 29842     | transcription factor CP2-like 1                                                                | Homo sapiens |
| 2635      | guanylate binding protein 3                                                                    | Homo sapiens |
| 285598    | ADP-ribosylation factor-like 10                                                                | Homo sapiens |
| 5822      | PWP2 periodic tryptophan protein homolog (yeast)                                               | Homo sapiens |
| 10949     | heterogeneous nuclear ribonucleoprotein A0                                                     | Homo sapiens |
| 4753      | NEL-like 2 (chicken)                                                                           | Homo sapiens |
| 1069      | centrin, EF-hand protein, 2                                                                    | Homo sapiens |
| 270       | adenosine monophosphate deaminase 1 (isoform M)                                                | Homo sapiens |
| 100128526 | hypothetical LOC100128526; target of myb1 (chicken)                                            | Homo sapiens |
| 10043     | hypothetical LOC100128526; target of myb1 (chicken)                                            | Homo sapiens |
| 9709      | homocysteine-inducible, endoplasmic reticulum stress-inducible, ubiquitin-like domain member 1 | Homo sapiens |
| 90204     | zinc finger, SWIM-type containing 1                                                            | Homo sapiens |
| 201191    | sterile alpha motif domain containing 14                                                       | Homo sapiens |
| 81610     | family with sequence similarity 83, member D                                                   | Homo sapiens |
| 2553      | GA binding protein transcription factor, beta subunit 1                                        | Homo sapiens |
| 345778    | metaxin 3                                                                                      | Homo sapiens |
| 94032     | calcium/calmodulin-dependent protein kinase II inhibitor 2                                     | Homo sapiens |
| 90407     | transmembrane protein 41A                                                                      | Homo sapiens |
| 25959     | KN motif and ankyrin repeat domains 2                                                          | Homo sapiens |
| 346157    | zinc finger protein 391                                                                        | Homo sapiens |
| 51148     | cerebral endothelial cell adhesion molecule                                                    | Homo sapiens |
| 8661      | eukaryotic translation initiation factor 3, subunit A                                          | Homo sapiens |
| 529       | ATPase, H <sup>+</sup> transporting, lysosomal 31kDa, V1 subunit E1                            | Homo sapiens |
| 5768      | quiescin Q6 sulfhydryl oxidase 1                                                               | Homo sapiens |
| 7403      | lysine (K)-specific demethylase 6A                                                             | Homo sapiens |
| 23200     | ATPase, class VI, type 11B                                                                     | Homo sapiens |
| 55145     | THAP domain containing, apoptosis associated protein 1                                         | Homo sapiens |
| 2043      | EPH receptor A4                                                                                | Homo sapiens |
| 4664      | NGFI-A binding protein 1 (EGR1 binding protein 1)                                              | Homo sapiens |
| 3419      | isocitrate dehydrogenase 3 (NAD <sup>+</sup> ) alpha                                           | Homo sapiens |
| 283373    | ankyrin repeat domain 52                                                                       | Homo sapiens |
| 84301     | DDI1, DNA-damage inducible 1, homolog 2 (S. cerevisiae)                                        | Homo sapiens |
| 206358    | solute carrier family 36 (proton/amino acid symporter), member 1                               | Homo sapiens |
| 27254     | cold shock domain containing C2, RNA binding                                                   | Homo sapiens |
| 26227     | phosphoglycerate dehydrogenase                                                                 | Homo sapiens |
| 5036      | proliferation-associated 2G4, 38kDa; proliferation-associated 2G4 pseudogene 4                 | Homo sapiens |
| 647033    | proliferation-associated 2G4, 38kDa; proliferation-associated 2G4 pseudogene 4                 | Homo sapiens |
| 1555      | cytochrome P450, family 2, subfamily B, polypeptide 6                                          | Homo sapiens |
| 7259      | TSPY-like 1                                                                                    | Homo sapiens |
| 51058     | zinc finger protein 691                                                                        | Homo sapiens |
| 6720      | sterol regulatory element binding transcription factor 1                                       | Homo sapiens |
| 80003     | pecanex-like 2 (Drosophila)                                                                    | Homo sapiens |

|           |                                                                                                                                     |              |
|-----------|-------------------------------------------------------------------------------------------------------------------------------------|--------------|
| 6668      | Sp2 transcription factor                                                                                                            | Homo sapiens |
| 285237    | chromosome 3 open reading frame 38                                                                                                  | Homo sapiens |
| 10728     | prostaglandin E synthase 3 (cytosolic)                                                                                              | Homo sapiens |
| 9637      | fasciculation and elongation protein zeta 2 (zygin II)                                                                              | Homo sapiens |
| 151449    | growth differentiation factor 7                                                                                                     | Homo sapiens |
| 7045      | transforming growth factor, beta-induced, 68kDa                                                                                     | Homo sapiens |
| 220992    | zinc finger protein 485                                                                                                             | Homo sapiens |
| 9894      | TEL2, telomere maintenance 2, homolog (S. cerevisiae)                                                                               | Homo sapiens |
| 157927    | chromosome 9 open reading frame 62                                                                                                  | Homo sapiens |
| 84276     | nicolin 1                                                                                                                           | Homo sapiens |
| 257194    | neuronal growth regulator 1                                                                                                         | Homo sapiens |
| 84280     | BTB (POZ) domain containing 10                                                                                                      | Homo sapiens |
| 23118     | mitogen-activated protein kinase kinase kinase 7 interacting protein 2                                                              | Homo sapiens |
| 57465     | TBC1 domain family, member 24                                                                                                       | Homo sapiens |
| 6301      | seryl-tRNA synthetase                                                                                                               | Homo sapiens |
| 124491    | transmembrane protein 170A                                                                                                          | Homo sapiens |
| 22794     | cancer susceptibility candidate 3                                                                                                   | Homo sapiens |
| 3400      | inhibitor of DNA binding 4, dominant negative helix-loop-helix protein                                                              | Homo sapiens |
| 92591     | ankyrin repeat and SOCS box-containing 16                                                                                           | Homo sapiens |
| 959       | CD40 ligand                                                                                                                         | Homo sapiens |
| 2617      | glycyl-tRNA synthetase                                                                                                              | Homo sapiens |
| 29993     | protein kinase C and casein kinase substrate in neurons 1                                                                           | Homo sapiens |
| 56929     | fem-1 homolog c (C. elegans)                                                                                                        | Homo sapiens |
| 730031    | similar to Afadin (Protein AF-6); myeloid/lymphoid or mixed-lineage leukemia (trithorax homolog, Drosophila); translocated to, 4    | Homo sapiens |
| 4301      | similar to Afadin (Protein AF-6); myeloid/lymphoid or mixed-lineage leukemia (trithorax homolog, Drosophila); translocated to, 4    | Homo sapiens |
| 6164      | ribosomal protein L34                                                                                                               | Homo sapiens |
| 51490     | chromosome 9 open reading frame 114                                                                                                 | Homo sapiens |
| 4436      | mutS homolog 2, colon cancer, nonpolyposis type 1 (E. coli)                                                                         | Homo sapiens |
| 134728    | interleukin-1 receptor-associated kinase 1 binding protein 1                                                                        | Homo sapiens |
| 6666      | SRY (sex determining region Y)-box 12                                                                                               | Homo sapiens |
| 23155     | chloride channel CLIC-like 1                                                                                                        | Homo sapiens |
| 2316      | filamin A, alpha (actin binding protein 280)                                                                                        | Homo sapiens |
| 1983      | eukaryotic translation initiation factor 5                                                                                          | Homo sapiens |
| 3796      | kinesin heavy chain member 2A                                                                                                       | Homo sapiens |
| 389799    | chromosome 9 open reading frame 171                                                                                                 | Homo sapiens |
| 54940     | OCIA domain containing 1                                                                                                            | Homo sapiens |
| 64386     | matrix metalloproteinase 25                                                                                                         | Homo sapiens |
| 79443     | FYVE and coiled-coil domain containing 1                                                                                            | Homo sapiens |
| 64393     | zinc finger, matrin type 3                                                                                                          | Homo sapiens |
| 462       | serpin peptidase inhibitor, clade C (antithrombin), member 1                                                                        | Homo sapiens |
| 84272     | Yipl domain family, member 4                                                                                                        | Homo sapiens |
| 27086     | forkhead box P1                                                                                                                     | Homo sapiens |
| 55095     | sterile alpha motif domain containing 4B                                                                                            | Homo sapiens |
| 139886    | spindlin family, member 4                                                                                                           | Homo sapiens |
| 154796    | angiominin                                                                                                                          | Homo sapiens |
| 26018     | leucine-rich repeats and immunoglobulin-like domains 1                                                                              | Homo sapiens |
| 4641      | myosin IC                                                                                                                           | Homo sapiens |
| 55066     | pyruvate dehydrogenase phosphatase regulatory subunit                                                                               | Homo sapiens |
| 2894      | glutamate receptor, ionotropic, delta 1                                                                                             | Homo sapiens |
| 81493     | syncoilin, intermediate filament protein                                                                                            | Homo sapiens |
| 7291      | twist homolog 1 (Drosophila)                                                                                                        | Homo sapiens |
| 1847      | dual specificity phosphatase 5                                                                                                      | Homo sapiens |
| 80254     | centrosomal protein 63kDa                                                                                                           | Homo sapiens |
| 55870     | ash1 (absent, small, or homeotic)-like (Drosophila)                                                                                 | Homo sapiens |
| 7763      | similar to zinc finger, AN1-type domain 5; zinc finger, AN1-type domain 5                                                           | Homo sapiens |
| 732229    | similar to zinc finger, AN1-type domain 5; zinc finger, AN1-type domain 5                                                           | Homo sapiens |
| 79660     | protein phosphatase 1, regulatory (inhibitor) subunit 3B                                                                            | Homo sapiens |
| 147495    | adenomatous polyposis coli down-regulated 1                                                                                         | Homo sapiens |
| 285172    | family with sequence similarity 126, member B                                                                                       | Homo sapiens |
| 830       | capping protein (actin filament) muscle Z-line, alpha 2                                                                             | Homo sapiens |
| 4084      | MAX dimerization protein 1                                                                                                          | Homo sapiens |
| 26521     | similar to translocase of inner mitochondrial membrane 8 homolog B; translocase of inner mitochondrial membrane 8 homolog B (yeast) | Homo sapiens |
| 100131128 | similar to translocase of inner mitochondrial membrane 8 homolog B; translocase of inner mitochondrial membrane 8 homolog B (yeast) | Homo sapiens |
| 647302    | LSM3 homolog, U6 small nuclear RNA associated (S. cerevisiae); similar to Lsm3 protein                                              | Homo sapiens |
| 27258     | LSM3 homolog, U6 small nuclear RNA associated (S. cerevisiae); similar to Lsm3 protein                                              | Homo sapiens |
| 121214    | short chain dehydrogenase/reductase family 9C, member 7                                                                             | Homo sapiens |
| 138009    | WD repeat domain 21C                                                                                                                | Homo sapiens |
| 7275      | tubby homolog (mouse)                                                                                                               | Homo sapiens |
| 10622     | polymerase (RNA) III (DNA directed) polypeptide G (32kD)                                                                            | Homo sapiens |
| 5906      | RAP1A, member of RAS oncogene family                                                                                                | Homo sapiens |
| 51167     | cytochrome b5 reductase 4                                                                                                           | Homo sapiens |
| 92181     | ubiquitin domain containing 2                                                                                                       | Homo sapiens |
| 1362      | carboxypeptidase D                                                                                                                  | Homo sapiens |
| 64111     | neuropeptide VF precursor                                                                                                           | Homo sapiens |
| 153642    | arylsulfatase family, member K                                                                                                      | Homo sapiens |

|        |                                                                                                                                                    |              |
|--------|----------------------------------------------------------------------------------------------------------------------------------------------------|--------------|
| 54495  | thioredoxin-related transmembrane protein 3                                                                                                        | Homo sapiens |
| 23583  | single-strand-selective monofunctional uracil-DNA glycosylase 1                                                                                    | Homo sapiens |
| 10152  | abl interactor 2                                                                                                                                   | Homo sapiens |
| 29071  | CIGALT1-specific chaperone 1                                                                                                                       | Homo sapiens |
| 23516  | solute carrier family 39 (zinc transporter), member 14                                                                                             | Homo sapiens |
| 23397  | non-SMC condensin I complex, subunit H                                                                                                             | Homo sapiens |
| 7707   | zinc finger protein 148                                                                                                                            | Homo sapiens |
| 9712   | USP6 N-terminal like                                                                                                                               | Homo sapiens |
| 51780  | lysine (K)-specific demethylase 3B                                                                                                                 | Homo sapiens |
| 4613   | v-myc myelocytomatosis viral related oncogene, neuroblastoma derived (avian)                                                                       | Homo sapiens |
| 92912  | ubiquitin-conjugating enzyme E2Q family member 2                                                                                                   | Homo sapiens |
| 2098   | esterase D/formylglutathione hydrolase                                                                                                             | Homo sapiens |
| 115196 | zinc finger protein 554                                                                                                                            | Homo sapiens |
| 5307   | paired-like homeodomain 1                                                                                                                          | Homo sapiens |
| 8669   | eukaryotic translation initiation factor 3, subunit J                                                                                              | Homo sapiens |
| 23042  | pyridoxal-dependent decarboxylase domain containing 1                                                                                              | Homo sapiens |
| 10960  | lectin, mannose-binding 2                                                                                                                          | Homo sapiens |
| 8566   | pyridoxal (pyridoxine, vitamin B6) kinase                                                                                                          | Homo sapiens |
| 57504  | metastasis associated 1 family, member 3                                                                                                           | Homo sapiens |
| 6202   | ribosomal protein S8; ribosomal protein S8 pseudogene 8; ribosomal protein S8 pseudogene 10                                                        | Homo sapiens |
| 728553 | ribosomal protein S8; ribosomal protein S8 pseudogene 8; ribosomal protein S8 pseudogene 10                                                        | Homo sapiens |
| 388076 | ribosomal protein S8; ribosomal protein S8 pseudogene 8; ribosomal protein S8 pseudogene 10                                                        | Homo sapiens |
| 3166   | H6 family homeobox 1                                                                                                                               | Homo sapiens |
| 7552   | zinc finger protein 711                                                                                                                            | Homo sapiens |
| 114327 | EF-hand domain (C-terminal) containing 1                                                                                                           | Homo sapiens |
| 2896   | granulin                                                                                                                                           | Homo sapiens |
| 83640  | family with sequence similarity 103, member A1                                                                                                     | Homo sapiens |
| 10513  | amyloid beta precursor protein (cytoplasmic tail) binding protein 2                                                                                | Homo sapiens |
| 57492  | AT rich interactive domain 1B (SWI1-like)                                                                                                          | Homo sapiens |
| 54107  | polymerase (DNA directed), epsilon 3 (p17 subunit)                                                                                                 | Homo sapiens |
| 441478 | NOTCH-regulated ankyrin repeat protein                                                                                                             | Homo sapiens |
| 6839   | suppressor of variegation 3-9 homolog 1 (Drosophila)                                                                                               | Homo sapiens |
| 56648  | eukaryotic translation initiation factor 5A2                                                                                                       | Homo sapiens |
| 23332  | cytoplasmic linker associated protein 1                                                                                                            | Homo sapiens |
| 27304  | molybdenum cofactor synthesis 3                                                                                                                    | Homo sapiens |
| 29994  | bromodomain adjacent to zinc finger domain, 2B                                                                                                     | Homo sapiens |
| 126282 | tumor necrosis factor, alpha-induced protein 8-like 1                                                                                              | Homo sapiens |
| 284353 | NTPase, KAP family P-loop domain containing 1                                                                                                      | Homo sapiens |
| 5983   | replication factor C (activator 1) 3, 38kDa                                                                                                        | Homo sapiens |
| 5094   | poly(rC) binding protein 2                                                                                                                         | Homo sapiens |
| 283337 | zinc finger protein 740                                                                                                                            | Homo sapiens |
| 222235 | F-box and leucine-rich repeat protein 13                                                                                                           | Homo sapiens |
| 4288   | antigen identified by monoclonal antibody Ki-67                                                                                                    | Homo sapiens |
| 403341 | zinc finger and BTB domain containing 34                                                                                                           | Homo sapiens |
| 4234   | methyltransferase like 1                                                                                                                           | Homo sapiens |
| 6146   | ribosomal protein L22 pseudogene 11; ribosomal protein L22                                                                                         | Homo sapiens |
| 402100 | ribosomal protein L22 pseudogene 11; ribosomal protein L22                                                                                         | Homo sapiens |
| 338707 | beta-1,4-N-acetyl-galactosaminyl transferase 4                                                                                                     | Homo sapiens |
| 23217  | zinc finger RNA binding protein 2                                                                                                                  | Homo sapiens |
| 83607  | AMME chromosomal region gene 1-like                                                                                                                | Homo sapiens |
| 7159   | tumor protein p53 binding protein, 2                                                                                                               | Homo sapiens |
| 10226  | mannose-6-phosphate receptor binding protein 1                                                                                                     | Homo sapiens |
| 23160  | WD repeat domain 43                                                                                                                                | Homo sapiens |
| 9154   | solute carrier family 28 (sodium-coupled nucleoside transporter), member 1                                                                         | Homo sapiens |
| 57476  | GRAM domain containing 1B                                                                                                                          | Homo sapiens |
| 84296  | GINS complex subunit 4 (Sld5 homolog)                                                                                                              | Homo sapiens |
| 23108  | GTPase activating Rap/RanGAP domain-like 4                                                                                                         | Homo sapiens |
| 85319  | B melanoma antigen family, member 2; B melanoma antigen family, member 3; B melanoma antigen family, member 4; B melanoma antigen family, member 5 | Homo sapiens |
| 85316  | B melanoma antigen family, member 2; B melanoma antigen family, member 3; B melanoma antigen family, member 4; B melanoma antigen family, member 5 | Homo sapiens |
| 85318  | B melanoma antigen family, member 2; B melanoma antigen family, member 3; B melanoma antigen family, member 4; B melanoma antigen family, member 5 | Homo sapiens |
| 85317  | B melanoma antigen family, member 2; B melanoma antigen family, member 3; B melanoma antigen family, member 4; B melanoma antigen family, member 5 | Homo sapiens |
| 29946  | SERTA domain containing 3                                                                                                                          | Homo sapiens |
| 4990   | SIX homeobox 6                                                                                                                                     | Homo sapiens |
| 6671   | Sp4 transcription factor                                                                                                                           | Homo sapiens |
| 118813 | zinc finger, FYVE domain containing 27                                                                                                             | Homo sapiens |
| 5565   | protein kinase, AMP-activated, beta 2 non-catalytic subunit                                                                                        | Homo sapiens |
| 22     | ATP-binding cassette, sub-family B (MDR/TAP), member 7                                                                                             | Homo sapiens |
| 55003  | PAK1 interacting protein 1                                                                                                                         | Homo sapiens |
| 89780  | wingless-type MMTV integration site family, member 3A                                                                                              | Homo sapiens |
| 10311  | Down syndrome critical region gene 3                                                                                                               | Homo sapiens |

|           |                                                                                                                                                                                                                                     |              |
|-----------|-------------------------------------------------------------------------------------------------------------------------------------------------------------------------------------------------------------------------------------|--------------|
| 441032    | eukaryotic translation elongation factor 1 alpha-like 7; eukaryotic translation elongation factor 1 alpha-like 3; similar to eukaryotic translation elongation factor 1 alpha 1; eukaryotic translation elongation factor 1 alpha 1 | Homo sapiens |
| 158078    | eukaryotic translation elongation factor 1 alpha-like 7; eukaryotic translation elongation factor 1 alpha-like 3; similar to eukaryotic translation elongation factor 1 alpha 1; eukaryotic translation elongation factor 1 alpha 1 | Homo sapiens |
| 645715    | eukaryotic translation elongation factor 1 alpha-like 7; eukaryotic translation elongation factor 1 alpha-like 3; similar to eukaryotic translation elongation factor 1 alpha 1; eukaryotic translation elongation factor 1 alpha 1 | Homo sapiens |
| 1915      | eukaryotic translation elongation factor 1 alpha-like 7; eukaryotic translation elongation factor 1 alpha-like 3; similar to eukaryotic translation elongation factor 1 alpha 1; eukaryotic translation elongation factor 1 alpha 1 | Homo sapiens |
| 5775      | protein tyrosine phosphatase, non-receptor type 4 (megakaryocyte)                                                                                                                                                                   | Homo sapiens |
| 121536    | AE binding protein 2                                                                                                                                                                                                                | Homo sapiens |
| 22859     | latrophilin 1                                                                                                                                                                                                                       | Homo sapiens |
| 80045     | G protein-coupled receptor 157                                                                                                                                                                                                      | Homo sapiens |
| 51259     | transmembrane protein 216                                                                                                                                                                                                           | Homo sapiens |
| 219927    | mitochondrial ribosomal protein L21                                                                                                                                                                                                 | Homo sapiens |
| 51550     | cyclin-dependent kinase 2-interacting protein                                                                                                                                                                                       | Homo sapiens |
| 145282    | mirror-image polydactyly 1                                                                                                                                                                                                          | Homo sapiens |
| 8446      | dual specificity phosphatase 11 (RNA/RNP complex 1-interacting)                                                                                                                                                                     | Homo sapiens |
| 3151      | hypothetical LOC729505; similar to hCG2040565; high-mobility group nucleosomal binding domain 2; similar to high-mobility group nucleosomal binding domain 2                                                                        | Homo sapiens |
| 648822    | hypothetical LOC729505; similar to hCG2040565; high-mobility group nucleosomal binding domain 2; similar to high-mobility group nucleosomal binding domain 2                                                                        | Homo sapiens |
| 729505    | hypothetical LOC729505; similar to hCG2040565; high-mobility group nucleosomal binding domain 2; similar to high-mobility group nucleosomal binding domain 2                                                                        | Homo sapiens |
| 729687    | hypothetical LOC729505; similar to hCG2040565; high-mobility group nucleosomal binding domain 2; similar to high-mobility group nucleosomal binding domain 2                                                                        | Homo sapiens |
| 4536      | NADH-ubiquinone oxidoreductase chain 2                                                                                                                                                                                              | Homo sapiens |
| 6775094   | NADH-ubiquinone oxidoreductase chain 2                                                                                                                                                                                              | Homo sapiens |
| 79053     | asparagine-linked glycosylation 8, alpha-1,3-glucosyltransferase homolog (S. cerevisiae)                                                                                                                                            | Homo sapiens |
| 23355     | vacuolar protein sorting 8 homolog (S. cerevisiae)                                                                                                                                                                                  | Homo sapiens |
| 4053      | latent transforming growth factor beta binding protein 2                                                                                                                                                                            | Homo sapiens |
| 9513      | fragile X mental retardation, autosomal homolog 2                                                                                                                                                                                   | Homo sapiens |
| 7090      | transducin-like enhancer of split 3 (E(spl) homolog, Drosophila)                                                                                                                                                                    | Homo sapiens |
| 2182      | acyl-CoA synthetase long-chain family member 4                                                                                                                                                                                      | Homo sapiens |
| 10181     | RNA binding motif protein 5                                                                                                                                                                                                         | Homo sapiens |
| 147463    | ankyrin repeat domain 29                                                                                                                                                                                                            | Homo sapiens |
| 8451      | cullin 4A                                                                                                                                                                                                                           | Homo sapiens |
| 100130746 | AKT interacting protein; similar to AKT interacting protein                                                                                                                                                                         | Homo sapiens |
| 64400     | AKT interacting protein; similar to AKT interacting protein                                                                                                                                                                         | Homo sapiens |
| 131076    | coiled-coil domain containing 58                                                                                                                                                                                                    | Homo sapiens |
| 653639    | lysophospholipase II pseudogene 1; lysophospholipase II                                                                                                                                                                             | Homo sapiens |
| 11313     | lysophospholipase II pseudogene 1; lysophospholipase II                                                                                                                                                                             | Homo sapiens |
| 339263    | chromosome 17 open reading frame 51                                                                                                                                                                                                 | Homo sapiens |
| 8717      | TNFRSF1A-associated via death domain                                                                                                                                                                                                | Homo sapiens |
| 55568     | UDP-N-acetyl-alpha-D-galactosamine:polypeptide N-acetylgalactosaminyltransferase 10 (GalNAc-T10)                                                                                                                                    | Homo sapiens |
| 146923    | RUN domain containing 1                                                                                                                                                                                                             | Homo sapiens |
| 140803    | transient receptor potential cation channel, subfamily M, member 6                                                                                                                                                                  | Homo sapiens |
| 10762     | nucleoporin 50kDa                                                                                                                                                                                                                   | Homo sapiens |
| 51428     | DEAD (Asp-Glu-Ala-Asp) box polypeptide 41                                                                                                                                                                                           | Homo sapiens |
| 71        | actin, gamma 1                                                                                                                                                                                                                      | Homo sapiens |
| 134637    | adenosine deaminase, tRNA-specific 2, TAD2 homolog (S. cerevisiae)                                                                                                                                                                  | Homo sapiens |
| 7164      | tumor protein D52-like 1                                                                                                                                                                                                            | Homo sapiens |
| 5738      | prostaglandin F2 receptor negative regulator                                                                                                                                                                                        | Homo sapiens |
| 9604      | ring finger protein 14                                                                                                                                                                                                              | Homo sapiens |
| 5817      | poliovirus receptor                                                                                                                                                                                                                 | Homo sapiens |
| 1528      | cytochrome b5 type A (microsomal)                                                                                                                                                                                                   | Homo sapiens |
| 22907     | DEAH (Asp-Glu-Ala-His) box polypeptide 30                                                                                                                                                                                           | Homo sapiens |
| 28972     | signal peptidase complex subunit 1 homolog (S. cerevisiae)                                                                                                                                                                          | Homo sapiens |
| 3779      | potassium large conductance calcium-activated channel, subfamily M, beta member 1                                                                                                                                                   | Homo sapiens |
| 525       | ATPase, H <sup>+</sup> transporting, lysosomal 56/58kDa, V1 subunit B1                                                                                                                                                              | Homo sapiens |
| 11124     | Fas (TNFRSF6) associated factor 1                                                                                                                                                                                                   | Homo sapiens |
| 2181      | acyl-CoA synthetase long-chain family member 3                                                                                                                                                                                      | Homo sapiens |
| 1408      | cryptochrome 2 (photolyase-like)                                                                                                                                                                                                    | Homo sapiens |
| 645453    | ring finger protein, LIM domain interacting; similar to ring finger protein (C3H2C3 type) 6                                                                                                                                         | Homo sapiens |
| 51132     | ring finger protein, LIM domain interacting; similar to ring finger protein (C3H2C3 type) 6                                                                                                                                         | Homo sapiens |
| 54429     | taste receptor, type 2, member 5                                                                                                                                                                                                    | Homo sapiens |
| 23640     | HSPA (heat shock 70kDa) binding protein, cytoplasmic cochaperone 1                                                                                                                                                                  | Homo sapiens |
| 51284     | toll-like receptor 7                                                                                                                                                                                                                | Homo sapiens |
| 90196     | SYS1 Golgi-localized integral membrane protein homolog (S. cerevisiae)                                                                                                                                                              | Homo sapiens |
| 10787     | NCK-associated protein 1                                                                                                                                                                                                            | Homo sapiens |
| 25873     | ribosomal protein L36; ribosomal protein L36 pseudogene 14                                                                                                                                                                          | Homo sapiens |
| 347292    | ribosomal protein L36; ribosomal protein L36 pseudogene 14                                                                                                                                                                          | Homo sapiens |
| 51227     | phosphatidylinositol glycan anchor biosynthesis, class P                                                                                                                                                                            | Homo sapiens |



|           |                                                                                                                                                                                                                |              |
|-----------|----------------------------------------------------------------------------------------------------------------------------------------------------------------------------------------------------------------|--------------|
| 1454      | casein kinase 1, epsilon                                                                                                                                                                                       | Homo sapiens |
| 23203     | peptidase (mitochondrial processing) alpha                                                                                                                                                                     | Homo sapiens |
| 80025     | pantothenate kinase 2                                                                                                                                                                                          | Homo sapiens |
| 286319    | tumor suppressor candidate 1                                                                                                                                                                                   | Homo sapiens |
| 7003      | TEA domain family member 1 (SV40 transcriptional enhancer factor)                                                                                                                                              | Homo sapiens |
| 26995     | TruB pseudouridine (psi) synthase homolog 2 (E. coli)                                                                                                                                                          | Homo sapiens |
| 27327     | trinucleotide repeat containing 6A                                                                                                                                                                             | Homo sapiens |
| 285016    | family with sequence similarity 150, member B                                                                                                                                                                  | Homo sapiens |
| 960       | CD44 molecule (Indian blood group)                                                                                                                                                                             | Homo sapiens |
| 222658    | potassium channel tetramerisation domain containing 20                                                                                                                                                         | Homo sapiens |
| 55300     | phosphatidylinositol 4-kinase type 2 beta                                                                                                                                                                      | Homo sapiens |
| 5583      | protein kinase C, eta                                                                                                                                                                                          | Homo sapiens |
| 100131387 | ribosomal protein L39 pseudogene 10; ribosomal protein L39 pseudogene 20; ribosomal protein L39 pseudogene 27; ribosomal protein L39; ribosomal protein L39 pseudogene 13; ribosomal protein L39 pseudogene 32 | Homo sapiens |
| 100130802 | ribosomal protein L39 pseudogene 10; ribosomal protein L39 pseudogene 20; ribosomal protein L39 pseudogene 27; ribosomal protein L39; ribosomal protein L39 pseudogene 13; ribosomal protein L39 pseudogene 32 | Homo sapiens |
| 100133222 | ribosomal protein L39 pseudogene 10; ribosomal protein L39 pseudogene 20; ribosomal protein L39 pseudogene 27; ribosomal protein L39; ribosomal protein L39 pseudogene 13; ribosomal protein L39 pseudogene 32 | Homo sapiens |
| 100131160 | ribosomal protein L39 pseudogene 10; ribosomal protein L39 pseudogene 20; ribosomal protein L39 pseudogene 27; ribosomal protein L39; ribosomal protein L39 pseudogene 13; ribosomal protein L39 pseudogene 32 | Homo sapiens |
| 6170      | ribosomal protein L39 pseudogene 10; ribosomal protein L39 pseudogene 20; ribosomal protein L39 pseudogene 27; ribosomal protein L39; ribosomal protein L39 pseudogene 13; ribosomal protein L39 pseudogene 32 | Homo sapiens |
| 100129952 | ribosomal protein L39 pseudogene 10; ribosomal protein L39 pseudogene 20; ribosomal protein L39 pseudogene 27; ribosomal protein L39; ribosomal protein L39 pseudogene 13; ribosomal protein L39 pseudogene 32 | Homo sapiens |
| 54760     | proprotein convertase subtilisin/kexin type 4                                                                                                                                                                  | Homo sapiens |
| 51531     | chromosome 9 open reading frame 156                                                                                                                                                                            | Homo sapiens |
| 9898      | ubiquitin associated protein 2-like                                                                                                                                                                            | Homo sapiens |
| 23105     | folliculin-like 4                                                                                                                                                                                              | Homo sapiens |
| 23392     | KIAA0368                                                                                                                                                                                                       | Homo sapiens |
| 23503     | zinc finger, FYVE domain containing 26                                                                                                                                                                         | Homo sapiens |
| 5425      | polymerase (DNA directed), delta 2, regulatory subunit 50kDa                                                                                                                                                   | Homo sapiens |
| 1192      | chloride intracellular channel 1                                                                                                                                                                               | Homo sapiens |
| 55573     | CDV3 homolog (mouse)                                                                                                                                                                                           | Homo sapiens |
| 11196     | SEC23 interacting protein                                                                                                                                                                                      | Homo sapiens |
| 89970     | ring finger and SPRY domain containing 1                                                                                                                                                                       | Homo sapiens |
| 89122     | tripartite motif-containing 4                                                                                                                                                                                  | Homo sapiens |
| 79642     | arylsulfatase family, member J                                                                                                                                                                                 | Homo sapiens |
| 91768     | Cdk5 and Abl enzyme substrate 1                                                                                                                                                                                | Homo sapiens |
| 6908      | TATA box binding protein                                                                                                                                                                                       | Homo sapiens |
| 89790     | sialic acid binding Ig-like lectin 10                                                                                                                                                                          | Homo sapiens |
| 114821    | SCAN domain containing 3                                                                                                                                                                                       | Homo sapiens |
| 166336    | prickle homolog 2 (Drosophila)                                                                                                                                                                                 | Homo sapiens |
| 5829      | paxillin                                                                                                                                                                                                       | Homo sapiens |
| 9020      | mitogen-activated protein kinase kinase kinase 14                                                                                                                                                              | Homo sapiens |
| 56256     | SERTA domain containing 4                                                                                                                                                                                      | Homo sapiens |
| 5420      | podocalyxin-like                                                                                                                                                                                               | Homo sapiens |
| 54584     | guanine nucleotide binding protein (G protein), beta polypeptide 1-like                                                                                                                                        | Homo sapiens |
| 130132    | raftlin family member 2                                                                                                                                                                                        | Homo sapiens |
| 84331     | chromosome 16 open reading frame 14                                                                                                                                                                            | Homo sapiens |
| 8439      | neutral sphingomyelinase (N-SMase) activation associated factor                                                                                                                                                | Homo sapiens |
| 147949    | zinc finger protein 583                                                                                                                                                                                        | Homo sapiens |
| 51557     | lengsin, lens protein with glutamine synthetase domain                                                                                                                                                         | Homo sapiens |
| 10939     | AFG3 ATPase family gene 3-like 2 (yeast)                                                                                                                                                                       | Homo sapiens |
| 90249     | unc-5 homolog A (C. elegans)                                                                                                                                                                                   | Homo sapiens |
| 673       | v-raf murine sarcoma viral oncogene homolog B1                                                                                                                                                                 | Homo sapiens |
| 51378     | angiopoietin 4                                                                                                                                                                                                 | Homo sapiens |
| 6305      | SET binding factor 1; SET binding factor 1 pseudogene 1                                                                                                                                                        | Homo sapiens |
| 100133234 | SET binding factor 1; SET binding factor 1 pseudogene 1                                                                                                                                                        | Homo sapiens |
| 3710      | inositol 1,4,5-triphosphate receptor, type 3                                                                                                                                                                   | Homo sapiens |
| 51397     | COMM domain containing 10                                                                                                                                                                                      | Homo sapiens |
| 728453    | ribosomal protein S28 pseudogene 6; ribosomal protein S28 pseudogene 9; ribosomal protein S28                                                                                                                  | Homo sapiens |
| 650788    | ribosomal protein S28 pseudogene 6; ribosomal protein S28 pseudogene 9; ribosomal protein S28                                                                                                                  | Homo sapiens |
| 6234      | ribosomal protein S28 pseudogene 6; ribosomal protein S28 pseudogene 9; ribosomal protein S28                                                                                                                  | Homo sapiens |
| 10775     | processing of precursor 4, ribonuclease P/MRP subunit (S. cerevisiae)                                                                                                                                          | Homo sapiens |
| 4204      | methyl CpG binding protein 2 (Rett syndrome)                                                                                                                                                                   | Homo sapiens |
| 6773      | signal transducer and activator of transcription 2, 113kDa                                                                                                                                                     | Homo sapiens |
| 6751      | somatostatin receptor 1                                                                                                                                                                                        | Homo sapiens |
| 65123     | integrator complex subunit 3                                                                                                                                                                                   | Homo sapiens |
| 154043    | membrane associated guanylate kinase, WW and PDZ domain containing 1; CNKSR family member 3                                                                                                                    | Homo sapiens |

|        |                                                                                                                           |              |
|--------|---------------------------------------------------------------------------------------------------------------------------|--------------|
| 9223   | membrane associated guanylate kinase, WW and PDZ domain containing 1; CNKSR family member 3                               | Homo sapiens |
| 26528  | DAZ associated protein 1                                                                                                  | Homo sapiens |
| 128822 | cystatin 9 (testatin)                                                                                                     | Homo sapiens |
| 617    | BCS1-like (yeast)                                                                                                         | Homo sapiens |
| 84162  | KIAA1109                                                                                                                  | Homo sapiens |
| 205717 | KIAA2018                                                                                                                  | Homo sapiens |
| 3716   | Janus kinase 1                                                                                                            | Homo sapiens |
| 10395  | deleted in liver cancer 1                                                                                                 | Homo sapiens |
| 4293   | mitogen-activated protein kinase kinase kinase 9                                                                          | Homo sapiens |
| 284119 | polymerase I and transcript release factor                                                                                | Homo sapiens |
| 126393 | heat shock protein, alpha-crystallin-related, B6                                                                          | Homo sapiens |
| 6293   | vacuolar protein sorting 52 homolog (S. cerevisiae)                                                                       | Homo sapiens |
| 23515  | MORC family CW-type zinc finger 3                                                                                         | Homo sapiens |
| 8639   | amine oxidase, copper containing 3 (vascular adhesion protein 1)                                                          | Homo sapiens |
| 23097  | cell division cycle 2-like 6 (CDK8-like)                                                                                  | Homo sapiens |
| 257068 | pleckstrin homology-like domain, family B, member 2; phosphatidylinositol-specific phospholipase C, X domain containing 2 | Homo sapiens |
| 90102  | pleckstrin homology-like domain, family B, member 2; phosphatidylinositol-specific phospholipase C, X domain containing 2 | Homo sapiens |
| 25929  | gem (nuclear organelle) associated protein 5                                                                              | Homo sapiens |
| 3065   | histone deacetylase 1                                                                                                     | Homo sapiens |
| 202243 | coiled-coil domain containing 125                                                                                         | Homo sapiens |
| 392862 | glutamate receptor, ionotropic, delta 2 (Grid2) interacting protein                                                       | Homo sapiens |
| 988    | CDC5 cell division cycle 5-like (S. pombe)                                                                                | Homo sapiens |
| 399665 | family with sequence similarity 102, member A                                                                             | Homo sapiens |
| 65220  | NAD kinase                                                                                                                | Homo sapiens |
| 440311 | glioma tumor suppressor candidate region gene 2; glioma tumor suppressor candidate region gene 2 pseudogene               | Homo sapiens |
| 29997  | glioma tumor suppressor candidate region gene 2; glioma tumor suppressor candidate region gene 2 pseudogene               | Homo sapiens |
| 8208   | chromatin assembly factor 1, subunit B (p60)                                                                              | Homo sapiens |
| 4302   | myeloid/lymphoid or mixed-lineage leukemia (trithorax homolog, Drosophila); translocated to, 6                            | Homo sapiens |
| 83637  | zinc finger, MIZ-type containing 2                                                                                        | Homo sapiens |
| 90233  | zinc finger protein 551                                                                                                   | Homo sapiens |
| 6546   | solute carrier family 8 (sodium/calcium exchanger), member 1                                                              | Homo sapiens |
| 10797  | methylenetetrahydrofolate dehydrogenase (NADP+ dependent) 2, methenyltetrahydrofolate cyclohydrolase                      | Homo sapiens |
| 1948   | ephrin-B2                                                                                                                 | Homo sapiens |
| 158345 | ribosomal protein L4; ribosomal protein L4 pseudogene 5; ribosomal protein L4 pseudogene 4                                | Homo sapiens |
| 647276 | ribosomal protein L4; ribosomal protein L4 pseudogene 5; ribosomal protein L4 pseudogene 4                                | Homo sapiens |
| 6124   | ribosomal protein L4; ribosomal protein L4 pseudogene 5; ribosomal protein L4 pseudogene 4                                | Homo sapiens |
| 5689   | proteasome (prosome, macropain) subunit, beta type, 1                                                                     | Homo sapiens |
| 9743   | Rho GTPase-activating protein                                                                                             | Homo sapiens |
| 3205   | homeobox A9                                                                                                               | Homo sapiens |
| 23314  | SATB homeobox 2                                                                                                           | Homo sapiens |
| 54878  | dipeptidyl-peptidase 8                                                                                                    | Homo sapiens |
| 440    | asparagine synthetase                                                                                                     | Homo sapiens |
| 340719 | nanos homolog 1 (Drosophila)                                                                                              | Homo sapiens |
| 79089  | transmembrane and ubiquitin-like domain containing 2                                                                      | Homo sapiens |
| 328    | APEX nuclease (multifunctional DNA repair enzyme) 1                                                                       | Homo sapiens |
| 8239   | ubiquitin specific peptidase 9, X-linked                                                                                  | Homo sapiens |
| 7424   | vascular endothelial growth factor C                                                                                      | Homo sapiens |
| 230    | aldolase C, fructose-bisphosphate                                                                                         | Homo sapiens |
| 30001  | ER01-like (S. cerevisiae)                                                                                                 | Homo sapiens |
| 687    | Kruppel-like factor 9                                                                                                     | Homo sapiens |
| 79796  | asparagine-linked glycosylation 9, alpha-1,2-mannosyltransferase homolog (S. cerevisiae)                                  | Homo sapiens |
| 1327   | cytochrome c oxidase subunit IV isoform 1                                                                                 | Homo sapiens |
| 4052   | latent transforming growth factor beta binding protein 1                                                                  | Homo sapiens |
| 92745  | solute carrier family 38, member 5                                                                                        | Homo sapiens |
| 4233   | met proto-oncogene (hepatocyte growth factor receptor)                                                                    | Homo sapiens |
| 83882  | tetraspanin 10                                                                                                            | Homo sapiens |
| 55749  | cell division cycle and apoptosis regulator 1                                                                             | Homo sapiens |
| 441549 | cerebral dopamine neurotrophic factor                                                                                     | Homo sapiens |
| 6667   | Sp1 transcription factor                                                                                                  | Homo sapiens |
| 9252   | ribosomal protein S6 kinase, 90kDa, polypeptide 5                                                                         | Homo sapiens |
| 8565   | tyrosyl-tRNA synthetase                                                                                                   | Homo sapiens |
| 57459  | GATA zinc finger domain containing 2B                                                                                     | Homo sapiens |
| 25926  | nucleolar protein 11                                                                                                      | Homo sapiens |
| 445347 | TCR gamma alternate reading frame protein; T cell receptor gamma variable 9; T cell receptor gamma constant 1             | Homo sapiens |
| 6966   | TCR gamma alternate reading frame protein; T cell receptor gamma variable 9; T cell receptor gamma constant 1             | Homo sapiens |
| 6983   | TCR gamma alternate reading frame protein; T cell receptor gamma variable 9; T cell receptor gamma constant 1             | Homo sapiens |

|        |                                                                                                                                                                                                                                                                                                                                                 |              |
|--------|-------------------------------------------------------------------------------------------------------------------------------------------------------------------------------------------------------------------------------------------------------------------------------------------------------------------------------------------------|--------------|
| 4221   | multiple endocrine neoplasia I                                                                                                                                                                                                                                                                                                                  | Homo sapiens |
| 84898  | plexin domain containing 2                                                                                                                                                                                                                                                                                                                      | Homo sapiens |
| 57403  | RAB22A, member RAS oncogene family                                                                                                                                                                                                                                                                                                              | Homo sapiens |
| 389787 | similar to tumor protein, translationally-controlled 1; tumor protein, translationally-controlled 1                                                                                                                                                                                                                                             | Homo sapiens |
| 7178   | similar to tumor protein, translationally-controlled 1; tumor protein, translationally-controlled 1                                                                                                                                                                                                                                             | Homo sapiens |
| 285741 | similar to tumor protein, translationally-controlled 1; tumor protein, translationally-controlled 1                                                                                                                                                                                                                                             | Homo sapiens |
| 150864 | family with sequence similarity 117, member B                                                                                                                                                                                                                                                                                                   | Homo sapiens |
| 375612 | lipoma HMGIC fusion partner-like 3                                                                                                                                                                                                                                                                                                              | Homo sapiens |
| 83937  | Ras association (RalGDS/AF-6) domain family member 4                                                                                                                                                                                                                                                                                            | Homo sapiens |
| 498    | ATP synthase, H <sup>+</sup> transporting, mitochondrial F1 complex, alpha subunit 1, cardiac muscle                                                                                                                                                                                                                                            | Homo sapiens |
| 5836   | phosphorylase, glycogen, liver                                                                                                                                                                                                                                                                                                                  | Homo sapiens |
| 23500  | dishevelled associated activator of morphogenesis 2                                                                                                                                                                                                                                                                                             | Homo sapiens |
| 54919  | HEAT repeat containing 2                                                                                                                                                                                                                                                                                                                        | Homo sapiens |
| 54790  | tet oncogene family member 2                                                                                                                                                                                                                                                                                                                    | Homo sapiens |
| 8632   | dynein, axonemal, heavy chain 17                                                                                                                                                                                                                                                                                                                | Homo sapiens |
| 27134  | tight junction protein 3 (zona occludens 3)                                                                                                                                                                                                                                                                                                     | Homo sapiens |
| 284086 | NIMA (never in mitosis gene a)- related kinase 8                                                                                                                                                                                                                                                                                                | Homo sapiens |
| 223    | aldehyde dehydrogenase 9 family, member A1                                                                                                                                                                                                                                                                                                      | Homo sapiens |
| 132    | adenosine kinase                                                                                                                                                                                                                                                                                                                                | Homo sapiens |
| 51317  | PHD finger protein 21A                                                                                                                                                                                                                                                                                                                          | Homo sapiens |
| 9968   | mediator complex subunit 12                                                                                                                                                                                                                                                                                                                     | Homo sapiens |
| 2779   | guanine nucleotide binding protein (G protein), alpha transducing activity polypeptide 1                                                                                                                                                                                                                                                        | Homo sapiens |
| 8379   | MAD1 mitotic arrest deficient-like 1 (yeast)                                                                                                                                                                                                                                                                                                    | Homo sapiens |
| 23468  | chromobox homolog 5 (HP1 alpha homolog, Drosophila)                                                                                                                                                                                                                                                                                             | Homo sapiens |
| 246175 | CCR4-NOT transcription complex, subunit 6-like                                                                                                                                                                                                                                                                                                  | Homo sapiens |
| 124801 | LSM12 homolog (S. cerevisiae)                                                                                                                                                                                                                                                                                                                   | Homo sapiens |
| 858    | caveolin 2                                                                                                                                                                                                                                                                                                                                      | Homo sapiens |
| 248    | alkaline phosphatase, intestinal                                                                                                                                                                                                                                                                                                                | Homo sapiens |
| 115    | adenylate cyclase 9                                                                                                                                                                                                                                                                                                                             | Homo sapiens |
| 333932 | histone cluster 1, H3j; histone cluster 1, H3i; histone cluster 1, H3h; histone cluster 1, H3g; histone cluster 1, H3f; histone cluster 1, H3e; histone cluster 1, H3d; histone cluster 1, H3c; histone cluster 1, H3b; histone cluster 1, H3a; histone cluster 1, H2ad; histone cluster 2, H3a; histone cluster 2, H3c; histone cluster 2, H3d | Homo sapiens |
| 8356   | histone cluster 1, H3j; histone cluster 1, H3i; histone cluster 1, H3h; histone cluster 1, H3g; histone cluster 1, H3f; histone cluster 1, H3e; histone cluster 1, H3d; histone cluster 1, H3c; histone cluster 1, H3b; histone cluster 1, H3a; histone cluster 1, H2ad; histone cluster 2, H3a; histone cluster 2, H3c; histone cluster 2, H3d | Homo sapiens |
| 8355   | histone cluster 1, H3j; histone cluster 1, H3i; histone cluster 1, H3h; histone cluster 1, H3g; histone cluster 1, H3f; histone cluster 1, H3e; histone cluster 1, H3d; histone cluster 1, H3c; histone cluster 1, H3b; histone cluster 1, H3a; histone cluster 1, H2ad; histone cluster 2, H3a; histone cluster 2, H3c; histone cluster 2, H3d | Homo sapiens |
| 8352   | histone cluster 1, H3j; histone cluster 1, H3i; histone cluster 1, H3h; histone cluster 1, H3g; histone cluster 1, H3f; histone cluster 1, H3e; histone cluster 1, H3d; histone cluster 1, H3c; histone cluster 1, H3b; histone cluster 1, H3a; histone cluster 1, H2ad; histone cluster 2, H3a; histone cluster 2, H3c; histone cluster 2, H3d | Homo sapiens |
| 8350   | histone cluster 1, H3j; histone cluster 1, H3i; histone cluster 1, H3h; histone cluster 1, H3g; histone cluster 1, H3f; histone cluster 1, H3e; histone cluster 1, H3d; histone cluster 1, H3c; histone cluster 1, H3b; histone cluster 1, H3a; histone cluster 1, H2ad; histone cluster 2, H3a; histone cluster 2, H3c; histone cluster 2, H3d | Homo sapiens |
| 653604 | histone cluster 1, H3j; histone cluster 1, H3i; histone cluster 1, H3h; histone cluster 1, H3g; histone cluster 1, H3f; histone cluster 1, H3e; histone cluster 1, H3d; histone cluster 1, H3c; histone cluster 1, H3b; histone cluster 1, H3a; histone cluster 1, H2ad; histone cluster 2, H3a; histone cluster 2, H3c; histone cluster 2, H3d | Homo sapiens |
| 8968   | histone cluster 1, H3j; histone cluster 1, H3i; histone cluster 1, H3h; histone cluster 1, H3g; histone cluster 1, H3f; histone cluster 1, H3e; histone cluster 1, H3d; histone cluster 1, H3c; histone cluster 1, H3b; histone cluster 1, H3a; histone cluster 1, H2ad; histone cluster 2, H3a; histone cluster 2, H3c; histone cluster 2, H3d | Homo sapiens |
| 8358   | histone cluster 1, H3j; histone cluster 1, H3i; histone cluster 1, H3h; histone cluster 1, H3g; histone cluster 1, H3f; histone cluster 1, H3e; histone cluster 1, H3d; histone cluster 1, H3c; histone cluster 1, H3b; histone cluster 1, H3a; histone cluster 1, H2ad; histone cluster 2, H3a; histone cluster 2, H3c; histone cluster 2, H3d | Homo sapiens |
| 126961 | histone cluster 1, H3j; histone cluster 1, H3i; histone cluster 1, H3h; histone cluster 1, H3g; histone cluster 1, H3f; histone cluster 1, H3e; histone cluster 1, H3d; histone cluster 1, H3c; histone cluster 1, H3b; histone cluster 1, H3a; histone cluster 1, H2ad; histone cluster 2, H3a; histone cluster 2, H3c; histone cluster 2, H3d | Homo sapiens |
| 8357   | histone cluster 1, H3j; histone cluster 1, H3i; histone cluster 1, H3h; histone cluster 1, H3g; histone cluster 1, H3f; histone cluster 1, H3e; histone cluster 1, H3d; histone cluster 1, H3c; histone cluster 1, H3b; histone cluster 1, H3a; histone cluster 1, H2ad; histone cluster 2, H3a; histone cluster 2, H3c; histone cluster 2, H3d | Homo sapiens |
| 8353   | histone cluster 1, H3j; histone cluster 1, H3i; histone cluster 1, H3h; histone cluster 1, H3g; histone cluster 1, H3f; histone cluster 1, H3e; histone cluster 1, H3d; histone cluster 1, H3c; histone cluster 1, H3b; histone cluster 1, H3a; histone cluster 1, H2ad; histone cluster 2, H3a; histone cluster 2, H3c; histone cluster 2, H3d | Homo sapiens |

|        |                                                                                                                                                                                                                                                                                                                                                 |              |
|--------|-------------------------------------------------------------------------------------------------------------------------------------------------------------------------------------------------------------------------------------------------------------------------------------------------------------------------------------------------|--------------|
| 3013   | histone cluster 1, H3j; histone cluster 1, H3i; histone cluster 1, H3h; histone cluster 1, H3g; histone cluster 1, H3f; histone cluster 1, H3e; histone cluster 1, H3d; histone cluster 1, H3c; histone cluster 1, H3b; histone cluster 1, H3a; histone cluster 1, H2ad; histone cluster 2, H3a; histone cluster 2, H3c; histone cluster 2, H3d | Homo sapiens |
| 8354   | histone cluster 1, H3j; histone cluster 1, H3i; histone cluster 1, H3h; histone cluster 1, H3g; histone cluster 1, H3f; histone cluster 1, H3e; histone cluster 1, H3d; histone cluster 1, H3c; histone cluster 1, H3b; histone cluster 1, H3a; histone cluster 1, H2ad; histone cluster 2, H3a; histone cluster 2, H3c; histone cluster 2, H3d | Homo sapiens |
| 8351   | histone cluster 1, H3j; histone cluster 1, H3i; histone cluster 1, H3h; histone cluster 1, H3g; histone cluster 1, H3f; histone cluster 1, H3e; histone cluster 1, H3d; histone cluster 1, H3c; histone cluster 1, H3b; histone cluster 1, H3a; histone cluster 1, H2ad; histone cluster 2, H3a; histone cluster 2, H3c; histone cluster 2, H3d | Homo sapiens |
| 56061  | ubiquitin family domain containing 1                                                                                                                                                                                                                                                                                                            | Homo sapiens |
| 6356   | chemokine (C-C motif) ligand 11                                                                                                                                                                                                                                                                                                                 | Homo sapiens |
| 57661  | PHD and ring finger domains 1                                                                                                                                                                                                                                                                                                                   | Homo sapiens |
| 64747  | major facilitator superfamily domain containing 1                                                                                                                                                                                                                                                                                               | Homo sapiens |
| 246721 | polymerase (RNA) II (DNA directed) polypeptide J3; polymerase (RNA) II (DNA directed) polypeptide J2                                                                                                                                                                                                                                            | Homo sapiens |
| 548644 | polymerase (RNA) II (DNA directed) polypeptide J3; polymerase (RNA) II (DNA directed) polypeptide J2                                                                                                                                                                                                                                            | Homo sapiens |
| 55663  | zinc finger protein 446                                                                                                                                                                                                                                                                                                                         | Homo sapiens |
| 3690   | integrin, beta 3 (platelet glycoprotein IIIa, antigen CD61)                                                                                                                                                                                                                                                                                     | Homo sapiens |
| 6496   | SIX homeobox 3                                                                                                                                                                                                                                                                                                                                  | Homo sapiens |
| 56133  | protocadherin beta 2                                                                                                                                                                                                                                                                                                                            | Homo sapiens |
| 51258  | mitochondrial ribosomal protein L51                                                                                                                                                                                                                                                                                                             | Homo sapiens |
| 9782   | matrin 3                                                                                                                                                                                                                                                                                                                                        | Homo sapiens |
| 5558   | primase, DNA, polypeptide 2 (58kDa)                                                                                                                                                                                                                                                                                                             | Homo sapiens |
| 5925   | retinoblastoma 1                                                                                                                                                                                                                                                                                                                                | Homo sapiens |
| 342184 | formin 1                                                                                                                                                                                                                                                                                                                                        | Homo sapiens |
| 84934  | chromosome 12 open reading frame 52                                                                                                                                                                                                                                                                                                             | Homo sapiens |
| 112476 | proline-rich transmembrane protein 2                                                                                                                                                                                                                                                                                                            | Homo sapiens |
| 2016   | empty spiracles homeobox 1                                                                                                                                                                                                                                                                                                                      | Homo sapiens |
| 6297   | sal-like 2 (Drosophila)                                                                                                                                                                                                                                                                                                                         | Homo sapiens |
| 90379  | chromosome 19 open reading frame 72                                                                                                                                                                                                                                                                                                             | Homo sapiens |
| 55075  | uveal autoantigen with coiled-coil domains and ankyrin repeats                                                                                                                                                                                                                                                                                  | Homo sapiens |
| 1500   | catenin (cadherin-associated protein), delta 1                                                                                                                                                                                                                                                                                                  | Homo sapiens |
| 29766  | tropomodulin 3 (ubiquitous)                                                                                                                                                                                                                                                                                                                     | Homo sapiens |
| 6780   | staufen, RNA binding protein, homolog 1 (Drosophila)                                                                                                                                                                                                                                                                                            | Homo sapiens |
| 342527 | smoothelin-like 2                                                                                                                                                                                                                                                                                                                               | Homo sapiens |
| 6923   | transcription elongation factor B (SIII), polypeptide 2 (18kDa, elongin B)                                                                                                                                                                                                                                                                      | Homo sapiens |
| 7074   | T-cell lymphoma invasion and metastasis 1                                                                                                                                                                                                                                                                                                       | Homo sapiens |
| 57498  | kinase D-interacting substrate, 220kDa                                                                                                                                                                                                                                                                                                          | Homo sapiens |
| 79832  | glutamine and serine rich 1                                                                                                                                                                                                                                                                                                                     | Homo sapiens |
| 80028  | F-box and leucine-rich repeat protein 18                                                                                                                                                                                                                                                                                                        | Homo sapiens |
| 7040   | transforming growth factor, beta 1                                                                                                                                                                                                                                                                                                              | Homo sapiens |
| 10236  | heterogeneous nuclear ribonucleoprotein R                                                                                                                                                                                                                                                                                                       | Homo sapiens |
| 11145  | phospholipase A2, group XVI                                                                                                                                                                                                                                                                                                                     | Homo sapiens |
| 1266   | calponin 3, acidic                                                                                                                                                                                                                                                                                                                              | Homo sapiens |
| 79776  | zinc finger homeobox 4                                                                                                                                                                                                                                                                                                                          | Homo sapiens |
| 65975  | serine/threonine kinase 33                                                                                                                                                                                                                                                                                                                      | Homo sapiens |
| 2783   | guanine nucleotide binding protein (G protein), beta polypeptide 2                                                                                                                                                                                                                                                                              | Homo sapiens |
| 134353 | LSM11, U7 small nuclear RNA associated                                                                                                                                                                                                                                                                                                          | Homo sapiens |
| 2147   | coagulation factor II (thrombin)                                                                                                                                                                                                                                                                                                                | Homo sapiens |
| 57128  | LYR motif containing 4                                                                                                                                                                                                                                                                                                                          | Homo sapiens |
| 8829   | neuropilin 1                                                                                                                                                                                                                                                                                                                                    | Homo sapiens |
| 4660   | protein phosphatase 1, regulatory (inhibitor) subunit 12B                                                                                                                                                                                                                                                                                       | Homo sapiens |
| 10966  | RAB40B, member RAS oncogene family                                                                                                                                                                                                                                                                                                              | Homo sapiens |
| 51043  | zinc finger and BTB domain containing 7B                                                                                                                                                                                                                                                                                                        | Homo sapiens |
| 51308  | receptor accessory protein 2                                                                                                                                                                                                                                                                                                                    | Homo sapiens |
| 8838   | WNT1 inducible signaling pathway protein 3                                                                                                                                                                                                                                                                                                      | Homo sapiens |
| 151556 | G protein-coupled receptor 155                                                                                                                                                                                                                                                                                                                  | Homo sapiens |
| 286077 | family with sequence similarity 83, member H                                                                                                                                                                                                                                                                                                    | Homo sapiens |
| 7464   | coronin, actin binding protein, 2A                                                                                                                                                                                                                                                                                                              | Homo sapiens |
| 8541   | protein tyrosine phosphatase, receptor type, f polypeptide (PTPRF), interacting protein (liprin), alpha 3                                                                                                                                                                                                                                       | Homo sapiens |
| 22908  | SAC1 suppressor of actin mutations 1-like (yeast)                                                                                                                                                                                                                                                                                               | Homo sapiens |
| 8394   | phosphatidylinositol-4-phosphate 5-kinase, type I, alpha                                                                                                                                                                                                                                                                                        | Homo sapiens |
| 8427   | zinc finger protein 282                                                                                                                                                                                                                                                                                                                         | Homo sapiens |
| 56147  | protocadherin alpha 1; protocadherin alpha 4                                                                                                                                                                                                                                                                                                    | Homo sapiens |
| 56144  | protocadherin alpha 1; protocadherin alpha 4                                                                                                                                                                                                                                                                                                    | Homo sapiens |
| 6176   | ribosomal protein, large, P1                                                                                                                                                                                                                                                                                                                    | Homo sapiens |
| 23253  | ankyrin repeat domain 12                                                                                                                                                                                                                                                                                                                        | Homo sapiens |
| 10714  | polymerase (DNA-directed), delta 3, accessory subunit                                                                                                                                                                                                                                                                                           | Homo sapiens |
| 9686   | vestigial like 4 (Drosophila)                                                                                                                                                                                                                                                                                                                   | Homo sapiens |
| 5366   | phorbol-12-myristate-13-acetate-induced protein 1                                                                                                                                                                                                                                                                                               | Homo sapiens |
| 11267  | SNF8, ESCRT-II complex subunit, homolog (S. cerevisiae)                                                                                                                                                                                                                                                                                         | Homo sapiens |
| 9883   | POM121 membrane glycoprotein (rat)                                                                                                                                                                                                                                                                                                              | Homo sapiens |
| 222537 | heparan sulfate (glucosamine) 3-O-sulfotransferase 5                                                                                                                                                                                                                                                                                            | Homo sapiens |

|        |                                                                                                            |              |
|--------|------------------------------------------------------------------------------------------------------------|--------------|
| 388907 | ribosomal protein L5 pseudogene 34; ribosomal protein L5 pseudogene 1; ribosomal protein L5                | Homo sapiens |
| 6125   | ribosomal protein L5 pseudogene 34; ribosomal protein L5 pseudogene 1; ribosomal protein L5                | Homo sapiens |
| 647436 | ribosomal protein L5 pseudogene 34; ribosomal protein L5 pseudogene 1; ribosomal protein L5                | Homo sapiens |
| 2645   | glucokinase (hexokinase 4)                                                                                 | Homo sapiens |
| 3675   | integrin, alpha 3 (antigen CD49C, alpha 3 subunit of VLA-3 receptor)                                       | Homo sapiens |
| 55311  | zinc finger protein 444                                                                                    | Homo sapiens |
| 84328  | leucine zipper and CTNNBIP1 domain containing                                                              | Homo sapiens |
| 899    | cyclin F                                                                                                   | Homo sapiens |
| 6950   | hypothetical gene supported by BC000665; t-complex 1                                                       | Homo sapiens |
| 400013 | hypothetical gene supported by BC000665; t-complex 1                                                       | Homo sapiens |
| 55526  | dehydrogenase E1 and transketolase domain containing 1                                                     | Homo sapiens |
| 51719  | calcium binding protein 39                                                                                 | Homo sapiens |
| 123041 | solute carrier family 24 (sodium/potassium/calcium exchanger), member 4                                    | Homo sapiens |
| 265    | amelogenin (amelogenesis imperfecta 1, X-linked)                                                           | Homo sapiens |
| 23765  | interleukin 17 receptor A                                                                                  | Homo sapiens |
| 56886  | UDP-glucose ceramide glucosyltransferase-like 1                                                            | Homo sapiens |
| 3221   | homeobox C4                                                                                                | Homo sapiens |
| 283871 | phosphoglycolate phosphatase                                                                               | Homo sapiens |
| 79169  | chromosome 1 open reading frame 35                                                                         | Homo sapiens |
| 60526  | chromosome 2 open reading frame 43                                                                         | Homo sapiens |
| 3945   | lactate dehydrogenase B                                                                                    | Homo sapiens |
| 8739   | harakiri, BCL2 interacting protein (contains only BH3 domain)                                              | Homo sapiens |
| 144097 | chromosome 11 open reading frame 84                                                                        | Homo sapiens |
| 7474   | wingless-type MMTV integration site family, member 5A                                                      | Homo sapiens |
| 605    | B-cell CLL/lymphoma 7A                                                                                     | Homo sapiens |
| 140883 | zinc finger protein 280B                                                                                   | Homo sapiens |
| 645181 | PDGFA associated protein 1; similar to PDGFA associated protein 1                                          | Homo sapiens |
| 11333  | PDGFA associated protein 1; similar to PDGFA associated protein 1                                          | Homo sapiens |
| 2247   | fibroblast growth factor 2 (basic)                                                                         | Homo sapiens |
| 161779 | piggyBac transposable element derived 4                                                                    | Homo sapiens |
| 7163   | tumor protein D52                                                                                          | Homo sapiens |
| 441282 | aldo-keto reductase family 1, member B10 (aldose reductase); aldo-keto reductase family 1, member B10-like | Homo sapiens |
| 57016  | aldo-keto reductase family 1, member B10 (aldose reductase); aldo-keto reductase family 1, member B10-like | Homo sapiens |
| 1107   | chromodomain helicase DNA binding protein 3                                                                | Homo sapiens |
| 64769  | chromosome 1 open reading frame 149                                                                        | Homo sapiens |
| 5500   | protein phosphatase 1, catalytic subunit, beta isoform; speedy homolog A (Xenopus laevis)                  | Homo sapiens |
| 245711 | protein phosphatase 1, catalytic subunit, beta isoform; speedy homolog A (Xenopus laevis)                  | Homo sapiens |
| 80146  | UDP-glucuronate decarboxylase 1                                                                            | Homo sapiens |
| 204851 | homeodomain interacting protein kinase 1                                                                   | Homo sapiens |
| 25923  | atlastin GTPase 3                                                                                          | Homo sapiens |
| 64399  | hedgehog interacting protein                                                                               | Homo sapiens |
| 10287  | regulator of G-protein signaling 19                                                                        | Homo sapiens |
| 65244  | spermatogenesis associated, serine-rich 2                                                                  | Homo sapiens |
| 388344 | ribosomal protein L13 pseudogene 12; ribosomal protein L13                                                 | Homo sapiens |
| 6137   | ribosomal protein L13 pseudogene 12; ribosomal protein L13                                                 | Homo sapiens |
| 28232  | solute carrier organic anion transporter family, member 3A1                                                | Homo sapiens |
| 8520   | histone acetyltransferase 1                                                                                | Homo sapiens |
| 50804  | myelin expression factor 2                                                                                 | Homo sapiens |
| 119    | adducin 2 (beta)                                                                                           | Homo sapiens |
| 5160   | pyruvate dehydrogenase (lipoamide) alpha 1                                                                 | Homo sapiens |
| 84872  | zinc finger CCCH-type containing 10                                                                        | Homo sapiens |
| 80764  | THAP domain containing 7                                                                                   | Homo sapiens |
| 55553  | SRY (sex determining region Y)-box 6                                                                       | Homo sapiens |
| 56893  | ubiquilin 4                                                                                                | Homo sapiens |
| 9136   | ribosomal RNA processing 9, small subunit (SSU) processome component, homolog (yeast)                      | Homo sapiens |
| 57156  | transmembrane protein 63C                                                                                  | Homo sapiens |
| 79830  | zinc finger, MYM-type 1                                                                                    | Homo sapiens |
| 25970  | SH2B adaptor protein 1                                                                                     | Homo sapiens |
| 161527 | hypothetical protein LOC161527                                                                             | Homo sapiens |
| 4627   | myosin, heavy chain 9, non-muscle                                                                          | Homo sapiens |
| 91137  | solute carrier family 25, member 46                                                                        | Homo sapiens |
| 6007   | Rh blood group, D antigen                                                                                  | Homo sapiens |
| 6532   | solute carrier family 6 (neurotransmitter transporter, serotonin), member 4                                | Homo sapiens |
| 388403 | yippee-like 2 (Drosophila)                                                                                 | Homo sapiens |
| 8864   | period homolog 2 (Drosophila)                                                                              | Homo sapiens |
| 156    | adrenergic, beta, receptor kinase 1                                                                        | Homo sapiens |
| 55008  | hect domain and RLD 6                                                                                      | Homo sapiens |
| 51069  | mitochondrial ribosomal protein L2                                                                         | Homo sapiens |
| 84501  | spire homolog 2 (Drosophila)                                                                               | Homo sapiens |
| 3749   | potassium voltage-gated channel, Shaw-related subfamily, member 4                                          | Homo sapiens |
| 80124  | valosin containing protein (p97)/p47 complex interacting protein 1                                         | Homo sapiens |
| 55670  | peroxisomal biogenesis factor 26                                                                           | Homo sapiens |

|           |                                                                                                                                       |              |
|-----------|---------------------------------------------------------------------------------------------------------------------------------------|--------------|
| 6915      | thromboxane A2 receptor                                                                                                               | Homo sapiens |
| 57162     | pellino homolog 1 (Drosophila)                                                                                                        | Homo sapiens |
| 89891     | WD repeat domain 34                                                                                                                   | Homo sapiens |
| 6775066   | NADH-ubiquinone oxidoreductase chain 5                                                                                                | Homo sapiens |
| 4540      | NADH-ubiquinone oxidoreductase chain 5                                                                                                | Homo sapiens |
| 162998    | olfactory receptor, family 7, subfamily D, member 2                                                                                   | Homo sapiens |
| 2146      | enhancer of zeste homolog 2 (Drosophila)                                                                                              | Homo sapiens |
| 170960    | zinc finger protein 721                                                                                                               | Homo sapiens |
| 23360     | formin binding protein 4                                                                                                              | Homo sapiens |
| 57088     | phospholipid scramblase 4                                                                                                             | Homo sapiens |
| 54901     | CDK5 regulatory subunit associated protein 1-like 1                                                                                   | Homo sapiens |
| 54814     | glutamyl-peptide cyclotransferase-like                                                                                                | Homo sapiens |
| 79867     | tectonic family member 2                                                                                                              | Homo sapiens |
| 494513    | deafness, autosomal recessive 59                                                                                                      | Homo sapiens |
| 84706     | glutamic pyruvate transaminase (alanine aminotransferase) 2                                                                           | Homo sapiens |
| 8975      | ubiquitin specific peptidase 13 (isopeptidase T-3)                                                                                    | Homo sapiens |
| 116255    | monoacylglycerol O-acyltransferase 1                                                                                                  | Homo sapiens |
| 9878      | TOX high mobility group box family member 4                                                                                           | Homo sapiens |
| 2762      | GDP-mannose 4,6-dehydratase                                                                                                           | Homo sapiens |
| 1463      | neurocan                                                                                                                              | Homo sapiens |
| 25829     | transmembrane protein 184B                                                                                                            | Homo sapiens |
| 5716      | proteasome (prosome, macropain) 26S subunit, non-ATPase, 10                                                                           | Homo sapiens |
| 55593     | OTU domain containing 5                                                                                                               | Homo sapiens |
| 4698      | NADH dehydrogenase (ubiquinone) 1 alpha subcomplex, 5, 13kDa                                                                          | Homo sapiens |
| 338382    | RAB7B, member RAS oncogene family                                                                                                     | Homo sapiens |
| 5455      | POU class 3 homeobox 3                                                                                                                | Homo sapiens |
| 140823    | reactive oxygen species modulator 1                                                                                                   | Homo sapiens |
| 2948      | glutathione S-transferase mu 4                                                                                                        | Homo sapiens |
| 114786    | XK, Kell blood group complex subunit-related family, member 4                                                                         | Homo sapiens |
| 29128     | ubiquitin-like with PHD and ring finger domains 1                                                                                     | Homo sapiens |
| 29916     | sorting nexin 11                                                                                                                      | Homo sapiens |
| 8065      | cullin 5                                                                                                                              | Homo sapiens |
| 8452      | cullin 3                                                                                                                              | Homo sapiens |
| 25831     | HECT domain containing 1                                                                                                              | Homo sapiens |
| 10451     | vav 3 guanine nucleotide exchange factor                                                                                              | Homo sapiens |
| 476       | ATPase, Na <sup>+</sup> /K <sup>+</sup> transporting, alpha 1 polypeptide                                                             | Homo sapiens |
| 1656      | DEAD (Asp-Glu-Ala-Asp) box polypeptide 6                                                                                              | Homo sapiens |
| 2023      | enolase 1, (alpha)                                                                                                                    | Homo sapiens |
| 6775079   | Cytochrome c oxidase subunit 2                                                                                                        | Homo sapiens |
| 4513      | Cytochrome c oxidase subunit 2                                                                                                        | Homo sapiens |
| 644390    | similar to heterogeneous nuclear ribonucleoprotein L-like; heterogeneous nuclear ribonucleoprotein L                                  | Homo sapiens |
| 3191      | similar to heterogeneous nuclear ribonucleoprotein L-like; heterogeneous nuclear ribonucleoprotein L                                  | Homo sapiens |
| 5129      | PCTAIRE protein kinase 3                                                                                                              | Homo sapiens |
| 7414      | vinculin                                                                                                                              | Homo sapiens |
| 54865     | G patch domain containing 4                                                                                                           | Homo sapiens |
| 10116     | fem-1 homolog b (C. elegans)                                                                                                          | Homo sapiens |
| 93010     | UDP-GlcNAc:betaGal beta-1,3-N-acetylglucosaminyltransferase 7                                                                         | Homo sapiens |
| 1349      | cytochrome c oxidase subunit VIIb                                                                                                     | Homo sapiens |
| 1005      | cadherin 7, type 2                                                                                                                    | Homo sapiens |
| 953       | ectonucleoside triphosphate diphosphohydrolase 1                                                                                      | Homo sapiens |
| 84333     | polycomb group ring finger 5                                                                                                          | Homo sapiens |
| 5601      | mitogen-activated protein kinase 9                                                                                                    | Homo sapiens |
| 9134      | cyclin E2                                                                                                                             | Homo sapiens |
| 84056     | katanin p60 subunit A-like 1                                                                                                          | Homo sapiens |
| 11040     | pim-2 oncogene                                                                                                                        | Homo sapiens |
| 10815     | complexin 1                                                                                                                           | Homo sapiens |
| 5980      | REV3-like, catalytic subunit of DNA polymerase zeta (yeast)                                                                           | Homo sapiens |
| 10114     | homeodomain interacting protein kinase 3                                                                                              | Homo sapiens |
| 6391      | succinate dehydrogenase complex, subunit C, integral membrane protein, 15kDa                                                          | Homo sapiens |
| 79589     | ring finger protein 128                                                                                                               | Homo sapiens |
| 29890     | RNA binding motif protein 15B                                                                                                         | Homo sapiens |
| 92140     | metadherin                                                                                                                            | Homo sapiens |
| 83732     | RIO kinase 1 (yeast)                                                                                                                  | Homo sapiens |
| 5711      | proteasome (prosome, macropain) 26S subunit, non-ATPase, 5                                                                            | Homo sapiens |
| 154791    | chromosome 7 open reading frame 55                                                                                                    | Homo sapiens |
| 10423     | CDP-diacylglycerol--inositol 3-phosphatidyltransferase (phosphatidylinositol synthase)                                                | Homo sapiens |
| 100134291 | similar to mitogen-activated protein kinase phosphatase x; dual specificity phosphatase 22                                            | Homo sapiens |
| 56940     | similar to mitogen-activated protein kinase phosphatase x; dual specificity phosphatase 22                                            | Homo sapiens |
| 57647     | DEAH (Asp-Glu-Ala-His) box polypeptide 37                                                                                             | Homo sapiens |
| 120526    | DnaJ (Hsp40) homolog, subfamily C, member 24                                                                                          | Homo sapiens |
| 9786      | KIAA0586                                                                                                                              | Homo sapiens |
| 81553     | family with sequence similarity 49, member A                                                                                          | Homo sapiens |
| 9495      | A kinase (PRKA) anchor protein 5                                                                                                      | Homo sapiens |
| 11163     | nudix (nucleoside diphosphate linked moiety X)-type motif 4; nudix (nucleoside diphosphate linked moiety X)-type motif 4 pseudogene 1 | Homo sapiens |

|           |                                                                                                                                               |              |
|-----------|-----------------------------------------------------------------------------------------------------------------------------------------------|--------------|
| 440672    | nudix (nucleoside diphosphate linked moiety X)-type motif 4; nudix (nucleoside diphosphate linked moiety X)-type motif 4 pseudogene 1         | Homo sapiens |
| 728116    | zinc finger and BTB domain containing 8B                                                                                                      | Homo sapiens |
| 23276     | kelch-like 18 (Drosophila)                                                                                                                    | Homo sapiens |
| 9262      | serine/threonine kinase 17b                                                                                                                   | Homo sapiens |
| 80034     | cysteine-serine-rich nuclear protein 3                                                                                                        | Homo sapiens |
| 5284      | polymeric immunoglobulin receptor                                                                                                             | Homo sapiens |
| 114904    | Clq and tumor necrosis factor related protein 6                                                                                               | Homo sapiens |
| 10478     | solute carrier family 25 (mitochondrial carrier; peroxisomal membrane protein, 34kDa), member 17                                              | Homo sapiens |
| 84864     | MYC induced nuclear antigen                                                                                                                   | Homo sapiens |
| 442041    | similar to zinc finger protein 347; zinc finger protein 532                                                                                   | Homo sapiens |
| 55205     | similar to zinc finger protein 347; zinc finger protein 532                                                                                   | Homo sapiens |
| 60509     | ATP/GTP binding protein-like 5                                                                                                                | Homo sapiens |
| 8408      | unc-51-like kinase 1 (C. elegans)                                                                                                             | Homo sapiens |
| 51281     | ankyrin repeat and MYND domain containing 1                                                                                                   | Homo sapiens |
| 4200      | malic enzyme 2, NAD(+)-dependent, mitochondrial                                                                                               | Homo sapiens |
| 114793    | formin-like 2                                                                                                                                 | Homo sapiens |
| 7756      | zinc finger protein 207                                                                                                                       | Homo sapiens |
| 9733      | squamous cell carcinoma antigen recognized by T cells 3                                                                                       | Homo sapiens |
| 157769    | family with sequence similarity 91, member A1                                                                                                 | Homo sapiens |
| 6506      | solute carrier family 1 (glial high affinity glutamate transporter), member 2                                                                 | Homo sapiens |
| 4673      | nucleosome assembly protein 1-like 1                                                                                                          | Homo sapiens |
| 100132369 | WNK lysine deficient protein kinase 1; hypothetical LOC100132369                                                                              | Homo sapiens |
| 65125     | WNK lysine deficient protein kinase 1; hypothetical LOC100132369                                                                              | Homo sapiens |
| 57655     | GRAM domain containing 1A                                                                                                                     | Homo sapiens |
| 10180     | RNA binding motif protein 6                                                                                                                   | Homo sapiens |
| 10516     | fibulin 5                                                                                                                                     | Homo sapiens |
| 8573      | calcium/calmodulin-dependent serine protein kinase (MAGUK family)                                                                             | Homo sapiens |
| 1284      | collagen, type IV, alpha 2                                                                                                                    | Homo sapiens |
| 7184      | heat shock protein 90kDa beta (Grp94), member 1                                                                                               | Homo sapiens |
| 57524     | CASK interacting protein 1                                                                                                                    | Homo sapiens |
| 3760      | potassium inwardly-rectifying channel, subfamily J, member 3                                                                                  | Homo sapiens |
| 1558      | cytochrome P450, family 2, subfamily C, polypeptide 8                                                                                         | Homo sapiens |
| 131890    | G protein-coupled receptor kinase 7                                                                                                           | Homo sapiens |
| 26135     | SERPINE1 mRNA binding protein 1                                                                                                               | Homo sapiens |
| 25998     | inhibitor of Bruton agammaglobulinemia tyrosine kinase                                                                                        | Homo sapiens |
| 220       | aldehyde dehydrogenase 1 family, member A3                                                                                                    | Homo sapiens |
| 646227    | cAMP-regulated phosphoprotein 19 pseudogene; cAMP-regulated phosphoprotein, 19kDa                                                             | Homo sapiens |
| 10776     | cAMP-regulated phosphoprotein 19 pseudogene; cAMP-regulated phosphoprotein, 19kDa                                                             | Homo sapiens |
| 643896    | cAMP-regulated phosphoprotein 19 pseudogene; cAMP-regulated phosphoprotein, 19kDa                                                             | Homo sapiens |
| 57546     | pyruvate dehydrogenase phosphatase catalytic subunit 2                                                                                        | Homo sapiens |
| 51319     | arginine/serine-rich coiled-coil 1                                                                                                            | Homo sapiens |
| 645381    | similar to transducin-like enhancer of split 1 (E(spl) homolog, Drosophila); transducin-like enhancer of split 1 (E(spl) homolog, Drosophila) | Homo sapiens |
| 7088      | similar to transducin-like enhancer of split 1 (E(spl) homolog, Drosophila); transducin-like enhancer of split 1 (E(spl) homolog, Drosophila) | Homo sapiens |
| 4704      | NADH dehydrogenase (ubiquinone) 1 alpha subcomplex, 9, 39kDa                                                                                  | Homo sapiens |
| 23218     | neurobeachin-like 2                                                                                                                           | Homo sapiens |
| 57488     | family with sequence similarity 62 (C2 domain containing), member B                                                                           | Homo sapiens |
| 4026      | LIM domain containing preferred translocation partner in lipoma                                                                               | Homo sapiens |
| 57704     | glucosidase, beta (bile acid) 2                                                                                                               | Homo sapiens |
| 9924      | PAN2 poly(A) specific ribonuclease subunit homolog (S. cerevisiae)                                                                            | Homo sapiens |
| 661       | polymerase (RNA) III (DNA directed) polypeptide D, 44kDa                                                                                      | Homo sapiens |
| 29904     | eukaryotic elongation factor-2 kinase                                                                                                         | Homo sapiens |
| 84775     | zinc finger protein 607                                                                                                                       | Homo sapiens |
| 57565     | kelch-like 14 (Drosophila)                                                                                                                    | Homo sapiens |
| 51545     | zinc finger protein 581                                                                                                                       | Homo sapiens |
| 29968     | chromosome 8 open reading frame 62; phosphoserine aminotransferase 1                                                                          | Homo sapiens |
| 137133    | chromosome 8 open reading frame 62; phosphoserine aminotransferase 1                                                                          | Homo sapiens |
| 2801      | golgi autoantigen, golgin subfamily a, 2                                                                                                      | Homo sapiens |
| 2241      | fer (fps/fes related) tyrosine kinase                                                                                                         | Homo sapiens |
| 81573     | ankyrin repeat domain 13C                                                                                                                     | Homo sapiens |
| 10184     | lipoma HMGIC fusion partner-like 2                                                                                                            | Homo sapiens |
| 65264     | ubiquitin-conjugating enzyme E2Z                                                                                                              | Homo sapiens |
| 1830      | desmoglein 3 (pemphigus vulgaris antigen)                                                                                                     | Homo sapiens |
| 386607    | zinc finger protein 91 homolog (mouse); ZFP91-CNTF readthrough transcript; ciliary neurotrophic factor                                        | Homo sapiens |
| 1270      | zinc finger protein 91 homolog (mouse); ZFP91-CNTF readthrough transcript; ciliary neurotrophic factor                                        | Homo sapiens |
| 80829     | zinc finger protein 91 homolog (mouse); ZFP91-CNTF readthrough transcript; ciliary neurotrophic factor                                        | Homo sapiens |
| 4905      | N-ethylmaleimide-sensitive factor                                                                                                             | Homo sapiens |
| 5298      | phosphatidylinositol 4-kinase, catalytic, beta                                                                                                | Homo sapiens |
| 83752     | lon peptidase 2, peroxisomal                                                                                                                  | Homo sapiens |
| 9646      | Ctr9, Paf1/RNA polymerase II complex component, homolog (S. cerevisiae)                                                                       | Homo sapiens |
| 904       | cyclin T1                                                                                                                                     | Homo sapiens |
| 9909      | DENN/MADD domain containing 4B                                                                                                                | Homo sapiens |
| 547       | kinesin family member 1A                                                                                                                      | Homo sapiens |

|           |                                                                                                                                                                                                                  |              |
|-----------|------------------------------------------------------------------------------------------------------------------------------------------------------------------------------------------------------------------|--------------|
| 5309      | paired-like homeodomain 3                                                                                                                                                                                        | Homo sapiens |
| 2966      | general transcription factor IIIH, polypeptide 2, 44kDa; general transcription factor IIIH, polypeptide 2C; general transcription factor IIIH, polypeptide 2B; general transcription factor IIIH, polypeptide 2D | Homo sapiens |
| 730394    | general transcription factor IIIH, polypeptide 2, 44kDa; general transcription factor IIIH, polypeptide 2C; general transcription factor IIIH, polypeptide 2B; general transcription factor IIIH, polypeptide 2D | Homo sapiens |
| 653238    | general transcription factor IIIH, polypeptide 2, 44kDa; general transcription factor IIIH, polypeptide 2C; general transcription factor IIIH, polypeptide 2B; general transcription factor IIIH, polypeptide 2D | Homo sapiens |
| 728340    | general transcription factor IIIH, polypeptide 2, 44kDa; general transcription factor IIIH, polypeptide 2C; general transcription factor IIIH, polypeptide 2B; general transcription factor IIIH, polypeptide 2D | Homo sapiens |
| 28988     | drebrin-like                                                                                                                                                                                                     | Homo sapiens |
| 23466     | chromobox homolog 6                                                                                                                                                                                              | Homo sapiens |
| 22846     | vasohibin 1                                                                                                                                                                                                      | Homo sapiens |
| 7019      | transcription factor A, mitochondrial                                                                                                                                                                            | Homo sapiens |
| 126272    | EP300 interacting inhibitor of differentiation 2B                                                                                                                                                                | Homo sapiens |
| 4218      | RAB8A, member RAS oncogene family                                                                                                                                                                                | Homo sapiens |
| 51465     | ubiquitin-conjugating enzyme E2, J1 (UBC6 homolog, yeast)                                                                                                                                                        | Homo sapiens |
| 9963      | solute carrier family 23 (nucleobase transporters), member 1                                                                                                                                                     | Homo sapiens |
| 50852     | T cell receptor associated transmembrane adaptor 1                                                                                                                                                               | Homo sapiens |
| 9528      | transmembrane protein 59                                                                                                                                                                                         | Homo sapiens |
| 1314      | coatamer protein complex, subunit alpha                                                                                                                                                                          | Homo sapiens |
| 2107      | eukaryotic translation termination factor 1                                                                                                                                                                      | Homo sapiens |
| 26147     | PHD finger protein 19                                                                                                                                                                                            | Homo sapiens |
| 4191      | malate dehydrogenase 2, NAD (mitochondrial)                                                                                                                                                                      | Homo sapiens |
| 26469     | protein tyrosine phosphatase, non-receptor type 18 (brain-derived)                                                                                                                                               | Homo sapiens |
| 55862     | enoyl Coenzyme A hydratase domain containing 1                                                                                                                                                                   | Homo sapiens |
| 390980    | zinc finger protein 805                                                                                                                                                                                          | Homo sapiens |
| 1947      | ephrin-B1                                                                                                                                                                                                        | Homo sapiens |
| 25921     | zinc finger, DHHC-type containing 5                                                                                                                                                                              | Homo sapiens |
| 26090     | abhydrolase domain containing 12                                                                                                                                                                                 | Homo sapiens |
| 163786    | spindle assembly 6 homolog (C. elegans)                                                                                                                                                                          | Homo sapiens |
| 8914      | timeless homolog (Drosophila)                                                                                                                                                                                    | Homo sapiens |
| 6311      | ataxin 2                                                                                                                                                                                                         | Homo sapiens |
| 643446    | similar to ribonucleic acid binding protein S1; RNA binding protein S1, serine-rich domain                                                                                                                       | Homo sapiens |
| 10921     | similar to ribonucleic acid binding protein S1; RNA binding protein S1, serine-rich domain                                                                                                                       | Homo sapiens |
| 9958      | ubiquitin specific peptidase 15                                                                                                                                                                                  | Homo sapiens |
| 1890      | thymidine phosphorylase                                                                                                                                                                                          | Homo sapiens |
| 8079      | myeloid leukemia factor 2                                                                                                                                                                                        | Homo sapiens |
| 55333     | synaptojanin 2 binding protein                                                                                                                                                                                   | Homo sapiens |
| 55293     | UEV and lactate/malate dehydrogenase domains                                                                                                                                                                     | Homo sapiens |
| 2870      | G protein-coupled receptor kinase 6                                                                                                                                                                              | Homo sapiens |
| 445815    | A kinase (PRKA) anchor protein 2; paralemmin 2; PALM2-AKAP2 readthrough transcript                                                                                                                               | Homo sapiens |
| 11217     | A kinase (PRKA) anchor protein 2; paralemmin 2; PALM2-AKAP2 readthrough transcript                                                                                                                               | Homo sapiens |
| 114299    | A kinase (PRKA) anchor protein 2; paralemmin 2; PALM2-AKAP2 readthrough transcript                                                                                                                               | Homo sapiens |
| 100131401 | basic transcription factor 3-like 4; similar to hCG2008008                                                                                                                                                       | Homo sapiens |
| 91408     | basic transcription factor 3-like 4; similar to hCG2008008                                                                                                                                                       | Homo sapiens |
| 128240    | apolipoprotein A-I binding protein                                                                                                                                                                               | Homo sapiens |
| 51377     | ubiquitin carboxyl-terminal hydrolase L5                                                                                                                                                                         | Homo sapiens |
| 65005     | mitochondrial ribosomal protein L9                                                                                                                                                                               | Homo sapiens |
| 346653    | family with sequence similarity 71, member F2                                                                                                                                                                    | Homo sapiens |
| 55166     | centromere protein Q                                                                                                                                                                                             | Homo sapiens |
| 80830     | apolipoprotein L, 6                                                                                                                                                                                              | Homo sapiens |
| 6732      | SFRS protein kinase 1                                                                                                                                                                                            | Homo sapiens |
| 58516     | similar to hCG2020539; family with sequence similarity 60, member A; similar to family with sequence similarity 60, member A                                                                                     | Homo sapiens |
| 728115    | similar to hCG2020539; family with sequence similarity 60, member A; similar to family with sequence similarity 60, member A                                                                                     | Homo sapiens |
| 728592    | similar to hCG2020539; family with sequence similarity 60, member A; similar to family with sequence similarity 60, member A                                                                                     | Homo sapiens |
| 3431      | SP110 nuclear body protein                                                                                                                                                                                       | Homo sapiens |
| 4363      | ATP-binding cassette, sub-family C (CFTR/MRP), member 1                                                                                                                                                          | Homo sapiens |
| 28973     | mitochondrial ribosomal protein S18B                                                                                                                                                                             | Homo sapiens |
| 3949      | low density lipoprotein receptor                                                                                                                                                                                 | Homo sapiens |
| 10605     | poly(A) binding protein interacting protein 1; similar to poly(A) binding protein interacting protein 1                                                                                                          | Homo sapiens |
| 645139    | poly(A) binding protein interacting protein 1; similar to poly(A) binding protein interacting protein 1                                                                                                          | Homo sapiens |
| 83394     | PITPNM family member 3                                                                                                                                                                                           | Homo sapiens |
| 3157      | 3-hydroxy-3-methylglutaryl-Coenzyme A synthase 1 (soluble)                                                                                                                                                       | Homo sapiens |
| 7087      | intercellular adhesion molecule 5, telencephalin                                                                                                                                                                 | Homo sapiens |
| 10138     | YY1 associated factor 2                                                                                                                                                                                          | Homo sapiens |
| 6385      | syndecan 4                                                                                                                                                                                                       | Homo sapiens |
| 7597      | zinc finger and BTB domain containing 25                                                                                                                                                                         | Homo sapiens |
| 84614     | zinc finger and BTB domain containing 37                                                                                                                                                                         | Homo sapiens |



|           |                                                                                                                             |              |
|-----------|-----------------------------------------------------------------------------------------------------------------------------|--------------|
| 8086      | achalasia, adrenocortical insufficiency, alacrimia (Allgrove, triple-A)                                                     | Homo sapiens |
| 100130108 | zinc finger protein 98 (F7175); keratin associated protein 1-1; zinc finger protein 492; zinc finger protein 849 pseudogene | Homo sapiens |
| 57615     | zinc finger protein 98 (F7175); keratin associated protein 1-1; zinc finger protein 492; zinc finger protein 849 pseudogene | Homo sapiens |
| 81851     | zinc finger protein 98 (F7175); keratin associated protein 1-1; zinc finger protein 492; zinc finger protein 849 pseudogene | Homo sapiens |
| 148198    | zinc finger protein 98 (F7175); keratin associated protein 1-1; zinc finger protein 492; zinc finger protein 849 pseudogene | Homo sapiens |
| 6659      | SRY (sex determining region Y)-box 4                                                                                        | Homo sapiens |
| 56751     | BarH-like homeobox 1                                                                                                        | Homo sapiens |
| 159       | adenylosuccinate synthase                                                                                                   | Homo sapiens |
| 1777      | deoxyribonuclease II, lysosomal                                                                                             | Homo sapiens |
| 130502    | tetratricopeptide repeat domain 32                                                                                          | Homo sapiens |
| 192111    | phosphoglycerate mutase family member 5                                                                                     | Homo sapiens |
| 55500     | ethanolamine kinase 1                                                                                                       | Homo sapiens |
| 7035      | tissue factor pathway inhibitor (lipoprotein-associated coagulation inhibitor)                                              | Homo sapiens |
| 79801     | SHC SH2-domain binding protein 1                                                                                            | Homo sapiens |
| 201562    | protein tyrosine phosphatase-like (proline instead of catalytic arginine), member b                                         | Homo sapiens |
| 29        | active BCR-related gene                                                                                                     | Homo sapiens |
| 80317     | zinc finger with KRAB and SCAN domains 3                                                                                    | Homo sapiens |
| 55175     | kelch-like 11 (Drosophila)                                                                                                  | Homo sapiens |
| 84888     | signal peptide peptidase-like 2A                                                                                            | Homo sapiens |
| 3939      | lactate dehydrogenase A                                                                                                     | Homo sapiens |
| 116842    | liver expressed antimicrobial peptide 2                                                                                     | Homo sapiens |
| 79019     | centromere protein M                                                                                                        | Homo sapiens |
| 3268      | ArfGAP with FG repeats 2                                                                                                    | Homo sapiens |
| 157378    | transmembrane protein 65                                                                                                    | Homo sapiens |
| 6472      | serine hydroxymethyltransferase 2 (mitochondrial)                                                                           | Homo sapiens |
| 9209      | leucine rich repeat (in FLII) interacting protein 2                                                                         | Homo sapiens |
| 151742    | protein phosphatase 1 (formerly 2C)-like                                                                                    | Homo sapiens |
| 20        | ATP-binding cassette, sub-family A (ABC1), member 2                                                                         | Homo sapiens |
| 138428    | peptidyl-tRNA hydrolase 1 homolog (S. cerevisiae)                                                                           | Homo sapiens |
| 10380     | 3' (2'), 5'-bisphosphate nucleotidase 1                                                                                     | Homo sapiens |
| 9227      | lecithin retinol acyltransferase (phosphatidylcholine--retinol O-acyltransferase)                                           | Homo sapiens |
| 3005      | H1 histone family, member 0                                                                                                 | Homo sapiens |
| 25966     | C2 calcium-dependent domain containing 2                                                                                    | Homo sapiens |
| 51804     | SIX homeobox 4                                                                                                              | Homo sapiens |
| 51655     | RAS, dexamethasone-induced 1                                                                                                | Homo sapiens |
| 1762      | dystrophia myotonica, WD repeat containing                                                                                  | Homo sapiens |
| 9931      | helicase with zinc finger                                                                                                   | Homo sapiens |
| 6227      | ribosomal protein S21                                                                                                       | Homo sapiens |
| 9394      | heparan sulfate 6-O-sulfotransferase 1                                                                                      | Homo sapiens |
| 8733      | glycosylphosphatidylinositol anchor attachment protein 1 homolog (yeast)                                                    | Homo sapiens |
| 2739      | glyoxalase I                                                                                                                | Homo sapiens |
| 6734      | signal recognition particle receptor (docking protein)                                                                      | Homo sapiens |
| 10645     | calcium/calmodulin-dependent protein kinase kinase 2, beta                                                                  | Homo sapiens |
| 3842      | transportin 1                                                                                                               | Homo sapiens |
| 154810    | angiominin like 1                                                                                                           | Homo sapiens |
| 9866      | tripartite motif-containing 66                                                                                              | Homo sapiens |
| 30968     | stomatin (EPB72)-like 2                                                                                                     | Homo sapiens |
| 285521    | COX18 cytochrome c oxidase assembly homolog (S. cerevisiae)                                                                 | Homo sapiens |
| 155061    | zinc finger protein 746                                                                                                     | Homo sapiens |
| 4090      | SMAD family member 5                                                                                                        | Homo sapiens |
| 284371    | zinc finger protein 841                                                                                                     | Homo sapiens |
| 55734     | zinc finger protein 64 homolog (mouse)                                                                                      | Homo sapiens |
| 1534      | cytochrome b-561                                                                                                            | Homo sapiens |
| 115294    | protein-L-isoaspartate (D-aspartate) O-methyltransferase domain containing 1                                                | Homo sapiens |
| 1582      | cytochrome P450, family 8, subfamily B, polypeptide 1                                                                       | Homo sapiens |
| 201595    | STT3, subunit of the oligosaccharyltransferase complex, homolog B (S. cerevisiae)                                           | Homo sapiens |
| 10988     | methionyl aminopeptidase 2                                                                                                  | Homo sapiens |
| 53344     | cysteine-rich hydrophobic domain 1                                                                                          | Homo sapiens |
| 6182      | mitochondrial ribosomal protein L12                                                                                         | Homo sapiens |
| 84807     | nuclear factor of kappa light polypeptide gene enhancer in B-cells inhibitor, delta                                         | Homo sapiens |
| 6883      | TAF12 RNA polymerase II, TATA box binding protein (TBP)-associated factor, 20kDa                                            | Homo sapiens |
| 22874     | pleckstrin homology domain containing, family A member 6                                                                    | Homo sapiens |
| 9895      | tectonin beta-propeller repeat containing 2                                                                                 | Homo sapiens |
| 9899      | synaptic vesicle glycoprotein 2B; hypothetical protein LOC100128403                                                         | Homo sapiens |
| 100128403 | synaptic vesicle glycoprotein 2B; hypothetical protein LOC100128403                                                         | Homo sapiens |
| 29894     | cleavage and polyadenylation specific factor 1, 160kDa                                                                      | Homo sapiens |
| 646019    | chibby homolog 3 (Drosophila)                                                                                               | Homo sapiens |
| 81894     | solute carrier family 25, member 28                                                                                         | Homo sapiens |
| 26048     | zinc finger protein 500                                                                                                     | Homo sapiens |
| 30850     | cerebellar degeneration-related protein 2-like                                                                              | Homo sapiens |
| 23469     | PHD finger protein 3                                                                                                        | Homo sapiens |
| 108       | adenylate cyclase 2 (brain)                                                                                                 | Homo sapiens |
| 2213      | Fc fragment of IgG, low affinity IIb, receptor (CD32); Fc fragment of IgG, low affinity IIc, receptor for (CD32)            | Homo sapiens |

|           |                                                                                                                                                                                                                                                      |              |
|-----------|------------------------------------------------------------------------------------------------------------------------------------------------------------------------------------------------------------------------------------------------------|--------------|
| 9103      | Fc fragment of IgG, low affinity IIb, receptor (CD32); Fc fragment of IgG, low affinity IIc, receptor for (CD32)                                                                                                                                     | Homo sapiens |
| 23512     | suppressor of zeste 12 homolog (Drosophila)                                                                                                                                                                                                          | Homo sapiens |
| 55771     | proline rich 11                                                                                                                                                                                                                                      | Homo sapiens |
| 10838     | zinc finger protein 275                                                                                                                                                                                                                              | Homo sapiens |
| 55930     | myosin VC                                                                                                                                                                                                                                            | Homo sapiens |
| 6549      | solute carrier family 9 (sodium/hydrogen exchanger), member 2                                                                                                                                                                                        | Homo sapiens |
| 388536    | zinc finger protein 790                                                                                                                                                                                                                              | Homo sapiens |
| 1374      | carnitine palmitoyltransferase 1A (liver)                                                                                                                                                                                                            | Homo sapiens |
| 8893      | eukaryotic translation initiation factor 2B, subunit 5 epsilon, 82kDa                                                                                                                                                                                | Homo sapiens |
| 23338     | PHD finger protein 15                                                                                                                                                                                                                                | Homo sapiens |
| 4237      | microfibrillar-associated protein 2                                                                                                                                                                                                                  | Homo sapiens |
| 8087      | fragile X mental retardation, autosomal homolog 1                                                                                                                                                                                                    | Homo sapiens |
| 388552    | biogenesis of lysosomal organelles complex-1, subunit 3                                                                                                                                                                                              | Homo sapiens |
| 51279     | complement component 1, r subcomponent-like                                                                                                                                                                                                          | Homo sapiens |
| 253639    | zinc finger protein 620                                                                                                                                                                                                                              | Homo sapiens |
| 2786      | guanine nucleotide binding protein (G protein), gamma 4                                                                                                                                                                                              | Homo sapiens |
| 55088     | chromosome 10 open reading frame 118                                                                                                                                                                                                                 | Homo sapiens |
| 400389    | ribosomal protein L12 pseudogene 2; ribosomal protein L12 pseudogene 32; ribosomal protein L12 pseudogene 35; ribosomal protein L12 pseudogene 19; ribosomal protein L12 pseudogene 6;                                                               | Homo sapiens |
| 440176    | ribosomal protein L12; ribosomal protein L12 pseudogene 14<br>ribosomal protein L12 pseudogene 2; ribosomal protein L12 pseudogene 32; ribosomal protein L12 pseudogene 35; ribosomal protein L12 pseudogene 19; ribosomal protein L12 pseudogene 6; | Homo sapiens |
| 6136      | ribosomal protein L12; ribosomal protein L12 pseudogene 14<br>ribosomal protein L12; ribosomal protein L12 pseudogene 32; ribosomal protein L12 pseudogene 35; ribosomal protein L12 pseudogene 19; ribosomal protein L12 pseudogene 6;              | Homo sapiens |
| 100129982 | ribosomal protein L12; ribosomal protein L12 pseudogene 14<br>ribosomal protein L12 pseudogene 2; ribosomal protein L12 pseudogene 32; ribosomal protein L12 pseudogene 35; ribosomal protein L12 pseudogene 19; ribosomal protein L12 pseudogene 6; | Homo sapiens |
| 100132795 | ribosomal protein L12; ribosomal protein L12 pseudogene 14<br>ribosomal protein L12 pseudogene 2; ribosomal protein L12 pseudogene 32; ribosomal protein L12 pseudogene 35; ribosomal protein L12 pseudogene 19; ribosomal protein L12 pseudogene 6; | Homo sapiens |
| 646875    | ribosomal protein L12; ribosomal protein L12 pseudogene 14<br>ribosomal protein L12 pseudogene 2; ribosomal protein L12 pseudogene 32; ribosomal protein L12 pseudogene 35; ribosomal protein L12 pseudogene 19; ribosomal protein L12 pseudogene 6; | Homo sapiens |
| 729500    | ribosomal protein L12; ribosomal protein L12 pseudogene 14<br>ribosomal protein L12 pseudogene 2; ribosomal protein L12 pseudogene 32; ribosomal protein L12 pseudogene 35; ribosomal protein L12 pseudogene 19; ribosomal protein L12 pseudogene 6; | Homo sapiens |
| 54541     | DNA-damage-inducible transcript 4                                                                                                                                                                                                                    | Homo sapiens |
| 3783      | potassium intermediate/small conductance calcium-activated channel, subfamily N, member 4                                                                                                                                                            | Homo sapiens |
| 140688    | chromosome 20 open reading frame 112                                                                                                                                                                                                                 | Homo sapiens |
| 27010     | thiamin pyrophosphokinase 1                                                                                                                                                                                                                          | Homo sapiens |
| 9183      | ZW10, kinetochore associated, homolog (Drosophila)                                                                                                                                                                                                   | Homo sapiens |
| 100131149 | NADH dehydrogenase (ubiquinone) 1 alpha subcomplex, assembly factor 4; similar to HSPC125                                                                                                                                                            | Homo sapiens |
| 29078     | NADH dehydrogenase (ubiquinone) 1 alpha subcomplex, assembly factor 4; similar to HSPC125                                                                                                                                                            | Homo sapiens |
| 4437      | mutS homolog 3 (E. coli)                                                                                                                                                                                                                             | Homo sapiens |
| 255626    | histone cluster 1, H2ba                                                                                                                                                                                                                              | Homo sapiens |
| 4719      | NADH dehydrogenase (ubiquinone) Fe-S protein 1, 75kDa (NADH-coenzyme Q reductase)                                                                                                                                                                    | Homo sapiens |
| 80021     | transmembrane protein 62                                                                                                                                                                                                                             | Homo sapiens |
| 10128     | leucine-rich PPR-motif containing                                                                                                                                                                                                                    | Homo sapiens |
| 219       | aldehyde dehydrogenase 1 family, member B1                                                                                                                                                                                                           | Homo sapiens |
| 81034     | solute carrier family 25, member 32                                                                                                                                                                                                                  | Homo sapiens |
| 1312      | catechol-O-methyltransferase                                                                                                                                                                                                                         | Homo sapiens |
| 54867     | transmembrane protein 214                                                                                                                                                                                                                            | Homo sapiens |
| 10617     | STAM binding protein                                                                                                                                                                                                                                 | Homo sapiens |
| 85015     | ubiquitin specific peptidase 45                                                                                                                                                                                                                      | Homo sapiens |
| 54805     | cyclin M2                                                                                                                                                                                                                                            | Homo sapiens |
| 3110      | motor neuron and pancreas homeobox 1                                                                                                                                                                                                                 | Homo sapiens |
| 29855     | ubiquitin 1                                                                                                                                                                                                                                          | Homo sapiens |
| 7203      | chaperonin containing TCP1, subunit 3 (gamma)                                                                                                                                                                                                        | Homo sapiens |
| 94274     | protein phosphatase 1, regulatory (inhibitor) subunit 14A                                                                                                                                                                                            | Homo sapiens |
| 65008     | mitochondrial ribosomal protein L1                                                                                                                                                                                                                   | Homo sapiens |
| 29789     | Obg-like ATPase 1                                                                                                                                                                                                                                    | Homo sapiens |
| 168850    | zinc finger protein 800                                                                                                                                                                                                                              | Homo sapiens |
| 51513     | ets variant 7                                                                                                                                                                                                                                        | Homo sapiens |
| 1808      | dihydropyrimidinase-like 2                                                                                                                                                                                                                           | Homo sapiens |
| 223082    | zinc and ring finger 2                                                                                                                                                                                                                               | Homo sapiens |
| 124930    | ankyrin repeat domain 13B                                                                                                                                                                                                                            | Homo sapiens |
| 57721     | methyltransferase like 14                                                                                                                                                                                                                            | Homo sapiens |
| 9170      | lysophosphatidic acid receptor 2                                                                                                                                                                                                                     | Homo sapiens |
| 5326      | pleiomorphic adenoma gene-like 2; similar to pleiomorphic adenoma gene-like 2                                                                                                                                                                        | Homo sapiens |
| 152845    | pleiomorphic adenoma gene-like 2; similar to pleiomorphic adenoma gene-like 2                                                                                                                                                                        | Homo sapiens |
| 705       | bystin-like                                                                                                                                                                                                                                          | Homo sapiens |
| 10492     | synaptotagmin binding, cytoplasmic RNA interacting protein                                                                                                                                                                                           | Homo sapiens |
| 400935    | interleukin 17 receptor E-like                                                                                                                                                                                                                       | Homo sapiens |

|        |                                                                                                   |              |
|--------|---------------------------------------------------------------------------------------------------|--------------|
| 93129  | ORAI calcium release-activated calcium modulator 3                                                | Homo sapiens |
| 11285  | xylosylprotein beta 1,4-galactosyltransferase, polypeptide 7 (galactosyltransferase I)            | Homo sapiens |
| 55048  | vacuolar protein sorting 37 homolog C ( <i>S. cerevisiae</i> )                                    | Homo sapiens |
| 92558  | coiled-coil domain containing 64                                                                  | Homo sapiens |
| 1871   | E2F transcription factor 3                                                                        | Homo sapiens |
| 23299  | bicaudal D homolog 2 ( <i>Drosophila</i> )                                                        | Homo sapiens |
| 5578   | protein kinase C, alpha                                                                           | Homo sapiens |
| 3927   | LIM and SH3 protein 1                                                                             | Homo sapiens |
| 79618  | homeobox containing 1                                                                             | Homo sapiens |
| 79585  | coronin 7                                                                                         | Homo sapiens |
| 9823   | armadillo repeat containing, X-linked 2                                                           | Homo sapiens |
| 22993  | HMG box domain containing 3                                                                       | Homo sapiens |
| 9825   | spermatogenesis associated 2                                                                      | Homo sapiens |
| 10342  | TRK-fused gene                                                                                    | Homo sapiens |
| 29035  | chromosome 16 open reading frame 72                                                               | Homo sapiens |
| 5257   | phosphorylase kinase, beta                                                                        | Homo sapiens |
| 2705   | gap junction protein, beta 1, 32kDa                                                               | Homo sapiens |
| 9092   | squamous cell carcinoma antigen recognized by T cells                                             | Homo sapiens |
| 51696  | headcase homolog ( <i>Drosophila</i> )                                                            | Homo sapiens |
| 51514  | denticleless homolog ( <i>Drosophila</i> )                                                        | Homo sapiens |
| 84159  | AT rich interactive domain 5B (MRF1-like)                                                         | Homo sapiens |
| 115548 | FCH domain only 2                                                                                 | Homo sapiens |
| 11320  | mannosyl (alpha-1,3-)-glycoprotein beta-1,4-N-acetylglucosaminyltransferase, isozyme A            | Homo sapiens |
| 129049 | small G protein signaling modulator 1                                                             | Homo sapiens |
| 6721   | sterol regulatory element binding transcription factor 2                                          | Homo sapiens |
| 1844   | dual specificity phosphatase 2                                                                    | Homo sapiens |
| 64410  | kelch-like 25 ( <i>Drosophila</i> )                                                               | Homo sapiens |
| 253832 | zinc finger, DHHC-type containing 20                                                              | Homo sapiens |
| 7627   | zinc finger protein 75a                                                                           | Homo sapiens |
| 55843  | Rho GTPase activating protein 15                                                                  | Homo sapiens |
| 132660 | lin-54 homolog ( <i>C. elegans</i> )                                                              | Homo sapiens |
| 54962  | TIMELESS interacting protein                                                                      | Homo sapiens |
| 51409  | HemK methyltransferase family member 1                                                            | Homo sapiens |
| 9973   | copper chaperone for superoxide dismutase                                                         | Homo sapiens |
| 4089   | SMAD family member 4                                                                              | Homo sapiens |
| 84665  | myopalladin                                                                                       | Homo sapiens |
| 79710  | MORC family CW-type zinc finger 4                                                                 | Homo sapiens |
| 4059   | basal cell adhesion molecule (Lutheran blood group)                                               | Homo sapiens |
| 23141  | ankyrin repeat and LEM domain containing 2                                                        | Homo sapiens |
| 644    | biliverdin reductase A                                                                            | Homo sapiens |
| 730144 | similar to eukaryotic translation initiation factor 1; eukaryotic translation initiation factor 1 | Homo sapiens |
| 10209  | similar to eukaryotic translation initiation factor 1; eukaryotic translation initiation factor 1 | Homo sapiens |
| 81559  | tripartite motif-containing 11                                                                    | Homo sapiens |
| 160518 | DENN/MADD domain containing 5B                                                                    | Homo sapiens |
| 7262   | pleckstrin homology-like domain, family A, member 2                                               | Homo sapiens |
| 388335 | transmembrane protein 220                                                                         | Homo sapiens |
| 10427  | SEC24 family, member B ( <i>S. cerevisiae</i> )                                                   | Homo sapiens |
| 25778  | dual serine/threonine and tyrosine protein kinase                                                 | Homo sapiens |
| 57659  | zinc finger and BTB domain containing 4                                                           | Homo sapiens |
| 340554 | zinc finger CCCH-type containing 12B                                                              | Homo sapiens |
| 79913  | ARP5 actin-related protein 5 homolog (yeast)                                                      | Homo sapiens |
| 219541 | mediator complex subunit 19                                                                       | Homo sapiens |
| 5209   | 6-phosphofructo-2-kinase/fructose-2,6-biphosphatase 3                                             | Homo sapiens |
| 23132  | RAD54-like 2 ( <i>S. cerevisiae</i> )                                                             | Homo sapiens |
| 23511  | nucleoporin 188kDa                                                                                | Homo sapiens |
| 4357   | mercaptopyruvate sulfurtransferase                                                                | Homo sapiens |
| 10558  | serine palmitoyltransferase, long chain base subunit 1                                            | Homo sapiens |
| 8994   | LIM domains containing 1                                                                          | Homo sapiens |
| 8335   | histone cluster 1, H2ae; histone cluster 1, H2ab                                                  | Homo sapiens |
| 3012   | histone cluster 1, H2ae; histone cluster 1, H2ab                                                  | Homo sapiens |
| 55750  | acylglycerol kinase                                                                               | Homo sapiens |
| 23327  | neural precursor cell expressed, developmentally down-regulated 4-like                            | Homo sapiens |
| 2197   | Finkel-Biskis-Reilly murine sarcoma virus (FBR-MuSV) ubiquitously expressed                       | Homo sapiens |
| 4642   | myosin ID                                                                                         | Homo sapiens |
| 79707  | nucleolar protein 9                                                                               | Homo sapiens |
| 144245 | asparagine-linked glycosylation 10, alpha-1,2-glucosyltransferase homolog B (yeast)               | Homo sapiens |
| 23212  | RRS1 ribosome biogenesis regulator homolog ( <i>S. cerevisiae</i> )                               | Homo sapiens |
| 79693  | yrdC domain containing ( <i>E. coli</i> )                                                         | Homo sapiens |
| 10942  | protease, serine, 21 (testisin)                                                                   | Homo sapiens |
| 2010   | emerin                                                                                            | Homo sapiens |
| 9770   | Ras association (RalGDS/AF-6) domain family member 2                                              | Homo sapiens |
| 26060  | adaptor protein, phosphotyrosine interaction, PH domain and leucine zipper containing 1           | Homo sapiens |
| 10643  | insulin-like growth factor 2 mRNA binding protein 3                                               | Homo sapiens |
| 2055   | ceroid-lipofuscinosis, neuronal 8 (epilepsy, progressive with mental retardation)                 | Homo sapiens |
| 401250 | mitochondrial coiled-coil domain 1                                                                | Homo sapiens |
| 765    | carbonic anhydrase VI                                                                             | Homo sapiens |
| 57697  | Fanconi anemia, complementation group M                                                           | Homo sapiens |

|           |                                                                                                                                                                                                                                                                                                                                                        |              |
|-----------|--------------------------------------------------------------------------------------------------------------------------------------------------------------------------------------------------------------------------------------------------------------------------------------------------------------------------------------------------------|--------------|
| 427       | N-acylsphingosine amidohydrolase (acid ceramidase) 1                                                                                                                                                                                                                                                                                                   | Homo sapiens |
| 26010     | spermatogenesis associated, serine-rich 2-like                                                                                                                                                                                                                                                                                                         | Homo sapiens |
| 6518      | solute carrier family 2 (facilitated glucose/fructose transporter), member 5                                                                                                                                                                                                                                                                           | Homo sapiens |
| 51280     | golgi membrane protein 1                                                                                                                                                                                                                                                                                                                               | Homo sapiens |
| 1295      | collagen, type VIII, alpha 1                                                                                                                                                                                                                                                                                                                           | Homo sapiens |
| 2108      | electron-transfer-flavoprotein, alpha polypeptide                                                                                                                                                                                                                                                                                                      | Homo sapiens |
| 4215      | mitogen-activated protein kinase kinase kinase 3                                                                                                                                                                                                                                                                                                       | Homo sapiens |
| 4077      | neighbor of BRCA1 gene 1                                                                                                                                                                                                                                                                                                                               | Homo sapiens |
| 10038     | poly (ADP-ribose) polymerase 2                                                                                                                                                                                                                                                                                                                         | Homo sapiens |
| 100132658 | hypothetical gene supported by NM_014886; TGF beta-inducible nuclear protein 1; similar to TGF beta-inducible nuclear protein 1                                                                                                                                                                                                                        | Homo sapiens |
| 10412     | hypothetical gene supported by NM_014886; TGF beta-inducible nuclear protein 1; similar to TGF beta-inducible nuclear protein 1                                                                                                                                                                                                                        | Homo sapiens |
| 400061    | hypothetical gene supported by NM_014886; TGF beta-inducible nuclear protein 1; similar to TGF beta-inducible nuclear protein 1                                                                                                                                                                                                                        | Homo sapiens |
| 54737     | M-phase phosphoprotein 8                                                                                                                                                                                                                                                                                                                               | Homo sapiens |
| 64750     | SMAD specific E3 ubiquitin protein ligase 2                                                                                                                                                                                                                                                                                                            | Homo sapiens |
| 100131565 | eukaryotic translation initiation factor 4E; similar to hCG1777996; similar to eukaryotic translation initiation factor 4E                                                                                                                                                                                                                             | Homo sapiens |
| 1977      | eukaryotic translation initiation factor 4E; similar to hCG1777996; similar to eukaryotic translation initiation factor 4E                                                                                                                                                                                                                             | Homo sapiens |
| 100131693 | eukaryotic translation initiation factor 4E; similar to hCG1777996; similar to eukaryotic translation initiation factor 4E                                                                                                                                                                                                                             | Homo sapiens |
| 2194      | fatty acid synthase                                                                                                                                                                                                                                                                                                                                    | Homo sapiens |
| 6927      | HNF1 homeobox A                                                                                                                                                                                                                                                                                                                                        | Homo sapiens |
| 64779     | methenyltetrahydrofolate synthetase domain containing                                                                                                                                                                                                                                                                                                  | Homo sapiens |
| 4784      | nuclear factor I/X (CCAAT-binding transcription factor)                                                                                                                                                                                                                                                                                                | Homo sapiens |
| 3856      | keratin 8 pseudogene 9; similar to keratin 8; keratin 8                                                                                                                                                                                                                                                                                                | Homo sapiens |
| 390601    | keratin 8 pseudogene 9; similar to keratin 8; keratin 8                                                                                                                                                                                                                                                                                                | Homo sapiens |
| 149501    | keratin 8 pseudogene 9; similar to keratin 8; keratin 8                                                                                                                                                                                                                                                                                                | Homo sapiens |
| 10534     | Sjogren syndrome/scleroderma autoantigen 1                                                                                                                                                                                                                                                                                                             | Homo sapiens |
| 4086      | SMAD family member 1                                                                                                                                                                                                                                                                                                                                   | Homo sapiens |
| 54769     | DIRAS family, GTP-binding RAS-like 2                                                                                                                                                                                                                                                                                                                   | Homo sapiens |
| 55699     | isoleucyl-tRNA synthetase 2, mitochondrial                                                                                                                                                                                                                                                                                                             | Homo sapiens |
| 56947     | mitochondrial fission factor                                                                                                                                                                                                                                                                                                                           | Homo sapiens |
| 64794     | DEAD (Asp-Glu-Ala-Asp) box polypeptide 31                                                                                                                                                                                                                                                                                                              | Homo sapiens |
| 55614     | kinesin family member 16B                                                                                                                                                                                                                                                                                                                              | Homo sapiens |
| 57713     | Scm-like with four mbt domains 2                                                                                                                                                                                                                                                                                                                       | Homo sapiens |
| 782       | calcium channel, voltage-dependent, beta 1 subunit                                                                                                                                                                                                                                                                                                     | Homo sapiens |
| 57092     | PEST proteolytic signal containing nuclear protein                                                                                                                                                                                                                                                                                                     | Homo sapiens |
| 1213      | clathrin, heavy chain (Hc)                                                                                                                                                                                                                                                                                                                             | Homo sapiens |
| 440603    | BCL2-like 15                                                                                                                                                                                                                                                                                                                                           | Homo sapiens |
| 64901     | RAN binding protein 17                                                                                                                                                                                                                                                                                                                                 | Homo sapiens |
| 64326     | ring finger and WD repeat domain 2                                                                                                                                                                                                                                                                                                                     | Homo sapiens |
| 10521     | DEAD (Asp-Glu-Ala-Asp) box polypeptide 17                                                                                                                                                                                                                                                                                                              | Homo sapiens |
| 388524    | ribosomal protein SA pseudogene 9; ribosomal protein SA pseudogene 8; ribosomal protein SA pseudogene 58; ribosomal protein SA pseudogene 19; ribosomal protein SA pseudogene 18; ribosomal protein SA; ribosomal protein SA pseudogene 15; ribosomal protein SA pseudogene 61; ribosomal protein SA pseudogene 29; ribosomal protein SA pseudogene 12 | Homo sapiens |
| 389141    | ribosomal protein SA pseudogene 9; ribosomal protein SA pseudogene 8; ribosomal protein SA pseudogene 58; ribosomal protein SA pseudogene 19; ribosomal protein SA pseudogene 18; ribosomal protein SA; ribosomal protein SA pseudogene 15; ribosomal protein SA pseudogene 61; ribosomal protein SA pseudogene 29; ribosomal protein SA pseudogene 12 | Homo sapiens |
| 387867    | ribosomal protein SA pseudogene 9; ribosomal protein SA pseudogene 8; ribosomal protein SA pseudogene 58; ribosomal protein SA pseudogene 19; ribosomal protein SA pseudogene 18; ribosomal protein SA; ribosomal protein SA pseudogene 15; ribosomal protein SA pseudogene 61; ribosomal protein SA pseudogene 29; ribosomal protein SA pseudogene 12 | Homo sapiens |
| 220885    | ribosomal protein SA pseudogene 9; ribosomal protein SA pseudogene 8; ribosomal protein SA pseudogene 58; ribosomal protein SA pseudogene 19; ribosomal protein SA pseudogene 18; ribosomal protein SA; ribosomal protein SA pseudogene 15; ribosomal protein SA pseudogene 61; ribosomal protein SA pseudogene 29; ribosomal protein SA pseudogene 12 | Homo sapiens |
| 653162    | ribosomal protein SA pseudogene 9; ribosomal protein SA pseudogene 8; ribosomal protein SA pseudogene 58; ribosomal protein SA pseudogene 19; ribosomal protein SA pseudogene 18; ribosomal protein SA; ribosomal protein SA pseudogene 15; ribosomal protein SA pseudogene 61; ribosomal protein SA pseudogene 29; ribosomal protein SA pseudogene 12 | Homo sapiens |
| 643617    | ribosomal protein SA pseudogene 9; ribosomal protein SA pseudogene 8; ribosomal protein SA pseudogene 58; ribosomal protein SA pseudogene 19; ribosomal protein SA pseudogene 18; ribosomal protein SA; ribosomal protein SA pseudogene 15; ribosomal protein SA pseudogene 61; ribosomal protein SA pseudogene 29; ribosomal protein SA pseudogene 12 | Homo sapiens |
| 388707    | ribosomal protein SA pseudogene 9; ribosomal protein SA pseudogene 8; ribosomal protein SA pseudogene 58; ribosomal protein SA pseudogene 19; ribosomal protein SA pseudogene 18; ribosomal protein SA; ribosomal protein SA pseudogene 15; ribosomal protein SA pseudogene 61; ribosomal protein SA pseudogene 29; ribosomal protein SA pseudogene 12 | Homo sapiens |
| 730029    | ribosomal protein SA pseudogene 9; ribosomal protein SA pseudogene 8; ribosomal protein SA pseudogene 58; ribosomal protein SA pseudogene 19; ribosomal protein SA pseudogene 18; ribosomal protein SA; ribosomal protein SA pseudogene 15; ribosomal protein SA pseudogene 61; ribosomal protein SA pseudogene 29; ribosomal protein SA pseudogene 12 | Homo sapiens |

|        |                                                                                                                                                                                                                                                                                                                                                        |              |
|--------|--------------------------------------------------------------------------------------------------------------------------------------------------------------------------------------------------------------------------------------------------------------------------------------------------------------------------------------------------------|--------------|
| 644464 | ribosomal protein SA pseudogene 9; ribosomal protein SA pseudogene 8; ribosomal protein SA pseudogene 58; ribosomal protein SA pseudogene 19; ribosomal protein SA pseudogene 18; ribosomal protein SA; ribosomal protein SA pseudogene 15; ribosomal protein SA pseudogene 61; ribosomal protein SA pseudogene 29; ribosomal protein SA pseudogene 12 | Homo sapiens |
| 3921   | ribosomal protein SA pseudogene 9; ribosomal protein SA pseudogene 8; ribosomal protein SA pseudogene 58; ribosomal protein SA pseudogene 19; ribosomal protein SA pseudogene 18; ribosomal protein SA; ribosomal protein SA pseudogene 15; ribosomal protein SA pseudogene 61; ribosomal protein SA pseudogene 29; ribosomal protein SA pseudogene 12 | Homo sapiens |
| 11339  | Opa interacting protein 5                                                                                                                                                                                                                                                                                                                              | Homo sapiens |
| 2625   | GATA binding protein 3                                                                                                                                                                                                                                                                                                                                 | Homo sapiens |
| 8891   | eukaryotic translation initiation factor 2B, subunit 3 gamma, 58kDa                                                                                                                                                                                                                                                                                    | Homo sapiens |
| 375    | ADP-ribosylation factor 1                                                                                                                                                                                                                                                                                                                              | Homo sapiens |
| 3487   | insulin-like growth factor binding protein 4                                                                                                                                                                                                                                                                                                           | Homo sapiens |
| 284186 | transmembrane protein 105                                                                                                                                                                                                                                                                                                                              | Homo sapiens |
| 84268  | RPA interacting protein                                                                                                                                                                                                                                                                                                                                | Homo sapiens |
| 2131   | exostoses (multiple) 1                                                                                                                                                                                                                                                                                                                                 | Homo sapiens |
| 113157 | ribosomal protein, large, P0 pseudogene 2; ribosomal protein, large, P0 pseudogene 3; ribosomal protein, large, P0 pseudogene 6; ribosomal protein, large, P0                                                                                                                                                                                          | Homo sapiens |
| 220717 | ribosomal protein, large, P0 pseudogene 2; ribosomal protein, large, P0 pseudogene 3; ribosomal protein, large, P0 pseudogene 6; ribosomal protein, large, P0                                                                                                                                                                                          | Homo sapiens |
| 122589 | ribosomal protein, large, P0 pseudogene 2; ribosomal protein, large, P0 pseudogene 3; ribosomal protein, large, P0 pseudogene 6; ribosomal protein, large, P0                                                                                                                                                                                          | Homo sapiens |
| 6175   | ribosomal protein, large, P0 pseudogene 2; ribosomal protein, large, P0 pseudogene 3; ribosomal protein, large, P0 pseudogene 6; ribosomal protein, large, P0                                                                                                                                                                                          | Homo sapiens |
| 23035  | PH domain and leucine rich repeat protein phosphatase 2                                                                                                                                                                                                                                                                                                | Homo sapiens |
| 388695 | LysM, putative peptidoglycan-binding, domain containing 1                                                                                                                                                                                                                                                                                              | Homo sapiens |
| 146909 | kinesin family member 18B                                                                                                                                                                                                                                                                                                                              | Homo sapiens |
| 257240 | kelch-like 34 (Drosophila)                                                                                                                                                                                                                                                                                                                             | Homo sapiens |
| 4893   | neuroblastoma RAS viral (v-ras) oncogene homolog                                                                                                                                                                                                                                                                                                       | Homo sapiens |
| 91647  | ATP synthase mitochondrial F1 complex assembly factor 2                                                                                                                                                                                                                                                                                                | Homo sapiens |
| 22868  | FAST kinase domains 2                                                                                                                                                                                                                                                                                                                                  | Homo sapiens |
| 6573   | solute carrier family 19 (folate transporter), member 1                                                                                                                                                                                                                                                                                                | Homo sapiens |
| 10172  | zinc finger protein 256                                                                                                                                                                                                                                                                                                                                | Homo sapiens |
| 90594  | zinc finger protein 439                                                                                                                                                                                                                                                                                                                                | Homo sapiens |
| 221035 | receptor accessory protein 3                                                                                                                                                                                                                                                                                                                           | Homo sapiens |
| 4287   | ataxin 3                                                                                                                                                                                                                                                                                                                                               | Homo sapiens |
| 80218  | N-acetyltransferase 13 (GCN5-related)                                                                                                                                                                                                                                                                                                                  | Homo sapiens |
| 132299 | OCIA domain containing 2                                                                                                                                                                                                                                                                                                                               | Homo sapiens |
| 80005  | dedicator of cytokinesis 5                                                                                                                                                                                                                                                                                                                             | Homo sapiens |
| 146664 | mannosyl (alpha-1,6)-glycoprotein beta-1,6-N-acetyl-glucosaminyltransferase, isozyme B                                                                                                                                                                                                                                                                 | Homo sapiens |
| 23478  | SEC11 homolog A (S. cerevisiae)                                                                                                                                                                                                                                                                                                                        | Homo sapiens |
| 10540  | dynactin 2 (p50)                                                                                                                                                                                                                                                                                                                                       | Homo sapiens |
| 255743 | nephronectin                                                                                                                                                                                                                                                                                                                                           | Homo sapiens |
| 147687 | zinc finger protein 417                                                                                                                                                                                                                                                                                                                                | Homo sapiens |
| 5686   | proteasome (prosome, macropain) subunit, alpha type, 5                                                                                                                                                                                                                                                                                                 | Homo sapiens |
| 8434   | reversion-inducing-cysteine-rich protein with kazal motifs                                                                                                                                                                                                                                                                                             | Homo sapiens |
| 3630   | insulin-like growth factor 2 (somatomedin A); insulin; INS-IGF2 readthrough transcript                                                                                                                                                                                                                                                                 | Homo sapiens |
| 723961 | insulin-like growth factor 2 (somatomedin A); insulin; INS-IGF2 readthrough transcript                                                                                                                                                                                                                                                                 | Homo sapiens |
| 3481   | insulin-like growth factor 2 (somatomedin A); insulin; INS-IGF2 readthrough transcript                                                                                                                                                                                                                                                                 | Homo sapiens |
| 55147  | RNA binding motif protein 23                                                                                                                                                                                                                                                                                                                           | Homo sapiens |
| 25790  | coiled-coil domain containing 19                                                                                                                                                                                                                                                                                                                       | Homo sapiens |
| 8976   | Wiskott-Aldrich syndrome-like                                                                                                                                                                                                                                                                                                                          | Homo sapiens |
| 3313   | heat shock 70kDa protein 9 (mortalin)                                                                                                                                                                                                                                                                                                                  | Homo sapiens |
| 5028   | purinergic receptor P2Y, G-protein coupled, 1                                                                                                                                                                                                                                                                                                          | Homo sapiens |
| 201266 | solute carrier family 39 (metal ion transporter), member 11                                                                                                                                                                                                                                                                                            | Homo sapiens |
| 9444   | quaking homolog, KH domain RNA binding (mouse)                                                                                                                                                                                                                                                                                                         | Homo sapiens |
| 57507  | zinc finger protein 608                                                                                                                                                                                                                                                                                                                                | Homo sapiens |
| 7639   | zinc finger protein 85                                                                                                                                                                                                                                                                                                                                 | Homo sapiens |
| 3780   | potassium intermediate/small conductance calcium-activated channel, subfamily N, member 1                                                                                                                                                                                                                                                              | Homo sapiens |
| 284996 | ring finger protein 149                                                                                                                                                                                                                                                                                                                                | Homo sapiens |
| 79413  | zinc finger, BED-type containing 2                                                                                                                                                                                                                                                                                                                     | Homo sapiens |
| 54884  | retinol saturase (all-trans-retinol 13,14-reductase)                                                                                                                                                                                                                                                                                                   | Homo sapiens |
| 11047  | adhesion regulating molecule 1                                                                                                                                                                                                                                                                                                                         | Homo sapiens |
| 10655  | doublesex and mab-3 related transcription factor 2                                                                                                                                                                                                                                                                                                     | Homo sapiens |
| 10957  | proline-rich nuclear receptor coactivator 1                                                                                                                                                                                                                                                                                                            | Homo sapiens |
| 116236 | abhydrolase domain containing 15                                                                                                                                                                                                                                                                                                                       | Homo sapiens |
| 5348   | FXFD domain containing ion transport regulator 1                                                                                                                                                                                                                                                                                                       | Homo sapiens |
| 729595 | similar to high mobility group box 3; high-mobility group box 3                                                                                                                                                                                                                                                                                        | Homo sapiens |
| 729952 | similar to high mobility group box 3; high-mobility group box 3                                                                                                                                                                                                                                                                                        | Homo sapiens |
| 3149   | similar to high mobility group box 3; high-mobility group box 3                                                                                                                                                                                                                                                                                        | Homo sapiens |
| 646993 | similar to high mobility group box 3; high-mobility group box 3                                                                                                                                                                                                                                                                                        | Homo sapiens |
| 25840  | methyltransferase like 7A                                                                                                                                                                                                                                                                                                                              | Homo sapiens |
| 23279  | nucleoporin 160kDa                                                                                                                                                                                                                                                                                                                                     | Homo sapiens |
| 23787  | mitochondrial carrier homolog 1 (C. elegans)                                                                                                                                                                                                                                                                                                           | Homo sapiens |
| 8293   | small EDRK-rich factor 1A (telomeric); small EDRK-rich factor 1B (centromeric)                                                                                                                                                                                                                                                                         | Homo sapiens |
| 728492 | small EDRK-rich factor 1A (telomeric); small EDRK-rich factor 1B (centromeric)                                                                                                                                                                                                                                                                         | Homo sapiens |
| 79980  | DSN1, MIND kinetochore complex component, homolog (S. cerevisiae)                                                                                                                                                                                                                                                                                      | Homo sapiens |
| 5128   | PCTAIRE protein kinase 2                                                                                                                                                                                                                                                                                                                               | Homo sapiens |

|        |                                                                                                                                    |              |
|--------|------------------------------------------------------------------------------------------------------------------------------------|--------------|
| 578    | BCL2-antagonist/killer 1; BCL2-like 7 pseudogene 1                                                                                 | Homo sapiens |
| 600    | BCL2-antagonist/killer 1; BCL2-like 7 pseudogene 1                                                                                 | Homo sapiens |
| 4093   | SMAD family member 9                                                                                                               | Homo sapiens |
| 57617  | vacuolar protein sorting 18 homolog (S. cerevisiae)                                                                                | Homo sapiens |
| 27241  | Bardet-Biedl syndrome 9                                                                                                            | Homo sapiens |
| 2850   | G protein-coupled receptor 27                                                                                                      | Homo sapiens |
| 1260   | cyclic nucleotide gated channel alpha 2                                                                                            | Homo sapiens |
| 5885   | RAD21 homolog (S. pombe)                                                                                                           | Homo sapiens |
| 6711   | spectrin, beta, non-erythrocytic 1                                                                                                 | Homo sapiens |
| 643873 | similar to eukaryotic translation initiation factor 4H; eukaryotic translation initiation factor 4B                                | Homo sapiens |
| 1975   | similar to eukaryotic translation initiation factor 4H; eukaryotic translation initiation factor 4B                                | Homo sapiens |
| 64600  | phospholipase A2, group IIF                                                                                                        | Homo sapiens |
| 9231   | discs, large homolog 5 (Drosophila)                                                                                                | Homo sapiens |
| 55294  | F-box and WD repeat domain containing 7                                                                                            | Homo sapiens |
| 63932  | chromosome X open reading frame 56                                                                                                 | Homo sapiens |
| 55038  | cell division cycle associated 4                                                                                                   | Homo sapiens |
| 148867 | solute carrier family 30 (zinc transporter), member 7                                                                              | Homo sapiens |
| 9960   | ubiquitin specific peptidase 3                                                                                                     | Homo sapiens |
| 94137  | retinitis pigmentosa 1-like 1                                                                                                      | Homo sapiens |
| 8396   | phosphatidylinositol-5-phosphate 4-kinase, type II, beta                                                                           | Homo sapiens |
| 8761   | poly(A) binding protein, cytoplasmic 4 (inducible form)                                                                            | Homo sapiens |
| 84164  | activating signal cointegrator 1 complex subunit 2                                                                                 | Homo sapiens |
| 3914   | laminin, beta 3                                                                                                                    | Homo sapiens |
| 11130  | ZW10 interactor                                                                                                                    | Homo sapiens |
| 57506  | mitochondrial antiviral signaling protein                                                                                          | Homo sapiens |
| 10460  | transforming, acidic coiled-coil containing protein 3                                                                              | Homo sapiens |
| 51150  | stromal cell derived factor 4                                                                                                      | Homo sapiens |
| 124751 | KRAB-A domain containing 2                                                                                                         | Homo sapiens |
| 168374 | zinc finger protein 92                                                                                                             | Homo sapiens |
| 83636  | chromosome 19 open reading frame 12                                                                                                | Homo sapiens |
| 23109  | dendrin                                                                                                                            | Homo sapiens |
| 7186   | TNF receptor-associated factor 2                                                                                                   | Homo sapiens |
| 51755  | Cdc2-related kinase, arginine/serine-rich                                                                                          | Homo sapiens |
| 23386  | NudC domain containing 3                                                                                                           | Homo sapiens |
| 93624  | transcriptional adaptor 2 (ADA2 homolog, yeast)-beta                                                                               | Homo sapiens |
| 6509   | solute carrier family 1 (glutamate/neutral amino acid transporter), member 4                                                       | Homo sapiens |
| 55163  | pyridoxamine 5'-phosphate oxidase                                                                                                  | Homo sapiens |
| 7484   | wingless-type MMTV integration site family, member 9B                                                                              | Homo sapiens |
| 4771   | neurofibromin 2 (merlin)                                                                                                           | Homo sapiens |
| 10193  | ring finger protein 41                                                                                                             | Homo sapiens |
| 3455   | interferon (alpha, beta and omega) receptor 2                                                                                      | Homo sapiens |
| 7336   | ubiquitin-conjugating enzyme E2 variant 2                                                                                          | Homo sapiens |
| 3224   | homeobox C8                                                                                                                        | Homo sapiens |
| 23764  | v-maf musculoaponeurotic fibrosarcoma oncogene homolog F (avian)                                                                   | Homo sapiens |
| 85364  | zinc finger, CCHC domain containing 3                                                                                              | Homo sapiens |
| 3200   | homeobox A3                                                                                                                        | Homo sapiens |
| 10678  | UDP-GlcNAc:betaGal beta-1,3-N-acetylglucosaminyltransferase 1; UDP-GlcNAc:betaGal beta-1,3-N-acetylglucosaminyltransferase 2       | Homo sapiens |
| 11041  | UDP-GlcNAc:betaGal beta-1,3-N-acetylglucosaminyltransferase 1; UDP-GlcNAc:betaGal beta-1,3-N-acetylglucosaminyltransferase 2       | Homo sapiens |
| 1163   | CDC28 protein kinase regulatory subunit 1B                                                                                         | Homo sapiens |
| 374407 | DnaJ (Hsp40) related, subfamily B, member 13                                                                                       | Homo sapiens |
| 122786 | FERM domain containing 6                                                                                                           | Homo sapiens |
| 169611 | olfactomedin-like 2A                                                                                                               | Homo sapiens |
| 10140  | transducer of ERBB2, 1                                                                                                             | Homo sapiens |
| 131965 | methyltransferase like 6                                                                                                           | Homo sapiens |
| 26762  | hepatitis A virus cellular receptor 1                                                                                              | Homo sapiens |
| 56255  | thioredoxin-related transmembrane protein 4                                                                                        | Homo sapiens |
| 81873  | actin related protein 2/3 complex, subunit 5-like                                                                                  | Homo sapiens |
| 374900 | zinc finger protein 568                                                                                                            | Homo sapiens |
| 1822   | atrophin 1                                                                                                                         | Homo sapiens |
| 1434   | CSE1 chromosome segregation 1-like (yeast)                                                                                         | Homo sapiens |
| 80344  | WD repeat domain 23                                                                                                                | Homo sapiens |
| 11321  | GPN-loop GTPase 1                                                                                                                  | Homo sapiens |
| 808    | calmodulin 3 (phosphorylase kinase, delta); calmodulin 2 (phosphorylase kinase, delta); calmodulin 1 (phosphorylase kinase, delta) | Homo sapiens |
| 805    | calmodulin 3 (phosphorylase kinase, delta); calmodulin 2 (phosphorylase kinase, delta); calmodulin 1 (phosphorylase kinase, delta) | Homo sapiens |
| 801    | calmodulin 3 (phosphorylase kinase, delta); calmodulin 2 (phosphorylase kinase, delta); calmodulin 1 (phosphorylase kinase, delta) | Homo sapiens |
| 56675  | nuclear receptor interacting protein 3                                                                                             | Homo sapiens |
| 7405   | UV radiation resistance associated gene                                                                                            | Homo sapiens |
| 728689 | eukaryotic translation initiation factor 3, subunit C-like                                                                         | Homo sapiens |
| 10934  | mortality factor 4; mortality factor 4 like 1                                                                                      | Homo sapiens |
| 10933  | mortality factor 4; mortality factor 4 like 1                                                                                      | Homo sapiens |
| 92856  | IMP4, U3 small nucleolar ribonucleoprotein, homolog (yeast)                                                                        | Homo sapiens |
| 23484  | leptin receptor overlapping transcript-like 1                                                                                      | Homo sapiens |

|           |                                                                                           |              |
|-----------|-------------------------------------------------------------------------------------------|--------------|
| 57461     | ISY1 splicing factor homolog ( <i>S. cerevisiae</i> )                                     | Homo sapiens |
| 445       | argininosuccinate synthetase 1                                                            | Homo sapiens |
| 7171      | tropomyosin 4                                                                             | Homo sapiens |
| 57522     | SLIT-ROBO Rho GTPase activating protein 1                                                 | Homo sapiens |
| 10847     | Snf2-related CREBBP activator protein                                                     | Homo sapiens |
| 1352      | COX10 homolog, cytochrome c oxidase assembly protein, heme A: farnesyltransferase (yeast) | Homo sapiens |
| 1760      | dystrophia myotonica-protein kinase                                                       | Homo sapiens |
| 23549     | aspartyl aminopeptidase                                                                   | Homo sapiens |
| 51759     | chromosome 9 open reading frame 78                                                        | Homo sapiens |
| 2802      | golgi autoantigen, golgin subfamily a, 3                                                  | Homo sapiens |
| 6452      | SH3-domain binding protein 2                                                              | Homo sapiens |
| 6907      | transducin (beta)-like 1X-linked                                                          | Homo sapiens |
| 23092     | Rho GTPase activating protein 26                                                          | Homo sapiens |
| 80196     | ring finger protein 34                                                                    | Homo sapiens |
| 1211      | clathrin, light chain (Lca)                                                               | Homo sapiens |
| 790       | carbamoyl-phosphate synthetase 2, aspartate transcarbamylase, and dihydroorotase          | Homo sapiens |
| 7070      | Thy-1 cell surface antigen                                                                | Homo sapiens |
| 65249     | zinc finger, SWIM-type containing 4                                                       | Homo sapiens |
| 54665     | round spermatid basic protein 1                                                           | Homo sapiens |
| 1891      | enoyl Coenzyme A hydratase 1, peroxisomal                                                 | Homo sapiens |
| 56943     | enhancer of yellow 2 homolog ( <i>Drosophila</i> )                                        | Homo sapiens |
| 125919    | zinc finger protein 543                                                                   | Homo sapiens |
| 867       | Cas-Br-M (murine) ecotropic retroviral transforming sequence                              | Homo sapiens |
| 200014    | coiled-coil and C2 domain containing 1B                                                   | Homo sapiens |
| 64770     | coiled-coil domain containing 14                                                          | Homo sapiens |
| 8021      | nucleoporin 214kDa                                                                        | Homo sapiens |
| 162963    | zinc finger protein 610                                                                   | Homo sapiens |
| 4862      | neuronal PAS domain protein 2                                                             | Homo sapiens |
| 283237    | tetratricopeptide repeat domain 9C                                                        | Homo sapiens |
| 1280      | collagen, type II, alpha 1                                                                | Homo sapiens |
| 27284     | sulfotransferase family, cytosolic, 1B, member 1                                          | Homo sapiens |
| 5805      | 6-pyruvoyltetrahydropterin synthase                                                       | Homo sapiens |
| 7098      | toll-like receptor 3                                                                      | Homo sapiens |
| 79137     | family with sequence similarity 134, member A                                             | Homo sapiens |
| 83985     | spinster homolog 1 ( <i>Drosophila</i> )                                                  | Homo sapiens |
| 5901      | RAN, member RAS oncogene family                                                           | Homo sapiens |
| 120114    | FAT tumor suppressor homolog 3 ( <i>Drosophila</i> )                                      | Homo sapiens |
| 3959      | lectin, galactoside-binding, soluble, 3 binding protein                                   | Homo sapiens |
| 5930      | retinoblastoma binding protein 6                                                          | Homo sapiens |
| 79770     | thioredoxin domain containing 15                                                          | Homo sapiens |
| 22821     | RAS p21 protein activator 3                                                               | Homo sapiens |
| 6632      | small nuclear ribonucleoprotein D1 polypeptide 16kDa; hypothetical protein LOC100129492   | Homo sapiens |
| 100129492 | small nuclear ribonucleoprotein D1 polypeptide 16kDa; hypothetical protein LOC100129492   | Homo sapiens |
| 57446     | NDRG family member 3                                                                      | Homo sapiens |
| 51318     | mitochondrial ribosomal protein L35                                                       | Homo sapiens |
| 22924     | microtubule-associated protein, RP/EB family, member 3                                    | Homo sapiens |
| 4201      | male-enhanced antigen 1                                                                   | Homo sapiens |
| 51290     | ERGIC and golgi 2                                                                         | Homo sapiens |
| 8131      | chromosome 16 open reading frame 35                                                       | Homo sapiens |
| 29974     | APOBEC1 complementation factor                                                            | Homo sapiens |
| 51645     | peptidylprolyl isomerase (cyclophilin)-like 1                                             | Homo sapiens |
| 4238      | microfibrillar-associated protein 3                                                       | Homo sapiens |
| 11080     | DnaJ (Hsp40) homolog, subfamily B, member 4                                               | Homo sapiens |
| 9783      | regulating synaptic membrane exocytosis 3                                                 | Homo sapiens |
| 29998     | glioma tumor suppressor candidate region gene 1                                           | Homo sapiens |
| 55347     | abhydrolase domain containing 10                                                          | Homo sapiens |
| 9702      | centrosomal protein 57kDa                                                                 | Homo sapiens |
| 9948      | WD repeat domain 1                                                                        | Homo sapiens |
| 284273    | zinc binding alcohol dehydrogenase domain containing 2                                    | Homo sapiens |
| 57646     | ubiquitin specific peptidase 28                                                           | Homo sapiens |
| 10075     | HECT, UBA and WWE domain containing 1                                                     | Homo sapiens |
| 55142     | HAUS augmin-like complex, subunit 2                                                       | Homo sapiens |
| 6242      | rhotekin                                                                                  | Homo sapiens |
| 8562      | density-regulated protein                                                                 | Homo sapiens |
| 5557      | primase, DNA, polypeptide 1 (49kDa)                                                       | Homo sapiens |
| 51144     | hydroxysteroid (17-beta) dehydrogenase 12                                                 | Homo sapiens |
| 359       | aquaporin 2 (collecting duct)                                                             | Homo sapiens |
| 84961     | F-box and leucine-rich repeat protein 20                                                  | Homo sapiens |
| 55        | acid phosphatase, prostate                                                                | Homo sapiens |
| 51762     | RAB8B, member RAS oncogene family                                                         | Homo sapiens |
| 51540     | selenocysteine lyase                                                                      | Homo sapiens |
| 11065     | ubiquitin-conjugating enzyme E2C                                                          | Homo sapiens |
| 80020     | FAD-dependent oxidoreductase domain containing 2                                          | Homo sapiens |
| 3720      | jumonji, AT rich interactive domain 2                                                     | Homo sapiens |
| 3475      | interferon-related developmental regulator 1                                              | Homo sapiens |
| 9168      | thymosin beta 10                                                                          | Homo sapiens |
| 821       | calnexin                                                                                  | Homo sapiens |
| 54897     | castor zinc finger 1                                                                      | Homo sapiens |

|           |                                                                                                                 |              |
|-----------|-----------------------------------------------------------------------------------------------------------------|--------------|
| 55759     | WD repeat domain 12                                                                                             | Homo sapiens |
| 162       | adaptor-related protein complex 1, beta 1 subunit                                                               | Homo sapiens |
| 7716      | vascular endothelial zinc finger 1                                                                              | Homo sapiens |
| 22913     | RNA binding protein, autoantigenic (hnRNP-associated with lethal yellow homolog (mouse))                        | Homo sapiens |
| 55206     | strawberry notch homolog 1 (Drosophila)                                                                         | Homo sapiens |
| 113510    | helicase, POLQ-like                                                                                             | Homo sapiens |
| 1017      | cyclin-dependent kinase 2                                                                                       | Homo sapiens |
| 7029      | transcription factor Dp-2 (E2F dimerization partner 2)                                                          | Homo sapiens |
| 283377    | SPRY domain containing 4                                                                                        | Homo sapiens |
| 54620     | F-box and leucine-rich repeat protein 19                                                                        | Homo sapiens |
| 10365     | Kruppel-like factor 2 (lung)                                                                                    | Homo sapiens |
| 25777     | unc-84 homolog B (C. elegans)                                                                                   | Homo sapiens |
| 727940    | Rhox homeobox family, member 2B                                                                                 | Homo sapiens |
| 23089     | paternally expressed 10                                                                                         | Homo sapiens |
| 115330    | G protein-coupled receptor 146                                                                                  | Homo sapiens |
| 23205     | acyl-CoA synthetase bubblegum family member 1                                                                   | Homo sapiens |
| 10097     | ARP2 actin-related protein 2 homolog (yeast)                                                                    | Homo sapiens |
| 7546      | Zic family member 2 (odd-paired homolog, Drosophila)                                                            | Homo sapiens |
| 3839      | karyopherin alpha 3 (importin alpha 4)                                                                          | Homo sapiens |
| 2677      | gamma-glutamyl carboxylase                                                                                      | Homo sapiens |
| 5467      | peroxisome proliferator-activated receptor delta                                                                | Homo sapiens |
| 3479      | insulin-like growth factor 1 (somatomedin C)                                                                    | Homo sapiens |
| 656       | bone morphogenetic protein 8b                                                                                   | Homo sapiens |
| 144363    | LYR motif containing 5                                                                                          | Homo sapiens |
| 55108     | BSD domain containing 1                                                                                         | Homo sapiens |
| 375248    | ankyrin repeat domain 36; similar to ankyrin repeat domain 36                                                   | Homo sapiens |
| 652726    | ankyrin repeat domain 36; similar to ankyrin repeat domain 36                                                   | Homo sapiens |
| 1641      | doublecortin                                                                                                    | Homo sapiens |
| 153090    | DAB2 interacting protein                                                                                        | Homo sapiens |
| 6160      | ribosomal protein L31 pseudogene 49; ribosomal protein L31 pseudogene 17; ribosomal protein L31                 | Homo sapiens |
| 100129882 | ribosomal protein L31 pseudogene 49; ribosomal protein L31 pseudogene 17; ribosomal protein L31                 | Homo sapiens |
| 653773    | ribosomal protein L31 pseudogene 49; ribosomal protein L31 pseudogene 17; ribosomal protein L31                 | Homo sapiens |
| 6198      | ribosomal protein S6 kinase, 70kDa, polypeptide 1                                                               | Homo sapiens |
| 4340      | myelin oligodendrocyte glycoprotein                                                                             | Homo sapiens |
| 22849     | cytoplasmic polyadenylation element binding protein 3                                                           | Homo sapiens |
| 113235    | solute carrier family 46 (folate transporter), member 1                                                         | Homo sapiens |
| 152006    | ring finger protein 38                                                                                          | Homo sapiens |
| 1968      | eukaryotic translation initiation factor 2, subunit 3 gamma, 52kDa                                              | Homo sapiens |
| 1604      | CD55 molecule, decay accelerating factor for complement (Cromer blood group)                                    | Homo sapiens |
| 23111     | spastic paraplegia 20 (Troyer syndrome)                                                                         | Homo sapiens |
| 26517     | translocase of inner mitochondrial membrane 13 homolog (yeast)                                                  | Homo sapiens |
| 23530     | nicotinamide nucleotide transhydrogenase                                                                        | Homo sapiens |
| 51528     | chromosome 14 open reading frame 100                                                                            | Homo sapiens |
| 221061    | family with sequence similarity 171, member A1                                                                  | Homo sapiens |
| 348262    | hypothetical protein LOC348262                                                                                  | Homo sapiens |
| 6921      | similar to elongin C; transcription elongation factor B (SIII), polypeptide 1 (15kDa, elongin C)                | Homo sapiens |
| 100132973 | similar to elongin C; transcription elongation factor B (SIII), polypeptide 1 (15kDa, elongin C)                | Homo sapiens |
| 5195      | peroxisomal biogenesis factor 14                                                                                | Homo sapiens |
| 9026      | huntingtin interacting protein 1 related                                                                        | Homo sapiens |
| 80155     | NMDA receptor regulated 1                                                                                       | Homo sapiens |
| 253559    | cell adhesion molecule 2                                                                                        | Homo sapiens |
| 57189     | KIAA1147                                                                                                        | Homo sapiens |
| 11221     | dual specificity phosphatase 10                                                                                 | Homo sapiens |
| 23607     | CD2-associated protein                                                                                          | Homo sapiens |
| 377       | ADP-ribosylation factor 3                                                                                       | Homo sapiens |
| 10217     | CTD (carboxy-terminal domain, RNA polymerase II, polypeptide A) small phosphatase-like                          | Homo sapiens |
| 84881     | RNA pseudouridylylase synthase domain containing 4                                                              | Homo sapiens |
| 147040    | potassium channel tetramerisation domain containing 11                                                          | Homo sapiens |
| 3659      | interferon regulatory factor 1                                                                                  | Homo sapiens |
| 132720    | chromosome 4 open reading frame 32                                                                              | Homo sapiens |
| 990       | cell division cycle 6 homolog (S. cerevisiae)                                                                   | Homo sapiens |
| 350       | apolipoprotein H (beta-2-glycoprotein I)                                                                        | Homo sapiens |
| 9361      | lon peptidase 1, mitochondrial                                                                                  | Homo sapiens |
| 11329     | serine/threonine kinase 38                                                                                      | Homo sapiens |
| 9420      | cytochrome P450, family 7, subfamily B, polypeptide 1                                                           | Homo sapiens |
| 149840    | chromosome 20 open reading frame 196                                                                            | Homo sapiens |
| 148213    | zinc finger protein 681                                                                                         | Homo sapiens |
| 10208     | ubiquitin specific peptidase like 1                                                                             | Homo sapiens |
| 9188      | DEAD (Asp-Glu-Ala-Asp) box polypeptide 21                                                                       | Homo sapiens |
| 56916     | SWI/SNF-related, matrix-associated actin-dependent regulator of chromatin, subfamily a, containing DEAD/H box 1 | Homo sapiens |
| 64786     | TBC1 domain family, member 15                                                                                   | Homo sapiens |
| 6510      | solute carrier family 1 (neutral amino acid transporter), member 5                                              | Homo sapiens |
| 84269     | coiled-coil-helix-coiled-coil-helix domain containing 5                                                         | Homo sapiens |



|           |                                                                                                                                                                                                                                                                                                                                                                                                    |              |
|-----------|----------------------------------------------------------------------------------------------------------------------------------------------------------------------------------------------------------------------------------------------------------------------------------------------------------------------------------------------------------------------------------------------------|--------------|
| 89890     | kelch repeat and BTB (POZ) domain containing 6                                                                                                                                                                                                                                                                                                                                                     | Homo sapiens |
| 421       | armadillo repeat gene deletes in velocardiofacial syndrome                                                                                                                                                                                                                                                                                                                                         | Homo sapiens |
| 2339      | farnesyltransferase, CAAX box, alpha                                                                                                                                                                                                                                                                                                                                                               | Homo sapiens |
| 10095     | actin related protein 2/3 complex, subunit 1B, 41kDa; similar to Actin-related protein 2/3 complex subunit 1B (ARP2/3 complex 41 kDa subunit) (p41-ARC)                                                                                                                                                                                                                                            | Homo sapiens |
| 653888    | actin related protein 2/3 complex, subunit 1B, 41kDa; similar to Actin-related protein 2/3 complex subunit 1B (ARP2/3 complex 41 kDa subunit) (p41-ARC)                                                                                                                                                                                                                                            | Homo sapiens |
| 10611     | PDZ and LIM domain 5                                                                                                                                                                                                                                                                                                                                                                               | Homo sapiens |
| 89796     | neuron navigator 1                                                                                                                                                                                                                                                                                                                                                                                 | Homo sapiens |
| 150365    | meiosis inhibitor 1                                                                                                                                                                                                                                                                                                                                                                                | Homo sapiens |
| 126069    | zinc finger protein 491                                                                                                                                                                                                                                                                                                                                                                            | Homo sapiens |
| 100131509 | similar to hkir2.2x; similar to inward rectifying K <sup>+</sup> channel negative regulator Kir2.2v; potassium inwardly-rectifying channel, subfamily J, member 12                                                                                                                                                                                                                                 | Homo sapiens |
| 3768      | similar to hkir2.2x; similar to inward rectifying K <sup>+</sup> channel negative regulator Kir2.2v; potassium inwardly-rectifying channel, subfamily J, member 12                                                                                                                                                                                                                                 | Homo sapiens |
| 100134444 | similar to hkir2.2x; similar to inward rectifying K <sup>+</sup> channel negative regulator Kir2.2v; potassium inwardly-rectifying channel, subfamily J, member 12                                                                                                                                                                                                                                 | Homo sapiens |
| 257629    | ankyrin repeat and sterile alpha motif domain containing 4B                                                                                                                                                                                                                                                                                                                                        | Homo sapiens |
| 2050      | EPH receptor B4                                                                                                                                                                                                                                                                                                                                                                                    | Homo sapiens |
| 10793     | zinc finger protein 273                                                                                                                                                                                                                                                                                                                                                                            | Homo sapiens |
| 100132742 | ribosomal protein L17 pseudogene 22; ribosomal protein L17 pseudogene 36; ribosomal protein L17 pseudogene 20; similar to ribosomal protein L17; ribosomal protein L17 pseudogene 33; ribosomal protein L17 pseudogene 34; ribosomal protein L17 pseudogene 9; ribosomal protein L17; ribosomal protein L17 pseudogene 18; ribosomal protein L17 pseudogene 7; ribosomal protein L17 pseudogene 39 | Homo sapiens |
| 391655    | ribosomal protein L17 pseudogene 22; ribosomal protein L17 pseudogene 36; ribosomal protein L17 pseudogene 20; similar to ribosomal protein L17; ribosomal protein L17 pseudogene 33; ribosomal protein L17 pseudogene 34; ribosomal protein L17 pseudogene 9; ribosomal protein L17; ribosomal protein L17 pseudogene 18; ribosomal protein L17 pseudogene 7; ribosomal protein L17 pseudogene 39 | Homo sapiens |
| 727984    | ribosomal protein L17 pseudogene 22; ribosomal protein L17 pseudogene 36; ribosomal protein L17 pseudogene 20; similar to ribosomal protein L17; ribosomal protein L17 pseudogene 33; ribosomal protein L17 pseudogene 34; ribosomal protein L17 pseudogene 9; ribosomal protein L17; ribosomal protein L17 pseudogene 18; ribosomal protein L17 pseudogene 7; ribosomal protein L17 pseudogene 39 | Homo sapiens |
| 729046    | ribosomal protein L17 pseudogene 22; ribosomal protein L17 pseudogene 36; ribosomal protein L17 pseudogene 20; similar to ribosomal protein L17; ribosomal protein L17 pseudogene 33; ribosomal protein L17 pseudogene 34; ribosomal protein L17 pseudogene 9; ribosomal protein L17; ribosomal protein L17 pseudogene 18; ribosomal protein L17 pseudogene 7; ribosomal protein L17 pseudogene 39 | Homo sapiens |
| 729301    | ribosomal protein L17 pseudogene 22; ribosomal protein L17 pseudogene 36; ribosomal protein L17 pseudogene 20; similar to ribosomal protein L17; ribosomal protein L17 pseudogene 33; ribosomal protein L17 pseudogene 34; ribosomal protein L17 pseudogene 9; ribosomal protein L17; ribosomal protein L17 pseudogene 18; ribosomal protein L17 pseudogene 7; ribosomal protein L17 pseudogene 39 | Homo sapiens |
| 729340    | ribosomal protein L17 pseudogene 22; ribosomal protein L17 pseudogene 36; ribosomal protein L17 pseudogene 20; similar to ribosomal protein L17; ribosomal protein L17 pseudogene 33; ribosomal protein L17 pseudogene 34; ribosomal protein L17 pseudogene 9; ribosomal protein L17; ribosomal protein L17 pseudogene 18; ribosomal protein L17 pseudogene 7; ribosomal protein L17 pseudogene 39 | Homo sapiens |
| 646909    | ribosomal protein L17 pseudogene 22; ribosomal protein L17 pseudogene 36; ribosomal protein L17 pseudogene 20; similar to ribosomal protein L17; ribosomal protein L17 pseudogene 33; ribosomal protein L17 pseudogene 34; ribosomal protein L17 pseudogene 9; ribosomal protein L17; ribosomal protein L17 pseudogene 18; ribosomal protein L17 pseudogene 7; ribosomal protein L17 pseudogene 39 | Homo sapiens |
| 645296    | ribosomal protein L17 pseudogene 22; ribosomal protein L17 pseudogene 36; ribosomal protein L17 pseudogene 20; similar to ribosomal protein L17; ribosomal protein L17 pseudogene 33; ribosomal protein L17 pseudogene 34; ribosomal protein L17 pseudogene 9; ribosomal protein L17; ribosomal protein L17 pseudogene 18; ribosomal protein L17 pseudogene 7; ribosomal protein L17 pseudogene 39 | Homo sapiens |
| 6139      | ribosomal protein L17 pseudogene 22; ribosomal protein L17 pseudogene 36; ribosomal protein L17 pseudogene 20; similar to ribosomal protein L17; ribosomal protein L17 pseudogene 33; ribosomal protein L17 pseudogene 34; ribosomal protein L17 pseudogene 9; ribosomal protein L17; ribosomal protein L17 pseudogene 18; ribosomal protein L17 pseudogene 7; ribosomal protein L17 pseudogene 39 | Homo sapiens |
| 100129657 | ribosomal protein L17 pseudogene 22; ribosomal protein L17 pseudogene 36; ribosomal protein L17 pseudogene 20; similar to ribosomal protein L17; ribosomal protein L17 pseudogene 33; ribosomal protein L17 pseudogene 34; ribosomal protein L17 pseudogene 9; ribosomal protein L17; ribosomal protein L17 pseudogene 18; ribosomal protein L17 pseudogene 7; ribosomal protein L17 pseudogene 39 | Homo sapiens |
| 643863    | ribosomal protein L17 pseudogene 22; ribosomal protein L17 pseudogene 36; ribosomal protein L17 pseudogene 20; similar to ribosomal protein L17; ribosomal protein L17 pseudogene 33; ribosomal protein L17 pseudogene 34; ribosomal protein L17 pseudogene 9; ribosomal protein L17; ribosomal protein L17 pseudogene 18; ribosomal protein L17 pseudogene 7; ribosomal protein L17 pseudogene 39 | Homo sapiens |
| 1845      | dual specificity phosphatase 3                                                                                                                                                                                                                                                                                                                                                                     | Homo sapiens |
| 64328     | exportin 4                                                                                                                                                                                                                                                                                                                                                                                         | Homo sapiens |
| 104       | adenosine deaminase, RNA-specific, B1 (RED1 homolog rat)                                                                                                                                                                                                                                                                                                                                           | Homo sapiens |
| 5978      | RE1-silencing transcription factor                                                                                                                                                                                                                                                                                                                                                                 | Homo sapiens |

|           |                                                                                                                                             |              |
|-----------|---------------------------------------------------------------------------------------------------------------------------------------------|--------------|
| 2560      | gamma-aminobutyric acid (GABA) A receptor, beta 1                                                                                           | Homo sapiens |
| 9424      | potassium channel, subfamily K, member 6                                                                                                    | Homo sapiens |
| 10943     | male-specific lethal 3 homolog (Drosophila)                                                                                                 | Homo sapiens |
| 25833     | POU class 2 homeobox 3                                                                                                                      | Homo sapiens |
| 7048      | transforming growth factor, beta receptor II (70/80kDa)                                                                                     | Homo sapiens |
| 730013    | ATP-binding cassette, sub-family C, member 6 pseudogene 2; ATP-binding cassette, sub-family C (CFTR/MRP), member 6                          | Homo sapiens |
| 368       | ATP-binding cassette, sub-family C, member 6 pseudogene 2; ATP-binding cassette, sub-family C (CFTR/MRP), member 6                          | Homo sapiens |
| 81793     | toll-like receptor 10                                                                                                                       | Homo sapiens |
| 55182     | ring finger protein 220                                                                                                                     | Homo sapiens |
| 23165     | nucleoporin 205kDa                                                                                                                          | Homo sapiens |
| 84790     | tubulin, alpha 1c                                                                                                                           | Homo sapiens |
| 9695      | ER degradation enhancer, mannosidase alpha-like 1                                                                                           | Homo sapiens |
| 7781      | solute carrier family 30 (zinc transporter), member 3                                                                                       | Homo sapiens |
| 3608      | interleukin enhancer binding factor 2, 45kDa                                                                                                | Homo sapiens |
| 55028     | chromosome 17 open reading frame 80                                                                                                         | Homo sapiens |
| 1827      | regulator of calcineurin 1                                                                                                                  | Homo sapiens |
| 5058      | p21 protein (Cdc42/Rac)-activated kinase 1                                                                                                  | Homo sapiens |
| 10613     | ER lipid raft associated 1                                                                                                                  | Homo sapiens |
| 29964     | prickle homolog 4 (Drosophila)                                                                                                              | Homo sapiens |
| 51117     | coenzyme Q4 homolog (S. cerevisiae)                                                                                                         | Homo sapiens |
| 1184      | chloride channel 5                                                                                                                          | Homo sapiens |
| 9525      | vacuolar protein sorting 4 homolog B (S. cerevisiae)                                                                                        | Homo sapiens |
| 79094     | ChaC, cation transport regulator homolog 1 (E. coli)                                                                                        | Homo sapiens |
| 10146     | GTPase activating protein (SH3 domain) binding protein 1                                                                                    | Homo sapiens |
| 11140     | cell division cycle 37 homolog (S. cerevisiae)                                                                                              | Homo sapiens |
| 23223     | ribosomal RNA processing 12 homolog (S. cerevisiae)                                                                                         | Homo sapiens |
| 1829      | desmoglein 2                                                                                                                                | Homo sapiens |
| 153443    | serum response factor binding protein 1                                                                                                     | Homo sapiens |
| 645086    | chromosome 11 open reading frame 58 pseudogene; chromosome 11 open reading frame 58                                                         | Homo sapiens |
| 10944     | chromosome 11 open reading frame 58 pseudogene; chromosome 11 open reading frame 58                                                         | Homo sapiens |
| 162966    | zinc finger protein 600                                                                                                                     | Homo sapiens |
| 8665      | eukaryotic translation initiation factor 3, subunit F; similar to hCG2040283                                                                | Homo sapiens |
| 390282    | eukaryotic translation initiation factor 3, subunit F; similar to hCG2040283                                                                | Homo sapiens |
| 51077     | FCF1 small subunit (SSU) processome component homolog (S. cerevisiae)                                                                       | Homo sapiens |
| 100128525 | ubiquinol-cytochrome c reductase, Rieske iron-sulfur polypeptide-like 1; ubiquinol-cytochrome c reductase, Rieske iron-sulfur polypeptide 1 | Homo sapiens |
| 7386      | ubiquinol-cytochrome c reductase, Rieske iron-sulfur polypeptide-like 1; ubiquinol-cytochrome c reductase, Rieske iron-sulfur polypeptide 1 | Homo sapiens |
| 54813     | kelch-like 28 (Drosophila)                                                                                                                  | Homo sapiens |
| 339745    | speckle-type POZ protein-like                                                                                                               | Homo sapiens |
| 7776      | zinc finger protein 236                                                                                                                     | Homo sapiens |
| 4192      | midkine (neurite growth-promoting factor 2)                                                                                                 | Homo sapiens |
| 91807     | myosin light chain kinase 3                                                                                                                 | Homo sapiens |
| 653689    | glutathione S-transferase theta 2B (gene/pseudogene); glutathione S-transferase theta 2                                                     | Homo sapiens |
| 2953      | glutathione S-transferase theta 2B (gene/pseudogene); glutathione S-transferase theta 2                                                     | Homo sapiens |
| 1635      | dCMP deaminase                                                                                                                              | Homo sapiens |
| 1326      | mitogen-activated protein kinase kinase kinase 8                                                                                            | Homo sapiens |
| 23369     | pumilio homolog 2 (Drosophila)                                                                                                              | Homo sapiens |
| 10308     | zinc finger protein 267                                                                                                                     | Homo sapiens |
| 1859      | dual-specificity tyrosine-(Y)-phosphorylation regulated kinase 1A                                                                           | Homo sapiens |
| 26505     | cyclin M3                                                                                                                                   | Homo sapiens |
| 81887     | LAS1-like (S. cerevisiae)                                                                                                                   | Homo sapiens |
| 7020      | transcription factor AP-2 alpha (activating enhancer binding protein 2 alpha)                                                               | Homo sapiens |
| 10020     | glucosamine (UDP-N-acetyl)-2-epimerase/N-acetylmannosamine kinase                                                                           | Homo sapiens |
| 2188      | Fanconi anemia, complementation group F                                                                                                     | Homo sapiens |
| 728489    | DNL-type zinc finger                                                                                                                        | Homo sapiens |
| 144110    | transmembrane protein 86A                                                                                                                   | Homo sapiens |
| 79158     | N-acetylglucosamine-1-phosphate transferase, alpha and beta subunits                                                                        | Homo sapiens |
| 3421      | isocitrate dehydrogenase 3 (NAD+) gamma                                                                                                     | Homo sapiens |
| 7388      | ubiquinol-cytochrome c reductase hinge protein-like; ubiquinol-cytochrome c reductase hinge protein                                         | Homo sapiens |
| 440567    | ubiquinol-cytochrome c reductase hinge protein-like; ubiquinol-cytochrome c reductase hinge protein                                         | Homo sapiens |
| 2673      | glutamine-fructose-6-phosphate transaminase 1                                                                                               | Homo sapiens |
| 80095     | zinc finger protein 606                                                                                                                     | Homo sapiens |
| 5814      | purine-rich element binding protein B                                                                                                       | Homo sapiens |
| 86        | actin-like 6A                                                                                                                               | Homo sapiens |
| 1655      | DEAD (Asp-Glu-Ala-Asp) box polypeptide 5                                                                                                    | Homo sapiens |
| 166793    | zinc finger protein 509                                                                                                                     | Homo sapiens |
| 1944      | ephrin-A3                                                                                                                                   | Homo sapiens |
| 134510    | ubiquitin-like domain containing CTD phosphatase 1                                                                                          | Homo sapiens |
| 5660      | prosaposin                                                                                                                                  | Homo sapiens |
| 56957     | OTU domain containing 7B                                                                                                                    | Homo sapiens |
| 22839     | discs, large (Drosophila) homolog-associated protein 4                                                                                      | Homo sapiens |
| 1025      | cyclin-dependent kinase 9                                                                                                                   | Homo sapiens |
| 9698      | pumilio homolog 1 (Drosophila)                                                                                                              | Homo sapiens |
| 8818      | dolichyl-phosphate mannosyltransferase polypeptide 2, regulatory subunit                                                                    | Homo sapiens |

|        |                                                                                                                                                                              |              |
|--------|------------------------------------------------------------------------------------------------------------------------------------------------------------------------------|--------------|
| 678    | zinc finger protein 36, C3H type-like 2                                                                                                                                      | Homo sapiens |
| 246269 | lactation elevated 1                                                                                                                                                         | Homo sapiens |
| 50488  | misshapen-like kinase 1 (zebrafish)                                                                                                                                          | Homo sapiens |
| 170850 | potassium voltage-gated channel, subfamily G, member 3                                                                                                                       | Homo sapiens |
| 389524 | GTF2I repeat domain containing 2B                                                                                                                                            | Homo sapiens |
| 164656 | transmembrane protease, serine 6                                                                                                                                             | Homo sapiens |
| 8663   | eukaryotic translation initiation factor 3, subunit C                                                                                                                        | Homo sapiens |
| 4804   | nerve growth factor receptor (TNFR superfamily, member 16)                                                                                                                   | Homo sapiens |
| 79188  | transmembrane protein 43                                                                                                                                                     | Homo sapiens |
| 55341  | large subunit GTPase 1 homolog (S. cerevisiae)                                                                                                                               | Homo sapiens |
| 23418  | crumbs homolog 1 (Drosophila)                                                                                                                                                | Homo sapiens |
| 8349   | histone cluster 2, H2be                                                                                                                                                      | Homo sapiens |
| 7562   | zinc finger protein 708                                                                                                                                                      | Homo sapiens |
| 653155 | similar to hCG1820375; PRP4 pre-mRNA processing factor 4 homolog B (yeast)                                                                                                   | Homo sapiens |
| 8899   | similar to hCG1820375; PRP4 pre-mRNA processing factor 4 homolog B (yeast)                                                                                                   | Homo sapiens |
| 64744  | small ArfGAP2                                                                                                                                                                | Homo sapiens |
| 2935   | G1 to S phase transition 1                                                                                                                                                   | Homo sapiens |
| 90441  | zinc finger protein 622                                                                                                                                                      | Homo sapiens |
| 25820  | ariadne homolog, ubiquitin-conjugating enzyme E2 binding protein, 1 (Drosophila)                                                                                             | Homo sapiens |
| 9412   | mediator complex subunit 21                                                                                                                                                  | Homo sapiens |
| 2643   | GTP cyclohydrolase 1                                                                                                                                                         | Homo sapiens |
| 5090   | pre-B-cell leukemia homeobox 3                                                                                                                                               | Homo sapiens |
| 27089  | ubiquinol-cytochrome c reductase, complex III subunit VII, 9.5kDa                                                                                                            | Homo sapiens |
| 134430 | WD repeat domain 36                                                                                                                                                          | Homo sapiens |
| 5916   | retinoic acid receptor, gamma                                                                                                                                                | Homo sapiens |
| 64388  | gremlin 2, cysteine knot superfamily, homolog (Xenopus laevis)                                                                                                               | Homo sapiens |
| 391059 | ferric-chelate reductase 1                                                                                                                                                   | Homo sapiens |
| 25775  | chromosome 22 open reading frame 24                                                                                                                                          | Homo sapiens |
| 147841 | SPC24, NDC80 kinetochore complex component, homolog (S. cerevisiae)                                                                                                          | Homo sapiens |
| 340252 | zinc finger protein 680                                                                                                                                                      | Homo sapiens |
| 4850   | CCR4-NOT transcription complex, subunit 4                                                                                                                                    | Homo sapiens |
|        | solute carrier family 25 (mitochondrial carrier; adenine nucleotide translocator), member 5;                                                                                 |              |
| 292    | solute carrier family 25 (mitochondrial carrier; adenine nucleotide translocator), member 5<br>pseudogene 8                                                                  | Homo sapiens |
|        | solute carrier family 25 (mitochondrial carrier; adenine nucleotide translocator), member 5;                                                                                 |              |
| 392301 | solute carrier family 25 (mitochondrial carrier; adenine nucleotide translocator), member 5<br>pseudogene 8                                                                  | Homo sapiens |
| 148479 | PHD finger protein 13                                                                                                                                                        | Homo sapiens |
| 8076   | microfibrillar associated protein 5                                                                                                                                          | Homo sapiens |
| 652826 | similar to 26S protease regulatory subunit 6B (MIP224) (MB67-interacting protein) (TAT-binding<br>protein 7) (TBP-7); proteasome (prosome, macropain) 26S subunit, ATPase, 4 | Homo sapiens |
| 5704   | similar to 26S protease regulatory subunit 6B (MIP224) (MB67-interacting protein) (TAT-binding<br>protein 7) (TBP-7); proteasome (prosome, macropain) 26S subunit, ATPase, 4 | Homo sapiens |
| 56674  | TMEM9 domain family, member B                                                                                                                                                | Homo sapiens |
| 23094  | signal-induced proliferation-associated 1 like 3                                                                                                                             | Homo sapiens |
| 9765   | zinc finger, FYVE domain containing 16                                                                                                                                       | Homo sapiens |
| 8340   | histone cluster 1, H2b1                                                                                                                                                      | Homo sapiens |
| 751867 | regulator of chromosome condensation 1; SNHG3-RCC1 readthrough transcript                                                                                                    | Homo sapiens |
| 1104   | regulator of chromosome condensation 1; SNHG3-RCC1 readthrough transcript                                                                                                    | Homo sapiens |
| 3549   | Indian hedgehog homolog (Drosophila)                                                                                                                                         | Homo sapiens |
| 56910  | StAR-related lipid transfer (START) domain containing 7                                                                                                                      | Homo sapiens |
| 1026   | cyclin-dependent kinase inhibitor 1A (p21, Cip1)                                                                                                                             | Homo sapiens |
| 8835   | suppressor of cytokine signaling 2                                                                                                                                           | Homo sapiens |
| 93517  | short chain dehydrogenase/reductase family 42E, member 1                                                                                                                     | Homo sapiens |
| 54552  | guanine nucleotide binding protein-like 3 (nucleolar)-like                                                                                                                   | Homo sapiens |
| 5859   | glutamyl-tRNA synthetase                                                                                                                                                     | Homo sapiens |
| 6240   | ribonucleotide reductase M1                                                                                                                                                  | Homo sapiens |
| 23142  | DCN1, defective in cullin neddylation 1, domain containing 4 (S. cerevisiae)                                                                                                 | Homo sapiens |
| 54386  | telomeric repeat binding factor 2, interacting protein                                                                                                                       | Homo sapiens |
| 9419   | cysteine-rich PDZ-binding protein                                                                                                                                            | Homo sapiens |
| 9556   | chromosome 14 open reading frame 2                                                                                                                                           | Homo sapiens |
| 5693   | proteasome (prosome, macropain) subunit, beta type, 5                                                                                                                        | Homo sapiens |
| 64077  | phospholysine phosphohistidine inorganic pyrophosphate phosphatase                                                                                                           | Homo sapiens |
| 5361   | plexin A1                                                                                                                                                                    | Homo sapiens |
| 11331  | prohibitin 2                                                                                                                                                                 | Homo sapiens |
| 9002   | coagulation factor II (thrombin) receptor-like 3                                                                                                                             | Homo sapiens |
| 8517   | inhibitor of kappa light polypeptide gene enhancer in B-cells, kinase gamma                                                                                                  | Homo sapiens |
| 57478  | ubiquitin specific peptidase 31                                                                                                                                              | Homo sapiens |
| 976    | CD97 molecule                                                                                                                                                                | Homo sapiens |
| 163033 | zinc finger protein 579                                                                                                                                                      | Homo sapiens |
| 5099   | protocadherin 7                                                                                                                                                              | Homo sapiens |
| 29127  | Rac GTPase activating protein 1 pseudogene; Rac GTPase activating protein 1                                                                                                  | Homo sapiens |
| 83956  | Rac GTPase activating protein 1 pseudogene; Rac GTPase activating protein 1                                                                                                  | Homo sapiens |
| 5510   | protein phosphatase 1, regulatory (inhibitor) subunit 7                                                                                                                      | Homo sapiens |
| 8727   | catenin (cadherin-associated protein), alpha-like 1                                                                                                                          | Homo sapiens |
| 54891  | IN080 complex subunit D                                                                                                                                                      | Homo sapiens |
| 23077  | MYC binding protein 2                                                                                                                                                        | Homo sapiens |
| 645822 | similar to TBC1 domain family, member 3; ubiquitin specific peptidase 32                                                                                                     | Homo sapiens |
| 84669  | similar to TBC1 domain family, member 3; ubiquitin specific peptidase 32                                                                                                     | Homo sapiens |

|           |                                                                                                 |              |
|-----------|-------------------------------------------------------------------------------------------------|--------------|
| 6018      | rearranged L-myc fusion                                                                         | Homo sapiens |
| 2806      | glutamic-oxaloacetic transaminase 2, mitochondrial (aspartate aminotransferase 2)               | Homo sapiens |
| 10131     | TNF receptor-associated protein 1                                                               | Homo sapiens |
| 9683      | NEDD4 binding protein 1                                                                         | Homo sapiens |
| 1182      | chloride channel 3                                                                              | Homo sapiens |
| 51393     | transient receptor potential cation channel, subfamily V, member 2                              | Homo sapiens |
| 3556      | interleukin 1 receptor accessory protein                                                        | Homo sapiens |
| 26508     | hairy/enhancer-of-split related with YRPW motif-like                                            | Homo sapiens |
| 8449      | DEAH (Asp-Glu-Ala-His) box polypeptide 16                                                       | Homo sapiens |
| 7851      | mal, T-cell differentiation protein-like                                                        | Homo sapiens |
| 147660    | zinc finger protein 578                                                                         | Homo sapiens |
| 150290    | dual specificity phosphatase 18                                                                 | Homo sapiens |
| 9526      | mannose-P-dolichol utilization defect 1                                                         | Homo sapiens |
| 7710      | zinc finger protein 154                                                                         | Homo sapiens |
| 23382     | adenosylhomocysteinase-like 2                                                                   | Homo sapiens |
| 84275     | solute carrier family 25, member 33                                                             | Homo sapiens |
| 55835     | centromere protein J                                                                            | Homo sapiens |
| 7791      | zyxin                                                                                           | Homo sapiens |
| 91607     | schlafen family member 11                                                                       | Homo sapiens |
| 57761     | tribbles homolog 3 (Drosophila)                                                                 | Homo sapiens |
| 3615      | IMP (inosine monophosphate) dehydrogenase 2                                                     | Homo sapiens |
| 25800     | solute carrier family 39 (zinc transporter), member 6                                           | Homo sapiens |
| 124454    | glutamyl-tRNA synthetase 2, mitochondrial (putative)                                            | Homo sapiens |
| 10123     | ADP-ribosylation factor-like 4C                                                                 | Homo sapiens |
| 390874    | one cut homeobox 3                                                                              | Homo sapiens |
| 100131098 | hypothetical protein LOC100131098; calcium channel, voltage-dependent, L type, alpha 1C subunit | Homo sapiens |
| 775       | hypothetical protein LOC100131098; calcium channel, voltage-dependent, L type, alpha 1C subunit | Homo sapiens |
| 10885     | WD repeat domain 3                                                                              | Homo sapiens |
| 23746     | aryl hydrocarbon receptor interacting protein-like 1                                            | Homo sapiens |
| 9031      | bromodomain adjacent to zinc finger domain, 1B                                                  | Homo sapiens |
| 10962     | myeloid/lymphoid or mixed-lineage leukemia (trithorax homolog, Drosophila); translocated to, 11 | Homo sapiens |
| 126526    | chromosome 19 open reading frame 47                                                             | Homo sapiens |
| 64768     | inositol 1,3,4,5,6-pentakisphosphate 2-kinase                                                   | Homo sapiens |
| 57458     | transmembrane and coiled-coil domain family 3                                                   | Homo sapiens |
| 3304      | heat shock 70kDa protein 1A; heat shock 70kDa protein 1B                                        | Homo sapiens |
| 3303      | heat shock 70kDa protein 1A; heat shock 70kDa protein 1B                                        | Homo sapiens |
| 4952      | oculocerebrorenal syndrome of Lowe                                                              | Homo sapiens |
| 29967     | low density lipoprotein-related protein 12                                                      | Homo sapiens |
| 9516      | lipopolysaccharide-induced TNF factor                                                           | Homo sapiens |
| 145741    | family with sequence similarity 148, member A                                                   | Homo sapiens |
| 7049      | transforming growth factor, beta receptor III                                                   | Homo sapiens |
| 79003     | MIS12, MIND kinetochore complex component, homolog (S. pombe)                                   | Homo sapiens |
| 9879      | DEAD (Asp-Glu-Ala-Asp) box polypeptide 46                                                       | Homo sapiens |
| 79073     | transmembrane protein 109                                                                       | Homo sapiens |
| 6574      | solute carrier family 20 (phosphate transporter), member 1                                      | Homo sapiens |
| 84747     | unc-119 homolog B (C. elegans)                                                                  | Homo sapiens |
| 9367      | RAB9A, member RAS oncogene family                                                               | Homo sapiens |
| 64854     | ubiquitin specific peptidase 46                                                                 | Homo sapiens |
| 389084    | chromosome 2 open reading frame 82                                                              | Homo sapiens |
| 10384     | butyrophilin, subfamily 3, member A3                                                            | Homo sapiens |
| 653121    | zinc finger and BTB domain containing 8A                                                        | Homo sapiens |
| 54206     | ERBB receptor feedback inhibitor 1                                                              | Homo sapiens |
| 56241     | sushi domain containing 2                                                                       | Homo sapiens |
| 8120      | adaptor-related protein complex 3, beta 2 subunit                                               | Homo sapiens |
| 124997    | WD repeat domain 81                                                                             | Homo sapiens |
| 64969     | mitochondrial ribosomal protein S5                                                              | Homo sapiens |
| 57050     | UTP3, small subunit (SSU) processome component, homolog (S. cerevisiae)                         | Homo sapiens |
| 961       | CD47 molecule                                                                                   | Homo sapiens |
| 2201      | fibrillin 2                                                                                     | Homo sapiens |
| 57544     | thioredoxin domain containing 16                                                                | Homo sapiens |
| 9874      | tousled-like kinase 1                                                                           | Homo sapiens |
| 7477      | wingless-type MMTV integration site family, member 7B                                           | Homo sapiens |
| 57801     | hairy and enhancer of split 4 (Drosophila)                                                      | Homo sapiens |
| 80032     | zinc finger protein 556                                                                         | Homo sapiens |
| 164091    | progesterin and adipoQ receptor family member VII                                               | Homo sapiens |
| 79598     | centrosomal protein 97kDa                                                                       | Homo sapiens |
| 55611     | OTU domain, ubiquitin aldehyde binding 1                                                        | Homo sapiens |
| 3903      | leukocyte-associated immunoglobulin-like receptor 1                                             | Homo sapiens |
| 64131     | xylosyltransferase I                                                                            | Homo sapiens |
| 57105     | cysteinyl leukotriene receptor 2                                                                | Homo sapiens |
| 8542      | apolipoprotein L, 1                                                                             | Homo sapiens |
| 5079      | paired box 5                                                                                    | Homo sapiens |
| 150726    | F-box protein 41                                                                                | Homo sapiens |
| 8887      | Tax1 (human T-cell leukemia virus type I) binding protein 1                                     | Homo sapiens |
| 91120     | zinc finger protein 682                                                                         | Homo sapiens |
| 8991      | selenium binding protein 1                                                                      | Homo sapiens |

|           |                                                                                                                                                                                                                      |              |
|-----------|----------------------------------------------------------------------------------------------------------------------------------------------------------------------------------------------------------------------|--------------|
| 153339    | similar to transmembrane protein 167A; transmembrane protein 167A                                                                                                                                                    | Homo sapiens |
| 100129118 | similar to transmembrane protein 167A; transmembrane protein 167A                                                                                                                                                    | Homo sapiens |
| 4946      | ornithine decarboxylase antizyme 1                                                                                                                                                                                   | Homo sapiens |
| 257218    | SNF2 histone linker PHD RING helicase                                                                                                                                                                                | Homo sapiens |
| 10594     | PRP8 pre-mRNA processing factor 8 homolog (S. cerevisiae)                                                                                                                                                            | Homo sapiens |
| 55114     | Rho GTPase activating protein 17                                                                                                                                                                                     | Homo sapiens |
| 10015     | programmed cell death 6 interacting protein                                                                                                                                                                          | Homo sapiens |
| 771       | carbonic anhydrase XII                                                                                                                                                                                               | Homo sapiens |
| 5358      | plastin 3 (T isoform)                                                                                                                                                                                                | Homo sapiens |
| 64172     | O-sialoglycoprotein endopeptidase-like 1                                                                                                                                                                             | Homo sapiens |
| 26053     | autism susceptibility candidate 2                                                                                                                                                                                    | Homo sapiens |
| 81839     | vang-like 1 (van gogh, Drosophila)                                                                                                                                                                                   | Homo sapiens |
| 1981      | eukaryotic translation initiation factor 4 gamma, 1                                                                                                                                                                  | Homo sapiens |
| 222236    | N-acyl phosphatidylethanolamine phospholipase D                                                                                                                                                                      | Homo sapiens |
| 84105     | pterin-4 alpha-carbinolamine dehydratase/dimerization cofactor of hepatocyte nuclear factor 1 alpha (TCF1) 2                                                                                                         | Homo sapiens |
| 117584    | ring finger and FYVE-like domain containing 1                                                                                                                                                                        | Homo sapiens |
| 132864    | cytoplasmic polyadenylation element binding protein 2                                                                                                                                                                | Homo sapiens |
| 5433      | polymerase (RNA) II (DNA directed) polypeptide D                                                                                                                                                                     | Homo sapiens |
| 22834     | zinc finger protein 652                                                                                                                                                                                              | Homo sapiens |
| 50717     | WD repeat domain 42A                                                                                                                                                                                                 | Homo sapiens |
| 644790    | ribosomal protein S15a pseudogene 17; ribosomal protein S15a pseudogene 19; ribosomal protein S15a pseudogene 12; ribosomal protein S15a pseudogene 24; ribosomal protein S15a pseudogene 11; ribosomal protein S15a | Homo sapiens |
| 6210      | ribosomal protein S15a pseudogene 17; ribosomal protein S15a pseudogene 19; ribosomal protein S15a pseudogene 12; ribosomal protein S15a pseudogene 24; ribosomal protein S15a pseudogene 11; ribosomal protein S15a | Homo sapiens |
| 391656    | ribosomal protein S15a pseudogene 17; ribosomal protein S15a pseudogene 19; ribosomal protein S15a pseudogene 12; ribosomal protein S15a pseudogene 24; ribosomal protein S15a pseudogene 11; ribosomal protein S15a | Homo sapiens |
| 648729    | ribosomal protein S15a pseudogene 17; ribosomal protein S15a pseudogene 19; ribosomal protein S15a pseudogene 12; ribosomal protein S15a pseudogene 24; ribosomal protein S15a pseudogene 11; ribosomal protein S15a | Homo sapiens |
| 646819    | ribosomal protein S15a pseudogene 17; ribosomal protein S15a pseudogene 19; ribosomal protein S15a pseudogene 12; ribosomal protein S15a pseudogene 24; ribosomal protein S15a pseudogene 11; ribosomal protein S15a | Homo sapiens |
| 100129243 | ribosomal protein S15a pseudogene 17; ribosomal protein S15a pseudogene 19; ribosomal protein S15a pseudogene 12; ribosomal protein S15a pseudogene 24; ribosomal protein S15a pseudogene 11; ribosomal protein S15a | Homo sapiens |
| 64979     | mitochondrial ribosomal protein L36                                                                                                                                                                                  | Homo sapiens |
| 55502     | hairy and enhancer of split 6 (Drosophila)                                                                                                                                                                           | Homo sapiens |
| 23262     | histidine acid phosphatase domain containing 1                                                                                                                                                                       | Homo sapiens |
| 7078      | TIMP metalloproteinase inhibitor 3                                                                                                                                                                                   | Homo sapiens |
| 8312      | axin 1                                                                                                                                                                                                               | Homo sapiens |
| 132203    | sentan, cilia apical structure protein                                                                                                                                                                               | Homo sapiens |
| 23039     | exportin 7                                                                                                                                                                                                           | Homo sapiens |
| 60492     | coiled-coil domain containing 90B                                                                                                                                                                                    | Homo sapiens |
| 121006    | family with sequence similarity 186, member A                                                                                                                                                                        | Homo sapiens |
| 245908    | defensin, beta 105A; defensin, beta 105B                                                                                                                                                                             | Homo sapiens |
| 504180    | defensin, beta 105A; defensin, beta 105B                                                                                                                                                                             | Homo sapiens |
| 5534      | protein phosphatase 3 (formerly 2B), regulatory subunit B, alpha isoform                                                                                                                                             | Homo sapiens |
| 2319      | flotillin 2                                                                                                                                                                                                          | Homo sapiens |
| 4040      | low density lipoprotein receptor-related protein 6                                                                                                                                                                   | Homo sapiens |
| 50628     | gem (nuclear organelle) associated protein 4                                                                                                                                                                         | Homo sapiens |
| 6050      | ribonuclease/angiogenin inhibitor 1                                                                                                                                                                                  | Homo sapiens |
| 57728     | WD repeat domain 19                                                                                                                                                                                                  | Homo sapiens |
| 5683      | proteasome (prosome, macropain) subunit, alpha type, 2                                                                                                                                                               | Homo sapiens |
| 51246     | shisa homolog 5 (Xenopus laevis)                                                                                                                                                                                     | Homo sapiens |
| 161742    | sprouty-related, EVH1 domain containing 1                                                                                                                                                                            | Homo sapiens |
| 8876      | vanin 1                                                                                                                                                                                                              | Homo sapiens |
| 22884     | WD repeat domain 37                                                                                                                                                                                                  | Homo sapiens |
| 376267    | RAB15, member RAS oncogene family                                                                                                                                                                                    | Homo sapiens |
| 22888     | U-box domain containing 5                                                                                                                                                                                            | Homo sapiens |
| 55041     | pleckstrin homology domain containing, family B (evectins) member 2                                                                                                                                                  | Homo sapiens |
| 144402    | copine VIII                                                                                                                                                                                                          | Homo sapiens |
| 4814      | ninjurin 1                                                                                                                                                                                                           | Homo sapiens |
| 7384      | ubiquinol-cytochrome c reductase core protein I                                                                                                                                                                      | Homo sapiens |
| 2803      | golgi autoantigen, golgin subfamily a, 4                                                                                                                                                                             | Homo sapiens |
| 836       | caspase 3, apoptosis-related cysteine peptidase                                                                                                                                                                      | Homo sapiens |
| 5226      | phosphogluconate dehydrogenase                                                                                                                                                                                       | Homo sapiens |
| 196403    | deltex homolog 3 (Drosophila)                                                                                                                                                                                        | Homo sapiens |
| 55588     | mediator complex subunit 29                                                                                                                                                                                          | Homo sapiens |
| 121599    | Spi-C transcription factor (Spi-1/PU.1 related)                                                                                                                                                                      | Homo sapiens |
| 30        | acetyl-Coenzyme A acyltransferase 1                                                                                                                                                                                  | Homo sapiens |
| 5931      | retinoblastoma binding protein 7                                                                                                                                                                                     | Homo sapiens |
| 147923    | zinc finger protein 420                                                                                                                                                                                              | Homo sapiens |
| 8323      | frizzled homolog 6 (Drosophila)                                                                                                                                                                                      | Homo sapiens |
| 8773      | synaptosomal-associated protein, 23kDa                                                                                                                                                                               | Homo sapiens |
| 10556     | ribonuclease P/MRP 30kDa subunit                                                                                                                                                                                     | Homo sapiens |

|        |                                                                                                         |              |
|--------|---------------------------------------------------------------------------------------------------------|--------------|
| 6634   | small nuclear ribonucleoprotein D3 polypeptide 18kDa                                                    | Homo sapiens |
| 331    | X-linked inhibitor of apoptosis                                                                         | Homo sapiens |
| 51270  | transcription factor Dp family, member 3                                                                | Homo sapiens |
| 57551  | TAO kinase 1                                                                                            | Homo sapiens |
| 23396  | phosphatidylinositol-4-phosphate 5-kinase, type I, gamma                                                | Homo sapiens |
| 4904   | Y box binding protein 1                                                                                 | Homo sapiens |
| 51276  | zinc finger protein 571                                                                                 | Homo sapiens |
| 132204 | synaptopodin                                                                                            | Homo sapiens |
| 58525  | widely interspaced zinc finger motifs                                                                   | Homo sapiens |
| 3641   | insulin-like 4 (placenta)                                                                               | Homo sapiens |
| 63893  | ubiquitin-conjugating enzyme E20                                                                        | Homo sapiens |
| 4928   | nucleoporin 98kDa                                                                                       | Homo sapiens |
| 56603  | cytochrome P450, family 26, subfamily B, polypeptide 1                                                  | Homo sapiens |
| 64782  | apoptosis enhancing nuclease                                                                            | Homo sapiens |
| 4249   | mannosyl (alpha-1,6-)-glycoprotein beta-1,6-N-acetyl-glucosaminyltransferase; hypothetical<br>LOC151162 | Homo sapiens |
| 151162 | mannosyl (alpha-1,6-)-glycoprotein beta-1,6-N-acetyl-glucosaminyltransferase; hypothetical<br>LOC151162 | Homo sapiens |
| 26292  | c-myc binding protein                                                                                   | Homo sapiens |
| 84327  | zinc finger, BED-type containing 3                                                                      | Homo sapiens |
| 9631   | nucleoporin 155kDa                                                                                      | Homo sapiens |
| 3858   | keratin 10                                                                                              | Homo sapiens |
| 3399   | inhibitor of DNA binding 3, dominant negative helix-loop-helix protein                                  | Homo sapiens |
| 29887  | sorting nexin 10                                                                                        | Homo sapiens |
| 56154  | testis expressed 15                                                                                     | Homo sapiens |
| 2876   | glutathione peroxidase 1                                                                                | Homo sapiens |
| 6886   | T-cell acute lymphocytic leukemia 1                                                                     | Homo sapiens |
| 23201  | family with sequence similarity 168, member A                                                           | Homo sapiens |
| 677790 | transmembrane protein 78                                                                                | Homo sapiens |
| 4017   | lysyl oxidase-like 2                                                                                    | Homo sapiens |
| 337867 | UBA domain containing 2                                                                                 | Homo sapiens |
| 2264   | fibroblast growth factor receptor 4                                                                     | Homo sapiens |
| 257364 | sorting nexin 33                                                                                        | Homo sapiens |
| 256472 | transmembrane protein 151A                                                                              | Homo sapiens |
| 23219  | F-box protein 28                                                                                        | Homo sapiens |
| 8266   | ubiquitin-like 4A                                                                                       | Homo sapiens |
| 440270 | golgi autoantigen, golgin subfamily a, 8B; golgi autoantigen, golgin subfamily a, 8A                    | Homo sapiens |
| 23015  | golgi autoantigen, golgin subfamily a, 8B; golgi autoantigen, golgin subfamily a, 8A                    | Homo sapiens |
| 7389   | uroporphyrinogen decarboxylase                                                                          | Homo sapiens |
| 4037   | low density lipoprotein receptor-related protein 3                                                      | Homo sapiens |
| 433    | asialoglycoprotein receptor 2                                                                           | Homo sapiens |
| 23175  | lipin 1                                                                                                 | Homo sapiens |
| 25949  | SYF2 homolog, RNA splicing factor (S. cerevisiae)                                                       | Homo sapiens |
| 4173   | minichromosome maintenance complex component 4                                                          | Homo sapiens |
| 6155   | ribosomal protein L27                                                                                   | Homo sapiens |
| 64764  | cAMP responsive element binding protein 3-like 2                                                        | Homo sapiens |
| 5710   | proteasome (prosome, macropain) 26S subunit, non-ATPase, 4                                              | Homo sapiens |
| 5048   | platelet-activating factor acetylhydrolase, isoform Ib, subunit 1 (45kDa)                               | Homo sapiens |
| 5878   | RAB5C, member RAS oncogene family                                                                       | Homo sapiens |
| 1603   | defender against cell death 1                                                                           | Homo sapiens |
| 55298  | ring finger protein 121                                                                                 | Homo sapiens |
| 51009  | Der1-like domain family, member 2                                                                       | Homo sapiens |
| 751071 | methyltransferase like 12                                                                               | Homo sapiens |
| 22984  | programmed cell death 11                                                                                | Homo sapiens |
| 10743  | retinoic acid induced 1                                                                                 | Homo sapiens |
| 10712  | chromosome 1 open reading frame 2                                                                       | Homo sapiens |
| 10951  | chromobox homolog 1 (HP1 beta homolog Drosophila )                                                      | Homo sapiens |
| 4863   | nuclear protein, ataxia-telangiectasia locus                                                            | Homo sapiens |
| 4061   | lymphocyte antigen 6 complex, locus E                                                                   | Homo sapiens |
| 375790 | agrin                                                                                                   | Homo sapiens |
| 894    | cyclin D2                                                                                               | Homo sapiens |
| 10461  | c-mer proto-oncogene tyrosine kinase                                                                    | Homo sapiens |
| 284325 | chromosome 19 open reading frame 54                                                                     | Homo sapiens |
| 5045   | furin (paired basic amino acid cleaving enzyme)                                                         | Homo sapiens |
